# Supplementary material for: Circadian Desynchrony Promotes Metabolic Disruption in a Mouse Model of Shiftwork
Source: PubMed Central journal article supplement (PMC3357388; doi:10.1371/journal.pone.0037150), 2012-05-21
Supplement: pone.0037150.s004.pdf [file pone.0037150.s004.pdf]

Supp Table 1

Complete list of genes in each category from Figure 3 for liver

| Liver Class I |               |          |          |
|---------------|---------------|----------|----------|
| Probe ID      | Gene ID       | Con Peak | TSR Peak |
| 10344966      | Ly96          | 1        | 1        |
| 10345183      | Cdk10         | 13       | 13       |
| 10345492      | Cnnm3         | 1        | 1        |
| 10345675      | Npas2         | 1        | 1        |
| 10346298      | Coq10b        | 13       | 13       |
| 10347748      | Acsl3         | 19       | 19       |
| 10348000      | 2810459M11Rik | 7        | 7        |
| 10348078      |               | 13       | 13       |
| 10349081      | Phlpp1        | 7        | 7        |
| 10349512      | Ubxn4         | 1        | 1        |
| 10349932      | Etnk2         | 13       | 13       |
| 10350535      | Tpr           | 1        | 1        |
| 10352548      | Slc30a10      | 1        | 1        |
| 10353450      | Gm4956        | 19       | 19       |
| 10353450      | Gm4956        | 19       | 19       |
| 10354258      | Uxs1          | 19       | 19       |
| 10354258      | Uxs1          | 19       | 19       |
| 10355514      | Tns1          | 13       | 13       |
| 10355554      | Aamp          | 13       | 13       |
| 10355730      | 1810031K17Rik | 7        | 7        |
| 10356084      | Irs1          | 1        | 1        |
| 10356172      | 5033414K04Rik | 1        | 1        |
| 10356406      | Ngef          | 13       | 13       |
| 10357280      | Insig2        | 1        | 1        |
| 10358607      | Hmcn1         | 19       | 19       |
| 10359190      | Fam20b        | 13       | 13       |
| 10359428      | Aph1a         | 13       | 13       |
| 10359525      | Bat2d         | 1        | 1        |
| 10360391      | Ifi203        | 1        | 1        |
| 10361760      | Timm8a1       | 13       | 13       |
| 10361846      | Reps1         | 7        | 7        |
| 10361926      | Map3k5        | 13       | 13       |
| 10362314      | Ptprk         | 1        | 1        |
| 10363241      | Gcc2          | 7        | 7        |
| 10363372      | Pla2g12b      | 1        | 1        |
| 10363512      | Sar1a         | 13       | 13       |
| 10364518      | Ptbp1         | 7        | 7        |
| 10365116      | Dohh          | 13       | 13       |
| 10365344      | Tcp112        | 7        | 7        |
| 10365769      | Hal           | 1        | 1        |
| 10366707      | Avpr1a        | 1        | 1        |
| 10366956      | Stat6         | 7        | 7        |
| 10366983      | Tmem194       | 7        | 7        |
| 10367337      | Rnf41         | 13       | 13       |
| 10367728      | Map3k7ip2     | 1        | 1        |
| 10367768      |               | 1        | 1        |
| 10368495      |               | 1        | 1        |
| 10368681      | Rfpl4b        | 13       | 13       |
| 10368806      | Smpd2         | 13       | 13       |
| 10369290      | Ddit4         | 19       | 19       |
| 10369290      | Ddit4         | 19       | 19       |
| 10369379      | Slc29a3       | 1        | 1        |
| 10369413      | Sgpl1         | 19       | 19       |
| 10369413      | Sgpl1         | 19       | 19       |
| 10370446      | Trappc10      | 13       | 13       |
| 10371400      | Cry1          | 19       | 19       |
| 10371400      | Cry1          | 19       | 19       |
| 10372844      | Rassf3        | 7        | 7        |
| 10373101      | Pip4k2c       | 7        | 7        |
| 10373197      | Inhbc         | 19       | 19       |
| 10373452      | Gm129         | 13       | 13       |
| 10373890      | Tbc1d10a      | 7        | 7        |
| 10375125      | Ssbp1         | 1        | 1        |
| 10375634      | Mapk9         | 1        | 1        |
| 10376144      | Fnip1         | 7        | 7        |
| 10376733      | Map2k3        | 13       | 13       |
| 10377751      | Asgr1         | 13       | 13       |
| 10377927      | Rnf167        | 7        | 7        |
| 10378385      | Spata22       | 1        | 1        |
| 10379204      | Poldip2       | 13       | 13       |
| 10380560      | Zfp652        | 1        | 1        |
| 10381419      | Nbr1          | 7        | 7        |
| 10382425      | Gprc5c        | 7        | 7        |
| 10383395      | Slc25a10      | 13       | 13       |
| 10383671      | Drg1          | 13       | 13       |
| 10383982      | Znrf3         | 7        | 7        |
| 10384051      | Gck           | 13       | 13       |
| 10384811      | Ccdc104       | 19       | 19       |
| 10384811      | Ccdc104       | 19       | 19       |
| 10385747      | Phf15         | 13       | 13       |
| 10385814      | Leap2         | 19       | 19       |

|          |               |    |    |
|----------|---------------|----|----|
| 10385814 | Leap2         | 19 | 19 |
| 10386219 | Zfp39         | 7  | 7  |
| 10386230 | Rnf187        | 13 | 13 |
| 10386427 | Fln           | 7  | 7  |
| 10386495 |               | 7  | 7  |
| 10386850 | Ncor1         | 1  | 1  |
| 10386934 | Wsb2          | 13 | 13 |
| 10387180 | Ndel1         | 13 | 13 |
| 10387922 | Slc25a11      | 13 | 13 |
| 10388880 | Tmem97        | 13 | 13 |
| 10388938 | Wsb1          | 1  | 1  |
| 10389561 | Dhx40         | 7  | 7  |
| 10390227 | Ube2z         | 7  | 7  |
| 10390574 | Fbxl20        | 7  | 7  |
| 10390691 | Nr1d1         | 7  | 7  |
| 10392484 | Abca8b        | 1  | 1  |
| 10394209 | Dnmt3a        | 7  | 7  |
| 10394448 | Pum2          | 7  | 7  |
| 10394593 | Fam49a        | 1  | 1  |
| 10394627 |               | 1  | 1  |
| 10395259 | Nampt         | 13 | 13 |
| 10396270 | Dact1         | 13 | 13 |
| 10398299 | A1132487      | 7  | 7  |
| 10399478 | Lpin1         | 13 | 13 |
| 10399680 | Cys1          | 13 | 13 |
| 10399801 | Sntg2         | 7  | 7  |
| 10399897 | Hbp1          | 7  | 7  |
| 10401805 | Snw1          | 13 | 13 |
| 10402665 | Cdc42bpb      | 19 | 19 |
| 10402766 | Akt1          | 13 | 13 |
| 10404132 | Cmah          | 1  | 1  |
| 10405781 |               | 13 | 13 |
| 10405894 | Ptdss1        | 13 | 13 |
| 10407307 | Mocs2         | 19 | 19 |
| 10407307 | Mocs2         | 19 | 19 |
| 10409276 |               | 19 | 19 |
| 10409276 |               | 19 | 19 |
| 10410287 | Zfp458        | 1  | 1  |
| 10410302 | E130120F12Rik | 1  | 1  |
| 10412100 | Map3k1        | 1  | 1  |
| 10412298 | Itga1         | 1  | 1  |
| 10413100 | Myst4         | 1  | 1  |
| 10413640 | Nek4          | 1  | 1  |
| 10414211 | Mbl1          | 1  | 1  |
| 10414269 |               | 13 | 13 |
| 10415319 | Irf9          | 7  | 7  |
| 10415574 |               | 1  | 1  |
| 10415725 | Spata13       | 7  | 7  |
| 10416464 | Zc3h13        | 1  | 1  |
| 10417167 | Clybl         | 13 | 13 |
| 10417544 | Acox2         | 1  | 1  |
| 10417734 | Nr1d2         | 7  | 7  |
| 10417869 | Anxa7         | 13 | 13 |
| 10419216 | Gnpnat1       | 7  | 7  |
| 10419240 | Ddhd1         | 1  | 1  |
| 10419288 | Gch1          | 7  | 7  |
| 10419854 | Slc7a8        | 1  | 1  |
| 10420114 | Tgm1          | 13 | 13 |
| 10421197 | Chmp7         | 7  | 7  |
| 10421697 | 9030625A04Rik | 19 | 19 |
| 10423134 | Zfr           | 1  | 1  |
| 10424833 | Maf1          | 7  | 7  |
| 10425302 | Gtpbp1        | 7  | 7  |
| 10425601 | Tef           | 13 | 13 |
| 10427095 | Tenc1         | 7  | 7  |
| 10427744 | Rai14         | 1  | 1  |
| 10428998 | Asap1         | 1  | 1  |
| 10429160 | St3gal1       | 1  | 1  |
| 10430748 | Rangap1       | 13 | 13 |
| 10431558 | Odf3b         | 7  | 7  |
| 10431601 | Arsa          | 7  | 7  |
| 10433057 | Calcoco1      | 7  | 7  |
| 10434094 | Klh22         | 1  | 1  |
| 10434758 | St6gal1       | 7  | 7  |
| 10435162 | Lrch3         | 1  | 1  |
| 10436804 | Mrap          | 19 | 19 |
| 10436804 | Mrap          | 19 | 19 |
| 10436865 | ifngr2        | 7  | 7  |
| 10437451 |               | 7  | 7  |
| 10437992 | Dnm1l         | 1  | 1  |
| 10438769 | Cldn1         | 1  | 1  |
| 10439411 | Nr1i2         | 13 | 13 |
| 10439854 | Bbx           | 1  | 1  |
| 10440238 | Nsun3         | 1  | 1  |

|          |               |    |    |
|----------|---------------|----|----|
| 10443940 | Zfp422-rs1    | 1  | 1  |
| 10444578 |               | 13 | 13 |
| 10444978 | Gnal1         | 13 | 13 |
| 10445442 | Gtpbp2        | 7  | 7  |
| 10445496 | Yipf3         | 7  | 7  |
| 10446063 | Tnfaip8l1     | 7  | 7  |
| 10446986 | Crim1         | 13 | 13 |
| 10447361 | Ttc7          | 13 | 13 |
| 10448195 | 3110048L19Rik | 1  | 1  |
| 10448676 | Slc9a3r2      | 13 | 13 |
| 10449386 | D17Wsu92e     | 13 | 13 |
| 10449452 | Fkbp5         | 13 | 13 |
| 10449999 | Zfp101        | 1  | 1  |
| 10450369 | Hspa1a        | 13 | 13 |
| 10450622 | 2610110G12Rik | 1  | 1  |
| 10451421 | Klhdc3        | 7  | 7  |
| 10451893 | Stap2         | 13 | 13 |
| 10451918 |               | 13 | 13 |
| 10453276 | Thada         | 1  | 1  |
| 10453747 | Colec12       | 19 | 19 |
| 10454063 | Rsl24d1       | 13 | 13 |
| 10454414 | Pik3c3        | 7  | 7  |
| 10454741 | Kdm3b         | 1  | 1  |
| 10455961 | Iigp1         | 7  | 7  |
| 10456254 | Nedd4l        | 1  | 1  |
| 10457508 | Npc1          | 7  | 7  |
| 10457583 |               | 13 | 13 |
| 10457745 | D030074E01Rik | 1  | 1  |
| 10458164 | Cdc23         | 1  | 1  |
| 10458731 | Mcc           | 1  | 1  |
| 10458913 | Cep120        | 7  | 7  |
| 10459772 | Lipg          | 13 | 13 |
| 10460057 |               | 7  | 7  |
| 10460108 | Gnpnat1       | 7  | 7  |
| 10460157 | Cpt1a         | 7  | 7  |
| 10460221 | Chka          | 1  | 1  |
| 10460732 | Znhit2        | 13 | 13 |
| 10461808 | Olf1474       | 13 | 13 |
| 10462091 | Klf9          | 7  | 7  |
| 10464425 | Grk5          | 1  | 1  |
| 10465209 | Mtvr2         | 13 | 13 |
| 10465215 | Mtvr2         | 13 | 13 |
| 10465485 | Esrra         | 13 | 13 |
| 10466304 | Dtx4          | 1  | 1  |
| 10466745 | Tjp2          | 1  | 1  |
| 10467153 | Slc16a12      | 13 | 13 |
| 10467206 | Ppp1r3c       | 1  | 1  |
| 10468762 | 4930506M07Rik | 1  | 1  |
| 10468828 | Eif3a         | 1  | 1  |
| 10470109 | Fbxw5         | 1  | 1  |
| 10470427 | Wdr5          | 13 | 13 |
| 10471912 | Kynu          | 1  | 1  |
| 10471978 | Epc2          | 7  | 7  |
| 10472097 | Fmnl2         | 1  | 1  |
| 10473432 | Tnks1bp1      | 13 | 13 |
| 10473919 |               | 19 | 19 |
| 10473919 |               | 19 | 19 |
| 10476033 | Stk35         | 13 | 13 |
| 10478219 | Plcg1         | 13 | 13 |
| 10481401 | Zer1          | 7  | 7  |
| 10483163 | Grb14         | 7  | 7  |
| 10483410 | Abcb11        | 1  | 1  |
| 10483667 | Cir1          | 7  | 7  |
| 10484389 | Tfpi          | 1  | 1  |
| 10485466 | Cat           | 1  | 1  |
| 10485514 | Caprin1       | 1  | 1  |
| 10486029 | Atpbd4        | 1  | 1  |
| 10486203 | Ino80         | 7  | 7  |
| 10486819 | Catsper2      | 1  | 1  |
| 10488797 | Pxmp4         | 1  | 1  |
| 10489246 | Mafb          | 13 | 13 |
| 10489484 | Sdc4          | 7  | 7  |
| 10490777 | Zfhx4         | 19 | 19 |
| 10490777 | Zfhx4         | 19 | 19 |
| 10490826 | Zbtb10        | 7  | 7  |
| 10491106 | Pld1          | 1  | 1  |
| 10491564 | 4932438A13Rik | 1  | 1  |
| 10491599 | 4932438A13Rik | 1  | 1  |
| 10491605 | 4932438A13Rik | 1  | 1  |
| 10491607 | 4932438A13Rik | 1  | 1  |
| 10491611 | 4932438A13Rik | 1  | 1  |
| 10491613 | 4932438A13Rik | 1  | 1  |
| 10491621 | 4932438A13Rik | 1  | 1  |
| 10491623 | 4932438A13Rik | 1  | 1  |

|          |               |    |    |
|----------|---------------|----|----|
| 10491625 | 4932438A13Rik | 1  | 1  |
| 10491627 | 4932438A13Rik | 1  | 1  |
| 10491629 | 4932438A13Rik | 1  | 1  |
| 10492049 | Fam48a        | 1  | 1  |
| 10492330 | P2ry1         | 13 | 13 |
| 10492689 | Pdgfc         | 1  | 1  |
| 10494001 | Tdpoz4        | 13 | 13 |
| 10494312 | Aph1a         | 13 | 13 |
| 10494832 | Sike1         | 1  | 1  |
| 10495163 | Tmem77        | 1  | 1  |
| 10495685 | Arhgap29      | 1  | 1  |
| 10495873 |               | 13 | 13 |
| 10496023 | Casp6         | 7  | 7  |
| 10496159 | Ints12        | 1  | 1  |
| 10496324 | Slc39a8       | 1  | 1  |
| 10498185 | Tra2b         | 1  | 1  |
| 10498623 | Kpna4         | 1  | 1  |
| 10499108 | Git28d2       | 1  | 1  |
| 10500272 | Gm129         | 13 | 13 |
| 10500545 | Hsd3b5        | 7  | 7  |
| 10500720 | Slc22a15      | 19 | 19 |
| 10500720 | Slc22a15      | 19 | 19 |
| 10501734 | Palmd         | 7  | 7  |
| 10502224 | Sgms2         | 7  | 7  |
| 10502284 | Tet2          | 1  | 1  |
| 10503584 | Coq3          | 7  | 7  |
| 10503711 | Casp8ap2      | 1  | 1  |
| 10504582 | 1300002K09Rik | 1  | 1  |
| 10505270 | Slc31a2       | 1  | 1  |
| 10505461 | Atp6v1g1      | 19 | 19 |
| 10506188 | Pgm2          | 13 | 13 |
| 10506298 | Leprot        | 7  | 7  |
| 10506470 | 1700024P16Rik | 19 | 19 |
| 10506470 | 1700024P16Rik | 19 | 19 |
| 10508454 | Bsdcl1        | 7  | 7  |
| 10508619 | Pum1          | 7  | 7  |
| 10510270 |               | 1  | 1  |
| 10511665 | Necab1        | 7  | 7  |
| 10512640 | Gne           | 13 | 13 |
| 10512766 | Trim14        | 1  | 1  |
| 10514298 | Mrpl48        | 13 | 13 |
| 10515156 | Minpp1        | 13 | 13 |
| 10516064 | Mfsd2         | 13 | 13 |
| 10517328 | Tmem50a       | 13 | 13 |
| 10517345 | Srrm1         | 1  | 1  |
| 10517727 | Klhdc7a       | 7  | 7  |
| 10518069 | Ehd2          | 13 | 13 |
| 10518428 | Clcn6         | 19 | 19 |
| 10518428 | Clcn6         | 19 | 19 |
| 10519659 | Anapc5        | 13 | 13 |
| 10519691 | Anapc5        | 13 | 13 |
| 10520048 | Mli5          | 1  | 1  |
| 10521174 | Rnf4          | 7  | 7  |
| 10521702 | 4930431F12Rik | 19 | 19 |
| 10521702 | 4930431F12Rik | 19 | 19 |
| 10522802 | Ythdc1        | 1  | 1  |
| 10524034 | Idua          | 1  | 1  |
| 10524941 | Fbxo21        | 7  | 7  |
| 10525086 | Slc24a6       | 7  | 7  |
| 10525296 | Brap          | 7  | 7  |
| 10525893 | Aacs          | 13 | 13 |
| 10526356 | Rhbdd2        | 13 | 13 |
| 10526363 | Por           | 13 | 13 |
| 10526842 | Zfp157        | 19 | 19 |
| 10526842 | Zfp157        | 19 | 19 |
| 10527133 | Wipi2         | 13 | 13 |
| 10527475 | Zfp655        | 7  | 7  |
| 10527528 | Smarce1       | 1  | 1  |
| 10528723 | Mli3          | 1  | 1  |
| 10529758 | Bod1l         | 1  | 1  |
| 10530733 | Clock         | 1  | 1  |
| 10531323 | G3bp2         | 1  | 1  |
| 10531529 | Cnot6l        | 7  | 7  |
| 10531707 | Lin54         | 7  | 7  |
| 10532133 | Evi5          | 1  | 1  |
| 10532944 | Mlec          | 1  | 1  |
| 10533285 | Ptprn11       | 13 | 13 |
| 10535866 | Ubl3          | 13 | 13 |
| 10537292 | 1810058I24Rik | 13 | 13 |
| 10539111 | Tmem150       | 19 | 19 |
| 10539111 | Tmem150       | 19 | 19 |
| 10539486 | Zfml          | 1  | 1  |
| 10539653 | Tprkb         | 7  | 7  |
| 10540248 | Mitf          | 1  | 1  |

|          |               |    |    |
|----------|---------------|----|----|
| 10540812 | Tatdn2        | 13 | 13 |
| 10541307 | Usp18         | 7  | 7  |
| 10541446 | Cpamd8        | 19 | 19 |
| 10541446 | Cpamd8        | 19 | 19 |
| 10541545 | Necap1        | 7  | 7  |
| 10541711 | Phb2          | 13 | 13 |
| 10542112 | Clec2h        | 7  | 7  |
| 10542200 | Gabarrapl1    | 7  | 7  |
| 10542477 | Pik3c2g       | 19 | 19 |
| 10542477 | Pik3c2g       | 19 | 19 |
| 10542522 | Plekha5       | 1  | 1  |
| 10543879 | Wdr91         | 1  | 1  |
| 10544089 | Zc3hav1       | 7  | 7  |
| 10545065 | Gprin3        | 7  | 7  |
| 10545308 | Kdm3a         | 7  | 7  |
| 10545697 | Dguok         | 7  | 7  |
| 10546450 | Adamts9       | 1  | 1  |
| 10547521 | Atp6v1e1      | 13 | 13 |
| 10548735 | Dusp16        | 1  | 1  |
| 10551162 | Atp5sl        | 13 | 13 |
| 10551173 | Exosc5        | 13 | 13 |
| 10551226 | Cyp2a4        | 13 | 13 |
| 10551250 |               | 19 | 19 |
| 10551250 |               | 19 | 19 |
| 10551282 |               | 13 | 13 |
| 10553092 | Dbp           | 7  | 7  |
| 10554569 | Fam103a1      | 13 | 13 |
| 10554714 | Olfir291      | 13 | 13 |
| 10556169 | Eif3f         | 13 | 13 |
| 10556463 | Arntl         | 1  | 1  |
| 10558707 | Ric8          | 13 | 13 |
| 10558723 | Psmd13        | 13 | 13 |
| 10558921 | Pnpla2        | 7  | 7  |
| 10558961 | Tspan4        | 13 | 13 |
| 10560015 | Rnf141        | 1  | 1  |
| 10560709 | Pvr           | 7  | 7  |
| 10561008 | Ceacam1       | 1  | 1  |
| 10561063 | Bckdha        | 13 | 13 |
| 10562911 | Tbc1d17       | 7  | 7  |
| 10563130 | Aldh16a1      | 7  | 7  |
| 10564343 | Tjp1          | 7  | 7  |
| 10564736 | Polg          | 7  | 7  |
| 10565156 | Homer2        | 13 | 13 |
| 10565341 | Gm6155        | 13 | 13 |
| 10565775 | Dgat2         | 13 | 13 |
| 10565846 | Spcs2         | 1  | 1  |
| 10566926 | Rnf141        | 1  | 1  |
| 10567335 | Gde1          | 13 | 13 |
| 10568050 | Aldoa         | 13 | 13 |
| 10568115 | Mvp           | 13 | 13 |
| 10568436 |               | 7  | 7  |
| 10568785 | Bnip3         | 13 | 13 |
| 10569646 | Ccnd1         | 13 | 13 |
| 10569786 | Pnpla6        | 19 | 19 |
| 10569786 | Pnpla6        | 19 | 19 |
| 10569953 | Snapc2        | 7  | 7  |
| 10570982 | Fgfr1         | 13 | 13 |
| 10571444 | Slc7a2        | 7  | 7  |
| 10571530 |               | 1  | 1  |
| 10571567 | Sorbs2        | 1  | 1  |
| 10572130 | Lpl           | 1  | 1  |
| 10573483 | Prdx2         | 13 | 13 |
| 10574404 | Setd6         | 13 | 13 |
| 10575029 | 6030452D12Rik | 1  | 1  |
| 10575867 | Mlycd         | 7  | 7  |
| 10576152 | Trappc2l      | 13 | 13 |
| 10576258 | Cdk10         | 13 | 13 |
| 10576610 | Pard3         | 7  | 7  |
| 10576719 |               | 1  | 1  |
| 10577604 | Agpat6        | 13 | 13 |
| 10579181 | Rfxank        | 1  | 1  |
| 10580056 | Lphn1         | 19 | 19 |
| 10580056 | Lphn1         | 19 | 19 |
| 10580807 | Kifc3         | 19 | 19 |
| 10580875 | Gtl3          | 7  | 7  |
| 10581340 | Ranbp10       | 7  | 7  |
| 10581560 | Psm7          | 1  | 1  |
| 10581625 | 2400003C14Rik | 13 | 13 |
| 10582069 | Sdr42e1       | 7  | 7  |
| 10582231 | Fbxo31        | 13 | 13 |
| 10583573 | Atg4d         | 13 | 13 |
| 10584634 | Usp2          | 13 | 13 |
| 10584758 |               | 13 | 13 |
| 10584803 | 1500035H01Rik | 7  | 7  |

|                |               |          |          |
|----------------|---------------|----------|----------|
| 10585417       | Idh3a         | 13       | 13       |
| 10585467       | C630028N24Rik | 7        | 7        |
| 10586074       |               | 19       | 19       |
| 10586074       |               | 19       | 19       |
| 10586368       | Clpx          | 1        | 1        |
| 10586724       | Narg2         | 1        | 1        |
| 10587042       | Rs124d1       | 13       | 13       |
| 10588243       | Ryk           | 13       | 13       |
| 10588429       | Pik3r4        | 7        | 7        |
| 10588691       | Hyal1         | 1        | 1        |
| 10589087       | Prkar2a       | 19       | 19       |
| 10589087       | Prkar2a       | 19       | 19       |
| 10590438       | C730027P07Rik | 1        | 1        |
| 10590635       | Ccr5          | 1        | 1        |
| 10591263       | Fbxl12        | 1        | 1        |
| 10591668       | Rgl3          | 1        | 1        |
| 10592237       | Ei24          | 1        | 1        |
| 10592289       | Ccdc15        | 19       | 19       |
| 10592289       | Ccdc15        | 19       | 19       |
| 10593966       | Csk           | 7        | 7        |
| 10596318       | Nudt16        | 7        | 7        |
| 10597531       | Rbms3         | 1        | 1        |
| 10597758       | Csrnp1        | 13       | 13       |
| 10598013       | Ccr5          | 1        | 1        |
| 10598456       | Otud5         | 7        | 7        |
| 10598586       | Xk            | 1        | 1        |
| 10598798       | Kdm6a         | 1        | 1        |
| 10599032       | Wdr44         | 1        | 1        |
| 10599192       | Lonrf3        | 19       | 19       |
| 10599192       | Lonrf3        | 19       | 19       |
| 10601099       | Med12         | 1        | 1        |
| 10601192       | Taf1          | 1        | 1        |
| 10601303       |               | 1        | 1        |
| 10601588       | 3110007F17Rik | 7        | 7        |
| 10601819       | Armcx5        | 1        | 1        |
| 10602454       | Fam120c       | 1        | 1        |
| 10602827       | A830080D01Rik | 1        | 1        |
| 10607774       | Mospd2        | 1        | 1        |
|                |               |          |          |
| Liver Class II |               |          |          |
| Probe ID       | Gene ID       | Con Peak | TSR Peak |
| 10344713       |               | 19       | 13       |
| 10345206       |               | 19       | 13       |
| 10346303       | Hspe1         | 19       | 13       |
| 10347564       | Dnajb2        | 1        | 7        |
| 10348321       | Dgkd          | 7        | 13       |
| 10349316       | Tmem185b      | 13       | 7        |
| 10349752       | Elk4          | 7        | 1        |
| 10350349       | Dennd1b       | 7        | 1        |
| 10350792       | Tor1aip1      | 1        | 7        |
| 10351224       | F5            | 13       | 1        |
| 10351269       | 4930455F23Rik | 1        | 7        |
| 10351852       | Crp           | 19       | 1        |
| 10352119       | Pppde1        | 19       | 1        |
| 10352125       | Gm9982        | 19       | 1        |
| 10352867       | Ptxna2        | 1        | 19       |
| 10353181       | Lactb2        | 1        | 7        |
| 10353346       | Pkhd1         | 7        | 1        |
| 10353849       | 4632411B12Rik | 7        | 13       |
| 10355532       | Tns1          | 19       | 13       |
| 10355567       | Tmbim1        | 7        | 13       |
| 10356001       | Cul3          | 7        | 1        |
| 10356593       | Hes6          | 13       | 19       |
| 10356601       | Per2          | 13       | 19       |
| 10356859       | Dtymk         | 19       | 1        |
| 10357239       | Tmem37        | 13       | 19       |
| 10357454       | Dars          | 7        | 1        |
| 10357579       | Mapkapk2      | 1        | 13       |
| 10357630       | Srgap2        | 7        | 19       |
| 10358454       | Rbm3          | 13       | 1        |
| 10359571       | Fmo1          | 13       | 19       |
| 10360415       | Grem2         | 13       | 7        |
| 10360589       | Ahctf1        | 19       | 1        |
| 10361104       | Ppp2r5a       | 7        | 19       |
| 10361869       | Nhs1          | 1        | 7        |
| 10361979       | Bclaf1        | 7        | 1        |
| 10362052       | Alh8a1        | 7        | 19       |
| 10362171       | Stx7          | 19       | 1        |
| 10362210       | Med23         | 7        | 1        |
| 10362379       | Echdc1        | 19       | 1        |
| 10362803       | Cd164         | 7        | 1        |
| 10363281       | Ranbp2        | 13       | 1        |
| 10363522       | Tysnd1        | 19       | 13       |
| 10363706       | Jmjd1c        | 1        | 19       |

|          |               |    |    |
|----------|---------------|----|----|
| 10364049 |               | 7  | 19 |
| 10364683 | Stk11         | 7  | 13 |
| 10365302 | A230046K03Rik | 19 | 1  |
| 10365545 | Pah           | 19 | 13 |
| 10365658 | Uhrf1bp1l     | 13 | 1  |
| 10365974 | Dcn           | 1  | 19 |
| 10366238 | Ppp1r12a      | 7  | 1  |
| 10367224 | Stat2         | 1  | 19 |
| 10367600 | Esr1          | 13 | 19 |
| 10367816 |               | 19 | 1  |
| 10368289 | Enpp1         | 13 | 19 |
| 10368317 | Enpp3         | 7  | 1  |
| 10368700 | BC021785      | 19 | 1  |
| 10368888 | Foxo3         | 13 | 7  |
| 10369909 |               | 1  | 19 |
| 10370376 | Pfkl          | 19 | 13 |
| 10370931 | Mknk2         | 13 | 7  |
| 10371356 | Appl2         | 7  | 1  |
| 10371506 | Stab2         | 1  | 19 |
| 10371830 | Actr6         | 7  | 1  |
| 10371970 | Amdhd1        | 1  | 7  |
| 10372177 | Tmtc2         | 7  | 13 |
| 10372457 | Tbc1d15       | 7  | 1  |
| 10372503 | Lgr5          | 7  | 1  |
| 10372618 | Frs2          | 7  | 1  |
| 10372656 | Cpsf6         | 7  | 1  |
| 10372988 | Slc16a7       | 13 | 19 |
| 10373223 | Lrp1          | 7  | 13 |
| 10374455 | Spred2        | 1  | 7  |
| 10374590 | Xpo1          | 19 | 1  |
| 10375002 | Cpeb4         | 7  | 1  |
| 10375529 | Zfp62         | 19 | 1  |
| 10375820 | Clk4          | 7  | 1  |
| 10376163 | Rapgef6       | 7  | 1  |
| 10378914 | Myo18a        | 13 | 7  |
| 10379262 | NF1           | 7  | 1  |
| 10379445 | Zfp207        | 7  | 1  |
| 10379779 | Ddx52         | 7  | 1  |
| 10380534 | Spop          | 19 | 1  |
| 10380840 | Crkr5         | 7  | 1  |
| 10381172 | Stat5a        | 1  | 19 |
| 10382152 | Helz          | 7  | 1  |
| 10382271 | Arsg          | 7  | 1  |
| 10383758 | Tug1          | 7  | 1  |
| 10384572 | 1110067D22Rik | 1  | 19 |
| 10385325 | Pttg1         | 7  | 13 |
| 10385353 | Adra1b        | 1  | 19 |
| 10385822 | Gm10447       | 19 | 1  |
| 10386473 | Sreb1         | 13 | 19 |
| 10386624 | Tmem11        | 7  | 13 |
| 10387557 |               | 19 | 13 |
| 10388377 | Srr           | 19 | 1  |
| 10388451 | Wdr81         | 1  | 7  |
| 10389797 | Stxbp4        | 19 | 1  |
| 10390454 | E130012A19Rik | 19 | 13 |
| 10391286 | Stat5b        | 1  | 7  |
| 10391828 | C1q1l         | 19 | 13 |
| 10392318 | Bptf          | 7  | 1  |
| 10392440 | Slc16a6       | 19 | 1  |
| 10392601 | Abca6         | 7  | 1  |
| 10392856 | Nat9          | 19 | 13 |
| 10392894 | Fads6         | 7  | 13 |
| 10393431 | Tk1           | 13 | 19 |
| 10393904 | Notum         | 7  | 13 |
| 10394173 | Asxl2         | 7  | 1  |
| 10394288 | Itsn2         | 7  | 1  |
| 10394783 | 1700030C10Rik | 19 | 1  |
| 10394786 | 1700030C10Rik | 19 | 1  |
| 10396346 | 1810048J11Rik | 7  | 19 |
| 10396740 | Gphn          | 7  | 1  |
| 10396950 |               | 19 | 13 |
| 10397085 | Rbm25         | 13 | 19 |
| 10397518 | Ahsa1         | 19 | 13 |
| 10398288 | Yy1           | 7  | 13 |
| 10398578 | Tecpr2        | 19 | 1  |
| 10398881 | Gm5188        | 19 | 13 |
| 10399265 | Ncoa1         | 7  | 1  |
| 10399354 |               | 19 | 1  |
| 10400006 | Ahr           | 7  | 1  |
| 10400718 | Sos2          | 7  | 1  |
| 10401289 | Slc10a1       | 7  | 1  |
| 10401616 | Mlh3          | 19 | 1  |
| 10402211 | Fbln5         | 1  | 7  |
| 10402368 | Serpina6      | 13 | 19 |

|          |               |    |    |
|----------|---------------|----|----|
| 10402473 | Clmn          | 13 | 7  |
| 10402542 | Atg2b         | 7  | 1  |
| 10403558 | Ero1lb        | 19 | 1  |
| 10403955 | Hist1h2ao     | 1  | 13 |
| 10404045 | Hist1h2ad     | 1  | 13 |
| 10404178 | BC005537      | 19 | 13 |
| 10404612 | Rreb1         | 7  | 1  |
| 10405911 | Zfp759        | 19 | 1  |
| 10406482 | Ccnh          | 19 | 1  |
| 10406614 | Mtx3          | 7  | 1  |
| 10406681 | Ap3b1         | 7  | 1  |
| 10406718 | Wdr41         | 7  | 1  |
| 10407370 | 4833420G17Rik | 7  | 1  |
| 10407993 | Fusip1        | 19 | 1  |
| 10408111 | Hist1h2ao     | 19 | 13 |
| 10408162 | Zfp322a       | 19 | 1  |
| 10408251 | Slc17a4       | 1  | 7  |
| 10408348 | Mrs2          | 7  | 19 |
| 10408629 | 1300014I06Rik | 1  | 19 |
| 10408656 | Peci          | 7  | 13 |
| 10408915 | Dtnbp1        | 7  | 13 |
| 10409204 | Gm10784       | 19 | 13 |
| 10410273 | Zfp708        | 19 | 1  |
| 10410364 | 6720487G11Rik | 7  | 1  |
| 10410386 | E430024C06Rik | 19 | 1  |
| 10410388 | E430024C06Rik | 19 | 1  |
| 10410617 | Pdcd6         | 7  | 13 |
| 10410644 | Zfp72         | 19 | 1  |
| 10411899 | 2410002O22Rik | 19 | 1  |
| 10412607 | Abhd6         | 13 | 19 |
| 10413981 | Gm626         | 19 | 13 |
| 10414449 | Mudeng        | 7  | 1  |
| 10415052 | Mmp14         | 1  | 19 |
| 10415911 | Kif13b        | 19 | 1  |
| 10417124 | B930095G15Rik | 7  | 1  |
| 10418251 | App1          | 19 | 1  |
| 10419223 | Fermt2        | 1  | 19 |
| 10420390 | Xpo4          | 13 | 1  |
| 10420497 | Gm6907        | 13 | 1  |
| 10421672 | 1200011I18Rik | 7  | 1  |
| 10422194 | Rbm26         | 7  | 1  |
| 10423740 |               | 7  | 13 |
| 10423921 | Oxr1          | 7  | 1  |
| 10424113 | Mal2          | 19 | 1  |
| 10424467 | Phf201        | 13 | 1  |
| 10424929 | Adck5         | 1  | 7  |
| 10425207 | H1f0          | 1  | 7  |
| 10426169 | 1300018J18Rik | 7  | 13 |
| 10426921 | Dazap2        | 7  | 1  |
| 10427235 | Prr13         | 19 | 7  |
| 10427454 | Card6         | 1  | 7  |
| 10427772 | Tars          | 19 | 1  |
| 10428103 | Stk3          | 7  | 1  |
| 10428619 | Enpp2         | 13 | 19 |
| 10430649 | Cbx7          | 7  | 13 |
| 10431856 | Sfrs2ip       | 7  | 1  |
| 10433114 | Iiga5         | 1  | 19 |
| 10433311 | Mgrn1         | 7  | 13 |
| 10433633 | Mkl2          | 19 | 1  |
| 10433660 | Bfar          | 7  | 1  |
| 10433910 | Top3b         | 1  | 19 |
| 10434668 | Tmem97        | 13 | 19 |
| 10435489 | Ccdc58        | 7  | 1  |
| 10436209 | Cblb          | 7  | 1  |
| 10436678 | Gabpa         | 7  | 1  |
| 10436873 | Son           | 7  | 1  |
| 10437224 | Mx2           | 7  | 1  |
| 10437236 | B230307C23Rik | 19 | 1  |
| 10437330 | Crebbp        | 1  | 7  |
| 10437664 | Dexi          | 1  | 19 |
| 10437778 | Parn          | 7  | 1  |
| 10438340 | Comt1         | 1  | 7  |
| 10439762 | Ahcy          | 19 | 13 |
| 10440770 | Sfrs15        | 7  | 1  |
| 10441787 |               | 7  | 1  |
| 10442224 | BC049807      | 19 | 1  |
| 10442341 | Srrm2         | 7  | 1  |
| 10442625 | Igfals        | 19 | 13 |
| 10443786 | Pde9a         | 1  | 19 |
| 10444244 | Tap1          | 1  | 7  |
| 10445607 | Pex6          | 7  | 13 |
| 10448424 | Pdpc1         | 7  | 1  |
| 10448506 |               | 19 | 1  |
| 10449225 | Decr2         | 7  | 13 |



|          |               |    |    |
|----------|---------------|----|----|
| 10449327 | Lemd2         | 7  | 13 |
| 10449926 | Zfp799        | 19 | 1  |
| 10450206 | Rnf5          | 19 | 13 |
| 10450605 | Tubb5         | 1  | 7  |
| 10453026 | Prkd3         | 7  | 1  |
| 10453461 | Fbxo11        | 7  | 1  |
| 10453544 | Mettl4        | 1  | 7  |
| 10453636 | Svil          | 1  | 19 |
| 10453759 | Gm10554       | 19 | 1  |
| 10454105 | Dsg1c         | 13 | 19 |
| 10454398 | AW554918      | 7  | 1  |
| 10454447 | Sap130        | 7  | 1  |
| 10454546 | Map3k2        | 7  | 1  |
| 10454782 | Egr1          | 1  | 7  |
| 10455588 |               | 19 | 13 |
| 10455852 | Prrc1         | 1  | 7  |
| 10456296 | Malt1         | 7  | 19 |
| 10457465 | Esco1         | 7  | 1  |
| 10457780 | Fam59a        | 13 | 7  |
| 10458098 | Fam13b        | 19 | 1  |
| 10458843 | Sema6a        | 1  | 19 |
| 10460544 | Yif1a         | 13 | 7  |
| 10460591 | Fibp          | 7  | 13 |
| 10461568 | Prpf19        | 7  | 13 |
| 10461844 | Gnaq          | 7  | 1  |
| 10461979 | Aldh1a1       | 19 | 1  |
| 10462504 | Minpp1        | 7  | 13 |
| 10463121 | Zfp518        | 19 | 1  |
| 10463209 | 4933411K16Rik | 7  | 19 |
| 10463224 | Marveld1      | 13 | 19 |
| 10464070 | Vti1a         | 7  | 19 |
| 10464084 | Tcf7l2        | 7  | 1  |
| 10464415 | Fam45a        | 19 | 1  |
| 10464560 | Aldh3b1       | 19 | 13 |
| 10464572 | Ndufv1        | 19 | 13 |
| 10465314 | Capn1         | 13 | 7  |
| 10465474 | Prdx5         | 19 | 13 |
| 10466288 | Olfir1428     | 19 | 13 |
| 10466976 | Gldc          | 19 | 1  |
| 10467368 | Ctdspl2       | 7  | 1  |
| 10468253 | Nt5c2         | 13 | 19 |
| 10468311 | Sh3pxd2a      | 7  | 1  |
| 10468885 | Zfp826        | 19 | 1  |
| 10468949 | Dclre1c       | 7  | 1  |
| 10469335 | Stam          | 7  | 1  |
| 10469425 | Arl5b         | 13 | 1  |
| 10469475 | Mllt10        | 7  | 1  |
| 10469772 |               | 7  | 1  |
| 10469867 | Pnpla7        | 1  | 7  |
| 10471256 | Nup214        | 7  | 1  |
| 10472162 | Gpd2          | 7  | 1  |
| 10472538 | Dhrs9         | 1  | 7  |
| 10473473 | Olfir1022     | 19 | 13 |
| 10473582 | Olfir1161     | 1  | 13 |
| 10473690 | Fnbp4         | 7  | 1  |
| 10473981 | Ambra1        | 7  | 1  |
| 10474006 | Phf21a        | 1  | 19 |
| 10475335 | Pdia3         | 19 | 1  |
| 10475405 | Eif3j         | 19 | 1  |
| 10476314 | Prnp          | 19 | 13 |
| 10476349 | 1110034G24Rik | 13 | 7  |
| 10476834 | Xrn2          | 7  | 1  |
| 10477649 | Acsc2         | 1  | 19 |
| 10477815 | Phf20         | 19 | 13 |
| 10478447 | Stk4          | 1  | 7  |
| 10478938 | Hax1          | 19 | 7  |
| 10479047 | Pck1          | 13 | 7  |
| 10479182 |               | 19 | 1  |
| 10479189 | Gm14434       | 19 | 1  |
| 10479192 |               | 19 | 1  |
| 10479195 |               | 19 | 1  |
| 10479198 | Gm14434       | 19 | 1  |
| 10479902 | Dhtkd1        | 7  | 19 |
| 10480258 | Nsun6         | 7  | 1  |
| 10480329 | Dnajc1        | 19 | 1  |
| 10480725 | BC029214      | 1  | 19 |
| 10481525 | Tor1a         | 7  | 13 |
| 10482330 | Atp6v1g1      | 19 | 13 |
| 10482448 | Zeb2          | 1  | 19 |
| 10482868 | Wdsub1        | 7  | 13 |
| 10482880 | Baz2b         | 7  | 1  |
| 10483819 | Ttc30b        | 1  | 7  |
| 10483822 | Ttc30a2       | 1  | 7  |
| 10484402 | Ctnnd1        | 7  | 1  |

|          |                    |    |    |
|----------|--------------------|----|----|
| 10485357 |                    | 19 | 13 |
| 10485656 | Elp4               | 19 | 1  |
| 10487011 | Gatm               | 1  | 19 |
| 10487277 | Trpm7              | 7  | 1  |
| 10487945 | Prei4              | 13 | 7  |
| 10488322 | A230067G21Rik      | 7  | 1  |
| 10488469 | Btbd1              | 19 | 1  |
| 10488816 | Ahcy               | 19 | 13 |
| 10490259 | Gm14434            | 19 | 1  |
| 10490262 | Gm14434            | 19 | 1  |
| 10490265 | Gm14391            | 19 | 1  |
| 10490268 | Gm14434            | 19 | 1  |
| 10490273 | 100043387,00000000 | 19 | 1  |
| 10490291 | Gm14434            | 19 | 1  |
| 10490690 | Uckl1              | 7  | 1  |
| 10491597 | 4932438A13Rik      | 1  | 19 |
| 10491601 | 4932438A13Rik      | 19 | 1  |
| 10491603 | 4932438A13Rik      | 19 | 1  |
| 10491609 | 4932438A13Rik      | 19 | 1  |
| 10491615 | 4932438A13Rik      | 19 | 1  |
| 10491617 | 4932438A13Rik      | 19 | 1  |
| 10491619 | 4932438A13Rik      | 19 | 1  |
| 10492709 | Accn5              | 19 | 13 |
| 10493292 | 2810403A07Rik      | 7  | 1  |
| 10493798 | S100a16            | 19 | 13 |
| 10494536 | Pdzk1              | 19 | 13 |
| 10496727 | Ddah1              | 1  | 7  |
| 10498319 | Serp1              | 19 | 1  |
| 10498477 | E130311K13Rik      | 1  | 7  |
| 10499045 | Trim2              | 1  | 19 |
| 10499128 | Rnu73a             | 7  | 19 |
| 10499716 | Ubp2l              | 7  | 1  |
| 10500610 | Fam46c             | 13 | 7  |
| 10501567 | Rnpc3              | 7  | 1  |
| 10501586 | S1pr1              | 1  | 19 |
| 10501699 | Agl                | 7  | 19 |
| 10501778 | Ptbp2              | 7  | 1  |
| 10501795 | Rwdd3              | 1  | 19 |
| 10503036 | Sfrs11             | 7  | 1  |
| 10503359 | C430048L16Rik      | 19 | 1  |
| 10503363 | Rbm12b             | 19 | 1  |
| 10503926 | Rars2              | 7  | 1  |
| 10504127 | Ccl21a             | 19 | 7  |
| 10504154 | Ccl21a             | 19 | 7  |
| 10504183 | Ccl21a             | 19 | 7  |
| 10504755 |                    | 19 | 13 |
| 10505008 | Slc44a1            | 1  | 19 |
| 10505028 | Slc44a1            | 19 | 1  |
| 10505044 | Fktn               | 19 | 1  |
| 10508392 | Rnf19b             | 13 | 7  |
| 10509063 | Il22ra1            | 7  | 19 |
| 10509441 | Ece1               | 7  | 19 |
| 10509601 | Tmco4              | 7  | 13 |
| 10510129 | Dhrs3              | 1  | 7  |
| 10510172 | LOC100041490       | 1  | 7  |
| 10510256 | 2510039O18Rik      | 7  | 13 |
| 10510624 | Klh21              | 7  | 13 |
| 10511935 | Pnrc1              | 1  | 19 |
| 10512308 | Sigmar1            | 1  | 19 |
| 10512377 | Ccl21a             | 19 | 7  |
| 10512886 | Acnat2             | 1  | 19 |
| 10512892 | Acnat1             | 19 | 1  |
| 10513362 | Gm12528            | 13 | 19 |
| 10513551 | Fkbp15             | 7  | 1  |
| 10513884 | Tle1               | 7  | 1  |
| 10514791 | Pcsk9              | 13 | 19 |
| 10516296 | Thrap3             | 7  | 1  |
| 10516994 | Fam76a             | 13 | 7  |
| 10517421 | Pnrc2              | 19 | 1  |
| 10517689 | Pqlc2              | 7  | 1  |
| 10518350 |                    | 1  | 7  |
| 10518352 |                    | 1  | 7  |
| 10518743 | H6pd               | 1  | 7  |
| 10519324 | Cdk6               | 7  | 1  |
| 10519951 | Pion               | 7  | 1  |
| 10520010 | Pmpcb              | 19 | 13 |
| 10520483 | D5Wsu178e          | 19 | 1  |
| 10521057 | Maea               | 1  | 13 |
| 10521068 | 4933407H18Rik      | 7  | 1  |
| 10521222 | Add1               | 1  | 7  |
| 10522160 | N4bp2              | 13 | 7  |
| 10523021 | Slc4a4             | 7  | 1  |
| 10523579 | Arhgap24           | 19 | 1  |
| 10524079 |                    | 19 | 1  |

|          |               |    |    |
|----------|---------------|----|----|
| 10524082 | 2310001H12Rik | 19 | 1  |
| 10524369 | Hps4          | 1  | 7  |
| 10525111 | Ddx54         | 7  | 13 |
| 10525718 |               | 19 | 13 |
| 10526482 | Polr2j        | 7  | 13 |
| 10527327 | Bri3          | 13 | 7  |
| 10527575 | Pan3          | 7  | 1  |
| 10528457 | Orc5l         | 7  | 1  |
| 10529093 | Gtf3c2        | 7  | 1  |
| 10529226 | Rbks          | 13 | 19 |
| 10530225 | Pds5a         | 7  | 1  |
| 10530492 | Nfxl1         | 13 | 1  |
| 10531066 | Ugt2a3        | 19 | 1  |
| 10531183 | Adamts3       | 19 | 13 |
| 10531215 | Ankrd17       | 7  | 1  |
| 10532301 |               | 19 | 1  |
| 10532305 | 4930522L14Rik | 19 | 1  |
| 10532310 | 4930522L14Rik | 19 | 1  |
| 10532582 | Myo18b        | 19 | 13 |
| 10534842 | Gnb2          | 7  | 13 |
| 10535739 | Usp12         | 19 | 13 |
| 10535759 | Lnx2          | 1  | 19 |
| 10535894 | Hmgb1         | 7  | 1  |
| 10535956 | Stard13       | 1  | 19 |
| 10536635 | A430107O13Rik | 7  | 1  |
| 10536818 | Calu          | 19 | 1  |
| 10537102 | Exoc4         | 7  | 1  |
| 10537375 | Ubn2          | 7  | 1  |
| 10538253 | Mpp6          | 19 | 1  |
| 10538269 |               | 19 | 1  |
| 10538459 | Aqp1          | 7  | 13 |
| 10538526 | Avl9          | 1  | 7  |
| 10539104 | 0610030E20Rik | 1  | 7  |
| 10539606 | Cct7          | 19 | 13 |
| 10539894 | Mgll          | 13 | 19 |
| 10540493 | Edem1         | 19 | 1  |
| 10540554 | Setd5         | 7  | 1  |
| 10540727 | Crelf1        | 19 | 7  |
| 10541216 | Kdm5a         | 7  | 1  |
| 10541441 | Gm10319       | 1  | 19 |
| 10542172 | Clec1b        | 7  | 1  |
| 10542378 | Atf7ip        | 1  | 7  |
| 10542615 | Slco1b2       | 7  | 1  |
| 10542885 | 2810474O19Rik | 7  | 1  |
| 10542959 | Bet1          | 19 | 1  |
| 10543017 | Pdk4          | 1  | 19 |
| 10543551 | Rbm28         | 19 | 1  |
| 10543785 | AB041803      | 7  | 1  |
| 10544885 | Fkbp14        | 19 | 1  |
| 10545409 | Vamp8         | 7  | 13 |
| 10547404 | Erc1          | 19 | 7  |
| 10547410 | Erc1          | 19 | 1  |
| 10548030 | Cd9           | 1  | 7  |
| 10548697 |               | 19 | 13 |
| 10548996 | Slco1a4       | 7  | 1  |
| 10549256 | Kras          | 19 | 1  |
| 10550003 | Zfp606        | 19 | 1  |
| 10551752 | 4932431P20Rik | 19 | 13 |
| 10552353 |               | 19 | 1  |
| 10552418 | Etfb          | 19 | 13 |
| 10553354 | Nav2          | 7  | 19 |
| 10555087 |               | 7  | 19 |
| 10555758 | Olfr582       | 19 | 13 |
| 10555875 | Olfr653       | 19 | 13 |
| 10556113 | Rbm3          | 13 | 1  |
| 10556242 |               | 13 | 1  |
| 10556381 |               | 1  | 19 |
| 10556487 | A630005I04Rik | 1  | 19 |
| 10556528 | Pde3b         | 19 | 1  |
| 10556701 | Acsm5         | 7  | 19 |
| 10557206 | Rbbp6         | 7  | 1  |
| 10557211 | Rbbp6         | 7  | 1  |
| 10557233 | Tnrc6a        | 7  | 1  |
| 10557831 | Myst1         | 19 | 13 |
| 10559333 | Shank2        | 1  | 19 |
| 10559341 | Shank2        | 1  | 19 |
| 10560131 | 2810007J24Rik | 7  | 1  |
| 10560181 | Gltscr2       | 7  | 13 |
| 10560532 | Lrrc68        | 13 | 7  |
| 10562605 | AI987944      | 7  | 1  |
| 10563770 | Csrp3         | 7  | 13 |
| 10563895 |               | 19 | 7  |
| 10564451 | Mef2a         | 7  | 1  |
| 10564467 | Lrrc28        | 13 | 19 |

|                 |               |          |          |
|-----------------|---------------|----------|----------|
| 10565178        | Btbd1         | 19       | 1        |
| 10565479        | I7Rn6         | 19       | 7        |
| 10565609        | Thrsp         | 13       | 19       |
| 10565738        | 2210018M11Rik | 7        | 1        |
| 10566132        | Rhog          | 1        | 7        |
| 10567743        | Nsmce1        | 1        | 13       |
| 10569024        | Sigirr        | 19       | 13       |
| 10569848        | Stxbp2        | 7        | 13       |
| 10570291        | F10           | 19       | 13       |
| 10571266        | Ppp2cb        | 7        | 13       |
| 10572146        | Atp6v1b2      | 1        | 7        |
| 10572733        | BC049349      | 7        | 1        |
| 10573867        | Rbl2          | 7        | 1        |
| 10575153        | Cyb5b         | 19       | 1        |
| 10575873        | Osgin1        | 1        | 7        |
| 10576598        | 1810063B05Rik | 13       | 19       |
| 10578264        | Msr1          | 1        | 19       |
| 10578955        |               | 7        | 19       |
| 10579799        | Tmem184c      | 19       | 1        |
| 10580771        | Ciapin1       | 13       | 19       |
| 10580955        |               | 1        | 19       |
| 10582006        | LOC100048095  | 19       | 13       |
| 10582474        | Chmp1a        | 7        | 13       |
| 10582882        |               | 19       | 13       |
| 10582888        |               | 19       | 13       |
| 10582916        |               | 19       | 13       |
| 10583242        | Sesn3         | 1        | 7        |
| 10583314        | Taf1d         | 7        | 1        |
| 10583485        | A230050P20Rik | 1        | 19       |
| 10585358        | Npat          | 7        | 1        |
| 10585572        | Hmg20a        | 7        | 1        |
| 10585874        | Hexa          | 7        | 13       |
| 10586920        | Rfx7          | 1        | 19       |
| 10587266        | Gclc          | 1        | 19       |
| 10587558        | Dopey1        | 7        | 1        |
| 10587639        | Nt5e          | 1        | 19       |
| 10587854        | Slc9a9        | 1        | 19       |
| 10588154        | Stag1         | 7        | 1        |
| 10588192        | Msl2          | 7        | 1        |
| 10588223        | Anapc13       | 1        | 13       |
| 10590563        | Lars2         | 1        | 13       |
| 10590860        | 9030420J04Rik | 19       | 1        |
| 10591035        | 5830418K08Rik | 7        | 1        |
| 10591816        | Dpy191        | 19       | 1        |
| 10593526        | Atm           | 7        | 1        |
| 10594460        | Dis3l         | 1        | 13       |
| 10594549        | Gm10144       | 7        | 19       |
| 10595126        | Fbxo9         | 7        | 1        |
| 10598389        | Wdr45         | 7        | 13       |
| 10598626        | Tspan7        | 1        | 13       |
| 10598837        |               | 7        | 19       |
| 10598956        | Araf          | 7        | 19       |
| 10599369        | Xiap          | 19       | 1        |
| 10599554        | Rbmx2         | 19       | 13       |
| 10599826        | F9            | 19       | 1        |
| 10600688        | Map3k7ip3     | 7        | 1        |
| 10601312        | Gm10454       | 19       | 1        |
| 10601616        | Diap2         | 7        | 1        |
| 10602223        | Alg13         | 7        | 1        |
| 10602501        | Huwe1         | 7        | 1        |
| 10602772        | Rps6ka3       | 7        | 1        |
| 10602964        |               | 7        | 19       |
| 10603469        | Rbm3          | 13       | 1        |
| 10603708        | Cask          | 19       | 1        |
| 10604424        | Zfp280c       | 7        | 1        |
| 10604799        | Atp11c        | 7        | 1        |
| 10605090        | Idh3g         | 7        | 13       |
| 10606301        | Magt1         | 19       | 1        |
| 10607002        | Gm7091        | 19       | 13       |
| 10607560        |               | 19       | 13       |
| 10607862        |               | 19       | 13       |
| 10607950        |               | 1        | 19       |
|                 |               |          |          |
| Liver Class III |               |          |          |
| Probe ID        | Gene ID       | Con Peak | TSR Peak |
| 10344618        |               | 19       | N/A      |
| 10344637        | Atp6v1h       | 7        | N/A      |
| 10344723        | Rrs1          | 19       | N/A      |
| 10344741        |               | 19       | N/A      |
| 10344950        | LOC675046     | 19       | N/A      |
| 10344960        | Tmem70        | 19       | N/A      |
| 10345065        | Gsta3         | 19       | N/A      |
| 10345203        | Paox          | 1        | N/A      |
| 10345357        | Imp4          | 7        | N/A      |

|          |               |    |     |
|----------|---------------|----|-----|
| 10345368 | D1Ert448e     | 19 | N/A |
| 10345438 |               | 19 | N/A |
| 10345442 | Hs6st1        | 13 | N/A |
| 10345482 | Cnm4          | 1  | N/A |
| 10345626 | Eif5b         | 1  | N/A |
| 10345706 | D1Bwg0212e    | 1  | N/A |
| 10345904 | A1597479      | 19 | N/A |
| 10346191 | Stat1         | 7  | N/A |
| 10346651 | Bmpr2         | 1  | N/A |
| 10346747 | Cyp20a1       | 1  | N/A |
| 10346762 |               | 19 | N/A |
| 10346780 |               | 13 | N/A |
| 10346838 | Pard3b        | 1  | N/A |
| 10346941 |               | 7  | N/A |
| 10347033 | Crygf         | 19 | N/A |
| 10347117 | Cps1          | 19 | N/A |
| 10347254 | Smarcal1      | 1  | N/A |
| 10347310 | Pnk1          | 1  | N/A |
| 10347335 | Slc11a1       | 19 | N/A |
| 10347774 | Mrpl44        | 1  | N/A |
| 10347796 | Rhbdd1        | 1  | N/A |
| 10347862 | Mff           | 7  | N/A |
| 10347948 | Sp100         | 1  | N/A |
| 10347980 | Itm2c         | 1  | N/A |
| 10348076 | Gm10200       | 1  | N/A |
| 10348087 | Cops7b        | 7  | N/A |
| 10348096 | Dis3l2        | 7  | N/A |
| 10348234 | Neu2          | 19 | N/A |
| 10348277 | Atg16l1       | 7  | N/A |
| 10348299 | 5830472F04Rik | 19 | N/A |
| 10348653 | Gpc1          | 13 | N/A |
| 10348702 | Agxt          | 1  | N/A |
| 10348932 | Zh2c2         | 13 | N/A |
| 10349206 |               | 19 | N/A |
| 10349431 | Acmsd         | 1  | N/A |
| 10349453 | Rab3gap1      | 7  | N/A |
| 10349559 | Yod1          | 13 | N/A |
| 10349562 | AA986860      | 13 | N/A |
| 10349569 |               | 13 | N/A |
| 10349580 | Pigr          | 1  | N/A |
| 10349610 | Lgt1          | 13 | N/A |
| 10349711 | Slc41a1       | 7  | N/A |
| 10349724 | Rab7l1        | 19 | N/A |
| 10349733 | Nucks1        | 19 | N/A |
| 10349744 | Slc45a3       | 19 | N/A |
| 10349782 | Nuak2         | 13 | N/A |
| 10349793 | Dsty1         | 19 | N/A |
| 10349876 | Plekha6       | 7  | N/A |
| 10350003 | Cyb5r1        | 7  | N/A |
| 10350099 | Ptprv         | 19 | N/A |
| 10350113 | Arl8a         | 13 | N/A |
| 10350188 | Tmem9         | 13 | N/A |
| 10350331 | Zfp281        | 13 | N/A |
| 10350489 | Uchl5         | 19 | N/A |
| 10350594 | Ivns1abp      | 13 | N/A |
| 10350733 | Rgs16         | 7  | N/A |
| 10350766 | Stx6          | 1  | N/A |
| 10350977 | 4930523C07Rik | 7  | N/A |
| 10351047 | Cenpl         | 7  | N/A |
| 10351163 | Scyl3         | 7  | N/A |
| 10351259 | Slc19a2       | 1  | N/A |
| 10351277 | Nme7          | 7  | N/A |
| 10351345 |               | 19 | N/A |
| 10351347 | Creg1         | 7  | N/A |
| 10351636 | Refbp2        | 19 | N/A |
| 10351738 | Pex19         | 7  | N/A |
| 10352234 | Itpkb         | 1  | N/A |
| 10352242 | Parp1         | 19 | N/A |
| 10352306 | Pycr2         | 19 | N/A |
| 10352448 | Dusp10        | 1  | N/A |
| 10352576 | Esrrg         | 19 | N/A |
| 10352767 | Nek2          | 1  | N/A |
| 10352827 | A130010J15Rik | 1  | N/A |
| 10352954 |               | 7  | N/A |
| 10353036 | Gm10567       | 19 | N/A |
| 10353135 | Ncoa2         | 7  | N/A |
| 10353167 | Tram1         | 19 | N/A |
| 10353189 | Gm5523        | 19 | N/A |
| 10353272 | Stau2         | 7  | N/A |
| 10353296 |               | 19 | N/A |
| 10353309 | Jph1          | 13 | N/A |
| 10353311 | Jph1          | 13 | N/A |
| 10353438 | Tram2         | 7  | N/A |
| 10353624 | ND4L          | 19 | N/A |

|          |               |    |     |
|----------|---------------|----|-----|
| 10353626 | ATP6          | 19 | N/A |
| 10353630 | COX2          | 19 | N/A |
| 10353707 | Ptp4a1        | 13 | N/A |
| 10353794 | Fam168b       | 7  | N/A |
| 10353878 | Ankrd23       | 19 | N/A |
| 10354085 | Eif5b         | 7  | N/A |
| 10354168 | Tbc1d8        | 13 | N/A |
| 10354233 | Tgfbra1       | 13 | N/A |
| 10354273 |               | 13 | N/A |
| 10354389 | Slc39a10      | 1  | N/A |
| 10354404 | Dnajb6        | 13 | N/A |
| 10354411 |               | 13 | N/A |
| 10354418 |               | 13 | N/A |
| 10354468 |               | 19 | N/A |
| 10354494 | Nab1          | 7  | N/A |
| 10354647 | Pgap1         | 7  | N/A |
| 10354649 | Pgap1         | 7  | N/A |
| 10354868 | Fam126b       | 7  | N/A |
| 10354897 | Trak2         | 13 | N/A |
| 10354919 | 4930408G06Rik | 19 | N/A |
| 10354979 | Als2          | 19 | N/A |
| 10355037 | Wdr12         | 19 | N/A |
| 10355050 | Raph1         | 1  | N/A |
| 10355069 | Ino80d        | 1  | N/A |
| 10355084 | Ndufs1        | 19 | N/A |
| 10355214 | Idh1          | 19 | N/A |
| 10355246 | Acadl         | 13 | N/A |
| 10355278 | ErbB4         | 13 | N/A |
| 10355536 | Tns1          | 13 | N/A |
| 10355658 | Fev           | 19 | N/A |
| 10355706 | Ihh           | 13 | N/A |
| 10355806 | Tuba4a        | 1  | N/A |
| 10355984 | Serpine2      | 19 | N/A |
| 10356262 | Gm7582        | 7  | N/A |
| 10356312 | Ncl           | 13 | N/A |
| 10356351 |               | 13 | N/A |
| 10356568 | Rab17         | 7  | N/A |
| 10356936 | Hisppd1       | 19 | N/A |
| 10356999 | Prdx2         | 19 | N/A |
| 10357003 | Rnf152        | 7  | N/A |
| 10357051 | Kdsr          | 7  | N/A |
| 10357064 | Vps4b         | 1  | N/A |
| 10357158 | Ralb          | 1  | N/A |
| 10357191 | Ptpn4         | 7  | N/A |
| 10357220 | Tmem177       | 1  | N/A |
| 10357249 | Steap3        | 1  | N/A |
| 10357488 | Cd55          | 1  | N/A |
| 10357535 | Pfkfb2        | 13 | N/A |
| 10357676 | Pctk3         | 13 | N/A |
| 10357870 | Prelp         | 1  | N/A |
| 10357878 | Adora1        | 7  | N/A |
| 10357948 | Ppp1r12b      | 7  | N/A |
| 10358050 | Timm17a       | 13 | N/A |
| 10358057 | Shisa4        | 19 | N/A |
| 10358191 | Camsap1l1     | 13 | N/A |
| 10358210 | Nr5a2         | 7  | N/A |
| 10358259 | Nek7          | 7  | N/A |
| 10358523 | Hmcn1         | 19 | N/A |
| 10358567 | Hmcn1         | 1  | N/A |
| 10358583 | Hmcn1         | 1  | N/A |
| 10358599 | Hmcn1         | 19 | N/A |
| 10358615 | Hmcn1         | 19 | N/A |
| 10358726 | Tsen15        | 19 | N/A |
| 10358733 | Rgl1          | 1  | N/A |
| 10358754 | Gm7278        | 19 | N/A |
| 10358849 | Dhx9          | 13 | N/A |
| 10358894 | Sord          | 19 | N/A |
| 10358999 | Xpr1          | 7  | N/A |
| 10359506 | Mettl13       | 13 | N/A |
| 10359582 | Fmo2          | 13 | N/A |
| 10359677 | Blzf1         | 13 | N/A |
| 10359689 | Atp1b1        | 13 | N/A |
| 10359734 | Dcaf6         | 7  | N/A |
| 10359859 |               | 19 | N/A |
| 10359861 | Mgst3         | 19 | N/A |
| 10359929 | Ddr2          | 1  | N/A |
| 10360003 | Dusp12        | 19 | N/A |
| 10360026 | Uqcrb         | 19 | N/A |
| 10360053 | Pcp4l1        | 19 | N/A |
| 10360105 | Usp21         | 1  | N/A |
| 10360382 | Ifi204        | 1  | N/A |
| 10360540 | 4930527J03Rik | 19 | N/A |
| 10360631 | Cabc1         | 1  | N/A |
| 10360648 | Psen2         | 19 | N/A |

|          |               |    |     |
|----------|---------------|----|-----|
| 10360806 | Capn2         | 19 | N/A |
| 10361152 | Gstp1         | 7  | N/A |
| 10361156 | Rcor3         | 7  | N/A |
| 10361246 | G0s2          | 13 | N/A |
| 10361323 | Cnksr3        | 1  | N/A |
| 10361660 | Lats1         | 7  | N/A |
| 10361680 | BC013529      | 13 | N/A |
| 10361828 | Cited2        | 1  | N/A |
| 10361882 | Nhsl1         | 19 | N/A |
| 10361897 | Ifngr1        | 1  | N/A |
| 10361956 | Mtap7         | 1  | N/A |
| 10362138 | Vnn1          | 7  | N/A |
| 10362294 | Arhgap18      | 1  | N/A |
| 10362389 |               | 19 | N/A |
| 10362420 | Trdn          | 19 | N/A |
| 10362615 | Traf3ip2      | 1  | N/A |
| 10362701 | Ddo           | 19 | N/A |
| 10362899 | F830002L21Rik | 19 | N/A |
| 10362902 | Gm9034        | 19 | N/A |
| 10362922 | Atg5          | 1  | N/A |
| 10362937 | Gm6983        | 19 | N/A |
| 10362941 | Prep          | 13 | N/A |
| 10363137 | Nus1          | 13 | N/A |
| 10363346 | Ankrd57       | 19 | N/A |
| 10363379 | Cbara1        | 7  | N/A |
| 10363392 | Dnajb12       | 1  | N/A |
| 10363498 | Ppa1          | 19 | N/A |
| 10363541 | Ass1          | 19 | N/A |
| 10363563 | Slc25a16      | 19 | N/A |
| 10363629 | Pbld          | 7  | N/A |
| 10363639 | Atoh7         | 19 | N/A |
| 10363894 | lpmk          | 19 | N/A |
| 10363905 | Zwint         | 13 | N/A |
| 10364091 |               | 19 | N/A |
| 10364222 | Ftcd          | 7  | N/A |
| 10364702 | Midn          | 7  | N/A |
| 10364752 | Dazap1        | 13 | N/A |
| 10364824 | Csnk1g2       | 13 | N/A |
| 10364916 | 3110056003Rik | 1  | N/A |
| 10365227 | Ap3m1         | 13 | N/A |
| 10365230 | Tdg           | 7  | N/A |
| 10365420 | AI597468      | 1  | N/A |
| 10365578 | Nup37         | 7  | N/A |
| 10365845 | Fgd6          | 7  | N/A |
| 10365887 | Ndufa12       | 19 | N/A |
| 10365926 |               | 19 | N/A |
| 10365966 | Gm5426        | 13 | N/A |
| 10365971 | Btg1          | 1  | N/A |
| 10366038 | Galnt4        | 19 | N/A |
| 10366301 |               | 13 | N/A |
| 10366337 | Nap111        | 19 | N/A |
| 10366476 | Ptprb         | 1  | N/A |
| 10366667 | Gns           | 13 | N/A |
| 10366705 | Gm9081        | 19 | N/A |
| 10366848 | B4galnt1      | 7  | N/A |
| 10366866 | Dctn2         | 7  | N/A |
| 10366909 | R3hdm2        | 1  | N/A |
| 10367076 | Prim1         | 19 | N/A |
| 10367100 | Ptges3        | 19 | N/A |
| 10367292 | Cs            | 1  | N/A |
| 10367305 | Ankrd52       | 13 | N/A |
| 10367400 | Mmp19         | 19 | N/A |
| 10367544 | Ctdsp2        | 7  | N/A |
| 10367717 | BC013529      | 13 | N/A |
| 10367744 |               | 19 | N/A |
| 10367822 | Rab32         | 1  | N/A |
| 10367960 | Pex3          | 7  | N/A |
| 10368083 | Ccdc28a       | 1  | N/A |
| 10368229 | Tbpl1         | 19 | N/A |
| 10368277 | Rps12         | 19 | N/A |
| 10368356 | Akap7         | 7  | N/A |
| 10368475 |               | 19 | N/A |
| 10368486 | Rnf146        | 1  | N/A |
| 10368527 | Hint3         | 1  | N/A |
| 10368647 | Dse           | 1  | N/A |
| 10368670 | Amd1          | 13 | N/A |
| 10368675 | Marcks        | 1  | N/A |
| 10368730 | Bxdc1         | 13 | N/A |
| 10368748 | Amd1          | 13 | N/A |
| 10368845 | 2410017P07Rik | 1  | N/A |
| 10368883 | Tdg           | 7  | N/A |
| 10369221 | Dux           | 19 | N/A |
| 10369264 | Oit3          | 1  | N/A |
| 10369276 | Ccdc109a      | 1  | N/A |

|          |               |    |     |
|----------|---------------|----|-----|
| 10369630 | Ddx21         | 13 | N/A |
| 10369647 | Ddx50         | 19 | N/A |
| 10369806 | 1700040L02Rik | 13 | N/A |
| 10369929 |               | 19 | N/A |
| 10369948 | Cabin1        | 7  | N/A |
| 10370013 | Gstt2         | 7  | N/A |
| 10370259 | Col18a1       | 7  | N/A |
| 10370303 | Adarb1        | 13 | N/A |
| 10370422 | Pwp2          | 13 | N/A |
| 10370552 | Ppap2c        | 7  | N/A |
| 10370665 | Med16         | 13 | N/A |
| 10370681 | C030046I01Rik | 13 | N/A |
| 10370824 | Mbd3          | 19 | N/A |
| 10370892 | Rexo1         | 7  | N/A |
| 10371111 | Tjp3          | 1  | N/A |
| 10371159 | Fzr1          | 7  | N/A |
| 10371230 | Gna11         | 13 | N/A |
| 10371256 | Sirt6         | 7  | N/A |
| 10371271 | Zfp781        | 19 | N/A |
| 10371796 | Slc17a8       | 19 | N/A |
| 10371959 | Elk3          | 1  | N/A |
| 10372005 | Vezt          | 7  | N/A |
| 10372060 | Cradd         | 1  | N/A |
| 10372130 | 4930430F08Rik | 19 | N/A |
| 10372324 | Syt1          | 13 | N/A |
| 10372478 | Rab21         | 1  | N/A |
| 10372733 | Cdc5l         | 13 | N/A |
| 10372735 | Cdc5l         | 13 | N/A |
| 10372737 | Cdc5l         | 13 | N/A |
| 10372739 | Cdc5l         | 13 | N/A |
| 10372741 | Cdc5l         | 13 | N/A |
| 10372743 | Cdc5l         | 13 | N/A |
| 10372807 | Msrb3         | 1  | N/A |
| 10372877 | Xpot          | 13 | N/A |
| 10373143 | Mbd6          | 7  | N/A |
| 10373192 | Inhbe         | 7  | N/A |
| 10373467 | Erb3          | 1  | N/A |
| 10373515 | Suox          | 1  | N/A |
| 10373521 | Rab5b         | 7  | N/A |
| 10373530 | Cdk2          | 7  | N/A |
| 10373618 | Olf771        | 19 | N/A |
| 10373622 | Olf773        | 19 | N/A |
| 10373690 |               | 13 | N/A |
| 10374106 | Ykt6          | 13 | N/A |
| 10374181 | Gm11971       | 19 | N/A |
| 10374223 | Igfbp1        | 1  | N/A |
| 10374415 | Ppp3r1        | 13 | N/A |
| 10374466 | Rab1          | 19 | N/A |
| 10374558 |               | 19 | N/A |
| 10375145 | Lcp2          | 1  | N/A |
| 10375214 |               | 19 | N/A |
| 10375234 | Nudcd2        | 13 | N/A |
| 10375290 | Slu7          | 1  | N/A |
| 10375343 | Rnf145        | 13 | N/A |
| 10375358 | Ebf1          | 19 | N/A |
| 10375382 | Clint1        | 1  | N/A |
| 10375483 | Gm12176       | 19 | N/A |
| 10375499 | Snord96a      | 13 | N/A |
| 10375811 |               | 1  | N/A |
| 10375893 | Sar1b         | 7  | N/A |
| 10375973 | Taf13         | 19 | N/A |
| 10375980 | Aff4          | 7  | N/A |
| 10376033 | Kif3a         | 19 | N/A |
| 10376142 | 3230401D17Rik | 19 | N/A |
| 10376292 |               | 1  | N/A |
| 10376312 | Larp1         | 1  | N/A |
| 10376326 | Igtp          | 7  | N/A |
| 10376444 | Hist3h2ba     | 19 | N/A |
| 10376534 | Mprip         | 7  | N/A |
| 10376557 | Nt5m          | 1  | N/A |
| 10376596 | 4933439F18Rik | 19 | N/A |
| 10377364 | Rnf222        | 1  | N/A |
| 10377380 | 1500010J02Rik | 1  | N/A |
| 10377431 | Vamp2         | 7  | N/A |
| 10377439 | Per1          | 13 | N/A |
| 10377508 | Trappc1       | 13 | N/A |
| 10377603 | Tmem102       | 19 | N/A |
| 10377612 | Plscr3        | 1  | N/A |
| 10377652 | Gps2          | 1  | N/A |
| 10377695 | Phf23         | 13 | N/A |
| 10377826 | Zmynd15       | 1  | N/A |
| 10377847 | Gltpd2        | 1  | N/A |
| 10377889 | Mink1         | 1  | N/A |
| 10378059 | Txndc17       | 13 | N/A |



|          |               |    |     |
|----------|---------------|----|-----|
| 10378068 | Xaf1          | 7  | N/A |
| 10378082 | Ggt6          | 19 | N/A |
| 10378271 | 1200014J11Rik | 7  | N/A |
| 10378341 | Shpk          | 13 | N/A |
| 10378427 | Oifr401       | 19 | N/A |
| 10378453 | 1300001101Rik | 1  | N/A |
| 10378568 |               | 7  | N/A |
| 10378579 | Prpf8         | 7  | N/A |
| 10378739 | Ywhae         | 13 | N/A |
| 10378833 | Ssh2          | 7  | N/A |
| 10378848 | Hsp90aa1      | 19 | N/A |
| 10378988 | Phf12         | 7  | N/A |
| 10379013 | Flot2         | 13 | N/A |
| 10379153 | Aldoc         | 13 | N/A |
| 10379260 | Gm11201       | 19 | N/A |
| 10379344 | Gm10387       | 13 | N/A |
| 10379467 | Psmc11        | 1  | N/A |
| 10379560 | Zfp830        | 13 | N/A |
| 10379564 | Lig3          | 19 | N/A |
| 10379727 | Gm11428       | 1  | N/A |
| 10379820 | Acaca         | 19 | N/A |
| 10379901 | Bcas3         | 7  | N/A |
| 10379998 | Trim37        | 19 | N/A |
| 10380059 |               | 1  | N/A |
| 10380061 |               | 1  | N/A |
| 10380063 |               | 1  | N/A |
| 10380065 |               | 1  | N/A |
| 10380087 | Mtmr4         | 1  | N/A |
| 10380210 | Sfrs1         | 19 | N/A |
| 10380244 | 1700106J16Rik | 19 | N/A |
| 10380260 | Trim25        | 7  | N/A |
| 10380289 | Mmd           | 7  | N/A |
| 10380318 |               | 19 | N/A |
| 10380384 | Ankrd40       | 19 | N/A |
| 10380403 | Lrrc59        | 13 | N/A |
| 10380417 |               | 1  | N/A |
| 10380524 | Slc35b1       | 19 | N/A |
| 10380566 | Phospho1      | 1  | N/A |
| 10380571 | Gngt2         | 1  | N/A |
| 10380634 | Hoxb7         | 19 | N/A |
| 10380761 | Socs7         | 13 | N/A |
| 10380823 | Lasp1         | 1  | N/A |
| 10380927 | Grb7          | 1  | N/A |
| 10380986 | Psmc3         | 7  | N/A |
| 10381063 | Wipf2         | 1  | N/A |
| 10381096 | Igfbp4        | 13 | N/A |
| 10381170 | Hspb9         | 19 | N/A |
| 10381416 | Rnd2          | 19 | N/A |
| 10381445 | Tmem106a      | 7  | N/A |
| 10381474 | Arl4d         | 1  | N/A |
| 10381528 | Nags          | 19 | N/A |
| 10381567 | Tmub2         | 7  | N/A |
| 10381683 | Acbd4         | 19 | N/A |
| 10381697 | Hexim1        | 19 | N/A |
| 10381807 | Lin52         | 7  | N/A |
| 10382010 | Dcaf7         | 7  | N/A |
| 10382115 | Ccdc45        | 19 | N/A |
| 10382136 | 1810010H24Rik | 7  | N/A |
| 10382228 | Axin2         | 7  | N/A |
| 10382243 | Gna13         | 1  | N/A |
| 10382300 | Map2k6        | 13 | N/A |
| 10382321 | Kcnj2         | 1  | N/A |
| 10382328 | Sox9          | 19 | N/A |
| 10382345 | Cog1          | 7  | N/A |
| 10382538 | Armc7         | 19 | N/A |
| 10382573 | 2310067B10Rik | 1  | N/A |
| 10382756 | Unk           | 7  | N/A |
| 10382797 | Gm7367        | 7  | N/A |
| 10382844 | Snord1c       | 7  | N/A |
| 10382888 | 2810008D09Rik | 13 | N/A |
| 10382912 | Sept9         | 1  | N/A |
| 10383133 | Slc26a11      | 7  | N/A |
| 10383152 |               | 7  | N/A |
| 10383168 |               | 7  | N/A |
| 10383198 |               | 7  | N/A |
| 10383200 |               | 7  | N/A |
| 10383202 |               | 7  | N/A |
| 10383204 |               | 7  | N/A |
| 10383206 |               | 7  | N/A |
| 10383210 |               | 7  | N/A |
| 10383212 |               | 7  | N/A |
| 10383214 | Rnf213        | 1  | N/A |
| 10383360 | Ccdc137       | 13 | N/A |
| 10383434 | Notum         | 1  | N/A |

|          |               |    |     |
|----------|---------------|----|-----|
| 10383532 | Narf          | 7  | N/A |
| 10383765 |               | 7  | N/A |
| 10383867 | Mtmr3         | 1  | N/A |
| 10383993 | Ccdc117       | 19 | N/A |
| 10384004 | 2010005J08Rik | 7  | N/A |
| 10384123 | Ddx56         | 13 | N/A |
| 10384138 | Tmed4         | 13 | N/A |
| 10384152 | Purb          | 7  | N/A |
| 10384322 | Hus1          | 19 | N/A |
| 10384378 | Ddc           | 19 | N/A |
| 10384396 |               | 19 | N/A |
| 10384423 |               | 13 | N/A |
| 10384497 |               | 1  | N/A |
| 10384522 | Actr2         | 19 | N/A |
| 10384539 | Slc1a4        | 1  | N/A |
| 10384672 | Ahsa2         | 19 | N/A |
| 10384766 |               | 19 | N/A |
| 10384883 | 4931440F15Rik | 19 | N/A |
| 10385004 | Mare          | 13 | N/A |
| 10385022 | Efcab9        | 1  | N/A |
| 10385081 |               | 19 | N/A |
| 10385486 | Trim41        | 13 | N/A |
| 10385500 | Irgm1         | 1  | N/A |
| 10385504 | Gm5431        | 1  | N/A |
| 10385513 | 9930111J21Rik | 1  | N/A |
| 10385518 | Tgtp          | 1  | N/A |
| 10385533 | Tgtp          | 1  | N/A |
| 10385572 | Sqstm1        | 1  | N/A |
| 10385599 | Canx          | 19 | N/A |
| 10385665 | Zfp354b       | 19 | N/A |
| 10385686 | Hnrnpab       | 19 | N/A |
| 10385699 | Rmnd5b        | 1  | N/A |
| 10385761 | Ube2b         | 7  | N/A |
| 10385774 | Olfrl1371     | 19 | N/A |
| 10385966 | Anxa6         | 19 | N/A |
| 10386058 | Sparc         | 1  | N/A |
| 10386093 | Snord1c       | 7  | N/A |
| 10386236 | Hist3h2bb     | 19 | N/A |
| 10386400 | Arih2         | 7  | N/A |
| 10386402 | Zkscan17      | 7  | N/A |
| 10386543 | Pabpc4        | 13 | N/A |
| 10386548 | Pabpc4        | 13 | N/A |
| 10386636 | Usp22         | 13 | N/A |
| 10386775 | Prpsap2       | 1  | N/A |
| 10386824 | Akap10        | 7  | N/A |
| 10387372 | Kdm6b         | 13 | N/A |
| 10387648 | Tmem102       | 1  | N/A |
| 10387890 | Cxcl16        | 1  | N/A |
| 10388010 | C1qbp         | 13 | N/A |
| 10388031 |               | 7  | N/A |
| 10388194 | Spns2         | 1  | N/A |
| 10388254 | Aspa          | 19 | N/A |
| 10388304 |               | 7  | N/A |
| 10388440 | Serpinf2      | 7  | N/A |
| 10388684 | Taok1         | 7  | N/A |
| 10388734 | Eral1         | 7  | N/A |
| 10388749 | Traf4         | 7  | N/A |
| 10388834 | Slc13a2       | 19 | N/A |
| 10388902 | Lgals9        | 1  | N/A |
| 10389087 | Rffl          | 7  | N/A |
| 10389114 | Nle1          | 13 | N/A |
| 10389134 | Sifn9         | 7  | N/A |
| 10389222 | Ccl6          | 1  | N/A |
| 10389229 |               | 19 | N/A |
| 10389238 | Dusp14        | 19 | N/A |
| 10389261 | Gm11437       | 19 | N/A |
| 10389581 | Ypel2         | 1  | N/A |
| 10389680 | Msi2          | 1  | N/A |
| 10389701 | Akap1         | 7  | N/A |
| 10389786 | Hlf           | 13 | N/A |
| 10389795 | Stxbp4        | 19 | N/A |
| 10390308 | Sp2           | 1  | N/A |
| 10390352 | Kpnb1         | 19 | N/A |
| 10390635 | 1810046J19Rik | 1  | N/A |
| 10390653 | Med24         | 1  | N/A |
| 10390768 | Smarce1       | 1  | N/A |
| 10391146 | Acly          | 19 | N/A |
| 10391207 | Dhx58         | 7  | N/A |
| 10391301 | Stat3         | 7  | N/A |
| 10391410 | Cntd1         | 19 | N/A |
| 10391431 | Aarsd1        | 19 | N/A |
| 10391572 | Lsm12         | 19 | N/A |
| 10391625 | Ubtf          | 7  | N/A |
| 10391768 | Eftud2        | 19 | N/A |

|          |               |    |     |
|----------|---------------|----|-----|
| 10392033 |               | 19 | N/A |
| 10392087 | Ccdc47        | 19 | N/A |
| 10392207 | Tex2          | 19 | N/A |
| 10392251 | Ddx5          | 7  | N/A |
| 10392284 | Kpna2         | 13 | N/A |
| 10392300 | Bptf          | 1  | N/A |
| 10392347 | Pitpnc1       | 7  | N/A |
| 10392388 | Prkca         | 7  | N/A |
| 10392437 | Gm11696       | 1  | N/A |
| 10392464 | Fam20a        | 1  | N/A |
| 10392735 | Cdc42ep4      | 7  | N/A |
| 10392936 | Nt5c          | 19 | N/A |
| 10392970 | Mif4gd        | 1  | N/A |
| 10393058 | H3f3b         | 1  | N/A |
| 10393309 | Prpsap1       | 13 | N/A |
| 10393544 | Cyth1         | 7  | N/A |
| 10393620 | Cbx4          | 13 | N/A |
| 10393774 | Nploc4        | 13 | N/A |
| 10393970 | Fasn          | 19 | N/A |
| 10394082 | 111003102Rik  | 19 | N/A |
| 10394186 | Dtnb          | 7  | N/A |
| 10394538 | Acaca         | 13 | N/A |
| 10394560 | Smc6          | 7  | N/A |
| 10394690 | E2f6          | 19 | N/A |
| 10394699 | Rock2         | 13 | N/A |
| 10394735 | Pdia6         | 19 | N/A |
| 10394770 | Odc1          | 19 | N/A |
| 10394800 | Bnip3l        | 13 | N/A |
| 10394846 |               | 19 | N/A |
| 10394862 | Ddef2         | 1  | N/A |
| 10394988 |               | 19 | N/A |
| 10395058 | Adi1          | 7  | N/A |
| 10395064 | Tssc1         | 1  | N/A |
| 10395103 | Pxdn          | 1  | N/A |
| 10395158 | 6030469F06Rik | 19 | N/A |
| 10395198 | Gm9359        | 1  | N/A |
| 10395293 | Atxn7l1       | 1  | N/A |
| 10395457 | Etv1          | 19 | N/A |
| 10395466 | Dock4         | 7  | N/A |
| 10395532 |               | 19 | N/A |
| 10395932 | Ctage5        | 19 | N/A |
| 10395976 | Dnajb6        | 13 | N/A |
| 10395978 | Gm527         | 1  | N/A |
| 10396141 |               | 19 | N/A |
| 10396161 | Tmx1          | 19 | N/A |
| 10396476 | Rhoj          | 1  | N/A |
| 10396511 | Syne2         | 7  | N/A |
| 10396610 | Mthfd1        | 1  | N/A |
| 10396671 | Plekhg3       | 7  | N/A |
| 10396730 |               | 19 | N/A |
| 10396936 | Smoc1         | 7  | N/A |
| 10397002 | Sipa1l1       | 1  | N/A |
| 10397068 | Rbm25         | 19 | N/A |
| 10397081 | Rbm25         | 19 | N/A |
| 10397083 | Rbm25         | 19 | N/A |
| 10397249 | Lin52         | 7  | N/A |
| 10397281 | Ylpm1         | 7  | N/A |
| 10397541 | Gm5039        | 19 | N/A |
| 10397627 |               | 19 | N/A |
| 10397645 | Gpr65         | 1  | N/A |
| 10397717 |               | 19 | N/A |
| 10397853 | Rin3          | 1  | N/A |
| 10397866 | Golga5        | 7  | N/A |
| 10398069 | Serpina3m     | 19 | N/A |
| 10398398 |               | 19 | N/A |
| 10398400 |               | 19 | N/A |
| 10398414 |               | 13 | N/A |
| 10398601 | Rcor1         | 1  | N/A |
| 10398695 | Mark3         | 7  | N/A |
| 10398795 | Aspg          | 7  | N/A |
| 10398972 | Mta1          | 13 | N/A |
| 10398996 | Crip2         | 1  | N/A |
| 10399146 |               | 13 | N/A |
| 10399198 | Ncoa4         | 13 | N/A |
| 10399228 | Gm6742        | 19 | N/A |
| 10399379 | Pgk1          | 19 | N/A |
| 10399419 |               | 1  | N/A |
| 10399465 | Fam84a        | 1  | N/A |
| 10399605 | Adam17        | 19 | N/A |
| 10399677 | Cox7a2l       | 7  | N/A |
| 10399696 | Rnf144a       | 1  | N/A |
| 10399710 | Rsad2         | 1  | N/A |
| 10400095 |               | 13 | N/A |
| 10400304 | Egln3         | 1  | N/A |

|          |               |    |     |
|----------|---------------|----|-----|
| 10400405 | Nfkbia        | 13 | N/A |
| 10400605 | Rpl10l        | 19 | N/A |
| 10400844 | Pygl          | 19 | N/A |
| 10400883 | Timm9         | 13 | N/A |
| 10400892 | Gm7985        | 19 | N/A |
| 10400941 | Dhrs7         | 19 | N/A |
| 10400975 | Trmt5         | 19 | N/A |
| 10401007 | Ppp2r5e       | 13 | N/A |
| 10401050 | Gm7862        | 19 | N/A |
| 10401128 | Max           | 13 | N/A |
| 10401138 | Atp6v1d       | 13 | N/A |
| 10401181 | Rdh11         | 19 | N/A |
| 10401192 | Zfyve26       | 7  | N/A |
| 10401244 | Actn1         | 13 | N/A |
| 10401365 |               | 1  | N/A |
| 10401382 | Numb          | 7  | N/A |
| 10401420 |               | 19 | N/A |
| 10401667 | 0610007P14Rik | 7  | N/A |
| 10401713 | Pomt2         | 13 | N/A |
| 10401891 | Ston2         | 1  | N/A |
| 10401900 | Sel1l         | 1  | N/A |
| 10401939 | Lysmd1        | 13 | N/A |
| 10402066 | Foxn3         | 13 | N/A |
| 10402096 | Ttc7b         | 13 | N/A |
| 10402266 |               | 7  | N/A |
| 10402283 | Itpk1         | 1  | N/A |
| 10402302 | Btd7          | 7  | N/A |
| 10402336 | Ddx24         | 7  | N/A |
| 10402390 | Serpina1b     | 19 | N/A |
| 10402399 | Serpina1a     | 19 | N/A |
| 10402406 | Serpina1c     | 19 | N/A |
| 10402409 | Serpina1e     | 19 | N/A |
| 10402519 | Atg2b         | 7  | N/A |
| 10402604 |               | 1  | N/A |
| 10402615 | Hsp90aa1      | 19 | N/A |
| 10402730 | Ppp1r13b      | 7  | N/A |
| 10402841 | Brf1          | 7  | N/A |
| 10403003 | LOC638560     | 19 | N/A |
| 10403076 |               | 19 | N/A |
| 10403108 | Hmgn2         | 13 | N/A |
| 10403110 | Gm10421       | 19 | N/A |
| 10403273 | Asb13         | 19 | N/A |
| 10403291 | Akr1c14       | 19 | N/A |
| 10403312 | Akr1c19       | 13 | N/A |
| 10403428 | Larp5         | 13 | N/A |
| 10403455 | Dip2c         | 7  | N/A |
| 10403462 | Dip2c         | 7  | N/A |
| 10403584 | Nid1          | 1  | N/A |
| 10403664 | B3galnt2      | 19 | N/A |
| 10403934 | Isca1         | 13 | N/A |
| 10404016 | V1ri5         | 19 | N/A |
| 10404033 | Hist1h1d      | 19 | N/A |
| 10404049 | Hist1h3g      | 1  | N/A |
| 10404051 | Hist1h4d      | 19 | N/A |
| 10404059 |               | 19 | N/A |
| 10404097 | Slc17a3       | 19 | N/A |
| 10404218 | Gpld1         | 13 | N/A |
| 10404376 | Agtr1a        | 7  | N/A |
| 10404380 | Dusp22        | 7  | N/A |
| 10404422 | Serpinb6b     | 1  | N/A |
| 10404429 | Serpinb9      | 7  | N/A |
| 10404496 | Nqo2          | 1  | N/A |
| 10404606 | Ly86          | 1  | N/A |
| 10404649 | Dsp           | 7  | N/A |
| 10404702 | Gcnt2         | 13 | N/A |
| 10404717 | Pak1ip1       | 19 | N/A |
| 10404941 | Aof1          | 19 | N/A |
| 10404965 | Rnf144b       | 1  | N/A |
| 10404975 | Id4           | 19 | N/A |
| 10405236 | Sfxn1         | 19 | N/A |
| 10405263 | 4732471D19Rik | 13 | N/A |
| 10405511 | Ddx46         | 7  | N/A |
| 10405693 | Dapk1         | 1  | N/A |
| 10405733 | Gm7036        | 19 | N/A |
| 10405741 | Gm3338        | 19 | N/A |
| 10405743 |               | 13 | N/A |
| 10405783 |               | 13 | N/A |
| 10405822 | Ccrk          | 19 | N/A |
| 10405890 |               | 19 | N/A |
| 10405948 | BC048507      | 19 | N/A |
| 10405969 |               | 19 | N/A |
| 10405971 | Nsun2         | 19 | N/A |
| 10406108 | 5430425J12Rik | 19 | N/A |
| 10406141 | Brd9          | 7  | N/A |

|          |               |    |     |
|----------|---------------|----|-----|
| 10406245 |               | 7  | N/A |
| 10406364 | 2210408121Rik | 7  | N/A |
| 10406407 | Arrdc3        | 7  | N/A |
| 10406423 | Mblac2        | 19 | N/A |
| 10406530 | Tmem167       | 19 | N/A |
| 10406564 | Acot12        | 7  | N/A |
| 10406581 | Dhfr          | 13 | N/A |
| 10406598 | Serinc5       | 7  | N/A |
| 10406626 | Homer1        | 19 | N/A |
| 10406757 | Col4a3bp      | 7  | N/A |
| 10406795 | Gfm2          | 19 | N/A |
| 10407097 | Pde4d         | 7  | N/A |
| 10407211 | Ppap2a        | 1  | N/A |
| 10407390 | Ptbp1         | 7  | N/A |
| 10407511 |               | 19 | N/A |
| 10407533 |               | 19 | N/A |
| 10407543 | Gtpbp4        | 13 | N/A |
| 10407707 | Gm10336       | 13 | N/A |
| 10407766 | Lgals8        | 1  | N/A |
| 10407792 | Gpr137b-ps    | 19 | N/A |
| 10407892 | Cdc2l5        | 7  | N/A |
| 10408081 | Hist1h1b      | 19 | N/A |
| 10408123 | V1rh2         | 19 | N/A |
| 10408212 | Hist1h2be     | 19 | N/A |
| 10408227 | Hfe           | 1  | N/A |
| 10408455 | Cdkal1        | 19 | N/A |
| 10408610 | Tubb2a        | 1  | N/A |
| 10408616 | Slc22a23      | 7  | N/A |
| 10408689 | Nrn1          | 1  | N/A |
| 10408709 | Ssr1          | 19 | N/A |
| 10408755 | Muted         | 19 | N/A |
| 10408762 | Eef1e1        | 19 | N/A |
| 10408932 | Gm8513        | 19 | N/A |
| 10409265 | Auh           | 7  | N/A |
| 10409278 | Nfil3         | 1  | N/A |
| 10409322 | Thoc3         | 7  | N/A |
| 10409338 | Nop16         | 19 | N/A |
| 10409345 | Cltb          | 13 | N/A |
| 10409414 | Rab24         | 13 | N/A |
| 10409526 | BC021381      | 7  | N/A |
| 10409643 | Hnrmpa0       | 7  | N/A |
| 10409645 | Ubqln1        | 1  | N/A |
| 10409660 | Gkap1         | 13 | N/A |
| 10409799 | Isca1         | 19 | N/A |
| 10409804 | Zcchc6        | 7  | N/A |
| 10409966 |               | 19 | N/A |
| 10409978 | 6720457D02Rik | 1  | N/A |
| 10409990 | 6720489N17Rik | 19 | N/A |
| 10410244 | Zfp640        | 19 | N/A |
| 10410248 | Zfp640        | 19 | N/A |
| 10410259 | Uqcrb         | 19 | N/A |
| 10410341 | Zfp87         | 19 | N/A |
| 10410393 | Mtrr          | 13 | N/A |
| 10410435 | Polr          | 13 | N/A |
| 10410452 | Srd5a1        | 19 | N/A |
| 10410508 | Ndufs6        | 19 | N/A |
| 10410709 | Rfesd         | 1  | N/A |
| 10410877 | Polr3g        | 19 | N/A |
| 10411119 | Papd4         | 7  | N/A |
| 10411147 | Bhmt2         | 19 | N/A |
| 10411156 | Scamp1        | 7  | N/A |
| 10411223 | S100z         | 19 | N/A |
| 10411332 | Hmgcr         | 13 | N/A |
| 10411595 | Naip2         | 1  | N/A |
| 10411776 |               | 13 | N/A |
| 10411782 | Pik3r1        | 19 | N/A |
| 10411853 | ErbB2ip       | 7  | N/A |
| 10411927 | Sdccag10      | 7  | N/A |
| 10412060 | Gm8985        | 19 | N/A |
| 10412260 | Fst           | 1  | N/A |
| 10412380 |               | 1  | N/A |
| 10412421 | Zfp131        | 13 | N/A |
| 10412562 | Flnb          | 13 | N/A |
| 10412624 | Pxk           | 7  | N/A |
| 10412711 | Uqcrb         | 19 | N/A |
| 10412741 | Atxn7         | 7  | N/A |
| 10412919 |               | 19 | N/A |
| 10412943 | Nudt13        | 1  | N/A |
| 10413059 | Vcl           | 1  | N/A |
| 10413138 | Vdac2         | 13 | N/A |
| 10413171 |               | 1  | N/A |
| 10413220 | Gm10397       | 1  | N/A |
| 10413282 | Fam116a       | 19 | N/A |
| 10413461 | Erc2          | 19 | N/A |

|          |               |    |     |
|----------|---------------|----|-----|
| 10413530 | Dcp1a         | 7  | N/A |
| 10413574 | Sfmbt1        | 13 | N/A |
| 10413803 | Btd           | 1  | N/A |
| 10413826 | Oxnad1        | 1  | N/A |
| 10413839 | Ncoa4         | 13 | N/A |
| 10413932 | E130203B14Rik | 1  | N/A |
| 10413977 | Gm626         | 19 | N/A |
| 10414163 | Lrit1         | 7  | N/A |
| 10414192 | Mat1a         | 13 | N/A |
| 10414228 | 1700024B05Rik | 19 | N/A |
| 10414234 |               | 19 | N/A |
| 10414250 |               | 19 | N/A |
| 10414475 | Olfr738       | 19 | N/A |
| 10414514 | Pnp1          | 1  | N/A |
| 10414527 | Pnp1          | 1  | N/A |
| 10414537 | Ang           | 13 | N/A |
| 10414661 | Gm8586        | 19 | N/A |
| 10414790 |               | 19 | N/A |
| 10414900 |               | 19 | N/A |
| 10415021 | Abhd4         | 1  | N/A |
| 10415030 |               | 7  | N/A |
| 10415065 | Lrp10         | 7  | N/A |
| 10415282 | Psme1         | 13 | N/A |
| 10415293 | Rnf31         | 1  | N/A |
| 10415415 | 9130227C08Rik | 1  | N/A |
| 10415444 |               | 19 | N/A |
| 10415513 | Parp4         | 13 | N/A |
| 10415649 | Zdhhc20       | 13 | N/A |
| 10415723 |               | 19 | N/A |
| 10415885 | Sox7          | 19 | N/A |
| 10415888 | Gm10867       | 19 | N/A |
| 10416044 | Ccdc25        | 1  | N/A |
| 10416107 | Gm10032       | 13 | N/A |
| 10416266 | Ppp3cc        | 19 | N/A |
| 10416290 | Reep4         | 1  | N/A |
| 10416332 | B930095I24Rik | 19 | N/A |
| 10416371 | Lpar6         | 19 | N/A |
| 10416588 | 1300010F03Rik | 7  | N/A |
| 10416705 | Gm9264        | 19 | N/A |
| 10417000 |               | 19 | N/A |
| 10417013 | Dnajc3        | 19 | N/A |
| 10417034 | Dnajc3        | 19 | N/A |
| 10417053 | Mbnl2         | 13 | N/A |
| 10417065 | Rap2a         | 19 | N/A |
| 10417070 |               | 13 | N/A |
| 10417526 | Dnase1l3      | 1  | N/A |
| 10417538 |               | 13 | N/A |
| 10417601 | Ptma          | 13 | N/A |
| 10417617 |               | 19 | N/A |
| 10417676 | Thoc7         | 19 | N/A |
| 10417689 | Psmc6         | 1  | N/A |
| 10417759 | Ube2e2        | 7  | N/A |
| 10417798 | Kcnk5         | 13 | N/A |
| 10417950 | Ndst2         | 7  | N/A |
| 10418004 | Ap3m1         | 13 | N/A |
| 10418171 | Zcchc24       | 13 | N/A |
| 10418185 | D14Ert449e    | 19 | N/A |
| 10418198 | D14Ert449e    | 19 | N/A |
| 10418210 | D14Ert449e    | 19 | N/A |
| 10418410 | Prkcd         | 7  | N/A |
| 10418455 | Itih1         | 1  | N/A |
| 10418480 | Gnl3          | 13 | N/A |
| 10418720 | Mettl6        | 7  | N/A |
| 10418747 | Hacl1         | 19 | N/A |
| 10418905 | Fam35a        | 13 | N/A |
| 10419073 | Tspan14       | 1  | N/A |
| 10419136 |               | 13 | N/A |
| 10419198 | Ero1l         | 13 | N/A |
| 10419261 | Bmp4          | 1  | N/A |
| 10419542 | Apex1         | 7  | N/A |
| 10419607 |               | 19 | N/A |
| 10419691 | Tox4          | 1  | N/A |
| 10419759 | Prmt5         | 19 | N/A |
| 10419803 | 4931414P19Rik | 1  | N/A |
| 10419872 |               | 19 | N/A |
| 10419966 | Zfhx2         | 1  | N/A |
| 10420165 | Cideb         | 7  | N/A |
| 10420348 | Zmym5         | 7  | N/A |
| 10420362 | Gjb2          | 7  | N/A |
| 10420372 |               | 13 | N/A |
| 10420413 | Lats2         | 13 | N/A |
| 10420516 |               | 19 | N/A |
| 10420591 |               | 19 | N/A |
| 10420631 | Ebpl          | 1  | N/A |

|          |               |    |     |
|----------|---------------|----|-----|
| 10420659 | 6330409N04Rik | 1  | N/A |
| 10420823 | Hmbox1        | 1  | N/A |
| 10421003 | Bnip3l        | 13 | N/A |
| 10421046 | Dock5         | 7  | N/A |
| 10421172 | Slc25a37      | 13 | N/A |
| 10421227 | 2610301G19Rik | 7  | N/A |
| 10421269 | Sorbs3        | 7  | N/A |
| 10421309 | Slc39a14      | 13 | N/A |
| 10421577 | Gm9779        | 19 | N/A |
| 10421817 | Narg1l        | 13 | N/A |
| 10421906 |               | 19 | N/A |
| 10421908 | Rps3a         | 19 | N/A |
| 10421917 | Pabpc4        | 13 | N/A |
| 10422013 | Klf12         | 1  | N/A |
| 10422164 | Ednrb         | 19 | N/A |
| 10422396 | Stk24         | 7  | N/A |
| 10422518 | Tmtc4         | 19 | N/A |
| 10422598 | Sepp1         | 19 | N/A |
| 10422728 | Dab2          | 1  | N/A |
| 10423005 | Ugt3a1        | 1  | N/A |
| 10423090 | Amacr         | 7  | N/A |
| 10423271 | Cdh18         | 19 | N/A |
| 10423333 | Fam134b       | 7  | N/A |
| 10423363 | Ank           | 13 | N/A |
| 10423568 | 5730407I07Rik | 1  | N/A |
| 10423805 | Atp6v1c1      | 13 | N/A |
| 10423941 | Ttc35         | 13 | N/A |
| 10423963 | Eny2          | 13 | N/A |
| 10424097 | Med30         | 7  | N/A |
| 10424105 | Colec10       | 1  | N/A |
| 10424140 | Col14a1       | 1  | N/A |
| 10424213 | Zhx2          | 1  | N/A |
| 10424250 | Snrpd2        | 19 | N/A |
| 10424260 | D15Ert621e    | 7  | N/A |
| 10424363 | Nsmce2        | 7  | N/A |
| 10424370 | Trib1         | 13 | N/A |
| 10424557 | Gm7125        | 19 | N/A |
| 10424577 | Chrac1        | 13 | N/A |
| 10424674 |               | 19 | N/A |
| 10424676 | Ly6e          | 1  | N/A |
| 10424695 | Gpihbp1       | 1  | N/A |
| 10424705 | 2810039B14Rik | 19 | N/A |
| 10424756 | Mapk15        | 1  | N/A |
| 10424781 | Grina         | 13 | N/A |
| 10424825 | Cyc1          | 19 | N/A |
| 10425018 | Rpl8          | 19 | N/A |
| 10425046 | LOC626711     | 19 | N/A |
| 10425078 | Mpst          | 1  | N/A |
| 10425116 | Cdc42ep1      | 13 | N/A |
| 10425158 | Pdxp          | 19 | N/A |
| 10425333 | Apobec3       | 1  | N/A |
| 10425430 | Tnrc6b        | 7  | N/A |
| 10425527 | Ep300         | 1  | N/A |
| 10425611 | Aco2          | 13 | N/A |
| 10425653 | 4930407I10Rik | 19 | N/A |
| 10425905 | Nup50         | 7  | N/A |
| 10426157 | Trabd         | 13 | N/A |
| 10426301 |               | 7  | N/A |
| 10426451 | Irak4         | 19 | N/A |
| 10426479 | Ano6          | 1  | N/A |
| 10426550 | Tmem106c      | 13 | N/A |
| 10426798 | Smarcd1       | 1  | N/A |
| 10427015 | Acvr1b        | 7  | N/A |
| 10427045 | 9430023L20Rik | 19 | N/A |
| 10427049 | 6030408B16Rik | 13 | N/A |
| 10427083 | Eif4b         | 7  | N/A |
| 10427131 | Soat2         | 7  | N/A |
| 10427162 | Mfsd5         | 19 | N/A |
| 10427214 | Sp1           | 1  | N/A |
| 10427241 | Pcbp2         | 7  | N/A |
| 10427290 | Hoxc8         | 19 | N/A |
| 10427334 |               | 19 | N/A |
| 10427665 |               | 19 | N/A |
| 10427742 | Gm8174        | 19 | N/A |
| 10427881 | Gm8341        | 19 | N/A |
| 10427883 |               | 19 | N/A |
| 10427895 | Basp1         | 19 | N/A |
| 10427997 | Ankrd33b      | 19 | N/A |
| 10428068 | Tspyl5        | 19 | N/A |
| 10428171 | Ankrd46       | 19 | N/A |
| 10428238 | Ubr5          | 13 | N/A |
| 10428302 | Klf10         | 13 | N/A |
| 10428328 | Slc25a32      | 13 | N/A |
| 10428336 | Ftl2          | 19 | N/A |

|          |               |    |     |
|----------|---------------|----|-----|
| 10428374 | Gm5470        | 19 | N/A |
| 10428561 | Rad21         | 7  | N/A |
| 10428698 | Sntb1         | 1  | N/A |
| 10428736 | Der1          | 1  | N/A |
| 10428839 | Gm5959        | 19 | N/A |
| 10428857 | Mtss1         | 13 | N/A |
| 10428877 | E430025E21Rik | 7  | N/A |
| 10428918 | D330050I23Rik | 19 | N/A |
| 10429140 | Ndrg1         | 1  | N/A |
| 10429216 | Fam135b       | 19 | N/A |
| 10429298 | Trappc9       | 1  | N/A |
| 10429674 | Tsta3         | 13 | N/A |
| 10429772 | Eppk1         | 7  | N/A |
| 10429843 | Parp10        | 7  | N/A |
| 10429972 | Cpsf1         | 1  | N/A |
| 10430105 | C030006K11Rik | 13 | N/A |
| 10430510 | Tmem184b      | 7  | N/A |
| 10430596 | Unc84b        | 7  | N/A |
| 10430669 |               | 19 | N/A |
| 10430723 |               | 19 | N/A |
| 10430739 | Dnajb7        | 13 | N/A |
| 10430770 | Tob2          | 13 | N/A |
| 10430834 | Naga          | 13 | N/A |
| 10430871 | Tdg           | 7  | N/A |
| 10430993 | 1700001L05Rik | 13 | N/A |
| 10430997 | Pacsin2       | 7  | N/A |
| 10431424 | Plxnb2        | 1  | N/A |
| 10431486 | Sbf1          | 7  | N/A |
| 10431528 | Lmf2          | 1  | N/A |
| 10431546 | Ncaph2        | 1  | N/A |
| 10431585 | Chkb          | 7  | N/A |
| 10431612 | Rabl2a        | 1  | N/A |
| 10431697 | Abcd2         | 7  | N/A |
| 10431894 | Slc38a2       | 7  | N/A |
| 10432101 | Senp1         | 7  | N/A |
| 10432236 | Rnd1          | 1  | N/A |
| 10432256 | Arf3          | 13 | N/A |
| 10432636 | BC004728      | 1  | N/A |
| 10433032 | Atf7          | 7  | N/A |
| 10433034 | Atf7          | 7  | N/A |
| 10433047 |               | 19 | N/A |
| 10433088 | Cbx5          | 19 | N/A |
| 10433101 | Gpr84         | 1  | N/A |
| 10433161 | Marcks1       | 19 | N/A |
| 10433199 | Zfp263        | 13 | N/A |
| 10433274 | Vasn          | 13 | N/A |
| 10433292 | Hmox2         | 13 | N/A |
| 10433445 | Abat          | 1  | N/A |
| 10433462 | Pmm2          | 13 | N/A |
| 10433472 | 1810013L24Rik | 7  | N/A |
| 10433478 |               | 19 | N/A |
| 10433639 | Mkl2          | 1  | N/A |
| 10433672 | Rrn3          | 13 | N/A |
| 10433717 |               | 19 | N/A |
| 10433776 | Snai2         | 7  | N/A |
| 10433792 |               | 19 | N/A |
| 10434029 | Lztr1         | 7  | N/A |
| 10434384 | Ap2m1         | 13 | N/A |
| 10434629 | Map3k13       | 19 | N/A |
| 10434675 | Dnajb11       | 19 | N/A |
| 10434689 | Ahsg          | 19 | N/A |
| 10434733 | Eif4a2        | 1  | N/A |
| 10434778 | Rtp4          | 1  | N/A |
| 10434782 | Lpp           | 1  | N/A |
| 10434869 | Ccdc50        | 7  | N/A |
| 10434934 | Bdh1          | 7  | N/A |
| 10434942 | Dlg1          | 7  | N/A |
| 10435024 | Rnf168        | 19 | N/A |
| 10435057 | Pcyt1a        | 19 | N/A |
| 10435305 | Itgb5         | 19 | N/A |
| 10435543 | Golgb1        | 7  | N/A |
| 10435617 | Rabl3         | 19 | N/A |
| 10435626 | Hgd           | 1  | N/A |
| 10435654 | Lrrc58        | 13 | N/A |
| 10435676 | Gsk3b         | 7  | N/A |
| 10435733 | Igsf11        | 1  | N/A |
| 10435769 | Zbtb20        | 13 | N/A |
| 10435787 |               | 7  | N/A |
| 10435821 | Nat13         | 19 | N/A |
| 10435897 | BC027231      | 13 | N/A |
| 10436037 |               | 19 | N/A |
| 10436239 | 2310061J03Rik | 13 | N/A |
| 10436251 |               | 19 | N/A |
| 10436348 | Tomm70a       | 13 | N/A |



|          |               |    |     |
|----------|---------------|----|-----|
| 10436500 | Gbe1          | 13 | N/A |
| 10436550 |               | 19 | N/A |
| 10436608 | Cxadr         | 19 | N/A |
| 10436666 | Jam2          | 1  | N/A |
| 10436708 | Usp16         | 7  | N/A |
| 10436800 | 1110008E08Rik | 19 | N/A |
| 10436945 | Slc5a3        | 19 | N/A |
| 10436983 | Dopey2        | 19 | N/A |
| 10437023 | Morc3         | 13 | N/A |
| 10437136 | Dyrk1a        | 7  | N/A |
| 10437160 | Ets2          | 13 | N/A |
| 10437239 |               | 19 | N/A |
| 10437332 | Crebbp        | 1  | N/A |
| 10437364 | Adcy9         | 7  | N/A |
| 10437499 | Glyr1         | 7  | N/A |
| 10437582 |               | 19 | N/A |
| 10437639 | Emp2          | 7  | N/A |
| 10437687 |               | 1  | N/A |
| 10437748 | Gspt1         | 13 | N/A |
| 10437852 | 4921513D23Rik | 19 | N/A |
| 10437963 | Fam128b       | 7  | N/A |
| 10438017 | Fgd4          | 19 | N/A |
| 10438071 | Ppil2         | 1  | N/A |
| 10438198 | Med15         | 7  | N/A |
| 10438328 | D16H22S680E   | 13 | N/A |
| 10438423 | Olfir165      | 19 | N/A |
| 10438460 | Parl          | 19 | N/A |
| 10438527 | Camk2n2       | 19 | N/A |
| 10438530 | Clcn2         | 13 | N/A |
| 10438572 | 2510009E07Rik | 19 | N/A |
| 10438575 | Ehhadh        | 1  | N/A |
| 10438621 | Tra2b         | 19 | N/A |
| 10438813 |               | 19 | N/A |
| 10439049 | Pigx          | 13 | N/A |
| 10439130 | Umps          | 19 | N/A |
| 10439239 | Dirc2         | 1  | N/A |
| 10439249 | Parp14        | 7  | N/A |
| 10439268 | Dtx3l         | 7  | N/A |
| 10439404 | Gm4324        | 1  | N/A |
| 10439409 | BC031361      | 19 | N/A |
| 10439455 | Adprh         | 1  | N/A |
| 10439498 |               | 7  | N/A |
| 10439532 | Qtrtd1        | 13 | N/A |
| 10439701 | Abhd10        | 7  | N/A |
| 10439895 | Alcam         | 7  | N/A |
| 10439960 | Cep97         | 19 | N/A |
| 10440158 | Olfir191      | 19 | N/A |
| 10440178 | Olfir204      | 19 | N/A |
| 10440186 | Crybg3        | 19 | N/A |
| 10440246 | Arl13b        | 1  | N/A |
| 10440284 |               | 13 | N/A |
| 10440300 |               | 19 | N/A |
| 10440406 | Nrip1         | 1  | N/A |
| 10440427 | D16Ert472e    | 19 | N/A |
| 10440522 | Adamts1       | 1  | N/A |
| 10440717 | Krtap6-1      | 19 | N/A |
| 10440929 | Gart          | 19 | N/A |
| 10441064 | Dscr3         | 1  | N/A |
| 10441107 | Psmg1         | 19 | N/A |
| 10441400 | Arid1b        | 1  | N/A |
| 10441436 | Snx9          | 13 | N/A |
| 10441509 | Ppp1r2        | 13 | N/A |
| 10441797 | Tcp1          | 19 | N/A |
| 10441864 | Mlit4         | 7  | N/A |
| 10442037 | Zfp97         | 1  | N/A |
| 10442057 | Riok2         | 19 | N/A |
| 10442155 | Ppp2r1a       | 1  | N/A |
| 10442219 | Zfp52         | 19 | N/A |
| 10442493 |               | 1  | N/A |
| 10442549 | Zfp598        | 13 | N/A |
| 10442596 | Sepx1         | 13 | N/A |
| 10442606 | 4930528F23Rik | 7  | N/A |
| 10442739 | Unkl          | 1  | N/A |
| 10442752 | 0610007P22Rik | 19 | N/A |
| 10442904 | Jmjd8         | 19 | N/A |
| 10443007 | EG240055      | 1  | N/A |
| 10443391 | Mapk14        | 13 | N/A |
| 10443421 | Brpf3         | 13 | N/A |
| 10443463 | Cdkn1a        | 1  | N/A |
| 10443482 | BC004004      | 1  | N/A |
| 10443527 | Pim1          | 7  | N/A |
| 10443550 | Rnf8          | 7  | N/A |
| 10443561 | 1300018I05Rik | 1  | N/A |
| 10443589 | Zfand3        | 7  | N/A |

|          |               |    |     |
|----------|---------------|----|-----|
| 10443596 | Gm9874        | 1  | N/A |
| 10443898 | Cyp4f15       | 1  | N/A |
| 10443918 | C920016K16Rik | 19 | N/A |
| 10444008 | Zfp414        | 1  | N/A |
| 10444524 |               | 7  | N/A |
| 10444656 |               | 19 | N/A |
| 10444761 | Bat1a         | 1  | N/A |
| 10444778 |               | 7  | N/A |
| 10444895 | Flot1         | 13 | N/A |
| 10444911 | Mdc1          | 1  | N/A |
| 10445033 | Trim26        | 7  | N/A |
| 10445139 | Olfrl110      | 19 | N/A |
| 10445338 | Enpp5         | 7  | N/A |
| 10445458 | Xpo5          | 7  | N/A |
| 10445531 | Zfp318        | 7  | N/A |
| 10445558 | BC048355      | 19 | N/A |
| 10445674 | Mrfap1        | 19 | N/A |
| 10445774 | B430306N03Rik | 7  | N/A |
| 10445796 | Ai314976      | 7  | N/A |
| 10445896 |               | 19 | N/A |
| 10445909 | Kat2b         | 13 | N/A |
| 10445941 | Gm4471        | 19 | N/A |
| 10445953 | Emr4          | 1  | N/A |
| 10446166 | Ndufa11       | 19 | N/A |
| 10446207 | Clpp          | 19 | N/A |
| 10446235 | Trip10        | 19 | N/A |
| 10446282 | Emr1          | 1  | N/A |
| 10446334 | Glcci1        | 7  | N/A |
| 10446376 | Man2a1        | 13 | N/A |
| 10446402 | Ppp4r1        | 13 | N/A |
| 10446581 | Zfp161        | 19 | N/A |
| 10446656 | Lpin2         | 13 | N/A |
| 10446693 | Wdr43         | 13 | N/A |
| 10446713 | Snord53       | 7  | N/A |
| 10446756 | Ypel5         | 7  | N/A |
| 10446771 | Lclat1        | 7  | N/A |
| 10446777 | Ehd3          | 1  | N/A |
| 10446965 | Rasgrp3       | 1  | N/A |
| 10447025 | Ccdc75        | 19 | N/A |
| 10447128 | Gm6594        | 19 | N/A |
| 10447239 | Abcg8         | 7  | N/A |
| 10447341 | Rhoq          | 7  | N/A |
| 10447354 | Txndc14       | 19 | N/A |
| 10447417 | Msh6          | 1  | N/A |
| 10447437 | Klraq1        | 1  | N/A |
| 10447483 | Nanp          | 7  | N/A |
| 10447486 |               | 19 | N/A |
| 10447904 | Unc93a        | 7  | N/A |
| 10448004 | Phf10         | 13 | N/A |
| 10448032 | Gm10510       | 19 | N/A |
| 10448192 | Gm6540        | 19 | N/A |
| 10448202 | Tpm4          | 19 | N/A |
| 10448262 | Zfp213        | 13 | N/A |
| 10448307 | Tnfrsf12a     | 13 | N/A |
| 10448455 | Atp6v0c       | 13 | N/A |
| 10448459 | Tbc1d24       | 13 | N/A |
| 10448495 | 160002H07Rik  | 13 | N/A |
| 10448700 | Gfer          | 1  | N/A |
| 10448743 | Fahd1         | 19 | N/A |
| 10448748 | Nubp2         | 19 | N/A |
| 10448811 | Cramp1l       | 7  | N/A |
| 10449471 | Srpk1         | 13 | N/A |
| 10449644 | Glo1          | 1  | N/A |
| 10449712 | Cbs           | 1  | N/A |
| 10449815 | Brd4          | 7  | N/A |
| 10449935 | Zfp870        | 19 | N/A |
| 10449989 | Zfp422        | 1  | N/A |
| 10449991 | Zfp81         | 1  | N/A |
| 10450126 | Brd2          | 13 | N/A |
| 10450296 | Skiv2l        | 7  | N/A |
| 10450325 | Cfb           | 19 | N/A |
| 10450435 | Csnk2b        | 13 | N/A |
| 10450675 | H2-T24        | 1  | N/A |
| 10450752 | Trim39        | 19 | N/A |
| 10450923 | Pgk2          | 19 | N/A |
| 10451004 | Cd2ap         | 1  | N/A |
| 10451123 | Slc29a1       | 1  | N/A |
| 10451395 | Klc4          | 13 | N/A |
| 10451495 | Ubr2          | 13 | N/A |
| 10451547 | Gm16494       | 19 | N/A |
| 10451818 | Sult1c2       | 13 | N/A |
| 10451879 | Zfp119        | 19 | N/A |
| 10451932 | Plin4         | 13 | N/A |
| 10451943 | Plin5         | 13 | N/A |

|          |               |    |     |
|----------|---------------|----|-----|
| 10452000 | Dpp9          | 1  | N/A |
| 10452030 | Plin3         | 7  | N/A |
| 10452228 | Khsrp         | 1  | N/A |
| 10452430 | Fbxl17        | 7  | N/A |
| 10452442 | AU016765      | 1  | N/A |
| 10452516 | Ankrd12       | 13 | N/A |
| 10452815 | Xdh           | 19 | N/A |
| 10452892 | Fam98a        | 13 | N/A |
| 10452980 | Eif2ak2       | 7  | N/A |
| 10453062 | Ati2          | 13 | N/A |
| 10453139 | Gm10190       | 19 | N/A |
| 10453178 | Map4k3        | 7  | N/A |
| 10453260 | Haa0          | 1  | N/A |
| 10453318 | Abcg5         | 7  | N/A |
| 10453334 | Lrpprc        | 13 | N/A |
| 10453399 | Srbd1         | 19 | N/A |
| 10453426 | Atp6v1e2      | 19 | N/A |
| 10453429 | Rhoq          | 13 | N/A |
| 10453512 |               | 13 | N/A |
| 10453573 | Olfrc3        | 19 | N/A |
| 10453575 | Cul2          | 1  | N/A |
| 10453604 | Bambi         | 19 | N/A |
| 10453738 | Fzd8          | 7  | N/A |
| 10453918 | 3110002H16Rik | 7  | N/A |
| 10454039 | Impact        | 19 | N/A |
| 10454077 | Taf4b         | 7  | N/A |
| 10454113 | Dsg1a         | 13 | N/A |
| 10454192 | Ttr           | 19 | N/A |
| 10454198 | Rnf125        | 1  | N/A |
| 10454202 | Rnf138        | 7  | N/A |
| 10454353 | Mocos         | 1  | N/A |
| 10454514 | Lims2         | 7  | N/A |
| 10454580 | Bin1          | 19 | N/A |
| 10454606 | Wdr36         | 19 | N/A |
| 10454851 | Cxxc5         | 1  | N/A |
| 10454877 | Pura          | 1  | N/A |
| 10454944 | Eif4ebp3      | 13 | N/A |
| 10454953 | Tmco6         | 7  | N/A |
| 10454966 | Ik            | 1  | N/A |
| 10455069 | Pcdhb6        | 13 | N/A |
| 10455259 | Arhgap26      | 1  | N/A |
| 10455472 | Dcp2          | 7  | N/A |
| 10455738 | Snx2          | 7  | N/A |
| 10455752 | Snx24         | 1  | N/A |
| 10455769 | Csnk1g3       | 13 | N/A |
| 10455784 | Gramd3        | 1  | N/A |
| 10455873 | Slc12a2       | 19 | N/A |
| 10455948 | Chsy3         | 1  | N/A |
| 10455974 | Dctn4         | 1  | N/A |
| 10455989 | Rbm22         | 7  | N/A |
| 10456046 | Pdgfrb        | 1  | N/A |
| 10456071 | Csf1r         | 1  | N/A |
| 10456361 | Gm9926        | 19 | N/A |
| 10456492 | D18Ert653e    | 7  | N/A |
| 10456522 | Tcf4          | 1  | N/A |
| 10456745 | Smad7         | 13 | N/A |
| 10456793 | Ier3ip1       | 19 | N/A |
| 10456970 |               | 1  | N/A |
| 10456974 | Arf1          | 13 | N/A |
| 10457114 | Bhmt          | 19 | N/A |
| 10457205 | Crem          | 1  | N/A |
| 10457380 |               | 19 | N/A |
| 10457637 |               | 19 | N/A |
| 10457644 | Cdh2          | 7  | N/A |
| 10457888 | 5730494M16Rik | 19 | N/A |
| 10457938 |               | 19 | N/A |
| 10457948 | Slc25a46      | 7  | N/A |
| 10458138 | Brd8          | 7  | N/A |
| 10458213 | Etf1          | 13 | N/A |
| 10458355 | Apbb3         | 7  | N/A |
| 10458398 | Hars          | 13 | N/A |
| 10458461 | Hdac3         | 7  | N/A |
| 10458534 | Pcdh1         | 7  | N/A |
| 10458547 | Gnpda1        | 1  | N/A |
| 10458583 | Yipf5         | 19 | N/A |
| 10458680 | Eif3j         | 19 | N/A |
| 10458755 | Ythdc2        | 1  | N/A |
| 10458882 | LOC674866     | 19 | N/A |
| 10458956 |               | 19 | N/A |
| 10458960 | Aldh7a1       | 19 | N/A |
| 10458992 | C330018D20Rik | 19 | N/A |
| 10459158 | Hmgxb3        | 13 | N/A |
| 10459193 | Ppargc1b      | 7  | N/A |
| 10459389 |               | 13 | N/A |

|          |               |    |     |
|----------|---------------|----|-----|
| 10459510 |               | 7  | N/A |
| 10459534 | Afg3l2        | 13 | N/A |
| 10459604 | 4933403F05Rik | 19 | N/A |
| 10459705 | Smad4         | 1  | N/A |
| 10459799 | 1700003O11Rik | 19 | N/A |
| 10459802 | Gm9028        | 19 | N/A |
| 10459930 | Ctdp1         | 7  | N/A |
| 10460196 | 1810055G02Rik | 13 | N/A |
| 10460255 | 1700055N04Rik | 19 | N/A |
| 10460259 | Aldh3b2       | 19 | N/A |
| 10460263 | Acy3          | 7  | N/A |
| 10460400 | Pcx           | 7  | N/A |
| 10460582 | Al837181      | 1  | N/A |
| 10460787 | Atg2a         | 7  | N/A |
| 10461164 | Wdr74         | 13 | N/A |
| 10461257 | Ubxn1         | 7  | N/A |
| 10461305 | B3gat3        | 1  | N/A |
| 10461423 | Fads3         | 19 | N/A |
| 10461475 | Cpsf7         | 7  | N/A |
| 10461526 | Vwce          | 7  | N/A |
| 10461587 | Ms4a4a        | 7  | N/A |
| 10461663 | Mrpl16        | 1  | N/A |
| 10461728 | Gm4952        | 7  | N/A |
| 10461909 | BC016495      | 13 | N/A |
| 10461991 | Zfand5        | 7  | N/A |
| 10461999 | Fam108b       | 13 | N/A |
| 10462130 | Fam122a       | 19 | N/A |
| 10462136 | Cyca          | 19 | N/A |
| 10462214 |               | 1  | N/A |
| 10462237 | Smarca2       | 13 | N/A |
| 10462621 | I830012O16Rik | 7  | N/A |
| 10462630 | Pank1         | 7  | N/A |
| 10462822 |               | 7  | N/A |
| 10462918 | Tmem20        | 13 | N/A |
| 10462922 | Plce1         | 13 | N/A |
| 10462973 | Hells         | 19 | N/A |
| 10463061 | Gm5827        | 13 | N/A |
| 10463068 |               | 13 | N/A |
| 10463140 | Lcor          | 19 | N/A |
| 10463211 | Pi4k2a        | 1  | N/A |
| 10463308 | Abcc2         | 7  | N/A |
| 10463343 | Gm10768       | 13 | N/A |
| 10463355 | Scd2          | 19 | N/A |
| 10463448 | Peo1          | 13 | N/A |
| 10463486 | Btrc          | 7  | N/A |
| 10463517 | Pprc1         | 13 | N/A |
| 10463661 | Trim8         | 13 | N/A |
| 10463739 | Taf5          | 7  | N/A |
| 10463751 | Pdcd11        | 13 | N/A |
| 10464045 | Acsf5         | 19 | N/A |
| 10464218 |               | 7  | N/A |
| 10464240 | Trub1         | 19 | N/A |
| 10464445 | Gm5521        | 19 | N/A |
| 10464504 | Lrp5          | 1  | N/A |
| 10464586 | Gstp1         | 7  | N/A |
| 10464601 |               | 1  | N/A |
| 10464659 | Rad9          | 1  | N/A |
| 10464672 | Ssh3          | 7  | N/A |
| 10464728 | Kdm2a         | 7  | N/A |
| 10464772 | 2010003K11Rik | 13 | N/A |
| 10464819 | Rbm14         | 13 | N/A |
| 10465054 | Ccdc85b       | 19 | N/A |
| 10465150 | Pcnxl3        | 7  | N/A |
| 10465226 | Scyl1         | 13 | N/A |
| 10465374 | Sac3d1        | 19 | N/A |
| 10465604 | Stip1         | 19 | N/A |
| 10465638 | Nat11         | 7  | N/A |
| 10465651 | Mark2         | 7  | N/A |
| 10465683 | Rab11b        | 7  | N/A |
| 10465895 | Fads2         | 13 | N/A |
| 10465916 | Gm98          | 1  | N/A |
| 10466008 | Dak           | 13 | N/A |
| 10466104 | Ccdc86        | 13 | N/A |
| 10466353 |               | 1  | N/A |
| 10466441 | Vps13a        | 19 | N/A |
| 10466676 | 1110059E24Rik | 13 | N/A |
| 10466935 | Rln1          | 19 | N/A |
| 10466963 | 9930021J03Rik | 1  | N/A |
| 10467003 | Gm5972        | 13 | N/A |
| 10467041 | Asah2         | 13 | N/A |
| 10467068 | Sgms1         | 7  | N/A |
| 10467088 |               | 19 | N/A |
| 10467102 | Rnls          | 1  | N/A |
| 10467216 | Cpeb3         | 7  | N/A |

|          |               |    |     |
|----------|---------------|----|-----|
| 10467319 | Rbp4          | 19 | N/A |
| 10467410 | Cyp2c70       | 19 | N/A |
| 10467420 |               | 1  | N/A |
| 10467489 | Ptp4a1        | 13 | N/A |
| 10467578 | Pik3ap1       | 7  | N/A |
| 10467766 | Loxl4         | 1  | N/A |
| 10467768 | Loxl4         | 1  | N/A |
| 10467956 | Bloc1s2       | 1  | N/A |
| 10467979 | Scd1          | 19 | N/A |
| 10468081 | Npm3          | 7  | N/A |
| 10468159 | Ldb1          | 13 | N/A |
| 10468231 | Arl3          | 1  | N/A |
| 10468292 | Pdcd11        | 7  | N/A |
| 10468309 | 2310014D11Rik | 1  | N/A |
| 10468533 |               | 19 | N/A |
| 10468691 | Ablim1        | 1  | N/A |
| 10468722 | Gfra1         | 13 | N/A |
| 10468795 | Rab11fip2     | 13 | N/A |
| 10469046 | Phyh          | 19 | N/A |
| 10469070 | Nudt5         | 13 | N/A |
| 10469145 | Kin           | 7  | N/A |
| 10469199 |               | 19 | N/A |
| 10469203 |               | 19 | N/A |
| 10469207 |               | 19 | N/A |
| 10469213 |               | 19 | N/A |
| 10469217 |               | 19 | N/A |
| 10469221 |               | 19 | N/A |
| 10469225 |               | 19 | N/A |
| 10469227 |               | 19 | N/A |
| 10469231 |               | 19 | N/A |
| 10469289 | Il15ra        | 7  | N/A |
| 10469358 | Mrc1          | 1  | N/A |
| 10469575 |               | 13 | N/A |
| 10469609 | Gm13375       | 13 | N/A |
| 10469816 | Il1rn         | 1  | N/A |
| 10469923 | Entpd8        | 7  | N/A |
| 10469941 |               | 7  | N/A |
| 10470050 | Abca2         | 1  | N/A |
| 10470268 | Pmpca         | 13 | N/A |
| 10470446 | Rxra          | 7  | N/A |
| 10470584 | Tsc1          | 7  | N/A |
| 10470628 | Ddx31         | 13 | N/A |
| 10470649 | Ttf1          | 19 | N/A |
| 10470816 | Gle1          | 7  | N/A |
| 10471045 | Ppp2r4        | 1  | N/A |
| 10471108 | Gpr107        | 7  | N/A |
| 10471154 | Ass1          | 19 | N/A |
| 10471191 | Exosc2        | 19 | N/A |
| 10471298 | Bat2l         | 7  | N/A |
| 10471337 | Pomt1         | 1  | N/A |
| 10471411 | Ptges2        | 13 | N/A |
| 10471424 | Fam102a       | 13 | N/A |
| 10471486 | Eng           | 1  | N/A |
| 10471599 | D730039F16Rik | 19 | N/A |
| 10471675 | Glo1          | 1  | N/A |
| 10471844 | Nek6          | 1  | N/A |
| 10472095 | Bloc1s2       | 1  | N/A |
| 10472199 | Upp2          | 13 | N/A |
| 10472366 | Scn2a1        | 1  | N/A |
| 10472501 | Lass6         | 13 | N/A |
| 10472514 | Nostrin       | 1  | N/A |
| 10472570 | Ppig          | 1  | N/A |
| 10472846 | Pdk1          | 19 | N/A |
| 10472893 | B230120H23Rik | 7  | N/A |
| 10472923 | Ak3l1         | 13 | N/A |
| 10472933 | Scrn3         | 19 | N/A |
| 10473008 | Hnrnpa3       | 19 | N/A |
| 10473097 | Plekha3       | 13 | N/A |
| 10473118 | Ube2e3        | 7  | N/A |
| 10473224 | Dusp19        | 1  | N/A |
| 10473356 | Ube2l6        | 1  | N/A |
| 10473363 | Timm10        | 13 | N/A |
| 10473367 | Slc43a1       | 13 | N/A |
| 10473454 | Olfir1008     | 19 | N/A |
| 10473483 | Olfir1029     | 13 | N/A |
| 10473515 |               | 19 | N/A |
| 10473624 | Olfir1257     | 1  | N/A |
| 10473760 | Cugbp1        | 7  | N/A |
| 10473847 | Acp2          | 1  | N/A |
| 10474028 |               | 7  | N/A |
| 10474064 | Trp53i11      | 1  | N/A |
| 10474102 |               | 19 | N/A |
| 10474141 | Slc1a2        | 13 | N/A |
| 10474181 | Abtb2         | 1  | N/A |

|          |               |    |     |
|----------|---------------|----|-----|
| 10474199 |               | 19 | N/A |
| 10474201 | Lmo2          | 1  | N/A |
| 10474411 | Lin7c         | 13 | N/A |
| 10475199 | Snap23        | 1  | N/A |
| 10475211 | Haus2         | 7  | N/A |
| 10475226 |               | 19 | N/A |
| 10475247 | Tmem62        | 1  | N/A |
| 10475264 | Ccndbp1       | 7  | N/A |
| 10475293 | Tubgcp4       | 1  | N/A |
| 10475350 | Serf2         | 19 | N/A |
| 10475360 | Mrpl51        | 13 | N/A |
| 10475362 | Wdr76         | 19 | N/A |
| 10475437 | Sord          | 19 | N/A |
| 10475623 | Fbn1          | 19 | N/A |
| 10475718 | Snmp200       | 7  | N/A |
| 10475800 | Adra2b        | 1  | N/A |
| 10475866 | Bcl2l11       | 7  | N/A |
| 10475941 | Zc3h6         | 7  | N/A |
| 10475957 | Ttl           | 13 | N/A |
| 10475965 | Polr1b        | 13 | N/A |
| 10475990 | Slc20a1       | 7  | N/A |
| 10476093 | Nop56         | 13 | N/A |
| 10476207 | Atrn          | 7  | N/A |
| 10476319 |               | 19 | N/A |
| 10476668 | Csrp2bp       | 19 | N/A |
| 10476759 | Rin2          | 1  | N/A |
| 10476928 | Gm14131       | 19 | N/A |
| 10476939 | Gm4979        | 1  | N/A |
| 10477012 | Fkbp1a        | 1  | N/A |
| 10477061 | Srxn1         | 7  | N/A |
| 10477090 | Tbc1d20       | 7  | N/A |
| 10477169 | Id1           | 13 | N/A |
| 10477311 | Asxl1         | 7  | N/A |
| 10477370 |               | 13 | N/A |
| 10477604 | Itch          | 13 | N/A |
| 10477852 | Gm14251       | 19 | N/A |
| 10477946 | Rpn2          | 19 | N/A |
| 10477986 | Nnat          | 1  | N/A |
| 10478196 | Top1          | 13 | N/A |
| 10478389 | Hnf4a         | 13 | N/A |
| 10478421 | Kcnk15        | 19 | N/A |
| 10478748 | Trp53rk       | 7  | N/A |
| 10478854 | Slc9a8        | 7  | N/A |
| 10478890 | Cebpb         | 13 | N/A |
| 10478928 | Tshz2         | 7  | N/A |
| 10478936 |               | 19 | N/A |
| 10478962 | 2010011I20Rik | 1  | N/A |
| 10479077 | Vapb          | 7  | N/A |
| 10479099 | Npepl1        | 7  | N/A |
| 10479154 | Tubb1         | 1  | N/A |
| 10479176 | Gm14391       | 19 | N/A |
| 10479203 | Gm14434       | 19 | N/A |
| 10479217 | Gm14434       | 13 | N/A |
| 10479221 |               | 13 | N/A |
| 10479228 | Etohi1        | 19 | N/A |
| 10479297 | Lsm14b        | 7  | N/A |
| 10479335 | Osbpl2        | 13 | N/A |
| 10479411 | Ogfr          | 13 | N/A |
| 10479458 | 2310003C23Rik | 13 | N/A |
| 10479490 | Arfgap1       | 7  | N/A |
| 10479639 | Dnajc5        | 13 | N/A |
| 10479736 | Polr3k        | 19 | N/A |
| 10479749 | Rpp38         | 13 | N/A |
| 10479775 | Hspa14        | 19 | N/A |
| 10479794 | Prpf18        | 7  | N/A |
| 10479833 | Optn          | 7  | N/A |
| 10480003 | Itih2         | 7  | N/A |
| 10480035 | Pfkfb3        | 13 | N/A |
| 10480347 | Pip4k2a       | 1  | N/A |
| 10480381 | Arhgap21      | 13 | N/A |
| 10480423 | Abi1          | 7  | N/A |
| 10480459 | Hnmt          | 13 | N/A |
| 10480601 | A830007P12Rik | 19 | N/A |
| 10480628 |               | 1  | N/A |
| 10481011 | Pmpca         | 1  | N/A |
| 10481128 | Med22         | 13 | N/A |
| 10481182 | Fam163b       | 19 | N/A |
| 10481186 | Sardh         | 19 | N/A |
| 10481210 | Vav2          | 7  | N/A |
| 10481378 |               | 19 | N/A |
| 10481393 | Zdhhc12       | 7  | N/A |
| 10481540 | Fnbp1         | 7  | N/A |
| 10481577 | Uck1          | 19 | N/A |
| 10481654 | Fpgs          | 1  | N/A |

|          |               |    |     |
|----------|---------------|----|-----|
| 10481804 | Ralgps1       | 19 | N/A |
| 10481868 | Dnajb6        | 13 | N/A |
| 10481909 | Fbxw2         | 7  | N/A |
| 10482004 | Al182371      | 1  | N/A |
| 10482030 | Stom          | 1  | N/A |
| 10482144 | Rc3h2         | 7  | N/A |
| 10482200 | Dennd1a       | 7  | N/A |
| 10482528 | Neb           | 7  | N/A |
| 10482712 | Stam2         | 7  | N/A |
| 10482793 |               | 7  | N/A |
| 10483023 | Rbms1         | 7  | N/A |
| 10483025 | Rbms1         | 7  | N/A |
| 10483110 | Ifih1         | 7  | N/A |
| 10483178 | Cobll1        | 7  | N/A |
| 10483559 | Gm16510       | 19 | N/A |
| 10483679 |               | 19 | N/A |
| 10483768 |               | 19 | N/A |
| 10484249 | Cwc22         | 1  | N/A |
| 10484256 | 4930401B11Rik | 19 | N/A |
| 10484371 | Calcr1        | 1  | N/A |
| 10484431 | Txndc14       | 19 | N/A |
| 10484457 | Clp1          | 19 | N/A |
| 10484541 | Olfr154       | 13 | N/A |
| 10484586 | Olfr1054      | 7  | N/A |
| 10484616 | Olfr1082      | 19 | N/A |
| 10484640 | Olfr1099      | 7  | N/A |
| 10484642 | Olfr1100      | 19 | N/A |
| 10484658 | Olfr1109      | 19 | N/A |
| 10484685 | Olfr1135      | 13 | N/A |
| 10484888 | Ptprj         | 1  | N/A |
| 10484894 | Ptprj         | 1  | N/A |
| 10485042 | Zfp408        | 7  | N/A |
| 10485170 | Cry2          | 7  | N/A |
| 10485225 | Ext2          | 1  | N/A |
| 10485277 |               | 19 | N/A |
| 10485282 | Alkbh3        | 1  | N/A |
| 10485340 | Itpa          | 1  | N/A |
| 10485344 | Api5          | 19 | N/A |
| 10485562 | Hipk3         | 7  | N/A |
| 10485582 | Tcp1111       | 1  | N/A |
| 10485607 | Qser1         | 7  | N/A |
| 10485622 | Qser1         | 7  | N/A |
| 10485635 | Eif3m         | 13 | N/A |
| 10485811 | Olfr1313      | 19 | N/A |
| 10486057 | Rab5b         | 1  | N/A |
| 10486172 | Fam82a2       | 19 | N/A |
| 10486201 | Gm14207       | 1  | N/A |
| 10486396 | Ehd4          | 19 | N/A |
| 10486710 | Lcmt2         | 1  | N/A |
| 10487154 | Secisbp2l     | 13 | N/A |
| 10487175 | Cops2         | 1  | N/A |
| 10487433 | Zfp661        | 19 | N/A |
| 10487748 | 4930402H24Rik | 1  | N/A |
| 10487823 |               | 1  | N/A |
| 10487890 | Erv3          | 13 | N/A |
| 10487906 | Slc23a2       | 7  | N/A |
| 10488010 | Hao1          | 19 | N/A |
| 10488048 | Mkks          | 19 | N/A |
| 10488382 | Cd93          | 1  | N/A |
| 10488441 | Zfp120        | 1  | N/A |
| 10488550 | Nanp          | 7  | N/A |
| 10488575 | Psmf1         | 7  | N/A |
| 10488630 | Defb23        | 19 | N/A |
| 10488722 | Comm7         | 1  | N/A |
| 10488844 | Ncoa6         | 1  | N/A |
| 10488879 | Gss           | 7  | N/A |
| 10489041 | Pdcd10        | 7  | N/A |
| 10489049 |               | 19 | N/A |
| 10489107 | Samhd1        | 1  | N/A |
| 10489364 | 3230401D17Rik | 1  | N/A |
| 10489368 | Fitm2         | 7  | N/A |
| 10489620 | Ncoa5         | 1  | N/A |
| 10489946 | Dpm1          | 19 | N/A |
| 10490246 | 3100002L24Rik | 19 | N/A |
| 10490250 | 3100002L24Rik | 19 | N/A |
| 10490276 | 2210418010Rik | 19 | N/A |
| 10490294 | Gm14434       | 19 | N/A |
| 10490299 |               | 19 | N/A |
| 10490352 | Taf4a         | 1  | N/A |
| 10490467 | Cables2       | 13 | N/A |
| 10490559 | Chrna4        | 19 | N/A |
| 10490632 | BC006779      | 1  | N/A |
| 10490838 | Fabp5         | 1  | N/A |
| 10490946 | Hsp90aa1      | 19 | N/A |

|          |               |    |     |
|----------|---------------|----|-----|
| 10490955 | Mtfr1         | 7  | N/A |
| 10490970 |               | 19 | N/A |
| 10491038 | Tbl1xr1       | 7  | N/A |
| 10491171 | Slc2a2        | 13 | N/A |
| 10491300 | Skil          | 19 | N/A |
| 10491455 | Fxr1          | 7  | N/A |
| 10491595 | 4932438A13Rik | 1  | N/A |
| 10491780 | Hspa4l        | 19 | N/A |
| 10491820 | 3110057O12Rik | 1  | N/A |
| 10491915 | Ccrn4l        | 13 | N/A |
| 10491962 | Foxo1         | 13 | N/A |
| 10492045 | Hnrrnpa3      | 19 | N/A |
| 10492091 | Smad9         | 7  | N/A |
| 10492195 | Tsc22d2       | 7  | N/A |
| 10492341 | 4631416L12Rik | 13 | N/A |
| 10492668 | 4930589L23Rik | 19 | N/A |
| 10492671 | Ppid          | 19 | N/A |
| 10492735 |               | 1  | N/A |
| 10492755 | Fga           | 1  | N/A |
| 10492860 | Higd1a        | 19 | N/A |
| 10492864 | Sh3d19        | 7  | N/A |
| 10492997 | Etv3          | 19 | N/A |
| 10493009 | Arhgef11      | 1  | N/A |
| 10493103 | Isg20l2       | 13 | N/A |
| 10493203 | 0610031J06Rik | 13 | N/A |
| 10493210 | Smg5          | 13 | N/A |
| 10493259 | Ssr2          | 19 | N/A |
| 10493309 | Rit1          | 1  | N/A |
| 10493335 |               | 1  | N/A |
| 10493345 |               | 1  | N/A |
| 10493494 | Efna3         | 1  | N/A |
| 10493565 | Adar          | 7  | N/A |
| 10493585 | Ube2q1        | 7  | N/A |
| 10493666 | Nup210l       | 7  | N/A |
| 10493711 | Crtc2         | 7  | N/A |
| 10493758 | Gatad2b       | 1  | N/A |
| 10493984 | Tchh          | 19 | N/A |
| 10494003 | Tdpoz3        | 19 | N/A |
| 10494114 | Selenbp1      | 19 | N/A |
| 10494137 | Pi4kb         | 7  | N/A |
| 10494208 |               | 7  | N/A |
| 10494271 | Ctss          | 1  | N/A |
| 10494322 | Anp32e        | 19 | N/A |
| 10494351 | Mtmr11        | 19 | N/A |
| 10494386 | Hist1h2an     | 19 | N/A |
| 10494390 | Hist2h2aa1    | 1  | N/A |
| 10494395 | Hist2h2aa1    | 1  | N/A |
| 10494423 | Hfe2          | 1  | N/A |
| 10494452 | Rbm8a         | 19 | N/A |
| 10494551 | Acp6          | 7  | N/A |
| 10494565 | Fmo5          | 13 | N/A |
| 10494595 | Notch2        | 1  | N/A |
| 10494664 | Wars2         | 1  | N/A |
| 10495094 | 6530418L21Rik | 1  | N/A |
| 10495134 | Gm4248        | 19 | N/A |
| 10495285 | Sort1         | 7  | N/A |
| 10495549 | Dbt           | 19 | N/A |
| 10495651 | Alg14         | 1  | N/A |
| 10495763 | Gclm          | 7  | N/A |
| 10495781 | Bcar3         | 19 | N/A |
| 10495933 | 4930422G04Rik | 19 | N/A |
| 10495991 |               | 19 | N/A |
| 10495993 | Elovl6        | 19 | N/A |
| 10496015 | Pla2g12a      | 7  | N/A |
| 10496077 | Agxt2l1       | 19 | N/A |
| 10496110 | Papss1        | 19 | N/A |
| 10496251 | Bdh2          | 13 | N/A |
| 10496338 | Ppp3ca        | 7  | N/A |
| 10496387 | Dnajb14       | 19 | N/A |
| 10496438 | Adh1          | 19 | N/A |
| 10496492 |               | 7  | N/A |
| 10496569 | Gbp6          | 7  | N/A |
| 10496605 | Ccbl2         | 19 | N/A |
| 10496621 | Gtf2b         | 7  | N/A |
| 10496748 | Syde2         | 19 | N/A |
| 10496796 | Ssx2ip        | 19 | N/A |
| 10496813 | Ctbs          | 7  | N/A |
| 10496825 | Uox           | 13 | N/A |
| 10496872 | Eitd1         | 1  | N/A |
| 10497066 | Zranb2        | 19 | N/A |
| 10497105 | Lrrc40        | 7  | N/A |
| 10497186 |               | 19 | N/A |
| 10497337 | Car1          | 13 | N/A |
| 10497379 | Gm10742       | 1  | N/A |



|          |               |    |     |
|----------|---------------|----|-----|
| 10497390 | Armc1         | 19 | N/A |
| 10497485 |               | 13 | N/A |
| 10497487 |               | 13 | N/A |
| 10497490 | Naaladl2      | 13 | N/A |
| 10497501 | Naaladl2      | 7  | N/A |
| 10497503 |               | 13 | N/A |
| 10497703 | Mrpl47        | 13 | N/A |
| 10497964 | Pgrmc2        | 1  | N/A |
| 10497971 | Scit1         | 7  | N/A |
| 10498018 | Pcdh18        | 1  | N/A |
| 10498038 | Elf2          | 7  | N/A |
| 10498313 | Pgk1          | 19 | N/A |
| 10498367 | P2ry13        | 1  | N/A |
| 10498401 |               | 19 | N/A |
| 10498407 |               | 19 | N/A |
| 10498413 |               | 13 | N/A |
| 10498593 | Gm412         | 19 | N/A |
| 10498597 | 1110032F04Rik | 19 | N/A |
| 10498599 | lft80         | 19 | N/A |
| 10498795 | Zfp114        | 19 | N/A |
| 10498827 | Fnip2         | 7  | N/A |
| 10498952 | Gucy1a3       | 1  | N/A |
| 10498978 | Lrat          | 1  | N/A |
| 10498990 | Gm10710       | 19 | N/A |
| 10499091 | Dear1         | 1  | N/A |
| 10499095 | Fam160a1      | 1  | N/A |
| 10499121 | Rps3a         | 19 | N/A |
| 10499130 | Rnu73b        | 7  | N/A |
| 10499372 | Slc25a44      | 13 | N/A |
| 10499431 | Syt11         | 1  | N/A |
| 10499536 | Efna1         | 1  | N/A |
| 10499655 | Il6ra         | 13 | N/A |
| 10499705 | Hax1          | 19 | N/A |
| 10499777 | Ints3         | 1  | N/A |
| 10499839 | Ilf2          | 7  | N/A |
| 10499948 | Lce3a         | 7  | N/A |
| 10499971 | Tdpoz1        | 19 | N/A |
| 10499975 | Tdpoz1        | 19 | N/A |
| 10500042 | Zfp687        | 7  | N/A |
| 10500054 | Psm4          | 1  | N/A |
| 10500283 | Aph1a         | 1  | N/A |
| 10500304 | Vps45         | 1  | N/A |
| 10500327 | Hist2h3c2     | 19 | N/A |
| 10500329 | Hist2h2aa1    | 1  | N/A |
| 10500445 | Chd1l         | 13 | N/A |
| 10500685 | Atp1a1        | 13 | N/A |
| 10500802 | Atg4a         | 19 | N/A |
| 10500870 | Gm5546        | 19 | N/A |
| 10500911 | Mov10         | 7  | N/A |
| 10500948 | Cttnbp2nl     | 1  | N/A |
| 10500960 | Ddx20         | 7  | N/A |
| 10501046 | Gm10673       | 19 | N/A |
| 10501063 | Cd53          | 1  | N/A |
| 10501183 | Eps8l3        | 19 | N/A |
| 10501199 | Gstm7         | 1  | N/A |
| 10501235 | Gstm4         | 1  | N/A |
| 10501282 | Cyb561d1      | 7  | N/A |
| 10501485 | Prmt6         | 19 | N/A |
| 10501608 |               | 13 | N/A |
| 10501661 | Sfrs3         | 19 | N/A |
| 10502042 | Alpk1         | 7  | N/A |
| 10502050 | Alpk1         | 7  | N/A |
| 10502052 | Alpk1         | 7  | N/A |
| 10502071 | 5730508B09Rik | 19 | N/A |
| 10502146 | Gar1          | 19 | N/A |
| 10502205 | Hadh          | 13 | N/A |
| 10502214 | Cyp2u1        | 7  | N/A |
| 10502417 | 2410002F23Rik | 7  | N/A |
| 10502522 | Hs2st1        | 1  | N/A |
| 10502655 | Cyr61         | 13 | N/A |
| 10502732 | Prkacb        | 13 | N/A |
| 10502766 | Lphn2         | 1  | N/A |
| 10502776 | Lphn2         | 1  | N/A |
| 10502949 |               | 1  | N/A |
| 10503023 | Cth           | 1  | N/A |
| 10503123 | Ubxn2b        | 1  | N/A |
| 10503172 | Chd7          | 19 | N/A |
| 10503174 | Chd7          | 13 | N/A |
| 10503178 | Chd7          | 13 | N/A |
| 10503180 | Chd7          | 19 | N/A |
| 10503186 | Chd7          | 13 | N/A |
| 10503188 | Chd7          | 13 | N/A |
| 10503190 | Chd7          | 13 | N/A |
| 10503194 | Chd7          | 19 | N/A |

|          |               |    |     |
|----------|---------------|----|-----|
| 10503196 | Chd7          | 19 | N/A |
| 10503198 | Chd7          | 13 | N/A |
| 10503200 | Chd7          | 13 | N/A |
| 10503202 | Chd7          | 13 | N/A |
| 10503210 | Chd7          | 13 | N/A |
| 10503214 | Chd7          | 19 | N/A |
| 10503218 | Chd7          | 19 | N/A |
| 10503220 | Chd7          | 19 | N/A |
| 10503222 | Chd7          | 13 | N/A |
| 10503643 | Ndufaf4       | 19 | N/A |
| 10503882 | Rngtt         | 19 | N/A |
| 10503917 | Akirin2       | 7  | N/A |
| 10503995 | Dnaja1        | 13 | N/A |
| 10504106 | Il11ra1       | 19 | N/A |
| 10504362 | Rgp1          | 13 | N/A |
| 10504375 | Npr2          | 13 | N/A |
| 10504466 | Gm12504       | 19 | N/A |
| 10504615 | E230008N13Rik | 19 | N/A |
| 10504656 |               | 19 | N/A |
| 10504817 | Tgfb1         | 7  | N/A |
| 10504865 | Invs          | 1  | N/A |
| 10504918 | Zfp189        | 13 | N/A |
| 10505187 | Ugcg          | 7  | N/A |
| 10505224 | Snx30         | 7  | N/A |
| 10505240 |               | 19 | N/A |
| 10505747 | Rraga         | 19 | N/A |
| 10505884 |               | 19 | N/A |
| 10505954 | Tek           | 1  | N/A |
| 10506004 | 9530080O11Rik | 19 | N/A |
| 10506154 | Alg6          | 7  | N/A |
| 10506201 | Ror1          | 1  | N/A |
| 10506213 | Ube2u         | 1  | N/A |
| 10506269 | Ak3l1         | 13 | N/A |
| 10506781 | 2010305A19Rik | 7  | N/A |
| 10506786 | Zcchc11       | 7  | N/A |
| 10506880 | Kti12         | 13 | N/A |
| 10506893 | Nrd1          | 19 | N/A |
| 10507011 | Dmrta2        | 19 | N/A |
| 10507238 | Lrrc41        | 1  | N/A |
| 10507347 | Tesk2         | 13 | N/A |
| 10507394 | Hectd3        | 7  | N/A |
| 10507500 | Slc6a9        | 13 | N/A |
| 10507529 | Med8          | 1  | N/A |
| 10507539 | Elovl1        | 19 | N/A |
| 10507551 | 2610528J11Rik | 1  | N/A |
| 10507657 | Foxj3         | 7  | N/A |
| 10507699 | Scmh1         | 1  | N/A |
| 10507775 |               | 19 | N/A |
| 10507851 | Pabpc4        | 13 | N/A |
| 10508149 | Tekt2         | 19 | N/A |
| 10508228 | Zmym6         | 19 | N/A |
| 10508382 | Ak2           | 19 | N/A |
| 10508608 | Pef1          | 1  | N/A |
| 10508663 | Laptm5        | 1  | N/A |
| 10508697 | Sfrs4         | 13 | N/A |
| 10508707 | Tmem200b      | 19 | N/A |
| 10508788 | Ahdcl1        | 1  | N/A |
| 10508800 | LOC433762     | 13 | N/A |
| 10508883 | 1810019J16Rik | 7  | N/A |
| 10508974 | Pafah2        | 19 | N/A |
| 10509218 | Zfp46         | 13 | N/A |
| 10509273 | Wnt4          | 19 | N/A |
| 10509500 | Hp1bp3        | 7  | N/A |
| 10509820 | Rcc2          | 13 | N/A |
| 10509947 | Arhgef19      | 19 | N/A |
| 10509965 | Epha2         | 13 | N/A |
| 10510061 | Pramef8       | 1  | N/A |
| 10510165 | Cdv3          | 13 | N/A |
| 10510219 |               | 13 | N/A |
| 10510221 |               | 13 | N/A |
| 10510305 | Mtor          | 7  | N/A |
| 10510391 | Srm           | 13 | N/A |
| 10510814 | BC046331      | 13 | N/A |
| 10511298 | 9430015G10Rik | 19 | N/A |
| 10511375 | Cyp7a1        | 7  | N/A |
| 10511382 | Nsmaf         | 7  | N/A |
| 10511416 | Tox           | 13 | N/A |
| 10511510 | Ints8         | 19 | N/A |
| 10511661 | Otud6b        | 13 | N/A |
| 10511703 |               | 7  | N/A |
| 10511865 | Ptges3        | 19 | N/A |
| 10511881 | Manea         | 7  | N/A |
| 10511886 | Bhmt          | 19 | N/A |
| 10511892 |               | 1  | N/A |

|          |               |    |     |
|----------|---------------|----|-----|
| 10512024 | Mobkl2b       | 7  | N/A |
| 10512061 | Taf9          | 7  | N/A |
| 10512067 | Ddx58         | 7  | N/A |
| 10512098 | Aptx          | 7  | N/A |
| 10512251 | Al464131      | 7  | N/A |
| 10512279 | Cntfr         | 19 | N/A |
| 10512514 | Tln1          | 1  | N/A |
| 10512574 | Gba2          | 7  | N/A |
| 10512682 |               | 19 | N/A |
| 10512709 | Mcart1        | 13 | N/A |
| 10512807 | Gabbr2        | 7  | N/A |
| 10512851 | Erp44         | 19 | N/A |
| 10512895 | Baat          | 19 | N/A |
| 10512904 | Aldob         | 19 | N/A |
| 10512935 |               | 13 | N/A |
| 10513141 | Ptpn3         | 1  | N/A |
| 10513166 | Ptpn3         | 1  | N/A |
| 10513190 | D630039A03Rik | 7  | N/A |
| 10513420 | Mup7          | 19 | N/A |
| 10513428 | Mup1          | 19 | N/A |
| 10513437 | Mup1          | 19 | N/A |
| 10513455 | Mup1          | 19 | N/A |
| 10513467 | Mup1          | 19 | N/A |
| 10513472 | Mup1          | 19 | N/A |
| 10513497 | Mup1          | 19 | N/A |
| 10513504 | Mup1          | 19 | N/A |
| 10513512 |               | 19 | N/A |
| 10513514 | Mup5          | 19 | N/A |
| 10513521 | Mup20         | 19 | N/A |
| 10513538 | Mup21         | 19 | N/A |
| 10513608 | Alad          | 13 | N/A |
| 10513803 |               | 19 | N/A |
| 10513955 |               | 19 | N/A |
| 10513957 | Ptpnd         | 19 | N/A |
| 10514133 | Ttc39b        | 7  | N/A |
| 10514221 | Plin2         | 7  | N/A |
| 10514329 | Ifnz          | 19 | N/A |
| 10514338 |               | 19 | N/A |
| 10514588 | IOC0044D17Rik | 19 | N/A |
| 10514732 | Slc35d1       | 13 | N/A |
| 10514912 | Dio1          | 13 | N/A |
| 10515028 | Zfyve9        | 13 | N/A |
| 10515051 | Osbpl9        | 13 | N/A |
| 10515113 |               | 19 | N/A |
| 10515220 |               | 7  | N/A |
| 10515293 | Llph          | 19 | N/A |
| 10515519 | Atp6v0b       | 19 | N/A |
| 10515574 | St3gal3       | 7  | N/A |
| 10515590 | Kdm4a         | 1  | N/A |
| 10515613 | Ptprf         | 1  | N/A |
| 10515692 | BC059842      | 1  | N/A |
| 10515694 | BC059842      | 1  | N/A |
| 10515698 | BC059842      | 1  | N/A |
| 10515702 | BC059842      | 1  | N/A |
| 10515704 | BC059842      | 1  | N/A |
| 10515708 | BC059842      | 1  | N/A |
| 10515712 | BC059842      | 1  | N/A |
| 10515716 | BC059842      | 1  | N/A |
| 10515729 | BC059842      | 1  | N/A |
| 10515731 | BC059842      | 1  | N/A |
| 10515733 | BC059842      | 19 | N/A |
| 10515735 | BC059842      | 1  | N/A |
| 10515737 | BC059842      | 19 | N/A |
| 10515797 | Tmem125       | 19 | N/A |
| 10515981 |               | 19 | N/A |
| 10516007 | Zmpste24      | 19 | N/A |
| 10516303 |               | 7  | N/A |
| 10516427 | Ncdn          | 13 | N/A |
| 10516466 | Zmym1         | 1  | N/A |
| 10516507 | Zscan20       | 19 | N/A |
| 10516520 | Zfp362        | 7  | N/A |
| 10516551 | S100bbp       | 7  | N/A |
| 10516678 | Kpna6         | 13 | N/A |
| 10516706 | Khdrbs1       | 7  | N/A |
| 10516823 | Epb4.1        | 13 | N/A |
| 10516867 | Gmeb1         | 1  | N/A |
| 10516884 | Trnau1ap      | 13 | N/A |
| 10516908 |               | 19 | N/A |
| 10516966 | BC013712      | 1  | N/A |
| 10516982 |               | 7  | N/A |
| 10517036 | Wdtd1         | 7  | N/A |
| 10517081 | Gm13213       | 7  | N/A |
| 10517083 | Pigv          | 1  | N/A |
| 10517090 | Arid1a        | 1  | N/A |

|          |               |    |     |
|----------|---------------|----|-----|
| 10517116 | Rps6ka1       | 7  | N/A |
| 10517141 |               | 13 | N/A |
| 10517312 | Tmem57        | 13 | N/A |
| 10517425 | Lypla2        | 7  | N/A |
| 10517436 | 1110049F12Rik | 1  | N/A |
| 10517513 | C1qc          | 1  | N/A |
| 10517540 | Zbtb40        | 19 | N/A |
| 10517587 | Alpl          | 13 | N/A |
| 10517682 | 2310028O11Rik | 19 | N/A |
| 10517892 | D4Ertd22e     | 19 | N/A |
| 10517996 | Plekhm2       | 7  | N/A |
| 10518019 | Ddi2          | 7  | N/A |
| 10518226 | Vps13d        | 13 | N/A |
| 10518300 | Tnfrsf1b      | 13 | N/A |
| 10518344 |               | 13 | N/A |
| 10518385 | Mfn2          | 13 | N/A |
| 10518473 | Fbxo6         | 1  | N/A |
| 10518532 | Tardbp        | 19 | N/A |
| 10518546 | Pex14         | 7  | N/A |
| 10518585 | Kif1b         | 7  | N/A |
| 10518642 | Ube4b         | 7  | N/A |
| 10518774 | Park7         | 19 | N/A |
| 10518781 | Per3          | 13 | N/A |
| 10519177 |               | 19 | N/A |
| 10519488 |               | 1  | N/A |
| 10519642 | Gm4959        | 19 | N/A |
| 10520080 | Rint1         | 13 | N/A |
| 10520096 | Klhl7         | 19 | N/A |
| 10520124 | Sumo2         | 13 | N/A |
| 10520154 | Abcb8         | 7  | N/A |
| 10520187 | Slc4a2        | 13 | N/A |
| 10520250 | Nub1          | 1  | N/A |
| 10520362 | Insig1        | 19 | N/A |
| 10520371 | Prr8          | 7  | N/A |
| 10520379 | Prr8          | 7  | N/A |
| 10520390 |               | 19 | N/A |
| 10520513 | 4930471M23Rik | 7  | N/A |
| 10520612 | Khk           | 19 | N/A |
| 10520718 | Snx17         | 13 | N/A |
| 10520734 | Nrbp1         | 7  | N/A |
| 10520862 | Fosl2         | 19 | N/A |
| 10521031 | Ywhah         | 13 | N/A |
| 10521111 | Fgfr3         | 7  | N/A |
| 10521182 | BC037112      | 1  | N/A |
| 10521205 | Sh3bp2        | 13 | N/A |
| 10521587 |               | 13 | N/A |
| 10521757 |               | 19 | N/A |
| 10521824 | Sod3          | 1  | N/A |
| 10521830 |               | 13 | N/A |
| 10521832 | Pi4k2b        | 19 | N/A |
| 10521907 | 1810013D10Rik | 1  | N/A |
| 10521927 | Tbc1d19       | 7  | N/A |
| 10521950 | Stim2         | 13 | N/A |
| 10521966 | Papd4         | 7  | N/A |
| 10521984 | G6pd2         | 1  | N/A |
| 10522127 | Klb           | 7  | N/A |
| 10522250 | Tmem33        | 19 | N/A |
| 10522265 | Slc30a9       | 13 | N/A |
| 10522301 | Cmpk1         | 19 | N/A |
| 10522430 | Dcun1d4       | 7  | N/A |
| 10522472 | Fip1l1        | 1  | N/A |
| 10522589 | Srd5a3        | 7  | N/A |
| 10522596 | Tmem165       | 19 | N/A |
| 10522606 | Exoc1         | 1  | N/A |
| 10522716 | Polr2b        | 19 | N/A |
| 10523062 | Alb           | 19 | N/A |
| 10523206 | Uso1          | 19 | N/A |
| 10523245 | Gm1381        | 13 | N/A |
| 10523255 | Stbd1         | 7  | N/A |
| 10523281 | Sept11        | 1  | N/A |
| 10523297 | Ccng2         | 1  | N/A |
| 10523359 | Cxcl13        | 1  | N/A |
| 10523451 | Anxa3         | 1  | N/A |
| 10523481 |               | 1  | N/A |
| 10523727 | Pkd2          | 19 | N/A |
| 10523758 | Lrrc8b        | 13 | N/A |
| 10523901 |               | 7  | N/A |
| 10523903 |               | 19 | N/A |
| 10524004 | Pcgf3         | 7  | N/A |
| 10524052 | Fgfr1l        | 13 | N/A |
| 10524327 | Mn1           | 7  | N/A |
| 10524345 | Tpst2         | 19 | N/A |
| 10524460 | Acacb         | 19 | N/A |
| 10524525 | Ube3b         | 13 | N/A |

|          |               |    |     |
|----------|---------------|----|-----|
| 10524631 | Oasl1         | 1  | N/A |
| 10524647 | Sspl3         | 1  | N/A |
| 10524703 | Pxn           | 7  | N/A |
| 10524723 | Gcn1l1        | 1  | N/A |
| 10524973 | 2410131K14Rik | 19 | N/A |
| 10524983 | Med13l        | 7  | N/A |
| 10525016 | Tbx3          | 7  | N/A |
| 10525187 | Rpl6          | 13 | N/A |
| 10525313 | Atxn2         | 7  | N/A |
| 10525374 | Pptc7         | 13 | N/A |
| 10525439 | P2rx4         | 7  | N/A |
| 10525473 | Tmem120b      | 13 | N/A |
| 10525804 |               | 13 | N/A |
| 10525887 | Bri3bp        | 1  | N/A |
| 10525942 | Glt1d1        | 13 | N/A |
| 10526014 | Sfrs8         | 7  | N/A |
| 10526069 | Cct6a         | 19 | N/A |
| 10526098 | Scand3        | 7  | N/A |
| 10526106 | Vkorc1l1      | 13 | N/A |
| 10526113 | Crcp          | 19 | N/A |
| 10526169 | Caln1         | 13 | N/A |
| 10526181 | Gatsl2        | 1  | N/A |
| 10526191 | Gatsl2        | 1  | N/A |
| 10526232 | Wbscr27       | 7  | N/A |
| 10526241 | Cldn3         | 1  | N/A |
| 10526277 | Mlxipl        | 1  | N/A |
| 10526302 | Tbi2          | 19 | N/A |
| 10526487 | Alkbh4        | 13 | N/A |
| 10526564 | Ufsp1         | 13 | N/A |
| 10526566 | Ephb4         | 7  | N/A |
| 10526656 | Lrch4         | 1  | N/A |
| 10526687 | 2010007H12Rik | 7  | N/A |
| 10526743 | Cops6         | 19 | N/A |
| 10526772 | Cnpy4         | 19 | N/A |
| 10526882 | Heatr2        | 7  | N/A |
| 10526923 | 1110007L15Rik | 13 | N/A |
| 10526972 | Nudt1         | 1  | N/A |
| 10526977 | Eif3b         | 19 | N/A |
| 10527026 | AA881470      | 7  | N/A |
| 10527099 |               | 19 | N/A |
| 10527101 | Foxk1         | 7  | N/A |
| 10527158 | Fscn1         | 1  | N/A |
| 10527252 | Eif2ak1       | 13 | N/A |
| 10527340 | Trrap         | 7  | N/A |
| 10527423 | Trrap         | 7  | N/A |
| 10527508 | Cdk8          | 7  | N/A |
| 10527598 | Pomp          | 13 | N/A |
| 10527624 | Uspl1         | 13 | N/A |
| 10527646 | BC028471      | 19 | N/A |
| 10528102 | Crot          | 1  | N/A |
| 10528170 | Cycs          | 19 | N/A |
| 10528238 | Phtf2         | 13 | N/A |
| 10528385 | Reln          | 1  | N/A |
| 10528507 | Pus7          | 13 | N/A |
| 10528913 | Gm5129        | 19 | N/A |
| 10529041 | Preb          | 19 | N/A |
| 10529252 | C330019G07Rik | 1  | N/A |
| 10529264 | Spon2         | 1  | N/A |
| 10529445 | Lrpap1        | 13 | N/A |
| 10529547 |               | 13 | N/A |
| 10529567 | D5Erttd579e   | 19 | N/A |
| 10529577 | Cno           | 19 | N/A |
| 10529671 | Slc2a9        | 7  | N/A |
| 10529797 |               | 13 | N/A |
| 10529873 | Rab2a         | 19 | N/A |
| 10529875 | Ldb2          | 1  | N/A |
| 10529895 | Qdpr          | 1  | N/A |
| 10529957 | Gpr125        | 1  | N/A |
| 10530017 |               | 19 | N/A |
| 10530194 |               | 19 | N/A |
| 10530692 | Kdr           | 1  | N/A |
| 10530731 | Srd5a3        | 19 | N/A |
| 10530806 | Ppat          | 13 | N/A |
| 10530841 | Igfbp7        | 1  | N/A |
| 10531100 | Sult1d1       | 19 | N/A |
| 10531133 | Grsf1         | 7  | N/A |
| 10531149 | Gc            | 19 | N/A |
| 10531286 | Vdac2         | 13 | N/A |
| 10531370 | Naaa          | 1  | N/A |
| 10531560 | Antxr2        | 19 | N/A |
| 10531796 | Wdfy3         | 7  | N/A |
| 10531994 | Mpa2l         | 1  | N/A |
| 10532308 | Golga7        | 19 | N/A |
| 10532368 | 2410025L10Rik | 7  | N/A |

|          |               |    |     |
|----------|---------------|----|-----|
| 10532472 | Ulk1          | 7  | N/A |
| 10532584 | Myo18b        | 19 | N/A |
| 10532669 | 2900026A02Rik | 7  | N/A |
| 10532753 | Coro1c        | 7  | N/A |
| 10532921 | Sppl3         | 19 | N/A |
| 10532965 | Rnf10         | 7  | N/A |
| 10532989 | Gatc          | 1  | N/A |
| 10533304 | Trafd1        | 7  | N/A |
| 10533323 | Adam1a        | 13 | N/A |
| 10533345 | Aldh2         | 7  | N/A |
| 10533751 | Pitpnm2       | 13 | N/A |
| 10533929 | Scarb1        | 1  | N/A |
| 10534120 | Asl           | 13 | N/A |
| 10534301 | Gm52          | 19 | N/A |
| 10534575 | Prkrip1       | 19 | N/A |
| 10534921 | Mepce         | 7  | N/A |
| 10535381 | Actb          | 1  | N/A |
| 10535389 | Rnf216        | 7  | N/A |
| 10535410 |               | 19 | N/A |
| 10535508 | AU022870      | 13 | N/A |
| 10535559 | Baiap211      | 13 | N/A |
| 10535586 | Smurf1        | 7  | N/A |
| 10535776 | Prhoxnb       | 13 | N/A |
| 10535841 | Slc46a3       | 13 | N/A |
| 10535883 | Katnal1       | 19 | N/A |
| 10535904 | Hsph1         | 13 | N/A |
| 10535938 | N4bp211       | 13 | N/A |
| 10536481 | Gm3148        | 7  | N/A |
| 10536494 | Cav2          | 13 | N/A |
| 10536593 | Tsen15        | 19 | N/A |
| 10536743 | 6530409C15Rik | 19 | N/A |
| 10536762 | Snd1          | 19 | N/A |
| 10536931 | Ahcyl2        | 19 | N/A |
| 10536994 |               | 19 | N/A |
| 10537062 | Mest          | 1  | N/A |
| 10537227 | Tmem140       | 1  | N/A |
| 10537316 | Atp6v0c       | 13 | N/A |
| 10537347 | Gm7504        | 19 | N/A |
| 10537437 | Gm10244       | 19 | N/A |
| 10537728 | Casp2         | 1  | N/A |
| 10537770 | Zyx           | 13 | N/A |
| 10537834 | Arhgef5       | 1  | N/A |
| 10537849 | Arhgef5       | 1  | N/A |
| 10538100 | Repin1        | 1  | N/A |
| 10538123 | Gimap9        | 19 | N/A |
| 10538356 | Chn2          | 13 | N/A |
| 10538394 | Plekha8       | 13 | N/A |
| 10538413 | Znrf2         | 1  | N/A |
| 10538588 |               | 19 | N/A |
| 10538640 | Abcg2         | 19 | N/A |
| 10538753 | Snx10         | 13 | N/A |
| 10538857 | Serbp1        | 19 | N/A |
| 10538927 | Amd1          | 13 | N/A |
| 10538932 | Amd1          | 13 | N/A |
| 10538970 | Krcc1         | 7  | N/A |
| 10539042 | Polr1a        | 13 | N/A |
| 10539080 | St3gal5       | 13 | N/A |
| 10539421 | Mobk11b       | 1  | N/A |
| 10539579 | Gm5878        | 19 | N/A |
| 10539617 | Alms1         | 1  | N/A |
| 10539649 | Ptges3        | 19 | N/A |
| 10539861 | Rpn1          | 19 | N/A |
| 10539975 | V1ra7         | 19 | N/A |
| 10540034 | Aldh111       | 19 | N/A |
| 10540072 | Ppp1r2        | 13 | N/A |
| 10540075 | Hdac11        | 7  | N/A |
| 10540191 | Nr2c2         | 7  | N/A |
| 10540408 | Itpr1         | 13 | N/A |
| 10540472 | Bhlhe40       | 13 | N/A |
| 10540579 | Mtmr14        | 7  | N/A |
| 10541034 | Anubl1        | 19 | N/A |
| 10541071 | 8430408G22Rik | 1  | N/A |
| 10541091 | Gemin6        | 19 | N/A |
| 10541112 | Lasp1         | 1  | N/A |
| 10541260 | Cecr2         | 7  | N/A |
| 10541279 | Bcl2l13       | 7  | N/A |
| 10541301 | Tuba8         | 19 | N/A |
| 10541491 | 1700063H04Rik | 19 | N/A |
| 10541771 | Ing4          | 19 | N/A |
| 10541845 | Nop2          | 13 | N/A |
| 10541885 | Scnn1a        | 1  | N/A |
| 10541895 | Tnfrsf1a      | 7  | N/A |
| 10542164 | Clec12a       | 1  | N/A |
| 10542251 | Tas2r116      | 13 | N/A |

|          |               |    |     |
|----------|---------------|----|-----|
| 10542302 | Crebl2        | 19 | N/A |
| 10542340 | 8430419L09Rik | 13 | N/A |
| 10542636 | Pyroxd1       | 7  | N/A |
| 10542731 | Rassf8        | 1  | N/A |
| 10542762 | Gm6266        | 19 | N/A |
| 10542880 | 4833442J19Rik | 19 | N/A |
| 10542911 | Samd9l        | 1  | N/A |
| 10542949 |               | 19 | N/A |
| 10542953 | Tfpi2         | 1  | N/A |
| 10543031 | Slc25a13      | 13 | N/A |
| 10543226 | 2610001J05Rik | 7  | N/A |
| 10543306 | Tspan12       | 7  | N/A |
| 10543333 | Aass          | 19 | N/A |
| 10543448 | Wasl          | 7  | N/A |
| 10543524 | Gcc1          | 19 | N/A |
| 10543650 | Tnpo3         | 19 | N/A |
| 10543676 | 1700080G18Rik | 19 | N/A |
| 10543737 | Copg2         | 7  | N/A |
| 10543846 | Slc35b4       | 19 | N/A |
| 10544133 | Parp12        | 7  | N/A |
| 10544417 | Epha1         | 7  | N/A |
| 10544525 | Pdia4         | 1  | N/A |
| 10544547 | Zfp777        | 7  | N/A |
| 10544629 | Tra2a         | 19 | N/A |
| 10544906 | Ggct          | 19 | N/A |
| 10545121 | V1rc11        | 19 | N/A |
| 10545458 | Tcf3          | 1  | N/A |
| 10545651 | Ino80b        | 1  | N/A |
| 10545682 |               | 7  | N/A |
| 10545692 | Tet3          | 7  | N/A |
| 10545720 | Stambp        | 1  | N/A |
| 10545731 | Clec4f        | 1  | N/A |
| 10545751 | Tex261        | 13 | N/A |
| 10545760 | Paip2b        | 19 | N/A |
| 10545835 | 1700040I03Rik | 13 | N/A |
| 10546054 |               | 19 | N/A |
| 10546056 | Rab43         | 13 | N/A |
| 10546294 | Nup210        | 7  | N/A |
| 10546661 | Foxp1         | 1  | N/A |
| 10546685 | Eif4e3        | 13 | N/A |
| 10546760 | Ddx3x         | 19 | N/A |
| 10546967 | Sec13         | 13 | N/A |
| 10547251 | Bms1          | 19 | N/A |
| 10547408 | Erc1          | 19 | N/A |
| 10547436 | Wnk1          | 1  | N/A |
| 10547531 |               | 13 | N/A |
| 10547621 | Apobec1       | 1  | N/A |
| 10547769 | Ptpn6         | 19 | N/A |
| 10547795 | Rnu7          | 7  | N/A |
| 10547976 |               | 13 | N/A |
| 10548000 | Ltbr          | 13 | N/A |
| 10548011 | Plekhg6       | 7  | N/A |
| 10548038 | Ntf3          | 19 | N/A |
| 10548194 |               | 19 | N/A |
| 10548207 | Pzp           | 19 | N/A |
| 10548563 |               | 13 | N/A |
| 10548614 | Tas2r114      | 19 | N/A |
| 10548701 | Lrp6          | 7  | N/A |
| 10548808 |               | 1  | N/A |
| 10548815 | Coq2          | 19 | N/A |
| 10548857 | Hist4h4       | 19 | N/A |
| 10549079 | Gys2          | 13 | N/A |
| 10549282 | Itpr2         | 19 | N/A |
| 10549497 | Fam60a        | 19 | N/A |
| 10549504 | Dennd5b       | 7  | N/A |
| 10549506 | Dennd5b       | 7  | N/A |
| 10549615 | Leng8         | 7  | N/A |
| 10549653 | Atp6v0c       | 13 | N/A |
| 10549700 | Suv420h2      | 1  | N/A |
| 10549760 | Zfp580        | 7  | N/A |
| 10549921 | Vmn2r43       | 19 | N/A |
| 10549976 | Gm4157        | 19 | N/A |
| 10549979 | Tpm3          | 19 | N/A |
| 10550345 | Strn4         | 7  | N/A |
| 10550826 | V1rd20        | 13 | N/A |
| 10551069 | Zfp526        | 7  | N/A |
| 10551197 | Cyp2b10       | 19 | N/A |
| 10551423 |               | 7  | N/A |
| 10551469 | Dyrk1b        | 7  | N/A |
| 10551487 | Eid2b         | 1  | N/A |
| 10551554 | Sars2         | 7  | N/A |
| 10551600 | Hnrnpl        | 7  | N/A |
| 10552071 | Tmem162       | 19 | N/A |
| 10552097 |               | 19 | N/A |

|          |               |    |     |
|----------|---------------|----|-----|
| 10552106 |               | 19 | N/A |
| 10552108 |               | 19 | N/A |
| 10552140 | Cebpa         | 7  | N/A |
| 10552210 | Ankrd27       | 13 | N/A |
| 10552240 | Zfp507        | 19 | N/A |
| 10552311 | Gm15470       | 19 | N/A |
| 10552358 | C330019L16Rik | 19 | N/A |
| 10552587 | Klk1b21       | 1  | N/A |
| 10552656 | Syt3          | 19 | N/A |
| 10552672 | Aspdh         | 1  | N/A |
| 10552681 | Josd2         | 1  | N/A |
| 10552715 | 2310016G11Rik | 19 | N/A |
| 10552760 | Pnkp          | 1  | N/A |
| 10552824 | Rras          | 7  | N/A |
| 10553140 | Tmem143       | 7  | N/A |
| 10553163 | Nomo1         | 13 | N/A |
| 10553280 | Gtf2h1        | 13 | N/A |
| 10553413 | Prmt3         | 19 | N/A |
| 10553811 |               | 19 | N/A |
| 10553935 | Tarsi2        | 19 | N/A |
| 10554057 | Adamts17      | 19 | N/A |
| 10554081 | Ttc23         | 19 | N/A |
| 10554156 | Fam174b       | 19 | N/A |
| 10554475 | Zfp592        | 1  | N/A |
| 10554549 | Whamm         | 7  | N/A |
| 10554574 | Tm6sf1        | 1  | N/A |
| 10554693 | Stard5        | 19 | N/A |
| 10554752 | Nox4          | 7  | N/A |
| 10554837 | Eed           | 1  | N/A |
| 10555009 |               | 19 | N/A |
| 10555039 | Kctd21        | 1  | N/A |
| 10555179 | Prkrir        | 19 | N/A |
| 10555303 | Pgm2l1        | 13 | N/A |
| 10555425 | Fam168a       | 1  | N/A |
| 10555470 | Arap1         | 1  | N/A |
| 10555548 |               | 19 | N/A |
| 10555590 | Numa1         | 1  | N/A |
| 10555773 | Olfir593      | 19 | N/A |
| 10556039 | Olfir17       | 19 | N/A |
| 10556082 | Ppfbp2        | 7  | N/A |
| 10556216 | Ipo7          | 13 | N/A |
| 10556266 | Wee1          | 13 | N/A |
| 10556658 | 9030624J02Rik | 7  | N/A |
| 10556769 | Acsn3         | 13 | N/A |
| 10556828 | Anks4b        | 7  | N/A |
| 10556957 | BC030336      | 13 | N/A |
| 10557009 | Eef2k         | 13 | N/A |
| 10557035 | Polr3e        | 13 | N/A |
| 10557148 | Dctn5         | 1  | N/A |
| 10557213 | Rbbp6         | 7  | N/A |
| 10557300 | Aqp8          | 19 | N/A |
| 10557326 | Il4ra         | 19 | N/A |
| 10557355 | D430042O09Rik | 1  | N/A |
| 10557357 | D430042O09Rik | 1  | N/A |
| 10557361 | D430042O09Rik | 7  | N/A |
| 10557374 |               | 1  | N/A |
| 10557394 | D430042O09Rik | 7  | N/A |
| 10557399 | Sbk1          | 13 | N/A |
| 10557631 | Prr14         | 1  | N/A |
| 10557644 | Fbrs          | 1  | N/A |
| 10557655 | Srcap         | 7  | N/A |
| 10557705 | Phkg2         | 13 | N/A |
| 10557716 | Rnf40         | 7  | N/A |
| 10557758 | Setd1a        | 1  | N/A |
| 10557782 | Hsd3b7        | 7  | N/A |
| 10557793 | Stx4a         | 1  | N/A |
| 10557843 | Fus           | 7  | N/A |
| 10558057 | Brwd2         | 7  | N/A |
| 10558090 | Tacc2         | 1  | N/A |
| 10558265 | 2310007H09Rik | 7  | N/A |
| 10558297 | 2700050L05Rik | 13 | N/A |
| 10558583 | Zfp511        | 1  | N/A |
| 10558673 | Cyp2e1        | 19 | N/A |
| 10558740 | Gm15542       | 19 | N/A |
| 10558754 | Athl1         | 7  | N/A |
| 10558880 | Eps8l2        | 1  | N/A |
| 10558971 | Ap2a2         | 1  | N/A |
| 10559310 |               | 19 | N/A |
| 10559436 | Mboat7        | 1  | N/A |
| 10559516 | Rdh13         | 13 | N/A |
| 10559606 | Tmem86b       | 1  | N/A |
| 10559610 | Saps1         | 7  | N/A |
| 10559708 | Fiz1          | 7  | N/A |
| 10559762 |               | 19 | N/A |



|          |               |    |     |
|----------|---------------|----|-----|
| 10560023 | Zfp551        | 19 | N/A |
| 10560091 | V1rk1         | 19 | N/A |
| 10560160 | Obox3         | 19 | N/A |
| 10560202 | Gltscr1       | 1  | N/A |
| 10560260 | Sae1          | 19 | N/A |
| 10560313 |               | 19 | N/A |
| 10560395 |               | 19 | N/A |
| 10560431 | Foxa3         | 13 | N/A |
| 10560672 | Cblc          | 1  | N/A |
| 10560818 | Zfp111        | 19 | N/A |
| 10560826 | Zfp109        | 1  | N/A |
| 10560993 | Gsk3a         | 13 | N/A |
| 10561004 | Erf           | 7  | N/A |
| 10561059 | Gm7092        | 19 | N/A |
| 10561085 | Hnrnpul1      | 1  | N/A |
| 10561323 | Map3k10       | 19 | N/A |
| 10561525 | Gm10648       | 19 | N/A |
| 10561527 | Actn4         | 1  | N/A |
| 10561907 | Sdhaf1        | 13 | N/A |
| 10562005 | Wbp7          | 7  | N/A |
| 10562416 | Cebpg         | 13 | N/A |
| 10562491 | Pdcd5         | 19 | N/A |
| 10562548 | C80913        | 7  | N/A |
| 10562563 | Ccne1         | 13 | N/A |
| 10562578 | Pop4          | 7  | N/A |
| 10562651 |               | 7  | N/A |
| 10562847 | Nr1h2         | 7  | N/A |
| 10562905 | Atf5          | 1  | N/A |
| 10562942 | Med25         | 13 | N/A |
| 10563014 | Prmt1         | 13 | N/A |
| 10563050 | Prr12         | 1  | N/A |
| 10563110 | Snord34       | 7  | N/A |
| 10563112 | Snord33       | 1  | N/A |
| 10563253 | Lin7b         | 19 | N/A |
| 10563295 | Ftl1          | 19 | N/A |
| 10563314 | Dhdh          | 7  | N/A |
| 10563362 | Sphk2         | 1  | N/A |
| 10563641 |               | 19 | N/A |
| 10563768 | Gm10628       | 1  | N/A |
| 10563816 | Fancf         | 1  | N/A |
| 10563838 | Nipa2         | 19 | N/A |
| 10563939 |               | 13 | N/A |
| 10563943 |               | 13 | N/A |
| 10564231 | Ube2nl        | 19 | N/A |
| 10564290 | Klf13         | 13 | N/A |
| 10564436 | Asb7          | 7  | N/A |
| 10564527 | Nr2f2         | 7  | N/A |
| 10564663 | Tdg           | 7  | N/A |
| 10564805 | Pex11a        | 13 | N/A |
| 10564809 |               | 13 | N/A |
| 10565002 | Crtc3         | 1  | N/A |
| 10565072 | Sec11a        | 19 | N/A |
| 10565081 | Timm17a       | 13 | N/A |
| 10565152 | 9330120H11Rik | 13 | N/A |
| 10565432 |               | 7  | N/A |
| 10565727 | Tsku          | 13 | N/A |
| 10565811 | Gm5775        | 7  | N/A |
| 10565819 | Slco2b1       | 1  | N/A |
| 10565852 | Rnf169        | 13 | N/A |
| 10565921 |               | 19 | N/A |
| 10565962 | P2ry2         | 7  | N/A |
| 10566067 | Rnf121        | 19 | N/A |
| 10566161 | Trim68        | 1  | N/A |
| 10566168 | Olfir33       | 13 | N/A |
| 10566190 | Olfir575      | 1  | N/A |
| 10566229 | Olfir624      | 7  | N/A |
| 10566326 | Trim12        | 7  | N/A |
| 10566333 | 9230105E10Rik | 7  | N/A |
| 10566346 | 9230105E10Rik | 1  | N/A |
| 10566358 | Trim30        | 1  | N/A |
| 10566366 | Al451617      | 7  | N/A |
| 10566438 | Fam160a2      | 7  | N/A |
| 10566488 | Trim3         | 7  | N/A |
| 10566578 | Gvin1         | 7  | N/A |
| 10566618 | Olfir6        | 19 | N/A |
| 10566622 |               | 19 | N/A |
| 10566767 | St5           | 1  | N/A |
| 10566877 | Sbf2          | 7  | N/A |
| 10567043 | Rras2         | 7  | N/A |
| 10567049 | Copb1         | 7  | N/A |
| 10567213 | LOC100047986  | 19 | N/A |
| 10567297 | Itpril2       | 1  | N/A |
| 10567316 | Tmc7          | 13 | N/A |
| 10567423 | Dcun1d3       | 13 | N/A |

|          |               |    |     |
|----------|---------------|----|-----|
| 10567496 | Dnahc3        | 13 | N/A |
| 10567591 | Usp31         | 13 | N/A |
| 10567608 | Cog7          | 13 | N/A |
| 10567739 | 4933440M02Rik | 1  | N/A |
| 10567797 | Xpo6          | 7  | N/A |
| 10567903 | Sh2b1         | 7  | N/A |
| 10568131 | 2900092E17Rik | 19 | N/A |
| 10568252 | Zfp689        | 19 | N/A |
| 10568296 | Hsd3b7        | 1  | N/A |
| 10568432 | Rnd2          | 19 | N/A |
| 10568480 | Nsmce4a       | 7  | N/A |
| 10568521 | 2310057M21Rik | 13 | N/A |
| 10568568 | Oat           | 7  | N/A |
| 10568593 | Mettl10       | 19 | N/A |
| 10568758 | 9430038I01Rik | 1  | N/A |
| 10568780 | Mapk1ip1      | 7  | N/A |
| 10568897 | Tubgcp2       | 7  | N/A |
| 10568988 | Bet1l         | 13 | N/A |
| 10569008 | Cox8b         | 19 | N/A |
| 10569102 | Irf7          | 13 | N/A |
| 10569149 | Eps8l2        | 1  | N/A |
| 10569152 | Pddc1         | 1  | N/A |
| 10569168 | Slc25a22      | 7  | N/A |
| 10569265 | Tollip        | 13 | N/A |
| 10569458 |               | 7  | N/A |
| 10569545 | Nadsyn1       | 7  | N/A |
| 10569583 | Ppfa1         | 19 | N/A |
| 10569611 | Fadd          | 7  | N/A |
| 10569717 |               | 19 | N/A |
| 10569767 | Zfp358        | 7  | N/A |
| 10569823 | C330021F23Rik | 1  | N/A |
| 10569830 | 2310057J16Rik | 7  | N/A |
| 10569886 | Trappc5       | 13 | N/A |
| 10569962 | Ccl25         | 19 | N/A |
| 10570000 | Gpi1          | 13 | N/A |
| 10570002 | 2410089E03Rik | 7  | N/A |
| 10570144 | Arhgef7       | 1  | N/A |
| 10570321 | Cul4a         | 13 | N/A |
| 10570573 | Agpat5        | 19 | N/A |
| 10570610 | Defb4         | 19 | N/A |
| 10570837 | Slc20a2       | 7  | N/A |
| 10571250 | Hmgb1-rs17    | 19 | N/A |
| 10571302 | Tmem66        | 19 | N/A |
| 10571415 | Vps37a        | 1  | N/A |
| 10571621 | Ufsp2         | 19 | N/A |
| 10571705 | Irf2          | 7  | N/A |
| 10571715 | Enpp6         | 19 | N/A |
| 10571737 | AA386476      | 19 | N/A |
| 10571849 | Fbxo8         | 1  | N/A |
| 10571984 | Ddx60         | 7  | N/A |
| 10572095 | Nat3          | 7  | N/A |
| 10572109 | Ints10        | 1  | N/A |
| 10572180 | Atp13a1       | 13 | N/A |
| 10572212 | Gmip          | 7  | N/A |
| 10572282 | Hapln4        | 1  | N/A |
| 10572419 | Eil           | 7  | N/A |
| 10572533 | Myo9b         | 7  | N/A |
| 10572786 | Ap1m1         | 1  | N/A |
| 10572870 | Hmgxb4        | 1  | N/A |
| 10572897 | Hmox1         | 1  | N/A |
| 10572949 | Nr3c2         | 7  | N/A |
| 10573112 |               | 19 | N/A |
| 10573261 | Asf1b         | 19 | N/A |
| 10573344 |               | 19 | N/A |
| 10573519 | Tnpo2         | 7  | N/A |
| 10573626 | Gpt2          | 13 | N/A |
| 10573675 | Lonp2         | 7  | N/A |
| 10573713 | Heatr3        | 19 | N/A |
| 10573821 |               | 19 | N/A |
| 10573823 | Chd9          | 19 | N/A |
| 10573865 | LOC433762     | 13 | N/A |
| 10573893 | Fto           | 7  | N/A |
| 10574023 | Mt2           | 13 | N/A |
| 10574027 | Mt1           | 13 | N/A |
| 10574087 | Herpud1       | 13 | N/A |
| 10574137 | Nlrc5         | 7  | N/A |
| 10574139 | Nlrc5         | 7  | N/A |
| 10574145 | Nlrc5         | 7  | N/A |
| 10574149 | Nlrc5         | 7  | N/A |
| 10574157 | Nlrc5         | 7  | N/A |
| 10574166 | Cpne2         | 13 | N/A |
| 10574204 | Arl2bp        | 7  | N/A |
| 10574436 | Khdrbs1       | 13 | N/A |
| 10574438 | Cdh5          | 1  | N/A |

|          |               |    |     |
|----------|---------------|----|-----|
| 10574595 |               | 19 | N/A |
| 10574617 | Ces8          | 19 | N/A |
| 10574632 | Cbfb          | 13 | N/A |
| 10574694 | Elmo3         | 13 | N/A |
| 10574789 | Fam65a        | 1  | N/A |
| 10574939 |               | 7  | N/A |
| 10574944 | Dus2l         | 19 | N/A |
| 10574962 | Nfatc3        | 1  | N/A |
| 10575052 | Cdh1          | 1  | N/A |
| 10575120 | Sntb2         | 1  | N/A |
| 10575144 | Nip7          | 19 | N/A |
| 10575151 | C630050I24Rik | 19 | N/A |
| 10575184 | Wwp2          | 7  | N/A |
| 10575249 | Txn14b        | 19 | N/A |
| 10575349 | Tat           | 19 | N/A |
| 10575473 | Gm9558        | 19 | N/A |
| 10575476 | Vac14         | 13 | N/A |
| 10575578 | 4930402E16Rik | 7  | N/A |
| 10575598 | Znrf1         | 7  | N/A |
| 10575662 | Mon1b         | 1  | N/A |
| 10575685 | Nudt7         | 7  | N/A |
| 10575706 | Wwox          | 7  | N/A |
| 10575750 | Bcmo1         | 7  | N/A |
| 10575833 | Hsd17b2       | 7  | N/A |
| 10576010 | Gse1          | 13 | N/A |
| 10576090 | Zfpm1         | 1  | N/A |
| 10576191 | Spg7          | 19 | N/A |
| 10576274 | Zfp276        | 13 | N/A |
| 10576305 | Tcf25         | 13 | N/A |
| 10576354 | Afg3l1        | 19 | N/A |
| 10576386 | Rhou          | 1  | N/A |
| 10576659 |               | 19 | N/A |
| 10576696 | Insr          | 7  | N/A |
| 10576774 | Clec4g        | 1  | N/A |
| 10576873 | Elavl1        | 1  | N/A |
| 10576901 | Slc10a2       | 19 | N/A |
| 10576971 | Irs2          | 19 | N/A |
| 10577517 | Slc25a15      | 1  | N/A |
| 10577528 | A1316807      | 7  | N/A |
| 10577641 | 1810011O10Rik | 13 | N/A |
| 10577757 | Adam9         | 19 | N/A |
| 10577808 | Tacc1         | 19 | N/A |
| 10577838 | Ddhd2         | 13 | N/A |
| 10577858 | Bag4          | 7  | N/A |
| 10577882 | Hgsnat        | 13 | N/A |
| 10578017 | Gm9911        | 19 | N/A |
| 10578027 | Mak16         | 13 | N/A |
| 10578109 | Ubxn8         | 7  | N/A |
| 10578123 | Rbpms         | 7  | N/A |
| 10578138 | Dctn6         | 13 | N/A |
| 10578149 | Leprot1       | 1  | N/A |
| 10578155 |               | 19 | N/A |
| 10578222 | Dlc1          | 1  | N/A |
| 10578320 | Gm8423        | 1  | N/A |
| 10578391 |               | 1  | N/A |
| 10578427 | F11           | 7  | N/A |
| 10578493 | Tlr3          | 1  | N/A |
| 10578545 |               | 19 | N/A |
| 10578623 | Wwc2          | 7  | N/A |
| 10578649 | Odz3          | 7  | N/A |
| 10578679 | Gm10675       | 19 | N/A |
| 10578685 |               | 19 | N/A |
| 10578703 | Spcs3         | 19 | N/A |
| 10578757 |               | 1  | N/A |
| 10578810 | Clcn3         | 19 | N/A |
| 10578922 | Kihl2         | 19 | N/A |
| 10579199 | Slc25a42      | 7  | N/A |
| 10579234 | Upf1          | 13 | N/A |
| 10579331 | Gdf15         | 19 | N/A |
| 10579479 | Nr2f6         | 1  | N/A |
| 10579486 | Ushbp1        | 19 | N/A |
| 10579649 | Cib3          | 7  | N/A |
| 10579744 | Large         | 7  | N/A |
| 10579769 |               | 19 | N/A |
| 10579852 | Mmaa          | 19 | N/A |
| 10579925 | Gab1          | 13 | N/A |
| 10579952 | LOC675736     | 13 | N/A |
| 10579954 |               | 19 | N/A |
| 10579974 | Tbc1d9        | 19 | N/A |
| 10579976 | Elmod2        | 7  | N/A |
| 10580160 | Mri1          | 13 | N/A |
| 10580210 | Rad23a        | 13 | N/A |
| 10580370 | Dnaja2        | 13 | N/A |
| 10580516 | Gm6625        | 19 | N/A |

|          |               |    |     |
|----------|---------------|----|-----|
| 10580752 | 9330175E14Rik | 7  | N/A |
| 10580885 | Csnk2a2       | 7  | N/A |
| 10580957 | Slc38a7       | 7  | N/A |
| 10581336 | Gfod2         | 19 | N/A |
| 10581395 | Slc12a4       | 13 | N/A |
| 10581523 | Terf2         | 7  | N/A |
| 10581538 | Nqo1          | 13 | N/A |
| 10581547 | Nob1          | 13 | N/A |
| 10581813 | Mkl           | 7  | N/A |
| 10582209 | Mthfsd        | 19 | N/A |
| 10582241 | Zcchc14       | 13 | N/A |
| 10582295 | Odc1          | 19 | N/A |
| 10582330 | Rnf166        | 7  | N/A |
| 10582477 | Spata2L       | 7  | N/A |
| 10582549 |               | 13 | N/A |
| 10582664 | 2310022B05Rik | 1  | N/A |
| 10582694 | Fam89a        | 19 | N/A |
| 10582708 | Exoc8         | 19 | N/A |
| 10582811 | Irf2bp2       | 1  | N/A |
| 10582814 | Tomm20        | 13 | N/A |
| 10582896 |               | 19 | N/A |
| 10582958 | Gucy1a2       | 1  | N/A |
| 10583254 | Cwc15         | 1  | N/A |
| 10583326 | Slc36a4       | 13 | N/A |
| 10583347 | Chordc1       | 19 | N/A |
| 10583388 | Olfr836       | 13 | N/A |
| 10583402 | Zfp317        | 1  | N/A |
| 10583416 | Gm7769        | 13 | N/A |
| 10583647 | Dnm2          | 7  | N/A |
| 10583732 | Ldlr          | 13 | N/A |
| 10583753 |               | 13 | N/A |
| 10583773 | BC018242      | 19 | N/A |
| 10583920 | Eepd1         | 7  | N/A |
| 10584057 | Zbtb44        | 7  | N/A |
| 10584071 | Prdm10        | 1  | N/A |
| 10584120 |               | 19 | N/A |
| 10584194 | Srpr          | 19 | N/A |
| 10584200 | Rpusd4        | 19 | N/A |
| 10584271 | Tmem218       | 19 | N/A |
| 10584334 | Siae          | 7  | N/A |
| 10584420 | Olfr907       | 19 | N/A |
| 10584435 | Vwa5a         | 7  | N/A |
| 10584576 | Hspa8         | 13 | N/A |
| 10584578 | Hspa8         | 13 | N/A |
| 10584580 |               | 13 | N/A |
| 10584589 |               | 1  | N/A |
| 10584712 | Hyou1         | 1  | N/A |
| 10584741 | Slc37a4       | 13 | N/A |
| 10584777 | Ddx6          | 13 | N/A |
| 10584819 |               | 19 | N/A |
| 10584977 | BC033915      | 7  | N/A |
| 10585129 | Zw10          | 1  | N/A |
| 10585194 | Ii18          | 7  | N/A |
| 10585474 | Psma4         | 7  | N/A |
| 10585533 | Dnajb6        | 13 | N/A |
| 10585610 | Ptpn9         | 1  | N/A |
| 10585625 | Sin3a         | 7  | N/A |
| 10585699 | Fabp5         | 1  | N/A |
| 10585721 | Scamp2        | 1  | N/A |
| 10585842 | Nptn          | 13 | N/A |
| 10585932 | Pkm2          | 19 | N/A |
| 10586064 | Anp32a        | 1  | N/A |
| 10586405 | Spg21         | 7  | N/A |
| 10586458 | Csnk1g1       | 7  | N/A |
| 10586484 | Fam96a        | 19 | N/A |
| 10586491 | Dapk2         | 1  | N/A |
| 10586700 | Rora          | 19 | N/A |
| 10586759 | Bnip2         | 19 | N/A |
| 10587211 | Leo1          | 19 | N/A |
| 10587284 | Elovl5        | 1  | N/A |
| 10587299 | Ick           | 1  | N/A |
| 10587503 | Sh3bgrl2      | 7  | N/A |
| 10587532 | Gm5919        | 19 | N/A |
| 10587655 | 4930422I07Rik | 19 | N/A |
| 10587746 | Tmem41b       | 19 | N/A |
| 10587871 | Paqr9         | 1  | N/A |
| 10588263 | Slco2a1       | 1  | N/A |
| 10588294 | Topbp1        | 19 | N/A |
| 10588357 | Acad11        | 7  | N/A |
| 10588419 | Aste1         | 13 | N/A |
| 10588683 |               | 7  | N/A |
| 10588826 | Ip6k1         | 7  | N/A |
| 10588876 | Nicn1         | 19 | N/A |
| 10588883 | Amt           | 1  | N/A |

|          |               |    |     |
|----------|---------------|----|-----|
| 10588927 | 1700102P08Rik | 19 | N/A |
| 10588975 | Usp19         | 7  | N/A |
| 10589030 | Qrich1        | 7  | N/A |
| 10589099 | Ip6k2         | 1  | N/A |
| 10589420 | Cdc25a        | 19 | N/A |
| 10589511 | Scap          | 1  | N/A |
| 10589982 | Azi2          | 7  | N/A |
| 10590149 | Xylb          | 13 | N/A |
| 10590191 | Wdr48         | 1  | N/A |
| 10590245 | Slc25a38      | 19 | N/A |
| 10590343 | Trak1         | 13 | N/A |
| 10590452 | Abhd5         | 19 | N/A |
| 10590646 |               | 19 | N/A |
| 10590808 | Yap1          | 7  | N/A |
| 10591009 | Med17         | 7  | N/A |
| 10591110 | Fat3          | 19 | N/A |
| 10591114 | Fat3          | 19 | N/A |
| 10591127 | Fat3          | 19 | N/A |
| 10591161 | Zfp558        | 19 | N/A |
| 10591350 | Angpt16       | 1  | N/A |
| 10591416 |               | 19 | N/A |
| 10591494 | S1pr5         | 19 | N/A |
| 10591563 | Kank2         | 7  | N/A |
| 10591643 | Rab3d         | 13 | N/A |
| 10591658 | LOC100049077  | 19 | N/A |
| 10591715 | Zfp653        | 7  | N/A |
| 10591773 |               | 13 | N/A |
| 10592023 | Aplp2         | 19 | N/A |
| 10592067 | Fli1          | 1  | N/A |
| 10592084 | St3gal4       | 13 | N/A |
| 10592114 | Foxred1       | 19 | N/A |
| 10592160 | Gm6762        | 1  | N/A |
| 10592342 | Tbrg1         | 7  | N/A |
| 10592376 | Olfr917       | 1  | N/A |
| 10592618 | Tbcel         | 7  | N/A |
| 10592655 | Arhgef12      | 7  | N/A |
| 10592719 | Oaf           | 7  | N/A |
| 10592802 | C2cd2l        | 13 | N/A |
| 10592919 | Arcn1         | 19 | N/A |
| 10593103 | Rnf214        | 1  | N/A |
| 10593159 | Pafah1b2      | 19 | N/A |
| 10593213 | Rbm7          | 7  | N/A |
| 10593225 | Zbtb16        | 13 | N/A |
| 10593332 | Bco2          | 19 | N/A |
| 10593413 | 2310030G06Rik | 1  | N/A |
| 10593421 | 1110032A03Rik | 7  | N/A |
| 10593483 | Fdx1          | 13 | N/A |
| 10593646 | Tnfaip8l3     | 19 | N/A |
| 10593776 | Nrg4          | 13 | N/A |
| 10593878 | Snx33         | 1  | N/A |
| 10593927 | Scamp5        | 13 | N/A |
| 10594053 | Pml           | 1  | N/A |
| 10594404 | Smad3         | 7  | N/A |
| 10594501 | Ptplad1       | 13 | N/A |
| 10594636 | Ppp1r2        | 13 | N/A |
| 10594645 | Rab8b         | 19 | N/A |
| 10594785 | Rnf111        | 1  | N/A |
| 10594855 | Cgnl1         | 13 | N/A |
| 10594988 | Mapk6         | 7  | N/A |
| 10595404 | Fam46a        | 13 | N/A |
| 10595680 | Tbc1d2b       | 7  | N/A |
| 10596051 | Tmem22        | 7  | N/A |
| 10596113 |               | 19 | N/A |
| 10596148 | Trf           | 19 | N/A |
| 10596207 | Uba5          | 19 | N/A |
| 10596433 | Glyctk        | 19 | N/A |
| 10596442 | Ppm1m         | 19 | N/A |
| 10596454 | Alas1         | 13 | N/A |
| 10596481 | Abhd14a       | 19 | N/A |
| 10596543 | Rad54l2       | 13 | N/A |
| 10596545 | Rad54l2       | 13 | N/A |
| 10596718 | Slc38a3       | 7  | N/A |
| 10596737 | Gnat1         | 7  | N/A |
| 10596815 | Gmppb         | 7  | N/A |
| 10596931 | Wdr6          | 7  | N/A |
| 10596951 | Arih2         | 7  | N/A |
| 10597258 | Tmie          | 1  | N/A |
| 10597352 |               | 19 | N/A |
| 10597413 | Crtap         | 1  | N/A |
| 10597470 | Cmtm8         | 7  | N/A |
| 10597493 | Stt3b         | 19 | N/A |
| 10597518 | Tgfbr2        | 13 | N/A |
| 10597573 | Eif1          | 13 | N/A |
| 10597833 | Sec22c        | 7  | N/A |

|          |               |    |     |
|----------|---------------|----|-----|
| 10597871 | Higd1a        | 19 | N/A |
| 10597875 | Cyp8b1        | 7  | N/A |
| 10597973 | Lztf1         | 7  | N/A |
| 10597978 | Fyco1         | 7  | N/A |
| 10598018 |               | 19 | N/A |
| 10598020 |               | 19 | N/A |
| 10598025 |               | 19 | N/A |
| 10598027 |               | 19 | N/A |
| 10598029 | ND1           | 19 | N/A |
| 10598034 | ND2           | 19 | N/A |
| 10598036 | COX1          | 19 | N/A |
| 10598038 |               | 19 | N/A |
| 10598043 | Gm10925       | 19 | N/A |
| 10598049 | COX3          | 19 | N/A |
| 10598053 |               | 19 | N/A |
| 10598055 | ND3           | 19 | N/A |
| 10598057 |               | 19 | N/A |
| 10598059 | ND4L          | 19 | N/A |
| 10598067 |               | 19 | N/A |
| 10598069 |               | 19 | N/A |
| 10598101 | Maml2         | 19 | N/A |
| 10598111 | Dhrsx         | 1  | N/A |
| 10598198 | Mia3          | 19 | N/A |
| 10598409 | Tcfe3         | 1  | N/A |
| 10598638 | Mid1ip1       | 13 | N/A |
| 10599560 |               | 13 | N/A |
| 10599576 | Ppdpf         | 1  | N/A |
| 10599612 | Phf6          | 19 | N/A |
| 10599835 |               | 7  | N/A |
| 10599853 | Ldoc1         | 19 | N/A |
| 10599925 | Styx          | 7  | N/A |
| 10599997 | Mtmr1         | 7  | N/A |
| 10600082 | Nsdhl         | 7  | N/A |
| 10600148 | DXBay18       | 19 | N/A |
| 10600169 | Bgn           | 1  | N/A |
| 10600324 |               | 19 | N/A |
| 10600810 | Gm9009        | 13 | N/A |
| 10600819 | Zxdb          | 1  | N/A |
| 10600836 | Msn           | 1  | N/A |
| 10600901 | Ar            | 13 | N/A |
| 10600936 | Efnb1         | 1  | N/A |
| 10601150 |               | 1  | N/A |
| 10601161 | Gjb1          | 7  | N/A |
| 10601390 | Pgk1          | 19 | N/A |
| 10601539 |               | 19 | N/A |
| 10601551 | Gm16373       | 19 | N/A |
| 10601771 | Armxc1        | 19 | N/A |
| 10601844 | Bhlhb9        | 13 | N/A |
| 10601878 | Tceal1        | 7  | N/A |
| 10602090 | Atg4a         | 19 | N/A |
| 10602385 | Pfkfb1        | 19 | N/A |
| 10602599 | Smc1a         | 1  | N/A |
| 10602731 | Gm8578        | 19 | N/A |
| 10602754 |               | 1  | N/A |
| 10603026 | Ctps2         | 7  | N/A |
| 10603087 | Pir           | 7  | N/A |
| 10603208 | Mid1          | 1  | N/A |
| 10603354 | Magix         | 1  | N/A |
| 10603387 | Hdac6         | 7  | N/A |
| 10603567 | Dynlt3        | 19 | N/A |
| 10603702 | Llph          | 13 | N/A |
| 10603746 | Maob          | 19 | N/A |
| 10604393 | Gm9907        | 19 | N/A |
| 10604451 | Enox2         | 7  | N/A |
| 10604614 |               | 19 | N/A |
| 10604653 | Zfp36l3       | 19 | N/A |
| 10604671 |               | 19 | N/A |
| 10604687 | Mmgt1         | 19 | N/A |
| 10604844 |               | 19 | N/A |
| 10604846 | Gm6754        | 13 | N/A |
| 10604922 | BC023829      | 19 | N/A |
| 10605195 | Hcfc1         | 7  | N/A |
| 10605338 | G6pdx         | 1  | N/A |
| 10605493 | Prrg1         | 19 | N/A |
| 10605552 |               | 19 | N/A |
| 10605651 |               | 19 | N/A |
| 10605766 | Maged1        | 19 | N/A |
| 10605820 | Zc4h2         | 1  | N/A |
| 10605828 | 1700010D01Rik | 19 | N/A |
| 10605848 | Vsig4         | 1  | N/A |
| 10605919 | Pja1          | 1  | N/A |
| 10605938 | P2ry4         | 1  | N/A |
| 10606001 | Snx12         | 1  | N/A |
| 10606016 | Il2rg         | 1  | N/A |

|                |                         |          |          |
|----------------|-------------------------|----------|----------|
| 10606315       | Taf9b                   | 7        | N/A      |
| 10606436       | Nsbp1                   | 19       | N/A      |
| 10606592       | Tacc1                   | 1        | N/A      |
| 10606689       | Timm8a1                 | 13       | N/A      |
| 10606924       |                         | 19       | N/A      |
| 10606936       | Gm6322                  | 19       | N/A      |
| 10606989       | Tsc22d3                 | 19       | N/A      |
| 10607089       | Acsl4                   | 19       | N/A      |
| 10607250       | Apex2                   | 13       | N/A      |
| 10607419       |                         | 19       | N/A      |
| 10607467       | Sat1                    | 7        | N/A      |
| 10607619       | Cdkl5                   | 7        | N/A      |
| 10607877       | Prps2                   | 7        | N/A      |
| 10607910       | Msl3                    | 19       | N/A      |
|                |                         |          |          |
| Liver Class IV |                         |          |          |
| Probe ID       | Gene ID                 | Con Peak | TSR Peak |
| 10344614       | ---                     | N/A      | N/A      |
| 10344616       | ---                     | N/A      | N/A      |
| 10344618       | ---                     | N/A      | N/A      |
| 10344620       | Gm10568                 | N/A      | N/A      |
| 10344622       | ---                     | N/A      | N/A      |
| 10344624       | Lyp1a1                  | N/A      | N/A      |
| 10344633       | Tcea1                   | N/A      | N/A      |
| 10344637       | Atp6v1h                 | N/A      | N/A      |
| 10344653       | Oprk1                   | N/A      | N/A      |
| 10344658       | Rb1cc1                  | N/A      | N/A      |
| 10344674       | Fam150a                 | N/A      | N/A      |
| 10344705       | ---                     | N/A      | N/A      |
| 10344707       | Pcmdt1                  | N/A      | N/A      |
| 10344713       | Ahcy                    | N/A      | N/A      |
| 10344715       | ---                     | N/A      | N/A      |
| 10344717       | ---                     | N/A      | N/A      |
| 10344719       | ---                     | N/A      | N/A      |
| 10344723       | Rrs1                    | N/A      | N/A      |
| 10344725       | Adhfe1                  | N/A      | N/A      |
| 10344741       | Hnrnpa3                 | N/A      | N/A      |
| 10344743       | 3110035E14Rik           | N/A      | N/A      |
| 10344789       | Cspp1                   | N/A      | N/A      |
| 10344797       | Cspp1                   | N/A      | N/A      |
| 10344799       | Cspp1                   | N/A      | N/A      |
| 10344801       | Cspp1                   | N/A      | N/A      |
| 10344803       | Cspp1                   | N/A      | N/A      |
| 10344805       | Cspp1                   | N/A      | N/A      |
| 10344807       | Cspp1                   | N/A      | N/A      |
| 10344809       | Cspp1                   | N/A      | N/A      |
| 10344811       | Cspp1                   | N/A      | N/A      |
| 10344813       | Cspp1                   | N/A      | N/A      |
| 10344815       | Cspp1                   | N/A      | N/A      |
| 10344817       | Cspp1                   | N/A      | N/A      |
| 10344819       | Cspp1                   | N/A      | N/A      |
| 10344821       | Cspp1                   | N/A      | N/A      |
| 10344835       | ---                     | N/A      | N/A      |
| 10344837       | Prex2                   | N/A      | N/A      |
| 10344879       | A830018L16Rik           | N/A      | N/A      |
| 10344895       | ---                     | N/A      | N/A      |
| 10344897       | Sulf1                   | N/A      | N/A      |
| 10344922       | ---                     | N/A      | N/A      |
| 10344931       | Rpl5                    | N/A      | N/A      |
| 10344933       | ---                     | N/A      | N/A      |
| 10344935       | Kcnb2                   | N/A      | N/A      |
| 10344939       | Terf1                   | N/A      | N/A      |
| 10344950       | Gm7634                  | N/A      | N/A      |
| 10344952       | Rdh10                   | N/A      | N/A      |
| 10344966       | Ly96                    | N/A      | N/A      |
| 10344973       | Gdap1                   | N/A      | N/A      |
| 10344990       | Crispld1                | N/A      | N/A      |
| 10345025       | lars                    | N/A      | N/A      |
| 10345030       | Mir133b                 | N/A      | N/A      |
| 10345046       | Efhc1                   | N/A      | N/A      |
| 10345065       | Gsta3                   | N/A      | N/A      |
| 10345074       | Cetn4                   | N/A      | N/A      |
| 10345077       | Khdc1a                  | N/A      | N/A      |
| 10345087       | Mir30a                  | N/A      | N/A      |
| 10345089       | Mir30c-2                | N/A      | N/A      |
| 10345091       | B3gat2                  | N/A      | N/A      |
| 10345099       | 1110058L19Rik           | N/A      | N/A      |
| 10345141       | Lmbrd1                  | N/A      | N/A      |
| 10345167       | ---                     | N/A      | N/A      |
| 10345172       | Gm9884                  | N/A      | N/A      |
| 10345174       | ---                     | N/A      | N/A      |
| 10345181       | Gm6462                  | N/A      | N/A      |
| 10345183       | Cdk10                   | N/A      | N/A      |
| 10345200       | LOC100505265 /// Gm6489 | N/A      | N/A      |

|          |                                |     |     |
|----------|--------------------------------|-----|-----|
| 10345203 | Paox                           | N/A | N/A |
| 10345206 | ---                            | N/A | N/A |
| 10345212 | Khdrbs2                        | N/A | N/A |
| 10345224 | ---                            | N/A | N/A |
| 10345226 | ---                            | N/A | N/A |
| 10345228 | 1700001G17Rik                  | N/A | N/A |
| 10345230 | Rab23                          | N/A | N/A |
| 10345241 | Dst                            | N/A | N/A |
| 10345350 | ---                            | N/A | N/A |
| 10345357 | Imp4                           | N/A | N/A |
| 10345368 | D1Ert448e                      | N/A | N/A |
| 10345387 | Prss39                         | N/A | N/A |
| 10345404 | ---                            | N/A | N/A |
| 10345406 | Arhgef4                        | N/A | N/A |
| 10345409 | Arhgef4                        | N/A | N/A |
| 10345411 | Arhgef4                        | N/A | N/A |
| 10345423 | Plekhb2                        | N/A | N/A |
| 10345436 | LOC280487                      | N/A | N/A |
| 10345440 | ---                            | N/A | N/A |
| 10345442 | Hs6st1                         | N/A | N/A |
| 10345482 | Cnm4                           | N/A | N/A |
| 10345492 | Cnm3                           | N/A | N/A |
| 10345504 | Cox5b                          | N/A | N/A |
| 10345527 | ---                            | N/A | N/A |
| 10345546 | Vwa3b                          | N/A | N/A |
| 10345548 | Vwa3b                          | N/A | N/A |
| 10345550 | Vwa3b                          | N/A | N/A |
| 10345552 | Vwa3b                          | N/A | N/A |
| 10345554 | Vwa3b                          | N/A | N/A |
| 10345556 | Vwa3b                          | N/A | N/A |
| 10345580 | Inpp4a                         | N/A | N/A |
| 10345608 | Unc50                          | N/A | N/A |
| 10345616 | Lipt1 /// Mitd1                | N/A | N/A |
| 10345620 | Mrpl30                         | N/A | N/A |
| 10345626 | Eif5b                          | N/A | N/A |
| 10345656 | Nms                            | N/A | N/A |
| 10345666 | Pdcl3                          | N/A | N/A |
| 10345698 | Tbc1d8 /// Rpl31 /// Gm16382   | N/A | N/A |
| 10345704 | ---                            | N/A | N/A |
| 10345706 | D1Bwg0212e                     | N/A | N/A |
| 10345762 | Il1r1                          | N/A | N/A |
| 10345777 | Il1r12                         | N/A | N/A |
| 10345824 | Il18rap                        | N/A | N/A |
| 10345840 | Slc9a4                         | N/A | N/A |
| 10345875 | ---                            | N/A | N/A |
| 10345877 | Gm9915                         | N/A | N/A |
| 10345879 | Pou3f3                         | N/A | N/A |
| 10345882 | Mrps9                          | N/A | N/A |
| 10345895 | Gpr45                          | N/A | N/A |
| 10345902 | 8430432A02Rik                  | N/A | N/A |
| 10345904 | AI597479                       | N/A | N/A |
| 10345909 | Rpl29 /// Gm8580 /// Rpl29-ps2 | N/A | N/A |
| 10345911 | ---                            | N/A | N/A |
| 10345926 | ---                            | N/A | N/A |
| 10345928 | ---                            | N/A | N/A |
| 10345930 | Tpp2                           | N/A | N/A |
| 10345967 | Bivm                           | N/A | N/A |
| 10346000 | Gulp1                          | N/A | N/A |
| 10346067 | ---                            | N/A | N/A |
| 10346069 | ---                            | N/A | N/A |
| 10346072 | ---                            | N/A | N/A |
| 10346074 | Wdr75                          | N/A | N/A |
| 10346107 | Dnahc7b                        | N/A | N/A |
| 10346109 | Dnahc7b                        | N/A | N/A |
| 10346114 | ---                            | N/A | N/A |
| 10346137 | ---                            | N/A | N/A |
| 10346139 | ---                            | N/A | N/A |
| 10346150 | Tmeff2                         | N/A | N/A |
| 10346164 | Sdpr                           | N/A | N/A |
| 10346191 | Stat1                          | N/A | N/A |
| 10346222 | LOC280487                      | N/A | N/A |
| 10346224 | Tmem194b                       | N/A | N/A |
| 10346235 | Hibch                          | N/A | N/A |
| 10346255 | Ormdl1                         | N/A | N/A |
| 10346303 | Hspe1 /// Hspe1-rs1            | N/A | N/A |
| 10346310 | Mobk13                         | N/A | N/A |
| 10346321 | Gm10561                        | N/A | N/A |
| 10346328 | ---                            | N/A | N/A |
| 10346330 | Plcl1                          | N/A | N/A |
| 10346337 | 1700066M21Rik                  | N/A | N/A |
| 10346340 | 9430016H08Rik                  | N/A | N/A |
| 10346348 | Spats2l                        | N/A | N/A |
| 10346365 | Sgol2                          | N/A | N/A |
| 10346374 | Aox1                           | N/A | N/A |



|          |                  |     |     |
|----------|------------------|-----|-----|
| 10346410 | Aox3             | N/A | N/A |
| 10346523 | Bzw1             | N/A | N/A |
| 10346533 | Nif3l1 /// Ppil3 | N/A | N/A |
| 10346544 | Ndufb3           | N/A | N/A |
| 10346549 | Cbx3 /// Gm6901  | N/A | N/A |
| 10346551 | Cflar            | N/A | N/A |
| 10346562 | Cflar            | N/A | N/A |
| 10346564 | Casp8            | N/A | N/A |
| 10346592 | Als2cr4          | N/A | N/A |
| 10346607 | Fzd7             | N/A | N/A |
| 10346634 | Nop58            | N/A | N/A |
| 10346651 | Bmpr2            | N/A | N/A |
| 10346668 | Fam117b          | N/A | N/A |
| 10346678 | Carf             | N/A | N/A |
| 10346695 | Nbeal1           | N/A | N/A |
| 10346722 | Nbeal1           | N/A | N/A |
| 10346747 | Cyp20a1          | N/A | N/A |
| 10346762 | ---              | N/A | N/A |
| 10346764 | Abi2             | N/A | N/A |
| 10346780 | Eif4a1           | N/A | N/A |
| 10346808 | Rpl17            | N/A | N/A |
| 10346810 | Pard3b           | N/A | N/A |
| 10346838 | Pard3b           | N/A | N/A |
| 10346840 | ---              | N/A | N/A |
| 10346843 | Nrp2             | N/A | N/A |
| 10346867 | Eef1b2           | N/A | N/A |
| 10346874 | ---              | N/A | N/A |
| 10346876 | Snora41          | N/A | N/A |
| 10346878 | Zdbf2            | N/A | N/A |
| 10346882 | Adam23           | N/A | N/A |
| 10346914 | Fastkd2          | N/A | N/A |
| 10346938 | Gm13749          | N/A | N/A |
| 10346941 | ---              | N/A | N/A |
| 10346943 | Creb1            | N/A | N/A |
| 10346960 | Ccnyl1           | N/A | N/A |
| 10346970 | Pikfyve          | N/A | N/A |
| 10347033 | Crygf            | N/A | N/A |
| 10347036 | Mtap2            | N/A | N/A |
| 10347058 | ---              | N/A | N/A |
| 10347060 | Unc80            | N/A | N/A |
| 10347073 | Unc80            | N/A | N/A |
| 10347106 | Rpe              | N/A | N/A |
| 10347117 | Cps1             | N/A | N/A |
| 10347186 | ---              | N/A | N/A |
| 10347188 | Vwc2l            | N/A | N/A |
| 10347193 | Atic             | N/A | N/A |
| 10347216 | Rpl21 /// Gm5528 | N/A | N/A |
| 10347218 | ---              | N/A | N/A |
| 10347232 | Xrcc5            | N/A | N/A |
| 10347254 | Smarcal1         | N/A | N/A |
| 10347277 | Igfbp2           | N/A | N/A |
| 10347324 | Gm216            | N/A | N/A |
| 10347362 | Mir26b           | N/A | N/A |
| 10347386 | Rqcd1            | N/A | N/A |
| 10347398 | Plcd4 /// Zfp142 | N/A | N/A |
| 10347417 | Bcs1l            | N/A | N/A |
| 10347460 | Ttll4            | N/A | N/A |
| 10347481 | Cyp27a1          | N/A | N/A |
| 10347497 | Wnt10a           | N/A | N/A |
| 10347503 | Cdk5r2           | N/A | N/A |
| 10347508 | Fam134a          | N/A | N/A |
| 10347521 | Zfand2b          | N/A | N/A |
| 10347552 | Stk16 /// Tuba4a | N/A | N/A |
| 10347593 | Speg             | N/A | N/A |
| 10347639 | Gmppa            | N/A | N/A |
| 10347650 | Accn4            | N/A | N/A |
| 10347662 | Tmem198          | N/A | N/A |
| 10347669 | Inha             | N/A | N/A |
| 10347672 | Stk11ip          | N/A | N/A |
| 10347724 | Slc4a3           | N/A | N/A |
| 10347726 | LOC100504876     | N/A | N/A |
| 10347728 | ---              | N/A | N/A |
| 10347730 | ---              | N/A | N/A |
| 10347732 | ---              | N/A | N/A |
| 10347734 | Sgpp2            | N/A | N/A |
| 10347748 | Utp14b /// Acsi3 | N/A | N/A |
| 10347767 | Kcne4            | N/A | N/A |
| 10347772 | Gm10555          | N/A | N/A |
| 10347774 | Mrpl44           | N/A | N/A |
| 10347779 | 9830004L10Rik    | N/A | N/A |
| 10347781 | 9430031J16Rik    | N/A | N/A |
| 10347790 | ---              | N/A | N/A |
| 10347792 | ---              | N/A | N/A |
| 10347796 | Rhbdd1           | N/A | N/A |

|          |                                                                                         |     |     |
|----------|-----------------------------------------------------------------------------------------|-----|-----|
| 10347860 | ---                                                                                     | N/A | N/A |
| 10347862 | Mff                                                                                     | N/A | N/A |
| 10347873 | Agfg1                                                                                   | N/A | N/A |
| 10347910 | Fbxo36                                                                                  | N/A | N/A |
| 10347915 | Gm7609 /// Csprs /// Gm7592                                                             | N/A | N/A |
| 10347919 | A530040E14Rik                                                                           | N/A | N/A |
| 10347925 | Gm7609 /// Csprs /// Gm7592                                                             | N/A | N/A |
| 10347928 | Sp110                                                                                   | N/A | N/A |
| 10347931 | G530012D18Rik                                                                           | N/A | N/A |
| 10347933 | Sp140 /// C130026I21Rik /// A530032D15Rik /// Arhgef12                                  | N/A | N/A |
| 10347968 | Sp100                                                                                   | N/A | N/A |
| 10347970 | Cab39                                                                                   | N/A | N/A |
| 10347980 | Itm2c                                                                                   | N/A | N/A |
| 10347988 | 4933407L21Rik                                                                           | N/A | N/A |
| 10347992 | Spata3                                                                                  | N/A | N/A |
| 10348000 | 2810459M11Rik                                                                           | N/A | N/A |
| 10348030 | ---                                                                                     | N/A | N/A |
| 10348032 | Armc9                                                                                   | N/A | N/A |
| 10348062 | B3gnt7                                                                                  | N/A | N/A |
| 10348070 | Ncl /// C130036L24Rik                                                                   | N/A | N/A |
| 10348072 | ---                                                                                     | N/A | N/A |
| 10348076 | Rpl30-ps6                                                                               | N/A | N/A |
| 10348087 | Cops7b                                                                                  | N/A | N/A |
| 10348096 | Dis3l2                                                                                  | N/A | N/A |
| 10348150 | Chrnd                                                                                   | N/A | N/A |
| 10348194 | Efh1                                                                                    | N/A | N/A |
| 10348201 | Gigyf2                                                                                  | N/A | N/A |
| 10348234 | Neu2                                                                                    | N/A | N/A |
| 10348240 | 3110079O15Rik                                                                           | N/A | N/A |
| 10348244 | Inpp5d                                                                                  | N/A | N/A |
| 10348277 | Atg16l1                                                                                 | N/A | N/A |
| 10348299 | 5830472F04Rik                                                                           | N/A | N/A |
| 10348301 | Sag                                                                                     | N/A | N/A |
| 10348321 | Dgkd                                                                                    | N/A | N/A |
| 10348354 | Ugt1a6a /// Ugt1a1 /// Ugt1a6b /// Ugt1a2 /// Ugt1a5 /// Ugt1a7c /// Ugt1a9 /// Ugt1a10 | N/A | N/A |
| 10348376 | Heatr7b1                                                                                | N/A | N/A |
| 10348410 | Spp2                                                                                    | N/A | N/A |
| 10348420 | ---                                                                                     | N/A | N/A |
| 10348424 | Sh3bp4                                                                                  | N/A | N/A |
| 10348432 | Agap1                                                                                   | N/A | N/A |
| 10348468 | Gm9991                                                                                  | N/A | N/A |
| 10348489 | Prih                                                                                    | N/A | N/A |
| 10348493 | Lrrfip1                                                                                 | N/A | N/A |
| 10348547 | Ube2f                                                                                   | N/A | N/A |
| 10348556 | ---                                                                                     | N/A | N/A |
| 10348558 | Scly                                                                                    | N/A | N/A |
| 10348570 | Espnl                                                                                   | N/A | N/A |
| 10348580 | Klh30                                                                                   | N/A | N/A |
| 10348600 | Traf3ip1                                                                                | N/A | N/A |
| 10348618 | Asb1                                                                                    | N/A | N/A |
| 10348632 | Twist2                                                                                  | N/A | N/A |
| 10348635 | Olf1r1413                                                                               | N/A | N/A |
| 10348637 | Olf1r1412                                                                               | N/A | N/A |
| 10348639 | Olf1r1411                                                                               | N/A | N/A |
| 10348641 | Olf1r1410                                                                               | N/A | N/A |
| 10348643 | Olf1r12                                                                                 | N/A | N/A |
| 10348653 | Gpc1                                                                                    | N/A | N/A |
| 10348664 | Mir149                                                                                  | N/A | N/A |
| 10348666 | Dusp28                                                                                  | N/A | N/A |
| 10348670 | Rnpep1                                                                                  | N/A | N/A |
| 10348682 | Capn10                                                                                  | N/A | N/A |
| 10348702 | Agxt                                                                                    | N/A | N/A |
| 10348739 | Sned1                                                                                   | N/A | N/A |
| 10348775 | Ppp1r7                                                                                  | N/A | N/A |
| 10348789 | ---                                                                                     | N/A | N/A |
| 10348791 | Ano7                                                                                    | N/A | N/A |
| 10348817 | Sep2                                                                                    | N/A | N/A |
| 10348829 | Farp2 /// Stk25                                                                         | N/A | N/A |
| 10348858 | Bok                                                                                     | N/A | N/A |
| 10348864 | Thap4 /// Gm10550                                                                       | N/A | N/A |
| 10348866 | Atg4b                                                                                   | N/A | N/A |
| 10348879 | Ing5                                                                                    | N/A | N/A |
| 10348889 | D2hgdh                                                                                  | N/A | N/A |
| 10348896 | Gal3st2 /// Gm6086                                                                      | N/A | N/A |
| 10348902 | Gal3st2 /// Gm6086                                                                      | N/A | N/A |
| 10348917 | Fam174a                                                                                 | N/A | N/A |
| 10348927 | ---                                                                                     | N/A | N/A |
| 10348929 | Hnrnpf                                                                                  | N/A | N/A |
| 10348932 | Gin1 /// Ppip5k2                                                                        | N/A | N/A |
| 10348945 | ---                                                                                     | N/A | N/A |
| 10348963 | Cntnap5b                                                                                | N/A | N/A |
| 10348996 | ---                                                                                     | N/A | N/A |
| 10349014 | Capza1                                                                                  | N/A | N/A |
| 10349016 | 2310035C23Rik                                                                           | N/A | N/A |

|          |                                |     |     |
|----------|--------------------------------|-----|-----|
| 10349049 | Zfp706                         | N/A | N/A |
| 10349065 | Zchc2                          | N/A | N/A |
| 10349081 | Phlpp1                         | N/A | N/A |
| 10349100 | ---                            | N/A | N/A |
| 10349108 | Serpinb5                       | N/A | N/A |
| 10349118 | Serpinb12                      | N/A | N/A |
| 10349174 | Serpinb8                       | N/A | N/A |
| 10349184 | Cdh7                           | N/A | N/A |
| 10349206 | ---                            | N/A | N/A |
| 10349208 | Cntnap5a                       | N/A | N/A |
| 10349237 | ---                            | N/A | N/A |
| 10349239 | Mki67ip                        | N/A | N/A |
| 10349249 | Clasp1                         | N/A | N/A |
| 10349314 | ---                            | N/A | N/A |
| 10349316 | Tmem185b                       | N/A | N/A |
| 10349333 | 3110009E18Rik                  | N/A | N/A |
| 10349340 | C1ql2                          | N/A | N/A |
| 10349348 | Ccdc93                         | N/A | N/A |
| 10349376 | ---                            | N/A | N/A |
| 10349378 | Dpp10                          | N/A | N/A |
| 10349383 | Slc35f5                        | N/A | N/A |
| 10349401 | Gpr39 /// Lypd1                | N/A | N/A |
| 10349404 | Mgat5                          | N/A | N/A |
| 10349427 | ---                            | N/A | N/A |
| 10349429 | ---                            | N/A | N/A |
| 10349442 | Ccnt2                          | N/A | N/A |
| 10349453 | Rab3gap1                       | N/A | N/A |
| 10349480 | R3hdm1                         | N/A | N/A |
| 10349510 | Mir128-1                       | N/A | N/A |
| 10349512 | Ubxn4                          | N/A | N/A |
| 10349527 | ---                            | N/A | N/A |
| 10349569 | ---                            | N/A | N/A |
| 10349580 | Pigr                           | N/A | N/A |
| 10349610 | Lgt1                           | N/A | N/A |
| 10349671 | Slc26a9                        | N/A | N/A |
| 10349694 | Pm20d1                         | N/A | N/A |
| 10349711 | Slc41a1                        | N/A | N/A |
| 10349724 | Rab71                          | N/A | N/A |
| 10349733 | Nucks1                         | N/A | N/A |
| 10349744 | Slc45a3                        | N/A | N/A |
| 10349752 | Elk4                           | N/A | N/A |
| 10349769 | Mir135b                        | N/A | N/A |
| 10349771 | Gm7241                         | N/A | N/A |
| 10349773 | Klhdc8a                        | N/A | N/A |
| 10349782 | Nuak2                          | N/A | N/A |
| 10349793 | Dstyk                          | N/A | N/A |
| 10349809 | Rbbp5                          | N/A | N/A |
| 10349821 | Tmem81                         | N/A | N/A |
| 10349826 | Gm10538                        | N/A | N/A |
| 10349828 | Lrrn2                          | N/A | N/A |
| 10349832 | ---                            | N/A | N/A |
| 10349834 | Pik3c2b                        | N/A | N/A |
| 10349868 | Ppp1r15b                       | N/A | N/A |
| 10349872 | ---                            | N/A | N/A |
| 10349876 | Plekha6                        | N/A | N/A |
| 10349904 | Golt1a                         | N/A | N/A |
| 10349913 | Kiss1                          | N/A | N/A |
| 10349922 | Ren2                           | N/A | N/A |
| 10349932 | Etnk2                          | N/A | N/A |
| 10349945 | Gm10537                        | N/A | N/A |
| 10349947 | Fmod                           | N/A | N/A |
| 10349953 | Chit1                          | N/A | N/A |
| 10349968 | Chi3l1                         | N/A | N/A |
| 10349980 | Adora1                         | N/A | N/A |
| 10350003 | Cyb5r1                         | N/A | N/A |
| 10350015 | Adipor1                        | N/A | N/A |
| 10350024 | Klh12                          | N/A | N/A |
| 10350039 | Rabif                          | N/A | N/A |
| 10350044 | Rpl29 /// Gm3550 /// Rpl29-ps2 | N/A | N/A |
| 10350046 | Kdm5b                          | N/A | N/A |
| 10350077 | Syt2                           | N/A | N/A |
| 10350090 | Ube2t                          | N/A | N/A |
| 10350099 | Ptprv /// Gm10535              | N/A | N/A |
| 10350113 | Arl8a                          | N/A | N/A |
| 10350128 | Nav1 /// Gm4793                | N/A | N/A |
| 10350136 | Csrp1                          | N/A | N/A |
| 10350146 | Phlda3                         | N/A | N/A |
| 10350173 | Tnnt2                          | N/A | N/A |
| 10350188 | Tmem9                          | N/A | N/A |
| 10350197 | Asc15-ps                       | N/A | N/A |
| 10350247 | Kif21b                         | N/A | N/A |
| 10350286 | Ddx59                          | N/A | N/A |
| 10350329 | Kif14                          | N/A | N/A |
| 10350331 | Zfp281                         | N/A | N/A |

|          |                                 |     |     |
|----------|---------------------------------|-----|-----|
| 10350335 | Hmbs                            | N/A | N/A |
| 10350337 | A130050007Rik                   | N/A | N/A |
| 10350341 | Mir181b-1                       | N/A | N/A |
| 10350349 | Dennd1b                         | N/A | N/A |
| 10350377 | Zbtb41                          | N/A | N/A |
| 10350425 | F13b                            | N/A | N/A |
| 10350438 | Kcnt2                           | N/A | N/A |
| 10350471 | ---                             | N/A | N/A |
| 10350473 | B3galt2                         | N/A | N/A |
| 10350489 | Uchl5                           | N/A | N/A |
| 10350502 | ---                             | N/A | N/A |
| 10350504 | ---                             | N/A | N/A |
| 10350506 | Fam5c                           | N/A | N/A |
| 10350535 | Tpr                             | N/A | N/A |
| 10350590 | Fam33a                          | N/A | N/A |
| 10350592 | 3110040M04Rik                   | N/A | N/A |
| 10350594 | lvns1abp                        | N/A | N/A |
| 10350614 | 1190005F20Rik                   | N/A | N/A |
| 10350646 | Edem3                           | N/A | N/A |
| 10350668 | Git25d2                         | N/A | N/A |
| 10350684 | Arc5                            | N/A | N/A |
| 10350697 | Nmnat2                          | N/A | N/A |
| 10350710 | 1700012A16Rik                   | N/A | N/A |
| 10350723 | ---                             | N/A | N/A |
| 10350725 | Rgs8                            | N/A | N/A |
| 10350733 | Rgs16                           | N/A | N/A |
| 10350742 | Rnasel                          | N/A | N/A |
| 10350749 | Gm5531                          | N/A | N/A |
| 10350751 | Teddm1                          | N/A | N/A |
| 10350753 | Glul                            | N/A | N/A |
| 10350758 | A930039A15Rik                   | N/A | N/A |
| 10350766 | Stx6                            | N/A | N/A |
| 10350777 | Acbd6                           | N/A | N/A |
| 10350790 | Tor1aip1 /// Tor1aip2           | N/A | N/A |
| 10350792 | Tor1aip2                        | N/A | N/A |
| 10350800 | Tor1aip2                        | N/A | N/A |
| 10350806 | Nphs2                           | N/A | N/A |
| 10350816 | Rpl35 /// Gm10269               | N/A | N/A |
| 10350819 | Csnk2a1                         | N/A | N/A |
| 10350823 | Abi2                            | N/A | N/A |
| 10350838 | 2810417H13Rik                   | N/A | N/A |
| 10350846 | Gm10531                         | N/A | N/A |
| 10350864 | Sec16b                          | N/A | N/A |
| 10350894 | ---                             | N/A | N/A |
| 10350896 | Astn1                           | N/A | N/A |
| 10350921 | Mir488                          | N/A | N/A |
| 10350923 | Rfwd2                           | N/A | N/A |
| 10350948 | ---                             | N/A | N/A |
| 10350951 | Tnr                             | N/A | N/A |
| 10350975 | Gm10530                         | N/A | N/A |
| 10350977 | 4930523C07Rik /// 4930562F07Rik | N/A | N/A |
| 10350985 | Mrps14                          | N/A | N/A |
| 10350990 | Rpl23a /// Gm6177               | N/A | N/A |
| 10350992 | Rc3h1                           | N/A | N/A |
| 10351013 | Rc3h1                           | N/A | N/A |
| 10351015 | Serpinc1                        | N/A | N/A |
| 10351026 | Gas5                            | N/A | N/A |
| 10351035 | Gas5                            | N/A | N/A |
| 10351037 | Gas5                            | N/A | N/A |
| 10351039 | Gas5                            | N/A | N/A |
| 10351041 | ---                             | N/A | N/A |
| 10351043 | Snord47                         | N/A | N/A |
| 10351045 | ---                             | N/A | N/A |
| 10351056 | Ankrd45                         | N/A | N/A |
| 10351063 | ---                             | N/A | N/A |
| 10351111 | Mir214 /// Mir199a-2 /// Dnm3os | N/A | N/A |
| 10351117 | Dnm3 /// Gm10176                | N/A | N/A |
| 10351119 | Vamp4                           | N/A | N/A |
| 10351136 | ---                             | N/A | N/A |
| 10351138 | ---                             | N/A | N/A |
| 10351140 | Kifap3                          | N/A | N/A |
| 10351163 | Scyl3                           | N/A | N/A |
| 10351179 | 2810422020Rik                   | N/A | N/A |
| 10351224 | F5                              | N/A | N/A |
| 10351259 | Slc19a2                         | N/A | N/A |
| 10351269 | 4930455F23Rik                   | N/A | N/A |
| 10351277 | Nme7                            | N/A | N/A |
| 10351293 | Dpt                             | N/A | N/A |
| 10351298 | Gpr161                          | N/A | N/A |
| 10351304 | Brp44                           | N/A | N/A |
| 10351345 | ---                             | N/A | N/A |
| 10351347 | Creg1                           | N/A | N/A |
| 10351380 | Ildr2                           | N/A | N/A |
| 10351390 | Tada1                           | N/A | N/A |

|          |                              |     |     |
|----------|------------------------------|-----|-----|
| 10351400 | Fam78b                       | N/A | N/A |
| 10351404 | Tmco1                        | N/A | N/A |
| 10351414 | Alhd9a1                      | N/A | N/A |
| 10351430 | Rxrg                         | N/A | N/A |
| 10351455 | Rgs5                         | N/A | N/A |
| 10351463 | Rgs5                         | N/A | N/A |
| 10351471 | Uhmk1                        | N/A | N/A |
| 10351482 | 1700015E13Rik                | N/A | N/A |
| 10351487 | Nos1ap /// Gm10174           | N/A | N/A |
| 10351489 | ---                          | N/A | N/A |
| 10351500 | ---                          | N/A | N/A |
| 10351502 | Dusp12                       | N/A | N/A |
| 10351504 | ---                          | N/A | N/A |
| 10351507 | Gm10522                      | N/A | N/A |
| 10351515 | Rnu1b1 /// Rnu1b6 /// Rnu1b2 | N/A | N/A |
| 10351517 | 1700009P17Rik                | N/A | N/A |
| 10351533 | Nr1i3                        | N/A | N/A |
| 10351546 | Apoa2                        | N/A | N/A |
| 10351551 | Adamts4                      | N/A | N/A |
| 10351574 | Dedd                         | N/A | N/A |
| 10351583 | Pfdn2                        | N/A | N/A |
| 10351623 | F11r                         | N/A | N/A |
| 10351636 | Refbp2                       | N/A | N/A |
| 10351644 | LOC677008 /// Cd244          | N/A | N/A |
| 10351665 | Ccdc72                       | N/A | N/A |
| 10351689 | Gm10521                      | N/A | N/A |
| 10351703 | Copa                         | N/A | N/A |
| 10351781 | Kcnj10                       | N/A | N/A |
| 10351788 | Pigm                         | N/A | N/A |
| 10351852 | Crp                          | N/A | N/A |
| 10351857 | Olf16                        | N/A | N/A |
| 10351859 | ---                          | N/A | N/A |
| 10351861 | Olf218                       | N/A | N/A |
| 10351863 | Olf1404                      | N/A | N/A |
| 10351865 | Olf418-ps1                   | N/A | N/A |
| 10351867 | Aim2                         | N/A | N/A |
| 10351880 | E430029J22Rik                | N/A | N/A |
| 10351884 | Olf433                       | N/A | N/A |
| 10351886 | Olf432                       | N/A | N/A |
| 10351891 | Olf429                       | N/A | N/A |
| 10351893 | Olf427                       | N/A | N/A |
| 10351895 | Olf424                       | N/A | N/A |
| 10351897 | LOC100505119                 | N/A | N/A |
| 10351903 | Olf420                       | N/A | N/A |
| 10351959 | 1810030J14Rik                | N/A | N/A |
| 10351961 | Olf417                       | N/A | N/A |
| 10351968 | Olf220                       | N/A | N/A |
| 10351971 | Fmn2                         | N/A | N/A |
| 10351998 | ---                          | N/A | N/A |
| 10352000 | Kmo                          | N/A | N/A |
| 10352064 | ---                          | N/A | N/A |
| 10352092 | Zfp238                       | N/A | N/A |
| 10352104 | Gm16432                      | N/A | N/A |
| 10352110 | Gm16432                      | N/A | N/A |
| 10352119 | Pppde1                       | N/A | N/A |
| 10352125 | Gm9982                       | N/A | N/A |
| 10352127 | Fam36a                       | N/A | N/A |
| 10352131 | ---                          | N/A | N/A |
| 10352133 | Efcab2                       | N/A | N/A |
| 10352143 | Kif26b                       | N/A | N/A |
| 10352150 | ---                          | N/A | N/A |
| 10352152 | Kif26b                       | N/A | N/A |
| 10352166 | Cnst                         | N/A | N/A |
| 10352178 | Scppdh                       | N/A | N/A |
| 10352192 | Ahctf1 /// Gm10518           | N/A | N/A |
| 10352194 | Cdc42bpa                     | N/A | N/A |
| 10352234 | Itpkb                        | N/A | N/A |
| 10352242 | Parp1                        | N/A | N/A |
| 10352281 | Acbd3                        | N/A | N/A |
| 10352292 | ---                          | N/A | N/A |
| 10352294 | BC031781                     | N/A | N/A |
| 10352306 | Pycr2                        | N/A | N/A |
| 10352314 | Lefty1                       | N/A | N/A |
| 10352320 | Tmem63a                      | N/A | N/A |
| 10352348 | Cnih4                        | N/A | N/A |
| 10352354 | A430110L20Rik                | N/A | N/A |
| 10352356 | Haus5                        | N/A | N/A |
| 10352396 | Trp53bp2                     | N/A | N/A |
| 10352439 | Susd4                        | N/A | N/A |
| 10352457 | Rpl21 /// Rpl21-ps1          | N/A | N/A |
| 10352459 | Rab3gap2                     | N/A | N/A |
| 10352497 | Mir664 /// Snora36b          | N/A | N/A |
| 10352499 | Mir194-1                     | N/A | N/A |
| 10352503 | Bpnt1                        | N/A | N/A |

|          |                              |     |     |
|----------|------------------------------|-----|-----|
| 10352514 | Eprs                         | N/A | N/A |
| 10352554 | ---                          | N/A | N/A |
| 10352562 | Gpatch2                      | N/A | N/A |
| 10352576 | Esrrg                        | N/A | N/A |
| 10352661 | Ptpn14                       | N/A | N/A |
| 10352703 | Mfsd7b /// A230020J21Rik     | N/A | N/A |
| 10352709 | Nsl1                         | N/A | N/A |
| 10352722 | ---                          | N/A | N/A |
| 10352725 | Tmem206                      | N/A | N/A |
| 10352735 | Ints7                        | N/A | N/A |
| 10352756 | Lpgat1                       | N/A | N/A |
| 10352767 | Nek2                         | N/A | N/A |
| 10352777 | Slc30a1                      | N/A | N/A |
| 10352792 | ---                          | N/A | N/A |
| 10352794 | Gm10516                      | N/A | N/A |
| 10352798 | Kcnh1                        | N/A | N/A |
| 10352813 | ---                          | N/A | N/A |
| 10352827 | A130010J15Rik                | N/A | N/A |
| 10352829 | A130010J15Rik /// Traf3ip3   | N/A | N/A |
| 10352864 | ---                          | N/A | N/A |
| 10352905 | Cd34                         | N/A | N/A |
| 10352914 | A330023F24Rik                | N/A | N/A |
| 10352916 | A330023F24Rik /// Mir29b-2   | N/A | N/A |
| 10352918 | A330023F24Rik /// Mir29c     | N/A | N/A |
| 10352920 | Xkr4                         | N/A | N/A |
| 10352926 | ---                          | N/A | N/A |
| 10352928 | Rp1                          | N/A | N/A |
| 10352936 | Sox17                        | N/A | N/A |
| 10352945 | ---                          | N/A | N/A |
| 10352947 | Mrp15                        | N/A | N/A |
| 10352957 | Rgs20                        | N/A | N/A |
| 10352969 | Npbwr1                       | N/A | N/A |
| 10352971 | Rb1cc1 /// 4732440D04Rik     | N/A | N/A |
| 10352980 | Sntg1                        | N/A | N/A |
| 10353002 | ---                          | N/A | N/A |
| 10353004 | Cks2                         | N/A | N/A |
| 10353008 | ---                          | N/A | N/A |
| 10353028 | Vcpip1                       | N/A | N/A |
| 10353032 | Gm6195                       | N/A | N/A |
| 10353034 | Snord87                      | N/A | N/A |
| 10353036 | Gm10567                      | N/A | N/A |
| 10353048 | ---                          | N/A | N/A |
| 10353050 | Cops5                        | N/A | N/A |
| 10353061 | ---                          | N/A | N/A |
| 10353064 | Argef1                       | N/A | N/A |
| 10353115 | ---                          | N/A | N/A |
| 10353117 | Slco5a1                      | N/A | N/A |
| 10353135 | Ncoa2                        | N/A | N/A |
| 10353165 | ---                          | N/A | N/A |
| 10353167 | Tram1                        | N/A | N/A |
| 10353181 | Lactb2                       | N/A | N/A |
| 10353189 | Gm5523 /// Gm12070 /// Gapdh | N/A | N/A |
| 10353219 | Sumo2                        | N/A | N/A |
| 10353221 | Trpa1                        | N/A | N/A |
| 10353250 | Gapdh /// Gm2451             | N/A | N/A |
| 10353252 | Gm106                        | N/A | N/A |
| 10353258 | ---                          | N/A | N/A |
| 10353272 | Stau2                        | N/A | N/A |
| 10353296 | Tceb1                        | N/A | N/A |
| 10353303 | ---                          | N/A | N/A |
| 10353305 | ---                          | N/A | N/A |
| 10353307 | ---                          | N/A | N/A |
| 10353320 | Crisp4                       | N/A | N/A |
| 10353330 | Defb44-ps                    | N/A | N/A |
| 10353333 | Defb18                       | N/A | N/A |
| 10353343 | ---                          | N/A | N/A |
| 10353413 | ---                          | N/A | N/A |
| 10353438 | Tram2                        | N/A | N/A |
| 10353450 | Gm4956                       | N/A | N/A |
| 10353460 | Kcnq5                        | N/A | N/A |
| 10353475 | Eif3m                        | N/A | N/A |
| 10353477 | ---                          | N/A | N/A |
| 10353479 | Rims1                        | N/A | N/A |
| 10353519 | 4933415F23Rik                | N/A | N/A |
| 10353524 | Ogfr1                        | N/A | N/A |
| 10353533 | B3gat2 /// Smap1             | N/A | N/A |
| 10353545 | 1110058L19Rik                | N/A | N/A |
| 10353549 | Fam135a                      | N/A | N/A |
| 10353574 | Col19a1                      | N/A | N/A |
| 10353624 | ND4L                         | N/A | N/A |
| 10353626 | ATP6 /// Gm10925 /// ATP8    | N/A | N/A |
| 10353630 | Prf1 /// COX2                | N/A | N/A |
| 10353632 | Bai3                         | N/A | N/A |
| 10353667 | ---                          | N/A | N/A |

|          |                                     |     |     |
|----------|-------------------------------------|-----|-----|
| 10353669 | 4931408C20Rik                       | N/A | N/A |
| 10353672 | ---                                 | N/A | N/A |
| 10353674 | Lsm5                                | N/A | N/A |
| 10353676 | Gm597                               | N/A | N/A |
| 10353679 | ---                                 | N/A | N/A |
| 10353684 | ---                                 | N/A | N/A |
| 10353686 | Gm9898                              | N/A | N/A |
| 10353689 | Phf3                                | N/A | N/A |
| 10353707 | Ptp4a1 /// Gm13363                  | N/A | N/A |
| 10353727 | ---                                 | N/A | N/A |
| 10353729 | Gm5415 /// 4930444G20Rik /// Gm9839 | N/A | N/A |
| 10353731 | Gm5415 /// 4930444G20Rik /// Gm9839 | N/A | N/A |
| 10353733 | Prim2                               | N/A | N/A |
| 10353754 | Zfp451                              | N/A | N/A |
| 10353773 | Gm15455                             | N/A | N/A |
| 10353775 | Bend6                               | N/A | N/A |
| 10353783 | Ccdc115                             | N/A | N/A |
| 10353786 | Prss40                              | N/A | N/A |
| 10353792 | 1700101119Rik                       | N/A | N/A |
| 10353794 | Fam168b                             | N/A | N/A |
| 10353803 | Uggt1                               | N/A | N/A |
| 10353849 | 4632411B12Rik                       | N/A | N/A |
| 10353871 | Lman2l                              | N/A | N/A |
| 10353878 | Ankrd23 /// Ankrd39                 | N/A | N/A |
| 10353891 | Ankrd39 /// Ankrd23                 | N/A | N/A |
| 10353934 | Actr1b                              | N/A | N/A |
| 10353947 | Tmem131                             | N/A | N/A |
| 10353989 | ---                                 | N/A | N/A |
| 10353991 | Rpl12 /// Rpl12-ps1                 | N/A | N/A |
| 10353993 | 6330578E17Rik                       | N/A | N/A |
| 10354003 | Mgat4a                              | N/A | N/A |
| 10354019 | 2010300C02Rik                       | N/A | N/A |
| 10354054 | Lipt1 /// Mitd1                     | N/A | N/A |
| 10354065 | Lyg2                                | N/A | N/A |
| 10354072 | Lyg1                                | N/A | N/A |
| 10354079 | Txndc9                              | N/A | N/A |
| 10354085 | Rev1 /// Eif5b                      | N/A | N/A |
| 10354111 | Aff3                                | N/A | N/A |
| 10354141 | Lonrf2                              | N/A | N/A |
| 10354157 | Chst10                              | N/A | N/A |
| 10354168 | Tbc1d8                              | N/A | N/A |
| 10354203 | ---                                 | N/A | N/A |
| 10354205 | ---                                 | N/A | N/A |
| 10354207 | Creg2                               | N/A | N/A |
| 10354216 | Rfx8                                | N/A | N/A |
| 10354220 | Mfsd9                               | N/A | N/A |
| 10354227 | ---                                 | N/A | N/A |
| 10354229 | 2610017109Rik                       | N/A | N/A |
| 10354233 | Tgfbrap1                            | N/A | N/A |
| 10354258 | Uxs1                                | N/A | N/A |
| 10354273 | ---                                 | N/A | N/A |
| 10354286 | Kdelc1                              | N/A | N/A |
| 10354307 | Txn1                                | N/A | N/A |
| 10354368 | ---                                 | N/A | N/A |
| 10354372 | Myl6 /// Gm8894                     | N/A | N/A |
| 10354374 | Slc40a1                             | N/A | N/A |
| 10354389 | Slc39a10                            | N/A | N/A |
| 10354400 | ---                                 | N/A | N/A |
| 10354404 | Dnajb6                              | N/A | N/A |
| 10354408 | ---                                 | N/A | N/A |
| 10354411 | ---                                 | N/A | N/A |
| 10354414 | ---                                 | N/A | N/A |
| 10354416 | ---                                 | N/A | N/A |
| 10354418 | Obfc2a                              | N/A | N/A |
| 10354432 | Myo1b                               | N/A | N/A |
| 10354468 | ---                                 | N/A | N/A |
| 10354470 | Rpl15 /// Gm4294                    | N/A | N/A |
| 10354472 | Gls                                 | N/A | N/A |
| 10354494 | Nab1                                | N/A | N/A |
| 10354504 | ---                                 | N/A | N/A |
| 10354506 | Mfsd6                               | N/A | N/A |
| 10354542 | Pms1                                | N/A | N/A |
| 10354555 | Asnsd1                              | N/A | N/A |
| 10354563 | Dnahc7b                             | N/A | N/A |
| 10354576 | Dnahc7a /// Dnahc7b                 | N/A | N/A |
| 10354581 | ---                                 | N/A | N/A |
| 10354588 | Stk17b                              | N/A | N/A |
| 10354598 | Hecw2                               | N/A | N/A |
| 10354630 | Gtf3c3                              | N/A | N/A |
| 10354644 | ---                                 | N/A | N/A |
| 10354647 | Pgap1                               | N/A | N/A |
| 10354649 | Pgap1                               | N/A | N/A |
| 10354677 | Ankrd44                             | N/A | N/A |
| 10354704 | Sf3b1                               | N/A | N/A |

|          |                                 |     |     |
|----------|---------------------------------|-----|-----|
| 10354730 | Coq10b                          | N/A | N/A |
| 10354732 | Hspd1                           | N/A | N/A |
| 10354737 | ---                             | N/A | N/A |
| 10354739 | Atp5l                           | N/A | N/A |
| 10354741 | Rftn2 /// Gm10561               | N/A | N/A |
| 10354753 | Boll                            | N/A | N/A |
| 10354768 | Akr1b3 /// Gm6644               | N/A | N/A |
| 10354777 | Satb2                           | N/A | N/A |
| 10354788 | ---                             | N/A | N/A |
| 10354792 | 1110034B05Rik /// 9430016H08Rik | N/A | N/A |
| 10354807 | Kctd18                          | N/A | N/A |
| 10354832 | Nif3l1 /// Ppil3                | N/A | N/A |
| 10354845 | Orc2                            | N/A | N/A |
| 10354868 | Fam126b                         | N/A | N/A |
| 10354881 | ---                             | N/A | N/A |
| 10354897 | Trak2                           | N/A | N/A |
| 10354916 | ---                             | N/A | N/A |
| 10354919 | ---                             | N/A | N/A |
| 10354938 | Als2cr4                         | N/A | N/A |
| 10354979 | Als2 /// Mpp4                   | N/A | N/A |
| 10355017 | Sumo1                           | N/A | N/A |
| 10355024 | Ica1l                           | N/A | N/A |
| 10355037 | Wdr12                           | N/A | N/A |
| 10355050 | Raph1                           | N/A | N/A |
| 10355069 | Ino80d                          | N/A | N/A |
| 10355084 | Ndufs1                          | N/A | N/A |
| 10355105 | ---                             | N/A | N/A |
| 10355109 | Gpr1                            | N/A | N/A |
| 10355113 | ---                             | N/A | N/A |
| 10355115 | Preli1                          | N/A | N/A |
| 10355138 | ---                             | N/A | N/A |
| 10355141 | Klf7                            | N/A | N/A |
| 10355147 | Fam119a                         | N/A | N/A |
| 10355152 | Fzd5                            | N/A | N/A |
| 10355173 | Rpl10a /// Rpl10a-ps2           | N/A | N/A |
| 10355193 | Crygc                           | N/A | N/A |
| 10355197 | ---                             | N/A | N/A |
| 10355199 | Crygb                           | N/A | N/A |
| 10355205 | D630023F18Rik                   | N/A | N/A |
| 10355214 | Idh1                            | N/A | N/A |
| 10355225 | ---                             | N/A | N/A |
| 10355227 | 1110028C15Rik /// Rpe           | N/A | N/A |
| 10355246 | Acadl                           | N/A | N/A |
| 10355264 | ---                             | N/A | N/A |
| 10355266 | Lanc1                           | N/A | N/A |
| 10355278 | Erbp4                           | N/A | N/A |
| 10355310 | ---                             | N/A | N/A |
| 10355312 | Ikzf2                           | N/A | N/A |
| 10355325 | Bard1                           | N/A | N/A |
| 10355327 | Bard1                           | N/A | N/A |
| 10355341 | ---                             | N/A | N/A |
| 10355403 | Fn1                             | N/A | N/A |
| 10355452 | ---                             | N/A | N/A |
| 10355454 | ---                             | N/A | N/A |
| 10355456 | Mreg                            | N/A | N/A |
| 10355474 | March4                          | N/A | N/A |
| 10355479 | Ankar                           | N/A | N/A |
| 10355500 | Igfbp5                          | N/A | N/A |
| 10355511 | Tnp1                            | N/A | N/A |
| 10355514 | Tns1                            | N/A | N/A |
| 10355528 | Tns1                            | N/A | N/A |
| 10355530 | Tns1                            | N/A | N/A |
| 10355532 | Tns1                            | N/A | N/A |
| 10355534 | Tns1                            | N/A | N/A |
| 10355550 | Cxcr1                           | N/A | N/A |
| 10355554 | Aamp                            | N/A | N/A |
| 10355567 | Tmbim1                          | N/A | N/A |
| 10355611 | Zfp142 /// Plcd4                | N/A | N/A |
| 10355628 | Rnf25                           | N/A | N/A |
| 10355658 | Fev                             | N/A | N/A |
| 10355668 | Mir375                          | N/A | N/A |
| 10355670 | Ccdc108                         | N/A | N/A |
| 10355711 | Nhej1                           | N/A | N/A |
| 10355717 | Slc23a3                         | N/A | N/A |
| 10355730 | 1810031K17Rik                   | N/A | N/A |
| 10355742 | Abcb6                           | N/A | N/A |
| 10355785 | Glb1l /// Ankzf1                | N/A | N/A |
| 10355813 | Ptpn                            | N/A | N/A |
| 10355844 | Dnpep                           | N/A | N/A |
| 10355893 | Epha4                           | N/A | N/A |
| 10355914 | ---                             | N/A | N/A |
| 10355931 | Farsb /// Sgpp2                 | N/A | N/A |
| 10355954 | BC035947                        | N/A | N/A |
| 10355958 | Ube2v1                          | N/A | N/A |



|          |                                                        |     |     |
|----------|--------------------------------------------------------|-----|-----|
| 10355967 | Ap1s3                                                  | N/A | N/A |
| 10355974 | Wdfy1                                                  | N/A | N/A |
| 10355984 | Serpine2                                               | N/A | N/A |
| 10355996 | Slc25a5                                                | N/A | N/A |
| 10356001 | Cul3                                                   | N/A | N/A |
| 10356018 | ---                                                    | N/A | N/A |
| 10356020 | Dock10                                                 | N/A | N/A |
| 10356082 | Plscr1                                                 | N/A | N/A |
| 10356084 | Irs1                                                   | N/A | N/A |
| 10356088 | Col4a4                                                 | N/A | N/A |
| 10356143 | ---                                                    | N/A | N/A |
| 10356145 | Slc19a3                                                | N/A | N/A |
| 10356154 | Sphkap                                                 | N/A | N/A |
| 10356170 | ---                                                    | N/A | N/A |
| 10356172 | Pid1                                                   | N/A | N/A |
| 10356177 | Dner                                                   | N/A | N/A |
| 10356194 | Trip12                                                 | N/A | N/A |
| 10356262 | Csprs /// Gm2619 /// Gm7592                            | N/A | N/A |
| 10356267 | A530032D15Rik                                          | N/A | N/A |
| 10356269 | A530032D15Rik /// Sp140                                | N/A | N/A |
| 10356271 | A530032D15Rik                                          | N/A | N/A |
| 10356274 | Csprs /// Gm7609 /// Gm7592                            | N/A | N/A |
| 10356278 | Sp110 /// C130026I21Rik /// LOC677525 /// LOC100041885 | N/A | N/A |
| 10356291 | A530040E14Rik                                          | N/A | N/A |
| 10356312 | Ncl                                                    | N/A | N/A |
| 10356329 | Snora75                                                | N/A | N/A |
| 10356331 | ---                                                    | N/A | N/A |
| 10356333 | Snord82                                                | N/A | N/A |
| 10356339 | Pde6d                                                  | N/A | N/A |
| 10356345 | Nppc                                                   | N/A | N/A |
| 10356351 | Rpl6 /// Gm6807                                        | N/A | N/A |
| 10356379 | Ecel1                                                  | N/A | N/A |
| 10356401 | ---                                                    | N/A | N/A |
| 10356403 | Kcnj13                                                 | N/A | N/A |
| 10356406 | Ngef                                                   | N/A | N/A |
| 10356457 | Dnajb3                                                 | N/A | N/A |
| 10356461 | Hjurp /// 6430706D22Rik                                | N/A | N/A |
| 10356475 | Arl4c                                                  | N/A | N/A |
| 10356482 | ---                                                    | N/A | N/A |
| 10356498 | Iqca                                                   | N/A | N/A |
| 10356508 | ---                                                    | N/A | N/A |
| 10356510 | Iqca                                                   | N/A | N/A |
| 10356512 | Iqca                                                   | N/A | N/A |
| 10356514 | Iqca                                                   | N/A | N/A |
| 10356577 | Ilkap /// Fam132b                                      | N/A | N/A |
| 10356593 | Hes6                                                   | N/A | N/A |
| 10356626 | ---                                                    | N/A | N/A |
| 10356628 | Hdac4                                                  | N/A | N/A |
| 10356657 | Ndufa10                                                | N/A | N/A |
| 10356671 | Olf1416                                                | N/A | N/A |
| 10356675 | Olf1414                                                | N/A | N/A |
| 10356710 | Capn10                                                 | N/A | N/A |
| 10356712 | Kif1a                                                  | N/A | N/A |
| 10356762 | LOC280487                                              | N/A | N/A |
| 10356764 | 2310007B03Rik                                          | N/A | N/A |
| 10356771 | Sned1 /// Mterfd2                                      | N/A | N/A |
| 10356778 | Rpl17                                                  | N/A | N/A |
| 10356780 | Pask                                                   | N/A | N/A |
| 10356800 | Hdlbp                                                  | N/A | N/A |
| 10356859 | Dtymk                                                  | N/A | N/A |
| 10356873 | ---                                                    | N/A | N/A |
| 10356876 | ---                                                    | N/A | N/A |
| 10356878 | ---                                                    | N/A | N/A |
| 10356880 | St8sia4                                                | N/A | N/A |
| 10356886 | Slco4c1                                                | N/A | N/A |
| 10356916 | ---                                                    | N/A | N/A |
| 10356932 | D1Ert622e                                              | N/A | N/A |
| 10356936 | Ppip5k2                                                | N/A | N/A |
| 10356968 | Pam                                                    | N/A | N/A |
| 10356995 | ---                                                    | N/A | N/A |
| 10356997 | ---                                                    | N/A | N/A |
| 10356999 | Prdx2                                                  | N/A | N/A |
| 10357001 | ---                                                    | N/A | N/A |
| 10357003 | Rnf152                                                 | N/A | N/A |
| 10357008 | Pign                                                   | N/A | N/A |
| 10357043 | Bcl2                                                   | N/A | N/A |
| 10357064 | Vps4b                                                  | N/A | N/A |
| 10357103 | Cdh19                                                  | N/A | N/A |
| 10357115 | Dsel                                                   | N/A | N/A |
| 10357120 | ---                                                    | N/A | N/A |
| 10357122 | ---                                                    | N/A | N/A |
| 10357124 | Tsn                                                    | N/A | N/A |
| 10357133 | ---                                                    | N/A | N/A |
| 10357155 | Inhbb                                                  | N/A | N/A |

|          |                    |     |     |
|----------|--------------------|-----|-----|
| 10357158 | Ralb               | N/A | N/A |
| 10357191 | Ptpn4              | N/A | N/A |
| 10357220 | Tmem177            | N/A | N/A |
| 10357242 | Dbi                | N/A | N/A |
| 10357249 | Steap3             | N/A | N/A |
| 10357288 | Htr5b              | N/A | N/A |
| 10357292 | Ddx18              | N/A | N/A |
| 10357298 | LOC280487          | N/A | N/A |
| 10357300 | Dpp10              | N/A | N/A |
| 10357328 | ---                | N/A | N/A |
| 10357332 | Actr3              | N/A | N/A |
| 10357339 | Gpr39 /// Lypd1    | N/A | N/A |
| 10357345 | Nckap5             | N/A | N/A |
| 10357371 | Tmem163            | N/A | N/A |
| 10357381 | Ysk4               | N/A | N/A |
| 10357454 | Dars               | N/A | N/A |
| 10357472 | Cxcr4              | N/A | N/A |
| 10357478 | Rpl31 /// Gm16382  | N/A | N/A |
| 10357514 | ---                | N/A | N/A |
| 10357516 | C4bp               | N/A | N/A |
| 10357535 | Pfkfb2             | N/A | N/A |
| 10357579 | Mapkapk2           | N/A | N/A |
| 10357594 | Rassf5             | N/A | N/A |
| 10357630 | Srgap2             | N/A | N/A |
| 10357656 | ---                | N/A | N/A |
| 10357658 | ---                | N/A | N/A |
| 10357660 | Mfsd4              | N/A | N/A |
| 10357696 | Gm10188            | N/A | N/A |
| 10357698 | Tmcc2              | N/A | N/A |
| 10357705 | Cntn2              | N/A | N/A |
| 10357736 | Nfasc              | N/A | N/A |
| 10357773 | Mdm4               | N/A | N/A |
| 10357788 | Ppp1r15b           | N/A | N/A |
| 10357833 | Atp2b4             | N/A | N/A |
| 10357856 | ---                | N/A | N/A |
| 10357875 | Btg2               | N/A | N/A |
| 10357878 | Adora1             | N/A | N/A |
| 10357886 | ---                | N/A | N/A |
| 10357932 | Ppp1r12b           | N/A | N/A |
| 10357944 | Ppp1r12b           | N/A | N/A |
| 10357946 | Ppp1r12b           | N/A | N/A |
| 10357948 | Ppp1r12b           | N/A | N/A |
| 10357950 | Ppp1r12b           | N/A | N/A |
| 10357952 | Ppp1r12b           | N/A | N/A |
| 10357954 | Ppp1r12b           | N/A | N/A |
| 10358023 | Gpr3711            | N/A | N/A |
| 10358038 | Rnpep              | N/A | N/A |
| 10358050 | Timm17a            | N/A | N/A |
| 10358057 | Shisa4             | N/A | N/A |
| 10358064 | Ipo9               | N/A | N/A |
| 10358091 | Nav1               | N/A | N/A |
| 10358191 | Camsap1l1          | N/A | N/A |
| 10358210 | Nr5a2              | N/A | N/A |
| 10358259 | Nek7               | N/A | N/A |
| 10358272 | Lhx9               | N/A | N/A |
| 10358281 | ---                | N/A | N/A |
| 10358299 | EG214403 /// Cfhr1 | N/A | N/A |
| 10358324 | Cfhr3              | N/A | N/A |
| 10358330 | BC026782           | N/A | N/A |
| 10358339 | Cfh                | N/A | N/A |
| 10358357 | Gm4845             | N/A | N/A |
| 10358359 | Cdc73              | N/A | N/A |
| 10358379 | Trove2             | N/A | N/A |
| 10358389 | Rgs2               | N/A | N/A |
| 10358428 | ---                | N/A | N/A |
| 10358432 | Zfp825             | N/A | N/A |
| 10358457 | Bex4               | N/A | N/A |
| 10358459 | BC003331 /// Tpr   | N/A | N/A |
| 10358476 | Prg4               | N/A | N/A |
| 10358513 | Hmcn1              | N/A | N/A |
| 10358515 | Hmcn1              | N/A | N/A |
| 10358517 | Hmcn1              | N/A | N/A |
| 10358519 | Hmcn1              | N/A | N/A |
| 10358521 | Hmcn1              | N/A | N/A |
| 10358523 | Hmcn1              | N/A | N/A |
| 10358525 | Hmcn1              | N/A | N/A |
| 10358527 | Hmcn1              | N/A | N/A |
| 10358529 | Hmcn1              | N/A | N/A |
| 10358531 | Hmcn1              | N/A | N/A |
| 10358533 | Hmcn1              | N/A | N/A |
| 10358535 | Hmcn1              | N/A | N/A |
| 10358537 | Hmcn1              | N/A | N/A |
| 10358539 | Hmcn1              | N/A | N/A |
| 10358541 | Hmcn1              | N/A | N/A |

|          |               |     |     |
|----------|---------------|-----|-----|
| 10358543 | Hmcn1         | N/A | N/A |
| 10358545 | Hmcn1         | N/A | N/A |
| 10358547 | Hmcn1         | N/A | N/A |
| 10358549 | Hmcn1         | N/A | N/A |
| 10358553 | Hmcn1         | N/A | N/A |
| 10358555 | Hmcn1         | N/A | N/A |
| 10358557 | Hmcn1         | N/A | N/A |
| 10358559 | Hmcn1         | N/A | N/A |
| 10358561 | Hmcn1         | N/A | N/A |
| 10358563 | Hmcn1         | N/A | N/A |
| 10358565 | Hmcn1         | N/A | N/A |
| 10358567 | Hmcn1         | N/A | N/A |
| 10358569 | Hmcn1         | N/A | N/A |
| 10358571 | Hmcn1         | N/A | N/A |
| 10358573 | Hmcn1         | N/A | N/A |
| 10358575 | Hmcn1         | N/A | N/A |
| 10358577 | Hmcn1         | N/A | N/A |
| 10358579 | Hmcn1         | N/A | N/A |
| 10358581 | Hmcn1         | N/A | N/A |
| 10358583 | Hmcn1         | N/A | N/A |
| 10358585 | Hmcn1         | N/A | N/A |
| 10358587 | Hmcn1         | N/A | N/A |
| 10358589 | Hmcn1         | N/A | N/A |
| 10358591 | Hmcn1         | N/A | N/A |
| 10358593 | Hmcn1         | N/A | N/A |
| 10358595 | Hmcn1         | N/A | N/A |
| 10358597 | Hmcn1         | N/A | N/A |
| 10358599 | Hmcn1         | N/A | N/A |
| 10358601 | Hmcn1         | N/A | N/A |
| 10358603 | Hmcn1         | N/A | N/A |
| 10358607 | Hmcn1         | N/A | N/A |
| 10358609 | Hmcn1         | N/A | N/A |
| 10358611 | Hmcn1         | N/A | N/A |
| 10358613 | Hmcn1         | N/A | N/A |
| 10358615 | Hmcn1         | N/A | N/A |
| 10358617 | Hmcn1         | N/A | N/A |
| 10358619 | Hmcn1         | N/A | N/A |
| 10358621 | Hmcn1         | N/A | N/A |
| 10358623 | Hmcn1         | N/A | N/A |
| 10358625 | Hmcn1         | N/A | N/A |
| 10358627 | Hmcn1         | N/A | N/A |
| 10358629 | Hmcn1         | N/A | N/A |
| 10358631 | Hmcn1         | N/A | N/A |
| 10358633 | Hmcn1         | N/A | N/A |
| 10358635 | Hmcn1         | N/A | N/A |
| 10358648 | Hmcn1         | N/A | N/A |
| 10358650 | Hmcn1         | N/A | N/A |
| 10358652 | Hmcn1         | N/A | N/A |
| 10358654 | Hmcn1         | N/A | N/A |
| 10358656 | Hmcn1         | N/A | N/A |
| 10358658 | Hmcn1         | N/A | N/A |
| 10358660 | Hmcn1         | N/A | N/A |
| 10358662 | Hmcn1         | N/A | N/A |
| 10358664 | Hmcn1         | N/A | N/A |
| 10358666 | Hmcn1         | N/A | N/A |
| 10358668 | Hmcn1         | N/A | N/A |
| 10358670 | Hmcn1         | N/A | N/A |
| 10358672 | Hmcn1         | N/A | N/A |
| 10358675 | lvs1abp       | N/A | N/A |
| 10358677 | 1200016B10Rik | N/A | N/A |
| 10358698 | Rnf2          | N/A | N/A |
| 10358709 | Cox7b         | N/A | N/A |
| 10358711 | ---           | N/A | N/A |
| 10358713 | 1700025G04Rik | N/A | N/A |
| 10358717 | 1700025G04Rik | N/A | N/A |
| 10358726 | Tsen15        | N/A | N/A |
| 10358733 | Rgl1          | N/A | N/A |
| 10358754 | ---           | N/A | N/A |
| 10358757 | Smg7          | N/A | N/A |
| 10358816 | Lamc1         | N/A | N/A |
| 10358849 | Dhx9          | N/A | N/A |
| 10358892 | F630010C12Rik | N/A | N/A |
| 10358894 | Sord          | N/A | N/A |
| 10358921 | 5830403L16Rik | N/A | N/A |
| 10358926 | ---           | N/A | N/A |
| 10358928 | Cacna1e       | N/A | N/A |
| 10358978 | ler5          | N/A | N/A |
| 10358982 | Mr1           | N/A | N/A |
| 10358999 | Xpr1          | N/A | N/A |
| 10359024 | ---           | N/A | N/A |
| 10359034 | Qsox1         | N/A | N/A |
| 10359050 | Cep350        | N/A | N/A |
| 10359078 | Cep350        | N/A | N/A |
| 10359080 | Cep350        | N/A | N/A |

|          |                             |     |     |
|----------|-----------------------------|-----|-----|
| 10359082 | Cep350                      | N/A | N/A |
| 10359084 | Cep350                      | N/A | N/A |
| 10359086 | Cep350                      | N/A | N/A |
| 10359097 | Tor1aip1                    | N/A | N/A |
| 10359113 | Fam163a                     | N/A | N/A |
| 10359161 | Soat1                       | N/A | N/A |
| 10359181 | Tor3a                       | N/A | N/A |
| 10359190 | Fam20b                      | N/A | N/A |
| 10359201 | Ralgps2                     | N/A | N/A |
| 10359235 | Rasal2                      | N/A | N/A |
| 10359280 | Pappa2                      | N/A | N/A |
| 10359293 | 1600012P17Rik               | N/A | N/A |
| 10359297 | Atp5h /// Gm4953 /// Gm5048 | N/A | N/A |
| 10359339 | Rabgap1l                    | N/A | N/A |
| 10359375 | Gpr52                       | N/A | N/A |
| 10359377 | Zbtb37                      | N/A | N/A |
| 10359386 | Dars2                       | N/A | N/A |
| 10359405 | Kih120                      | N/A | N/A |
| 10359419 | 4930469G21Rik               | N/A | N/A |
| 10359422 | Prdx6                       | N/A | N/A |
| 10359428 | Aph1a                       | N/A | N/A |
| 10359446 | Al848100                    | N/A | N/A |
| 10359480 | Dnm3                        | N/A | N/A |
| 10359504 | Dnm3os                      | N/A | N/A |
| 10359518 | Eif4e1b                     | N/A | N/A |
| 10359525 | Bat2l2                      | N/A | N/A |
| 10359561 | Fmo4                        | N/A | N/A |
| 10359582 | Fmo2                        | N/A | N/A |
| 10359624 | Prrx1                       | N/A | N/A |
| 10359635 | Gorab                       | N/A | N/A |
| 10359642 | LOC280487                   | N/A | N/A |
| 10359644 | Mettl11b                    | N/A | N/A |
| 10359689 | Atp1b1                      | N/A | N/A |
| 10359734 | Dcaf6                       | N/A | N/A |
| 10359754 | Mpzl1                       | N/A | N/A |
| 10359770 | Pou2f1                      | N/A | N/A |
| 10359814 | Ildr2                       | N/A | N/A |
| 10359816 | Pogk                        | N/A | N/A |
| 10359826 | Uqcr11                      | N/A | N/A |
| 10359849 | Uck2                        | N/A | N/A |
| 10359851 | Uck2                        | N/A | N/A |
| 10359859 | ---                         | N/A | N/A |
| 10359861 | Mgst3                       | N/A | N/A |
| 10359867 | Lrrc52                      | N/A | N/A |
| 10359870 | Pbx1                        | N/A | N/A |
| 10359888 | Gm5265                      | N/A | N/A |
| 10359908 | Rgs4                        | N/A | N/A |
| 10359917 | Hsd17b7                     | N/A | N/A |
| 10359929 | Ddr2                        | N/A | N/A |
| 10359948 | Uap1                        | N/A | N/A |
| 10359961 | Uhmk1                       | N/A | N/A |
| 10359970 | Nos1ap                      | N/A | N/A |
| 10359982 | Atf6                        | N/A | N/A |
| 10360001 | ---                         | N/A | N/A |
| 10360012 | Fcrlb                       | N/A | N/A |
| 10360026 | Uqcrb /// Gm5457            | N/A | N/A |
| 10360040 | Fcgr3                       | N/A | N/A |
| 10360046 | Sdhc                        | N/A | N/A |
| 10360053 | Pcp4l1                      | N/A | N/A |
| 10360058 | Tomm40l                     | N/A | N/A |
| 10360070 | Fcer1g                      | N/A | N/A |
| 10360076 | Ndufs2                      | N/A | N/A |
| 10360090 | Ppox                        | N/A | N/A |
| 10360105 | Usp21                       | N/A | N/A |
| 10360120 | Ufc1                        | N/A | N/A |
| 10360130 | Nit1 /// Dedd               | N/A | N/A |
| 10360139 | Klhdc9                      | N/A | N/A |
| 10360145 | B930036N10Rik               | N/A | N/A |
| 10360147 | Refbp2                      | N/A | N/A |
| 10360185 | ---                         | N/A | N/A |
| 10360205 | Ncstn /// Copa              | N/A | N/A |
| 10360225 | Timm23                      | N/A | N/A |
| 10360227 | Pea15a                      | N/A | N/A |
| 10360270 | Atp1a2                      | N/A | N/A |
| 10360321 | Dusp23                      | N/A | N/A |
| 10360324 | Gm2710                      | N/A | N/A |
| 10360332 | ---                         | N/A | N/A |
| 10360336 | Olf1406                     | N/A | N/A |
| 10360349 | Cadm3                       | N/A | N/A |
| 10360367 | ---                         | N/A | N/A |
| 10360377 | Al607873                    | N/A | N/A |
| 10360391 | Ifi203                      | N/A | N/A |
| 10360410 | Olf1231                     | N/A | N/A |
| 10360415 | Grem2                       | N/A | N/A |

|          |                                |     |     |
|----------|--------------------------------|-----|-----|
| 10360418 | Rgs7                           | N/A | N/A |
| 10360443 | Fh1                            | N/A | N/A |
| 10360454 | Opn3                           | N/A | N/A |
| 10360460 | Chml                           | N/A | N/A |
| 10360463 | Pld5                           | N/A | N/A |
| 10360479 | Cep170                         | N/A | N/A |
| 10360504 | Mir350                         | N/A | N/A |
| 10360506 | Akt3                           | N/A | N/A |
| 10360538 | Pppde1                         | N/A | N/A |
| 10360540 | 4930527J03Rik                  | N/A | N/A |
| 10360542 | AI503316 /// Fam36a            | N/A | N/A |
| 10360544 | Hnrnpu                         | N/A | N/A |
| 10360578 | Rpl29 /// Gm3550 /// Rpl29-ps2 | N/A | N/A |
| 10360580 | Tfb2m                          | N/A | N/A |
| 10360589 | Ahctf1                         | N/A | N/A |
| 10360629 | Rpl21                          | N/A | N/A |
| 10360648 | Psen2                          | N/A | N/A |
| 10360662 | Gm5069                         | N/A | N/A |
| 10360664 | 6330403A02Rik /// Gm10001      | N/A | N/A |
| 10360679 | H3f3a /// Gm12657              | N/A | N/A |
| 10360684 | Ephx1                          | N/A | N/A |
| 10360695 | Nvl                            | N/A | N/A |
| 10360737 | Rpl35a                         | N/A | N/A |
| 10360741 | Ccdc121                        | N/A | N/A |
| 10360745 | Lbr                            | N/A | N/A |
| 10360764 | Enah                           | N/A | N/A |
| 10360789 | Degs1                          | N/A | N/A |
| 10360794 | Fbxo28                         | N/A | N/A |
| 10360802 | ---                            | N/A | N/A |
| 10360804 | Gm10517                        | N/A | N/A |
| 10360832 | 1700056E22Rik                  | N/A | N/A |
| 10360840 | Mosc1                          | N/A | N/A |
| 10360848 | Mosc2                          | N/A | N/A |
| 10360858 | C130074G19Rik                  | N/A | N/A |
| 10360863 | Mark1                          | N/A | N/A |
| 10360884 | Iars2                          | N/A | N/A |
| 10360909 | 9630028B13Rik                  | N/A | N/A |
| 10360912 | ---                            | N/A | N/A |
| 10360914 | Lyplal1                        | N/A | N/A |
| 10360920 | Tgfb2                          | N/A | N/A |
| 10360934 | Rrp15                          | N/A | N/A |
| 10360957 | Kctd3                          | N/A | N/A |
| 10360972 | Kcnk2                          | N/A | N/A |
| 10360983 | Pdcd5                          | N/A | N/A |
| 10361021 | ---                            | N/A | N/A |
| 10361023 | Prox1                          | N/A | N/A |
| 10361031 | Rps6kc1                        | N/A | N/A |
| 10361055 | Vash2                          | N/A | N/A |
| 10361063 | ---                            | N/A | N/A |
| 10361065 | Mfsd7b                         | N/A | N/A |
| 10361075 | Mfsd7b                         | N/A | N/A |
| 10361078 | Tatdn3                         | N/A | N/A |
| 10361089 | Fam71a                         | N/A | N/A |
| 10361098 | Nenf                           | N/A | N/A |
| 10361104 | Ppp2r5a /// Tmem206            | N/A | N/A |
| 10361129 | ---                            | N/A | N/A |
| 10361131 | ---                            | N/A | N/A |
| 10361133 | ---                            | N/A | N/A |
| 10361135 | Slc30a1 /// 1700034H15Rik      | N/A | N/A |
| 10361152 | Gstp2 /// Gstp1                | N/A | N/A |
| 10361156 | Rcor3                          | N/A | N/A |
| 10361184 | A730013G03Rik                  | N/A | N/A |
| 10361186 | Sertad4                        | N/A | N/A |
| 10361191 | Syt14                          | N/A | N/A |
| 10361200 | AA408296                       | N/A | N/A |
| 10361234 | Hsd11b1                        | N/A | N/A |
| 10361246 | G0s2                           | N/A | N/A |
| 10361250 | Camk1g                         | N/A | N/A |
| 10361267 | ---                            | N/A | N/A |
| 10361270 | Cd46                           | N/A | N/A |
| 10361323 | Cnksr3                         | N/A | N/A |
| 10361356 | ---                            | N/A | N/A |
| 10361358 | Rgs17                          | N/A | N/A |
| 10361366 | Mtrf1l                         | N/A | N/A |
| 10361381 | Syne1                          | N/A | N/A |
| 10361507 | ---                            | N/A | N/A |
| 10361509 | Syne1                          | N/A | N/A |
| 10361620 | Rmnd1 /// Gm5512               | N/A | N/A |
| 10361640 | ---                            | N/A | N/A |
| 10361642 | Lrp11                          | N/A | N/A |
| 10361651 | Nup43                          | N/A | N/A |
| 10361660 | Lats1                          | N/A | N/A |
| 10361669 | Katna1                         | N/A | N/A |
| 10361682 | Ppil4                          | N/A | N/A |

|          |                                     |     |     |
|----------|-------------------------------------|-----|-----|
| 10361698 | Zc3h12d                             | N/A | N/A |
| 10361705 | Sash1                               | N/A | N/A |
| 10361708 | ---                                 | N/A | N/A |
| 10361710 | Gm5177                              | N/A | N/A |
| 10361748 | Fbxo30                              | N/A | N/A |
| 10361754 | Epm2a                               | N/A | N/A |
| 10361760 | Timm8a1                             | N/A | N/A |
| 10361763 | ---                                 | N/A | N/A |
| 10361767 | Sf3b5                               | N/A | N/A |
| 10361771 | Plagl1                              | N/A | N/A |
| 10361787 | ---                                 | N/A | N/A |
| 10361790 | Fuca2                               | N/A | N/A |
| 10361799 | Adat2                               | N/A | N/A |
| 10361807 | Hivep2                              | N/A | N/A |
| 10361824 | ---                                 | N/A | N/A |
| 10361846 | Reps1                               | N/A | N/A |
| 10361867 | Gm10827                             | N/A | N/A |
| 10361882 | Nhs1                                | N/A | N/A |
| 10361887 | Perp                                | N/A | N/A |
| 10361892 | ---                                 | N/A | N/A |
| 10361897 | lfng1                               | N/A | N/A |
| 10361926 | Map3k5                              | N/A | N/A |
| 10361956 | Mtap7                               | N/A | N/A |
| 10361977 | Gm6251                              | N/A | N/A |
| 10361979 | Bclaf1                              | N/A | N/A |
| 10362003 | F730021E23Rik                       | N/A | N/A |
| 10362005 | Ahi1                                | N/A | N/A |
| 10362036 | Hbs1l                               | N/A | N/A |
| 10362052 | Aldh8a1                             | N/A | N/A |
| 10362062 | 1700021A07Rik                       | N/A | N/A |
| 10362073 | Sgk1                                | N/A | N/A |
| 10362102 | Gm10825                             | N/A | N/A |
| 10362104 | Slc2a12                             | N/A | N/A |
| 10362111 | ---                                 | N/A | N/A |
| 10362113 | Gm10824                             | N/A | N/A |
| 10362115 | 1110021L09Rik                       | N/A | N/A |
| 10362129 | Vnn3                                | N/A | N/A |
| 10362138 | Vnn1                                | N/A | N/A |
| 10362147 | Taar1                               | N/A | N/A |
| 10362156 | Taar5                               | N/A | N/A |
| 10362158 | Taar7b                              | N/A | N/A |
| 10362162 | Taar7d                              | N/A | N/A |
| 10362164 | Taar7e                              | N/A | N/A |
| 10362168 | Taar8b                              | N/A | N/A |
| 10362171 | Stx7                                | N/A | N/A |
| 10362208 | ---                                 | N/A | N/A |
| 10362210 | Med23                               | N/A | N/A |
| 10362243 | ---                                 | N/A | N/A |
| 10362271 | ---                                 | N/A | N/A |
| 10362273 | Tmem200a /// Gm9767                 | N/A | N/A |
| 10362294 | Arhgap18                            | N/A | N/A |
| 10362310 | Ube2l3 /// LOC100502680 /// Gm10145 | N/A | N/A |
| 10362314 | Ptprk                               | N/A | N/A |
| 10362359 | Pebp1                               | N/A | N/A |
| 10362363 | 6330407J23Rik                       | N/A | N/A |
| 10362372 | 9330159F19Rik                       | N/A | N/A |
| 10362379 | Echdc1                              | N/A | N/A |
| 10362387 | ---                                 | N/A | N/A |
| 10362389 | ---                                 | N/A | N/A |
| 10362394 | Hddc2                               | N/A | N/A |
| 10362402 | ---                                 | N/A | N/A |
| 10362418 | Trdn                                | N/A | N/A |
| 10362420 | Trdn                                | N/A | N/A |
| 10362424 | Trdn                                | N/A | N/A |
| 10362426 | Trdn                                | N/A | N/A |
| 10362428 | Trdn                                | N/A | N/A |
| 10362432 | Trdn                                | N/A | N/A |
| 10362434 | Trdn                                | N/A | N/A |
| 10362440 | Trdn                                | N/A | N/A |
| 10362442 | Trdn                                | N/A | N/A |
| 10362446 | Trdn                                | N/A | N/A |
| 10362450 | Trdn                                | N/A | N/A |
| 10362462 | Trdn                                | N/A | N/A |
| 10362472 | Rsph4a                              | N/A | N/A |
| 10362487 | Tspyl1                              | N/A | N/A |
| 10362490 | Tspyl4                              | N/A | N/A |
| 10362495 | Col10a1                             | N/A | N/A |
| 10362511 | Gstm3                               | N/A | N/A |
| 10362513 | Hs3st5                              | N/A | N/A |
| 10362520 | Hdac2                               | N/A | N/A |
| 10362534 | 5930403N24Rik                       | N/A | N/A |
| 10362536 | ---                                 | N/A | N/A |
| 10362581 | Tube1                               | N/A | N/A |
| 10362593 | Npm1                                | N/A | N/A |

|          |                                                        |     |     |
|----------|--------------------------------------------------------|-----|-----|
| 10362596 | Fyn                                                    | N/A | N/A |
| 10362615 | Traf3ip2                                               | N/A | N/A |
| 10362628 | ---                                                    | N/A | N/A |
| 10362630 | ---                                                    | N/A | N/A |
| 10362633 | Rev3l                                                  | N/A | N/A |
| 10362669 | 4930547M16Rik                                          | N/A | N/A |
| 10362674 | Rnu3a                                                  | N/A | N/A |
| 10362676 | Cdk19                                                  | N/A | N/A |
| 10362717 | Wasf1                                                  | N/A | N/A |
| 10362745 | Akd1                                                   | N/A | N/A |
| 10362758 | Zbtb24                                                 | N/A | N/A |
| 10362794 | Ppil6 /// Smpd2                                        | N/A | N/A |
| 10362803 | Cd164                                                  | N/A | N/A |
| 10362823 | Snx3                                                   | N/A | N/A |
| 10362829 | Ostm1                                                  | N/A | N/A |
| 10362837 | Sec63                                                  | N/A | N/A |
| 10362861 | Scml4                                                  | N/A | N/A |
| 10362874 | 9030612E09Rik                                          | N/A | N/A |
| 10362876 | Pds2                                                   | N/A | N/A |
| 10362886 | Bend3                                                  | N/A | N/A |
| 10362896 | Cd24a                                                  | N/A | N/A |
| 10362899 | F830002L21Rik                                          | N/A | N/A |
| 10362902 | ---                                                    | N/A | N/A |
| 10362904 | Rtn4ip1                                                | N/A | N/A |
| 10362916 | Aim1                                                   | N/A | N/A |
| 10362922 | Atg5                                                   | N/A | N/A |
| 10362934 | ---                                                    | N/A | N/A |
| 10362937 | ---                                                    | N/A | N/A |
| 10362939 | ---                                                    | N/A | N/A |
| 10362941 | Prep                                                   | N/A | N/A |
| 10362968 | Bves                                                   | N/A | N/A |
| 10363005 | LOC280487                                              | N/A | N/A |
| 10363007 | Ascc3                                                  | N/A | N/A |
| 10363054 | ---                                                    | N/A | N/A |
| 10363056 | Sim1                                                   | N/A | N/A |
| 10363130 | Gopc                                                   | N/A | N/A |
| 10363137 | Nus1                                                   | N/A | N/A |
| 10363144 | Gm10674 /// Gm7360                                     | N/A | N/A |
| 10363146 | Slc35f1                                                | N/A | N/A |
| 10363157 | Pln                                                    | N/A | N/A |
| 10363161 | Tmem229b /// Gm5423                                    | N/A | N/A |
| 10363163 | Asf1a                                                  | N/A | N/A |
| 10363170 | Msl3l2                                                 | N/A | N/A |
| 10363173 | Gja1                                                   | N/A | N/A |
| 10363178 | Npm1                                                   | N/A | N/A |
| 10363181 | Stard6 /// Gm9795                                      | N/A | N/A |
| 10363185 | Gm9956                                                 | N/A | N/A |
| 10363195 | Hsf2                                                   | N/A | N/A |
| 10363224 | Fabp7                                                  | N/A | N/A |
| 10363231 | Smpdl3a                                                | N/A | N/A |
| 10363241 | Gcc2                                                   | N/A | N/A |
| 10363281 | Ranbp2                                                 | N/A | N/A |
| 10363331 | ---                                                    | N/A | N/A |
| 10363333 | Sh3rf3                                                 | N/A | N/A |
| 10363346 | Ankrd57                                                | N/A | N/A |
| 10363350 | P4ha1                                                  | N/A | N/A |
| 10363368 | Timm23                                                 | N/A | N/A |
| 10363372 | Pla2g12b                                               | N/A | N/A |
| 10363377 | Gm10322                                                | N/A | N/A |
| 10363379 | Cbara1                                                 | N/A | N/A |
| 10363392 | Dnajb12                                                | N/A | N/A |
| 10363403 | Ascc1                                                  | N/A | N/A |
| 10363415 | Spock2                                                 | N/A | N/A |
| 10363430 | Psap                                                   | N/A | N/A |
| 10363445 | 4632428N05Rik                                          | N/A | N/A |
| 10363455 | Pcbd1                                                  | N/A | N/A |
| 10363479 | Rpl27a /// Gm5908 /// Rpl27a-ps1 /// Gm6378 /// Gm5453 | N/A | N/A |
| 10363481 | Nodal                                                  | N/A | N/A |
| 10363486 | Lrrc20                                                 | N/A | N/A |
| 10363498 | Ppa1                                                   | N/A | N/A |
| 10363512 | Sar1a                                                  | N/A | N/A |
| 10363522 | Tysnd1                                                 | N/A | N/A |
| 10363528 | Aifm2                                                  | N/A | N/A |
| 10363541 | Ass1 /// Gm5424                                        | N/A | N/A |
| 10363557 | Supv3l1 /// 4930507D05Rik                              | N/A | N/A |
| 10363559 | 2510003E04Rik                                          | N/A | N/A |
| 10363561 | LOC280487                                              | N/A | N/A |
| 10363563 | Slc25a16                                               | N/A | N/A |
| 10363575 | Dna2                                                   | N/A | N/A |
| 10363599 | Rufy2                                                  | N/A | N/A |
| 10363622 | 3110049J23Rik                                          | N/A | N/A |
| 10363629 | Pbld                                                   | N/A | N/A |
| 10363639 | Atoh7                                                  | N/A | N/A |
| 10363641 | Herc4                                                  | N/A | N/A |

|          |                                 |     |     |
|----------|---------------------------------|-----|-----|
| 10363667 | Sirt1 /// Gm10114               | N/A | N/A |
| 10363696 | D630028G08Rik                   | N/A | N/A |
| 10363699 | Rps6 /// Gm16409                | N/A | N/A |
| 10363701 | ---                             | N/A | N/A |
| 10363703 | Jmjd1c                          | N/A | N/A |
| 10363706 | Jmjd1c                          | N/A | N/A |
| 10363741 | Gm10797                         | N/A | N/A |
| 10363773 | Rhobtb1                         | N/A | N/A |
| 10363786 | Ank3                            | N/A | N/A |
| 10363845 | Ccdc6                           | N/A | N/A |
| 10363860 | Slc16a9                         | N/A | N/A |
| 10363868 | Fam13c /// Phyhipl              | N/A | N/A |
| 10363894 | Ipmk                            | N/A | N/A |
| 10363901 | Etv5                            | N/A | N/A |
| 10363903 | Hbs1l                           | N/A | N/A |
| 10363905 | Zwint                           | N/A | N/A |
| 10363915 | Pcdh15                          | N/A | N/A |
| 10363917 | ---                             | N/A | N/A |
| 10363921 | Pcdh15                          | N/A | N/A |
| 10363970 | Rab36                           | N/A | N/A |
| 10363983 | Bcr                             | N/A | N/A |
| 10364009 | Bcr                             | N/A | N/A |
| 10364011 | Specc1l                         | N/A | N/A |
| 10364030 | Adora2a                         | N/A | N/A |
| 10364038 | Upb1                            | N/A | N/A |
| 10364049 | ---                             | N/A | N/A |
| 10364051 | Snrpd3                          | N/A | N/A |
| 10364091 | ---                             | N/A | N/A |
| 10364093 | Derf3                           | N/A | N/A |
| 10364102 | Chchd10                         | N/A | N/A |
| 10364109 | Vpreb3                          | N/A | N/A |
| 10364130 | Zfp280b                         | N/A | N/A |
| 10364149 | S100b                           | N/A | N/A |
| 10364153 | Pcnt /// Gm9744                 | N/A | N/A |
| 10364194 | Lss                             | N/A | N/A |
| 10364222 | Ftcd                            | N/A | N/A |
| 10364237 | Gm10787                         | N/A | N/A |
| 10364249 | ---                             | N/A | N/A |
| 10364251 | Pofut2                          | N/A | N/A |
| 10364280 | Pttg1ip                         | N/A | N/A |
| 10364293 | Ube2g2                          | N/A | N/A |
| 10364315 | LOC16697                        | N/A | N/A |
| 10364317 | ---                             | N/A | N/A |
| 10364319 | ---                             | N/A | N/A |
| 10364324 | ---                             | N/A | N/A |
| 10364326 | Krtap10-10                      | N/A | N/A |
| 10364328 | Gm3238 /// Gm10318              | N/A | N/A |
| 10364338 | 1810043G02Rik                   | N/A | N/A |
| 10364371 | ---                             | N/A | N/A |
| 10364373 | Lsm7                            | N/A | N/A |
| 10364375 | Cstb                            | N/A | N/A |
| 10364379 | ---                             | N/A | N/A |
| 10364381 | Olf1358                         | N/A | N/A |
| 10364383 | ---                             | N/A | N/A |
| 10364402 | Slc1a6                          | N/A | N/A |
| 10364413 | Olf1355                         | N/A | N/A |
| 10364415 | Olf1355 /// Olf1352 /// Olf1354 | N/A | N/A |
| 10364417 | Olf1355                         | N/A | N/A |
| 10364424 | Olf1352                         | N/A | N/A |
| 10364435 | Gm2889                          | N/A | N/A |
| 10364451 | Gm16517                         | N/A | N/A |
| 10364455 | Cdc34                           | N/A | N/A |
| 10364468 | Bsg                             | N/A | N/A |
| 10364478 | Hcn2                            | N/A | N/A |
| 10364489 | Fgf22                           | N/A | N/A |
| 10364518 | Ptbp1                           | N/A | N/A |
| 10364542 | Cfd                             | N/A | N/A |
| 10364548 | ---                             | N/A | N/A |
| 10364550 | Kiss1r                          | N/A | N/A |
| 10364571 | Wdr18                           | N/A | N/A |
| 10364683 | Stk11                           | N/A | N/A |
| 10364696 | Atp5d                           | N/A | N/A |
| 10364712 | Cirbp                           | N/A | N/A |
| 10364718 | 1600002K03Rik                   | N/A | N/A |
| 10364766 | Rps15                           | N/A | N/A |
| 10364769 | Apc2                            | N/A | N/A |
| 10364784 | Reep6                           | N/A | N/A |
| 10364810 | Onecut3                         | N/A | N/A |
| 10364814 | Scamp4 /// Adat3                | N/A | N/A |
| 10364824 | Csnk1g2                         | N/A | N/A |
| 10364856 | Dot1l                           | N/A | N/A |
| 10364888 | Dot1l                           | N/A | N/A |
| 10364890 | Sf3a2                           | N/A | N/A |
| 10364909 | Oaz1 /// Gm9786                 | N/A | N/A |



|          |                           |     |     |
|----------|---------------------------|-----|-----|
| 10364950 | Gadd45b                   | N/A | N/A |
| 10364971 | Map2k2                    | N/A | N/A |
| 10364984 | Zbtb7a                    | N/A | N/A |
| 10364990 | Eef2                      | N/A | N/A |
| 10365003 | Snord37                   | N/A | N/A |
| 10365005 | Dapk3                     | N/A | N/A |
| 10365015 | Zfr2                      | N/A | N/A |
| 10365056 | Apba3                     | N/A | N/A |
| 10365069 | Pip5k1c                   | N/A | N/A |
| 10365104 | F630110N24Rik             | N/A | N/A |
| 10365116 | Dohh                      | N/A | N/A |
| 10365123 | Dohh /// LOC100503793     | N/A | N/A |
| 10365125 | Dohh /// LOC100503793     | N/A | N/A |
| 10365127 | 2210404O07Rik             | N/A | N/A |
| 10365132 | Nfic                      | N/A | N/A |
| 10365134 | ---                       | N/A | N/A |
| 10365136 | Aes                       | N/A | N/A |
| 10365199 | Gm10778                   | N/A | N/A |
| 10365206 | Gm8290                    | N/A | N/A |
| 10365208 | Zfp873                    | N/A | N/A |
| 10365217 | Gm10776                   | N/A | N/A |
| 10365219 | Gm4924                    | N/A | N/A |
| 10365225 | Gm4924                    | N/A | N/A |
| 10365227 | Ap3m1                     | N/A | N/A |
| 10365230 | Gm9855 /// Tdg /// Gm5806 | N/A | N/A |
| 10365242 | Hcfc2                     | N/A | N/A |
| 10365260 | Txnrd1                    | N/A | N/A |
| 10365286 | Eid3                      | N/A | N/A |
| 10365288 | Taf10 /// Gm4799          | N/A | N/A |
| 10365290 | Chst11                    | N/A | N/A |
| 10365295 | ---                       | N/A | N/A |
| 10365297 | D10Wsu102e                | N/A | N/A |
| 10365302 | A230046K03Rik             | N/A | N/A |
| 10365335 | ---                       | N/A | N/A |
| 10365337 | ---                       | N/A | N/A |
| 10365344 | Tcp11l2                   | N/A | N/A |
| 10365408 | Ric8b                     | N/A | N/A |
| 10365420 | AI597468 /// Mterfd3      | N/A | N/A |
| 10365428 | Btd11                     | N/A | N/A |
| 10365450 | Pwp1                      | N/A | N/A |
| 10365471 | Fbxo7                     | N/A | N/A |
| 10365482 | Timp3                     | N/A | N/A |
| 10365518 | Nt5dc3                    | N/A | N/A |
| 10365535 | Tex18                     | N/A | N/A |
| 10365543 | Gm10764                   | N/A | N/A |
| 10365545 | Pah                       | N/A | N/A |
| 10365559 | Igf1                      | N/A | N/A |
| 10365572 | Tyms-ps                   | N/A | N/A |
| 10365574 | Pmch /// 4930547N16Rik    | N/A | N/A |
| 10365601 | Gnptab                    | N/A | N/A |
| 10365637 | Arl1                      | N/A | N/A |
| 10365658 | Uhrf1bp1l                 | N/A | N/A |
| 10365682 | Anks1b                    | N/A | N/A |
| 10365714 | Sec61g                    | N/A | N/A |
| 10365716 | Ikbip                     | N/A | N/A |
| 10365723 | ---                       | N/A | N/A |
| 10365727 | ---                       | N/A | N/A |
| 10365749 | Lta4h                     | N/A | N/A |
| 10365769 | Hal                       | N/A | N/A |
| 10365817 | Ntn4                      | N/A | N/A |
| 10365845 | Fgd6                      | N/A | N/A |
| 10365870 | Nr2c1                     | N/A | N/A |
| 10365887 | Ndufa12                   | N/A | N/A |
| 10365891 | Tmcc3                     | N/A | N/A |
| 10365918 | Ube2n                     | N/A | N/A |
| 10365926 | 4732465J04Rik             | N/A | N/A |
| 10365933 | Eea1                      | N/A | N/A |
| 10365966 | Gm5426                    | N/A | N/A |
| 10365974 | Dcn                       | N/A | N/A |
| 10365983 | Lum                       | N/A | N/A |
| 10366004 | Atp2b1                    | N/A | N/A |
| 10366026 | Poc1b                     | N/A | N/A |
| 10366038 | Galnt4                    | N/A | N/A |
| 10366043 | Dusp6                     | N/A | N/A |
| 10366052 | Kitl                      | N/A | N/A |
| 10366144 | Mgat4c                    | N/A | N/A |
| 10366153 | Rassf9                    | N/A | N/A |
| 10366161 | ---                       | N/A | N/A |
| 10366163 | Slc6a15                   | N/A | N/A |
| 10366178 | ---                       | N/A | N/A |
| 10366184 | ---                       | N/A | N/A |
| 10366186 | Ccdc59 /// BC067068       | N/A | N/A |
| 10366196 | Ppfia2                    | N/A | N/A |
| 10366229 | Lin7a                     | N/A | N/A |

|          |                               |     |     |
|----------|-------------------------------|-----|-----|
| 10366238 | Ppp1r12a                      | N/A | N/A |
| 10366275 | ---                           | N/A | N/A |
| 10366293 | Csrp2                         | N/A | N/A |
| 10366301 | Rpl6 /// Gm6807               | N/A | N/A |
| 10366310 | Osbpl8                        | N/A | N/A |
| 10366335 | Bbs10                         | N/A | N/A |
| 10366337 | Nap1l1                        | N/A | N/A |
| 10366344 | Gm5176                        | N/A | N/A |
| 10366346 | Phlda1                        | N/A | N/A |
| 10366350 | Krr1 /// Glipr1               | N/A | N/A |
| 10366391 | Kcnc2                         | N/A | N/A |
| 10366399 | Atxn7l3b                      | N/A | N/A |
| 10366401 | ---                           | N/A | N/A |
| 10366403 | ---                           | N/A | N/A |
| 10366405 | ---                           | N/A | N/A |
| 10366407 | Gm10752                       | N/A | N/A |
| 10366409 | Zfc3h1                        | N/A | N/A |
| 10366457 | Ptprr                         | N/A | N/A |
| 10366512 | ---                           | N/A | N/A |
| 10366514 | Kcnmb4 /// 1700058G18Rik      | N/A | N/A |
| 10366517 | Kcnmb4                        | N/A | N/A |
| 10366519 | Cnot2                         | N/A | N/A |
| 10366522 | Rpl29                         | N/A | N/A |
| 10366539 | Gm10747                       | N/A | N/A |
| 10366544 | Kifc5c-ps                     | N/A | N/A |
| 10366546 | Cpm                           | N/A | N/A |
| 10366579 | Cdc5l                         | N/A | N/A |
| 10366581 | Cdc5l                         | N/A | N/A |
| 10366593 | ---                           | N/A | N/A |
| 10366595 | Dyrk2 /// 4932442E05Rik       | N/A | N/A |
| 10366630 | Tmbim4                        | N/A | N/A |
| 10366665 | Rpl21 /// Gm16416 /// Gm8054  | N/A | N/A |
| 10366667 | Gns                           | N/A | N/A |
| 10366698 | BC048403                      | N/A | N/A |
| 10366705 | ---                           | N/A | N/A |
| 10366712 | Ppm1h                         | N/A | N/A |
| 10366725 | Fam19a2                       | N/A | N/A |
| 10366735 | 4930503E24Rik                 | N/A | N/A |
| 10366737 | ---                           | N/A | N/A |
| 10366767 | Ctdsp2 /// Mir26a-2           | N/A | N/A |
| 10366814 | Cdk4                          | N/A | N/A |
| 10366825 | Agap2                         | N/A | N/A |
| 10366846 | Os9                           | N/A | N/A |
| 10366864 | F420014N23Rik                 | N/A | N/A |
| 10366866 | Dctn2                         | N/A | N/A |
| 10366881 | Ddit3 /// Mars                | N/A | N/A |
| 10366909 | R3hdm2                        | N/A | N/A |
| 10366956 | Stat6                         | N/A | N/A |
| 10366983 | Tmem194                       | N/A | N/A |
| 10367024 | Tac2                          | N/A | N/A |
| 10367033 | Zbtb39                        | N/A | N/A |
| 10367041 | Rdh9                          | N/A | N/A |
| 10367045 | Rdh16                         | N/A | N/A |
| 10367059 | BC089597                      | N/A | N/A |
| 10367066 | Sdr9c7                        | N/A | N/A |
| 10367073 | Snrpd2 /// Gm5449 /// Gm10120 | N/A | N/A |
| 10367100 | Ptges3                        | N/A | N/A |
| 10367106 | Atp5b                         | N/A | N/A |
| 10367118 | ---                           | N/A | N/A |
| 10367120 | Mir677                        | N/A | N/A |
| 10367122 | Baz2a                         | N/A | N/A |
| 10367154 | Gls2                          | N/A | N/A |
| 10367215 | Apon                          | N/A | N/A |
| 10367224 | Stat2                         | N/A | N/A |
| 10367292 | Cs                            | N/A | N/A |
| 10367305 | Ankrd52                       | N/A | N/A |
| 10367335 | ---                           | N/A | N/A |
| 10367337 | Rnf41                         | N/A | N/A |
| 10367349 | Smarcc2                       | N/A | N/A |
| 10367422 | Sarnp                         | N/A | N/A |
| 10367434 | ---                           | N/A | N/A |
| 10367436 | Cd63                          | N/A | N/A |
| 10367471 | Olf9                          | N/A | N/A |
| 10367473 | Olf9                          | N/A | N/A |
| 10367475 | ---                           | N/A | N/A |
| 10367477 | Olf9                          | N/A | N/A |
| 10367479 | Olf9                          | N/A | N/A |
| 10367483 | Olf9 /// Olf9 /// Olf9        | N/A | N/A |
| 10367485 | Olf9                          | N/A | N/A |
| 10367489 | Olf9 /// Olf9 /// Olf9        | N/A | N/A |
| 10367493 | Olf9                          | N/A | N/A |
| 10367495 | Olf9                          | N/A | N/A |
| 10367499 | Olf9                          | N/A | N/A |
| 10367501 | ---                           | N/A | N/A |

|          |                                                    |     |     |
|----------|----------------------------------------------------|-----|-----|
| 10367503 | Olfr790                                            | N/A | N/A |
| 10367505 | Olfr791                                            | N/A | N/A |
| 10367509 | Olfr794                                            | N/A | N/A |
| 10367511 | Olfr799                                            | N/A | N/A |
| 10367515 | ---                                                | N/A | N/A |
| 10367524 | Olfr813                                            | N/A | N/A |
| 10367528 | Olfr821                                            | N/A | N/A |
| 10367530 | Olfr822                                            | N/A | N/A |
| 10367544 | Ctdsp2                                             | N/A | N/A |
| 10367579 | Gm3213                                             | N/A | N/A |
| 10367582 | Vip                                                | N/A | N/A |
| 10367591 | Myct1                                              | N/A | N/A |
| 10367598 | Gm10097                                            | N/A | N/A |
| 10367600 | Esr1                                               | N/A | N/A |
| 10367624 | ---                                                | N/A | N/A |
| 10367671 | ---                                                | N/A | N/A |
| 10367691 | lyd                                                | N/A | N/A |
| 10367697 | Ppp1r14c                                           | N/A | N/A |
| 10367708 | Pcmt1                                              | N/A | N/A |
| 10367717 | BC013529                                           | N/A | N/A |
| 10367726 | 6530403G13Rik                                      | N/A | N/A |
| 10367728 | Tab2                                               | N/A | N/A |
| 10367734 | Ust                                                | N/A | N/A |
| 10367744 | ---                                                | N/A | N/A |
| 10367746 | Sash1                                              | N/A | N/A |
| 10367768 | ---                                                | N/A | N/A |
| 10367770 | Gm9930                                             | N/A | N/A |
| 10367772 | Samd5                                              | N/A | N/A |
| 10367775 | Stxbp5                                             | N/A | N/A |
| 10367803 | ---                                                | N/A | N/A |
| 10367816 | 9130014G24Rik                                      | N/A | N/A |
| 10367822 | Rab32                                              | N/A | N/A |
| 10367828 | Grm1 /// Gm10828                                   | N/A | N/A |
| 10367830 | Grm1                                               | N/A | N/A |
| 10367843 | Utrn                                               | N/A | N/A |
| 10367945 | Phactr2                                            | N/A | N/A |
| 10367960 | Pex3                                               | N/A | N/A |
| 10367973 | Aig1                                               | N/A | N/A |
| 10368011 | Vta1                                               | N/A | N/A |
| 10368025 | Hspa8 /// LOC624853                                | N/A | N/A |
| 10368027 | Nmbr                                               | N/A | N/A |
| 10368041 | 3110003A17Rik                                      | N/A | N/A |
| 10368045 | 3110003A17Rik                                      | N/A | N/A |
| 10368050 | Ect2l /// LOC100045792                             | N/A | N/A |
| 10368052 | Ect2l /// LOC100045792                             | N/A | N/A |
| 10368054 | Ect2l /// LOC100045792                             | N/A | N/A |
| 10368056 | Ect2l /// LOC100045792                             | N/A | N/A |
| 10368058 | Ect2l /// LOC100045792                             | N/A | N/A |
| 10368060 | Ect2l /// LOC100045792                             | N/A | N/A |
| 10368062 | Ect2l /// LOC100045792                             | N/A | N/A |
| 10368064 | Ect2l /// LOC100045792                             | N/A | N/A |
| 10368066 | Ect2l /// LOC100045792                             | N/A | N/A |
| 10368068 | Ect2l /// LOC100045792                             | N/A | N/A |
| 10368075 | Ect2l /// LOC100045792                             | N/A | N/A |
| 10368077 | Ect2l /// LOC100045792                             | N/A | N/A |
| 10368079 | Ect2l /// LOC100045792                             | N/A | N/A |
| 10368083 | Ccdc28a                                            | N/A | N/A |
| 10368090 | ---                                                | N/A | N/A |
| 10368101 | D10Bwg1379e                                        | N/A | N/A |
| 10368159 | Slc35d3                                            | N/A | N/A |
| 10368162 | Pex7                                               | N/A | N/A |
| 10368173 | 4933406P04Rik                                      | N/A | N/A |
| 10368175 | Pde7b                                              | N/A | N/A |
| 10368193 | ---                                                | N/A | N/A |
| 10368197 | Gm10826                                            | N/A | N/A |
| 10368220 | ---                                                | N/A | N/A |
| 10368222 | 4930444G20Rik                                      | N/A | N/A |
| 10368227 | Ube2q2                                             | N/A | N/A |
| 10368229 | Tbpl1 /// Slc2a12                                  | N/A | N/A |
| 10368240 | Tcf21                                              | N/A | N/A |
| 10368268 | ---                                                | N/A | N/A |
| 10368277 | Rps12                                              | N/A | N/A |
| 10368279 | Taar6                                              | N/A | N/A |
| 10368281 | Taar7e /// Taar7f /// Taar7b /// Taar7a /// Taar7d | N/A | N/A |
| 10368287 | Taar9                                              | N/A | N/A |
| 10368289 | Enpp1                                              | N/A | N/A |
| 10368317 | Enpp3                                              | N/A | N/A |
| 10368343 | Arg1                                               | N/A | N/A |
| 10368356 | Akap7                                              | N/A | N/A |
| 10368370 | ---                                                | N/A | N/A |
| 10368380 | L3mbt13                                            | N/A | N/A |
| 10368473 | ---                                                | N/A | N/A |
| 10368475 | 4930519F09Rik                                      | N/A | N/A |
| 10368484 | Gm9996                                             | N/A | N/A |

|          |                               |     |     |
|----------|-------------------------------|-----|-----|
| 10368486 | Rnf146 /// Echdc1             | N/A | N/A |
| 10368495 | Rspo3                         | N/A | N/A |
| 10368504 | Rpl12                         | N/A | N/A |
| 10368527 | Hint3                         | N/A | N/A |
| 10368566 | Tpd5211                       | N/A | N/A |
| 10368575 | Supt4h1 /// Gm3258            | N/A | N/A |
| 10368585 | Nkain2                        | N/A | N/A |
| 10368596 | ---                           | N/A | N/A |
| 10368598 | Clvs2                         | N/A | N/A |
| 10368612 | Gapdh                         | N/A | N/A |
| 10368616 | Zufsp                         | N/A | N/A |
| 10368644 | Fam26f                        | N/A | N/A |
| 10368647 | Dse                           | N/A | N/A |
| 10368675 | Marcks                        | N/A | N/A |
| 10368681 | Rfpl4b                        | N/A | N/A |
| 10368683 | 1700025K23Rik                 | N/A | N/A |
| 10368689 | Wisp3                         | N/A | N/A |
| 10368700 | G630090E17Rik                 | N/A | N/A |
| 10368711 | ---                           | N/A | N/A |
| 10368713 | Al317395                      | N/A | N/A |
| 10368720 | Slc16a10                      | N/A | N/A |
| 10368730 | Rpf2                          | N/A | N/A |
| 10368739 | Gtf3c6                        | N/A | N/A |
| 10368762 | Cdc40                         | N/A | N/A |
| 10368780 | Gpr6                          | N/A | N/A |
| 10368782 | Fig4                          | N/A | N/A |
| 10368806 | Smpd2                         | N/A | N/A |
| 10368836 | ---                           | N/A | N/A |
| 10368875 | Armc2                         | N/A | N/A |
| 10368877 | Armc2                         | N/A | N/A |
| 10368881 | Armc2                         | N/A | N/A |
| 10368883 | Gm9855 /// Tdg /// Gm5806     | N/A | N/A |
| 10368886 | Foxo3                         | N/A | N/A |
| 10368888 | Foxo3                         | N/A | N/A |
| 10368893 | Lace1                         | N/A | N/A |
| 10368907 | Nr2e1                         | N/A | N/A |
| 10368918 | Sobp                          | N/A | N/A |
| 10368928 | Rpl41                         | N/A | N/A |
| 10368930 | 1700021F05Rik                 | N/A | N/A |
| 10368935 | Qrs1                          | N/A | N/A |
| 10368947 | Aim1                          | N/A | N/A |
| 10368979 | ---                           | N/A | N/A |
| 10368981 | Lin28b                        | N/A | N/A |
| 10368990 | ---                           | N/A | N/A |
| 10368992 | ---                           | N/A | N/A |
| 10368997 | C130030K03Rik                 | N/A | N/A |
| 10368999 | Grik2                         | N/A | N/A |
| 10369086 | Gopc                          | N/A | N/A |
| 10369102 | Gm9766                        | N/A | N/A |
| 10369132 | Fam184a                       | N/A | N/A |
| 10369154 | Man1a                         | N/A | N/A |
| 10369171 | 9530009G21Rik                 | N/A | N/A |
| 10369176 | D630037F22Rik                 | N/A | N/A |
| 10369206 | Rps8 /// Gm11353 /// Rps8-ps1 | N/A | N/A |
| 10369210 | Serinc1                       | N/A | N/A |
| 10369221 | 4933403O03Rik /// Dux         | N/A | N/A |
| 10369223 | 4933403O03Rik /// Dux         | N/A | N/A |
| 10369225 | 4933403O03Rik /// Dux         | N/A | N/A |
| 10369232 | Gm9919                        | N/A | N/A |
| 10369234 | ---                           | N/A | N/A |
| 10369250 | ---                           | N/A | N/A |
| 10369264 | Oit3                          | N/A | N/A |
| 10369288 | ---                           | N/A | N/A |
| 10369290 | Ddit4                         | N/A | N/A |
| 10369295 | Anapc16                       | N/A | N/A |
| 10369379 | Slc29a3                       | N/A | N/A |
| 10369388 | Unc5b                         | N/A | N/A |
| 10369413 | Sgpl1                         | N/A | N/A |
| 10369474 | Eif4ebp2                      | N/A | N/A |
| 10369479 | Lrrc20 /// D830039M14Rik      | N/A | N/A |
| 10369481 | H2afy2                        | N/A | N/A |
| 10369525 | 2010107G23Rik                 | N/A | N/A |
| 10369531 | Tspan15                       | N/A | N/A |
| 10369586 | Supv3l1 /// 4930507D05Rik     | N/A | N/A |
| 10369604 | Vps26a                        | N/A | N/A |
| 10369620 | 2510003E04Rik                 | N/A | N/A |
| 10369630 | Ddx21                         | N/A | N/A |
| 10369647 | Ddx50                         | N/A | N/A |
| 10369661 | Ccar1                         | N/A | N/A |
| 10369688 | Tet1                          | N/A | N/A |
| 10369690 | Tet1                          | N/A | N/A |
| 10369702 | Tet1                          | N/A | N/A |
| 10369704 | Hnrnp3                        | N/A | N/A |
| 10369735 | Herc4 /// 1700120B22Rik       | N/A | N/A |

|          |                                            |     |     |
|----------|--------------------------------------------|-----|-----|
| 10369738 | Sirt1                                      | N/A | N/A |
| 10369748 | Gm7075                                     | N/A | N/A |
| 10369750 | Gm10118                                    | N/A | N/A |
| 10369752 | Lrrtm3                                     | N/A | N/A |
| 10369761 | Reep3                                      | N/A | N/A |
| 10369774 | Nrbf2                                      | N/A | N/A |
| 10369783 | Zfp365                                     | N/A | N/A |
| 10369792 | Arid5b                                     | N/A | N/A |
| 10369806 | 1700040L02Rik                              | N/A | N/A |
| 10369825 | ---                                        | N/A | N/A |
| 10369828 | ---                                        | N/A | N/A |
| 10369835 | Fam13c /// Phyhipl                         | N/A | N/A |
| 10369842 | Bicc1                                      | N/A | N/A |
| 10369867 | Tfam                                       | N/A | N/A |
| 10369877 | Ube2d1                                     | N/A | N/A |
| 10369885 | Cisd1                                      | N/A | N/A |
| 10369890 | ---                                        | N/A | N/A |
| 10369892 | ---                                        | N/A | N/A |
| 10369894 | 1700049L16Rik                              | N/A | N/A |
| 10369898 | ---                                        | N/A | N/A |
| 10369909 | ---                                        | N/A | N/A |
| 10369911 | 1110038D17Rik                              | N/A | N/A |
| 10369920 | A1646023                                   | N/A | N/A |
| 10369927 | ---                                        | N/A | N/A |
| 10369929 | ---                                        | N/A | N/A |
| 10369932 | Susd2                                      | N/A | N/A |
| 10369948 | Cabin1                                     | N/A | N/A |
| 10369989 | Ddt                                        | N/A | N/A |
| 10369993 | Gstt3                                      | N/A | N/A |
| 10370013 | Gstt2                                      | N/A | N/A |
| 10370021 | Mif                                        | N/A | N/A |
| 10370025 | Smarcb1                                    | N/A | N/A |
| 10370037 | Mmp11                                      | N/A | N/A |
| 10370070 | ---                                        | N/A | N/A |
| 10370072 | Prmt2 /// Mir678                           | N/A | N/A |
| 10370174 | A130042E20Rik /// 2610028H24Rik /// Mcm3ap | N/A | N/A |
| 10370242 | Pcbp3                                      | N/A | N/A |
| 10370303 | Adarb1                                     | N/A | N/A |
| 10370334 | Lrrc3                                      | N/A | N/A |
| 10370376 | Pfkl                                       | N/A | N/A |
| 10370413 | D10Jhu81e                                  | N/A | N/A |
| 10370422 | Pwp2                                       | N/A | N/A |
| 10370446 | Trappc10                                   | N/A | N/A |
| 10370483 | Rrp1                                       | N/A | N/A |
| 10370497 | Pdxk                                       | N/A | N/A |
| 10370508 | Gm9978                                     | N/A | N/A |
| 10370544 | 2610008E11Rik                              | N/A | N/A |
| 10370552 | Ppap2c                                     | N/A | N/A |
| 10370559 | Mier2                                      | N/A | N/A |
| 10370584 | C2cd4c                                     | N/A | N/A |
| 10370632 | Rnf126                                     | N/A | N/A |
| 10370651 | BC005764                                   | N/A | N/A |
| 10370681 | C030046I01Rik                              | N/A | N/A |
| 10370754 | Dos                                        | N/A | N/A |
| 10370777 | 2310011J03Rik                              | N/A | N/A |
| 10370818 | Mex3d                                      | N/A | N/A |
| 10370824 | Mbd3                                       | N/A | N/A |
| 10370833 | Uqcr11                                     | N/A | N/A |
| 10370892 | Rexo1                                      | N/A | N/A |
| 10370911 | Kif16                                      | N/A | N/A |
| 10370914 | Fam108a                                    | N/A | N/A |
| 10370920 | Btbd2                                      | N/A | N/A |
| 10370931 | Mknk2                                      | N/A | N/A |
| 10370946 | Mobkl2a                                    | N/A | N/A |
| 10370950 | Ap3d1                                      | N/A | N/A |
| 10370983 | Plekhj1 /// Sf3a2                          | N/A | N/A |
| 10370999 | Lingo3                                     | N/A | N/A |
| 10371002 | Lsm7                                       | N/A | N/A |
| 10371006 | Timm13                                     | N/A | N/A |
| 10371037 | Slc39a3                                    | N/A | N/A |
| 10371041 | Sgta                                       | N/A | N/A |
| 10371067 | Pias4                                      | N/A | N/A |
| 10371080 | Dapk3 /// 4930442H23Rik                    | N/A | N/A |
| 10371092 | Atcay                                      | N/A | N/A |
| 10371107 | Mrpl54                                     | N/A | N/A |
| 10371141 | Hmg20b                                     | N/A | N/A |
| 10371159 | Fzr1                                       | N/A | N/A |
| 10371176 | Nfic                                       | N/A | N/A |
| 10371188 | Celf5                                      | N/A | N/A |
| 10371201 | Ncln                                       | N/A | N/A |
| 10371217 | S1pr4                                      | N/A | N/A |
| 10371230 | Gna11                                      | N/A | N/A |
| 10371256 | Sirt6                                      | N/A | N/A |
| 10371271 | Zfp781                                     | N/A | N/A |

|          |                          |     |     |
|----------|--------------------------|-----|-----|
| 10371277 | B230315N10Rik            | N/A | N/A |
| 10371286 | ---                      | N/A | N/A |
| 10371293 | 1190007107Rik            | N/A | N/A |
| 10371296 | Git8d2 /// Tdg           | N/A | N/A |
| 10371307 | Nfyb                     | N/A | N/A |
| 10371319 | Gm10773                  | N/A | N/A |
| 10371332 | Aldh1l2                  | N/A | N/A |
| 10371356 | Appl2                    | N/A | N/A |
| 10371379 | Nuak1                    | N/A | N/A |
| 10371387 | Ckap4                    | N/A | N/A |
| 10371396 | Mterfd3                  | N/A | N/A |
| 10371400 | Cry1                     | N/A | N/A |
| 10371420 | Prdm4                    | N/A | N/A |
| 10371432 | D10Wsu52e                | N/A | N/A |
| 10371464 | Fbxo7                    | N/A | N/A |
| 10371466 | Syn3                     | N/A | N/A |
| 10371482 | Hsp90b1                  | N/A | N/A |
| 10371578 | Ascl1                    | N/A | N/A |
| 10371589 | Gm10763                  | N/A | N/A |
| 10371607 | Dram1                    | N/A | N/A |
| 10371616 | Chpt1                    | N/A | N/A |
| 10371660 | ---                      | N/A | N/A |
| 10371670 | ---                      | N/A | N/A |
| 10371676 | Utp20                    | N/A | N/A |
| 10371770 | Gas2l3                   | N/A | N/A |
| 10371784 | Nr1h4                    | N/A | N/A |
| 10371811 | Scyl2                    | N/A | N/A |
| 10371842 | Uhrf1bp1l                | N/A | N/A |
| 10371844 | ---                      | N/A | N/A |
| 10371877 | Slc25a3                  | N/A | N/A |
| 10371888 | Tmpo                     | N/A | N/A |
| 10371904 | 1110012L19Rik            | N/A | N/A |
| 10371916 | 4930485B16Rik            | N/A | N/A |
| 10371942 | 4930485B16Rik            | N/A | N/A |
| 10371959 | Cdk17 /// Elk3           | N/A | N/A |
| 10371970 | Amdhd1                   | N/A | N/A |
| 10372001 | ---                      | N/A | N/A |
| 10372003 | Mir331                   | N/A | N/A |
| 10372005 | Vezt                     | N/A | N/A |
| 10372021 | ---                      | N/A | N/A |
| 10372028 | Plxnc1                   | N/A | N/A |
| 10372060 | Cradd                    | N/A | N/A |
| 10372078 | Mrpl42                   | N/A | N/A |
| 10372082 | Nudt4                    | N/A | N/A |
| 10372091 | 3200002M19Rik /// Gm6843 | N/A | N/A |
| 10372094 | ---                      | N/A | N/A |
| 10372102 | LOC100504157             | N/A | N/A |
| 10372104 | ---                      | N/A | N/A |
| 10372106 | Gm10754 /// Epyc         | N/A | N/A |
| 10372108 | C030005K15Rik            | N/A | N/A |
| 10372110 | Phxr2                    | N/A | N/A |
| 10372114 | Gm8671                   | N/A | N/A |
| 10372121 | Tmtc3                    | N/A | N/A |
| 10372130 | 4930430F08Rik /// Cep290 | N/A | N/A |
| 10372139 | Nts                      | N/A | N/A |
| 10372151 | Lrriq1                   | N/A | N/A |
| 10372177 | Tmtc2                    | N/A | N/A |
| 10372204 | ---                      | N/A | N/A |
| 10372208 | Accs3                    | N/A | N/A |
| 10372324 | Syt1                     | N/A | N/A |
| 10372338 | Gm5136                   | N/A | N/A |
| 10372342 | Nav3                     | N/A | N/A |
| 10372383 | Zdhhc17                  | N/A | N/A |
| 10372385 | Zdhhc17                  | N/A | N/A |
| 10372417 | Atxn7l3b                 | N/A | N/A |
| 10372421 | Trhde                    | N/A | N/A |
| 10372441 | ---                      | N/A | N/A |
| 10372457 | Tbc1d15                  | N/A | N/A |
| 10372478 | Rab21                    | N/A | N/A |
| 10372488 | Tmem19                   | N/A | N/A |
| 10372497 | Thap2                    | N/A | N/A |
| 10372503 | Lgr5                     | N/A | N/A |
| 10372534 | Cnot2                    | N/A | N/A |
| 10372583 | Rab3ip                   | N/A | N/A |
| 10372597 | ---                      | N/A | N/A |
| 10372600 | Cct2                     | N/A | N/A |
| 10372618 | Frs2                     | N/A | N/A |
| 10372629 | Yeats4                   | N/A | N/A |
| 10372648 | Lyz2                     | N/A | N/A |
| 10372656 | Cpsf6                    | N/A | N/A |
| 10372716 | Rap1b                    | N/A | N/A |
| 10372726 | Cdc5l                    | N/A | N/A |
| 10372728 | Cdc5l                    | N/A | N/A |
| 10372733 | Cdc5l                    | N/A | N/A |

|          |                       |     |     |
|----------|-----------------------|-----|-----|
| 10372735 | Cdc5l                 | N/A | N/A |
| 10372737 | Cdc5l                 | N/A | N/A |
| 10372739 | Cdc5l                 | N/A | N/A |
| 10372741 | Cdc5l                 | N/A | N/A |
| 10372743 | Cdc5l                 | N/A | N/A |
| 10372745 | Dyrk2                 | N/A | N/A |
| 10372748 | Gm10744               | N/A | N/A |
| 10372750 | Cand1                 | N/A | N/A |
| 10372805 | Gm10743               | N/A | N/A |
| 10372815 | Lemd3                 | N/A | N/A |
| 10372831 | Tbc1d30               | N/A | N/A |
| 10372844 | Rassf3                | N/A | N/A |
| 10372853 | Tbk1                  | N/A | N/A |
| 10372877 | Xpot                  | N/A | N/A |
| 10372889 | BC048403              | N/A | N/A |
| 10372891 | Srgap1                | N/A | N/A |
| 10372917 | Tmem5 /// Gm9079      | N/A | N/A |
| 10372926 | Mirlet7i              | N/A | N/A |
| 10372965 | Usp15                 | N/A | N/A |
| 10372988 | Slc16a7               | N/A | N/A |
| 10373000 | Xrcc6bp1              | N/A | N/A |
| 10373009 | Tsfm                  | N/A | N/A |
| 10373021 | March9                | N/A | N/A |
| 10373027 | Tspan31 /// Cdk4      | N/A | N/A |
| 10373036 | Os9                   | N/A | N/A |
| 10373052 | B4galnt1              | N/A | N/A |
| 10373093 | Dtx3                  | N/A | N/A |
| 10373101 | Pip4k2c               | N/A | N/A |
| 10373113 | Kif5a                 | N/A | N/A |
| 10373143 | Mbd6                  | N/A | N/A |
| 10373157 | Mars                  | N/A | N/A |
| 10373179 | Gli1                  | N/A | N/A |
| 10373192 | Inhbe                 | N/A | N/A |
| 10373197 | Inhbc                 | N/A | N/A |
| 10373202 | Shmt2                 | N/A | N/A |
| 10373223 | Lrp1                  | N/A | N/A |
| 10373313 | Nab2                  | N/A | N/A |
| 10373334 | Hsd17b6               | N/A | N/A |
| 10373340 | Rbms2                 | N/A | N/A |
| 10373355 | Spryd4                | N/A | N/A |
| 10373365 | Pan2                  | N/A | N/A |
| 10373367 | Coq10a                | N/A | N/A |
| 10373372 | Coq10a                | N/A | N/A |
| 10373388 | Obfc2b                | N/A | N/A |
| 10373396 | Myl6                  | N/A | N/A |
| 10373400 | Myl6b                 | N/A | N/A |
| 10373439 | Zc3h10                | N/A | N/A |
| 10373454 | Pa2g4                 | N/A | N/A |
| 10373467 | ErbB3                 | N/A | N/A |
| 10373498 | Rps26                 | N/A | N/A |
| 10373502 | Ikzf4                 | N/A | N/A |
| 10373515 | Suox                  | N/A | N/A |
| 10373519 | Rpl12                 | N/A | N/A |
| 10373521 | Rab5b                 | N/A | N/A |
| 10373542 | Dgka                  | N/A | N/A |
| 10373569 | Rpsa /// Rpsa-ps10    | N/A | N/A |
| 10373571 | 1110012D08Rik         | N/A | N/A |
| 10373577 | Ormdl2 /// Dnajc14    | N/A | N/A |
| 10373583 | Gdf11                 | N/A | N/A |
| 10373588 | Rdh5                  | N/A | N/A |
| 10373594 | Bloc1s1               | N/A | N/A |
| 10373600 | Mettl7b               | N/A | N/A |
| 10373606 | Olfir765              | N/A | N/A |
| 10373610 | Olfir767              | N/A | N/A |
| 10373612 | Olfir768              | N/A | N/A |
| 10373614 | Olfir769              | N/A | N/A |
| 10373616 | Olfir770              | N/A | N/A |
| 10373618 | Olfir771              | N/A | N/A |
| 10373622 | Olfir772 /// Olfir773 | N/A | N/A |
| 10373624 | Olfir777 /// Olfir800 | N/A | N/A |
| 10373626 | Olfir796              | N/A | N/A |
| 10373630 | Olfir801              | N/A | N/A |
| 10373632 | Olfir802              | N/A | N/A |
| 10373636 | Olfir805              | N/A | N/A |
| 10373640 | Olfir807              | N/A | N/A |
| 10373645 | Olfir811              | N/A | N/A |
| 10373647 | Olfir812              | N/A | N/A |
| 10373651 | ---                   | N/A | N/A |
| 10373657 | ---                   | N/A | N/A |
| 10373660 | Olfir818              | N/A | N/A |
| 10373662 | Olfir819 /// Olfir247 | N/A | N/A |
| 10373664 | Olfir819 /// Olfir247 | N/A | N/A |
| 10373666 | Olfir819 /// Olfir247 | N/A | N/A |
| 10373668 | Olfir823 /// Olfir824 | N/A | N/A |

|          |                       |     |     |
|----------|-----------------------|-----|-----|
| 10373670 | Olfr823 /// Olfr824   | N/A | N/A |
| 10373678 | Olfr827               | N/A | N/A |
| 10373684 | Vmn2r123              | N/A | N/A |
| 10373690 | ---                   | N/A | N/A |
| 10373692 | Vmn2r86 /// Vmn2r87   | N/A | N/A |
| 10373702 | Pisd-ps3 /// Pisd-ps1 | N/A | N/A |
| 10373709 | Eif4enif1             | N/A | N/A |
| 10373740 | Pik3ip1               | N/A | N/A |
| 10373778 | Morc2a                | N/A | N/A |
| 10373810 | Dusp18                | N/A | N/A |
| 10373814 | Pes1                  | N/A | N/A |
| 10373832 | ---                   | N/A | N/A |
| 10373834 | Sec144                | N/A | N/A |
| 10373861 | Rnf215                | N/A | N/A |
| 10373873 | Sf3a1                 | N/A | N/A |
| 10373890 | Tbc1d10a              | N/A | N/A |
| 10373902 | Gatsl3                | N/A | N/A |
| 10373924 | Ascc2                 | N/A | N/A |
| 10373944 | Zmat5                 | N/A | N/A |
| 10373950 | Nipsnap1              | N/A | N/A |
| 10373964 | Thoc5                 | N/A | N/A |
| 10373986 | Ap1b1 /// Nefh        | N/A | N/A |
| 10374035 | Xbp1                  | N/A | N/A |
| 10374068 | Dbnl                  | N/A | N/A |
| 10374083 | Aebp1                 | N/A | N/A |
| 10374115 | Nudcd3                | N/A | N/A |
| 10374117 | ---                   | N/A | N/A |
| 10374119 | Ogdh                  | N/A | N/A |
| 10374151 | Zmiz2                 | N/A | N/A |
| 10374175 | Ppia                  | N/A | N/A |
| 10374181 | ---                   | N/A | N/A |
| 10374183 | LOC280487             | N/A | N/A |
| 10374185 | Ccm2                  | N/A | N/A |
| 10374223 | Igfbp1                | N/A | N/A |
| 10374228 | Gm11992               | N/A | N/A |
| 10374313 | ---                   | N/A | N/A |
| 10374348 | ---                   | N/A | N/A |
| 10374350 | ---                   | N/A | N/A |
| 10374352 | LOC280487             | N/A | N/A |
| 10374354 | ---                   | N/A | N/A |
| 10374356 | Vstm2a                | N/A | N/A |
| 10374364 | Akt2                  | N/A | N/A |
| 10374366 | Egfr                  | N/A | N/A |
| 10374406 | Cnrip1 /// Plek       | N/A | N/A |
| 10374413 | ---                   | N/A | N/A |
| 10374415 | Ppp3r1                | N/A | N/A |
| 10374426 | Pno1                  | N/A | N/A |
| 10374430 | Wdr92                 | N/A | N/A |
| 10374442 | C1d                   | N/A | N/A |
| 10374448 | ---                   | N/A | N/A |
| 10374450 | ---                   | N/A | N/A |
| 10374453 | Glul                  | N/A | N/A |
| 10374455 | Spred2                | N/A | N/A |
| 10374464 | Spred2                | N/A | N/A |
| 10374466 | Rab1                  | N/A | N/A |
| 10374476 | Rps17 /// Gm12034     | N/A | N/A |
| 10374485 | Peli1                 | N/A | N/A |
| 10374529 | AV249152              | N/A | N/A |
| 10374553 | Tmem17                | N/A | N/A |
| 10374558 | ---                   | N/A | N/A |
| 10374560 | Zrsr1                 | N/A | N/A |
| 10374564 | Cct4                  | N/A | N/A |
| 10374590 | Xpo1                  | N/A | N/A |
| 10374621 | Usp34 /// Ahsa2       | N/A | N/A |
| 10374706 | Pus10                 | N/A | N/A |
| 10374727 | Bcl11a                | N/A | N/A |
| 10374744 | ---                   | N/A | N/A |
| 10374762 | Vrk2 /// Gm6899       | N/A | N/A |
| 10374767 | ---                   | N/A | N/A |
| 10374769 | ---                   | N/A | N/A |
| 10374771 | Mir216b               | N/A | N/A |
| 10374773 | Mir216a               | N/A | N/A |
| 10374775 | Mir217                | N/A | N/A |
| 10374777 | Efemp1                | N/A | N/A |
| 10374793 | Pnpt1                 | N/A | N/A |
| 10374821 | Smek2                 | N/A | N/A |
| 10374840 | ---                   | N/A | N/A |
| 10374842 | Ccdc88a               | N/A | N/A |
| 10374880 | Mtif2                 | N/A | N/A |
| 10374908 | Rtn4                  | N/A | N/A |
| 10374929 | 4931440F15Rik         | N/A | N/A |
| 10374934 | Psme4                 | N/A | N/A |
| 10374998 | Gpr75                 | N/A | N/A |
| 10375038 | Mpg /// Nprl3         | N/A | N/A |



|          |                                                         |     |     |
|----------|---------------------------------------------------------|-----|-----|
| 10375051 | Hba-a1 /// Hba-a2                                       | N/A | N/A |
| 10375058 | Hba-a1 /// Hba-a2                                       | N/A | N/A |
| 10375065 | Sh3pxd2b                                                | N/A | N/A |
| 10375079 | Ubtcd2                                                  | N/A | N/A |
| 10375103 | Fbxw11                                                  | N/A | N/A |
| 10375121 | C530030P08Rik                                           | N/A | N/A |
| 10375123 | C530030P08Rik                                           | N/A | N/A |
| 10375125 | Ssbp1                                                   | N/A | N/A |
| 10375127 | 1700072H12Rik                                           | N/A | N/A |
| 10375145 | Lcp2                                                    | N/A | N/A |
| 10375167 | Fam196b                                                 | N/A | N/A |
| 10375214 | Mir218-2                                                | N/A | N/A |
| 10375216 | Pank3                                                   | N/A | N/A |
| 10375225 | Mir103-1                                                | N/A | N/A |
| 10375227 | ---                                                     | N/A | N/A |
| 10375229 | ---                                                     | N/A | N/A |
| 10375232 | ---                                                     | N/A | N/A |
| 10375234 | Nudcd2                                                  | N/A | N/A |
| 10375240 | Hspd1                                                   | N/A | N/A |
| 10375242 | ---                                                     | N/A | N/A |
| 10375245 | Gabrb2                                                  | N/A | N/A |
| 10375259 | Gabrb2                                                  | N/A | N/A |
| 10375261 | Gabrb2                                                  | N/A | N/A |
| 10375290 | Slu7                                                    | N/A | N/A |
| 10375322 | 4933415A04Rik                                           | N/A | N/A |
| 10375324 | LOC280487                                               | N/A | N/A |
| 10375326 | Pwwp2a                                                  | N/A | N/A |
| 10375343 | Rnf145                                                  | N/A | N/A |
| 10375358 | Ebf1                                                    | N/A | N/A |
| 10375360 | Ebf1                                                    | N/A | N/A |
| 10375382 | Clint1                                                  | N/A | N/A |
| 10375432 | C03001905Rik /// Cyfip2                                 | N/A | N/A |
| 10375439 | Med7                                                    | N/A | N/A |
| 10375472 | Timd4                                                   | N/A | N/A |
| 10375483 | ---                                                     | N/A | N/A |
| 10375485 | ---                                                     | N/A | N/A |
| 10375487 | Gnb2l1                                                  | N/A | N/A |
| 10375497 | ---                                                     | N/A | N/A |
| 10375499 | Snord96a                                                | N/A | N/A |
| 10375501 | Snord95                                                 | N/A | N/A |
| 10375525 | Olf1395                                                 | N/A | N/A |
| 10375527 | Olf1394                                                 | N/A | N/A |
| 10375529 | Zfp62                                                   | N/A | N/A |
| 10375543 | Olf1393                                                 | N/A | N/A |
| 10375545 | Olf1392                                                 | N/A | N/A |
| 10375547 | Olf10                                                   | N/A | N/A |
| 10375549 | Olf1391                                                 | N/A | N/A |
| 10375551 | Olf1390                                                 | N/A | N/A |
| 10375557 | Olf1388                                                 | N/A | N/A |
| 10375559 | ---                                                     | N/A | N/A |
| 10375561 | Olf1387                                                 | N/A | N/A |
| 10375563 | Olf1393 /// Olf1392 /// Olf1386 /// Olf1385             | N/A | N/A |
| 10375565 | Olf1392                                                 | N/A | N/A |
| 10375570 | Olf1383                                                 | N/A | N/A |
| 10375574 | Olf1373 /// Olf1371 /// Olf1380 /// Olf1382 /// Olf1381 | N/A | N/A |
| 10375576 | Olf1373 /// Olf1371 /// Olf1380 /// Olf1382 /// Olf1381 | N/A | N/A |
| 10375634 | Mapk9                                                   | N/A | N/A |
| 10375667 | Rnf130                                                  | N/A | N/A |
| 10375677 | Mir340                                                  | N/A | N/A |
| 10375679 | Tbc1d9b                                                 | N/A | N/A |
| 10375704 | Sqstm1                                                  | N/A | N/A |
| 10375713 | Mgat4b                                                  | N/A | N/A |
| 10375730 | ---                                                     | N/A | N/A |
| 10375732 | Cby3                                                    | N/A | N/A |
| 10375735 | Hnrnp1                                                  | N/A | N/A |
| 10375787 | Olf1378                                                 | N/A | N/A |
| 10375791 | Olf1378 /// Olf151 /// Olf1351                          | N/A | N/A |
| 10375793 | Olf151                                                  | N/A | N/A |
| 10375795 | Olf154                                                  | N/A | N/A |
| 10375797 | Olf154                                                  | N/A | N/A |
| 10375799 | Zfp354a                                                 | N/A | N/A |
| 10375811 | ---                                                     | N/A | N/A |
| 10375815 | ---                                                     | N/A | N/A |
| 10375820 | Clk4                                                    | N/A | N/A |
| 10375864 | Agxt2l2 /// Hnrnpab                                     | N/A | N/A |
| 10375880 | Nhp2                                                    | N/A | N/A |
| 10375893 | Sar1b                                                   | N/A | N/A |
| 10375901 | ---                                                     | N/A | N/A |
| 10375903 | Cdkn2aipnl                                              | N/A | N/A |
| 10375909 | Cdkl3                                                   | N/A | N/A |
| 10375926 | Ppp2ca                                                  | N/A | N/A |
| 10375941 | Vdac1                                                   | N/A | N/A |
| 10375956 | Fstl4                                                   | N/A | N/A |
| 10375973 | Taf13                                                   | N/A | N/A |

|          |                            |     |     |
|----------|----------------------------|-----|-----|
| 10375980 | Aff4                       | N/A | N/A |
| 10376002 | ---                        | N/A | N/A |
| 10376007 | Shroom1                    | N/A | N/A |
| 10376017 | Ankrd43 /// Gm9945         | N/A | N/A |
| 10376021 | Sep08                      | N/A | N/A |
| 10376033 | Kif3a                      | N/A | N/A |
| 10376052 | ---                        | N/A | N/A |
| 10376060 | Irf1                       | N/A | N/A |
| 10376074 | P4ha2                      | N/A | N/A |
| 10376092 | ---                        | N/A | N/A |
| 10376142 | 3230401D17Rik              | N/A | N/A |
| 10376144 | Fnip1                      | N/A | N/A |
| 10376163 | Rapgef6                    | N/A | N/A |
| 10376201 | Gpx3                       | N/A | N/A |
| 10376208 | Gm2a                       | N/A | N/A |
| 10376216 | Slc36a1                    | N/A | N/A |
| 10376239 | Gm12238                    | N/A | N/A |
| 10376241 | Zic5                       | N/A | N/A |
| 10376245 | Gria1                      | N/A | N/A |
| 10376263 | Mfap3                      | N/A | N/A |
| 10376269 | Galnt10                    | N/A | N/A |
| 10376283 | ---                        | N/A | N/A |
| 10376285 | Sap30l                     | N/A | N/A |
| 10376292 | Larp1                      | N/A | N/A |
| 10376312 | Larp1                      | N/A | N/A |
| 10376314 | Cnot8                      | N/A | N/A |
| 10376324 | Gm12250                    | N/A | N/A |
| 10376326 | Igtp /// Irgm2             | N/A | N/A |
| 10376339 | Zfp692-ps                  | N/A | N/A |
| 10376358 | Sh3bp5l                    | N/A | N/A |
| 10376374 | ---                        | N/A | N/A |
| 10376392 | Olf325                     | N/A | N/A |
| 10376394 | Olf324                     | N/A | N/A |
| 10376404 | Olf320                     | N/A | N/A |
| 10376406 | Olf319                     | N/A | N/A |
| 10376408 | Olf316                     | N/A | N/A |
| 10376410 | Olf315                     | N/A | N/A |
| 10376412 | Olf314                     | N/A | N/A |
| 10376414 | Olf313                     | N/A | N/A |
| 10376416 | Olf312 /// Olf313          | N/A | N/A |
| 10376418 | Olf311                     | N/A | N/A |
| 10376420 | Gm12258                    | N/A | N/A |
| 10376425 | Gm12258                    | N/A | N/A |
| 10376427 | 2810021J22Rik              | N/A | N/A |
| 10376444 | Hist3h2bb-ps /// Hist3h2ba | N/A | N/A |
| 10376446 | Trim17 /// Hist3h2a        | N/A | N/A |
| 10376455 | Hist3h2a /// Trim17        | N/A | N/A |
| 10376461 | Trim11                     | N/A | N/A |
| 10376474 | Mrp155                     | N/A | N/A |
| 10376482 | 2310033P09Rik              | N/A | N/A |
| 10376496 | Jmjd4                      | N/A | N/A |
| 10376532 | Olf225                     | N/A | N/A |
| 10376534 | Mpr1p                      | N/A | N/A |
| 10376555 | Cops3                      | N/A | N/A |
| 10376557 | Nt5m                       | N/A | N/A |
| 10376564 | Med9                       | N/A | N/A |
| 10376577 | ---                        | N/A | N/A |
| 10376579 | Lrrc48                     | N/A | N/A |
| 10376596 | 4933439F18Rik              | N/A | N/A |
| 10376685 | Alkbh5                     | N/A | N/A |
| 10376715 | Smcr7                      | N/A | N/A |
| 10376721 | Smcr8                      | N/A | N/A |
| 10376726 | Dhrs7b                     | N/A | N/A |
| 10376733 | Map2k3                     | N/A | N/A |
| 10376839 | Ttc19                      | N/A | N/A |
| 10376864 | Ubb /// Gm1821             | N/A | N/A |
| 10376885 | Snord49b                   | N/A | N/A |
| 10376887 | Snord49a                   | N/A | N/A |
| 10376897 | ---                        | N/A | N/A |
| 10376929 | Fam18b                     | N/A | N/A |
| 10376950 | Pmp22                      | N/A | N/A |
| 10376956 | Hs3st3a1                   | N/A | N/A |
| 10376986 | AU040829                   | N/A | N/A |
| 10376998 | Pirt                       | N/A | N/A |
| 10377010 | Scp1                       | N/A | N/A |
| 10377215 | Gas7                       | N/A | N/A |
| 10377253 | ---                        | N/A | N/A |
| 10377255 | Stx8                       | N/A | N/A |
| 10377308 | Mfsd6l                     | N/A | N/A |
| 10377319 | Myh10                      | N/A | N/A |
| 10377380 | 1500010J02Rik              | N/A | N/A |
| 10377416 | 2310047M10Rik              | N/A | N/A |
| 10377418 | Tmem107                    | N/A | N/A |
| 10377429 | Snord118                   | N/A | N/A |

|          |                           |     |     |
|----------|---------------------------|-----|-----|
| 10377431 | Vamp2                     | N/A | N/A |
| 10377508 | Trappc1                   | N/A | N/A |
| 10377534 | A030009H04Rik             | N/A | N/A |
| 10377537 | Chd3                      | N/A | N/A |
| 10377541 | Lsmd1 /// Tmem88          | N/A | N/A |
| 10377547 | Kdm6b                     | N/A | N/A |
| 10377550 | Trp53                     | N/A | N/A |
| 10377560 | Sat2                      | N/A | N/A |
| 10377569 | Fxr2                      | N/A | N/A |
| 10377593 | Zbtb4                     | N/A | N/A |
| 10377603 | Tmem102 /// G630025P09Rik | N/A | N/A |
| 10377605 | 1810027O10Rik             | N/A | N/A |
| 10377681 | Dullard /// Rai12         | N/A | N/A |
| 10377695 | Phf23                     | N/A | N/A |
| 10377751 | Asgr1                     | N/A | N/A |
| 10377763 | Asgr2                     | N/A | N/A |
| 10377802 | Mir195                    | N/A | N/A |
| 10377822 | Med11                     | N/A | N/A |
| 10377841 | Tm4sf5                    | N/A | N/A |
| 10377847 | Gltpd2                    | N/A | N/A |
| 10377889 | Mink1                     | N/A | N/A |
| 10377927 | Rnf167                    | N/A | N/A |
| 10377953 | Kif1c                     | N/A | N/A |
| 10377982 | Kif1c                     | N/A | N/A |
| 10377984 | Zfp3                      | N/A | N/A |
| 10377987 | Rabep1                    | N/A | N/A |
| 10378013 | Rpain                     | N/A | N/A |
| 10378024 | Mis12                     | N/A | N/A |
| 10378038 | Wscd1                     | N/A | N/A |
| 10378059 | Txndc17                   | N/A | N/A |
| 10378065 | Med31 /// 4930563E22Rik   | N/A | N/A |
| 10378068 | Xaf1                      | N/A | N/A |
| 10378082 | Ggt6                      | N/A | N/A |
| 10378088 | Mybbp1a                   | N/A | N/A |
| 10378114 | Ube2g1                    | N/A | N/A |
| 10378126 | Ankfy1                    | N/A | N/A |
| 10378154 | Zzef1                     | N/A | N/A |
| 10378214 | ---                       | N/A | N/A |
| 10378253 | Camkk1                    | N/A | N/A |
| 10378271 | 1200014J11Rik             | N/A | N/A |
| 10378334 | Tax1bp3                   | N/A | N/A |
| 10378341 | Shpk                      | N/A | N/A |
| 10378385 | Syata22 /// Olfr20        | N/A | N/A |
| 10378395 | Olfr20                    | N/A | N/A |
| 10378397 | Olfr376                   | N/A | N/A |
| 10378399 | Olfr384                   | N/A | N/A |
| 10378401 | ---                       | N/A | N/A |
| 10378407 | Olfr390                   | N/A | N/A |
| 10378415 | ---                       | N/A | N/A |
| 10378427 | Olfr401                   | N/A | N/A |
| 10378429 | Olfr402                   | N/A | N/A |
| 10378432 | Olfr403 /// Olfr43        | N/A | N/A |
| 10378434 | Olfr59 /// Olfr406-ps     | N/A | N/A |
| 10378436 | Olfr59                    | N/A | N/A |
| 10378438 | ---                       | N/A | N/A |
| 10378443 | Olfr412                   | N/A | N/A |
| 10378445 | E130309D14Rik             | N/A | N/A |
| 10378453 | 1300001I01Rik             | N/A | N/A |
| 10378482 | Mett10d                   | N/A | N/A |
| 10378497 | Mnt                       | N/A | N/A |
| 10378508 | Tsr1 /// Srr              | N/A | N/A |
| 10378523 | Smg6                      | N/A | N/A |
| 10378547 | Mir132                    | N/A | N/A |
| 10378568 | Mir22 /// 2210403K04Rik   | N/A | N/A |
| 10378570 | ---                       | N/A | N/A |
| 10378572 | Tlcd2                     | N/A | N/A |
| 10378579 | Prpf8                     | N/A | N/A |
| 10378668 | Pitpna                    | N/A | N/A |
| 10378681 | Inpp5k                    | N/A | N/A |
| 10378732 | Crk                       | N/A | N/A |
| 10378739 | Ywhae                     | N/A | N/A |
| 10378749 | 1700016K19Rik             | N/A | N/A |
| 10378763 | Gemin4                    | N/A | N/A |
| 10378774 | Timm22                    | N/A | N/A |
| 10378781 | ---                       | N/A | N/A |
| 10378783 | Rpl36 /// Gm13611         | N/A | N/A |
| 10378785 | Bhlha9                    | N/A | N/A |
| 10378833 | Ssh2                      | N/A | N/A |
| 10378848 | Hsp90aa1                  | N/A | N/A |
| 10378857 | Coro6                     | N/A | N/A |
| 10378870 | Git1                      | N/A | N/A |
| 10378964 | Sez6                      | N/A | N/A |
| 10378988 | Phf12                     | N/A | N/A |
| 10379006 | Dhrs13                    | N/A | N/A |

|          |                                         |     |     |
|----------|-----------------------------------------|-----|-----|
| 10379013 | Flot2                                   | N/A | N/A |
| 10379028 | Mir451                                  | N/A | N/A |
| 10379030 | BC017647                                | N/A | N/A |
| 10379034 | Tlcd1                                   | N/A | N/A |
| 10379060 | Proca1                                  | N/A | N/A |
| 10379068 | Sdf2 /// Supt6h                         | N/A | N/A |
| 10379075 | 2610507B11Rik                           | N/A | N/A |
| 10379117 | BC030499                                | N/A | N/A |
| 10379153 | Aldoc                                   | N/A | N/A |
| 10379163 | Pigs                                    | N/A | N/A |
| 10379184 | Slc46a1                                 | N/A | N/A |
| 10379190 | Vtn                                     | N/A | N/A |
| 10379200 | Sebox                                   | N/A | N/A |
| 10379204 | Poldip2                                 | N/A | N/A |
| 10379215 | Ift20                                   | N/A | N/A |
| 10379260 | Ksr1                                    | N/A | N/A |
| 10379262 | Nf1                                     | N/A | N/A |
| 10379321 | Rab11fip4                               | N/A | N/A |
| 10379338 | ---                                     | N/A | N/A |
| 10379340 | Mir193                                  | N/A | N/A |
| 10379342 | Mir365-2                                | N/A | N/A |
| 10379344 | Gm10387                                 | N/A | N/A |
| 10379346 | Suz12                                   | N/A | N/A |
| 10379363 | Atad5                                   | N/A | N/A |
| 10379387 | ---                                     | N/A | N/A |
| 10379389 | Adap2                                   | N/A | N/A |
| 10379401 | Rnf135                                  | N/A | N/A |
| 10379410 | Rhot1                                   | N/A | N/A |
| 10379436 | Rhbdl3                                  | N/A | N/A |
| 10379445 | Zfp207                                  | N/A | N/A |
| 10379467 | Psm11                                   | N/A | N/A |
| 10379482 | Cdk5r1                                  | N/A | N/A |
| 10379489 | Tmem98                                  | N/A | N/A |
| 10379505 | ---                                     | N/A | N/A |
| 10379518 | Ccl7                                    | N/A | N/A |
| 10379543 | Tmem132e                                | N/A | N/A |
| 10379557 | Gm11426                                 | N/A | N/A |
| 10379560 | Zfp830                                  | N/A | N/A |
| 10379564 | Lig3 /// Rffl                           | N/A | N/A |
| 10379627 | ---                                     | N/A | N/A |
| 10379630 | Sifn2                                   | N/A | N/A |
| 10379646 | Sifn3                                   | N/A | N/A |
| 10379652 | Snord7 /// Al450353                     | N/A | N/A |
| 10379654 | Ap2b1                                   | N/A | N/A |
| 10379689 | Taf15                                   | N/A | N/A |
| 10379727 | Gm11428                                 | N/A | N/A |
| 10379736 | 1100001G20Rik                           | N/A | N/A |
| 10379740 | Heatr6                                  | N/A | N/A |
| 10379795 | Synrg                                   | N/A | N/A |
| 10379836 | Mrm1                                    | N/A | N/A |
| 10379838 | Gm10374                                 | N/A | N/A |
| 10379866 | Car4                                    | N/A | N/A |
| 10379875 | Rpl13                                   | N/A | N/A |
| 10379889 | Appbp2 /// D630032N06Rik                | N/A | N/A |
| 10379953 | 4632419I22Rik                           | N/A | N/A |
| 10379957 | Rnft1                                   | N/A | N/A |
| 10379981 | Pthr2                                   | N/A | N/A |
| 10379987 | ---                                     | N/A | N/A |
| 10379989 | Fam33a                                  | N/A | N/A |
| 10379998 | Trim37                                  | N/A | N/A |
| 10380059 | Rnu3b4 /// Rnu3b2 /// Rnu3b1 /// Rnu3b3 | N/A | N/A |
| 10380061 | Rnu3b4 /// Rnu3b2 /// Rnu3b1 /// Rnu3b3 | N/A | N/A |
| 10380063 | Rnu3b4 /// Rnu3b2 /// Rnu3b1 /// Rnu3b3 | N/A | N/A |
| 10380065 | Rnu3b4 /// Rnu3b2 /// Rnu3b1 /// Rnu3b3 | N/A | N/A |
| 10380109 | Hsf5                                    | N/A | N/A |
| 10380116 | Rnf43                                   | N/A | N/A |
| 10380129 | Supt4h1 /// Gm3258                      | N/A | N/A |
| 10380135 | Mir142                                  | N/A | N/A |
| 10380210 | Srsf1                                   | N/A | N/A |
| 10380219 | Vezf1                                   | N/A | N/A |
| 10380226 | Cuedc1                                  | N/A | N/A |
| 10380238 | Mrps23                                  | N/A | N/A |
| 10380244 | 1700106J16Rik                           | N/A | N/A |
| 10380248 | Gm15698                                 | N/A | N/A |
| 10380250 | 2210409E12Rik /// Gm10367               | N/A | N/A |
| 10380252 | Coil                                    | N/A | N/A |
| 10380260 | Trim25                                  | N/A | N/A |
| 10380289 | Mmd                                     | N/A | N/A |
| 10380297 | Cox11 /// Tom11                         | N/A | N/A |
| 10380303 | Car10                                   | N/A | N/A |
| 10380318 | ---                                     | N/A | N/A |
| 10380341 | Spag9                                   | N/A | N/A |
| 10380381 | Tob1                                    | N/A | N/A |
| 10380384 | Ankrd40                                 | N/A | N/A |

|          |                                              |     |     |
|----------|----------------------------------------------|-----|-----|
| 10380403 | Lrrc59                                       | N/A | N/A |
| 10380411 | Mrpl27                                       | N/A | N/A |
| 10380415 | ---                                          | N/A | N/A |
| 10380417 | ---                                          | N/A | N/A |
| 10380472 | ---                                          | N/A | N/A |
| 10380474 | Hils1                                        | N/A | N/A |
| 10380477 | Ppp1r9b                                      | N/A | N/A |
| 10380489 | Samd14                                       | N/A | N/A |
| 10380514 | Fam117a                                      | N/A | N/A |
| 10380524 | Slc35b1                                      | N/A | N/A |
| 10380534 | Spop                                         | N/A | N/A |
| 10380549 | ---                                          | N/A | N/A |
| 10380551 | Phb                                          | N/A | N/A |
| 10380558 | B130006D01Rik                                | N/A | N/A |
| 10380560 | Zfp652                                       | N/A | N/A |
| 10380579 | ---                                          | N/A | N/A |
| 10380620 | Mir196a-1                                    | N/A | N/A |
| 10380634 | Hoxb7                                        | N/A | N/A |
| 10380646 | Mir10a                                       | N/A | N/A |
| 10380670 | Rpl17 /// Gm10268 /// Rpl17-ps3              | N/A | N/A |
| 10380699 | Copz2                                        | N/A | N/A |
| 10380710 | Mir152                                       | N/A | N/A |
| 10380719 | Sp6                                          | N/A | N/A |
| 10380739 | Osbpl7                                       | N/A | N/A |
| 10380751 | Mrpl45                                       | N/A | N/A |
| 10380761 | Socs7                                        | N/A | N/A |
| 10380773 | Arhgap23                                     | N/A | N/A |
| 10380793 | Mllt6                                        | N/A | N/A |
| 10380815 | Psmb3                                        | N/A | N/A |
| 10380819 | Cwc25 /// Z810474C18Rik                      | N/A | N/A |
| 10380821 | Atp5l                                        | N/A | N/A |
| 10380830 | B230217C12Rik                                | N/A | N/A |
| 10380840 | Cdk12                                        | N/A | N/A |
| 10380859 | Cdk12                                        | N/A | N/A |
| 10380862 | Ppp1r1b                                      | N/A | N/A |
| 10380871 | Stard3                                       | N/A | N/A |
| 10380927 | Grb7                                         | N/A | N/A |
| 10380954 | Gm12                                         | N/A | N/A |
| 10380986 | Psmd3                                        | N/A | N/A |
| 10381006 | Thra /// Nr1d1                               | N/A | N/A |
| 10381018 | Msl1                                         | N/A | N/A |
| 10381049 | Rapgef1                                      | N/A | N/A |
| 10381063 | Wipf2                                        | N/A | N/A |
| 10381082 | Rara                                         | N/A | N/A |
| 10381096 | Igfbp4                                       | N/A | N/A |
| 10381101 | Gm11559                                      | N/A | N/A |
| 10381103 | Krtap9-1 /// Gm11567 /// Gm11559 /// Gm11568 | N/A | N/A |
| 10381105 | Gm11567                                      | N/A | N/A |
| 10381107 | Krtap31-1                                    | N/A | N/A |
| 10381109 | Gm11565                                      | N/A | N/A |
| 10381111 | ---                                          | N/A | N/A |
| 10381115 | Eif1                                         | N/A | N/A |
| 10381118 | Gast                                         | N/A | N/A |
| 10381122 | Fkbp10 /// Nt5c3l                            | N/A | N/A |
| 10381133 | Klhl10                                       | N/A | N/A |
| 10381154 | Cnp                                          | N/A | N/A |
| 10381170 | Hspb9                                        | N/A | N/A |
| 10381172 | Stat5a                                       | N/A | N/A |
| 10381187 | Atp6v0a1                                     | N/A | N/A |
| 10381211 | Naglu                                        | N/A | N/A |
| 10381226 | Coasy                                        | N/A | N/A |
| 10381238 | Mlx                                          | N/A | N/A |
| 10381250 | Tubg1                                        | N/A | N/A |
| 10381260 | Tubg2                                        | N/A | N/A |
| 10381272 | Cntnap1                                      | N/A | N/A |
| 10381304 | Vps25                                        | N/A | N/A |
| 10381379 | ---                                          | N/A | N/A |
| 10381381 | ---                                          | N/A | N/A |
| 10381383 | ---                                          | N/A | N/A |
| 10381385 | ---                                          | N/A | N/A |
| 10381387 | G6pc                                         | N/A | N/A |
| 10381395 | Rundc1                                       | N/A | N/A |
| 10381402 | Rpl27                                        | N/A | N/A |
| 10381408 | Ifi35                                        | N/A | N/A |
| 10381416 | Rnd2                                         | N/A | N/A |
| 10381419 | Nbr1                                         | N/A | N/A |
| 10381445 | Tmem106a                                     | N/A | N/A |
| 10381458 | Rnu2                                         | N/A | N/A |
| 10381460 | Rnu2                                         | N/A | N/A |
| 10381462 | Rdm1                                         | N/A | N/A |
| 10381470 | Rnu2                                         | N/A | N/A |
| 10381472 | Rnu2                                         | N/A | N/A |
| 10381474 | Arl4d                                        | N/A | N/A |
| 10381477 | Dhx8                                         | N/A | N/A |

|          |                         |     |     |
|----------|-------------------------|-----|-----|
| 10381502 | ---                     | N/A | N/A |
| 10381526 | Ppih                    | N/A | N/A |
| 10381528 | Nags                    | N/A | N/A |
| 10381567 | Tmub2                   | N/A | N/A |
| 10381574 | Rundc3a                 | N/A | N/A |
| 10381588 | Grn                     | N/A | N/A |
| 10381601 | Mdk                     | N/A | N/A |
| 10381617 | ---                     | N/A | N/A |
| 10381647 | ---                     | N/A | N/A |
| 10381649 | Higd1b                  | N/A | N/A |
| 10381664 | Kif18b                  | N/A | N/A |
| 10381666 | Dcakd                   | N/A | N/A |
| 10381668 | Nmt1                    | N/A | N/A |
| 10381681 | ---                     | N/A | N/A |
| 10381695 | ---                     | N/A | N/A |
| 10381697 | Hexim1                  | N/A | N/A |
| 10381702 | Hexim2                  | N/A | N/A |
| 10381736 | Rprml                   | N/A | N/A |
| 10381744 | Arf2                    | N/A | N/A |
| 10381776 | Mapt                    | N/A | N/A |
| 10381807 | Lin52 /// Gm7020        | N/A | N/A |
| 10381860 | Mettl2                  | N/A | N/A |
| 10381870 | Gm10842                 | N/A | N/A |
| 10381872 | Tlk2                    | N/A | N/A |
| 10381930 | ---                     | N/A | N/A |
| 10381934 | Tanc2                   | N/A | N/A |
| 10381939 | Tanc2                   | N/A | N/A |
| 10381960 | Cyb561 /// Gm9910       | N/A | N/A |
| 10382010 | Dcaf7                   | N/A | N/A |
| 10382022 | Taco1                   | N/A | N/A |
| 10382028 | Map3k3                  | N/A | N/A |
| 10382047 | Gm10840                 | N/A | N/A |
| 10382049 | Ddx42                   | N/A | N/A |
| 10382069 | Psmc5                   | N/A | N/A |
| 10382104 | Snord104                | N/A | N/A |
| 10382106 | Gm885                   | N/A | N/A |
| 10382115 | Ccdc45                  | N/A | N/A |
| 10382136 | 1810010H24Rik           | N/A | N/A |
| 10382139 | Psm12                   | N/A | N/A |
| 10382152 | Helz                    | N/A | N/A |
| 10382189 | Apoh                    | N/A | N/A |
| 10382198 | ---                     | N/A | N/A |
| 10382200 | Ccdc46                  | N/A | N/A |
| 10382228 | Axin2                   | N/A | N/A |
| 10382243 | Gna13                   | N/A | N/A |
| 10382257 | Amz2                    | N/A | N/A |
| 10382284 | Prkar1a                 | N/A | N/A |
| 10382316 | Kcnj16                  | N/A | N/A |
| 10382328 | Sox9                    | N/A | N/A |
| 10382336 | ---                     | N/A | N/A |
| 10382339 | Gm16487                 | N/A | N/A |
| 10382341 | Sstr2                   | N/A | N/A |
| 10382360 | D11Wsu47e               | N/A | N/A |
| 10382367 | ---                     | N/A | N/A |
| 10382369 | Rpl38                   | N/A | N/A |
| 10382376 | Ttyh2                   | N/A | N/A |
| 10382425 | Gprc5c                  | N/A | N/A |
| 10382435 | Gprc5c                  | N/A | N/A |
| 10382462 | Slc9a3r1                | N/A | N/A |
| 10382470 | Tmem104                 | N/A | N/A |
| 10382502 | Cdr2l                   | N/A | N/A |
| 10382508 | Ict1                    | N/A | N/A |
| 10382516 | Kctd2                   | N/A | N/A |
| 10382538 | Armc7                   | N/A | N/A |
| 10382565 | Mrps7                   | N/A | N/A |
| 10382571 | ---                     | N/A | N/A |
| 10382573 | 2310067B10Rik           | N/A | N/A |
| 10382698 | 1110017F19Rik           | N/A | N/A |
| 10382701 | Sap30bp                 | N/A | N/A |
| 10382756 | Unk                     | N/A | N/A |
| 10382774 | 2310004N24Rik /// Acox1 | N/A | N/A |
| 10382795 | ---                     | N/A | N/A |
| 10382797 | Fam100b /// Gm7367      | N/A | N/A |
| 10382844 | Snord1b /// Snord1c     | N/A | N/A |
| 10382848 | 1110005A03Rik           | N/A | N/A |
| 10382852 | Mfsd11                  | N/A | N/A |
| 10382888 | ---                     | N/A | N/A |
| 10382912 | Sep 09                  | N/A | N/A |
| 10382932 | 2900041M22Rik           | N/A | N/A |
| 10382935 | Tnrc6c                  | N/A | N/A |
| 10382980 | Syng2                   | N/A | N/A |
| 10382985 | Afmid /// Tk1           | N/A | N/A |
| 10383010 | Socs3                   | N/A | N/A |
| 10383012 | Pgs1                    | N/A | N/A |

|          |                        |     |     |
|----------|------------------------|-----|-----|
| 10383023 | Gm10099                | N/A | N/A |
| 10383025 | C1qtnf1                | N/A | N/A |
| 10383088 | Gaa                    | N/A | N/A |
| 10383133 | Slc26a11               | N/A | N/A |
| 10383152 | Rnf213                 | N/A | N/A |
| 10383168 | Rnf213                 | N/A | N/A |
| 10383192 | Rnf213                 | N/A | N/A |
| 10383194 | Rnf213                 | N/A | N/A |
| 10383196 | Rnf213                 | N/A | N/A |
| 10383198 | Rnf213                 | N/A | N/A |
| 10383200 | Rnf213                 | N/A | N/A |
| 10383202 | Rnf213                 | N/A | N/A |
| 10383204 | Rnf213                 | N/A | N/A |
| 10383206 | Rnf213                 | N/A | N/A |
| 10383208 | Rnf213                 | N/A | N/A |
| 10383210 | Rnf213                 | N/A | N/A |
| 10383212 | Rnf213                 | N/A | N/A |
| 10383214 | Rnf213                 | N/A | N/A |
| 10383233 | Rnf213                 | N/A | N/A |
| 10383245 | Rptor                  | N/A | N/A |
| 10383289 | Baiap2                 | N/A | N/A |
| 10383309 | Slc38a10               | N/A | N/A |
| 10383311 | Gm9734                 | N/A | N/A |
| 10383342 | 0610009L18Rik          | N/A | N/A |
| 10383351 | Gm9981                 | N/A | N/A |
| 10383358 | ---                    | N/A | N/A |
| 10383360 | Ccdc137                | N/A | N/A |
| 10383365 | Hgs                    | N/A | N/A |
| 10383389 | Mrpl12                 | N/A | N/A |
| 10383395 | Slc25a10               | N/A | N/A |
| 10383409 | Gcgr                   | N/A | N/A |
| 10383429 | Npb                    | N/A | N/A |
| 10383434 | Notum                  | N/A | N/A |
| 10383436 | Aspscr1                | N/A | N/A |
| 10383453 | Lrrc45                 | N/A | N/A |
| 10383472 | Rac3                   | N/A | N/A |
| 10383479 | Hmga1-rs1 /// Hmga1    | N/A | N/A |
| 10383485 | Gps1                   | N/A | N/A |
| 10383514 | Uts2r                  | N/A | N/A |
| 10383518 | Hexdc                  | N/A | N/A |
| 10383532 | Narf                   | N/A | N/A |
| 10383545 | Foxk2                  | N/A | N/A |
| 10383556 | Fn3krp                 | N/A | N/A |
| 10383564 | Fn3k                   | N/A | N/A |
| 10383575 | Tbcd                   | N/A | N/A |
| 10383671 | Drg1                   | N/A | N/A |
| 10383681 | Patz1 /// Gm12592      | N/A | N/A |
| 10383684 | Limk2                  | N/A | N/A |
| 10383708 | Rnf185                 | N/A | N/A |
| 10383717 | Inpp5j                 | N/A | N/A |
| 10383731 | Smtn                   | N/A | N/A |
| 10383754 | ---                    | N/A | N/A |
| 10383756 | Ifitm2                 | N/A | N/A |
| 10383758 | Tug1                   | N/A | N/A |
| 10383763 | Gm10216                | N/A | N/A |
| 10383765 | ---                    | N/A | N/A |
| 10383767 | Osbp2                  | N/A | N/A |
| 10383791 | Slc35e4                | N/A | N/A |
| 10383799 | Tcn2                   | N/A | N/A |
| 10383810 | Pes1 /// 4930556J24Rik | N/A | N/A |
| 10383819 | Sec14l2                | N/A | N/A |
| 10383850 | ---                    | N/A | N/A |
| 10383867 | Mtmr3                  | N/A | N/A |
| 10383891 | Cabp7                  | N/A | N/A |
| 10383920 | Nefh                   | N/A | N/A |
| 10383930 | Gm10278                | N/A | N/A |
| 10383943 | Ewsr1                  | N/A | N/A |
| 10383982 | Znrf3                  | N/A | N/A |
| 10383991 | ---                    | N/A | N/A |
| 10383993 | Ccdc117                | N/A | N/A |
| 10383999 | Mrps24                 | N/A | N/A |
| 10384004 | Urgcp                  | N/A | N/A |
| 10384020 | Polm                   | N/A | N/A |
| 10384032 | Pold2                  | N/A | N/A |
| 10384051 | Gck                    | N/A | N/A |
| 10384064 | Camk2b                 | N/A | N/A |
| 10384092 | Nudcd3                 | N/A | N/A |
| 10384100 | Rps15a /// Gm11968     | N/A | N/A |
| 10384123 | Ddx56                  | N/A | N/A |
| 10384138 | Tmed4                  | N/A | N/A |
| 10384145 | H2afv                  | N/A | N/A |
| 10384150 | Purb                   | N/A | N/A |
| 10384152 | Purb                   | N/A | N/A |
| 10384179 | ---                    | N/A | N/A |

|          |                                         |     |     |
|----------|-----------------------------------------|-----|-----|
| 10384192 | Tbrg4                                   | N/A | N/A |
| 10384208 | ---                                     | N/A | N/A |
| 10384210 | ---                                     | N/A | N/A |
| 10384219 | ---                                     | N/A | N/A |
| 10384221 | ---                                     | N/A | N/A |
| 10384223 | Igfbp3                                  | N/A | N/A |
| 10384229 | ---                                     | N/A | N/A |
| 10384233 | Tns3                                    | N/A | N/A |
| 10384322 | Hus1                                    | N/A | N/A |
| 10384349 | Polr2c                                  | N/A | N/A |
| 10384363 | ---                                     | N/A | N/A |
| 10384370 | ---                                     | N/A | N/A |
| 10384378 | Ddc                                     | N/A | N/A |
| 10384396 | ---                                     | N/A | N/A |
| 10384398 | Grb10                                   | N/A | N/A |
| 10384423 | Cobl                                    | N/A | N/A |
| 10384448 | Sec61g                                  | N/A | N/A |
| 10384452 | Ublcp1                                  | N/A | N/A |
| 10384454 | ---                                     | N/A | N/A |
| 10384456 | ---                                     | N/A | N/A |
| 10384474 | Pno1                                    | N/A | N/A |
| 10384483 | ---                                     | N/A | N/A |
| 10384486 | Etaa1                                   | N/A | N/A |
| 10384493 | Gapdh                                   | N/A | N/A |
| 10384495 | ---                                     | N/A | N/A |
| 10384502 | ---                                     | N/A | N/A |
| 10384522 | Actr2                                   | N/A | N/A |
| 10384529 | Cep68                                   | N/A | N/A |
| 10384539 | Sic1a4                                  | N/A | N/A |
| 10384552 | Gapdh /// Gm2606 /// Gm2451 /// Gm10293 | N/A | N/A |
| 10384555 | Aftph                                   | N/A | N/A |
| 10384566 | ---                                     | N/A | N/A |
| 10384577 | ---                                     | N/A | N/A |
| 10384579 | Ugp2                                    | N/A | N/A |
| 10384603 | Mdh1                                    | N/A | N/A |
| 10384652 | ---                                     | N/A | N/A |
| 10384654 | ---                                     | N/A | N/A |
| 10384672 | Ahsa2 /// Usp34                         | N/A | N/A |
| 10384691 | 0610010F05Rik                           | N/A | N/A |
| 10384715 | LOC100134990                            | N/A | N/A |
| 10384717 | Pex13                                   | N/A | N/A |
| 10384725 | Rel                                     | N/A | N/A |
| 10384737 | Papolg                                  | N/A | N/A |
| 10384762 | A830031A19Rik                           | N/A | N/A |
| 10384766 | ---                                     | N/A | N/A |
| 10384768 | Gm10466                                 | N/A | N/A |
| 10384776 | 5730522E02Rik                           | N/A | N/A |
| 10384778 | ---                                     | N/A | N/A |
| 10384780 | Fanci                                   | N/A | N/A |
| 10384782 | Vrk2 /// Fanci                          | N/A | N/A |
| 10384795 | Cyb5d1 /// Gm6685                       | N/A | N/A |
| 10384797 | Ccdc85a                                 | N/A | N/A |
| 10384808 | Smek2 /// A630052C17Rik                 | N/A | N/A |
| 10384811 | Ccdc104                                 | N/A | N/A |
| 10384829 | Rps27a                                  | N/A | N/A |
| 10384838 | Eml6 /// Rtn4                           | N/A | N/A |
| 10384883 | 4931440F15Rik                           | N/A | N/A |
| 10384885 | Spnb2                                   | N/A | N/A |
| 10384936 | Acyp2                                   | N/A | N/A |
| 10384940 | Erlec1                                  | N/A | N/A |
| 10385004 | Nprl3                                   | N/A | N/A |
| 10385022 | Efcab9                                  | N/A | N/A |
| 10385032 | ---                                     | N/A | N/A |
| 10385034 | Rpsa                                    | N/A | N/A |
| 10385036 | Fgf18                                   | N/A | N/A |
| 10385043 | Npm1                                    | N/A | N/A |
| 10385052 | Ranbp17                                 | N/A | N/A |
| 10385081 | Anp32-ps                                | N/A | N/A |
| 10385096 | Kcni1                                   | N/A | N/A |
| 10385114 | Foxi1                                   | N/A | N/A |
| 10385153 | Ccdc99                                  | N/A | N/A |
| 10385155 | Fbl1                                    | N/A | N/A |
| 10385159 | Rars                                    | N/A | N/A |
| 10385175 | Wwc1                                    | N/A | N/A |
| 10385203 | Odz2                                    | N/A | N/A |
| 10385234 | ---                                     | N/A | N/A |
| 10385236 | Akr1b3 /// Gm6644                       | N/A | N/A |
| 10385239 | Mat2b                                   | N/A | N/A |
| 10385271 | Ccng1                                   | N/A | N/A |
| 10385281 | ---                                     | N/A | N/A |
| 10385283 | Gabrg2                                  | N/A | N/A |
| 10385297 | Gabra1                                  | N/A | N/A |
| 10385335 | ---                                     | N/A | N/A |
| 10385343 | Ttc1                                    | N/A | N/A |



|          |                                                         |     |     |
|----------|---------------------------------------------------------|-----|-----|
| 10385361 | Ublcp1                                                  | N/A | N/A |
| 10385365 | Lsm11                                                   | N/A | N/A |
| 10385375 | Thg1l                                                   | N/A | N/A |
| 10385382 | Sft2d1                                                  | N/A | N/A |
| 10385384 | Nipal4                                                  | N/A | N/A |
| 10385391 | Cyfp2                                                   | N/A | N/A |
| 10385455 | Timd2                                                   | N/A | N/A |
| 10385466 | Sgcd                                                    | N/A | N/A |
| 10385477 | ---                                                     | N/A | N/A |
| 10385484 | Ddx5                                                    | N/A | N/A |
| 10385486 | Trim41                                                  | N/A | N/A |
| 10385495 | Cdk2ap1                                                 | N/A | N/A |
| 10385500 | Irgm1                                                   | N/A | N/A |
| 10385511 | Psme2 /// Psme2b-ps                                     | N/A | N/A |
| 10385513 | 9930111J21Rik2 /// 9930111J21Rik1 /// Gm5431            | N/A | N/A |
| 10385518 | Tgtp1 /// Tgtp2 /// Gm12185                             | N/A | N/A |
| 10385523 | ---                                                     | N/A | N/A |
| 10385526 | 9930111J21Rik2 /// Gm5431 /// 9930111J21Rik1            | N/A | N/A |
| 10385540 | Olf1396                                                 | N/A | N/A |
| 10385555 | 1700024J04Rik                                           | N/A | N/A |
| 10385557 | Cnot6                                                   | N/A | N/A |
| 10385570 | Rpl30                                                   | N/A | N/A |
| 10385572 | Sqstm1                                                  | N/A | N/A |
| 10385591 | Maml1                                                   | N/A | N/A |
| 10385599 | Canx                                                    | N/A | N/A |
| 10385616 | Rufy1                                                   | N/A | N/A |
| 10385635 | Zfp354c                                                 | N/A | N/A |
| 10385647 | Zfp454                                                  | N/A | N/A |
| 10385656 | Zfp2                                                    | N/A | N/A |
| 10385665 | Zfp354b                                                 | N/A | N/A |
| 10385686 | Hnrnpab                                                 | N/A | N/A |
| 10385699 | Rmnd5b                                                  | N/A | N/A |
| 10385716 | 0610009B22Rik                                           | N/A | N/A |
| 10385719 | Sec24a                                                  | N/A | N/A |
| 10385747 | Phf15                                                   | N/A | N/A |
| 10385761 | Ube2b                                                   | N/A | N/A |
| 10385768 | Olf1373 /// Olf1371 /// Olf1380 /// Olf1382 /// Olf1381 | N/A | N/A |
| 10385774 | Olf1373 /// Olf1371 /// Olf1380 /// Olf1382 /// Olf1381 | N/A | N/A |
| 10385790 | Hspa4                                                   | N/A | N/A |
| 10385814 | Leap2                                                   | N/A | N/A |
| 10385818 | Uqcrq                                                   | N/A | N/A |
| 10385822 | Gm10447                                                 | N/A | N/A |
| 10385824 | Gm9837                                                  | N/A | N/A |
| 10385870 | Irf1                                                    | N/A | N/A |
| 10385893 | Slc22a4                                                 | N/A | N/A |
| 10385903 | Pdlim4                                                  | N/A | N/A |
| 10385926 | Cdc42se2                                                | N/A | N/A |
| 10385966 | Anxa6                                                   | N/A | N/A |
| 10385993 | Anxa6                                                   | N/A | N/A |
| 10386058 | Sparc                                                   | N/A | N/A |
| 10386070 | Atox1                                                   | N/A | N/A |
| 10386086 | Nmur2                                                   | N/A | N/A |
| 10386093 | Snord1b /// Snord1c                                     | N/A | N/A |
| 10386095 | Fam114a2                                                | N/A | N/A |
| 10386123 | A43005L14Rik                                            | N/A | N/A |
| 10386171 | Ndufs3                                                  | N/A | N/A |
| 10386178 | Olf130                                                  | N/A | N/A |
| 10386180 | ---                                                     | N/A | N/A |
| 10386185 | Olf1330 /// Olf1325 /// Olf1329-ps /// Olf1331          | N/A | N/A |
| 10386187 | Rpl24                                                   | N/A | N/A |
| 10386189 | Olf1330                                                 | N/A | N/A |
| 10386191 | Olf1330 /// Olf1325 /// Olf1329-ps /// Olf1328          | N/A | N/A |
| 10386193 | Olf1328                                                 | N/A | N/A |
| 10386207 | Olf1318                                                 | N/A | N/A |
| 10386209 | Olf1317                                                 | N/A | N/A |
| 10386219 | Zfp39                                                   | N/A | N/A |
| 10386230 | Rnf187                                                  | N/A | N/A |
| 10386236 | Hist3h2bb-ps                                            | N/A | N/A |
| 10386344 | A230051G13Rik                                           | N/A | N/A |
| 10386349 | 4930543L23Rik                                           | N/A | N/A |
| 10386359 | Guk1                                                    | N/A | N/A |
| 10386368 | 2310033P09Rik                                           | N/A | N/A |
| 10386370 | Arf1                                                    | N/A | N/A |
| 10386388 | Snap47                                                  | N/A | N/A |
| 10386394 | Zfp867                                                  | N/A | N/A |
| 10386400 | Arih2                                                   | N/A | N/A |
| 10386402 | Zkscan17                                                | N/A | N/A |
| 10386414 | Zkscan17                                                | N/A | N/A |
| 10386416 | Olf1222                                                 | N/A | N/A |
| 10386418 | ---                                                     | N/A | N/A |
| 10386423 | Pld6                                                    | N/A | N/A |
| 10386427 | Flcn                                                    | N/A | N/A |
| 10386442 | Cops3                                                   | N/A | N/A |
| 10386455 | Rasd1                                                   | N/A | N/A |

|          |                                 |     |     |
|----------|---------------------------------|-----|-----|
| 10386460 | Pemt                            | N/A | N/A |
| 10386470 | ---                             | N/A | N/A |
| 10386473 | Sreb1                           | N/A | N/A |
| 10386495 | Tom12                           | N/A | N/A |
| 10386518 | Atpaf2                          | N/A | N/A |
| 10386527 | ---                             | N/A | N/A |
| 10386529 | ---                             | N/A | N/A |
| 10386531 | ---                             | N/A | N/A |
| 10386533 | ---                             | N/A | N/A |
| 10386535 | ---                             | N/A | N/A |
| 10386537 | ---                             | N/A | N/A |
| 10386539 | ---                             | N/A | N/A |
| 10386541 | ---                             | N/A | N/A |
| 10386543 | Pabpc4                          | N/A | N/A |
| 10386546 | ---                             | N/A | N/A |
| 10386548 | Pabpc4                          | N/A | N/A |
| 10386551 | Flii                            | N/A | N/A |
| 10386628 | Gm16515                         | N/A | N/A |
| 10386633 | Gm16516                         | N/A | N/A |
| 10386636 | Usp22                           | N/A | N/A |
| 10386683 | Slc47a1                         | N/A | N/A |
| 10386703 | Gm12271                         | N/A | N/A |
| 10386705 | Rnf112                          | N/A | N/A |
| 10386723 | Mapk7                           | N/A | N/A |
| 10386741 | ---                             | N/A | N/A |
| 10386743 | Epn2                            | N/A | N/A |
| 10386756 | ---                             | N/A | N/A |
| 10386775 | Prpsap2                         | N/A | N/A |
| 10386789 | Ulk2                            | N/A | N/A |
| 10386821 | ---                             | N/A | N/A |
| 10386824 | Akap10                          | N/A | N/A |
| 10386844 | Zswim7                          | N/A | N/A |
| 10386850 | Ncor1                           | N/A | N/A |
| 10386909 | Cenpv                           | N/A | N/A |
| 10386916 | BC046404                        | N/A | N/A |
| 10386921 | Zfp287                          | N/A | N/A |
| 10386934 | Wsb2                            | N/A | N/A |
| 10386937 | Zfp286                          | N/A | N/A |
| 10386947 | Gm10291                         | N/A | N/A |
| 10386951 | Hs3st3b1                        | N/A | N/A |
| 10386955 | Cox10                           | N/A | N/A |
| 10386963 | Hs3st3a1 /// F930015N05Rik      | N/A | N/A |
| 10386965 | AU040829                        | N/A | N/A |
| 10386990 | ---                             | N/A | N/A |
| 10386992 | 1700086D15Rik                   | N/A | N/A |
| 10387014 | Map2k4                          | N/A | N/A |
| 10387100 | Shisa6                          | N/A | N/A |
| 10387180 | Ndel1                           | N/A | N/A |
| 10387194 | Odf4                            | N/A | N/A |
| 10387219 | Rangrf /// Slc25a35             | N/A | N/A |
| 10387251 | 2310047M10Rik /// 9330160F10Rik | N/A | N/A |
| 10387255 | Hes7                            | N/A | N/A |
| 10387316 | Chd3                            | N/A | N/A |
| 10387363 | Cyb5d1 /// Gm6685               | N/A | N/A |
| 10387368 | Tmem88 /// Lsmd1                | N/A | N/A |
| 10387372 | Kdm6b                           | N/A | N/A |
| 10387505 | Atp1b2                          | N/A | N/A |
| 10387514 | ---                             | N/A | N/A |
| 10387525 | Mpdu1                           | N/A | N/A |
| 10387536 | Cd68                            | N/A | N/A |
| 10387545 | Eif4a1                          | N/A | N/A |
| 10387557 | ---                             | N/A | N/A |
| 10387559 | Senp3                           | N/A | N/A |
| 10387588 | Polr2a                          | N/A | N/A |
| 10387648 | Tmem102 /// G630025P09Rik       | N/A | N/A |
| 10387659 | Nlgn2                           | N/A | N/A |
| 10387757 | Rai12                           | N/A | N/A |
| 10387768 | Dvl2 /// Acadvl                 | N/A | N/A |
| 10387871 | Pelp1                           | N/A | N/A |
| 10387903 | Vmo1                            | N/A | N/A |
| 10387907 | Pld2                            | N/A | N/A |
| 10387922 | Slc25a11                        | N/A | N/A |
| 10387932 | Pfn1                            | N/A | N/A |
| 10387936 | Spag7                           | N/A | N/A |
| 10387971 | Inca1                           | N/A | N/A |
| 10387983 | ---                             | N/A | N/A |
| 10387992 | Nup88                           | N/A | N/A |
| 10388010 | C1qbp                           | N/A | N/A |
| 10388018 | Dhx33                           | N/A | N/A |
| 10388033 | Derl2                           | N/A | N/A |
| 10388042 | 6330403K07Rik                   | N/A | N/A |
| 10388045 | ---                             | N/A | N/A |
| 10388109 | Pitpm3                          | N/A | N/A |
| 10388132 | 4933427D14Rik                   | N/A | N/A |

|          |                      |     |     |
|----------|----------------------|-----|-----|
| 10388154 | Med31                | N/A | N/A |
| 10388160 | Slc13a5              | N/A | N/A |
| 10388225 | ---                  | N/A | N/A |
| 10388227 | Cyb5d2               | N/A | N/A |
| 10388238 | Tmem93               | N/A | N/A |
| 10388241 | Ctns                 | N/A | N/A |
| 10388254 | Aspa                 | N/A | N/A |
| 10388265 | Olfr1                | N/A | N/A |
| 10388267 | Olfr378              | N/A | N/A |
| 10388272 | Olfr380              | N/A | N/A |
| 10388274 | Olfr381              | N/A | N/A |
| 10388276 | Olfr382              | N/A | N/A |
| 10388280 | Olfr385              | N/A | N/A |
| 10388284 | Olfr389              | N/A | N/A |
| 10388286 | Olfr391-ps           | N/A | N/A |
| 10388290 | Olfr393              | N/A | N/A |
| 10388292 | Olfr394              | N/A | N/A |
| 10388294 | Olfr395              | N/A | N/A |
| 10388298 | Olfr139              | N/A | N/A |
| 10388300 | Olfr399              | N/A | N/A |
| 10388304 | ---                  | N/A | N/A |
| 10388306 | Olfr410              | N/A | N/A |
| 10388308 | Olfr411              | N/A | N/A |
| 10388310 | Rap1gap2             | N/A | N/A |
| 10388337 | Pafah1b1             | N/A | N/A |
| 10388352 | Sgsm2                | N/A | N/A |
| 10388377 | Srr                  | N/A | N/A |
| 10388392 | Dph1 /// Ovca2       | N/A | N/A |
| 10388430 | Serpinf1             | N/A | N/A |
| 10388440 | Serpinf2             | N/A | N/A |
| 10388451 | Wdr81                | N/A | N/A |
| 10388461 | Cox7c /// Gm10012    | N/A | N/A |
| 10388465 | Doc2b                | N/A | N/A |
| 10388476 | Rph3al               | N/A | N/A |
| 10388488 | Fam101b              | N/A | N/A |
| 10388492 | Vps53                | N/A | N/A |
| 10388517 | Gemin4               | N/A | N/A |
| 10388520 | Glod4                | N/A | N/A |
| 10388532 | Nxn                  | N/A | N/A |
| 10388545 | Abr                  | N/A | N/A |
| 10388579 | Gosr1                | N/A | N/A |
| 10388591 | Cpd                  | N/A | N/A |
| 10388613 | Ccdc55               | N/A | N/A |
| 10388623 | Mir423               | N/A | N/A |
| 10388648 | Ankrd13b             | N/A | N/A |
| 10388679 | Abhd15 /// Gm10392   | N/A | N/A |
| 10388682 | Taok1                | N/A | N/A |
| 10388684 | Taok1                | N/A | N/A |
| 10388716 | Gm10277              | N/A | N/A |
| 10388718 | Pipox                | N/A | N/A |
| 10388732 | Dhrs13               | N/A | N/A |
| 10388734 | Eral1                | N/A | N/A |
| 10388745 | Lsm6 /// Gm10043     | N/A | N/A |
| 10388747 | BC017647 /// Gm10003 | N/A | N/A |
| 10388749 | Traf4                | N/A | N/A |
| 10388784 | Rpl23a               | N/A | N/A |
| 10388786 | Supt6h               | N/A | N/A |
| 10388847 | Sarm1                | N/A | N/A |
| 10388861 | Tmem199              | N/A | N/A |
| 10388869 | Tnfaip1              | N/A | N/A |
| 10388880 | Tmem97               | N/A | N/A |
| 10388884 | Nlk                  | N/A | N/A |
| 10388896 | ---                  | N/A | N/A |
| 10388902 | Lgals9               | N/A | N/A |
| 10388914 | Ksr1                 | N/A | N/A |
| 10388938 | Wsb1                 | N/A | N/A |
| 10388952 | Gm9964               | N/A | N/A |
| 10388954 | Omg                  | N/A | N/A |
| 10388958 | Evi2a /// Evi2b      | N/A | N/A |
| 10388971 | Utp6                 | N/A | N/A |
| 10388994 | Gm10386              | N/A | N/A |
| 10388996 | Crlf3                | N/A | N/A |
| 10389005 | 1110002N22Rik        | N/A | N/A |
| 10389010 | 5730455P16Rik        | N/A | N/A |
| 10389022 | Myo1d                | N/A | N/A |
| 10389025 | Myo1d                | N/A | N/A |
| 10389047 | Accn1                | N/A | N/A |
| 10389062 | 1700071K01Rik        | N/A | N/A |
| 10389087 | Rffl                 | N/A | N/A |
| 10389099 | Rad51l3              | N/A | N/A |
| 10389114 | Nle1                 | N/A | N/A |
| 10389127 | Unc45b               | N/A | N/A |
| 10389162 | Rpl12                | N/A | N/A |
| 10389164 | Pex12                | N/A | N/A |

|          |                            |     |     |
|----------|----------------------------|-----|-----|
| 10389170 | Gas2l2                     | N/A | N/A |
| 10389207 | Ccl5                       | N/A | N/A |
| 10389214 | Ccl9                       | N/A | N/A |
| 10389222 | Ccl6                       | N/A | N/A |
| 10389229 | Rp19                       | N/A | N/A |
| 10389238 | Dusp14                     | N/A | N/A |
| 10389245 | Tada2a                     | N/A | N/A |
| 10389261 | Gm11437                    | N/A | N/A |
| 10389269 | Aatf                       | N/A | N/A |
| 10389283 | Lhx1                       | N/A | N/A |
| 10389293 | Mrm1                       | N/A | N/A |
| 10389300 | Dhrs11                     | N/A | N/A |
| 10389308 | Ggnbp2                     | N/A | N/A |
| 10389339 | Usp32                      | N/A | N/A |
| 10389373 | Appbp2                     | N/A | N/A |
| 10389387 | Ppm1d                      | N/A | N/A |
| 10389389 | Gm10372                    | N/A | N/A |
| 10389421 | Ints2                      | N/A | N/A |
| 10389451 | Med13                      | N/A | N/A |
| 10389482 | ---                        | N/A | N/A |
| 10389484 | Rps6kb1                    | N/A | N/A |
| 10389505 | Gm9975                     | N/A | N/A |
| 10389522 | Rpl13a /// Rpl13a-ps1      | N/A | N/A |
| 10389524 | ---                        | N/A | N/A |
| 10389526 | Cltc                       | N/A | N/A |
| 10389561 | Dhx40                      | N/A | N/A |
| 10389590 | Gdpd1                      | N/A | N/A |
| 10389601 | 1200011M11Rik              | N/A | N/A |
| 10389617 | Ppm1e                      | N/A | N/A |
| 10389625 | ---                        | N/A | N/A |
| 10389668 | Olf462                     | N/A | N/A |
| 10389670 | Olf463                     | N/A | N/A |
| 10389672 | Olf464                     | N/A | N/A |
| 10389674 | Dynll2                     | N/A | N/A |
| 10389680 | Msi2                       | N/A | N/A |
| 10389699 | ---                        | N/A | N/A |
| 10389701 | Akap1                      | N/A | N/A |
| 10389717 | ---                        | N/A | N/A |
| 10389719 | Scpep1                     | N/A | N/A |
| 10389736 | 2210409E12Rik /// Gm10367  | N/A | N/A |
| 10389738 | Dgke                       | N/A | N/A |
| 10389752 | Nog                        | N/A | N/A |
| 10389754 | 4932411E22Rik              | N/A | N/A |
| 10389759 | Ankfn1                     | N/A | N/A |
| 10389775 | Pctp                       | N/A | N/A |
| 10389783 | Gm10276                    | N/A | N/A |
| 10389795 | Stxbp4                     | N/A | N/A |
| 10389797 | Stxbp4                     | N/A | N/A |
| 10389816 | Tom1l1 /// Cox11           | N/A | N/A |
| 10389858 | Dscaml1 /// Nme2           | N/A | N/A |
| 10389875 | Rpl27                      | N/A | N/A |
| 10389877 | Wfikn2                     | N/A | N/A |
| 10389882 | Luc7l3                     | N/A | N/A |
| 10389894 | Abcc3                      | N/A | N/A |
| 10390022 | Rsad1                      | N/A | N/A |
| 10390032 | Acsf2                      | N/A | N/A |
| 10390103 | Pdk2                       | N/A | N/A |
| 10390153 | Myst2                      | N/A | N/A |
| 10390184 | Gm9796                     | N/A | N/A |
| 10390209 | Igf2bp1                    | N/A | N/A |
| 10390227 | Ube2z                      | N/A | N/A |
| 10390237 | Atp5g1                     | N/A | N/A |
| 10390244 | ---                        | N/A | N/A |
| 10390252 | ---                        | N/A | N/A |
| 10390256 | Gm11529                    | N/A | N/A |
| 10390258 | Snx11                      | N/A | N/A |
| 10390269 | Gm11517                    | N/A | N/A |
| 10390271 | Nfe2l1                     | N/A | N/A |
| 10390283 | Cdk5rap3                   | N/A | N/A |
| 10390299 | Pnpo                       | N/A | N/A |
| 10390319 | Lrrc46                     | N/A | N/A |
| 10390336 | Tbkbp1                     | N/A | N/A |
| 10390381 | Npepps                     | N/A | N/A |
| 10390426 | 4933428G20Rik /// Arhgap23 | N/A | N/A |
| 10390430 | Scin1                      | N/A | N/A |
| 10390454 | E130012A19Rik              | N/A | N/A |
| 10390473 | Pip4k2b                    | N/A | N/A |
| 10390502 | Rpl23                      | N/A | N/A |
| 10390505 | Snora21                    | N/A | N/A |
| 10390574 | Fbxl20                     | N/A | N/A |
| 10390595 | Med1                       | N/A | N/A |
| 10390635 | 1810046J19Rik              | N/A | N/A |
| 10390653 | Med24                      | N/A | N/A |
| 10390691 | Nr1d1 /// Thra             | N/A | N/A |

|          |                                                           |     |     |
|----------|-----------------------------------------------------------|-----|-----|
| 10390705 | Gjd3                                                      | N/A | N/A |
| 10390746 | ---                                                       | N/A | N/A |
| 10390763 | Ccr7                                                      | N/A | N/A |
| 10390780 | Krt222                                                    | N/A | N/A |
| 10390831 | Krt10                                                     | N/A | N/A |
| 10390895 | Krtap3-1                                                  | N/A | N/A |
| 10390897 | Krtap1-5                                                  | N/A | N/A |
| 10390907 | Krtap1-3                                                  | N/A | N/A |
| 10390909 | Krtap9-3                                                  | N/A | N/A |
| 10390911 | Gm11562 /// Gm11938 /// Krtap2-4                          | N/A | N/A |
| 10390913 | Gm11562 /// Gm11938 /// Krtap2-4                          | N/A | N/A |
| 10390915 | Gm11562 /// Gm11938 /// Krtap2-4                          | N/A | N/A |
| 10390917 | Gm11562 /// Gm11938 /// Krtap2-4                          | N/A | N/A |
| 10390919 | Krtap4-1                                                  | N/A | N/A |
| 10390934 | Krtap4-8 /// Krtap4-6 /// Gm11564 /// Gm11563 /// Gm11595 | N/A | N/A |
| 10390939 | Gm11569 /// Gm11554 /// Krtap4-13                         | N/A | N/A |
| 10390945 | Gm11569 /// Gm11554 /// Krtap4-13                         | N/A | N/A |
| 10390954 | ---                                                       | N/A | N/A |
| 10390956 | Krtap4-16                                                 | N/A | N/A |
| 10390961 | Krtap17-1                                                 | N/A | N/A |
| 10391084 | Hap1                                                      | N/A | N/A |
| 10391100 | Atp5g1                                                    | N/A | N/A |
| 10391103 | Jup                                                       | N/A | N/A |
| 10391119 | 1110036003Rik                                             | N/A | N/A |
| 10391130 | Nt5c3l                                                    | N/A | N/A |
| 10391143 | Klh11                                                     | N/A | N/A |
| 10391146 | Acly                                                      | N/A | N/A |
| 10391178 | Dnajc7                                                    | N/A | N/A |
| 10391221 | Kat2a                                                     | N/A | N/A |
| 10391242 | Rab5c                                                     | N/A | N/A |
| 10391277 | Ghdc                                                      | N/A | N/A |
| 10391286 | Stat5b                                                    | N/A | N/A |
| 10391301 | Stat3                                                     | N/A | N/A |
| 10391407 | Ccdc56                                                    | N/A | N/A |
| 10391410 | Becn1 /// Cntd1                                           | N/A | N/A |
| 10391454 | Vat1                                                      | N/A | N/A |
| 10391488 | Rnu2                                                      | N/A | N/A |
| 10391513 | Dusp3                                                     | N/A | N/A |
| 10391518 | Mpp3                                                      | N/A | N/A |
| 10391555 | Ppy                                                       | N/A | N/A |
| 10391567 | Tmem101                                                   | N/A | N/A |
| 10391572 | Lsm12                                                     | N/A | N/A |
| 10391577 | Hdac5                                                     | N/A | N/A |
| 10391610 | ---                                                       | N/A | N/A |
| 10391625 | Ubtf                                                      | N/A | N/A |
| 10391732 | Gpatch8                                                   | N/A | N/A |
| 10391742 | Gpatch8                                                   | N/A | N/A |
| 10391744 | Gpatch8                                                   | N/A | N/A |
| 10391746 | Gpatch8                                                   | N/A | N/A |
| 10391750 | Gpatch8                                                   | N/A | N/A |
| 10391755 | Ccdc43                                                    | N/A | N/A |
| 10391768 | Eftud2                                                    | N/A | N/A |
| 10391798 | Gfap                                                      | N/A | N/A |
| 10391828 | C1ql1                                                     | N/A | N/A |
| 10391914 | Sh3d20 /// Arhgap27                                       | N/A | N/A |
| 10391957 | Wnt9b                                                     | N/A | N/A |
| 10391963 | Nsf                                                       | N/A | N/A |
| 10391985 | Taf1d                                                     | N/A | N/A |
| 10391987 | Gm10844                                                   | N/A | N/A |
| 10391990 | 170008111Rik                                              | N/A | N/A |
| 10392010 | 170008111Rik                                              | N/A | N/A |
| 10392012 | Cdc27                                                     | N/A | N/A |
| 10392033 | ---                                                       | N/A | N/A |
| 10392056 | Cyb561                                                    | N/A | N/A |
| 10392070 | Strada                                                    | N/A | N/A |
| 10392087 | Ccdc47                                                    | N/A | N/A |
| 10392096 | ---                                                       | N/A | N/A |
| 10392098 | Ftsj3                                                     | N/A | N/A |
| 10392177 | Icam2                                                     | N/A | N/A |
| 10392183 | Ern1                                                      | N/A | N/A |
| 10392207 | Tex2                                                      | N/A | N/A |
| 10392251 | Ddx5                                                      | N/A | N/A |
| 10392259 | Smurf2                                                    | N/A | N/A |
| 10392261 | Smurf2                                                    | N/A | N/A |
| 10392284 | Kpna2                                                     | N/A | N/A |
| 10392300 | Bptf                                                      | N/A | N/A |
| 10392318 | Bptf                                                      | N/A | N/A |
| 10392328 | Nol11                                                     | N/A | N/A |
| 10392347 | Pitpnc1                                                   | N/A | N/A |
| 10392369 | Cacng4                                                    | N/A | N/A |
| 10392374 | Cacng5                                                    | N/A | N/A |
| 10392388 | Prkca                                                     | N/A | N/A |
| 10392410 | Gm10838                                                   | N/A | N/A |
| 10392413 | ---                                                       | N/A | N/A |

|          |                                                                                                              |     |     |
|----------|--------------------------------------------------------------------------------------------------------------|-----|-----|
| 10392415 | Rgs9                                                                                                         | N/A | N/A |
| 10392437 | Gm11696 /// Gna13                                                                                            | N/A | N/A |
| 10392449 | Wipi1                                                                                                        | N/A | N/A |
| 10392464 | Fam20a                                                                                                       | N/A | N/A |
| 10392484 | Abca8b                                                                                                       | N/A | N/A |
| 10392522 | Abca8a                                                                                                       | N/A | N/A |
| 10392601 | Abca6                                                                                                        | N/A | N/A |
| 10392642 | Abca5                                                                                                        | N/A | N/A |
| 10392683 | Gm10836                                                                                                      | N/A | N/A |
| 10392685 | BC006965                                                                                                     | N/A | N/A |
| 10392699 | ---                                                                                                          | N/A | N/A |
| 10392701 | Slc39a11                                                                                                     | N/A | N/A |
| 10392721 | Cpsf4l                                                                                                       | N/A | N/A |
| 10392735 | Cdc42ep4                                                                                                     | N/A | N/A |
| 10392787 | 4932435O22Rik                                                                                                | N/A | N/A |
| 10392791 | Btbd17                                                                                                       | N/A | N/A |
| 10392825 | Clm3 /// Gm11711                                                                                             | N/A | N/A |
| 10392834 | Clm3 /// Gm11711                                                                                             | N/A | N/A |
| 10392856 | Nat9                                                                                                         | N/A | N/A |
| 10392881 | Fdxr                                                                                                         | N/A | N/A |
| 10392894 | Fads6                                                                                                        | N/A | N/A |
| 10392910 | C630004H02Rik                                                                                                | N/A | N/A |
| 10392930 | Atp5h /// Gm4953 /// Gm5048                                                                                  | N/A | N/A |
| 10392936 | Nt5c                                                                                                         | N/A | N/A |
| 10392943 | Hn1                                                                                                          | N/A | N/A |
| 10392947 | Sumo2 /// Mir684-1 /// Mir684-2                                                                              | N/A | N/A |
| 10392953 | Gga3                                                                                                         | N/A | N/A |
| 10392970 | Mif4gd                                                                                                       | N/A | N/A |
| 10392983 | Slc25a19                                                                                                     | N/A | N/A |
| 10392996 | Rpl21 /// Gm6813 /// Gm9104 /// Rpl21-ps4 /// Rpl21-ps7 /// Gm16416 /// Rpl21-ps12 /// Rpl21-ps10 /// Gm8054 | N/A | N/A |
| 10393045 | B230344G16Rik /// Itgb4                                                                                      | N/A | N/A |
| 10393058 | H3f3b                                                                                                        | N/A | N/A |
| 10393098 | Wbp2                                                                                                         | N/A | N/A |
| 10393125 | Mrp138                                                                                                       | N/A | N/A |
| 10393166 | St6galnac2 /// 1810032O08Rik                                                                                 | N/A | N/A |
| 10393177 | Acox1                                                                                                        | N/A | N/A |
| 10393222 | Srp68                                                                                                        | N/A | N/A |
| 10393239 | ---                                                                                                          | N/A | N/A |
| 10393241 | Exoc7                                                                                                        | N/A | N/A |
| 10393264 | ---                                                                                                          | N/A | N/A |
| 10393272 | Rnf157                                                                                                       | N/A | N/A |
| 10393309 | Prpsap1                                                                                                      | N/A | N/A |
| 10393320 | Ube2o                                                                                                        | N/A | N/A |
| 10393379 | Mxra7                                                                                                        | N/A | N/A |
| 10393395 | Srsf2                                                                                                        | N/A | N/A |
| 10393404 | LOC100505199                                                                                                 | N/A | N/A |
| 10393406 | ---                                                                                                          | N/A | N/A |
| 10393431 | Tk1                                                                                                          | N/A | N/A |
| 10393509 | Usp36                                                                                                        | N/A | N/A |
| 10393559 | Timp2                                                                                                        | N/A | N/A |
| 10393569 | Ddc8                                                                                                         | N/A | N/A |
| 10393573 | Lgals3bp                                                                                                     | N/A | N/A |
| 10393594 | D11Bwg0517e                                                                                                  | N/A | N/A |
| 10393642 | Eif4a3                                                                                                       | N/A | N/A |
| 10393662 | Nptx1                                                                                                        | N/A | N/A |
| 10393668 | Aatk                                                                                                         | N/A | N/A |
| 10393685 | Mir338                                                                                                       | N/A | N/A |
| 10393714 | 2410002I01Rik                                                                                                | N/A | N/A |
| 10393728 | Slc38a10                                                                                                     | N/A | N/A |
| 10393749 | 2810410L24Rik                                                                                                | N/A | N/A |
| 10393754 | Actg1                                                                                                        | N/A | N/A |
| 10393761 | 2310003H01Rik                                                                                                | N/A | N/A |
| 10393774 | Nploc4                                                                                                       | N/A | N/A |
| 10393801 | 1810049H13Rik                                                                                                | N/A | N/A |
| 10393814 | Fam195b                                                                                                      | N/A | N/A |
| 10393823 | P4hb                                                                                                         | N/A | N/A |
| 10393836 | Arhgdia                                                                                                      | N/A | N/A |
| 10393851 | Pcyt2                                                                                                        | N/A | N/A |
| 10393866 | Sirt7                                                                                                        | N/A | N/A |
| 10393877 | ---                                                                                                          | N/A | N/A |
| 10393879 | ---                                                                                                          | N/A | N/A |
| 10393917 | Stra13                                                                                                       | N/A | N/A |
| 10393926 | Dcxr                                                                                                         | N/A | N/A |
| 10393944 | Rfng                                                                                                         | N/A | N/A |
| 10393955 | Dus1l                                                                                                        | N/A | N/A |
| 10393970 | Fasn                                                                                                         | N/A | N/A |
| 10394040 | Csnk1d                                                                                                       | N/A | N/A |
| 10394080 | ---                                                                                                          | N/A | N/A |
| 10394093 | BC017643                                                                                                     | N/A | N/A |
| 10394102 | Wdr45l                                                                                                       | N/A | N/A |
| 10394119 | Zfp750                                                                                                       | N/A | N/A |
| 10394142 | Hmgb1                                                                                                        | N/A | N/A |
| 10394158 | Kif3c /// 1110002L01Rik                                                                                      | N/A | N/A |
| 10394173 | Asxl2                                                                                                        | N/A | N/A |

|          |                                         |     |     |
|----------|-----------------------------------------|-----|-----|
| 10394186 | Dtnb                                    | N/A | N/A |
| 10394209 | Dnmt3a                                  | N/A | N/A |
| 10394238 | ---                                     | N/A | N/A |
| 10394258 | Adcy3 /// Cenpo                         | N/A | N/A |
| 10394283 | 2410017P09Rik /// Cenpo                 | N/A | N/A |
| 10394286 | 2410017P09Rik                           | N/A | N/A |
| 10394288 | Itsn2                                   | N/A | N/A |
| 10394344 | Gm6682                                  | N/A | N/A |
| 10394353 | 0610009D07Rik                           | N/A | N/A |
| 10394366 | Atad2b                                  | N/A | N/A |
| 10394381 | Atad2b                                  | N/A | N/A |
| 10394389 | 2810032G03Rik                           | N/A | N/A |
| 10394392 | Nfyc                                    | N/A | N/A |
| 10394394 | Apob                                    | N/A | N/A |
| 10394429 | 1110057K04Rik                           | N/A | N/A |
| 10394448 | Pum2                                    | N/A | N/A |
| 10394471 | Sdc1                                    | N/A | N/A |
| 10394498 | Wdr35                                   | N/A | N/A |
| 10394527 | Ttc32                                   | N/A | N/A |
| 10394532 | Ube2f /// Gm5434                        | N/A | N/A |
| 10394538 | Acaca                                   | N/A | N/A |
| 10394555 | Rdh14                                   | N/A | N/A |
| 10394558 | Rpl29 /// Gm3550                        | N/A | N/A |
| 10394591 | Rpl15 /// Gm4294                        | N/A | N/A |
| 10394593 | Fam49a                                  | N/A | N/A |
| 10394609 | Rpl36 /// Gm13611 /// Gm5614 /// Gm5745 | N/A | N/A |
| 10394611 | Nbas                                    | N/A | N/A |
| 10394625 | Nbas                                    | N/A | N/A |
| 10394627 | Nbas                                    | N/A | N/A |
| 10394671 | Gm16497                                 | N/A | N/A |
| 10394674 | Socs2 /// Gm9847                        | N/A | N/A |
| 10394676 | ---                                     | N/A | N/A |
| 10394678 | ---                                     | N/A | N/A |
| 10394680 | ---                                     | N/A | N/A |
| 10394682 | ---                                     | N/A | N/A |
| 10394685 | Ntsr2                                   | N/A | N/A |
| 10394731 | ---                                     | N/A | N/A |
| 10394733 | Rps23                                   | N/A | N/A |
| 10394735 | Pdia6                                   | N/A | N/A |
| 10394749 | Nol10                                   | N/A | N/A |
| 10394770 | Odc1                                    | N/A | N/A |
| 10394776 | ---                                     | N/A | N/A |
| 10394778 | Hpcal1                                  | N/A | N/A |
| 10394789 | B430203G13Rik                           | N/A | N/A |
| 10394791 | ---                                     | N/A | N/A |
| 10394798 | ---                                     | N/A | N/A |
| 10394805 | 2410018L13Rik                           | N/A | N/A |
| 10394812 | ---                                     | N/A | N/A |
| 10394819 | ---                                     | N/A | N/A |
| 10394821 | ---                                     | N/A | N/A |
| 10394823 | ---                                     | N/A | N/A |
| 10394827 | ---                                     | N/A | N/A |
| 10394829 | ---                                     | N/A | N/A |
| 10394831 | Gm5784                                  | N/A | N/A |
| 10394833 | ---                                     | N/A | N/A |
| 10394837 | LOC100043371 /// 2410018L13Rik          | N/A | N/A |
| 10394843 | ---                                     | N/A | N/A |
| 10394846 | LOC100043371                            | N/A | N/A |
| 10394850 | ---                                     | N/A | N/A |
| 10394858 | ---                                     | N/A | N/A |
| 10394860 | B230354O11Rik                           | N/A | N/A |
| 10394892 | Cpsf3                                   | N/A | N/A |
| 10394912 | ---                                     | N/A | N/A |
| 10394922 | ---                                     | N/A | N/A |
| 10394926 | ---                                     | N/A | N/A |
| 10394934 | ---                                     | N/A | N/A |
| 10394936 | ---                                     | N/A | N/A |
| 10394938 | ---                                     | N/A | N/A |
| 10394940 | ---                                     | N/A | N/A |
| 10394942 | Taf1b                                   | N/A | N/A |
| 10394954 | Grhl1                                   | N/A | N/A |
| 10394978 | Rrm2                                    | N/A | N/A |
| 10394988 | ---                                     | N/A | N/A |
| 10394990 | Mboat2                                  | N/A | N/A |
| 10395005 | Kidins220                               | N/A | N/A |
| 10395049 | Rnaseh1                                 | N/A | N/A |
| 10395058 | Adi1                                    | N/A | N/A |
| 10395064 | Tssc1                                   | N/A | N/A |
| 10395074 | Myt1l                                   | N/A | N/A |
| 10395103 | Pxdn                                    | N/A | N/A |
| 10395129 | Tmem18                                  | N/A | N/A |
| 10395155 | Fam110c                                 | N/A | N/A |
| 10395198 | ---                                     | N/A | N/A |
| 10395225 | Gm10473                                 | N/A | N/A |

|          |                                         |     |     |
|----------|-----------------------------------------|-----|-----|
| 10395227 | Hbp1 /// Cog5                           | N/A | N/A |
| 10395250 | ---                                     | N/A | N/A |
| 10395252 | 2010109K11Rik                           | N/A | N/A |
| 10395257 | ---                                     | N/A | N/A |
| 10395259 | Nampt                                   | N/A | N/A |
| 10395273 | Gdap10                                  | N/A | N/A |
| 10395275 | LOC280487                               | N/A | N/A |
| 10395287 | Atxn711                                 | N/A | N/A |
| 10395312 | Twistnb                                 | N/A | N/A |
| 10395328 | Snx13                                   | N/A | N/A |
| 10395376 | Ankmy2                                  | N/A | N/A |
| 10395389 | Sostdc1                                 | N/A | N/A |
| 10395394 | Ispd                                    | N/A | N/A |
| 10395414 | Tmem195                                 | N/A | N/A |
| 10395428 | Dgkb                                    | N/A | N/A |
| 10395457 | Etv1                                    | N/A | N/A |
| 10395463 | lfrd1 /// Gm7008                        | N/A | N/A |
| 10395466 | Dock4                                   | N/A | N/A |
| 10395520 | lmp2l                                   | N/A | N/A |
| 10395534 | Gm2027                                  | N/A | N/A |
| 10395538 | Pnpla8                                  | N/A | N/A |
| 10395553 | Nrcam                                   | N/A | N/A |
| 10395594 | ---                                     | N/A | N/A |
| 10395596 | Foxg1 /// 3110039M20Rik                 | N/A | N/A |
| 10395604 | Gm9804                                  | N/A | N/A |
| 10395606 | Gm10468                                 | N/A | N/A |
| 10395608 | ---                                     | N/A | N/A |
| 10395610 | Gm9808                                  | N/A | N/A |
| 10395672 | Ap4s1                                   | N/A | N/A |
| 10395682 | Gm5785                                  | N/A | N/A |
| 10395684 | Nubpl                                   | N/A | N/A |
| 10395692 | Arhgap5                                 | N/A | N/A |
| 10395702 | Akap6                                   | N/A | N/A |
| 10395719 | Npas3                                   | N/A | N/A |
| 10395733 | Npas3                                   | N/A | N/A |
| 10395737 | Rpl21 /// Gm7555                        | N/A | N/A |
| 10395739 | Srp54c /// Srp54a /// Srp54b            | N/A | N/A |
| 10395788 | Srp54c /// Srp54a /// Srp54b            | N/A | N/A |
| 10395805 | Fam177a /// 1700047117Rik2              | N/A | N/A |
| 10395807 | 1110008L16Rik                           | N/A | N/A |
| 10395816 | Psmab6                                  | N/A | N/A |
| 10395825 | Aldoart2                                | N/A | N/A |
| 10395827 | Insm2                                   | N/A | N/A |
| 10395829 | Ralgapa1                                | N/A | N/A |
| 10395831 | Brms1l                                  | N/A | N/A |
| 10395845 | ---                                     | N/A | N/A |
| 10395847 | ---                                     | N/A | N/A |
| 10395908 | ---                                     | N/A | N/A |
| 10395910 | Pnn                                     | N/A | N/A |
| 10395922 | Rps2 /// Rps2-ps6 /// Gm5921 /// Gm6139 | N/A | N/A |
| 10395925 | Mia2                                    | N/A | N/A |
| 10395932 | Ctage5                                  | N/A | N/A |
| 10395953 | ---                                     | N/A | N/A |
| 10395961 | Lrfrn5                                  | N/A | N/A |
| 10395971 | ---                                     | N/A | N/A |
| 10395976 | Dnajb6                                  | N/A | N/A |
| 10395978 | Gm527                                   | N/A | N/A |
| 10395984 | Fam179b                                 | N/A | N/A |
| 10396008 | Prpf39 /// Fkbp3                        | N/A | N/A |
| 10396030 | Fancm                                   | N/A | N/A |
| 10396059 | Rpl17 /// Gm10268 /// Rpl17-ps3         | N/A | N/A |
| 10396064 | Txndc9                                  | N/A | N/A |
| 10396066 | ---                                     | N/A | N/A |
| 10396074 | Mgat2                                   | N/A | N/A |
| 10396076 | 1110034A24Rik /// 9330151L19Rik         | N/A | N/A |
| 10396094 | Klhdc2                                  | N/A | N/A |
| 10396108 | Arf6                                    | N/A | N/A |
| 10396110 | ---                                     | N/A | N/A |
| 10396112 | Atp5s                                   | N/A | N/A |
| 10396121 | 4930512B01Rik                           | N/A | N/A |
| 10396125 | Atl1                                    | N/A | N/A |
| 10396141 | ---                                     | N/A | N/A |
| 10396143 | Gm3086                                  | N/A | N/A |
| 10396146 | Nin /// Gm9997                          | N/A | N/A |
| 10396161 | Tmx1                                    | N/A | N/A |
| 10396170 | Frmf6                                   | N/A | N/A |
| 10396175 | Gm10457                                 | N/A | N/A |
| 10396177 | Actr10                                  | N/A | N/A |
| 10396193 | Psmab3                                  | N/A | N/A |
| 10396205 | Arid4a                                  | N/A | N/A |
| 10396270 | Dact1                                   | N/A | N/A |
| 10396278 | Daam1                                   | N/A | N/A |
| 10396306 | Jkamp                                   | N/A | N/A |
| 10396346 | 1810048J11Rik                           | N/A | N/A |



|          |                                          |     |     |
|----------|------------------------------------------|-----|-----|
| 10396358 | Ppm1a                                    | N/A | N/A |
| 10396367 | Six6                                     | N/A | N/A |
| 10396383 | Slc38a6                                  | N/A | N/A |
| 10396419 | ---                                      | N/A | N/A |
| 10396421 | Hif1a                                    | N/A | N/A |
| 10396442 | Snopc1                                   | N/A | N/A |
| 10396466 | 1700086L19Rik                            | N/A | N/A |
| 10396472 | Dbpht2                                   | N/A | N/A |
| 10396606 | Syne2                                    | N/A | N/A |
| 10396608 | Syne2                                    | N/A | N/A |
| 10396610 | Mthfd1                                   | N/A | N/A |
| 10396640 | Akap5                                    | N/A | N/A |
| 10396652 | Hspa2                                    | N/A | N/A |
| 10396656 | Gm70                                     | N/A | N/A |
| 10396669 | Gm10451                                  | N/A | N/A |
| 10396694 | Churc1                                   | N/A | N/A |
| 10396699 | Fntb                                     | N/A | N/A |
| 10396712 | Fut8                                     | N/A | N/A |
| 10396730 | ---                                      | N/A | N/A |
| 10396740 | Gphn                                     | N/A | N/A |
| 10396778 | Mpp5                                     | N/A | N/A |
| 10396795 | Eif2s1                                   | N/A | N/A |
| 10396867 | Exd2                                     | N/A | N/A |
| 10396877 | Galnt1                                   | N/A | N/A |
| 10396896 | Slc39a9                                  | N/A | N/A |
| 10396919 | 4933426M11Rik                            | N/A | N/A |
| 10396926 | Srsf5                                    | N/A | N/A |
| 10396936 | Smoc1                                    | N/A | N/A |
| 10396950 | ---                                      | N/A | N/A |
| 10396952 | Ttc9                                     | N/A | N/A |
| 10396956 | Pcnx                                     | N/A | N/A |
| 10397000 | ---                                      | N/A | N/A |
| 10397002 | Sipa1l1                                  | N/A | N/A |
| 10397054 | Dcaf4                                    | N/A | N/A |
| 10397068 | Rbm25                                    | N/A | N/A |
| 10397081 | Rbm25                                    | N/A | N/A |
| 10397083 | Rbm25                                    | N/A | N/A |
| 10397085 | Rbm25                                    | N/A | N/A |
| 10397094 | Psen1                                    | N/A | N/A |
| 10397143 | 2410016O06Rik                            | N/A | N/A |
| 10397145 | Acot2                                    | N/A | N/A |
| 10397172 | Acot6                                    | N/A | N/A |
| 10397189 | Ptgr2                                    | N/A | N/A |
| 10397201 | Zfp410                                   | N/A | N/A |
| 10397230 | 2900006K08Rik                            | N/A | N/A |
| 10397249 | Lin52 /// Gm7020                         | N/A | N/A |
| 10397267 | Isca2                                    | N/A | N/A |
| 10397275 | Ltbp2 /// D030025P21Rik                  | N/A | N/A |
| 10397281 | Yipm1                                    | N/A | N/A |
| 10397311 | Dlst                                     | N/A | N/A |
| 10397332 | Eif2b2                                   | N/A | N/A |
| 10397342 | Fam164c                                  | N/A | N/A |
| 10397416 | 1700019E19Rik                            | N/A | N/A |
| 10397428 | 1700020O03Rik                            | N/A | N/A |
| 10397450 | Vash1                                    | N/A | N/A |
| 10397476 | 2310044G17Rik                            | N/A | N/A |
| 10397482 | Tmem63c                                  | N/A | N/A |
| 10397507 | Gstz1 /// Pomt2                          | N/A | N/A |
| 10397518 | Ahsa1                                    | N/A | N/A |
| 10397528 | Rpl21                                    | N/A | N/A |
| 10397536 | ---                                      | N/A | N/A |
| 10397538 | ---                                      | N/A | N/A |
| 10397541 | Gm8300 /// Gm2022 /// Gm2056 /// Gm16368 | N/A | N/A |
| 10397543 | Eif1a /// Gm8300 /// Gm2022 /// Gm16368  | N/A | N/A |
| 10397555 | Gm8587                                   | N/A | N/A |
| 10397559 | ---                                      | N/A | N/A |
| 10397575 | Nrxn3                                    | N/A | N/A |
| 10397602 | ---                                      | N/A | N/A |
| 10397627 | ---                                      | N/A | N/A |
| 10397633 | Flrt2                                    | N/A | N/A |
| 10397639 | ---                                      | N/A | N/A |
| 10397642 | ---                                      | N/A | N/A |
| 10397645 | Gpr65                                    | N/A | N/A |
| 10397666 | Zc3h14                                   | N/A | N/A |
| 10397683 | Ttc8                                     | N/A | N/A |
| 10397699 | Rpl30                                    | N/A | N/A |
| 10397701 | ---                                      | N/A | N/A |
| 10397703 | 3300002A11Rik                            | N/A | N/A |
| 10397708 | ---                                      | N/A | N/A |
| 10397715 | ---                                      | N/A | N/A |
| 10397717 | ---                                      | N/A | N/A |
| 10397719 | Tdp1                                     | N/A | N/A |
| 10397741 | Psmc1                                    | N/A | N/A |
| 10397750 | ---                                      | N/A | N/A |

|          |                                   |     |     |
|----------|-----------------------------------|-----|-----|
| 10397752 | Calm1                             | N/A | N/A |
| 10397761 | Gm10432                           | N/A | N/A |
| 10397763 | 9030617003Rik                     | N/A | N/A |
| 10397780 | Ccdc88c                           | N/A | N/A |
| 10397784 | Smek1 /// D130020L05Rik           | N/A | N/A |
| 10397786 | Kif4b                             | N/A | N/A |
| 10397788 | Kif4b                             | N/A | N/A |
| 10397790 | ---                               | N/A | N/A |
| 10397818 | Cpsf2                             | N/A | N/A |
| 10397835 | Slc24a4                           | N/A | N/A |
| 10397866 | Golga5                            | N/A | N/A |
| 10397882 | Chga                              | N/A | N/A |
| 10397891 | D230037D09Rik                     | N/A | N/A |
| 10397895 | Ubr7                              | N/A | N/A |
| 10397912 | Unc79                             | N/A | N/A |
| 10397966 | Otub2                             | N/A | N/A |
| 10397975 | Ifi271l                           | N/A | N/A |
| 10397984 | Ppp4r4                            | N/A | N/A |
| 10398011 | Serpina4-ps1                      | N/A | N/A |
| 10398069 | Serpina3m                         | N/A | N/A |
| 10398075 | Serpina3n                         | N/A | N/A |
| 10398080 | Gm10000                           | N/A | N/A |
| 10398085 | Glr5                              | N/A | N/A |
| 10398095 | Tcl1b1                            | N/A | N/A |
| 10398130 | Ak7                               | N/A | N/A |
| 10398147 | Papola                            | N/A | N/A |
| 10398173 | Vrk1                              | N/A | N/A |
| 10398193 | 3110018I06Rik                     | N/A | N/A |
| 10398195 | Ccnk                              | N/A | N/A |
| 10398224 | Cyp46a1                           | N/A | N/A |
| 10398286 | Mir342                            | N/A | N/A |
| 10398288 | Yy1                               | N/A | N/A |
| 10398297 | Mir345                            | N/A | N/A |
| 10398299 | Slc25a47                          | N/A | N/A |
| 10398306 | Wdr25                             | N/A | N/A |
| 10398315 | ---                               | N/A | N/A |
| 10398319 | Dlk1                              | N/A | N/A |
| 10398326 | Meg3                              | N/A | N/A |
| 10398332 | Mir673                            | N/A | N/A |
| 10398334 | Mir337                            | N/A | N/A |
| 10398336 | Mir540                            | N/A | N/A |
| 10398338 | Mir665                            | N/A | N/A |
| 10398340 | Rtl1 /// Mir431                   | N/A | N/A |
| 10398342 | Rtl1 /// Mir433 /// 6430411K18Rik | N/A | N/A |
| 10398344 | Rtl1 /// Mir127                   | N/A | N/A |
| 10398346 | Rtl1 /// Mir434                   | N/A | N/A |
| 10398348 | Rtl1 /// Mir136                   | N/A | N/A |
| 10398350 | Mir341                            | N/A | N/A |
| 10398352 | Mir370                            | N/A | N/A |
| 10398354 | ---                               | N/A | N/A |
| 10398356 | ---                               | N/A | N/A |
| 10398358 | ---                               | N/A | N/A |
| 10398360 | ---                               | N/A | N/A |
| 10398362 | AF357355                          | N/A | N/A |
| 10398364 | ---                               | N/A | N/A |
| 10398366 | ---                               | N/A | N/A |
| 10398368 | ---                               | N/A | N/A |
| 10398370 | ---                               | N/A | N/A |
| 10398372 | ---                               | N/A | N/A |
| 10398374 | AF357341                          | N/A | N/A |
| 10398376 | ---                               | N/A | N/A |
| 10398378 | ---                               | N/A | N/A |
| 10398380 | ---                               | N/A | N/A |
| 10398382 | Mir379                            | N/A | N/A |
| 10398384 | Mir411                            | N/A | N/A |
| 10398386 | Mir299                            | N/A | N/A |
| 10398388 | Mir380                            | N/A | N/A |
| 10398390 | Mir323                            | N/A | N/A |
| 10398392 | Mir329                            | N/A | N/A |
| 10398394 | Mir494                            | N/A | N/A |
| 10398396 | Mir679                            | N/A | N/A |
| 10398398 | Mir666                            | N/A | N/A |
| 10398400 | Mir543                            | N/A | N/A |
| 10398402 | Mir495                            | N/A | N/A |
| 10398404 | Mir667                            | N/A | N/A |
| 10398406 | Mir376c                           | N/A | N/A |
| 10398408 | Mir376b                           | N/A | N/A |
| 10398412 | Mir300                            | N/A | N/A |
| 10398414 | Mir381                            | N/A | N/A |
| 10398416 | Mir487b                           | N/A | N/A |
| 10398418 | Mir539                            | N/A | N/A |
| 10398420 | Mir382                            | N/A | N/A |
| 10398422 | Mir134                            | N/A | N/A |
| 10398424 | Mir668                            | N/A | N/A |

|          |                                |     |     |
|----------|--------------------------------|-----|-----|
| 10398426 | Mir485                         | N/A | N/A |
| 10398428 | Mir154                         | N/A | N/A |
| 10398430 | Mir496                         | N/A | N/A |
| 10398434 | Mir541                         | N/A | N/A |
| 10398436 | Mir409                         | N/A | N/A |
| 10398438 | Mir412                         | N/A | N/A |
| 10398440 | Mir369                         | N/A | N/A |
| 10398442 | Mir410 /// Mirg                | N/A | N/A |
| 10398444 | ---                            | N/A | N/A |
| 10398451 | Rps25 /// Gm4963               | N/A | N/A |
| 10398453 | PPP2r5c                        | N/A | N/A |
| 10398455 | PPP2r5c                        | N/A | N/A |
| 10398459 | PPP2r5c                        | N/A | N/A |
| 10398461 | PPP2r5c                        | N/A | N/A |
| 10398483 | Dync1h1                        | N/A | N/A |
| 10398578 | Tecpr2                         | N/A | N/A |
| 10398599 | Rps19 /// Rps19-ps3 /// Gm6636 | N/A | N/A |
| 10398601 | Rcor1                          | N/A | N/A |
| 10398615 | Gm10158                        | N/A | N/A |
| 10398678 | Eif5                           | N/A | N/A |
| 10398693 | Snora28                        | N/A | N/A |
| 10398695 | Mark3                          | N/A | N/A |
| 10398717 | Trmt61a                        | N/A | N/A |
| 10398721 | 2810002N01Rik                  | N/A | N/A |
| 10398727 | Klc1                           | N/A | N/A |
| 10398751 | Zfyve21                        | N/A | N/A |
| 10398795 | Aspg                           | N/A | N/A |
| 10398859 | Adssl1                         | N/A | N/A |
| 10398874 | Siva1                          | N/A | N/A |
| 10398881 | Zbtb42                         | N/A | N/A |
| 10398885 | AW555464                       | N/A | N/A |
| 10398929 | Btbd6                          | N/A | N/A |
| 10398934 | Brf1                           | N/A | N/A |
| 10398972 | Mta1                           | N/A | N/A |
| 10399005 | Crip1                          | N/A | N/A |
| 10399027 | Adam6a                         | N/A | N/A |
| 10399029 | ---                            | N/A | N/A |
| 10399034 | ---                            | N/A | N/A |
| 10399036 | Uevld                          | N/A | N/A |
| 10399038 | Zfp386                         | N/A | N/A |
| 10399046 | Vipr2                          | N/A | N/A |
| 10399061 | Esyt2                          | N/A | N/A |
| 10399121 | Ptprn2                         | N/A | N/A |
| 10399146 | Mir153                         | N/A | N/A |
| 10399198 | Ncoa4 /// Gm6768               | N/A | N/A |
| 10399208 | Tmem196                        | N/A | N/A |
| 10399212 | Tmem196                        | N/A | N/A |
| 10399214 | Rab10                          | N/A | N/A |
| 10399224 | 1110002L01Rik /// Kif3c        | N/A | N/A |
| 10399228 | ---                            | N/A | N/A |
| 10399232 | ---                            | N/A | N/A |
| 10399234 | Efr3b                          | N/A | N/A |
| 10399254 | Cenpo /// Adcy3                | N/A | N/A |
| 10399265 | Ncoa1                          | N/A | N/A |
| 10399290 | 4930417G10Rik                  | N/A | N/A |
| 10399299 | A830093I24Rik                  | N/A | N/A |
| 10399337 | Khl29                          | N/A | N/A |
| 10399352 | ---                            | N/A | N/A |
| 10399354 | ---                            | N/A | N/A |
| 10399357 | Gdf7                           | N/A | N/A |
| 10399376 | ---                            | N/A | N/A |
| 10399379 | Pgk1                           | N/A | N/A |
| 10399383 | Kcns3                          | N/A | N/A |
| 10399387 | Msgn1                          | N/A | N/A |
| 10399389 | 1700034J04Rik                  | N/A | N/A |
| 10399407 | Vsnl1                          | N/A | N/A |
| 10399415 | ---                            | N/A | N/A |
| 10399419 | Tubb2b /// Tubb2a-ps2          | N/A | N/A |
| 10399426 | ---                            | N/A | N/A |
| 10399428 | Snord118                       | N/A | N/A |
| 10399430 | Ddx1                           | N/A | N/A |
| 10399457 | Akr1b3 /// Gm6644              | N/A | N/A |
| 10399459 | ---                            | N/A | N/A |
| 10399461 | ---                            | N/A | N/A |
| 10399463 | ---                            | N/A | N/A |
| 10399465 | Fam84a                         | N/A | N/A |
| 10399470 | Trib2                          | N/A | N/A |
| 10399555 | Kcnf1                          | N/A | N/A |
| 10399575 | ---                            | N/A | N/A |
| 10399579 | 1700030C10Rik                  | N/A | N/A |
| 10399581 | ---                            | N/A | N/A |
| 10399584 | G730007D18Rik                  | N/A | N/A |
| 10399586 | Zfp125                         | N/A | N/A |
| 10399588 | Zfp125                         | N/A | N/A |

|          |                                       |     |     |
|----------|---------------------------------------|-----|-----|
| 10399591 | ---                                   | N/A | N/A |
| 10399593 | Itgb1bp1                              | N/A | N/A |
| 10399605 | Adam17                                | N/A | N/A |
| 10399629 | Ywhaq                                 | N/A | N/A |
| 10399632 | F630048H11Rik                         | N/A | N/A |
| 10399634 | LOC100043371 /// 6030426L16Rik        | N/A | N/A |
| 10399636 | Mrt04                                 | N/A | N/A |
| 10399640 | LOC100043371                          | N/A | N/A |
| 10399642 | ---                                   | N/A | N/A |
| 10399655 | Gm4425                                | N/A | N/A |
| 10399657 | ---                                   | N/A | N/A |
| 10399659 | ---                                   | N/A | N/A |
| 10399661 | Gm10330                               | N/A | N/A |
| 10399663 | LOC100043371                          | N/A | N/A |
| 10399666 | LOC100043371 /// 9030624G23Rik        | N/A | N/A |
| 10399671 | Hpcal1 /// 2410018L13Rik              | N/A | N/A |
| 10399675 | ---                                   | N/A | N/A |
| 10399677 | Cox7a2l                               | N/A | N/A |
| 10399689 | ---                                   | N/A | N/A |
| 10399691 | ld2                                   | N/A | N/A |
| 10399696 | Rnf144a                               | N/A | N/A |
| 10399710 | Rsad2                                 | N/A | N/A |
| 10399720 | ---                                   | N/A | N/A |
| 10399722 | Gm9866                                | N/A | N/A |
| 10399725 | Sox11                                 | N/A | N/A |
| 10399760 | Rps7 /// Gm9493                       | N/A | N/A |
| 10399768 | Ttc15                                 | N/A | N/A |
| 10399820 | Acp1                                  | N/A | N/A |
| 10399823 | ---                                   | N/A | N/A |
| 10399825 | Dld                                   | N/A | N/A |
| 10399841 | Cbl1                                  | N/A | N/A |
| 10399852 | ---                                   | N/A | N/A |
| 10399892 | Gpr22                                 | N/A | N/A |
| 10399897 | Hbp1 /// Cog5                         | N/A | N/A |
| 10399941 | ---                                   | N/A | N/A |
| 10399943 | Cdhr3                                 | N/A | N/A |
| 10399973 | Hdac9 /// LOC100504541                | N/A | N/A |
| 10400002 | 4921508M14Rik                         | N/A | N/A |
| 10400004 | Mir680-3                              | N/A | N/A |
| 10400006 | Ahr                                   | N/A | N/A |
| 10400023 | Tspan13                               | N/A | N/A |
| 10400052 | Ispd                                  | N/A | N/A |
| 10400054 | ---                                   | N/A | N/A |
| 10400095 | Ifrd1 /// Gm7008                      | N/A | N/A |
| 10400109 | Zfp277                                | N/A | N/A |
| 10400124 | ---                                   | N/A | N/A |
| 10400131 | Gm10165                               | N/A | N/A |
| 10400135 | ---                                   | N/A | N/A |
| 10400137 | Dnajb9                                | N/A | N/A |
| 10400141 | Zbed4 /// 4930529C04Rik               | N/A | N/A |
| 10400143 | Stxbp6                                | N/A | N/A |
| 10400153 | Hmgbl1                                | N/A | N/A |
| 10400155 | Nova1                                 | N/A | N/A |
| 10400157 | Nova1                                 | N/A | N/A |
| 10400165 | Tfb2m                                 | N/A | N/A |
| 10400170 | Prkd1                                 | N/A | N/A |
| 10400189 | ---                                   | N/A | N/A |
| 10400191 | Strn3                                 | N/A | N/A |
| 10400210 | Hectd1                                | N/A | N/A |
| 10400293 | 6530401N04Rik                         | N/A | N/A |
| 10400299 | Gpr33                                 | N/A | N/A |
| 10400302 | ---                                   | N/A | N/A |
| 10400304 | Egln3                                 | N/A | N/A |
| 10400319 | Gm10465                               | N/A | N/A |
| 10400321 | 1110002B05Rik                         | N/A | N/A |
| 10400324 | ---                                   | N/A | N/A |
| 10400334 | Rpl31 /// Gm16382                     | N/A | N/A |
| 10400336 | Snx6                                  | N/A | N/A |
| 10400350 | Cfl2                                  | N/A | N/A |
| 10400391 | Polr2h                                | N/A | N/A |
| 10400393 | Fam177a /// 1700047117Rik2 /// Gm9802 | N/A | N/A |
| 10400395 | Ppp2r3c                               | N/A | N/A |
| 10400405 | Nfkbia                                | N/A | N/A |
| 10400413 | Ralgapa1                              | N/A | N/A |
| 10400460 | Mbip                                  | N/A | N/A |
| 10400470 | Cox6c                                 | N/A | N/A |
| 10400504 | Foxa1                                 | N/A | N/A |
| 10400508 | Rpl26-ps2                             | N/A | N/A |
| 10400510 | Clec14a                               | N/A | N/A |
| 10400515 | Sec23a                                | N/A | N/A |
| 10400538 | Trappc6b                              | N/A | N/A |
| 10400544 | Rpl21                                 | N/A | N/A |
| 10400546 | Fbxo33                                | N/A | N/A |
| 10400555 | ---                                   | N/A | N/A |

|          |                                                                                                                         |     |     |
|----------|-------------------------------------------------------------------------------------------------------------------------|-----|-----|
| 10400557 | ---                                                                                                                     | N/A | N/A |
| 10400559 | ---                                                                                                                     | N/A | N/A |
| 10400562 | ---                                                                                                                     | N/A | N/A |
| 10400570 | ---                                                                                                                     | N/A | N/A |
| 10400572 | Klh28                                                                                                                   | N/A | N/A |
| 10400581 | Fkbp3 /// Prpf39                                                                                                        | N/A | N/A |
| 10400605 | Rpl10l                                                                                                                  | N/A | N/A |
| 10400607 | Mdga2                                                                                                                   | N/A | N/A |
| 10400609 | Mdga2                                                                                                                   | N/A | N/A |
| 10400628 | ---                                                                                                                     | N/A | N/A |
| 10400630 | ---                                                                                                                     | N/A | N/A |
| 10400635 | Rps29                                                                                                                   | N/A | N/A |
| 10400639 | 1110034A24Rik /// Rpl36al                                                                                               | N/A | N/A |
| 10400642 | 1110034A24Rik /// 9330151L19Rik                                                                                         | N/A | N/A |
| 10400704 | ---                                                                                                                     | N/A | N/A |
| 10400706 | Arf6 /// Gm9887                                                                                                         | N/A | N/A |
| 10400708 | ---                                                                                                                     | N/A | N/A |
| 10400710 | Gm71                                                                                                                    | N/A | N/A |
| 10400718 | Sos2                                                                                                                    | N/A | N/A |
| 10400740 | ---                                                                                                                     | N/A | N/A |
| 10400748 | Cdk1                                                                                                                    | N/A | N/A |
| 10400760 | Mir681                                                                                                                  | N/A | N/A |
| 10400762 | Map4k5                                                                                                                  | N/A | N/A |
| 10400803 | ---                                                                                                                     | N/A | N/A |
| 10400844 | Pygl                                                                                                                    | N/A | N/A |
| 10400866 | Trim9                                                                                                                   | N/A | N/A |
| 10400883 | Timm9                                                                                                                   | N/A | N/A |
| 10400892 | ---                                                                                                                     | N/A | N/A |
| 10400894 | Gpr135                                                                                                                  | N/A | N/A |
| 10400896 | 2810055F11Rik                                                                                                           | N/A | N/A |
| 10400926 | Rtn1                                                                                                                    | N/A | N/A |
| 10400941 | Dhrs7                                                                                                                   | N/A | N/A |
| 10400948 | 4930447C04Rik                                                                                                           | N/A | N/A |
| 10400971 | Six4                                                                                                                    | N/A | N/A |
| 10400981 | D830013O20Rik                                                                                                           | N/A | N/A |
| 10400984 | Tmem30b                                                                                                                 | N/A | N/A |
| 10400989 | Kcnh5                                                                                                                   | N/A | N/A |
| 10401007 | Ppp2r5e                                                                                                                 | N/A | N/A |
| 10401023 | Wdr89 /// Rplp2                                                                                                         | N/A | N/A |
| 10401028 | Sgpp1                                                                                                                   | N/A | N/A |
| 10401050 | ---                                                                                                                     | N/A | N/A |
| 10401063 | Zbtb25                                                                                                                  | N/A | N/A |
| 10401114 | Rab15                                                                                                                   | N/A | N/A |
| 10401128 | Max                                                                                                                     | N/A | N/A |
| 10401136 | ---                                                                                                                     | N/A | N/A |
| 10401138 | Atp6v1d                                                                                                                 | N/A | N/A |
| 10401166 | Pigh /// Plekhh1                                                                                                        | N/A | N/A |
| 10401172 | Vti1b /// Arg2                                                                                                          | N/A | N/A |
| 10401244 | Actn1                                                                                                                   | N/A | N/A |
| 10401267 | Dcaf5                                                                                                                   | N/A | N/A |
| 10401278 | Erh                                                                                                                     | N/A | N/A |
| 10401283 | ---                                                                                                                     | N/A | N/A |
| 10401286 | Gm1568                                                                                                                  | N/A | N/A |
| 10401289 | Slc10a1                                                                                                                 | N/A | N/A |
| 10401296 | Slc8a3                                                                                                                  | N/A | N/A |
| 10401309 | Cox16                                                                                                                   | N/A | N/A |
| 10401317 | Gm4787                                                                                                                  | N/A | N/A |
| 10401320 | Adam4                                                                                                                   | N/A | N/A |
| 10401322 | Synj2bp /// Cox16                                                                                                       | N/A | N/A |
| 10401330 | Adam21                                                                                                                  | N/A | N/A |
| 10401343 | Map3k9                                                                                                                  | N/A | N/A |
| 10401359 | Dpf3                                                                                                                    | N/A | N/A |
| 10401365 | Zfyve1                                                                                                                  | N/A | N/A |
| 10401382 | Numb                                                                                                                    | N/A | N/A |
| 10401416 | 2410016O06Rik                                                                                                           | N/A | N/A |
| 10401418 | 4732463B04Rik                                                                                                           | N/A | N/A |
| 10401420 | ---                                                                                                                     | N/A | N/A |
| 10401422 | Pnma1                                                                                                                   | N/A | N/A |
| 10401428 | C130039O16Rik                                                                                                           | N/A | N/A |
| 10401441 | Gm5436                                                                                                                  | N/A | N/A |
| 10401443 | Fam161b                                                                                                                 | N/A | N/A |
| 10401454 | Entpd5                                                                                                                  | N/A | N/A |
| 10401473 | Aldh6a1                                                                                                                 | N/A | N/A |
| 10401511 | Tmem90a                                                                                                                 | N/A | N/A |
| 10401564 | 1110018G07Rik                                                                                                           | N/A | N/A |
| 10401595 | Rps6kl1                                                                                                                 | N/A | N/A |
| 10401616 | Mlh3                                                                                                                    | N/A | N/A |
| 10401637 | Nek9                                                                                                                    | N/A | N/A |
| 10401667 | 0610007P14Rik                                                                                                           | N/A | N/A |
| 10401684 | Angel1                                                                                                                  | N/A | N/A |
| 10401695 | p21 /// Gm6813 /// Gm9104 /// Rpl21-ps4 /// Rpl21-ps7 /// Gm16416 /// Rpl21-ps12 /// Rpl21-ps14 /// Rpl21-ps10 /// Gm80 | N/A | N/A |
| 10401698 | 6430527G18Rik                                                                                                           | N/A | N/A |
| 10401702 | Zdhhc22                                                                                                                 | N/A | N/A |
| 10401705 | Zdhhc22                                                                                                                 | N/A | N/A |

|          |                                                                   |     |     |
|----------|-------------------------------------------------------------------|-----|-----|
| 10401708 | Ngb                                                               | N/A | N/A |
| 10401713 | Pomt2                                                             | N/A | N/A |
| 10401737 | Tmed8                                                             | N/A | N/A |
| 10401743 | 4933437F05Rik                                                     | N/A | N/A |
| 10401753 | Vipar                                                             | N/A | N/A |
| 10401781 | Sptlc2                                                            | N/A | N/A |
| 10401795 | Nrp /// Alkbh1                                                    | N/A | N/A |
| 10401803 | ---                                                               | N/A | N/A |
| 10401805 | Snw1                                                              | N/A | N/A |
| 10401820 | Gm16381                                                           | N/A | N/A |
| 10401822 | Gm4027 /// BB287469 /// Gm5662                                    | N/A | N/A |
| 10401829 | BB287469 /// Eif1a /// Gm4027 /// Gm8300 /// Gm2022 /// Gm16368   | N/A | N/A |
| 10401882 | Gtf2a1                                                            | N/A | N/A |
| 10401891 | Ston2                                                             | N/A | N/A |
| 10401924 | Rpl31 /// Rpl31-ps1 /// Gm16382                                   | N/A | N/A |
| 10401931 | ---                                                               | N/A | N/A |
| 10401933 | ---                                                               | N/A | N/A |
| 10401935 | BC005685                                                          | N/A | N/A |
| 10401937 | ---                                                               | N/A | N/A |
| 10401939 | Lysmd1                                                            | N/A | N/A |
| 10401948 | ---                                                               | N/A | N/A |
| 10401956 | ---                                                               | N/A | N/A |
| 10401968 | Galc                                                              | N/A | N/A |
| 10401987 | Kcnk10                                                            | N/A | N/A |
| 10401997 | Ptpn21                                                            | N/A | N/A |
| 10402020 | Eml5                                                              | N/A | N/A |
| 10402061 | Eml5                                                              | N/A | N/A |
| 10402063 | Foxn3                                                             | N/A | N/A |
| 10402066 | Foxn3                                                             | N/A | N/A |
| 10402096 | Ttc7b                                                             | N/A | N/A |
| 10402117 | Rps6ka5                                                           | N/A | N/A |
| 10402136 | Gpr68                                                             | N/A | N/A |
| 10402140 | Gpr68 /// Gm10431                                                 | N/A | N/A |
| 10402179 | Smek1                                                             | N/A | N/A |
| 10402211 | Fbln5                                                             | N/A | N/A |
| 10402225 | Trip11                                                            | N/A | N/A |
| 10402262 | Gm2695                                                            | N/A | N/A |
| 10402266 | ---                                                               | N/A | N/A |
| 10402268 | Lgmn                                                              | N/A | N/A |
| 10402283 | Itpk1                                                             | N/A | N/A |
| 10402294 | Moap1 /// LOC100233175                                            | N/A | N/A |
| 10402302 | Btbd7                                                             | N/A | N/A |
| 10402314 | Rps2 /// Rps2-ps6                                                 | N/A | N/A |
| 10402316 | Rpl29                                                             | N/A | N/A |
| 10402334 | 9330161L09Rik                                                     | N/A | N/A |
| 10402336 | Ddx24                                                             | N/A | N/A |
| 10402360 | Serpina10                                                         | N/A | N/A |
| 10402368 | Serpina6                                                          | N/A | N/A |
| 10402390 | Serpina1a /// Serpina1b                                           | N/A | N/A |
| 10402394 | Serpina1d                                                         | N/A | N/A |
| 10402399 | Serpina1e /// Serpina1d /// Serpina1c /// Serpina1b /// Serpina1a | N/A | N/A |
| 10402406 | Serpina1c                                                         | N/A | N/A |
| 10402409 | Serpina1a /// Serpina1b /// Serpina1c /// Serpina1e               | N/A | N/A |
| 10402415 | Serpina11                                                         | N/A | N/A |
| 10402440 | Gsc                                                               | N/A | N/A |
| 10402444 | Dicer1                                                            | N/A | N/A |
| 10402473 | Clmn                                                              | N/A | N/A |
| 10402512 | Scarna13                                                          | N/A | N/A |
| 10402519 | Atg2b                                                             | N/A | N/A |
| 10402542 | Atg2b                                                             | N/A | N/A |
| 10402554 | Bcl11b                                                            | N/A | N/A |
| 10402560 | A130014H13Rik                                                     | N/A | N/A |
| 10402570 | Gm10427                                                           | N/A | N/A |
| 10402572 | Ccdc85c                                                           | N/A | N/A |
| 10402579 | Slc25a29                                                          | N/A | N/A |
| 10402585 | Wars                                                              | N/A | N/A |
| 10402598 | Begain                                                            | N/A | N/A |
| 10402604 | ---                                                               | N/A | N/A |
| 10402606 | Rtl1 /// Mir431 /// 6430411K18Rik                                 | N/A | N/A |
| 10402615 | Hsp90aa1                                                          | N/A | N/A |
| 10402630 | Stk30                                                             | N/A | N/A |
| 10402648 | Brp44l                                                            | N/A | N/A |
| 10402650 | Cinp                                                              | N/A | N/A |
| 10402665 | Cdc42bpb                                                          | N/A | N/A |
| 10402703 | 1200009I06Rik /// Gm10425                                         | N/A | N/A |
| 10402705 | Gm266                                                             | N/A | N/A |
| 10402721 | Xrcc3                                                             | N/A | N/A |
| 10402730 | Ppp1r13b                                                          | N/A | N/A |
| 10402752 | 2010107E04Rik                                                     | N/A | N/A |
| 10402761 | Tmem179                                                           | N/A | N/A |
| 10402766 | Akt1                                                              | N/A | N/A |
| 10402783 | Ahnak2                                                            | N/A | N/A |
| 10402835 | Nudt14                                                            | N/A | N/A |
| 10402841 | Brf1                                                              | N/A | N/A |

|          |                                                                                                           |     |     |
|----------|-----------------------------------------------------------------------------------------------------------|-----|-----|
| 10402986 | ---                                                                                                       | N/A | N/A |
| 10402988 | ---                                                                                                       | N/A | N/A |
| 10402991 | Igh-VX24 /// Gm16970                                                                                      | N/A | N/A |
| 10403013 | ---                                                                                                       | N/A | N/A |
| 10403018 | Ai324046 /// IghmAC38.205.12                                                                              | N/A | N/A |
| 10403021 | ---                                                                                                       | N/A | N/A |
| 10403034 | LOC100046275                                                                                              | N/A | N/A |
| 10403043 | Ighv1-72                                                                                                  | N/A | N/A |
| 10403046 | Ai324046                                                                                                  | N/A | N/A |
| 10403048 | Ighv1-72 /// LOC631518                                                                                    | N/A | N/A |
| 10403052 | ---                                                                                                       | N/A | N/A |
| 10403054 | LOC435333                                                                                                 | N/A | N/A |
| 10403063 | LOC100046275                                                                                              | N/A | N/A |
| 10403071 | ---                                                                                                       | N/A | N/A |
| 10403076 | ---                                                                                                       | N/A | N/A |
| 10403079 | LOC435333                                                                                                 | N/A | N/A |
| 10403108 | Hmgn2                                                                                                     | N/A | N/A |
| 10403110 | Gm10421                                                                                                   | N/A | N/A |
| 10403193 | Sp4                                                                                                       | N/A | N/A |
| 10403229 | Itgb8                                                                                                     | N/A | N/A |
| 10403244 | ---                                                                                                       | N/A | N/A |
| 10403246 | ---                                                                                                       | N/A | N/A |
| 10403258 | Gdi2                                                                                                      | N/A | N/A |
| 10403281 | Calm4                                                                                                     | N/A | N/A |
| 10403291 | Akr1c14                                                                                                   | N/A | N/A |
| 10403303 | Akr1c13                                                                                                   | N/A | N/A |
| 10403312 | Akr1c19                                                                                                   | N/A | N/A |
| 10403322 | Akr1c6                                                                                                    | N/A | N/A |
| 10403346 | Rpl29 /// Gm3550 /// Rpl29-ps2                                                                            | N/A | N/A |
| 10403348 | Gm5444                                                                                                    | N/A | N/A |
| 10403361 | Pitrm1 /// Pfkp                                                                                           | N/A | N/A |
| 10403392 | ---                                                                                                       | N/A | N/A |
| 10403394 | ---                                                                                                       | N/A | N/A |
| 10403396 | Adarb2                                                                                                    | N/A | N/A |
| 10403413 | Idi1                                                                                                      | N/A | N/A |
| 10403428 | Larp4b                                                                                                    | N/A | N/A |
| 10403453 | Dip2c                                                                                                     | N/A | N/A |
| 10403455 | Dip2c                                                                                                     | N/A | N/A |
| 10403462 | Dip2c                                                                                                     | N/A | N/A |
| 10403464 | Dip2c                                                                                                     | N/A | N/A |
| 10403466 | Dip2c                                                                                                     | N/A | N/A |
| 10403508 | ---                                                                                                       | N/A | N/A |
| 10403511 | Heatr1                                                                                                    | N/A | N/A |
| 10403577 | ---                                                                                                       | N/A | N/A |
| 10403584 | Nid1                                                                                                      | N/A | N/A |
| 10403604 | Lyst                                                                                                      | N/A | N/A |
| 10403664 | B3galnt2 /// Tbce                                                                                         | N/A | N/A |
| 10403680 | Arid4b                                                                                                    | N/A | N/A |
| 10403706 | Psm2                                                                                                      | N/A | N/A |
| 10403716 | AW209491                                                                                                  | N/A | N/A |
| 10403743 | Inhba                                                                                                     | N/A | N/A |
| 10403748 | ---                                                                                                       | N/A | N/A |
| 10403754 | Bat4                                                                                                      | N/A | N/A |
| 10403756 | 1600012F09Rik                                                                                             | N/A | N/A |
| 10403761 | ---                                                                                                       | N/A | N/A |
| 10403765 | Vps41                                                                                                     | N/A | N/A |
| 10403796 | Amph                                                                                                      | N/A | N/A |
| 10403834 | Sfrp4                                                                                                     | N/A | N/A |
| 10403842 | Elmo1                                                                                                     | N/A | N/A |
| 10403897 | ---                                                                                                       | N/A | N/A |
| 10403899 | Olfr263-ps1                                                                                               | N/A | N/A |
| 10403903 | Trim27                                                                                                    | N/A | N/A |
| 10403911 | Gpx6                                                                                                      | N/A | N/A |
| 10403917 | Olfr1367                                                                                                  | N/A | N/A |
| 10403929 | Zkscan4 /// Gm10065                                                                                       | N/A | N/A |
| 10403934 | Isca1 /// AK157302                                                                                        | N/A | N/A |
| 10403936 | Olfr1359 /// Olfr1360                                                                                     | N/A | N/A |
| 10403941 | Hist1h3a /// Hist1h3i /// Hist1h3g /// Hist1h3h /// Hist1h3b /// Hist1h3d /// Hist1h3e                    | N/A | N/A |
| 10403943 | Hist1h2bm                                                                                                 | N/A | N/A |
| 10403948 | Hist1h2bg                                                                                                 | N/A | N/A |
| 10403955 | Hist1h2ai /// Hist1h2ad /// Hist1h2af /// Hist1h2ah /// Gm11276 /// Hist1h2ao /// Hist1h2an /// Hist1h2ak | N/A | N/A |
| 10403957 | Hist1h4m /// Hist1h4b /// Hist1h4f /// Hist1h4a /// Hist1h4i /// Gm11275                                  | N/A | N/A |
| 10403959 | Gm11277                                                                                                   | N/A | N/A |
| 10403973 | Pom12112                                                                                                  | N/A | N/A |
| 10403978 | Hist1h2bk                                                                                                 | N/A | N/A |
| 10403980 | Gm11277                                                                                                   | N/A | N/A |
| 10403982 | Vmn1r188                                                                                                  | N/A | N/A |
| 10403984 | Vmn1r194                                                                                                  | N/A | N/A |
| 10403986 | Vmn1r195                                                                                                  | N/A | N/A |
| 10403988 | Vmn1r191 /// Vmn1r196 /// Vmn1r188 /// Vmn1r214 /// Vmn1r203 /// Vmn1r219 /// Vmn1r189                    | N/A | N/A |
| 10403992 | Vmn1r198                                                                                                  | N/A | N/A |
| 10403996 | Vmn1r200                                                                                                  | N/A | N/A |
| 10403998 | Vmn1r-ps103                                                                                               | N/A | N/A |
| 10404002 | Vmn1r203                                                                                                  | N/A | N/A |

|          |                                                                                                                                |     |     |
|----------|--------------------------------------------------------------------------------------------------------------------------------|-----|-----|
| 10404004 | Vmn1r223 /// Vmn1r204 /// Vmn1r193                                                                                             | N/A | N/A |
| 10404008 | Vmn1r213                                                                                                                       | N/A | N/A |
| 10404010 | Vmn1r214                                                                                                                       | N/A | N/A |
| 10404014 | Vmn1r216                                                                                                                       | N/A | N/A |
| 10404016 | Vmn1r218                                                                                                                       | N/A | N/A |
| 10404018 | Vmn1r219                                                                                                                       | N/A | N/A |
| 10404020 | Vmn1r221 /// Vmn1r-ps103 /// Vmn1r189                                                                                          | N/A | N/A |
| 10404022 | Vmn1r223 /// Vmn1r204 /// Vmn1r190-ps                                                                                          | N/A | N/A |
| 10404024 | Hist1h4h                                                                                                                       | N/A | N/A |
| 10404026 | Gm11276 /// Hist1h2ao /// Hist1h2ai /// Hist1h2ad /// Hist1h2af /// Hist1h2ah /// Hist1h2an /// Hist1h2ak                      | N/A | N/A |
| 10404028 | Hist1h3i /// Hist1h3g /// Hist1h3h /// Hist1h3b /// Hist1h3d /// Hist1h3e                                                      | N/A | N/A |
| 10404033 | Hist1h1d                                                                                                                       | N/A | N/A |
| 10404036 | Hist1h2bg                                                                                                                      | N/A | N/A |
| 10404045 | 1276 /// Hist1h2ao /// Hist1h2ai /// Hist1h2ad /// Hist1h2af /// Hist1h2ah /// Hist1h2ae /// Hist1h2ag /// Hist1h2an /// Hist1 | N/A | N/A |
| 10404049 | Hist1h3i /// Hist1h3h /// Hist1h3b /// Hist1h3d /// Hist1h3e                                                                   | N/A | N/A |
| 10404051 | Hist1h4d                                                                                                                       | N/A | N/A |
| 10404053 | Hist1h2bc                                                                                                                      | N/A | N/A |
| 10404061 | Hist1h2bb                                                                                                                      | N/A | N/A |
| 10404063 | Hist1h2ab                                                                                                                      | N/A | N/A |
| 10404065 | Hist1h3i /// Hist1h3c /// Hist1h3h /// Hist1h3b /// Hist1h3d /// Hist1h3e /// Hist2h3b                                         | N/A | N/A |
| 10404067 | Hist1h4m /// Hist1h4c /// Hist1h4a /// Hist1h4b /// Hist1h4f /// Gm11275                                                       | N/A | N/A |
| 10404069 | Hist1h1a                                                                                                                       | N/A | N/A |
| 10404077 | Slc17a2                                                                                                                        | N/A | N/A |
| 10404097 | Slc17a3                                                                                                                        | N/A | N/A |
| 10404127 | Hist1h2aa                                                                                                                      | N/A | N/A |
| 10404129 | Lrrc16a /// 493342718Rik                                                                                                       | N/A | N/A |
| 10404132 | Cmah                                                                                                                           | N/A | N/A |
| 10404152 | Fam65b                                                                                                                         | N/A | N/A |
| 10404187 | Tdp2                                                                                                                           | N/A | N/A |
| 10404195 | D130043K22Rik                                                                                                                  | N/A | N/A |
| 10404218 | Gpld1                                                                                                                          | N/A | N/A |
| 10404250 | Dcdc2a                                                                                                                         | N/A | N/A |
| 10404262 | Rps8 /// Gm11353 /// Rps8-ps1                                                                                                  | N/A | N/A |
| 10404354 | Rps18 /// Gm10260                                                                                                              | N/A | N/A |
| 10404376 | Agtr1a                                                                                                                         | N/A | N/A |
| 10404380 | Dusp22                                                                                                                         | N/A | N/A |
| 10404400 | Gm5447                                                                                                                         | N/A | N/A |
| 10404402 | Foxq1                                                                                                                          | N/A | N/A |
| 10404404 | Foxf2                                                                                                                          | N/A | N/A |
| 10404422 | Serpnb6b                                                                                                                       | N/A | N/A |
| 10404429 | Serpnb9                                                                                                                        | N/A | N/A |
| 10404447 | Serpnb1b                                                                                                                       | N/A | N/A |
| 10404496 | Nqo2                                                                                                                           | N/A | N/A |
| 10404506 | Ripk1                                                                                                                          | N/A | N/A |
| 10404521 | Bphl                                                                                                                           | N/A | N/A |
| 10404538 | Prpf4b                                                                                                                         | N/A | N/A |
| 10404575 | ---                                                                                                                            | N/A | N/A |
| 10404593 | ---                                                                                                                            | N/A | N/A |
| 10404595 | Ppp1r3g                                                                                                                        | N/A | N/A |
| 10404597 | Fars2                                                                                                                          | N/A | N/A |
| 10404606 | Ly86                                                                                                                           | N/A | N/A |
| 10404612 | Rreb1                                                                                                                          | N/A | N/A |
| 10404630 | Riok1                                                                                                                          | N/A | N/A |
| 10404649 | Dsp                                                                                                                            | N/A | N/A |
| 10404700 | Ubxn2a                                                                                                                         | N/A | N/A |
| 10404702 | Gcnt2                                                                                                                          | N/A | N/A |
| 10404717 | Pak1ip1                                                                                                                        | N/A | N/A |
| 10404731 | Tmem14c                                                                                                                        | N/A | N/A |
| 10404763 | Tmem170b                                                                                                                       | N/A | N/A |
| 10404772 | Gm10790                                                                                                                        | N/A | N/A |
| 10404774 | Hivep1                                                                                                                         | N/A | N/A |
| 10404792 | Phactr1                                                                                                                        | N/A | N/A |
| 10404815 | Sirt5                                                                                                                          | N/A | N/A |
| 10404827 | Nol7                                                                                                                           | N/A | N/A |
| 10404836 | Rnf182                                                                                                                         | N/A | N/A |
| 10404840 | Cd83                                                                                                                           | N/A | N/A |
| 10404870 | ---                                                                                                                            | N/A | N/A |
| 10404872 | Hspb1 /// Gm9817                                                                                                               | N/A | N/A |
| 10404874 | Myliip                                                                                                                         | N/A | N/A |
| 10404885 | Gmpr                                                                                                                           | N/A | N/A |
| 10404895 | 5033430115Rik                                                                                                                  | N/A | N/A |
| 10404913 | Cap2                                                                                                                           | N/A | N/A |
| 10404928 | C78339                                                                                                                         | N/A | N/A |
| 10404937 | ---                                                                                                                            | N/A | N/A |
| 10404939 | 2010001K21Rik                                                                                                                  | N/A | N/A |
| 10404941 | Kdm1b                                                                                                                          | N/A | N/A |
| 10404965 | Rnf144b                                                                                                                        | N/A | N/A |
| 10404975 | Id4                                                                                                                            | N/A | N/A |
| 10404996 | Ninj1                                                                                                                          | N/A | N/A |
| 10405001 | Bicd2                                                                                                                          | N/A | N/A |
| 10405074 | Nol8                                                                                                                           | N/A | N/A |
| 10405094 | Iars                                                                                                                           | N/A | N/A |
| 10405119 | Gm270                                                                                                                          | N/A | N/A |
| 10405121 | 2310081J21Rik                                                                                                                  | N/A | N/A |



|          |                                 |     |     |
|----------|---------------------------------|-----|-----|
| 10405123 | 2310081J21Rik                   | N/A | N/A |
| 10405154 | Gm906 /// Gm904 /// Gm8765      | N/A | N/A |
| 10405158 | Pus7                            | N/A | N/A |
| 10405163 | Spin1                           | N/A | N/A |
| 10405174 | Nxn12                           | N/A | N/A |
| 10405185 | Cks2                            | N/A | N/A |
| 10405189 | ---                             | N/A | N/A |
| 10405211 | Gadd45g                         | N/A | N/A |
| 10405234 | Snrpd2 /// Gm5449 /// Gm10120   | N/A | N/A |
| 10405236 | Sfxn1                           | N/A | N/A |
| 10405263 | 4732471D19Rik                   | N/A | N/A |
| 10405280 | Arl10                           | N/A | N/A |
| 10405291 | Faf2                            | N/A | N/A |
| 10405355 | Unc5a                           | N/A | N/A |
| 10405372 | Zfp346                          | N/A | N/A |
| 10405380 | Fgfr4                           | N/A | N/A |
| 10405427 | Prelid1 /// Rab24               | N/A | N/A |
| 10405462 | BC038268 /// Pfn3               | N/A | N/A |
| 10405483 | Prr7                            | N/A | N/A |
| 10405504 | Cam1                            | N/A | N/A |
| 10405535 | B230219D22Rik                   | N/A | N/A |
| 10405539 | Txndc15                         | N/A | N/A |
| 10405545 | Pcbd2                           | N/A | N/A |
| 10405566 | Slc25a48                        | N/A | N/A |
| 10405585 | Gm10781                         | N/A | N/A |
| 10405587 | Tgfb1                           | N/A | N/A |
| 10405605 | Smad5                           | N/A | N/A |
| 10405619 | 5133401N09Rik                   | N/A | N/A |
| 10405626 | Rpl17 /// Gm10268 /// Rpl17-ps3 | N/A | N/A |
| 10405633 | Ntrk2                           | N/A | N/A |
| 10405662 | Naa35                           | N/A | N/A |
| 10405725 | ---                             | N/A | N/A |
| 10405727 | 2410127L17Rik                   | N/A | N/A |
| 10405729 | Selk                            | N/A | N/A |
| 10405731 | 4933434E20Rik                   | N/A | N/A |
| 10405733 | 6720457D02Rik /// Zfp808        | N/A | N/A |
| 10405739 | Taf1d                           | N/A | N/A |
| 10405741 | ---                             | N/A | N/A |
| 10405745 | ---                             | N/A | N/A |
| 10405749 | ---                             | N/A | N/A |
| 10405751 | Mir713                          | N/A | N/A |
| 10405753 | Me1                             | N/A | N/A |
| 10405755 | ---                             | N/A | N/A |
| 10405779 | Mir23b                          | N/A | N/A |
| 10405781 | Mir27b                          | N/A | N/A |
| 10405783 | Mir24-1                         | N/A | N/A |
| 10405785 | 0610007P08Rik                   | N/A | N/A |
| 10405804 | 0610007P08Rik                   | N/A | N/A |
| 10405811 | Habp4                           | N/A | N/A |
| 10405820 | 1810034E14Rik                   | N/A | N/A |
| 10405822 | Cdk20                           | N/A | N/A |
| 10405833 | ---                             | N/A | N/A |
| 10405835 | ---                             | N/A | N/A |
| 10405847 | ---                             | N/A | N/A |
| 10405849 | Olfr466                         | N/A | N/A |
| 10405851 | Gm10775                         | N/A | N/A |
| 10405853 | Zfp369                          | N/A | N/A |
| 10405866 | Gm10139                         | N/A | N/A |
| 10405868 | Cbx3 /// Gm6901                 | N/A | N/A |
| 10405870 | Vmn2r122                        | N/A | N/A |
| 10405874 | Cbx3 /// Gm6901                 | N/A | N/A |
| 10405876 | Gm10324                         | N/A | N/A |
| 10405885 | ---                             | N/A | N/A |
| 10405888 | Cbx3 /// Gm6901                 | N/A | N/A |
| 10405890 | Rpl9 /// Gm5451                 | N/A | N/A |
| 10405894 | Ptdss1                          | N/A | N/A |
| 10405916 | Zfp87                           | N/A | N/A |
| 10405927 | Zfp455                          | N/A | N/A |
| 10405929 | F630042I09Rik                   | N/A | N/A |
| 10405935 | Rplp0                           | N/A | N/A |
| 10405938 | Zfp273                          | N/A | N/A |
| 10405942 | Gm10037                         | N/A | N/A |
| 10405948 | BC048507                        | N/A | N/A |
| 10405964 | 1700001L19Rik                   | N/A | N/A |
| 10405969 | ---                             | N/A | N/A |
| 10405994 | Med10                           | N/A | N/A |
| 10405999 | 8030423J24Rik                   | N/A | N/A |
| 10406003 | ---                             | N/A | N/A |
| 10406031 | Lpcat1                          | N/A | N/A |
| 10406067 | Clptm1l                         | N/A | N/A |
| 10406086 | Tert                            | N/A | N/A |
| 10406108 | ---                             | N/A | N/A |
| 10406111 | Slc12a7                         | N/A | N/A |
| 10406139 | ---                             | N/A | N/A |

|          |                                             |     |     |
|----------|---------------------------------------------|-----|-----|
| 10406141 | Brd9                                        | N/A | N/A |
| 10406171 | Tppp                                        | N/A | N/A |
| 10406198 | Ftl2 /// Ftl1 /// Mir692-1                  | N/A | N/A |
| 10406203 | Stoml2                                      | N/A | N/A |
| 10406205 | Erap1                                       | N/A | N/A |
| 10406226 | ---                                         | N/A | N/A |
| 10406229 | Pcsk1                                       | N/A | N/A |
| 10406245 | ---                                         | N/A | N/A |
| 10406248 | ---                                         | N/A | N/A |
| 10406254 | Ell2                                        | N/A | N/A |
| 10406270 | Glrx                                        | N/A | N/A |
| 10406276 | ---                                         | N/A | N/A |
| 10406278 | Rps2 /// Rps2-ps6 /// Gm5921 /// Gm6139     | N/A | N/A |
| 10406287 | Ttc37                                       | N/A | N/A |
| 10406332 | ---                                         | N/A | N/A |
| 10406334 | Mctp1                                       | N/A | N/A |
| 10406364 | 2210408I21Rik                               | N/A | N/A |
| 10406385 | Fam172a                                     | N/A | N/A |
| 10406399 | Pou5f2                                      | N/A | N/A |
| 10406405 | ---                                         | N/A | N/A |
| 10406407 | Arrdc3                                      | N/A | N/A |
| 10406417 | Actg1                                       | N/A | N/A |
| 10406419 | Lysmd3                                      | N/A | N/A |
| 10406423 | Mblac2                                      | N/A | N/A |
| 10406452 | Gm10759                                     | N/A | N/A |
| 10406456 | AY512938                                    | N/A | N/A |
| 10406459 | Ndufc1                                      | N/A | N/A |
| 10406461 | Mir9-2                                      | N/A | N/A |
| 10406464 | ---                                         | N/A | N/A |
| 10406466 | Tmem161b                                    | N/A | N/A |
| 10406482 | Ccnh                                        | N/A | N/A |
| 10406499 | Rpl21                                       | N/A | N/A |
| 10406501 | ---                                         | N/A | N/A |
| 10406504 | Edil3                                       | N/A | N/A |
| 10406530 | Tmem167                                     | N/A | N/A |
| 10406536 | Tmem167                                     | N/A | N/A |
| 10406538 | ---                                         | N/A | N/A |
| 10406546 | ---                                         | N/A | N/A |
| 10406551 | Ssbp2                                       | N/A | N/A |
| 10406564 | Acot12                                      | N/A | N/A |
| 10406581 | Msh3 /// Dhfr                               | N/A | N/A |
| 10406598 | Serinc5                                     | N/A | N/A |
| 10406622 | Gm4814 /// Cm5a5                            | N/A | N/A |
| 10406626 | Homer1                                      | N/A | N/A |
| 10406646 | Dmgdh                                       | N/A | N/A |
| 10406663 | Arsb                                        | N/A | N/A |
| 10406672 | Arsb                                        | N/A | N/A |
| 10406681 | Ap3b1                                       | N/A | N/A |
| 10406710 | Tbca                                        | N/A | N/A |
| 10406714 | Otp                                         | N/A | N/A |
| 10406718 | Wdr41                                       | N/A | N/A |
| 10406733 | Zbed3                                       | N/A | N/A |
| 10406736 | F2rl2                                       | N/A | N/A |
| 10406740 | ---                                         | N/A | N/A |
| 10406742 | Poc5                                        | N/A | N/A |
| 10406757 | Col4a3bp                                    | N/A | N/A |
| 10406777 | Gcnt4                                       | N/A | N/A |
| 10406782 | Fam169a                                     | N/A | N/A |
| 10406795 | Gfm2                                        | N/A | N/A |
| 10406817 | Enc1                                        | N/A | N/A |
| 10406823 | ---                                         | N/A | N/A |
| 10406843 | Btf3                                        | N/A | N/A |
| 10406852 | Cnn3                                        | N/A | N/A |
| 10406854 | Rpl27a /// Gm5908 /// Rpl27a-ps1 /// Gm5453 | N/A | N/A |
| 10406856 | Gm807                                       | N/A | N/A |
| 10406859 | Zfp366                                      | N/A | N/A |
| 10406865 | Mrps27                                      | N/A | N/A |
| 10406877 | Serf1                                       | N/A | N/A |
| 10406881 | Smn1                                        | N/A | N/A |
| 10406898 | Taf9                                        | N/A | N/A |
| 10406934 | Etv1 /// Gm5454                             | N/A | N/A |
| 10406939 | Rpl21 /// Rpl21-ps7 /// Gm16416             | N/A | N/A |
| 10406941 | Sgtb                                        | N/A | N/A |
| 10406953 | Trim23                                      | N/A | N/A |
| 10407034 | Htr1a                                       | N/A | N/A |
| 10407040 | Esco1                                       | N/A | N/A |
| 10407042 | Dimt1                                       | N/A | N/A |
| 10407049 | 3830408C21Rik                               | N/A | N/A |
| 10407051 | ---                                         | N/A | N/A |
| 10407072 | Elovl7                                      | N/A | N/A |
| 10407097 | Pde4d                                       | N/A | N/A |
| 10407120 | Rps3a /// Gm9000                            | N/A | N/A |
| 10407122 | ---                                         | N/A | N/A |
| 10407124 | AI452195                                    | N/A | N/A |

|          |                                                                                                                         |     |     |
|----------|-------------------------------------------------------------------------------------------------------------------------|-----|-----|
| 10407126 | Plk2                                                                                                                    | N/A | N/A |
| 10407159 | Ankrd55                                                                                                                 | N/A | N/A |
| 10407173 | Ilfst                                                                                                                   | N/A | N/A |
| 10407192 | Slc38a9                                                                                                                 | N/A | N/A |
| 10407209 | Slc38a9                                                                                                                 | N/A | N/A |
| 10407211 | Ppap2a                                                                                                                  | N/A | N/A |
| 10407251 | Ccno                                                                                                                    | N/A | N/A |
| 10407274 | Mir449c                                                                                                                 | N/A | N/A |
| 10407276 | Mir449a                                                                                                                 | N/A | N/A |
| 10407286 | BC067074                                                                                                                | N/A | N/A |
| 10407291 | Arl15                                                                                                                   | N/A | N/A |
| 10407307 | Mocs2                                                                                                                   | N/A | N/A |
| 10407316 | Pelo /// Gm10734                                                                                                        | N/A | N/A |
| 10407319 | Rpl34 /// Gm6404 /// Gm10154                                                                                            | N/A | N/A |
| 10407325 | Hmgb1                                                                                                                   | N/A | N/A |
| 10407327 | Emb                                                                                                                     | N/A | N/A |
| 10407337 | Hcn1                                                                                                                    | N/A | N/A |
| 10407346 | ---                                                                                                                     | N/A | N/A |
| 10407348 | Mrps30                                                                                                                  | N/A | N/A |
| 10407356 | Nnt /// Gm9777                                                                                                          | N/A | N/A |
| 10407358 | Paip1                                                                                                                   | N/A | N/A |
| 10407370 | 4833420G17Rik /// Gm9752                                                                                                | N/A | N/A |
| 10407387 | Gm7120                                                                                                                  | N/A | N/A |
| 10407390 | Ptbp1                                                                                                                   | N/A | N/A |
| 10407392 | BC016423                                                                                                                | N/A | N/A |
| 10407445 | Akr1c12                                                                                                                 | N/A | N/A |
| 10407454 | Gm9973                                                                                                                  | N/A | N/A |
| 10407456 | Akr1c20                                                                                                                 | N/A | N/A |
| 10407467 | Akr1e1                                                                                                                  | N/A | N/A |
| 10407481 | Pfkip                                                                                                                   | N/A | N/A |
| 10407509 | ---                                                                                                                     | N/A | N/A |
| 10407511 | ---                                                                                                                     | N/A | N/A |
| 10407513 | Wdr37                                                                                                                   | N/A | N/A |
| 10407533 | ---                                                                                                                     | N/A | N/A |
| 10407535 | Rpl10a /// Rpl10a-ps2                                                                                                   | N/A | N/A |
| 10407543 | Gtpbp4                                                                                                                  | N/A | N/A |
| 10407563 | ---                                                                                                                     | N/A | N/A |
| 10407568 | ---                                                                                                                     | N/A | N/A |
| 10407570 | Zmynd11                                                                                                                 | N/A | N/A |
| 10407591 | Chrm3                                                                                                                   | N/A | N/A |
| 10407598 | Ryr2                                                                                                                    | N/A | N/A |
| 10407707 | Gm10336                                                                                                                 | N/A | N/A |
| 10407766 | Lgals8                                                                                                                  | N/A | N/A |
| 10407792 | Gpr137b-ps /// Gpr137b                                                                                                  | N/A | N/A |
| 10407801 | Gm10811                                                                                                                 | N/A | N/A |
| 10407809 | ---                                                                                                                     | N/A | N/A |
| 10407811 | Hnrnpf                                                                                                                  | N/A | N/A |
| 10407814 | Tbce                                                                                                                    | N/A | N/A |
| 10407833 | Ggps1                                                                                                                   | N/A | N/A |
| 10407841 | Hecw1                                                                                                                   | N/A | N/A |
| 10407870 | Mrpl32                                                                                                                  | N/A | N/A |
| 10407892 | Cdk13                                                                                                                   | N/A | N/A |
| 10407907 | Rala                                                                                                                    | N/A | N/A |
| 10407912 | ---                                                                                                                     | N/A | N/A |
| 10407916 | 1600012F09Rik                                                                                                           | N/A | N/A |
| 10407921 | Vdac3                                                                                                                   | N/A | N/A |
| 10407924 | Bat4                                                                                                                    | N/A | N/A |
| 10407926 | Vdac3                                                                                                                   | N/A | N/A |
| 10407929 | Pou6f2                                                                                                                  | N/A | N/A |
| 10407946 | Stard3nl                                                                                                                | N/A | N/A |
| 10407955 | Epd1                                                                                                                    | N/A | N/A |
| 10407995 | Olfr1370                                                                                                                | N/A | N/A |
| 10408006 | ---                                                                                                                     | N/A | N/A |
| 10408008 | ---                                                                                                                     | N/A | N/A |
| 10408032 | Zfp187                                                                                                                  | N/A | N/A |
| 10408047 | Zfp389                                                                                                                  | N/A | N/A |
| 10408049 | Zfp192                                                                                                                  | N/A | N/A |
| 10408056 | Olfr1366                                                                                                                | N/A | N/A |
| 10408058 | Olfr1535                                                                                                                | N/A | N/A |
| 10408060 | Olfr1364                                                                                                                | N/A | N/A |
| 10408062 | Olfr1362                                                                                                                | N/A | N/A |
| 10408066 | Olfr1361                                                                                                                | N/A | N/A |
| 10408068 | Olfr1359 /// Olfr1360                                                                                                   | N/A | N/A |
| 10408070 | Hist1h2bc                                                                                                               | N/A | N/A |
| 10408072 | Hist1h2ai                                                                                                               | N/A | N/A |
| 10408074 | Hist1h4m                                                                                                                | N/A | N/A |
| 10408081 | Hist1h1b                                                                                                                | N/A | N/A |
| 10408083 | Hist1h3i /// Hist1h3g /// Hist1h3h /// Hist1h3b /// Hist1h3d /// Hist1h3e                                               | N/A | N/A |
| 10408085 | Gm11276 /// Hist1h2ao /// Hist1h2ai /// Hist1h2ad /// Hist1h2af /// Hist1h2ah /// Hist1h2ag /// Hist1h2an /// Hist1h2ak | N/A | N/A |
| 10408087 | Gm11277                                                                                                                 | N/A | N/A |
| 10408092 | Hist1h4i /// Hist1h4m /// Hist1h4f /// Hist1h4a /// Hist1h4b /// Gm11275                                                | N/A | N/A |
| 10408094 | Hist1h2ai /// Hist1h2ad /// Hist1h2af /// Hist1h2ah /// Gm11276 /// Hist1h2ao /// Hist1h2an /// Hist1h2ak               | N/A | N/A |
| 10408111 | Hist1h2ai /// Gm11276 /// Hist1h2ao /// Hist1h2af /// Hist1h2ah /// Hist1h2an /// Hist1h2ad /// Hist1h2ak               | N/A | N/A |
| 10408113 | Hist1h4i                                                                                                                | N/A | N/A |

|          |                                                                           |     |     |
|----------|---------------------------------------------------------------------------|-----|-----|
| 10408121 | ---                                                                       | N/A | N/A |
| 10408123 | Vmn1r189                                                                  | N/A | N/A |
| 10408125 | Vmn1r190-ps                                                               | N/A | N/A |
| 10408130 | Vmn1r191                                                                  | N/A | N/A |
| 10408132 | Vmn1r192                                                                  | N/A | N/A |
| 10408134 | Vmn1r193                                                                  | N/A | N/A |
| 10408138 | Vmn1r202                                                                  | N/A | N/A |
| 10408142 | Vmn1r206                                                                  | N/A | N/A |
| 10408144 | Vmn1r208                                                                  | N/A | N/A |
| 10408146 | Vmn1r208                                                                  | N/A | N/A |
| 10408148 | Vmn1r206 /// Vmn1r207-ps /// Vmn1r209                                     | N/A | N/A |
| 10408152 | Vmn1r211                                                                  | N/A | N/A |
| 10408154 | Vmn1r212                                                                  | N/A | N/A |
| 10408156 | Vmn1r217                                                                  | N/A | N/A |
| 10408158 | Vmn1r220                                                                  | N/A | N/A |
| 10408162 | Zfp322a                                                                   | N/A | N/A |
| 10408168 | Abt1                                                                      | N/A | N/A |
| 10408173 | ---                                                                       | N/A | N/A |
| 10408200 | Hist1h4f                                                                  | N/A | N/A |
| 10408202 | Hist1h3f /// Hist1h3i /// Hist1h3h /// Hist1h3b /// Hist1h3d /// Hist1h3e | N/A | N/A |
| 10408210 | Hist1h2bf                                                                 | N/A | N/A |
| 10408212 | Hist1h1e /// Hist1h2be                                                    | N/A | N/A |
| 10408223 | Hist1h2bc                                                                 | N/A | N/A |
| 10408225 | Hist1h4c                                                                  | N/A | N/A |
| 10408227 | Hfe                                                                       | N/A | N/A |
| 10408239 | Hist1h3f /// Hist1h3i /// Hist1h3c /// Hist1h3b /// Hist1h3d /// Hist1h3e | N/A | N/A |
| 10408243 | Hist1h4m /// Hist1h4a /// Hist1h4f /// Hist1h4b /// Gm11275               | N/A | N/A |
| 10408249 | ---                                                                       | N/A | N/A |
| 10408266 | Hist1h2ba                                                                 | N/A | N/A |
| 10408280 | Lrrc16a                                                                   | N/A | N/A |
| 10408329 | ---                                                                       | N/A | N/A |
| 10408331 | Acot13                                                                    | N/A | N/A |
| 10408335 | Aldh5a1                                                                   | N/A | N/A |
| 10408346 | Gm9983                                                                    | N/A | N/A |
| 10408348 | Mrs2                                                                      | N/A | N/A |
| 10408359 | Nrsn1                                                                     | N/A | N/A |
| 10408450 | Sox4                                                                      | N/A | N/A |
| 10408455 | Cdkal1                                                                    | N/A | N/A |
| 10408477 | E2f3                                                                      | N/A | N/A |
| 10408485 | ---                                                                       | N/A | N/A |
| 10408487 | Uqcrcfs1                                                                  | N/A | N/A |
| 10408490 | Exoc2                                                                     | N/A | N/A |
| 10408519 | Hus1b                                                                     | N/A | N/A |
| 10408523 | Foxq1                                                                     | N/A | N/A |
| 10408529 | ---                                                                       | N/A | N/A |
| 10408531 | Gm5d                                                                      | N/A | N/A |
| 10408541 | ---                                                                       | N/A | N/A |
| 10408555 | Wrnip1                                                                    | N/A | N/A |
| 10408572 | ---                                                                       | N/A | N/A |
| 10408574 | ---                                                                       | N/A | N/A |
| 10408600 | Serpib6a                                                                  | N/A | N/A |
| 10408610 | Tubb2a                                                                    | N/A | N/A |
| 10408613 | Tubb2b                                                                    | N/A | N/A |
| 10408616 | Slc22a23                                                                  | N/A | N/A |
| 10408629 | 1300014I06Rik                                                             | N/A | N/A |
| 10408636 | ---                                                                       | N/A | N/A |
| 10408656 | Peci                                                                      | N/A | N/A |
| 10408677 | Lyrn4                                                                     | N/A | N/A |
| 10408684 | Tmed10                                                                    | N/A | N/A |
| 10408687 | Hmgb1                                                                     | N/A | N/A |
| 10408689 | Nrn1                                                                      | N/A | N/A |
| 10408709 | Ssr1                                                                      | N/A | N/A |
| 10408739 | Dsp /// Gm10129                                                           | N/A | N/A |
| 10408741 | Txndc5                                                                    | N/A | N/A |
| 10408762 | Eef1e1                                                                    | N/A | N/A |
| 10408787 | ---                                                                       | N/A | N/A |
| 10408810 | ---                                                                       | N/A | N/A |
| 10408812 | Mak                                                                       | N/A | N/A |
| 10408838 | Elovl2                                                                    | N/A | N/A |
| 10408848 | ---                                                                       | N/A | N/A |
| 10408850 | Nedd9                                                                     | N/A | N/A |
| 10408870 | Tbc1d7                                                                    | N/A | N/A |
| 10408879 | Gfod1                                                                     | N/A | N/A |
| 10408882 | Ranbp9                                                                    | N/A | N/A |
| 10408898 | ---                                                                       | N/A | N/A |
| 10408900 | ---                                                                       | N/A | N/A |
| 10408915 | Dtnbp1                                                                    | N/A | N/A |
| 10408926 | ---                                                                       | N/A | N/A |
| 10408928 | Hspb1 /// Gm9817                                                          | N/A | N/A |
| 10408932 | ---                                                                       | N/A | N/A |
| 10408935 | Gm10786                                                                   | N/A | N/A |
| 10408937 | Atxn1                                                                     | N/A | N/A |
| 10408947 | Gm10113                                                                   | N/A | N/A |
| 10408950 | ---                                                                       | N/A | N/A |

|          |                                                       |     |     |
|----------|-------------------------------------------------------|-----|-----|
| 10408952 | Nup153                                                | N/A | N/A |
| 10409014 | ---                                                   | N/A | N/A |
| 10409016 | Nhlrc1                                                | N/A | N/A |
| 10409059 | Mirlet7d                                              | N/A | N/A |
| 10409061 | Mirlet7f-1                                            | N/A | N/A |
| 10409063 | Mirlet7a-1                                            | N/A | N/A |
| 10409065 | Ptpdc1                                                | N/A | N/A |
| 10409076 | Phf2                                                  | N/A | N/A |
| 10409099 | Fam120a                                               | N/A | N/A |
| 10409118 | Wnk2                                                  | N/A | N/A |
| 10409200 | Gapdh /// Gm7251                                      | N/A | N/A |
| 10409202 | ---                                                   | N/A | N/A |
| 10409204 | ---                                                   | N/A | N/A |
| 10409206 | ---                                                   | N/A | N/A |
| 10409208 | Gm906 /// Gm904 /// Gm8765                            | N/A | N/A |
| 10409212 | ---                                                   | N/A | N/A |
| 10409214 | Mir683-2 /// Mir683-1                                 | N/A | N/A |
| 10409216 | Mir683-2 /// Mir683-1                                 | N/A | N/A |
| 10409218 | 2310081J21Rik                                         | N/A | N/A |
| 10409220 | Hist2h2aa1 /// Hist2h2aa2 /// Hist2h3c1 /// Hist2h2ac | N/A | N/A |
| 10409222 | Shc3                                                  | N/A | N/A |
| 10409236 | ---                                                   | N/A | N/A |
| 10409240 | Sema4d                                                | N/A | N/A |
| 10409259 | ---                                                   | N/A | N/A |
| 10409261 | Diras2                                                | N/A | N/A |
| 10409294 | Sptlc1                                                | N/A | N/A |
| 10409319 | Drd1a                                                 | N/A | N/A |
| 10409322 | Thoc3                                                 | N/A | N/A |
| 10409330 | 4833439L19Rik                                         | N/A | N/A |
| 10409338 | Nop16                                                 | N/A | N/A |
| 10409345 | Cltb                                                  | N/A | N/A |
| 10409352 | Rnf44                                                 | N/A | N/A |
| 10409365 | Gprin1                                                | N/A | N/A |
| 10409369 | Sncb                                                  | N/A | N/A |
| 10409414 | Rab24                                                 | N/A | N/A |
| 10409434 | Lman2                                                 | N/A | N/A |
| 10409445 | BC038268 /// Pfn3                                     | N/A | N/A |
| 10409449 | F12                                                   | N/A | N/A |
| 10409464 | Dbn1                                                  | N/A | N/A |
| 10409486 | Pdlim7                                                | N/A | N/A |
| 10409508 | Ddx41                                                 | N/A | N/A |
| 10409526 | Fam193b                                               | N/A | N/A |
| 10409539 | ---                                                   | N/A | N/A |
| 10409541 | ---                                                   | N/A | N/A |
| 10409543 | ---                                                   | N/A | N/A |
| 10409557 | H2afy                                                 | N/A | N/A |
| 10409592 | Lect2                                                 | N/A | N/A |
| 10409599 | ---                                                   | N/A | N/A |
| 10409602 | Trpc7                                                 | N/A | N/A |
| 10409616 | Spock1                                                | N/A | N/A |
| 10409629 | Klhl3                                                 | N/A | N/A |
| 10409643 | Hnrnpa0                                               | N/A | N/A |
| 10409660 | Gkap1                                                 | N/A | N/A |
| 10409684 | 2210016F16Rik                                         | N/A | N/A |
| 10409689 | Hnrnpk                                                | N/A | N/A |
| 10409709 | Mir7-1                                                | N/A | N/A |
| 10409711 | ---                                                   | N/A | N/A |
| 10409737 | Agtppb1                                               | N/A | N/A |
| 10409799 | Isca1 /// AK157302                                    | N/A | N/A |
| 10409804 | Zchc6                                                 | N/A | N/A |
| 10409966 | Mir713                                                | N/A | N/A |
| 10409968 | Rps18                                                 | N/A | N/A |
| 10409978 | 6720457D02Rik /// Gm3604 /// Zfp808 /// 6720489N17Rik | N/A | N/A |
| 10409986 | 4933434E20Rik                                         | N/A | N/A |
| 10409988 | Taf1d                                                 | N/A | N/A |
| 10409990 | 6720489N17Rik                                         | N/A | N/A |
| 10409992 | ---                                                   | N/A | N/A |
| 10409994 | Gm5665                                                | N/A | N/A |
| 10410039 | Ptch1                                                 | N/A | N/A |
| 10410063 | Rpl10a /// Rpl10a-ps2                                 | N/A | N/A |
| 10410078 | Slc35d2                                               | N/A | N/A |
| 10410099 | Cdc14b                                                | N/A | N/A |
| 10410115 | 1110018J18Rik                                         | N/A | N/A |
| 10410124 | Ctsl                                                  | N/A | N/A |
| 10410134 | ---                                                   | N/A | N/A |
| 10410138 | Cntnap3                                               | N/A | N/A |
| 10410148 | Cntnap3                                               | N/A | N/A |
| 10410150 | Cntnap3                                               | N/A | N/A |
| 10410164 | Cntnap3                                               | N/A | N/A |
| 10410166 | Cntnap3                                               | N/A | N/A |
| 10410173 | Hiat1                                                 | N/A | N/A |
| 10410204 | ---                                                   | N/A | N/A |
| 10410207 | Cbx3 /// Gm6901                                       | N/A | N/A |
| 10410209 | Rybp                                                  | N/A | N/A |

|          |                    |     |     |
|----------|--------------------|-----|-----|
| 10410235 | ---                | N/A | N/A |
| 10410252 | ---                | N/A | N/A |
| 10410259 | Uqcrb /// Gm5457   | N/A | N/A |
| 10410264 | Mterfd1 /// Ptdss1 | N/A | N/A |
| 10410273 | Zfp708             | N/A | N/A |
| 10410287 | Zfp458             | N/A | N/A |
| 10410291 | Zfp457             | N/A | N/A |
| 10410295 | Zfp595             | N/A | N/A |
| 10410309 | ---                | N/A | N/A |
| 10410328 | Zfp874b            | N/A | N/A |
| 10410332 | Zfp58              | N/A | N/A |
| 10410341 | Zfp87              | N/A | N/A |
| 10410345 | Zfp748             | N/A | N/A |
| 10410351 | AA987161           | N/A | N/A |
| 10410355 | A530054K11Rik      | N/A | N/A |
| 10410362 | Zfp738             | N/A | N/A |
| 10410364 | Zfp738             | N/A | N/A |
| 10410375 | Zfp85-rs1          | N/A | N/A |
| 10410386 | E430024C06Rik      | N/A | N/A |
| 10410388 | E430024C06Rik      | N/A | N/A |
| 10410390 | ---                | N/A | N/A |
| 10410393 | Mtrr               | N/A | N/A |
| 10410408 | Adcy2              | N/A | N/A |
| 10410435 | Papd7              | N/A | N/A |
| 10410449 | A530095I07Rik      | N/A | N/A |
| 10410452 | Srd5a1             | N/A | N/A |
| 10410460 | Ube2q1             | N/A | N/A |
| 10410465 | BC018507           | N/A | N/A |
| 10410475 | ---                | N/A | N/A |
| 10410477 | Adamts16           | N/A | N/A |
| 10410506 | Rpl9 /// Gm5451    | N/A | N/A |
| 10410508 | Ndufs6             | N/A | N/A |
| 10410590 | Exoc3              | N/A | N/A |
| 10410617 | Pdcd6              | N/A | N/A |
| 10410625 | Sdha               | N/A | N/A |
| 10410641 | Lrrc14b            | N/A | N/A |
| 10410644 | Zfp72              | N/A | N/A |
| 10410650 | Zfp825             | N/A | N/A |
| 10410654 | ---                | N/A | N/A |
| 10410656 | Cast               | N/A | N/A |
| 10410687 | ---                | N/A | N/A |
| 10410695 | Rhobtb3            | N/A | N/A |
| 10410709 | Rfesd              | N/A | N/A |
| 10410721 | Arsk               | N/A | N/A |
| 10410741 | Mctp1 /// Gm10760  | N/A | N/A |
| 10410743 | Ankrd32            | N/A | N/A |
| 10410756 | Ankrd32            | N/A | N/A |
| 10410766 | Nr2f1              | N/A | N/A |
| 10410772 | Rpl21              | N/A | N/A |
| 10410774 | ---                | N/A | N/A |
| 10410776 | ---                | N/A | N/A |
| 10410877 | Polr3g             | N/A | N/A |
| 10410887 | Rps2               | N/A | N/A |
| 10410889 | ---                | N/A | N/A |
| 10410892 | Rasa1              | N/A | N/A |
| 10410919 | ---                | N/A | N/A |
| 10410921 | Cox7c /// Gm10012  | N/A | N/A |
| 10410925 | ---                | N/A | N/A |
| 10410927 | LOC280487          | N/A | N/A |
| 10410929 | Agk                | N/A | N/A |
| 10410931 | Vcan               | N/A | N/A |
| 10410947 | Xrcc4              | N/A | N/A |
| 10410959 | Atg10              | N/A | N/A |
| 10410970 | Hnrnpk             | N/A | N/A |
| 10410973 | 4833422C13Rik      | N/A | N/A |
| 10410975 | Zcchc9             | N/A | N/A |
| 10410995 | Rasgrf2            | N/A | N/A |
| 10411052 | Fam151b            | N/A | N/A |
| 10411059 | Zfyve16            | N/A | N/A |
| 10411105 | Gm10753            | N/A | N/A |
| 10411119 | Papd4              | N/A | N/A |
| 10411126 | Jmy                | N/A | N/A |
| 10411142 | Bhmt               | N/A | N/A |
| 10411147 | Bhmt2              | N/A | N/A |
| 10411156 | Scamp1             | N/A | N/A |
| 10411167 | ---                | N/A | N/A |
| 10411169 | Gm9776             | N/A | N/A |
| 10411171 | Pde8b              | N/A | N/A |
| 10411215 | Crhbp              | N/A | N/A |
| 10411229 | F2r                | N/A | N/A |
| 10411235 | lqgap2             | N/A | N/A |
| 10411272 | ---                | N/A | N/A |
| 10411274 | Sv2c               | N/A | N/A |
| 10411287 | Btf3l4             | N/A | N/A |

|          |                                                                                                                |     |     |
|----------|----------------------------------------------------------------------------------------------------------------|-----|-----|
| 10411363 | Nsa2                                                                                                           | N/A | N/A |
| 10411373 | Hexb                                                                                                           | N/A | N/A |
| 10411390 | ---                                                                                                            | N/A | N/A |
| 10411393 | Rps18 /// Gm10260                                                                                              | N/A | N/A |
| 10411432 | Utp15                                                                                                          | N/A | N/A |
| 10411452 | Gapdh /// Gm2451                                                                                               | N/A | N/A |
| 10411454 | Sec61b                                                                                                         | N/A | N/A |
| 10411459 | Tmem171                                                                                                        | N/A | N/A |
| 10411464 | Fcho2                                                                                                          | N/A | N/A |
| 10411502 | 1700024P04Rik                                                                                                  | N/A | N/A |
| 10411506 | ---                                                                                                            | N/A | N/A |
| 10411508 | Ptcd2                                                                                                          | N/A | N/A |
| 10411519 | Mtap1b                                                                                                         | N/A | N/A |
| 10411527 | Cartpt                                                                                                         | N/A | N/A |
| 10411532 | Mccc2                                                                                                          | N/A | N/A |
| 10411552 | Bdp1                                                                                                           | N/A | N/A |
| 10411593 | Serf1                                                                                                          | N/A | N/A |
| 10411609 | ---                                                                                                            | N/A | N/A |
| 10411709 | Cdk7                                                                                                           | N/A | N/A |
| 10411711 | Cdk7                                                                                                           | N/A | N/A |
| 10411722 | Mrps36                                                                                                         | N/A | N/A |
| 10411774 | ---                                                                                                            | N/A | N/A |
| 10411776 | H3f3a /// Gm12657                                                                                              | N/A | N/A |
| 10411780 | ---                                                                                                            | N/A | N/A |
| 10411782 | Pik3r1                                                                                                         | N/A | N/A |
| 10411839 | Srsf12                                                                                                         | N/A | N/A |
| 10411853 | Erbp2ip                                                                                                        | N/A | N/A |
| 10411882 | Nln                                                                                                            | N/A | N/A |
| 10411899 | 2410002O22Rik                                                                                                  | N/A | N/A |
| 10411915 | Ppwd1                                                                                                          | N/A | N/A |
| 10411927 | Cwc27                                                                                                          | N/A | N/A |
| 10411945 | Fam159b                                                                                                        | N/A | N/A |
| 10411949 | Rgs7bp                                                                                                         | N/A | N/A |
| 10411958 | Rnf180                                                                                                         | N/A | N/A |
| 10411970 | Dph3b-ps                                                                                                       | N/A | N/A |
| 10411972 | ---                                                                                                            | N/A | N/A |
| 10411974 | Ipo11                                                                                                          | N/A | N/A |
| 10412011 | Kif2a                                                                                                          | N/A | N/A |
| 10412036 | Apoo /// Apoo-ps                                                                                               | N/A | N/A |
| 10412038 | Zswim6                                                                                                         | N/A | N/A |
| 10412054 | Ndufaf2                                                                                                        | N/A | N/A |
| 10412060 | ---                                                                                                            | N/A | N/A |
| 10412062 | ---                                                                                                            | N/A | N/A |
| 10412064 | ---                                                                                                            | N/A | N/A |
| 10412066 | Rab3c                                                                                                          | N/A | N/A |
| 10412076 | Gemin8                                                                                                         | N/A | N/A |
| 10412082 | Gbbp1                                                                                                          | N/A | N/A |
| 10412098 | Rpl41                                                                                                          | N/A | N/A |
| 10412100 | Map3k1                                                                                                         | N/A | N/A |
| 10412123 | Ncf2                                                                                                           | N/A | N/A |
| 10412177 | Skiv2l2                                                                                                        | N/A | N/A |
| 10412205 | Gm10735                                                                                                        | N/A | N/A |
| 10412207 | Gpx8                                                                                                           | N/A | N/A |
| 10412227 | Snx18                                                                                                          | N/A | N/A |
| 10412231 | Hspb3                                                                                                          | N/A | N/A |
| 10412251 | Ndufs4                                                                                                         | N/A | N/A |
| 10412258 | ---                                                                                                            | N/A | N/A |
| 10412296 | ---                                                                                                            | N/A | N/A |
| 10412298 | Irga1                                                                                                          | N/A | N/A |
| 10412328 | Pelo                                                                                                           | N/A | N/A |
| 10412335 | Isl1                                                                                                           | N/A | N/A |
| 10412345 | Parp8                                                                                                          | N/A | N/A |
| 10412376 | Emb                                                                                                            | N/A | N/A |
| 10412378 | H3f3a                                                                                                          | N/A | N/A |
| 10412380 | ---                                                                                                            | N/A | N/A |
| 10412385 | Mrps30                                                                                                         | N/A | N/A |
| 10412392 | Gm10732                                                                                                        | N/A | N/A |
| 10412394 | Nnt                                                                                                            | N/A | N/A |
| 10412414 | 4833420G17Rik /// Gm9752                                                                                       | N/A | N/A |
| 10412417 | 3110070M22Rik /// Gm7120                                                                                       | N/A | N/A |
| 10412466 | Hmgcs1                                                                                                         | N/A | N/A |
| 10412481 | 2410127L17Rik                                                                                                  | N/A | N/A |
| 10412491 | ---                                                                                                            | N/A | N/A |
| 10412517 | Gm3002 /// Gm10021 /// Gm3512                                                                                  | N/A | N/A |
| 10412537 | Gm3373                                                                                                         | N/A | N/A |
| 10412543 | m1973 /// LOC100041151 /// Gm5797 /// Gm5458 /// Gm3047 /// Gm3187 /// Gm3366 /// Gm10413 /// Gm10338 /// Gm80 | N/A | N/A |
| 10412549 | D830030K20Rik /// Gm3033 /// Gm3278 /// LOC100504200 /// Gm8050 /// Gm1973                                     | N/A | N/A |
| 10412559 | Silbp                                                                                                          | N/A | N/A |
| 10412562 | Flnb                                                                                                           | N/A | N/A |
| 10412607 | Abhd6                                                                                                          | N/A | N/A |
| 10412616 | Rpp14                                                                                                          | N/A | N/A |
| 10412624 | Pxk                                                                                                            | N/A | N/A |
| 10412650 | Kctd6                                                                                                          | N/A | N/A |
| 10412655 | 2610318M16Rik                                                                                                  | N/A | N/A |

|          |                   |     |     |
|----------|-------------------|-----|-----|
| 10412657 | ---               | N/A | N/A |
| 10412659 | ---               | N/A | N/A |
| 10412661 | ---               | N/A | N/A |
| 10412663 | ---               | N/A | N/A |
| 10412665 | Rpl21-ps4         | N/A | N/A |
| 10412667 | Ptprg             | N/A | N/A |
| 10412699 | Gm10404           | N/A | N/A |
| 10412701 | 3830406C13Rik     | N/A | N/A |
| 10412711 | Uqcrb /// Gm5457  | N/A | N/A |
| 10412729 | Sntn              | N/A | N/A |
| 10412741 | Atxn7             | N/A | N/A |
| 10412755 | ---               | N/A | N/A |
| 10412760 | Il3ra             | N/A | N/A |
| 10412771 | ---               | N/A | N/A |
| 10412773 | Slc4a7            | N/A | N/A |
| 10412805 | Nek10             | N/A | N/A |
| 10412823 | Lrrc3b            | N/A | N/A |
| 10412826 | Gm10403           | N/A | N/A |
| 10412830 | Ngly1             | N/A | N/A |
| 10412844 | Top2b             | N/A | N/A |
| 10412882 | Thrb              | N/A | N/A |
| 10412897 | ---               | N/A | N/A |
| 10412907 | ---               | N/A | N/A |
| 10412909 | Fdft1             | N/A | N/A |
| 10412911 | ---               | N/A | N/A |
| 10412919 | ---               | N/A | N/A |
| 10412943 | Nudt13            | N/A | N/A |
| 10412960 | Fam149b           | N/A | N/A |
| 10412978 | 1810062O18Rik     | N/A | N/A |
| 10412981 | Sec24c            | N/A | N/A |
| 10413008 | Fut11             | N/A | N/A |
| 10413012 | Fut11             | N/A | N/A |
| 10413014 | Chchd1            | N/A | N/A |
| 10413018 | 2310021P13Rik     | N/A | N/A |
| 10413059 | Vcl               | N/A | N/A |
| 10413086 | Adk               | N/A | N/A |
| 10413100 | Myst4             | N/A | N/A |
| 10413136 | ---               | N/A | N/A |
| 10413138 | Vdac2             | N/A | N/A |
| 10413148 | Comtd1            | N/A | N/A |
| 10413161 | Cnot1             | N/A | N/A |
| 10413174 | Rps24 /// Gm6030  | N/A | N/A |
| 10413183 | Gm10398           | N/A | N/A |
| 10413185 | Zmiz1             | N/A | N/A |
| 10413216 | 4931406H21Rik     | N/A | N/A |
| 10413220 | Zmiz1 /// Gm10397 | N/A | N/A |
| 10413222 | Ppif              | N/A | N/A |
| 10413229 | Anxa11            | N/A | N/A |
| 10413238 | Cphx              | N/A | N/A |
| 10413243 | Gm10394 /// Duxbl | N/A | N/A |
| 10413250 | Cphx              | N/A | N/A |
| 10413255 | Gm10394 /// Duxbl | N/A | N/A |
| 10413260 | Cphx              | N/A | N/A |
| 10413265 | Gm10394 /// Duxbl | N/A | N/A |
| 10413280 | ---               | N/A | N/A |
| 10413282 | Fam116a           | N/A | N/A |
| 10413304 | Arf4              | N/A | N/A |
| 10413314 | Pde12             | N/A | N/A |
| 10413316 | ---               | N/A | N/A |
| 10413333 | Dnahc12           | N/A | N/A |
| 10413416 | Il17rd            | N/A | N/A |
| 10413419 | Arhgef3           | N/A | N/A |
| 10413434 | D14Abb1e          | N/A | N/A |
| 10413461 | Erc2              | N/A | N/A |
| 10413482 | Wnt5a             | N/A | N/A |
| 10413492 | Lrtm1             | N/A | N/A |
| 10413502 | Actr8             | N/A | N/A |
| 10413517 | Chdh              | N/A | N/A |
| 10413530 | Dcp1a             | N/A | N/A |
| 10413559 | Rft1              | N/A | N/A |
| 10413574 | Sfmbt1            | N/A | N/A |
| 10413596 | Sfmbt1            | N/A | N/A |
| 10413598 | Tmem110           | N/A | N/A |
| 10413615 | Itih4             | N/A | N/A |
| 10413657 | Gltr8d1           | N/A | N/A |
| 10413670 | Pbrm1             | N/A | N/A |
| 10413695 | Pbrm1             | N/A | N/A |
| 10413697 | Pbrm1             | N/A | N/A |
| 10413710 | Nt5dc2 /// Stab1  | N/A | N/A |
| 10413726 | Tnnc1             | N/A | N/A |
| 10413752 | Bap1              | N/A | N/A |
| 10413771 | Capn7             | N/A | N/A |
| 10413795 | Eaf1              | N/A | N/A |
| 10413803 | Btd               | N/A | N/A |



|          |                                                                                      |     |     |
|----------|--------------------------------------------------------------------------------------|-----|-----|
| 10413808 | ---                                                                                  | N/A | N/A |
| 10413813 | Galnt12                                                                              | N/A | N/A |
| 10413826 | Oxnad1                                                                               | N/A | N/A |
| 10413839 | Ncoa4 /// Gm6768                                                                     | N/A | N/A |
| 10413853 | Parg                                                                                 | N/A | N/A |
| 10413874 | Ogdhl                                                                                | N/A | N/A |
| 10413897 | Ercc6                                                                                | N/A | N/A |
| 10413928 | 1810011H11Rik                                                                        | N/A | N/A |
| 10413930 | Fam170b                                                                              | N/A | N/A |
| 10413949 | Gm6340                                                                               | N/A | N/A |
| 10413977 | Gm626                                                                                | N/A | N/A |
| 10413979 | Gm626                                                                                | N/A | N/A |
| 10413981 | Gm626                                                                                | N/A | N/A |
| 10413983 | Gm626                                                                                | N/A | N/A |
| 10413985 | Gm626                                                                                | N/A | N/A |
| 10413987 | Gm626                                                                                | N/A | N/A |
| 10413989 | Gm626                                                                                | N/A | N/A |
| 10413991 | Gm626                                                                                | N/A | N/A |
| 10413993 | Gm626                                                                                | N/A | N/A |
| 10413995 | Gm626                                                                                | N/A | N/A |
| 10413997 | Gm626                                                                                | N/A | N/A |
| 10413999 | Gm626                                                                                | N/A | N/A |
| 10414001 | Gm626                                                                                | N/A | N/A |
| 10414003 | Gm626                                                                                | N/A | N/A |
| 10414025 | Gdf10                                                                                | N/A | N/A |
| 10414031 | Gdf2                                                                                 | N/A | N/A |
| 10414093 | Glud1                                                                                | N/A | N/A |
| 10414113 | Wapal                                                                                | N/A | N/A |
| 10414137 | Grid1                                                                                | N/A | N/A |
| 10414154 | Mir346                                                                               | N/A | N/A |
| 10414161 | ---                                                                                  | N/A | N/A |
| 10414163 | Lrit1                                                                                | N/A | N/A |
| 10414173 | ---                                                                                  | N/A | N/A |
| 10414175 | ---                                                                                  | N/A | N/A |
| 10414192 | Mat1a                                                                                | N/A | N/A |
| 10414211 | Mbl1                                                                                 | N/A | N/A |
| 10414218 | 1700049E17Rik1                                                                       | N/A | N/A |
| 10414228 | Gm5622 /// Gm5930 /// Gm3371                                                         | N/A | N/A |
| 10414234 | Gm5622 /// Gm5930 /// Gm3371                                                         | N/A | N/A |
| 10414241 | Gm5930 /// Gm3371                                                                    | N/A | N/A |
| 10414245 | Gm3161 /// 1700049E17Rik1 /// 1700049E17Rik2 /// 4930503E14Rik /// Gm7233 /// Gm8032 | N/A | N/A |
| 10414256 | Rbmxrt                                                                               | N/A | N/A |
| 10414260 | Ang5                                                                                 | N/A | N/A |
| 10414262 | Ear2 /// BC151093                                                                    | N/A | N/A |
| 10414265 | BC061237                                                                             | N/A | N/A |
| 10414278 | Gpr137c                                                                              | N/A | N/A |
| 10414288 | Psmc6                                                                                | N/A | N/A |
| 10414313 | Ubb /// Gm1821                                                                       | N/A | N/A |
| 10414325 | Cgrrf1                                                                               | N/A | N/A |
| 10414333 | Samd4                                                                                | N/A | N/A |
| 10414355 | Mapk1ip1l                                                                            | N/A | N/A |
| 10414366 | Fbxo34                                                                               | N/A | N/A |
| 10414372 | Gm6616                                                                               | N/A | N/A |
| 10414374 | Ktn1                                                                                 | N/A | N/A |
| 10414417 | Peli2                                                                                | N/A | N/A |
| 10414431 | ---                                                                                  | N/A | N/A |
| 10414433 | 6720456H20Rik                                                                        | N/A | N/A |
| 10414449 | Mudeng                                                                               | N/A | N/A |
| 10414460 | Naa30                                                                                | N/A | N/A |
| 10414475 | Olfir738                                                                             | N/A | N/A |
| 10414479 | Olfir740                                                                             | N/A | N/A |
| 10414481 | Olfir741                                                                             | N/A | N/A |
| 10414485 | Olfir265                                                                             | N/A | N/A |
| 10414487 | Olfir744                                                                             | N/A | N/A |
| 10414491 | Olfir746                                                                             | N/A | N/A |
| 10414493 | Olfir748                                                                             | N/A | N/A |
| 10414514 | Pnp                                                                                  | N/A | N/A |
| 10414522 | Apex1 /// Tmem55b                                                                    | N/A | N/A |
| 10414527 | Pnp /// Pnp2                                                                         | N/A | N/A |
| 10414537 | Rnase4 /// Ang                                                                       | N/A | N/A |
| 10414551 | Ear5                                                                                 | N/A | N/A |
| 10414553 | Ear14 /// Ear4                                                                       | N/A | N/A |
| 10414594 | Mett11d1                                                                             | N/A | N/A |
| 10414612 | Slc39a2                                                                              | N/A | N/A |
| 10414651 | G630016D24Rik                                                                        | N/A | N/A |
| 10414659 | Snord58b                                                                             | N/A | N/A |
| 10414661 | ---                                                                                  | N/A | N/A |
| 10414693 | Tox4                                                                                 | N/A | N/A |
| 10414697 | ---                                                                                  | N/A | N/A |
| 10414700 | Olfir1509                                                                            | N/A | N/A |
| 10414703 | Gm10886                                                                              | N/A | N/A |
| 10414706 | Gm8635                                                                               | N/A | N/A |
| 10414711 | Gm8639                                                                               | N/A | N/A |
| 10414717 | Gm5772                                                                               | N/A | N/A |

|          |                                                           |     |     |
|----------|-----------------------------------------------------------|-----|-----|
| 10414720 | ---                                                       | N/A | N/A |
| 10414723 | Gm13955                                                   | N/A | N/A |
| 10414726 | ---                                                       | N/A | N/A |
| 10414728 | Gm7174                                                    | N/A | N/A |
| 10414734 | Gm13959                                                   | N/A | N/A |
| 10414736 | ---                                                       | N/A | N/A |
| 10414738 | LOC547323                                                 | N/A | N/A |
| 10414741 | Gm8736 /// Gm8800                                         | N/A | N/A |
| 10414744 | Gm13970                                                   | N/A | N/A |
| 10414751 | Trav13n-1 /// Trav13-3 /// Gm13978 /// Gm6033 /// Gm17006 | N/A | N/A |
| 10414757 | Gm13979 /// Gm16591                                       | N/A | N/A |
| 10414767 | Rps19 /// Rps19-ps3 /// Gm6636                            | N/A | N/A |
| 10414769 | Tcra-V8                                                   | N/A | N/A |
| 10414772 | Tcra-V8 /// Gm10890                                       | N/A | N/A |
| 10414775 | Trav13d-4 /// Gm6033 /// Gm17006                          | N/A | N/A |
| 10414781 | Gm10891 /// Gm13926                                       | N/A | N/A |
| 10414784 | Gm26                                                      | N/A | N/A |
| 10414790 | ---                                                       | N/A | N/A |
| 10414793 | C920008G01Rik                                             | N/A | N/A |
| 10414796 | ---                                                       | N/A | N/A |
| 10414805 | Trav13d-4                                                 | N/A | N/A |
| 10414814 | Gm1220 /// Gm13969                                        | N/A | N/A |
| 10414863 | Gm13979 /// Gm16591                                       | N/A | N/A |
| 10414874 | Rps19 /// Rps19-ps3 /// Gm6636                            | N/A | N/A |
| 10414876 | Tcra-V8                                                   | N/A | N/A |
| 10414879 | Tcra-V8 /// Gm10890                                       | N/A | N/A |
| 10414882 | Trav13d-4 /// Gm6033 /// Gm17006                          | N/A | N/A |
| 10414888 | Gm10891 /// Gm13926                                       | N/A | N/A |
| 10414891 | A130082M07Rik /// LOC547323                               | N/A | N/A |
| 10414894 | Gm26                                                      | N/A | N/A |
| 10414900 | ---                                                       | N/A | N/A |
| 10414903 | Gm10893 /// C920008G01Rik                                 | N/A | N/A |
| 10414906 | Gm13978                                                   | N/A | N/A |
| 10414911 | Trav13n-1 /// Trav13-3 /// Gm13978 /// Gm17006            | N/A | N/A |
| 10414917 | ---                                                       | N/A | N/A |
| 10414923 | Gm13955                                                   | N/A | N/A |
| 10414926 | ---                                                       | N/A | N/A |
| 10414929 | Gm13949 /// Gm7174 /// Gm13959                            | N/A | N/A |
| 10414932 | ---                                                       | N/A | N/A |
| 10414934 | LOC547323                                                 | N/A | N/A |
| 10414955 | A130082M07Rik /// LOC547323                               | N/A | N/A |
| 10414960 | Trav13d-4 /// Gm6033 /// Gm17006                          | N/A | N/A |
| 10414963 | Gm13926                                                   | N/A | N/A |
| 10414967 | Gm17006                                                   | N/A | N/A |
| 10414978 | Gm13894                                                   | N/A | N/A |
| 10414981 | Gm13893                                                   | N/A | N/A |
| 10414984 | Gm13892                                                   | N/A | N/A |
| 10415011 | ---                                                       | N/A | N/A |
| 10415013 | ---                                                       | N/A | N/A |
| 10415017 | ---                                                       | N/A | N/A |
| 10415019 | ---                                                       | N/A | N/A |
| 10415021 | Abhd4                                                     | N/A | N/A |
| 10415030 | Oxa1l                                                     | N/A | N/A |
| 10415052 | Mmp14                                                     | N/A | N/A |
| 10415065 | Lrp10                                                     | N/A | N/A |
| 10415074 | Rem2                                                      | N/A | N/A |
| 10415081 | ---                                                       | N/A | N/A |
| 10415090 | Cdh24                                                     | N/A | N/A |
| 10415092 | 4930579G18Rik                                             | N/A | N/A |
| 10415095 | Acin1 /// 1700123O20Rik                                   | N/A | N/A |
| 10415119 | Pabpn1                                                    | N/A | N/A |
| 10415132 | Cmtm5                                                     | N/A | N/A |
| 10415228 | Cpne6                                                     | N/A | N/A |
| 10415262 | Dcaf11                                                    | N/A | N/A |
| 10415279 | Fitm1                                                     | N/A | N/A |
| 10415282 | Psme1                                                     | N/A | N/A |
| 10415293 | Rnf31                                                     | N/A | N/A |
| 10415319 | Irf9                                                      | N/A | N/A |
| 10415363 | Gmpr2                                                     | N/A | N/A |
| 10415377 | 2610027L16Rik                                             | N/A | N/A |
| 10415388 | Ltb4r2                                                    | N/A | N/A |
| 10415408 | Nynrin                                                    | N/A | N/A |
| 10415411 | Nynrin                                                    | N/A | N/A |
| 10415413 | Nynrin                                                    | N/A | N/A |
| 10415444 | ---                                                       | N/A | N/A |
| 10415570 | Pspc1 /// Gm10034                                         | N/A | N/A |
| 10415572 | 2410022M11Rik                                             | N/A | N/A |
| 10415574 | Ccni                                                      | N/A | N/A |
| 10415576 | Znym2                                                     | N/A | N/A |
| 10415604 | Gjb2 /// Gm10871                                          | N/A | N/A |
| 10415608 | Ift88                                                     | N/A | N/A |
| 10415640 | Rpl12 /// Snora65                                         | N/A | N/A |
| 10415642 | Sap18                                                     | N/A | N/A |
| 10415645 | Mrp63                                                     | N/A | N/A |

|          |                   |     |     |
|----------|-------------------|-----|-----|
| 10415649 | Zdhc20            | N/A | N/A |
| 10415660 | Rpl13             | N/A | N/A |
| 10415678 | Cab39l            | N/A | N/A |
| 10415693 | Shisa2            | N/A | N/A |
| 10415700 | Mtmr6             | N/A | N/A |
| 10415721 | ---               | N/A | N/A |
| 10415723 | ---               | N/A | N/A |
| 10415725 | Spata13           | N/A | N/A |
| 10415778 | Arl11             | N/A | N/A |
| 10415784 | Trim13            | N/A | N/A |
| 10415787 | Kcnrg             | N/A | N/A |
| 10415804 | ---               | N/A | N/A |
| 10415806 | ---               | N/A | N/A |
| 10415818 | Wdfy2             | N/A | N/A |
| 10415835 | Defb43            | N/A | N/A |
| 10415844 | Ctsb /// Fdft1    | N/A | N/A |
| 10415866 | Xkr6              | N/A | N/A |
| 10415873 | Mir598            | N/A | N/A |
| 10415885 | Sox7              | N/A | N/A |
| 10415888 | Gm10867           | N/A | N/A |
| 10415911 | Kif13b            | N/A | N/A |
| 10415955 | ---               | N/A | N/A |
| 10415957 | ---               | N/A | N/A |
| 10415960 | Ints9             | N/A | N/A |
| 10415991 | Zfp395            | N/A | N/A |
| 10416004 | Zfp395            | N/A | N/A |
| 10416044 | Ccdc25            | N/A | N/A |
| 10416057 | Clu               | N/A | N/A |
| 10416069 | Timm23            | N/A | N/A |
| 10416082 | Trim35            | N/A | N/A |
| 10416090 | Stmn4             | N/A | N/A |
| 10416107 | Gm10032           | N/A | N/A |
| 10416110 | Gm5464            | N/A | N/A |
| 10416112 | Pnma2             | N/A | N/A |
| 10416122 | ---               | N/A | N/A |
| 10416124 | ---               | N/A | N/A |
| 10416153 | Gm10861           | N/A | N/A |
| 10416155 | Kctd9             | N/A | N/A |
| 10416169 | Gnrh1             | N/A | N/A |
| 10416175 | Nefl              | N/A | N/A |
| 10416181 | Stc1              | N/A | N/A |
| 10416187 | Rps2 /// Rps2-ps6 | N/A | N/A |
| 10416251 | Egr3              | N/A | N/A |
| 10416256 | Bin3              | N/A | N/A |
| 10416269 | ---               | N/A | N/A |
| 10416271 | Mir320            | N/A | N/A |
| 10416273 | Phyhip            | N/A | N/A |
| 10416279 | Lgi3              | N/A | N/A |
| 10416290 | Reep4             | N/A | N/A |
| 10416332 | Fam160b2          | N/A | N/A |
| 10416340 | Gfra2             | N/A | N/A |
| 10416353 | ---               | N/A | N/A |
| 10416355 | Rcbtb2            | N/A | N/A |
| 10416371 | Lpar6             | N/A | N/A |
| 10416379 | Sucla2            | N/A | N/A |
| 10416406 | Htr2a             | N/A | N/A |
| 10416411 | Esd               | N/A | N/A |
| 10416419 | Gm10847           | N/A | N/A |
| 10416421 | Lrch1             | N/A | N/A |
| 10416437 | Lcp1              | N/A | N/A |
| 10416464 | Zc3h13            | N/A | N/A |
| 10416485 | Siah3             | N/A | N/A |
| 10416496 | Tpt1 /// Tpt1p    | N/A | N/A |
| 10416503 | Snora31           | N/A | N/A |
| 10416510 | Nufip1            | N/A | N/A |
| 10416522 | Tsc22d1           | N/A | N/A |
| 10416531 | ---               | N/A | N/A |
| 10416533 | Ccdc122           | N/A | N/A |
| 10416541 | Enox1             | N/A | N/A |
| 10416588 | 1300010F03Rik     | N/A | N/A |
| 10416653 | Kbtbd7            | N/A | N/A |
| 10416655 | Gm5465            | N/A | N/A |
| 10416657 | Elf1              | N/A | N/A |
| 10416666 | Sugt1             | N/A | N/A |
| 10416680 | Pcdh8 /// Gm9748  | N/A | N/A |
| 10416696 | LOC280487         | N/A | N/A |
| 10416698 | LOC280487         | N/A | N/A |
| 10416700 | Pcdh17            | N/A | N/A |
| 10416725 | ---               | N/A | N/A |
| 10416730 | ---               | N/A | N/A |
| 10416732 | Snora30           | N/A | N/A |
| 10416734 | ---               | N/A | N/A |
| 10416785 | ---               | N/A | N/A |
| 10416791 | ---               | N/A | N/A |

|          |                                                                                       |     |     |
|----------|---------------------------------------------------------------------------------------|-----|-----|
| 10416793 | Uchl3                                                                                 | N/A | N/A |
| 10416835 | Rpl17 /// Gm10268 /// Rpl17-ps3                                                       | N/A | N/A |
| 10416843 | Cln5                                                                                  | N/A | N/A |
| 10416848 | ---                                                                                   | N/A | N/A |
| 10416887 | Slain1                                                                                | N/A | N/A |
| 10416915 | Rpl41                                                                                 | N/A | N/A |
| 10416917 | Trim52                                                                                | N/A | N/A |
| 10416919 | Gm6219 /// Gm6280                                                                     | N/A | N/A |
| 10416923 | ---                                                                                   | N/A | N/A |
| 10416925 | ---                                                                                   | N/A | N/A |
| 10416927 | ---                                                                                   | N/A | N/A |
| 10416929 | Gm6219 /// Gm6280                                                                     | N/A | N/A |
| 10416931 | Slitrk5                                                                               | N/A | N/A |
| 10416938 | Gm4822                                                                                | N/A | N/A |
| 10416940 | Tpm3                                                                                  | N/A | N/A |
| 10416942 | ---                                                                                   | N/A | N/A |
| 10416948 | Mir17                                                                                 | N/A | N/A |
| 10416950 | Mir18                                                                                 | N/A | N/A |
| 10416956 | Mir19b-1                                                                              | N/A | N/A |
| 10416958 | Mir92-1 /// Mir17hg                                                                   | N/A | N/A |
| 10416960 | Gpc5                                                                                  | N/A | N/A |
| 10416974 | Gpc6                                                                                  | N/A | N/A |
| 10416989 | Gpr180                                                                                | N/A | N/A |
| 10417000 | ---                                                                                   | N/A | N/A |
| 10417002 | A830021K08Rik                                                                         | N/A | N/A |
| 10417004 | Dzip1 /// Cldn10                                                                      | N/A | N/A |
| 10417013 | Dnajc3                                                                                | N/A | N/A |
| 10417027 | Cldn10                                                                                | N/A | N/A |
| 10417034 | Dnajc3                                                                                | N/A | N/A |
| 10417048 | Hs6st3                                                                                | N/A | N/A |
| 10417065 | Rap2a                                                                                 | N/A | N/A |
| 10417068 | ---                                                                                   | N/A | N/A |
| 10417070 | Ipo5                                                                                  | N/A | N/A |
| 10417095 | Farp1                                                                                 | N/A | N/A |
| 10417124 | B930095G15Rik                                                                         | N/A | N/A |
| 10417128 | ---                                                                                   | N/A | N/A |
| 10417130 | Ubac2                                                                                 | N/A | N/A |
| 10417147 | Tm9sf2                                                                                | N/A | N/A |
| 10417167 | Clybl                                                                                 | N/A | N/A |
| 10417181 | Gm10837                                                                               | N/A | N/A |
| 10417183 | Pcca                                                                                  | N/A | N/A |
| 10417208 | Tmtc4                                                                                 | N/A | N/A |
| 10417235 | Gm3373                                                                                | N/A | N/A |
| 10417245 | Gm1973                                                                                | N/A | N/A |
| 10417253 | Gm1973 /// Gm10338                                                                    | N/A | N/A |
| 10417258 | Gm8348                                                                                | N/A | N/A |
| 10417264 | Gm3373                                                                                | N/A | N/A |
| 10417273 | Esd                                                                                   | N/A | N/A |
| 10417275 | ---                                                                                   | N/A | N/A |
| 10417281 | Gm1973                                                                                | N/A | N/A |
| 10417302 | Gm3373                                                                                | N/A | N/A |
| 10417315 | Gm3373                                                                                | N/A | N/A |
| 10417319 | D830030K20Rik /// Gm3033 /// Gm3030 /// Gm3278 /// LOC100504200 /// Gm8050 /// Gm1973 | N/A | N/A |
| 10417359 | Gm3373                                                                                | N/A | N/A |
| 10417366 | Gm10406 /// ENSMUSG0000068790 /// Gm8348 /// Gm2897 /// Gm10409                       | N/A | N/A |
| 10417371 | Gm3696 /// Gm2897                                                                     | N/A | N/A |
| 10417403 | 1700110I01Rik /// Gm8160                                                              | N/A | N/A |
| 10417411 | Gm3373                                                                                | N/A | N/A |
| 10417421 | Gm3468                                                                                | N/A | N/A |
| 10417446 | 4930555G01Rik /// Gm2897 /// Gm3099                                                   | N/A | N/A |
| 10417452 | 4930555G01Rik /// Gm2897 /// Gm3099                                                   | N/A | N/A |
| 10417461 | Gm3558                                                                                | N/A | N/A |
| 10417492 | Gm5458                                                                                | N/A | N/A |
| 10417498 | 1700110I01Rik /// Gm8160                                                              | N/A | N/A |
| 10417504 | Gm1973 /// LOC100041151 /// Gm5797 /// Gm3149 /// Gm10338 /// Gm5458                  | N/A | N/A |
| 10417526 | Dnase1l3                                                                              | N/A | N/A |
| 10417538 | Pdhb                                                                                  | N/A | N/A |
| 10417544 | Acox2                                                                                 | N/A | N/A |
| 10417561 | Fam107a                                                                               | N/A | N/A |
| 10417599 | ---                                                                                   | N/A | N/A |
| 10417617 | Gapdh /// Gm3839 /// Gm16374 /// Gm2606 /// Gm4609 /// Gm3200 /// Gm2451 /// Gm10293  | N/A | N/A |
| 10417628 | Cadps                                                                                 | N/A | N/A |
| 10417676 | Thoc7                                                                                 | N/A | N/A |
| 10417698 | Olfir720                                                                              | N/A | N/A |
| 10417700 | ---                                                                                   | N/A | N/A |
| 10417702 | ---                                                                                   | N/A | N/A |
| 10417704 | Lrrc3b                                                                                | N/A | N/A |
| 10417708 | Oxsm                                                                                  | N/A | N/A |
| 10417728 | ---                                                                                   | N/A | N/A |
| 10417730 | ---                                                                                   | N/A | N/A |
| 10417732 | ---                                                                                   | N/A | N/A |
| 10417745 | Rpl15 /// Gm4294                                                                      | N/A | N/A |
| 10417749 | Ube2e1 /// Nkiras1                                                                    | N/A | N/A |
| 10417757 | Vps4b                                                                                 | N/A | N/A |

|          |                                                                                     |     |     |
|----------|-------------------------------------------------------------------------------------|-----|-----|
| 10417759 | Ube2e2                                                                              | N/A | N/A |
| 10417769 | Gm3696                                                                              | N/A | N/A |
| 10417773 | Gm5458 /// Gm5797 /// Gm3047 /// Gm8159 /// Gm3453 /// Gm3476 /// Gm3149 /// Gm3642 | N/A | N/A |
| 10417778 | 2700060E02Rik /// Nid2                                                              | N/A | N/A |
| 10417787 | Gng2                                                                                | N/A | N/A |
| 10417794 | 1810063B07Rik                                                                       | N/A | N/A |
| 10417798 | Kcnk5                                                                               | N/A | N/A |
| 10417813 | Ecd                                                                                 | N/A | N/A |
| 10417829 | Dnajc9                                                                              | N/A | N/A |
| 10417836 | Mrps16                                                                              | N/A | N/A |
| 10417869 | Anxa7                                                                               | N/A | N/A |
| 10417887 | Zmynd17                                                                             | N/A | N/A |
| 10417895 | Ppp3cb                                                                              | N/A | N/A |
| 10417912 | Usp54                                                                               | N/A | N/A |
| 10417920 | Usp54                                                                               | N/A | N/A |
| 10417946 | Sec24c /// 6230400D17Rik                                                            | N/A | N/A |
| 10417950 | Ndst2                                                                               | N/A | N/A |
| 10417972 | Camk2g                                                                              | N/A | N/A |
| 10418002 | ---                                                                                 | N/A | N/A |
| 10418004 | Ap3m1                                                                               | N/A | N/A |
| 10418053 | Kcnma1                                                                              | N/A | N/A |
| 10418096 | Dlg5                                                                                | N/A | N/A |
| 10418129 | ---                                                                                 | N/A | N/A |
| 10418131 | Polr3a                                                                              | N/A | N/A |
| 10418167 | Ppif /// Ppifos                                                                     | N/A | N/A |
| 10418169 | 1700054019Rik                                                                       | N/A | N/A |
| 10418171 | Zcchc24                                                                             | N/A | N/A |
| 10418177 | Anxa11 /// Gm9872                                                                   | N/A | N/A |
| 10418185 | D14Erd449e                                                                          | N/A | N/A |
| 10418198 | D14Erd449e                                                                          | N/A | N/A |
| 10418210 | D14Erd449e                                                                          | N/A | N/A |
| 10418218 | Simap                                                                               | N/A | N/A |
| 10418244 | Fam116a                                                                             | N/A | N/A |
| 10418247 | Pde12                                                                               | N/A | N/A |
| 10418251 | Appl1                                                                               | N/A | N/A |
| 10418275 | Ccdc66 /// D14Abb1e                                                                 | N/A | N/A |
| 10418295 | ---                                                                                 | N/A | N/A |
| 10418300 | Cacna2d3                                                                            | N/A | N/A |
| 10418339 | Gm10245                                                                             | N/A | N/A |
| 10418434 | Itih3                                                                               | N/A | N/A |
| 10418455 | Itih1                                                                               | N/A | N/A |
| 10418480 | Gnl3                                                                                | N/A | N/A |
| 10418498 | Rpl7a                                                                               | N/A | N/A |
| 10418500 | 2010107H07Rik                                                                       | N/A | N/A |
| 10418578 | Nisch                                                                               | N/A | N/A |
| 10418604 | Phf7                                                                                | N/A | N/A |
| 10418718 | ---                                                                                 | N/A | N/A |
| 10418747 | Hac1                                                                                | N/A | N/A |
| 10418766 | Ankrd28                                                                             | N/A | N/A |
| 10418796 | Dph3                                                                                | N/A | N/A |
| 10418804 | Timm23                                                                              | N/A | N/A |
| 10418835 | Slc18a3                                                                             | N/A | N/A |
| 10418846 | 3425401B19Rik                                                                       | N/A | N/A |
| 10418879 | Mapk8                                                                               | N/A | N/A |
| 10418895 | Zfp488                                                                              | N/A | N/A |
| 10418901 | Gprin2                                                                              | N/A | N/A |
| 10418903 | Gprin2                                                                              | N/A | N/A |
| 10418905 | Fam35a                                                                              | N/A | N/A |
| 10418917 | 2200001115Rik                                                                       | N/A | N/A |
| 10418921 | Sncg                                                                                | N/A | N/A |
| 10418927 | Bmpr1a                                                                              | N/A | N/A |
| 10418982 | 4930596D02Rik                                                                       | N/A | N/A |
| 10418989 | ---                                                                                 | N/A | N/A |
| 10418991 | Gcap14                                                                              | N/A | N/A |
| 10419034 | 2610528A11Rik                                                                       | N/A | N/A |
| 10419038 | Ghitm                                                                               | N/A | N/A |
| 10419049 | Nrg3                                                                                | N/A | N/A |
| 10419060 | ---                                                                                 | N/A | N/A |
| 10419073 | Tspan14                                                                             | N/A | N/A |
| 10419089 | Dydc2                                                                               | N/A | N/A |
| 10419108 | Gm9890                                                                              | N/A | N/A |
| 10419116 | 1700001F09Rik /// Gm10375 /// Gm3543 /// Gm3676                                     | N/A | N/A |
| 10419119 | Gm8165                                                                              | N/A | N/A |
| 10419122 | Gm8165                                                                              | N/A | N/A |
| 10419125 | 1700091H14Rik /// Gm8005                                                            | N/A | N/A |
| 10419136 | Cdv3                                                                                | N/A | N/A |
| 10419154 | Ear2                                                                                | N/A | N/A |
| 10419156 | Ear2                                                                                | N/A | N/A |
| 10419160 | ---                                                                                 | N/A | N/A |
| 10419167 | Ptgdr                                                                               | N/A | N/A |
| 10419170 | Txndc16                                                                             | N/A | N/A |
| 10419198 | Ero1l                                                                               | N/A | N/A |
| 10419216 | Gnpnat1 /// Styx                                                                    | N/A | N/A |
| 10419240 | Dhd1                                                                                | N/A | N/A |

|          |                          |     |     |
|----------|--------------------------|-----|-----|
| 10419261 | Bmp4                     | N/A | N/A |
| 10419267 | Cnih                     | N/A | N/A |
| 10419274 | Gmfb                     | N/A | N/A |
| 10419284 | Gm10101                  | N/A | N/A |
| 10419286 | ---                      | N/A | N/A |
| 10419288 | Gch1                     | N/A | N/A |
| 10419296 | Wdhd1                    | N/A | N/A |
| 10419321 | ---                      | N/A | N/A |
| 10419343 | Atg14                    | N/A | N/A |
| 10419354 | Map1lc3b                 | N/A | N/A |
| 10419366 | Gm534                    | N/A | N/A |
| 10419368 | ---                      | N/A | N/A |
| 10419370 | Exoc5                    | N/A | N/A |
| 10419390 | ---                      | N/A | N/A |
| 10419399 | Slc35f4                  | N/A | N/A |
| 10419414 | ---                      | N/A | N/A |
| 10419416 | 3632451006Rik            | N/A | N/A |
| 10419429 | Olf724 /// Olf723        | N/A | N/A |
| 10419435 | Olf725                   | N/A | N/A |
| 10419438 | Olf726                   | N/A | N/A |
| 10419440 | Olf728                   | N/A | N/A |
| 10419442 | Olf729                   | N/A | N/A |
| 10419444 | Olf730                   | N/A | N/A |
| 10419448 | Olf732                   | N/A | N/A |
| 10419450 | Olf733                   | N/A | N/A |
| 10419452 | Olf734                   | N/A | N/A |
| 10419454 | Olf735                   | N/A | N/A |
| 10419460 | Ttc5                     | N/A | N/A |
| 10419469 | ---                      | N/A | N/A |
| 10419532 | Oseep                    | N/A | N/A |
| 10419542 | Tmem55b /// Apex1        | N/A | N/A |
| 10419557 | Rnase11                  | N/A | N/A |
| 10419559 | Rnase12                  | N/A | N/A |
| 10419561 | Olf750                   | N/A | N/A |
| 10419563 | Rnase1                   | N/A | N/A |
| 10419566 | Ang2                     | N/A | N/A |
| 10419578 | Ndrp2                    | N/A | N/A |
| 10419594 | Rnase13                  | N/A | N/A |
| 10419596 | Zfp219                   | N/A | N/A |
| 10419604 | Olf221                   | N/A | N/A |
| 10419607 | Hnrnp1                   | N/A | N/A |
| 10419611 | Supt16h /// Rpgr1        | N/A | N/A |
| 10419638 | Chd8                     | N/A | N/A |
| 10419674 | Snord8                   | N/A | N/A |
| 10419676 | Rab2b                    | N/A | N/A |
| 10419691 | Mettl3 /// Tox4          | N/A | N/A |
| 10419711 | Psm3                     | N/A | N/A |
| 10419713 | Olf1512                  | N/A | N/A |
| 10419715 | Olf1510 /// Olf1511      | N/A | N/A |
| 10419717 | Olf1510                  | N/A | N/A |
| 10419729 | Nrbf2                    | N/A | N/A |
| 10419731 | Nrbf2                    | N/A | N/A |
| 10419736 | Dad1                     | N/A | N/A |
| 10419742 | Olf49                    | N/A | N/A |
| 10419757 | Gm10366                  | N/A | N/A |
| 10419759 | Prmt5                    | N/A | N/A |
| 10419779 | Haus4                    | N/A | N/A |
| 10419803 | 4931414P19Rik            | N/A | N/A |
| 10419810 | Psm5                     | N/A | N/A |
| 10419814 | Cdh24                    | N/A | N/A |
| 10419825 | Acin1                    | N/A | N/A |
| 10419850 | Cebpe                    | N/A | N/A |
| 10419854 | Slc7a8                   | N/A | N/A |
| 10419867 | Homez                    | N/A | N/A |
| 10419872 | Ppp1r3e                  | N/A | N/A |
| 10419874 | Slc22a17                 | N/A | N/A |
| 10419932 | Mir208a                  | N/A | N/A |
| 10419966 | Zfhx2 /// Zfhx2as        | N/A | N/A |
| 10420011 | Myl6 /// Gm8894          | N/A | N/A |
| 10420019 | Gm10876                  | N/A | N/A |
| 10420021 | Dcaf11 /// A730061H03Rik | N/A | N/A |
| 10420023 | Fam158a                  | N/A | N/A |
| 10420030 | Psm2                     | N/A | N/A |
| 10420080 | Mdp1                     | N/A | N/A |
| 10420089 | Nedd8                    | N/A | N/A |
| 10420114 | Tgm1                     | N/A | N/A |
| 10420131 | Rabggta                  | N/A | N/A |
| 10420155 | Dhrs1                    | N/A | N/A |
| 10420165 | Cideb                    | N/A | N/A |
| 10420216 | Sdr39u1                  | N/A | N/A |
| 10420237 | Ube2j2 /// Gm5801        | N/A | N/A |
| 10420316 | Atp12a /// Gm10873       | N/A | N/A |
| 10420338 | Pspc1 /// Gm10034        | N/A | N/A |
| 10420348 | Zmym5                    | N/A | N/A |

|          |                               |     |     |
|----------|-------------------------------|-----|-----|
| 10420359 | Gja3                          | N/A | N/A |
| 10420362 | Gjb2 /// Gm10871              | N/A | N/A |
| 10420366 | Gjb6                          | N/A | N/A |
| 10420372 | Cryl1                         | N/A | N/A |
| 10420383 | AU040096                      | N/A | N/A |
| 10420385 | N6amt2                        | N/A | N/A |
| 10420390 | Xpo4                          | N/A | N/A |
| 10420413 | Lats2                         | N/A | N/A |
| 10420437 | Zdhhc20                       | N/A | N/A |
| 10420439 | Zdhhc20                       | N/A | N/A |
| 10420457 | Efha1                         | N/A | N/A |
| 10420470 | ---                           | N/A | N/A |
| 10420503 | Setdb2                        | N/A | N/A |
| 10420516 | Cdadcl                        | N/A | N/A |
| 10420532 | Atp8a2                        | N/A | N/A |
| 10420572 | Nupl1 /// Mir719              | N/A | N/A |
| 10420589 | Fam123a /// Gm10235           | N/A | N/A |
| 10420591 | ---                           | N/A | N/A |
| 10420594 | C1qtnf9                       | N/A | N/A |
| 10420614 | Sacs                          | N/A | N/A |
| 10420628 | ---                           | N/A | N/A |
| 10420631 | Ebpl                          | N/A | N/A |
| 10420637 | Kpna3                         | N/A | N/A |
| 10420659 | 6330409N04Rik                 | N/A | N/A |
| 10420666 | Mir16-1                       | N/A | N/A |
| 10420668 | Mir15a                        | N/A | N/A |
| 10420670 | Dleu2                         | N/A | N/A |
| 10420672 | Dleu7                         | N/A | N/A |
| 10420724 | Defb30                        | N/A | N/A |
| 10420730 | Fdft1 /// Ctsb                | N/A | N/A |
| 10420747 | Gata4                         | N/A | N/A |
| 10420785 | Mtmr9                         | N/A | N/A |
| 10420787 | Mtmr9                         | N/A | N/A |
| 10420823 | Hmbox1                        | N/A | N/A |
| 10420837 | Extl3                         | N/A | N/A |
| 10420846 | Fzd3                          | N/A | N/A |
| 10420860 | Elp3                          | N/A | N/A |
| 10420889 | 1110020C17Rik                 | N/A | N/A |
| 10420899 | Gulo                          | N/A | N/A |
| 10420935 | Ephx2                         | N/A | N/A |
| 10420957 | Ptk2b                         | N/A | N/A |
| 10420986 | Rpl21-ps10                    | N/A | N/A |
| 10420988 | Dpysl2                        | N/A | N/A |
| 10421026 | Ebf2 /// Gm10860              | N/A | N/A |
| 10421046 | Dock5                         | N/A | N/A |
| 10421172 | Slc25a37                      | N/A | N/A |
| 10421184 | Loxl2 /// Gm10325             | N/A | N/A |
| 10421197 | Chmp7                         | N/A | N/A |
| 10421212 | ---                           | N/A | N/A |
| 10421214 | Rhobtb2                       | N/A | N/A |
| 10421227 | 2610301G19Rik                 | N/A | N/A |
| 10421269 | Sorbs3                        | N/A | N/A |
| 10421309 | Slc39a14                      | N/A | N/A |
| 10421351 | Polr3d                        | N/A | N/A |
| 10421361 | Bmp1                          | N/A | N/A |
| 10421418 | Epb4.9                        | N/A | N/A |
| 10421486 | F630201L12Rik                 | N/A | N/A |
| 10421488 | Fndc3a                        | N/A | N/A |
| 10421515 | ---                           | N/A | N/A |
| 10421524 | ---                           | N/A | N/A |
| 10421526 | Rb1                           | N/A | N/A |
| 10421555 | Mir687                        | N/A | N/A |
| 10421557 | Itm2b                         | N/A | N/A |
| 10421571 | Rps6 /// Rps6-ps2 /// Gm16409 | N/A | N/A |
| 10421573 | Cbx3 /// Gm6901               | N/A | N/A |
| 10421577 | Gm9779                        | N/A | N/A |
| 10421581 | Lrch1                         | N/A | N/A |
| 10421622 | ---                           | N/A | N/A |
| 10421624 | Cog3                          | N/A | N/A |
| 10421648 | Slc25a30                      | N/A | N/A |
| 10421661 | Gtf2f2                        | N/A | N/A |
| 10421670 | ---                           | N/A | N/A |
| 10421672 | 120001118Rik                  | N/A | N/A |
| 10421683 | Rps2 /// Rps2-ps6             | N/A | N/A |
| 10421694 | ---                           | N/A | N/A |
| 10421697 | 9030625A04Rik                 | N/A | N/A |
| 10421723 | Dnajc15                       | N/A | N/A |
| 10421749 | Akap11                        | N/A | N/A |
| 10421758 | Akap11                        | N/A | N/A |
| 10421768 | Akap11                        | N/A | N/A |
| 10421774 | Dgkh                          | N/A | N/A |
| 10421817 | Naa16                         | N/A | N/A |
| 10421840 | Wbp4                          | N/A | N/A |
| 10421863 | Pcdh8                         | N/A | N/A |

|          |                                  |     |     |
|----------|----------------------------------|-----|-----|
| 10421870 | Gm10845                          | N/A | N/A |
| 10421873 | ---                              | N/A | N/A |
| 10421875 | ---                              | N/A | N/A |
| 10421906 | ---                              | N/A | N/A |
| 10421911 | Pcdh20                           | N/A | N/A |
| 10421917 | Pabpc4                           | N/A | N/A |
| 10421920 | ---                              | N/A | N/A |
| 10421922 | ---                              | N/A | N/A |
| 10421924 | Pcdh9                            | N/A | N/A |
| 10421930 | ---                              | N/A | N/A |
| 10421932 | Pcdh9                            | N/A | N/A |
| 10421934 | Klhl1                            | N/A | N/A |
| 10421970 | ---                              | N/A | N/A |
| 10421972 | Rpl36a                           | N/A | N/A |
| 10421981 | Dis3 /// Pibf1                   | N/A | N/A |
| 10422005 | ---                              | N/A | N/A |
| 10422007 | ---                              | N/A | N/A |
| 10422009 | ---                              | N/A | N/A |
| 10422011 | ---                              | N/A | N/A |
| 10422013 | Klf12                            | N/A | N/A |
| 10422022 | Gm10843                          | N/A | N/A |
| 10422024 | ---                              | N/A | N/A |
| 10422026 | 1700110M21Rik                    | N/A | N/A |
| 10422028 | Tbc1d4                           | N/A | N/A |
| 10422052 | Commmd6                          | N/A | N/A |
| 10422055 | Gm9922                           | N/A | N/A |
| 10422057 | Rpl7a /// Gm16477 /// Rpl7a-ps10 | N/A | N/A |
| 10422075 | Mycbp2                           | N/A | N/A |
| 10422161 | Gm10293                          | N/A | N/A |
| 10422164 | Ednrb                            | N/A | N/A |
| 10422176 | D130079A08Rik                    | N/A | N/A |
| 10422185 | Rnf219                           | N/A | N/A |
| 10422194 | Rbm26                            | N/A | N/A |
| 10422225 | ---                              | N/A | N/A |
| 10422227 | Spry2                            | N/A | N/A |
| 10422232 | Gm6219 /// Gm6280                | N/A | N/A |
| 10422234 | ---                              | N/A | N/A |
| 10422236 | ---                              | N/A | N/A |
| 10422238 | Rpl27a-ps2                       | N/A | N/A |
| 10422240 | Slitrk1                          | N/A | N/A |
| 10422244 | Slitrk6                          | N/A | N/A |
| 10422247 | LOC280487                        | N/A | N/A |
| 10422272 | Sox21                            | N/A | N/A |
| 10422321 | Dzip1                            | N/A | N/A |
| 10422348 | Uggt2                            | N/A | N/A |
| 10422393 | ---                              | N/A | N/A |
| 10422396 | Stk24                            | N/A | N/A |
| 10422436 | Dock9                            | N/A | N/A |
| 10422493 | Gpr18                            | N/A | N/A |
| 10422496 | Gpr183                           | N/A | N/A |
| 10422504 | Zic5                             | N/A | N/A |
| 10422509 | ---                              | N/A | N/A |
| 10422512 | A2ld1                            | N/A | N/A |
| 10422518 | Tmtc4                            | N/A | N/A |
| 10422537 | Nalcn                            | N/A | N/A |
| 10422585 | Fgf14                            | N/A | N/A |
| 10422598 | Sepp1                            | N/A | N/A |
| 10422606 | Fbxo4                            | N/A | N/A |
| 10422608 | Oxt1                             | N/A | N/A |
| 10422635 | C6                               | N/A | N/A |
| 10422655 | Gapdh                            | N/A | N/A |
| 10422699 | ---                              | N/A | N/A |
| 10422701 | Rpl37                            | N/A | N/A |
| 10422707 | Prkaa1                           | N/A | N/A |
| 10422718 | Ttc33                            | N/A | N/A |
| 10422725 | ---                              | N/A | N/A |
| 10422728 | Dab2                             | N/A | N/A |
| 10422748 | C9                               | N/A | N/A |
| 10422776 | Phb                              | N/A | N/A |
| 10422781 | Rictor                           | N/A | N/A |
| 10422822 | Lifr                             | N/A | N/A |
| 10422854 | Nup155                           | N/A | N/A |
| 10422892 | 2410089E03Rik                    | N/A | N/A |
| 10422912 | 2410089E03Rik                    | N/A | N/A |
| 10422942 | ---                              | N/A | N/A |
| 10422944 | ---                              | N/A | N/A |
| 10422962 | 1110020G09Rik                    | N/A | N/A |
| 10422980 | Lmbrd2                           | N/A | N/A |
| 10423002 | Ugt3a2 /// Ugt3a1                | N/A | N/A |
| 10423005 | Ugt3a1                           | N/A | N/A |
| 10423011 | Ugt3a2                           | N/A | N/A |
| 10423030 | Prlr                             | N/A | N/A |
| 10423049 | Prlr                             | N/A | N/A |
| 10423053 | Agxt2 /// Prlr                   | N/A | N/A |



|          |                                                                                       |     |     |
|----------|---------------------------------------------------------------------------------------|-----|-----|
| 10423068 | Rad1                                                                                  | N/A | N/A |
| 10423078 | Gm10389                                                                               | N/A | N/A |
| 10423090 | Amacr                                                                                 | N/A | N/A |
| 10423134 | Zfr                                                                                   | N/A | N/A |
| 10423172 | Golph3                                                                                | N/A | N/A |
| 10423180 | Gapdh /// Gm12070 /// Gm16374 /// Gm2606 /// Gm4609 /// Gm3200 /// Gm2451 /// Gm10293 | N/A | N/A |
| 10423185 | Rnasen                                                                                | N/A | N/A |
| 10423228 | Nsa2                                                                                  | N/A | N/A |
| 10423243 | Cdh10                                                                                 | N/A | N/A |
| 10423258 | Cdh12                                                                                 | N/A | N/A |
| 10423271 | ---                                                                                   | N/A | N/A |
| 10423274 | Cdh18                                                                                 | N/A | N/A |
| 10423287 | Cdh18                                                                                 | N/A | N/A |
| 10423289 | ---                                                                                   | N/A | N/A |
| 10423291 | Gm5468                                                                                | N/A | N/A |
| 10423293 | Myo10                                                                                 | N/A | N/A |
| 10423333 | Fam134b                                                                               | N/A | N/A |
| 10423346 | Zfp622                                                                                | N/A | N/A |
| 10423355 | March11                                                                               | N/A | N/A |
| 10423358 | March11                                                                               | N/A | N/A |
| 10423361 | Rps2 /// Rps2-ps6 /// Gm5921 /// Gm6139                                               | N/A | N/A |
| 10423363 | Ank                                                                                   | N/A | N/A |
| 10423379 | Tiaf2                                                                                 | N/A | N/A |
| 10423383 | ---                                                                                   | N/A | N/A |
| 10423386 | Gm9891                                                                                | N/A | N/A |
| 10423471 | Ctnnd2                                                                                | N/A | N/A |
| 10423498 | Dap                                                                                   | N/A | N/A |
| 10423503 | Gm6624                                                                                | N/A | N/A |
| 10423505 | Cmb1                                                                                  | N/A | N/A |
| 10423518 | Tas2r119                                                                              | N/A | N/A |
| 10423520 | Sema5a                                                                                | N/A | N/A |
| 10423548 | Sdc2                                                                                  | N/A | N/A |
| 10423556 | Pgcp                                                                                  | N/A | N/A |
| 10423568 | 5730407107Rik                                                                         | N/A | N/A |
| 10423570 | ---                                                                                   | N/A | N/A |
| 10423575 | ---                                                                                   | N/A | N/A |
| 10423577 | Mtdh                                                                                  | N/A | N/A |
| 10423593 | Laptm4b                                                                               | N/A | N/A |
| 10423599 | Matn2                                                                                 | N/A | N/A |
| 10423663 | Vps13b                                                                                | N/A | N/A |
| 10423731 | ---                                                                                   | N/A | N/A |
| 10423733 | ---                                                                                   | N/A | N/A |
| 10423740 | ---                                                                                   | N/A | N/A |
| 10423742 | Polr2k                                                                                | N/A | N/A |
| 10423768 | Gm10385                                                                               | N/A | N/A |
| 10423791 | 4930447A16Rik                                                                         | N/A | N/A |
| 10423796 | ---                                                                                   | N/A | N/A |
| 10423803 | ---                                                                                   | N/A | N/A |
| 10423805 | Atp6v1c1                                                                              | N/A | N/A |
| 10423821 | Baalc                                                                                 | N/A | N/A |
| 10423842 | Dcaf13 /// Slc25a32                                                                   | N/A | N/A |
| 10423855 | Rims2                                                                                 | N/A | N/A |
| 10423917 | ---                                                                                   | N/A | N/A |
| 10423919 | 4930555K19Rik                                                                         | N/A | N/A |
| 10423921 | Oxr1                                                                                  | N/A | N/A |
| 10423941 | Ttc35                                                                                 | N/A | N/A |
| 10423951 | ---                                                                                   | N/A | N/A |
| 10423953 | Trhr                                                                                  | N/A | N/A |
| 10423963 | Nudcd1 /// Eny2                                                                       | N/A | N/A |
| 10424060 | A930017M01Rik                                                                         | N/A | N/A |
| 10424062 | A930017M01Rik                                                                         | N/A | N/A |
| 10424070 | Ewsr1                                                                                 | N/A | N/A |
| 10424075 | ---                                                                                   | N/A | N/A |
| 10424097 | Med30                                                                                 | N/A | N/A |
| 10424102 | Gm7489                                                                                | N/A | N/A |
| 10424105 | Colec10                                                                               | N/A | N/A |
| 10424113 | Mal2                                                                                  | N/A | N/A |
| 10424119 | Nov                                                                                   | N/A | N/A |
| 10424126 | Depdc6                                                                                | N/A | N/A |
| 10424140 | Col14a1                                                                               | N/A | N/A |
| 10424211 | Gm10370                                                                               | N/A | N/A |
| 10424213 | Zhx2                                                                                  | N/A | N/A |
| 10424221 | Wdr67                                                                                 | N/A | N/A |
| 10424250 | Snrp2 /// Gm10120                                                                     | N/A | N/A |
| 10424252 | Wdyhv1                                                                                | N/A | N/A |
| 10424260 | D15Ert621e                                                                            | N/A | N/A |
| 10424335 | Rnf139                                                                                | N/A | N/A |
| 10424340 | Ndufb9                                                                                | N/A | N/A |
| 10424345 | Gm5045                                                                                | N/A | N/A |
| 10424347 | ---                                                                                   | N/A | N/A |
| 10424349 | Sqle                                                                                  | N/A | N/A |
| 10424363 | Nsmce2                                                                                | N/A | N/A |
| 10424370 | Trib1                                                                                 | N/A | N/A |
| 10424377 | LOC280487                                                                             | N/A | N/A |

|          |                                                                                                                        |     |     |
|----------|------------------------------------------------------------------------------------------------------------------------|-----|-----|
| 10424379 | Srsf3                                                                                                                  | N/A | N/A |
| 10424381 | ---                                                                                                                    | N/A | N/A |
| 10424398 | Gm10368                                                                                                                | N/A | N/A |
| 10424400 | Myc                                                                                                                    | N/A | N/A |
| 10424404 | Pvt1                                                                                                                   | N/A | N/A |
| 10424411 | Tsg101                                                                                                                 | N/A | N/A |
| 10424413 | Hmgb1                                                                                                                  | N/A | N/A |
| 10424416 | ---                                                                                                                    | N/A | N/A |
| 10424437 | ---                                                                                                                    | N/A | N/A |
| 10424439 | Efr3a                                                                                                                  | N/A | N/A |
| 10424467 | Phf201                                                                                                                 | N/A | N/A |
| 10424485 | Phf201                                                                                                                 | N/A | N/A |
| 10424553 | Gm6813 /// Gm9104 /// Rpl21-ps4 /// Rpl21-ps7 /// Gm16415 /// Gm16416 /// Rpl21-ps12 /// Rpl21-ps14 /// Rpl21-ps10 /// | N/A | N/A |
| 10424555 | ---                                                                                                                    | N/A | N/A |
| 10424557 | Gm7125                                                                                                                 | N/A | N/A |
| 10424559 | Khdrbs3                                                                                                                | N/A | N/A |
| 10424573 | ---                                                                                                                    | N/A | N/A |
| 10424582 | ---                                                                                                                    | N/A | N/A |
| 10424622 | ---                                                                                                                    | N/A | N/A |
| 10424624 | Bai1                                                                                                                   | N/A | N/A |
| 10424660 | 4933427E11Rik /// Jrk                                                                                                  | N/A | N/A |
| 10424667 | 4930572J05Rik                                                                                                          | N/A | N/A |
| 10424674 | ---                                                                                                                    | N/A | N/A |
| 10424676 | Ly6e                                                                                                                   | N/A | N/A |
| 10424683 | Ly6g                                                                                                                   | N/A | N/A |
| 10424686 | BC025446                                                                                                               | N/A | N/A |
| 10424695 | Gpihbp1                                                                                                                | N/A | N/A |
| 10424779 | Cks2                                                                                                                   | N/A | N/A |
| 10424781 | Grina                                                                                                                  | N/A | N/A |
| 10424810 | Gpaa1                                                                                                                  | N/A | N/A |
| 10424823 | Rps6 /// Gm16409                                                                                                       | N/A | N/A |
| 10424825 | Cyc1                                                                                                                   | N/A | N/A |
| 10424833 | Maf1                                                                                                                   | N/A | N/A |
| 10424853 | Brp16                                                                                                                  | N/A | N/A |
| 10424894 | Heatr7a                                                                                                                | N/A | N/A |
| 10424905 | Scx                                                                                                                    | N/A | N/A |
| 10424909 | Hsf1                                                                                                                   | N/A | N/A |
| 10424922 | Gpr172b                                                                                                                | N/A | N/A |
| 10424929 | Adck5                                                                                                                  | N/A | N/A |
| 10424945 | Kifc2                                                                                                                  | N/A | N/A |
| 10424965 | Ppp1r16a                                                                                                               | N/A | N/A |
| 10424979 | Gpt                                                                                                                    | N/A | N/A |
| 10425000 | Lrrc14                                                                                                                 | N/A | N/A |
| 10425012 | Zfp7                                                                                                                   | N/A | N/A |
| 10425016 | Comm5                                                                                                                  | N/A | N/A |
| 10425018 | Rpl8                                                                                                                   | N/A | N/A |
| 10425024 | 1110038F14Rik                                                                                                          | N/A | N/A |
| 10425046 | ---                                                                                                                    | N/A | N/A |
| 10425049 | Apol9a /// Apol9b                                                                                                      | N/A | N/A |
| 10425076 | ---                                                                                                                    | N/A | N/A |
| 10425078 | Mpst                                                                                                                   | N/A | N/A |
| 10425082 | Kctd17                                                                                                                 | N/A | N/A |
| 10425109 | Elfn2 /// 1700041B01Rik                                                                                                | N/A | N/A |
| 10425114 | Tmed2                                                                                                                  | N/A | N/A |
| 10425116 | Cdc42ep1                                                                                                               | N/A | N/A |
| 10425120 | Gga1                                                                                                                   | N/A | N/A |
| 10425158 | Pdxp                                                                                                                   | N/A | N/A |
| 10425161 | Lgals1                                                                                                                 | N/A | N/A |
| 10425166 | Nol12                                                                                                                  | N/A | N/A |
| 10425207 | H1f0                                                                                                                   | N/A | N/A |
| 10425211 | Gcat                                                                                                                   | N/A | N/A |
| 10425223 | Galr3 /// Gcat                                                                                                         | N/A | N/A |
| 10425226 | Eif3l                                                                                                                  | N/A | N/A |
| 10425257 | Polr2f                                                                                                                 | N/A | N/A |
| 10425263 | Gm10864                                                                                                                | N/A | N/A |
| 10425265 | ---                                                                                                                    | N/A | N/A |
| 10425293 | Cby1                                                                                                                   | N/A | N/A |
| 10425299 | Tomm22                                                                                                                 | N/A | N/A |
| 10425302 | Gtpbp1                                                                                                                 | N/A | N/A |
| 10425317 | ---                                                                                                                    | N/A | N/A |
| 10425319 | Gm10856                                                                                                                | N/A | N/A |
| 10425321 | Apobec3                                                                                                                | N/A | N/A |
| 10425333 | Apobec3                                                                                                                | N/A | N/A |
| 10425335 | Syng1                                                                                                                  | N/A | N/A |
| 10425341 | Tab1                                                                                                                   | N/A | N/A |
| 10425357 | Smcr7l                                                                                                                 | N/A | N/A |
| 10425430 | Trnc6b                                                                                                                 | N/A | N/A |
| 10425461 | Adsl                                                                                                                   | N/A | N/A |
| 10425477 | Sgsm3                                                                                                                  | N/A | N/A |
| 10425501 | ---                                                                                                                    | N/A | N/A |
| 10425507 | Mchr1                                                                                                                  | N/A | N/A |
| 10425511 | Xpnpep3                                                                                                                | N/A | N/A |
| 10425522 | Rbx1                                                                                                                   | N/A | N/A |
| 10425527 | Ep300                                                                                                                  | N/A | N/A |

|          |                                                                 |     |     |
|----------|-----------------------------------------------------------------|-----|-----|
| 10425559 | L3mbt12                                                         | N/A | N/A |
| 10425578 | Zc3h7b                                                          | N/A | N/A |
| 10425611 | Aco2                                                            | N/A | N/A |
| 10425623 | Csdc2                                                           | N/A | N/A |
| 10425630 | 1700029P11Rik                                                   | N/A | N/A |
| 10425651 | 4930407110Rik                                                   | N/A | N/A |
| 10425653 | 4930407110Rik                                                   | N/A | N/A |
| 10425695 | Srefb2                                                          | N/A | N/A |
| 10425723 | 1500009C09Rik                                                   | N/A | N/A |
| 10425755 | ---                                                             | N/A | N/A |
| 10425757 | 1500032L24Rik                                                   | N/A | N/A |
| 10425761 | ---                                                             | N/A | N/A |
| 10425799 | Rnu12                                                           | N/A | N/A |
| 10425801 | Bik                                                             | N/A | N/A |
| 10425808 | Tspo                                                            | N/A | N/A |
| 10425814 | Mpped1                                                          | N/A | N/A |
| 10425822 | Pnpla3                                                          | N/A | N/A |
| 10425834 | Samm50                                                          | N/A | N/A |
| 10425852 | Parvb                                                           | N/A | N/A |
| 10425880 | Prr5                                                            | N/A | N/A |
| 10425903 | Gm4609 /// Gm2451                                               | N/A | N/A |
| 10425905 | Nup50                                                           | N/A | N/A |
| 10425966 | Atxn10                                                          | N/A | N/A |
| 10425981 | Gm4825                                                          | N/A | N/A |
| 10425983 | Mirlet7c-2                                                      | N/A | N/A |
| 10425985 | Mirlet7b                                                        | N/A | N/A |
| 10425987 | Ppara                                                           | N/A | N/A |
| 10425999 | Ttc38                                                           | N/A | N/A |
| 10426065 | Tbc1d22a                                                        | N/A | N/A |
| 10426081 | Fam19a5                                                         | N/A | N/A |
| 10426093 | Zbed4 /// 4930529C04Rik                                         | N/A | N/A |
| 10426098 | Crel2                                                           | N/A | N/A |
| 10426150 | Panx2                                                           | N/A | N/A |
| 10426157 | Trabd                                                           | N/A | N/A |
| 10426169 | 1300018J18Rik /// Tubgcp6                                       | N/A | N/A |
| 10426180 | Ppp6r2                                                          | N/A | N/A |
| 10426225 | Ncaph2                                                          | N/A | N/A |
| 10426240 | Klhdc7b                                                         | N/A | N/A |
| 10426242 | Chkb                                                            | N/A | N/A |
| 10426244 | Mapk8ip2                                                        | N/A | N/A |
| 10426261 | Shank3                                                          | N/A | N/A |
| 10426284 | Acr                                                             | N/A | N/A |
| 10426292 | Alg10b                                                          | N/A | N/A |
| 10426296 | Gm10839                                                         | N/A | N/A |
| 10426298 | ---                                                             | N/A | N/A |
| 10426301 | Tcea1                                                           | N/A | N/A |
| 10426368 | Lrrk2                                                           | N/A | N/A |
| 10426383 | Muc19                                                           | N/A | N/A |
| 10426397 | Cntn1                                                           | N/A | N/A |
| 10426425 | Pdzrn4                                                          | N/A | N/A |
| 10426435 | Gapdh /// Gm12070 /// Gm2606 /// Gm4609 /// Gm10290 /// Gm10291 | N/A | N/A |
| 10426437 | Rn7sk                                                           | N/A | N/A |
| 10426439 | Pphln1                                                          | N/A | N/A |
| 10426451 | Irak4                                                           | N/A | N/A |
| 10426467 | Tmem117                                                         | N/A | N/A |
| 10426477 | Snrpc                                                           | N/A | N/A |
| 10426479 | Ano6                                                            | N/A | N/A |
| 10426500 | ---                                                             | N/A | N/A |
| 10426507 | Arid2                                                           | N/A | N/A |
| 10426535 | Fam113b /// Amigo2                                              | N/A | N/A |
| 10426542 | Rapgef3 /// Gm10835                                             | N/A | N/A |
| 10426544 | Slc48a1                                                         | N/A | N/A |
| 10426550 | Tmem106c                                                        | N/A | N/A |
| 10426557 | Pfkm                                                            | N/A | N/A |
| 10426581 | A1836003                                                        | N/A | N/A |
| 10426592 | Olf282                                                          | N/A | N/A |
| 10426598 | ---                                                             | N/A | N/A |
| 10426601 | Olf234                                                          | N/A | N/A |
| 10426603 | Ccnt1 /// 9330020H09Rik                                         | N/A | N/A |
| 10426627 | Ccdc65                                                          | N/A | N/A |
| 10426643 | Prkag1                                                          | N/A | N/A |
| 10426645 | B430209F14Rik                                                   | N/A | N/A |
| 10426648 | Rpl36 /// Gm13611 /// Gm8973                                    | N/A | N/A |
| 10426650 | Tuba1c /// Gm6682 /// Tuba1b /// Gm5620                         | N/A | N/A |
| 10426685 | Dnajc22                                                         | N/A | N/A |
| 10426689 | Spats2                                                          | N/A | N/A |
| 10426751 | Tmbim6                                                          | N/A | N/A |
| 10426767 | Aqp5                                                            | N/A | N/A |
| 10426798 | Smarcd1                                                         | N/A | N/A |
| 10426812 | Gpd1                                                            | N/A | N/A |
| 10426822 | 2310016M24Rik                                                   | N/A | N/A |
| 10426827 | Larp4                                                           | N/A | N/A |
| 10426835 | Dip2b                                                           | N/A | N/A |
| 10426875 | Atf1                                                            | N/A | N/A |

|          |                                |     |     |
|----------|--------------------------------|-----|-----|
| 10426889 | Sec61b                         | N/A | N/A |
| 10426891 | Metti7a1                       | N/A | N/A |
| 10426909 | Letmd1                         | N/A | N/A |
| 10426921 | Dazap2                         | N/A | N/A |
| 10426955 | Scn8a                          | N/A | N/A |
| 10427015 | Acvr1b                         | N/A | N/A |
| 10427035 | Nr4a1                          | N/A | N/A |
| 10427045 | 9430023L20Rik                  | N/A | N/A |
| 10427049 | 6030408B16Rik                  | N/A | N/A |
| 10427075 | Krt18                          | N/A | N/A |
| 10427083 | Eif4b                          | N/A | N/A |
| 10427095 | Tenc1                          | N/A | N/A |
| 10427125 | Igfbp6                         | N/A | N/A |
| 10427148 | Zfp740                         | N/A | N/A |
| 10427159 | Gm9918                         | N/A | N/A |
| 10427162 | Mfsd5                          | N/A | N/A |
| 10427199 | Pfdn5                          | N/A | N/A |
| 10427205 | Myg1                           | N/A | N/A |
| 10427214 | Sp1                            | N/A | N/A |
| 10427235 | Prr13                          | N/A | N/A |
| 10427241 | Pcbp2 /// Map3k12              | N/A | N/A |
| 10427253 | Map3k12                        | N/A | N/A |
| 10427255 | Tarbp2                         | N/A | N/A |
| 10427266 | Rpl39                          | N/A | N/A |
| 10427284 | Mir196a-2                      | N/A | N/A |
| 10427301 | Mir615                         | N/A | N/A |
| 10427310 | Hnrnpa1 /// Gm10052 /// Gm5643 | N/A | N/A |
| 10427323 | Copz1                          | N/A | N/A |
| 10427334 | Mir148b                        | N/A | N/A |
| 10427369 | Pde1b                          | N/A | N/A |
| 10427389 | LOC280487                      | N/A | N/A |
| 10427399 | Ccdc152                        | N/A | N/A |
| 10427420 | Fbxo4                          | N/A | N/A |
| 10427428 | AW549877                       | N/A | N/A |
| 10427454 | Card6                          | N/A | N/A |
| 10427459 | ---                            | N/A | N/A |
| 10427468 | ---                            | N/A | N/A |
| 10427492 | Gm10050                        | N/A | N/A |
| 10427494 | ---                            | N/A | N/A |
| 10427521 | Wdr70                          | N/A | N/A |
| 10427538 | Nipbl                          | N/A | N/A |
| 10427590 | Slc1a3                         | N/A | N/A |
| 10427603 | ---                            | N/A | N/A |
| 10427622 | ---                            | N/A | N/A |
| 10427624 | Ugt3a2 /// Ugt3a1              | N/A | N/A |
| 10427653 | Spef2                          | N/A | N/A |
| 10427655 | Spef2                          | N/A | N/A |
| 10427657 | Spef2                          | N/A | N/A |
| 10427659 | Spef2                          | N/A | N/A |
| 10427661 | Spef2                          | N/A | N/A |
| 10427663 | Spef2                          | N/A | N/A |
| 10427665 | Spef2                          | N/A | N/A |
| 10427667 | Spef2                          | N/A | N/A |
| 10427669 | Spef2                          | N/A | N/A |
| 10427673 | ---                            | N/A | N/A |
| 10427675 | Spef2                          | N/A | N/A |
| 10427677 | Spef2                          | N/A | N/A |
| 10427679 | Spef2                          | N/A | N/A |
| 10427681 | Spef2                          | N/A | N/A |
| 10427683 | Spef2                          | N/A | N/A |
| 10427685 | Spef2                          | N/A | N/A |
| 10427687 | Spef2                          | N/A | N/A |
| 10427689 | Spef2                          | N/A | N/A |
| 10427693 | Spef2                          | N/A | N/A |
| 10427704 | Dnajc21                        | N/A | N/A |
| 10427718 | Brix1                          | N/A | N/A |
| 10427742 | ---                            | N/A | N/A |
| 10427744 | Rai14                          | N/A | N/A |
| 10427766 | Rxfp3                          | N/A | N/A |
| 10427772 | Tars                           | N/A | N/A |
| 10427796 | Npr3                           | N/A | N/A |
| 10427807 | Sub1                           | N/A | N/A |
| 10427845 | F830212C03Rik                  | N/A | N/A |
| 10427847 | LOC669751                      | N/A | N/A |
| 10427849 | 6030458C11Rik                  | N/A | N/A |
| 10427862 | Cdh6                           | N/A | N/A |
| 10427877 | ---                            | N/A | N/A |
| 10427879 | ---                            | N/A | N/A |
| 10427881 | ---                            | N/A | N/A |
| 10427883 | Acot10                         | N/A | N/A |
| 10427885 | Gm10052 /// Hnrnpa1 /// Gm5803 | N/A | N/A |
| 10427888 | ---                            | N/A | N/A |
| 10427895 | Basp1                          | N/A | N/A |
| 10427898 | Fbxl7                          | N/A | N/A |

|          |                      |     |     |
|----------|----------------------|-----|-----|
| 10427904 | Fbxl7                | N/A | N/A |
| 10427906 | D130046C19Rik        | N/A | N/A |
| 10427908 | Gm9948               | N/A | N/A |
| 10427918 | Fam105a              | N/A | N/A |
| 10427928 | Trio                 | N/A | N/A |
| 10427991 | Trio                 | N/A | N/A |
| 10427993 | ---                  | N/A | N/A |
| 10427995 | ---                  | N/A | N/A |
| 10427997 | Ankrd33b             | N/A | N/A |
| 10428002 | Ankrd33b             | N/A | N/A |
| 10428004 | Ankrd33b             | N/A | N/A |
| 10428012 | Ropn1l               | N/A | N/A |
| 10428018 | Ube2v2 /// LOC635992 | N/A | N/A |
| 10428020 | March6               | N/A | N/A |
| 10428066 | 1700084J12Rik        | N/A | N/A |
| 10428068 | Tsply5               | N/A | N/A |
| 10428074 | Rpl30                | N/A | N/A |
| 10428081 | Hrsp12               | N/A | N/A |
| 10428089 | Nipal2               | N/A | N/A |
| 10428103 | Stk3                 | N/A | N/A |
| 10428117 | Mir599               | N/A | N/A |
| 10428157 | Rnf19a               | N/A | N/A |
| 10428169 | Rpl7a                | N/A | N/A |
| 10428171 | Ankrd46              | N/A | N/A |
| 10428192 | Pabpc1               | N/A | N/A |
| 10428204 | Ywhaz                | N/A | N/A |
| 10428211 | Zfp706               | N/A | N/A |
| 10428215 | ---                  | N/A | N/A |
| 10428222 | Ncald                | N/A | N/A |
| 10428232 | Rrm2b                | N/A | N/A |
| 10428302 | Kif10                | N/A | N/A |
| 10428308 | G930009F23Rik        | N/A | N/A |
| 10428326 | ---                  | N/A | N/A |
| 10428328 | Slc25a32             | N/A | N/A |
| 10428336 | Ftl2 /// Ftl1        | N/A | N/A |
| 10428338 | Dpys                 | N/A | N/A |
| 10428366 | Gm10383              | N/A | N/A |
| 10428368 | ---                  | N/A | N/A |
| 10428374 | ---                  | N/A | N/A |
| 10428376 | Angpt1               | N/A | N/A |
| 10428396 | ---                  | N/A | N/A |
| 10428398 | Eif3e                | N/A | N/A |
| 10428405 | Gm10373              | N/A | N/A |
| 10428407 | Tmem74               | N/A | N/A |
| 10428412 | Nudcd1               | N/A | N/A |
| 10428426 | Sybu                 | N/A | N/A |
| 10428439 | ---                  | N/A | N/A |
| 10428443 | Kcnv1                | N/A | N/A |
| 10428449 | ---                  | N/A | N/A |
| 10428451 | ---                  | N/A | N/A |
| 10428453 | Csmd3                | N/A | N/A |
| 10428509 | Csmd3                | N/A | N/A |
| 10428511 | Csmd3                | N/A | N/A |
| 10428513 | Csmd3                | N/A | N/A |
| 10428515 | Csmd3                | N/A | N/A |
| 10428517 | Csmd3                | N/A | N/A |
| 10428522 | Csmd3                | N/A | N/A |
| 10428534 | Trps1                | N/A | N/A |
| 10428536 | Trps1                | N/A | N/A |
| 10428554 | Eif3h                | N/A | N/A |
| 10428561 | Rad21                | N/A | N/A |
| 10428579 | Ext1                 | N/A | N/A |
| 10428594 | Samd12               | N/A | N/A |
| 10428602 | ---                  | N/A | N/A |
| 10428613 | Gm5215               | N/A | N/A |
| 10428648 | Taf2                 | N/A | N/A |
| 10428682 | ---                  | N/A | N/A |
| 10428690 | Mrpl13               | N/A | N/A |
| 10428698 | Sntb1                | N/A | N/A |
| 10428736 | Der1                 | N/A | N/A |
| 10428744 | 9130401M01Rik        | N/A | N/A |
| 10428753 | ---                  | N/A | N/A |
| 10428755 | Zhx1                 | N/A | N/A |
| 10428796 | Fbxo32               | N/A | N/A |
| 10428809 | Klh38                | N/A | N/A |
| 10428825 | ---                  | N/A | N/A |
| 10428827 | Tmem65               | N/A | N/A |
| 10428837 | ---                  | N/A | N/A |
| 10428839 | Gm5959               | N/A | N/A |
| 10428842 | Tatdn1 /// Rnf139    | N/A | N/A |
| 10428857 | Mtss1                | N/A | N/A |
| 10428877 | E430025E21Rik        | N/A | N/A |
| 10428908 | ---                  | N/A | N/A |
| 10428910 | 4933412E24Rik        | N/A | N/A |

|          |                                 |     |     |
|----------|---------------------------------|-----|-----|
| 10428918 | 9930014A18Rik /// Fam84b        | N/A | N/A |
| 10428931 | ---                             | N/A | N/A |
| 10428933 | H2afy3                          | N/A | N/A |
| 10428983 | Fam49b                          | N/A | N/A |
| 10429029 | Adcy8                           | N/A | N/A |
| 10429081 | Snrpc                           | N/A | N/A |
| 10429083 | Kcnq3                           | N/A | N/A |
| 10429100 | Lrrc6                           | N/A | N/A |
| 10429140 | Ndrgr1                          | N/A | N/A |
| 10429160 | St3gal1                         | N/A | N/A |
| 10429176 | St3gal1                         | N/A | N/A |
| 10429178 | Zfat                            | N/A | N/A |
| 10429197 | Mir30b                          | N/A | N/A |
| 10429199 | Mir30d                          | N/A | N/A |
| 10429201 | Nfu1                            | N/A | N/A |
| 10429203 | Fam135b                         | N/A | N/A |
| 10429216 | Fam135b                         | N/A | N/A |
| 10429218 | Fam135b                         | N/A | N/A |
| 10429220 | Fam135b                         | N/A | N/A |
| 10429222 | Fam135b                         | N/A | N/A |
| 10429295 | Kcnk9                           | N/A | N/A |
| 10429298 | Trappc9                         | N/A | N/A |
| 10429325 | ---                             | N/A | N/A |
| 10429327 | Eif2c2                          | N/A | N/A |
| 10429329 | Eif2c2                          | N/A | N/A |
| 10429385 | Mir151                          | N/A | N/A |
| 10429387 | Ptplb                           | N/A | N/A |
| 10429389 | Rpl17 /// Gm10268 /// Rpl17-ps3 | N/A | N/A |
| 10429391 | Slc45a4                         | N/A | N/A |
| 10429400 | ---                             | N/A | N/A |
| 10429407 | ---                             | N/A | N/A |
| 10429424 | ---                             | N/A | N/A |
| 10429426 | Gm628                           | N/A | N/A |
| 10429428 | Gm628                           | N/A | N/A |
| 10429440 | Gm628                           | N/A | N/A |
| 10429442 | Gm628                           | N/A | N/A |
| 10429444 | Gm628                           | N/A | N/A |
| 10429446 | Gm628                           | N/A | N/A |
| 10429460 | 7120482A17Rik                   | N/A | N/A |
| 10429491 | Arc                             | N/A | N/A |
| 10429495 | Jrk                             | N/A | N/A |
| 10429506 | Lypd2                           | N/A | N/A |
| 10429515 | Lynx1                           | N/A | N/A |
| 10429520 | Ly6d                            | N/A | N/A |
| 10429564 | Ly6a                            | N/A | N/A |
| 10429568 | Ly6c2 /// Ly6c1                 | N/A | N/A |
| 10429588 | 9030619P08Rik                   | N/A | N/A |
| 10429607 | Top1mt                          | N/A | N/A |
| 10429638 | ---                             | N/A | N/A |
| 10429641 | Naprt1                          | N/A | N/A |
| 10429666 | Pycr1                           | N/A | N/A |
| 10429674 | Tsta3                           | N/A | N/A |
| 10429739 | Puf60                           | N/A | N/A |
| 10429754 | Nrbp2                           | N/A | N/A |
| 10429772 | Eppk1                           | N/A | N/A |
| 10429856 | Spatc1 /// Gm10872              | N/A | N/A |
| 10429859 | Oplah /// Gm10345               | N/A | N/A |
| 10429885 | Sharpin                         | N/A | N/A |
| 10429926 | Dgat1                           | N/A | N/A |
| 10429944 | Scrt1                           | N/A | N/A |
| 10429949 | Rpl29                           | N/A | N/A |
| 10429957 | Fbxl6                           | N/A | N/A |
| 10429968 | ---                             | N/A | N/A |
| 10429970 | Adck5 /// Gm10869               | N/A | N/A |
| 10430020 | Vps28                           | N/A | N/A |
| 10430058 | Cyhr1                           | N/A | N/A |
| 10430105 | C030006K11Rik /// Lrrc24        | N/A | N/A |
| 10430113 | Arhgap39                        | N/A | N/A |
| 10430127 | Zfp251                          | N/A | N/A |
| 10430132 | Zfp647                          | N/A | N/A |
| 10430145 | Rbfox2                          | N/A | N/A |
| 10430166 | Apol7a                          | N/A | N/A |
| 10430174 | Apol9a /// Apol9b               | N/A | N/A |
| 10430195 | Apol8                           | N/A | N/A |
| 10430201 | Myh9                            | N/A | N/A |
| 10430245 | ---                             | N/A | N/A |
| 10430247 | Txn2                            | N/A | N/A |
| 10430255 | Foxred2                         | N/A | N/A |
| 10430265 | Eif3d                           | N/A | N/A |
| 10430280 | Cacng2                          | N/A | N/A |
| 10430282 | Cacng2                          | N/A | N/A |
| 10430289 | Ift27                           | N/A | N/A |
| 10430319 | Tst                             | N/A | N/A |
| 10430324 | Tmprss6                         | N/A | N/A |

|          |                           |     |     |
|----------|---------------------------|-----|-----|
| 10430370 | ---                       | N/A | N/A |
| 10430372 | Rac2                      | N/A | N/A |
| 10430382 | ---                       | N/A | N/A |
| 10430384 | Elfn2                     | N/A | N/A |
| 10430431 | Gm10866                   | N/A | N/A |
| 10430433 | ---                       | N/A | N/A |
| 10430436 | Gm10865                   | N/A | N/A |
| 10430438 | Ankrd54                   | N/A | N/A |
| 10430447 | 1700088E04Rik /// Micall1 | N/A | N/A |
| 10430458 | Sox10                     | N/A | N/A |
| 10430489 | Pla2g6                    | N/A | N/A |
| 10430510 | Tmem184b                  | N/A | N/A |
| 10430533 | Kcnj4                     | N/A | N/A |
| 10430536 | Ddx17                     | N/A | N/A |
| 10430572 | ---                       | N/A | N/A |
| 10430574 | 4933432B09Rik             | N/A | N/A |
| 10430593 | Josd1                     | N/A | N/A |
| 10430596 | Sun2                      | N/A | N/A |
| 10430618 | Dnalc4                    | N/A | N/A |
| 10430626 | Nptxr /// Npcd /// Cbx6   | N/A | N/A |
| 10430645 | D730005E14Rik             | N/A | N/A |
| 10430647 | D730005E14Rik             | N/A | N/A |
| 10430649 | Cbx7                      | N/A | N/A |
| 10430660 | Pdgfb                     | N/A | N/A |
| 10430669 | Rpl3                      | N/A | N/A |
| 10430679 | ---                       | N/A | N/A |
| 10430693 | Mkl1                      | N/A | N/A |
| 10430711 | Slc25a17                  | N/A | N/A |
| 10430723 | ---                       | N/A | N/A |
| 10430725 | St13                      | N/A | N/A |
| 10430739 | Dnajb7                    | N/A | N/A |
| 10430743 | ---                       | N/A | N/A |
| 10430745 | Chadl                     | N/A | N/A |
| 10430748 | Rangap1                   | N/A | N/A |
| 10430768 | ---                       | N/A | N/A |
| 10430778 | Phf5a                     | N/A | N/A |
| 10430783 | Polr3h                    | N/A | N/A |
| 10430804 | Pppde2                    | N/A | N/A |
| 10430811 | Nhp21                     | N/A | N/A |
| 10430818 | Tnfrsf13c                 | N/A | N/A |
| 10430834 | Naga                      | N/A | N/A |
| 10430851 | Cyp2d22                   | N/A | N/A |
| 10430866 | Cyp2d10                   | N/A | N/A |
| 10430871 | Gm9855 /// Tdg /// Gm5806 | N/A | N/A |
| 10430883 | Cyp2d13                   | N/A | N/A |
| 10430892 | Pcdhb11 /// Cyp2d37-ps    | N/A | N/A |
| 10430909 | Cyp2d26                   | N/A | N/A |
| 10430920 | Tcf20                     | N/A | N/A |
| 10430929 | Tbrg3                     | N/A | N/A |
| 10430941 | Rrp7a /// Serhl           | N/A | N/A |
| 10430945 | Poldip3                   | N/A | N/A |
| 10430956 | Cyb5r3                    | N/A | N/A |
| 10430974 | Arfgap3                   | N/A | N/A |
| 10430993 | 1700001L05Rik             | N/A | N/A |
| 10430997 | Pacsin2                   | N/A | N/A |
| 10431014 | Vkorc11                   | N/A | N/A |
| 10431017 | Ttll1                     | N/A | N/A |
| 10431030 | Mcat                      | N/A | N/A |
| 10431035 | Ttll12                    | N/A | N/A |
| 10431147 | Ldoc1l                    | N/A | N/A |
| 10431170 | 5031439G07Rik             | N/A | N/A |
| 10431208 | ---                       | N/A | N/A |
| 10431266 | Cerk                      | N/A | N/A |
| 10431282 | 2810001A02Rik             | N/A | N/A |
| 10431284 | Brd1                      | N/A | N/A |
| 10431326 | Mlc1                      | N/A | N/A |
| 10431352 | Tubgcp6                   | N/A | N/A |
| 10431393 | Mapk12                    | N/A | N/A |
| 10431410 | Mapk11                    | N/A | N/A |
| 10431424 | Plxnb2                    | N/A | N/A |
| 10431463 | Fam116b                   | N/A | N/A |
| 10431486 | Sbf1                      | N/A | N/A |
| 10431528 | Lmf2                      | N/A | N/A |
| 10431558 | Odf3b                     | N/A | N/A |
| 10431585 | Chkb /// BC090627         | N/A | N/A |
| 10431601 | Arsa                      | N/A | N/A |
| 10431612 | Rabl2                     | N/A | N/A |
| 10431625 | Syt10                     | N/A | N/A |
| 10431635 | ---                       | N/A | N/A |
| 10431656 | Rpl31 /// Gm16382         | N/A | N/A |
| 10431659 | Kif21a                    | N/A | N/A |
| 10431697 | Abcd2                     | N/A | N/A |
| 10431711 | Slc2a13                   | N/A | N/A |
| 10431722 | Gxylt1                    | N/A | N/A |

|          |                              |     |     |
|----------|------------------------------|-----|-----|
| 10431732 | Zcrb1                        | N/A | N/A |
| 10431802 | Twf1                         | N/A | N/A |
| 10431812 | Nell2                        | N/A | N/A |
| 10431839 | Dbx2                         | N/A | N/A |
| 10431845 | Ano6                         | N/A | N/A |
| 10431856 | Srsf2ip                      | N/A | N/A |
| 10431872 | Slc38a1                      | N/A | N/A |
| 10431874 | Slc38a1                      | N/A | N/A |
| 10431912 | ---                          | N/A | N/A |
| 10431915 | Slc38a4                      | N/A | N/A |
| 10431935 | Amigo2 /// Fam113b           | N/A | N/A |
| 10431943 | ---                          | N/A | N/A |
| 10431946 | 5830453K13Rik                | N/A | N/A |
| 10431948 | Rpap3                        | N/A | N/A |
| 10432006 | Hdac7                        | N/A | N/A |
| 10432101 | Senp1                        | N/A | N/A |
| 10432122 | Asb8                         | N/A | N/A |
| 10432133 | Olf286                       | N/A | N/A |
| 10432150 | Olf257 /// Olf285            | N/A | N/A |
| 10432152 | Olf284                       | N/A | N/A |
| 10432162 | 2310037124Rik                | N/A | N/A |
| 10432176 | Snora34                      | N/A | N/A |
| 10432178 | Snora2b                      | N/A | N/A |
| 10432180 | Ccnt1                        | N/A | N/A |
| 10432215 | Ddx23                        | N/A | N/A |
| 10432236 | Rnd1                         | N/A | N/A |
| 10432256 | Arf3                         | N/A | N/A |
| 10432263 | ---                          | N/A | N/A |
| 10432278 | Ddn                          | N/A | N/A |
| 10432294 | Mll2                         | N/A | N/A |
| 10432298 | Mll2                         | N/A | N/A |
| 10432398 | Tuba1b /// Gm6682 /// Gm5620 | N/A | N/A |
| 10432404 | Tuba1a                       | N/A | N/A |
| 10432408 | C1ql4                        | N/A | N/A |
| 10432429 | ---                          | N/A | N/A |
| 10432471 | ---                          | N/A | N/A |
| 10432492 | Faim2                        | N/A | N/A |
| 10432509 | Uxt                          | N/A | N/A |
| 10432527 | Lass5                        | N/A | N/A |
| 10432540 | Lima1                        | N/A | N/A |
| 10432556 | ---                          | N/A | N/A |
| 10432558 | LOC100046692                 | N/A | N/A |
| 10432571 | 2310068J16Rik                | N/A | N/A |
| 10432573 | Slc11a2                      | N/A | N/A |
| 10432593 | Csrnp2                       | N/A | N/A |
| 10432601 | Tcfcp2                       | N/A | N/A |
| 10432619 | Pou6f1                       | N/A | N/A |
| 10432636 | Smagp                        | N/A | N/A |
| 10432675 | I730030J21Rik                | N/A | N/A |
| 10432918 | Krt8                         | N/A | N/A |
| 10432939 | Csad                         | N/A | N/A |
| 10432986 | Aaas                         | N/A | N/A |
| 10433003 | Sp7                          | N/A | N/A |
| 10433008 | Map3k12                      | N/A | N/A |
| 10433027 | Npff                         | N/A | N/A |
| 10433032 | Atf7                         | N/A | N/A |
| 10433034 | Atf7                         | N/A | N/A |
| 10433047 | ---                          | N/A | N/A |
| 10433049 | Atp5g2                       | N/A | N/A |
| 10433055 | Mir688                       | N/A | N/A |
| 10433057 | Calcoco1                     | N/A | N/A |
| 10433073 | Gm10831                      | N/A | N/A |
| 10433088 | Cbx5                         | N/A | N/A |
| 10433163 | Ppp1r1a                      | N/A | N/A |
| 10433177 | ---                          | N/A | N/A |
| 10433193 | Olf161                       | N/A | N/A |
| 10433195 | ---                          | N/A | N/A |
| 10433197 | ---                          | N/A | N/A |
| 10433212 | Olf15                        | N/A | N/A |
| 10433214 | Zfp174                       | N/A | N/A |
| 10433219 | Nat15                        | N/A | N/A |
| 10433228 | Cluap1                       | N/A | N/A |
| 10433262 | Rpl7a /// Gm5766             | N/A | N/A |
| 10433264 | Glis2                        | N/A | N/A |
| 10433274 | Vasn                         | N/A | N/A |
| 10433278 | Dnaja3                       | N/A | N/A |
| 10433292 | Hmox2 /// 5730403B10Rik      | N/A | N/A |
| 10433300 | ---                          | N/A | N/A |
| 10433311 | Mgrn1                        | N/A | N/A |
| 10433331 | Nudt161                      | N/A | N/A |
| 10433340 | 4930451G09Rik                | N/A | N/A |
| 10433352 | Ubn1                         | N/A | N/A |
| 10433389 | Fam86 /// Alg1               | N/A | N/A |
| 10433403 | Rbfox1                       | N/A | N/A |



|          |                                                    |     |     |
|----------|----------------------------------------------------|-----|-----|
| 10433428 | ---                                                | N/A | N/A |
| 10433431 | ---                                                | N/A | N/A |
| 10433433 | BC024814                                           | N/A | N/A |
| 10433445 | Abat                                               | N/A | N/A |
| 10433462 | Pmm2                                               | N/A | N/A |
| 10433472 | 1810013L24Rik                                      | N/A | N/A |
| 10433478 | ---                                                | N/A | N/A |
| 10433492 | Atf7ip2                                            | N/A | N/A |
| 10433494 | Nubp1                                              | N/A | N/A |
| 10433536 | Clec16a                                            | N/A | N/A |
| 10433562 | Rpl30 /// Gm12191 /// Gm6570 /// Gm5481 /// Gm6109 | N/A | N/A |
| 10433573 | ---                                                | N/A | N/A |
| 10433575 | Gm10832                                            | N/A | N/A |
| 10433578 | Snn                                                | N/A | N/A |
| 10433589 | Rundc2a                                            | N/A | N/A |
| 10433597 | Snx29                                              | N/A | N/A |
| 10433618 | Shisa9                                             | N/A | N/A |
| 10433620 | Ercc4                                              | N/A | N/A |
| 10433639 | Mkl2                                               | N/A | N/A |
| 10433656 | Mkl2                                               | N/A | N/A |
| 10433658 | Mir365-1                                           | N/A | N/A |
| 10433660 | Bfar /// 3110001I22Rik                             | N/A | N/A |
| 10433672 | Rrn3                                               | N/A | N/A |
| 10433691 | Ntan1 /// Pdxdc1                                   | N/A | N/A |
| 10433702 | Mpv17l                                             | N/A | N/A |
| 10433709 | 2900011O08Rik                                      | N/A | N/A |
| 10433719 | Mir484                                             | N/A | N/A |
| 10433721 | Nde1                                               | N/A | N/A |
| 10433735 | Abcc1                                              | N/A | N/A |
| 10433776 | Snai2                                              | N/A | N/A |
| 10433782 | Efcab1                                             | N/A | N/A |
| 10433792 | ---                                                | N/A | N/A |
| 10433797 | Prkdc                                              | N/A | N/A |
| 10433885 | Cebpd                                              | N/A | N/A |
| 10433887 | Pkp2                                               | N/A | N/A |
| 10433902 | Rpl30 /// Gm12191 /// Gm5481                       | N/A | N/A |
| 10433904 | Yars2                                              | N/A | N/A |
| 10433910 | Top3b                                              | N/A | N/A |
| 10433929 | Ppm1f                                              | N/A | N/A |
| 10433937 | ---                                                | N/A | N/A |
| 10433940 | Mapk1                                              | N/A | N/A |
| 10433971 | Rimbp3                                             | N/A | N/A |
| 10433988 | Serpind1                                           | N/A | N/A |
| 10433996 | Snap29                                             | N/A | N/A |
| 10434003 | Crkl                                               | N/A | N/A |
| 10434007 | Aifm3                                              | N/A | N/A |
| 10434029 | Lztr1                                              | N/A | N/A |
| 10434089 | Ccdc74a                                            | N/A | N/A |
| 10434094 | Klhl22                                             | N/A | N/A |
| 10434105 | Scarf2                                             | N/A | N/A |
| 10434117 | B830017H08Rik                                      | N/A | N/A |
| 10434121 | Tssk1                                              | N/A | N/A |
| 10434124 | Tssk2                                              | N/A | N/A |
| 10434128 | Vpreb2                                             | N/A | N/A |
| 10434131 | AA066038                                           | N/A | N/A |
| 10434133 | Dgcr6                                              | N/A | N/A |
| 10434165 | Arvcf                                              | N/A | N/A |
| 10434189 | ---                                                | N/A | N/A |
| 10434191 | Txnrd2                                             | N/A | N/A |
| 10434224 | Gnb1l                                              | N/A | N/A |
| 10434226 | ---                                                | N/A | N/A |
| 10434229 | Cldn5                                              | N/A | N/A |
| 10434233 | Ufd1l                                              | N/A | N/A |
| 10434248 | 2510002D24Rik                                      | N/A | N/A |
| 10434252 | Hira                                               | N/A | N/A |
| 10434281 | LOC635992                                          | N/A | N/A |
| 10434283 | ---                                                | N/A | N/A |
| 10434285 | ---                                                | N/A | N/A |
| 10434287 | Olfir166                                           | N/A | N/A |
| 10434289 | ---                                                | N/A | N/A |
| 10434302 | Klhl24                                             | N/A | N/A |
| 10434313 | Yeats2                                             | N/A | N/A |
| 10434348 | Eif2b5                                             | N/A | N/A |
| 10434366 | Dvl3                                               | N/A | N/A |
| 10434384 | Ap2m1                                              | N/A | N/A |
| 10434396 | Abcf3                                              | N/A | N/A |
| 10434418 | Vwa5b2                                             | N/A | N/A |
| 10434446 | Ece2                                               | N/A | N/A |
| 10434481 | Eif4g1                                             | N/A | N/A |
| 10434516 | Fam131a                                            | N/A | N/A |
| 10434523 | Polr2h                                             | N/A | N/A |
| 10434552 | ---                                                | N/A | N/A |
| 10434556 | ---                                                | N/A | N/A |
| 10434577 | Vps8                                               | N/A | N/A |

|          |                              |     |     |
|----------|------------------------------|-----|-----|
| 10434629 | Map3k13                      | N/A | N/A |
| 10434643 | Psm3                         | N/A | N/A |
| 10434645 | Senp2                        | N/A | N/A |
| 10434664 | Ndufa11                      | N/A | N/A |
| 10434666 | ---                          | N/A | N/A |
| 10434668 | Tmem97                       | N/A | N/A |
| 10434670 | ---                          | N/A | N/A |
| 10434672 | Gng5 /// Gm3150              | N/A | N/A |
| 10434675 | Dnajb11                      | N/A | N/A |
| 10434689 | Ahsg                         | N/A | N/A |
| 10434698 | Fetub                        | N/A | N/A |
| 10434709 | Hrg                          | N/A | N/A |
| 10434717 | ---                          | N/A | N/A |
| 10434719 | Kng1                         | N/A | N/A |
| 10434733 | Eif4a2                       | N/A | N/A |
| 10434741 | ---                          | N/A | N/A |
| 10434743 | ---                          | N/A | N/A |
| 10434745 | ---                          | N/A | N/A |
| 10434754 | BC106179                     | N/A | N/A |
| 10434758 | St6gal1                      | N/A | N/A |
| 10434778 | Rtp4                         | N/A | N/A |
| 10434782 | Lpp                          | N/A | N/A |
| 10434799 | ---                          | N/A | N/A |
| 10434802 | Lpp                          | N/A | N/A |
| 10434804 | Mir28                        | N/A | N/A |
| 10434806 | Lpp                          | N/A | N/A |
| 10434835 | Leprel1                      | N/A | N/A |
| 10434845 | Il1rap                       | N/A | N/A |
| 10434869 | Ccdc50                       | N/A | N/A |
| 10434878 | Gm10823                      | N/A | N/A |
| 10434880 | Hrasls                       | N/A | N/A |
| 10434888 | Opa1                         | N/A | N/A |
| 10434925 | Hes1                         | N/A | N/A |
| 10434930 | 1700025H01Rik                | N/A | N/A |
| 10434932 | Fam43a                       | N/A | N/A |
| 10434934 | Bdh1                         | N/A | N/A |
| 10434942 | Dlg1                         | N/A | N/A |
| 10434993 | Pigz                         | N/A | N/A |
| 10434998 | Ncbp2                        | N/A | N/A |
| 10435004 | 1500031L02Rik                | N/A | N/A |
| 10435015 | Wdr53                        | N/A | N/A |
| 10435019 | 2310010M20Rik                | N/A | N/A |
| 10435024 | Rnf168                       | N/A | N/A |
| 10435031 | Ubxn7                        | N/A | N/A |
| 10435057 | Pcyt1a                       | N/A | N/A |
| 10435094 | Tnk2                         | N/A | N/A |
| 10435149 | Fytd1                        | N/A | N/A |
| 10435162 | Lrch3                        | N/A | N/A |
| 10435185 | ---                          | N/A | N/A |
| 10435187 | Rpl35a /// Ino80 /// Gm10247 | N/A | N/A |
| 10435212 | Osbpl11                      | N/A | N/A |
| 10435226 | Snx4                         | N/A | N/A |
| 10435237 | Zfp148                       | N/A | N/A |
| 10435266 | Heg1                         | N/A | N/A |
| 10435271 | Heg1                         | N/A | N/A |
| 10435305 | Itgb5                        | N/A | N/A |
| 10435345 | Mylk                         | N/A | N/A |
| 10435383 | Ptpnb                        | N/A | N/A |
| 10435388 | Adcy5                        | N/A | N/A |
| 10435413 | ---                          | N/A | N/A |
| 10435453 | Gm10237                      | N/A | N/A |
| 10435455 | Rpl35a /// Ino80 /// Gm10247 | N/A | N/A |
| 10435457 | Parp9 /// Dtx3l              | N/A | N/A |
| 10435470 | Kpna1                        | N/A | N/A |
| 10435487 | Wdr5b                        | N/A | N/A |
| 10435489 | Ccdc58                       | N/A | N/A |
| 10435543 | Golgb1                       | N/A | N/A |
| 10435565 | Hcls1                        | N/A | N/A |
| 10435626 | Hgd                          | N/A | N/A |
| 10435641 | Fstl1                        | N/A | N/A |
| 10435661 | Gpr156                       | N/A | N/A |
| 10435674 | ---                          | N/A | N/A |
| 10435676 | Gsk3b                        | N/A | N/A |
| 10435693 | Cox17                        | N/A | N/A |
| 10435712 | Cd80                         | N/A | N/A |
| 10435714 | Tmem39a                      | N/A | N/A |
| 10435724 | B4galt4                      | N/A | N/A |
| 10435743 | ---                          | N/A | N/A |
| 10435745 | Gm16498                      | N/A | N/A |
| 10435748 | D930030D11Rik                | N/A | N/A |
| 10435765 | ---                          | N/A | N/A |
| 10435767 | ---                          | N/A | N/A |
| 10435784 | Ndufs5 /// BC002163          | N/A | N/A |
| 10435787 | ---                          | N/A | N/A |

|          |                                              |     |     |
|----------|----------------------------------------------|-----|-----|
| 10435789 | Zbtb20                                       | N/A | N/A |
| 10435791 | Mir568 /// Zbtb20                            | N/A | N/A |
| 10435793 | Drd3                                         | N/A | N/A |
| 10435821 | Naa50                                        | N/A | N/A |
| 10435832 | Gm608                                        | N/A | N/A |
| 10435841 | Ccdc52                                       | N/A | N/A |
| 10435897 | BC027231                                     | N/A | N/A |
| 10435961 | Gm10808                                      | N/A | N/A |
| 10435963 | Atg3                                         | N/A | N/A |
| 10435991 | ---                                          | N/A | N/A |
| 10436034 | ---                                          | N/A | N/A |
| 10436037 | ---                                          | N/A | N/A |
| 10436041 | ---                                          | N/A | N/A |
| 10436046 | ---                                          | N/A | N/A |
| 10436048 | Prdx1                                        | N/A | N/A |
| 10436169 | Ift57                                        | N/A | N/A |
| 10436182 | Cd47                                         | N/A | N/A |
| 10436196 | Cd47                                         | N/A | N/A |
| 10436198 | ---                                          | N/A | N/A |
| 10436200 | ---                                          | N/A | N/A |
| 10436203 | Gm4416                                       | N/A | N/A |
| 10436209 | Cblb                                         | N/A | N/A |
| 10436232 | Rpl24                                        | N/A | N/A |
| 10436239 | 2310061103Rik /// Zbtb11                     | N/A | N/A |
| 10436348 | Tomm70a                                      | N/A | N/A |
| 10436369 | Filip1l                                      | N/A | N/A |
| 10436372 | Dcbl2 /// St3gal6                            | N/A | N/A |
| 10436392 | Cpox                                         | N/A | N/A |
| 10436402 | Cldnd1                                       | N/A | N/A |
| 10436412 | Olfir195                                     | N/A | N/A |
| 10436426 | Orai2                                        | N/A | N/A |
| 10436428 | Mina /// Crybg3                              | N/A | N/A |
| 10436442 | Fam60a                                       | N/A | N/A |
| 10436444 | ---                                          | N/A | N/A |
| 10436446 | Gps1                                         | N/A | N/A |
| 10436449 | ---                                          | N/A | N/A |
| 10436456 | Pros1                                        | N/A | N/A |
| 10436471 | Cggbp1                                       | N/A | N/A |
| 10436498 | ---                                          | N/A | N/A |
| 10436500 | Gbe1                                         | N/A | N/A |
| 10436517 | ---                                          | N/A | N/A |
| 10436519 | Robo1                                        | N/A | N/A |
| 10436550 | ---                                          | N/A | N/A |
| 10436561 | Usp25                                        | N/A | N/A |
| 10436588 | 2810055G20Rik                                | N/A | N/A |
| 10436590 | 2810055G20Rik                                | N/A | N/A |
| 10436594 | ---                                          | N/A | N/A |
| 10436596 | 2810055G20Rik                                | N/A | N/A |
| 10436598 | 2810055G20Rik                                | N/A | N/A |
| 10436600 | Mir99a                                       | N/A | N/A |
| 10436602 | Mirlet7c-1                                   | N/A | N/A |
| 10436606 | ---                                          | N/A | N/A |
| 10436608 | Cxadr                                        | N/A | N/A |
| 10436634 | Gm16509                                      | N/A | N/A |
| 10436636 | Ncam2                                        | N/A | N/A |
| 10436658 | 7120432105Rik                                | N/A | N/A |
| 10436662 | Mir155                                       | N/A | N/A |
| 10436664 | ---                                          | N/A | N/A |
| 10436666 | Jam2                                         | N/A | N/A |
| 10436678 | Gabpa                                        | N/A | N/A |
| 10436692 | Gm10791                                      | N/A | N/A |
| 10436694 | Rplp0                                        | N/A | N/A |
| 10436696 | ---                                          | N/A | N/A |
| 10436708 | Usp16                                        | N/A | N/A |
| 10436727 | ORF63                                        | N/A | N/A |
| 10436746 | Krtap13-1                                    | N/A | N/A |
| 10436748 | 2310034C09Rik                                | N/A | N/A |
| 10436750 | Gm5965                                       | N/A | N/A |
| 10436758 | Gm10229                                      | N/A | N/A |
| 10436760 | Krtap6-1                                     | N/A | N/A |
| 10436762 | ---                                          | N/A | N/A |
| 10436764 | Krtap6-3                                     | N/A | N/A |
| 10436766 | Krtap20-2 /// LOC100048551 /// 1110057P08Rik | N/A | N/A |
| 10436768 | Gm10061                                      | N/A | N/A |
| 10436773 | Gm9789 /// Gm7735                            | N/A | N/A |
| 10436775 | 1110057P08Rik                                | N/A | N/A |
| 10436779 | ---                                          | N/A | N/A |
| 10436781 | Gm10789                                      | N/A | N/A |
| 10436783 | Sod1                                         | N/A | N/A |
| 10436788 | Hunk                                         | N/A | N/A |
| 10436800 | 1110008E08Rik                                | N/A | N/A |
| 10436802 | ---                                          | N/A | N/A |
| 10436804 | Mrap                                         | N/A | N/A |
| 10436823 | Olig2                                        | N/A | N/A |

|          |                              |     |     |
|----------|------------------------------|-----|-----|
| 10436826 | ---                          | N/A | N/A |
| 10436828 | Olig1                        | N/A | N/A |
| 10436830 | Ifnar2                       | N/A | N/A |
| 10436841 | Ii10rb /// Ifnar2            | N/A | N/A |
| 10436849 | Ifnar1                       | N/A | N/A |
| 10436873 | Son                          | N/A | N/A |
| 10436890 | Gm10785                      | N/A | N/A |
| 10436892 | Itsn1                        | N/A | N/A |
| 10436941 | Mrps6 /// Slc5a3             | N/A | N/A |
| 10436945 | Slc5a3                       | N/A | N/A |
| 10436947 | Kcne2                        | N/A | N/A |
| 10436951 | Fam165b                      | N/A | N/A |
| 10436958 | Clic6                        | N/A | N/A |
| 10436967 | Cbr1                         | N/A | N/A |
| 10436976 | ---                          | N/A | N/A |
| 10436983 | Dopey2                       | N/A | N/A |
| 10437023 | Morc3                        | N/A | N/A |
| 10437080 | Ttc3                         | N/A | N/A |
| 10437132 | ---                          | N/A | N/A |
| 10437134 | Dyrk1a                       | N/A | N/A |
| 10437136 | Dyrk1a                       | N/A | N/A |
| 10437149 | ---                          | N/A | N/A |
| 10437160 | Ets2                         | N/A | N/A |
| 10437171 | ---                          | N/A | N/A |
| 10437174 | Wrb                          | N/A | N/A |
| 10437191 | B3galt5                      | N/A | N/A |
| 10437205 | Pcp4                         | N/A | N/A |
| 10437210 | Bace2                        | N/A | N/A |
| 10437222 | Hnrnpa3                      | N/A | N/A |
| 10437236 | B230307C23Rik                | N/A | N/A |
| 10437239 | ---                          | N/A | N/A |
| 10437257 | Zfp597                       | N/A | N/A |
| 10437270 | Cluap1                       | N/A | N/A |
| 10437292 | Btbd12                       | N/A | N/A |
| 10437311 | Trap1                        | N/A | N/A |
| 10437332 | Crebbp                       | N/A | N/A |
| 10437376 | Srl                          | N/A | N/A |
| 10437384 | Tcfap4                       | N/A | N/A |
| 10437392 | Pam16                        | N/A | N/A |
| 10437443 | 5730403B10Rik /// Hmox2      | N/A | N/A |
| 10437451 | Fam100a                      | N/A | N/A |
| 10437454 | Anks3                        | N/A | N/A |
| 10437499 | Glyr1                        | N/A | N/A |
| 10437573 | ---                          | N/A | N/A |
| 10437580 | ---                          | N/A | N/A |
| 10437582 | ---                          | N/A | N/A |
| 10437594 | Usp7                         | N/A | N/A |
| 10437627 | Rpl35a /// Ino80 /// Gm10247 | N/A | N/A |
| 10437629 | Grin2a                       | N/A | N/A |
| 10437639 | Emp2                         | N/A | N/A |
| 10437655 | Fam18a /// Nubp1             | N/A | N/A |
| 10437664 | Dexi                         | N/A | N/A |
| 10437677 | Prm3                         | N/A | N/A |
| 10437684 | Prm1                         | N/A | N/A |
| 10437687 | Litaf                        | N/A | N/A |
| 10437695 | Litaf /// Gm9861             | N/A | N/A |
| 10437698 | Txndc11                      | N/A | N/A |
| 10437712 | Zc3h7a                       | N/A | N/A |
| 10437735 | ---                          | N/A | N/A |
| 10437737 | Rsl1d1                       | N/A | N/A |
| 10437748 | Gspt1                        | N/A | N/A |
| 10437765 | Cpped1                       | N/A | N/A |
| 10437773 | ---                          | N/A | N/A |
| 10437775 | 2310015D24Rik                | N/A | N/A |
| 10437813 | ---                          | N/A | N/A |
| 10437817 | Pdxdc1                       | N/A | N/A |
| 10437846 | Ifitm7                       | N/A | N/A |
| 10437852 | 4921513D23Rik                | N/A | N/A |
| 10437928 | 0610037P05Rik                | N/A | N/A |
| 10437934 | Rpsa /// Rpsa-ps10           | N/A | N/A |
| 10437940 | ---                          | N/A | N/A |
| 10437942 | Ube2v2                       | N/A | N/A |
| 10437945 | Mcm4                         | N/A | N/A |
| 10437963 | Mzt2                         | N/A | N/A |
| 10437992 | Dnm1l                        | N/A | N/A |
| 10438040 | Olfr19                       | N/A | N/A |
| 10438049 | Spag6                        | N/A | N/A |
| 10438060 | Igll1                        | N/A | N/A |
| 10438069 | Ypel1                        | N/A | N/A |
| 10438071 | Ppil2                        | N/A | N/A |
| 10438094 | Mir130b                      | N/A | N/A |
| 10438096 | Mir301b                      | N/A | N/A |
| 10438112 | Pi4ka                        | N/A | N/A |
| 10438169 | ---                          | N/A | N/A |

|          |                                                  |     |     |
|----------|--------------------------------------------------|-----|-----|
| 10438178 | 4930451C15Rik                                    | N/A | N/A |
| 10438189 | Slc7a4                                           | N/A | N/A |
| 10438232 | Dgcr2                                            | N/A | N/A |
| 10438245 | Dgcr14                                           | N/A | N/A |
| 10438262 | Slc25a1                                          | N/A | N/A |
| 10438272 | Prodh                                            | N/A | N/A |
| 10438293 | Zdhhc8                                           | N/A | N/A |
| 10438308 | Ranbp1                                           | N/A | N/A |
| 10438313 | Dgcr8 /// Trmt2a                                 | N/A | N/A |
| 10438328 | D16H22S680E                                      | N/A | N/A |
| 10438338 | Mir185                                           | N/A | N/A |
| 10438340 | Comt1                                            | N/A | N/A |
| 10438358 | Gp1bb /// Sept5                                  | N/A | N/A |
| 10438376 | Rps2 /// Rps2-ps6 /// Gm5921 /// Gm6139          | N/A | N/A |
| 10438400 | Mrpl40                                           | N/A | N/A |
| 10438421 | Olfr164                                          | N/A | N/A |
| 10438423 | Olfr165                                          | N/A | N/A |
| 10438425 | Olfr167                                          | N/A | N/A |
| 10438427 | Olfr168                                          | N/A | N/A |
| 10438429 | Olfr170 /// Olfr171 /// Olfr169                  | N/A | N/A |
| 10438431 | Olfr170                                          | N/A | N/A |
| 10438433 | Olfr171                                          | N/A | N/A |
| 10438442 | A930003A15Rik                                    | N/A | N/A |
| 10438454 | Sumo2                                            | N/A | N/A |
| 10438460 | Parl                                             | N/A | N/A |
| 10438478 | Abcc5                                            | N/A | N/A |
| 10438515 | Gm15760                                          | N/A | N/A |
| 10438517 | Alg3                                             | N/A | N/A |
| 10438527 | Camk2n2                                          | N/A | N/A |
| 10438530 | Clcn2                                            | N/A | N/A |
| 10438564 | Rps10                                            | N/A | N/A |
| 10438570 | Magef1                                           | N/A | N/A |
| 10438572 | 2510009E07Rik                                    | N/A | N/A |
| 10438575 | Ehhadh                                           | N/A | N/A |
| 10438583 | Rpl12                                            | N/A | N/A |
| 10438585 | Tmem41a                                          | N/A | N/A |
| 10438621 | Tra2b                                            | N/A | N/A |
| 10438639 | Dgkg                                             | N/A | N/A |
| 10438666 | ---                                              | N/A | N/A |
| 10438672 | Tbccd1                                           | N/A | N/A |
| 10438681 | Kng2                                             | N/A | N/A |
| 10438708 | Masp1                                            | N/A | N/A |
| 10438726 | ---                                              | N/A | N/A |
| 10438730 | Sst                                              | N/A | N/A |
| 10438738 | Bcl6                                             | N/A | N/A |
| 10438753 | Leprel1                                          | N/A | N/A |
| 10438801 | Fgf12                                            | N/A | N/A |
| 10438813 | Mir690                                           | N/A | N/A |
| 10438815 | 1600021P15Rik                                    | N/A | N/A |
| 10438822 | Atp13a5                                          | N/A | N/A |
| 10438854 | Atp13a4                                          | N/A | N/A |
| 10438889 | 9530020O07Rik                                    | N/A | N/A |
| 10438899 | Cpn2                                             | N/A | N/A |
| 10438904 | Lrrc15                                           | N/A | N/A |
| 10438907 | Gp5                                              | N/A | N/A |
| 10438909 | Atp13a3                                          | N/A | N/A |
| 10438911 | Atp13a3                                          | N/A | N/A |
| 10438942 | Tmem44                                           | N/A | N/A |
| 10438959 | Lsg1                                             | N/A | N/A |
| 10438975 | AI480653                                         | N/A | N/A |
| 10438980 | Acap2                                            | N/A | N/A |
| 10439005 | Ppp1r2                                           | N/A | N/A |
| 10439009 | Apod                                             | N/A | N/A |
| 10439016 | Gm5415 /// 4930444G20Rik /// AF366264 /// Gm9839 | N/A | N/A |
| 10439018 | 0610012G03Rik                                    | N/A | N/A |
| 10439021 | Senp5                                            | N/A | N/A |
| 10439032 | Pak2                                             | N/A | N/A |
| 10439063 | Fbxo45                                           | N/A | N/A |
| 10439080 | ---                                              | N/A | N/A |
| 10439084 | Gm10818                                          | N/A | N/A |
| 10439092 | 1700021K19Rik                                    | N/A | N/A |
| 10439114 | Iqcg                                             | N/A | N/A |
| 10439126 | ---                                              | N/A | N/A |
| 10439130 | Umps                                             | N/A | N/A |
| 10439138 | Kalrn                                            | N/A | N/A |
| 10439204 | Rpl15 /// Gm4294                                 | N/A | N/A |
| 10439206 | ---                                              | N/A | N/A |
| 10439208 | Sec22a                                           | N/A | N/A |
| 10439216 | ---                                              | N/A | N/A |
| 10439218 | Pdia5                                            | N/A | N/A |
| 10439237 | Rps21                                            | N/A | N/A |
| 10439239 | Dirc2                                            | N/A | N/A |
| 10439268 | Dtx3l /// Parp9                                  | N/A | N/A |
| 10439285 | Gm6815                                           | N/A | N/A |

|          |                              |     |     |
|----------|------------------------------|-----|-----|
| 10439321 | Slc15a2                      | N/A | N/A |
| 10439357 | Fbxo40                       | N/A | N/A |
| 10439362 | Stxbp5l                      | N/A | N/A |
| 10439392 | Gtf2e1                       | N/A | N/A |
| 10439398 | Ndufb4                       | N/A | N/A |
| 10439402 | Rpl9 /// Gm5451              | N/A | N/A |
| 10439404 | ---                          | N/A | N/A |
| 10439409 | BC031361                     | N/A | N/A |
| 10439411 | Nr1i2                        | N/A | N/A |
| 10439424 | 4932425i24Rik                | N/A | N/A |
| 10439442 | Pla1a                        | N/A | N/A |
| 10439455 | Adprh                        | N/A | N/A |
| 10439463 | 4930455C21Rik                | N/A | N/A |
| 10439471 | Poglut1                      | N/A | N/A |
| 10439483 | Arhgap31                     | N/A | N/A |
| 10439498 | ---                          | N/A | N/A |
| 10439520 | ---                          | N/A | N/A |
| 10439523 | ---                          | N/A | N/A |
| 10439527 | Tigit                        | N/A | N/A |
| 10439532 | Qtrtd1                       | N/A | N/A |
| 10439542 | Zdhc23                       | N/A | N/A |
| 10439547 | Gramd1c                      | N/A | N/A |
| 10439566 | Atp6v1a                      | N/A | N/A |
| 10439634 | Gtpbp8                       | N/A | N/A |
| 10439642 | Slc35a5                      | N/A | N/A |
| 10439651 | Cd200                        | N/A | N/A |
| 10439695 | Tagln3                       | N/A | N/A |
| 10439701 | Abhd10                       | N/A | N/A |
| 10439710 | Phldb2                       | N/A | N/A |
| 10439762 | Ahcy                         | N/A | N/A |
| 10439766 | Pvrl3                        | N/A | N/A |
| 10439788 | ---                          | N/A | N/A |
| 10439798 | Dzip3                        | N/A | N/A |
| 10439830 | ---                          | N/A | N/A |
| 10439835 | Gm4802                       | N/A | N/A |
| 10439854 | Bbx                          | N/A | N/A |
| 10439874 | Ccdc54                       | N/A | N/A |
| 10439878 | Psmc1                        | N/A | N/A |
| 10439885 | ---                          | N/A | N/A |
| 10439887 | ---                          | N/A | N/A |
| 10439889 | ---                          | N/A | N/A |
| 10439891 | ---                          | N/A | N/A |
| 10439895 | Alcam                        | N/A | N/A |
| 10439915 | ---                          | N/A | N/A |
| 10439932 | ---                          | N/A | N/A |
| 10439934 | ---                          | N/A | N/A |
| 10439955 | Fam55c                       | N/A | N/A |
| 10439960 | Cep97                        | N/A | N/A |
| 10439974 | ---                          | N/A | N/A |
| 10439976 | 2310061J03Rik                | N/A | N/A |
| 10439985 | Rg9mtd1                      | N/A | N/A |
| 10439989 | ---                          | N/A | N/A |
| 10440037 | Nit2                         | N/A | N/A |
| 10440050 | Tbc1d23                      | N/A | N/A |
| 10440077 | 2610528E23Rik                | N/A | N/A |
| 10440097 | ---                          | N/A | N/A |
| 10440099 | St3gal6 /// Dcbld2           | N/A | N/A |
| 10440118 | ---                          | N/A | N/A |
| 10440131 | Gpr15                        | N/A | N/A |
| 10440136 | Olf173                       | N/A | N/A |
| 10440149 | Olf186                       | N/A | N/A |
| 10440160 | Olf192                       | N/A | N/A |
| 10440164 | Olf203 /// Olf194            | N/A | N/A |
| 10440168 | Olf197                       | N/A | N/A |
| 10440172 | Olf199                       | N/A | N/A |
| 10440174 | Olf201                       | N/A | N/A |
| 10440176 | Olf202                       | N/A | N/A |
| 10440180 | Olf205 /// Olf204            | N/A | N/A |
| 10440182 | Olf206                       | N/A | N/A |
| 10440184 | Olf208 /// Olf207 /// Olf209 | N/A | N/A |
| 10440186 | Crybg3 /// Mina              | N/A | N/A |
| 10440206 | Arl6                         | N/A | N/A |
| 10440216 | Epha6                        | N/A | N/A |
| 10440238 | Nsun3                        | N/A | N/A |
| 10440246 | Arl13b                       | N/A | N/A |
| 10440279 | Csnka2ip                     | N/A | N/A |
| 10440284 | 4930453N24Rik                | N/A | N/A |
| 10440288 | Zfp654                       | N/A | N/A |
| 10440292 | ---                          | N/A | N/A |
| 10440300 | ---                          | N/A | N/A |
| 10440302 | Htr1f                        | N/A | N/A |
| 10440307 | Chmp2b                       | N/A | N/A |
| 10440314 | Cadm2                        | N/A | N/A |
| 10440329 | 9330155M09Rik                | N/A | N/A |

|          |                       |     |     |
|----------|-----------------------|-----|-----|
| 10440338 | 4930423O20Rik         | N/A | N/A |
| 10440340 | ---                   | N/A | N/A |
| 10440342 | ---                   | N/A | N/A |
| 10440388 | Hspa13                | N/A | N/A |
| 10440406 | Nrip1                 | N/A | N/A |
| 10440414 | Fau                   | N/A | N/A |
| 10440417 | 9430053O09Rik         | N/A | N/A |
| 10440425 | ---                   | N/A | N/A |
| 10440427 | D16Ert472e            | N/A | N/A |
| 10440465 | ---                   | N/A | N/A |
| 10440467 | Rpl21 /// Rpl21-ps5   | N/A | N/A |
| 10440469 | ---                   | N/A | N/A |
| 10440471 | Mrpl39                | N/A | N/A |
| 10440491 | App                   | N/A | N/A |
| 10440513 | Cypr1                 | N/A | N/A |
| 10440534 | Adamts5               | N/A | N/A |
| 10440543 | Ltn1                  | N/A | N/A |
| 10440550 | Ltn1                  | N/A | N/A |
| 10440552 | Ltn1                  | N/A | N/A |
| 10440554 | Ltn1                  | N/A | N/A |
| 10440556 | Ltn1                  | N/A | N/A |
| 10440558 | Ltn1                  | N/A | N/A |
| 10440560 | Ltn1                  | N/A | N/A |
| 10440562 | Ltn1                  | N/A | N/A |
| 10440564 | Ltn1                  | N/A | N/A |
| 10440566 | Ltn1                  | N/A | N/A |
| 10440568 | Ltn1                  | N/A | N/A |
| 10440570 | Ltn1                  | N/A | N/A |
| 10440572 | Ltn1                  | N/A | N/A |
| 10440574 | Ltn1                  | N/A | N/A |
| 10440578 | Ltn1                  | N/A | N/A |
| 10440591 | ---                   | N/A | N/A |
| 10440600 | Cct8                  | N/A | N/A |
| 10440617 | ---                   | N/A | N/A |
| 10440619 | ---                   | N/A | N/A |
| 10440621 | Grik1                 | N/A | N/A |
| 10440643 | Cldn17                | N/A | N/A |
| 10440651 | Krtap24-1             | N/A | N/A |
| 10440653 | ---                   | N/A | N/A |
| 10440655 | 2310079G19Rik         | N/A | N/A |
| 10440664 | 2310061N02Rik         | N/A | N/A |
| 10440690 | Krtap16-4             | N/A | N/A |
| 10440698 | ---                   | N/A | N/A |
| 10440700 | AY026312              | N/A | N/A |
| 10440708 | ---                   | N/A | N/A |
| 10440711 | Gm10228               | N/A | N/A |
| 10440717 | Gm10229 /// Krtap16-8 | N/A | N/A |
| 10440719 | ---                   | N/A | N/A |
| 10440727 | Krtap8-1              | N/A | N/A |
| 10440734 | ---                   | N/A | N/A |
| 10440738 | Tiam1                 | N/A | N/A |
| 10440770 | Srsf15                | N/A | N/A |
| 10440794 | 2610039C10Rik         | N/A | N/A |
| 10440840 | 1110004E09Rik         | N/A | N/A |
| 10440849 | Synj1                 | N/A | N/A |
| 10440881 | Gcf1                  | N/A | N/A |
| 10440903 | 4932438H23Rik         | N/A | N/A |
| 10440909 | ---                   | N/A | N/A |
| 10440914 | Gm9881                | N/A | N/A |
| 10440916 | ---                   | N/A | N/A |
| 10440918 | Tmem50b               | N/A | N/A |
| 10440926 | Dnajc28               | N/A | N/A |
| 10440929 | Gart                  | N/A | N/A |
| 10440953 | Donson                | N/A | N/A |
| 10440964 | Cryz1                 | N/A | N/A |
| 10440993 | Rcan1                 | N/A | N/A |
| 10441017 | Setd4                 | N/A | N/A |
| 10441038 | Hlcs                  | N/A | N/A |
| 10441053 | ---                   | N/A | N/A |
| 10441064 | Dscr3                 | N/A | N/A |
| 10441091 | 6530402D11Rik         | N/A | N/A |
| 10441107 | Psmg1                 | N/A | N/A |
| 10441115 | Brwd1                 | N/A | N/A |
| 10441195 | Dscam                 | N/A | N/A |
| 10441231 | Bace2                 | N/A | N/A |
| 10441313 | C2cd2                 | N/A | N/A |
| 10441330 | Zfp295                | N/A | N/A |
| 10441342 | Synj2bp /// Cox16     | N/A | N/A |
| 10441344 | Rbm16                 | N/A | N/A |
| 10441359 | ---                   | N/A | N/A |
| 10441392 | Cldn20                | N/A | N/A |
| 10441394 | ---                   | N/A | N/A |
| 10441396 | Ppia                  | N/A | N/A |
| 10441398 | ---                   | N/A | N/A |

|          |                                            |     |     |
|----------|--------------------------------------------|-----|-----|
| 10441400 | Arid1b                                     | N/A | N/A |
| 10441422 | Zdhhc14                                    | N/A | N/A |
| 10441436 | Snx9                                       | N/A | N/A |
| 10441489 | Gtf2h5                                     | N/A | N/A |
| 10441494 | Tulp4                                      | N/A | N/A |
| 10441497 | Tulp4                                      | N/A | N/A |
| 10441509 | Ppp1r2 /// Gm5972                          | N/A | N/A |
| 10441554 | ---                                        | N/A | N/A |
| 10441556 | Gm1604b                                    | N/A | N/A |
| 10441565 | Rps6ka2                                    | N/A | N/A |
| 10441610 | Rsph3a /// Rsph3b                          | N/A | N/A |
| 10441620 | Fgfr1op                                    | N/A | N/A |
| 10441642 | Brp44l                                     | N/A | N/A |
| 10441646 | Sft2d1                                     | N/A | N/A |
| 10441657 | Prr18                                      | N/A | N/A |
| 10441680 | Pde10a                                     | N/A | N/A |
| 10441740 | Agpat4                                     | N/A | N/A |
| 10441751 | ---                                        | N/A | N/A |
| 10441753 | Plg                                        | N/A | N/A |
| 10441787 | Airn                                       | N/A | N/A |
| 10441791 | Airn                                       | N/A | N/A |
| 10441797 | Tcp1                                       | N/A | N/A |
| 10441811 | ---                                        | N/A | N/A |
| 10441813 | Snora20                                    | N/A | N/A |
| 10441856 | Gm10512                                    | N/A | N/A |
| 10441862 | Smok2b                                     | N/A | N/A |
| 10441864 | Mlit4                                      | N/A | N/A |
| 10441917 | ---                                        | N/A | N/A |
| 10441923 | Gm3435 /// 2210404j11Rik /// 9030025P20Rik | N/A | N/A |
| 10441933 | 2210404j11Rik /// Gm3435 /// 9030025P20Rik | N/A | N/A |
| 10441952 | Gm3435 /// 2210404j11Rik /// 9030025P20Rik | N/A | N/A |
| 10441954 | 2210404j11Rik                              | N/A | N/A |
| 10441956 | Fam120b                                    | N/A | N/A |
| 10441973 | Tbp                                        | N/A | N/A |
| 10441987 | Chd1                                       | N/A | N/A |
| 10442025 | Gm9943                                     | N/A | N/A |
| 10442027 | ---                                        | N/A | N/A |
| 10442030 | ---                                        | N/A | N/A |
| 10442037 | Zfp97 /// BC018101                         | N/A | N/A |
| 10442052 | Gm6712                                     | N/A | N/A |
| 10442057 | Riok2                                      | N/A | N/A |
| 10442069 | Lix1                                       | N/A | N/A |
| 10442081 | Mir99b                                     | N/A | N/A |
| 10442083 | Mirlet7e                                   | N/A | N/A |
| 10442085 | Mir125a                                    | N/A | N/A |
| 10442087 | Ncrna00085                                 | N/A | N/A |
| 10442104 | Fpr-rs4                                    | N/A | N/A |
| 10442120 | ---                                        | N/A | N/A |
| 10442123 | ---                                        | N/A | N/A |
| 10442139 | Vmn1r224                                   | N/A | N/A |
| 10442141 | Vmn1r225                                   | N/A | N/A |
| 10442143 | Gm5145                                     | N/A | N/A |
| 10442145 | Vmn1r226                                   | N/A | N/A |
| 10442149 | Vmn1r229                                   | N/A | N/A |
| 10442151 | Vmn1r230                                   | N/A | N/A |
| 10442153 | ---                                        | N/A | N/A |
| 10442155 | Ppp2r1a                                    | N/A | N/A |
| 10442172 | Zfp160                                     | N/A | N/A |
| 10442219 | Zfp52                                      | N/A | N/A |
| 10442224 | BC049807                                   | N/A | N/A |
| 10442236 | Gm10509 /// 3110052M02Rik                  | N/A | N/A |
| 10442238 | Zfp51 /// 3110052M02Rik                    | N/A | N/A |
| 10442240 | Zfp760                                     | N/A | N/A |
| 10442250 | Zfp229                                     | N/A | N/A |
| 10442254 | ---                                        | N/A | N/A |
| 10442256 | ---                                        | N/A | N/A |
| 10442258 | 4930432021Rik                              | N/A | N/A |
| 10442262 | Zfp758                                     | N/A | N/A |
| 10442270 | 1300003B13Rik                              | N/A | N/A |
| 10442285 | ---                                        | N/A | N/A |
| 10442292 | Vmn2r113                                   | N/A | N/A |
| 10442300 | ---                                        | N/A | N/A |
| 10442321 | Thoc6 /// Hcfc1r1                          | N/A | N/A |
| 10442341 | Srrm2                                      | N/A | N/A |
| 10442370 | Dcpp1 /// Dcpp2                            | N/A | N/A |
| 10442373 | Dcpp2                                      | N/A | N/A |
| 10442391 | ---                                        | N/A | N/A |
| 10442393 | Ntn3 /// BC028777 /// 1600002H07Rik        | N/A | N/A |
| 10442396 | Abca3                                      | N/A | N/A |
| 10442435 | Rnps1                                      | N/A | N/A |
| 10442454 | Pgp                                        | N/A | N/A |
| 10442458 | 9930021D14Rik /// Mlst8                    | N/A | N/A |
| 10442468 | Caskin1                                    | N/A | N/A |
| 10442493 | ---                                        | N/A | N/A |



|          |                                                                                                                           |     |     |
|----------|---------------------------------------------------------------------------------------------------------------------------|-----|-----|
| 10442495 | Pkd1                                                                                                                      | N/A | N/A |
| 10442549 | Zfp598                                                                                                                    | N/A | N/A |
| 10442580 | Rps2                                                                                                                      | N/A | N/A |
| 10442596 | Sepx1                                                                                                                     | N/A | N/A |
| 10442606 | 4930528F23Rik                                                                                                             | N/A | N/A |
| 10442616 | Hagh                                                                                                                      | N/A | N/A |
| 10442625 | Igfals                                                                                                                    | N/A | N/A |
| 10442629 | Spsb3                                                                                                                     | N/A | N/A |
| 10442643 | Nme3 /// Mrps34                                                                                                           | N/A | N/A |
| 10442649 | Mapk8ip3                                                                                                                  | N/A | N/A |
| 10442736 | BC003965                                                                                                                  | N/A | N/A |
| 10442739 | Unkl                                                                                                                      | N/A | N/A |
| 10442769 | ---                                                                                                                       | N/A | N/A |
| 10442816 | Lmf1                                                                                                                      | N/A | N/A |
| 10442827 | ---                                                                                                                       | N/A | N/A |
| 10442829 | Gng13 /// Chtf18                                                                                                          | N/A | N/A |
| 10442834 | Rpusd1                                                                                                                    | N/A | N/A |
| 10442887 | Fbx116                                                                                                                    | N/A | N/A |
| 10442904 | Jmj8 /// Stub1                                                                                                            | N/A | N/A |
| 10442914 | 0610011F06Rik                                                                                                             | N/A | N/A |
| 10442922 | Cox7c /// Gm10012                                                                                                         | N/A | N/A |
| 10442932 | Tmem8                                                                                                                     | N/A | N/A |
| 10442948 | Mrpl28                                                                                                                    | N/A | N/A |
| 10442986 | Luc7l                                                                                                                     | N/A | N/A |
| 10443007 | Neurl1B                                                                                                                   | N/A | N/A |
| 10443009 | Ergic1                                                                                                                    | N/A | N/A |
| 10443027 | A93001N09Rik                                                                                                              | N/A | N/A |
| 10443039 | Bnip1                                                                                                                     | N/A | N/A |
| 10443063 | Phf1                                                                                                                      | N/A | N/A |
| 10443080 | Syngap1                                                                                                                   | N/A | N/A |
| 10443087 | Syngap1                                                                                                                   | N/A | N/A |
| 10443089 | Syngap1                                                                                                                   | N/A | N/A |
| 10443091 | Syngap1                                                                                                                   | N/A | N/A |
| 10443095 | Syngap1                                                                                                                   | N/A | N/A |
| 10443108 | Syngap1                                                                                                                   | N/A | N/A |
| 10443110 | Syngap1                                                                                                                   | N/A | N/A |
| 10443117 | Bak1                                                                                                                      | N/A | N/A |
| 10443120 | Ggnbp1                                                                                                                    | N/A | N/A |
| 10443191 | Gm10505                                                                                                                   | N/A | N/A |
| 10443193 | Rpl30 /// Gm12191                                                                                                         | N/A | N/A |
| 10443199 | A1413582 /// C130040N14Rik                                                                                                | N/A | N/A |
| 10443201 | Pacsin1                                                                                                                   | N/A | N/A |
| 10443221 | Uhrf1bp1                                                                                                                  | N/A | N/A |
| 10443344 | ---                                                                                                                       | N/A | N/A |
| 10443360 | Rpl10a /// Rpl10a-ps2                                                                                                     | N/A | N/A |
| 10443367 | E23001N04Rik                                                                                                              | N/A | N/A |
| 10443378 | Gm749                                                                                                                     | N/A | N/A |
| 10443391 | Mapk14                                                                                                                    | N/A | N/A |
| 10443421 | Brpf3                                                                                                                     | N/A | N/A |
| 10443449 | Kctd20                                                                                                                    | N/A | N/A |
| 10443459 | Srsf3                                                                                                                     | N/A | N/A |
| 10443482 | BC004004                                                                                                                  | N/A | N/A |
| 10443492 | Rpl21 /// Gm6813 /// Gm9104 /// Rpl21-ps4 /// Rpl21-ps7 /// Gm16416 /// Rpl21-ps12 /// Rpl21-ps14 /// Rpl21-ps10 /// Gm80 | N/A | N/A |
| 10443527 | Pim1                                                                                                                      | N/A | N/A |
| 10443535 | Tbc1d22b                                                                                                                  | N/A | N/A |
| 10443550 | Rnf8                                                                                                                      | N/A | N/A |
| 10443561 | Ftsjd2                                                                                                                    | N/A | N/A |
| 10443589 | Zfand3                                                                                                                    | N/A | N/A |
| 10443596 | Gm9874                                                                                                                    | N/A | N/A |
| 10443690 | Glp1r                                                                                                                     | N/A | N/A |
| 10443764 | Slc37a1                                                                                                                   | N/A | N/A |
| 10443808 | Ndufv3                                                                                                                    | N/A | N/A |
| 10443814 | ---                                                                                                                       | N/A | N/A |
| 10443817 | Pknox1                                                                                                                    | N/A | N/A |
| 10443836 | Rrp1b                                                                                                                     | N/A | N/A |
| 10443852 | A530088E08Rik /// Rasal3                                                                                                  | N/A | N/A |
| 10443898 | Cyp4f15                                                                                                                   | N/A | N/A |
| 10443918 | C920016K16Rik                                                                                                             | N/A | N/A |
| 10443940 | Zfp955a /// Zfp955b                                                                                                       | N/A | N/A |
| 10443946 | Actl9                                                                                                                     | N/A | N/A |
| 10444008 | Zfp414                                                                                                                    | N/A | N/A |
| 10444041 | Ndufa7                                                                                                                    | N/A | N/A |
| 10444066 | Zbtb22                                                                                                                    | N/A | N/A |
| 10444068 | Tapbp                                                                                                                     | N/A | N/A |
| 10444079 | Rgl2                                                                                                                      | N/A | N/A |
| 10444114 | Vps52                                                                                                                     | N/A | N/A |
| 10444135 | AA388235                                                                                                                  | N/A | N/A |
| 10444244 | Tap1                                                                                                                      | N/A | N/A |
| 10444291 | H2-Ab1                                                                                                                    | N/A | N/A |
| 10444394 | Pbx2                                                                                                                      | N/A | N/A |
| 10444420 | Egfl8 /// Agpat1                                                                                                          | N/A | N/A |
| 10444431 | Prrt1                                                                                                                     | N/A | N/A |
| 10444436 | Fkbp1                                                                                                                     | N/A | N/A |
| 10444439 | Atf6b                                                                                                                     | N/A | N/A |

|          |                           |     |     |
|----------|---------------------------|-----|-----|
| 10444496 | Dom3z                     | N/A | N/A |
| 10444524 | Ehmt2                     | N/A | N/A |
| 10444589 | Hspa1b                    | N/A | N/A |
| 10444595 | Lsm2                      | N/A | N/A |
| 10444656 | ---                       | N/A | N/A |
| 10444658 | Clic1                     | N/A | N/A |
| 10444685 | Bat5                      | N/A | N/A |
| 10444713 | Bat4                      | N/A | N/A |
| 10444717 | D17H6S53E                 | N/A | N/A |
| 10444756 | Atp6v1g2                  | N/A | N/A |
| 10444761 | Bat1a                     | N/A | N/A |
| 10444778 | ---                       | N/A | N/A |
| 10444780 | H2-L /// H2-D1            | N/A | N/A |
| 10444800 | Nhp2l1                    | N/A | N/A |
| 10444802 | H2-Q2 /// H2-Q1           | N/A | N/A |
| 10444810 | Gm6571 /// H2-Q1          | N/A | N/A |
| 10444814 | H2-gs10 /// H2-Q5         | N/A | N/A |
| 10444821 | H2-Q8                     | N/A | N/A |
| 10444824 | LOC68395 /// H2-Q6        | N/A | N/A |
| 10444830 | H2-Q7 /// H2-Q6 /// H2-Q8 | N/A | N/A |
| 10444841 | H2-Q10                    | N/A | N/A |
| 10444883 | Cdsn                      | N/A | N/A |
| 10444890 | Ier3                      | N/A | N/A |
| 10444895 | Flot1                     | N/A | N/A |
| 10444911 | Mdc1                      | N/A | N/A |
| 10444927 | Nrm                       | N/A | N/A |
| 10444936 | Dhx16                     | N/A | N/A |
| 10444957 | Ppp1r10                   | N/A | N/A |
| 10444978 | Gn1                       | N/A | N/A |
| 10444995 | ---                       | N/A | N/A |
| 10445006 | Akirin1 /// Gm6623        | N/A | N/A |
| 10445008 | Lsm5                      | N/A | N/A |
| 10445033 | Trim26                    | N/A | N/A |
| 10445061 | Rnf39                     | N/A | N/A |
| 10445067 | Znrd1as                   | N/A | N/A |
| 10445071 | Zfp57                     | N/A | N/A |
| 10445078 | Gabbr1                    | N/A | N/A |
| 10445107 | Gm4831                    | N/A | N/A |
| 10445117 | Olf96                     | N/A | N/A |
| 10445135 | Olf108                    | N/A | N/A |
| 10445137 | Olf109                    | N/A | N/A |
| 10445139 | Olf110                    | N/A | N/A |
| 10445141 | Olf111                    | N/A | N/A |
| 10445151 | Olf120                    | N/A | N/A |
| 10445156 | Olf123                    | N/A | N/A |
| 10445165 | Olf127                    | N/A | N/A |
| 10445172 | Olf130                    | N/A | N/A |
| 10445183 | Olf136                    | N/A | N/A |
| 10445185 | Rn18s                     | N/A | N/A |
| 10445214 | Mut /// Cenpq             | N/A | N/A |
| 10445229 | ---                       | N/A | N/A |
| 10445232 | 3110082D06Rik             | N/A | N/A |
| 10445235 | Gm9753                    | N/A | N/A |
| 10445237 | 3110082D06Rik             | N/A | N/A |
| 10445239 | Gm5978                    | N/A | N/A |
| 10445241 | Tnfrsf21                  | N/A | N/A |
| 10445251 | Gpr110                    | N/A | N/A |
| 10445268 | Gpr116                    | N/A | N/A |
| 10445291 | ---                       | N/A | N/A |
| 10445293 | Pla2g7                    | N/A | N/A |
| 10445323 | ---                       | N/A | N/A |
| 10445325 | Rcan2                     | N/A | N/A |
| 10445338 | Enpp5                     | N/A | N/A |
| 10445347 | Clic5                     | N/A | N/A |
| 10445360 | Supt3h                    | N/A | N/A |
| 10445373 | B230354K17Rik             | N/A | N/A |
| 10445376 | Rpl21                     | N/A | N/A |
| 10445407 | Tcte1 /// Tmem151b        | N/A | N/A |
| 10445428 | ---                       | N/A | N/A |
| 10445430 | Mrpl14                    | N/A | N/A |
| 10445434 | Mrps18a                   | N/A | N/A |
| 10445442 | Gtpbp2                    | N/A | N/A |
| 10445458 | Xpo5                      | N/A | N/A |
| 10445494 | Mir693                    | N/A | N/A |
| 10445496 | Yipf3                     | N/A | N/A |
| 10445531 | Zfp318                    | N/A | N/A |
| 10445542 | ---                       | N/A | N/A |
| 10445544 | Crip3                     | N/A | N/A |
| 10445558 | BC048355                  | N/A | N/A |
| 10445565 | Mrpl2                     | N/A | N/A |
| 10445601 | Mea1                      | N/A | N/A |
| 10445607 | Pex6                      | N/A | N/A |
| 10445627 | 2310039H08Rik             | N/A | N/A |
| 10445638 | Ubr2                      | N/A | N/A |

|          |                              |     |     |
|----------|------------------------------|-----|-----|
| 10445640 | Trerf1                       | N/A | N/A |
| 10445664 | Guca1b                       | N/A | N/A |
| 10445670 | Mrps10                       | N/A | N/A |
| 10445674 | Mrfap1                       | N/A | N/A |
| 10445678 | Al661453 /// 1700001C19Rik   | N/A | N/A |
| 10445695 | Med20                        | N/A | N/A |
| 10445702 | Usp49                        | N/A | N/A |
| 10445741 | ---                          | N/A | N/A |
| 10445781 | Trem2                        | N/A | N/A |
| 10445796 | Al314976                     | N/A | N/A |
| 10445824 | ---                          | N/A | N/A |
| 10445826 | Mocs1                        | N/A | N/A |
| 10445867 | Plcl2                        | N/A | N/A |
| 10445875 | Btg3 /// Gm7334              | N/A | N/A |
| 10445877 | Gm16489                      | N/A | N/A |
| 10445879 | Kcnh8                        | N/A | N/A |
| 10445891 | ---                          | N/A | N/A |
| 10445894 | Erh                          | N/A | N/A |
| 10445898 | Rab5a                        | N/A | N/A |
| 10445909 | Kat2b                        | N/A | N/A |
| 10445941 | ---                          | N/A | N/A |
| 10445944 | St6gal2                      | N/A | N/A |
| 10445972 | BC011426                     | N/A | N/A |
| 10446001 | Fsd1                         | N/A | N/A |
| 10446013 | Mpnd                         | N/A | N/A |
| 10446063 | Tnfaip8l1                    | N/A | N/A |
| 10446066 | A230051N06Rik                | N/A | N/A |
| 10446069 | Mir7b                        | N/A | N/A |
| 10446071 | Fem1a                        | N/A | N/A |
| 10446084 | Kdm4b                        | N/A | N/A |
| 10446131 | Rpl36 /// Gm13611 /// Gm5745 | N/A | N/A |
| 10446149 | Ranbp3                       | N/A | N/A |
| 10446166 | Ndufa11                      | N/A | N/A |
| 10446172 | Dus3l                        | N/A | N/A |
| 10446207 | Clpp                         | N/A | N/A |
| 10446214 | Alkbh7                       | N/A | N/A |
| 10446309 | Cntnap5c                     | N/A | N/A |
| 10446312 | Cntnap5c                     | N/A | N/A |
| 10446334 | Glcc1                        | N/A | N/A |
| 10446341 | ---                          | N/A | N/A |
| 10446344 | ---                          | N/A | N/A |
| 10446351 | Fert2                        | N/A | N/A |
| 10446376 | Man2a1                       | N/A | N/A |
| 10446423 | 5430411C19Rik                | N/A | N/A |
| 10446425 | ---                          | N/A | N/A |
| 10446427 | ORF19                        | N/A | N/A |
| 10446549 | Tmem200c                     | N/A | N/A |
| 10446553 | Epb4.1l3                     | N/A | N/A |
| 10446581 | Zfp161                       | N/A | N/A |
| 10446587 | C030034l22Rik                | N/A | N/A |
| 10446592 | Dlgap1                       | N/A | N/A |
| 10446594 | ---                          | N/A | N/A |
| 10446596 | Dlgap1                       | N/A | N/A |
| 10446613 | Gm16519                      | N/A | N/A |
| 10446615 | Rps24 /// Gm6030             | N/A | N/A |
| 10446617 | ---                          | N/A | N/A |
| 10446656 | Lpin2                        | N/A | N/A |
| 10446713 | Snord53                      | N/A | N/A |
| 10446739 | Clip4                        | N/A | N/A |
| 10446756 | Ypel5                        | N/A | N/A |
| 10446763 | Lbh                          | N/A | N/A |
| 10446771 | Lclat1                       | N/A | N/A |
| 10446777 | Ehd3                         | N/A | N/A |
| 10446785 | Spast                        | N/A | N/A |
| 10446804 | Slc30a6                      | N/A | N/A |
| 10446821 | Rps6 /// Gm16409             | N/A | N/A |
| 10446833 | Birc6                        | N/A | N/A |
| 10446907 | Ttc27                        | N/A | N/A |
| 10446965 | Rasgrp3                      | N/A | N/A |
| 10446984 | ---                          | N/A | N/A |
| 10446986 | Crim1                        | N/A | N/A |
| 10447004 | Hdac1                        | N/A | N/A |
| 10447023 | Heatr5b                      | N/A | N/A |
| 10447025 | Ccdc75                       | N/A | N/A |
| 10447036 | ---                          | N/A | N/A |
| 10447038 | 1110001A16Rik /// Cebpz      | N/A | N/A |
| 10447056 | Qpct                         | N/A | N/A |
| 10447065 | Fam82a1                      | N/A | N/A |
| 10447079 | ---                          | N/A | N/A |
| 10447082 | Cyp1b1                       | N/A | N/A |
| 10447084 | Galm                         | N/A | N/A |
| 10447097 | Gemin6                       | N/A | N/A |
| 10447100 | Morn2 /// Dhx57              | N/A | N/A |
| 10447118 | Gm9959                       | N/A | N/A |

|          |                                                          |     |     |
|----------|----------------------------------------------------------|-----|-----|
| 10447120 | Tmem178                                                  | N/A | N/A |
| 10447125 | ---                                                      | N/A | N/A |
| 10447128 | Gm6594                                                   | N/A | N/A |
| 10447130 | Pkdcc                                                    | N/A | N/A |
| 10447139 | Rpl21 /// Gm6813 /// Rpl21-ps4 /// Rpl21-ps7 /// Gm16416 | N/A | N/A |
| 10447167 | Mta3                                                     | N/A | N/A |
| 10447188 | Mta3                                                     | N/A | N/A |
| 10447222 | ---                                                      | N/A | N/A |
| 10447224 | Dync2li1                                                 | N/A | N/A |
| 10447239 | Abcg8                                                    | N/A | N/A |
| 10447264 | Prepl /// Slc3a1                                         | N/A | N/A |
| 10447275 | 1700106N22Rik                                            | N/A | N/A |
| 10447286 | Rpl31                                                    | N/A | N/A |
| 10447294 | Prkce                                                    | N/A | N/A |
| 10447315 | ---                                                      | N/A | N/A |
| 10447317 | Epas1                                                    | N/A | N/A |
| 10447337 | 1700090G07Rik                                            | N/A | N/A |
| 10447341 | Rhoq /// Pigf                                            | N/A | N/A |
| 10447349 | Cript                                                    | N/A | N/A |
| 10447354 | Tmx2                                                     | N/A | N/A |
| 10447356 | Socs5                                                    | N/A | N/A |
| 10447361 | Ttc7                                                     | N/A | N/A |
| 10447395 | Msh2                                                     | N/A | N/A |
| 10447412 | ---                                                      | N/A | N/A |
| 10447415 | ---                                                      | N/A | N/A |
| 10447431 | Foxn2                                                    | N/A | N/A |
| 10447437 | Klraq1                                                   | N/A | N/A |
| 10447461 | Ston1                                                    | N/A | N/A |
| 10447477 | Gm10493                                                  | N/A | N/A |
| 10447480 | Nrxn1 /// Gm10308                                        | N/A | N/A |
| 10447483 | Nanp                                                     | N/A | N/A |
| 10447486 | ---                                                      | N/A | N/A |
| 10447490 | Pja2                                                     | N/A | N/A |
| 10447502 | Adcyap1                                                  | N/A | N/A |
| 10447513 | ---                                                      | N/A | N/A |
| 10447515 | U2af1                                                    | N/A | N/A |
| 10447517 | Pisd-ps2                                                 | N/A | N/A |
| 10447521 | Tfb1m /// Tiam2                                          | N/A | N/A |
| 10447551 | 5730437N04Rik                                            | N/A | N/A |
| 10447557 | Ldhal6b                                                  | N/A | N/A |
| 10447564 | Zdhhc14                                                  | N/A | N/A |
| 10447566 | Atp5g2                                                   | N/A | N/A |
| 10447569 | Serac1 /// Synj2                                         | N/A | N/A |
| 10447589 | Fbl                                                      | N/A | N/A |
| 10447591 | Ft2 /// Ft1                                              | N/A | N/A |
| 10447594 | Dynlt1a /// Dynlt1b /// Dynlt1f /// Dynlt1c /// Dynlt1e  | N/A | N/A |
| 10447617 | Mir692-1                                                 | N/A | N/A |
| 10447619 | Rsph3a /// Rsph3b                                        | N/A | N/A |
| 10447629 | Tagap /// Tagap1                                         | N/A | N/A |
| 10447634 | Unc93a /// Gm9992                                        | N/A | N/A |
| 10447643 | ---                                                      | N/A | N/A |
| 10447645 | 5830477G23Rik                                            | N/A | N/A |
| 10447647 | Gpr31c                                                   | N/A | N/A |
| 10447668 | Gm1604b /// Gm1604A                                      | N/A | N/A |
| 10447688 | ---                                                      | N/A | N/A |
| 10447691 | ---                                                      | N/A | N/A |
| 10447693 | ---                                                      | N/A | N/A |
| 10447695 | ---                                                      | N/A | N/A |
| 10447697 | 6530411M01Rik                                            | N/A | N/A |
| 10447699 | ---                                                      | N/A | N/A |
| 10447702 | Pp1h /// Gm10069                                         | N/A | N/A |
| 10447708 | Qk                                                       | N/A | N/A |
| 10447729 | Qk                                                       | N/A | N/A |
| 10447740 | Gm10513                                                  | N/A | N/A |
| 10447786 | Slc22a1                                                  | N/A | N/A |
| 10447799 | Igf2r                                                    | N/A | N/A |
| 10447880 | Mrpl18                                                   | N/A | N/A |
| 10447897 | Wtap                                                     | N/A | N/A |
| 10447902 | Gpr31c                                                   | N/A | N/A |
| 10447915 | ---                                                      | N/A | N/A |
| 10447919 | ---                                                      | N/A | N/A |
| 10447921 | ---                                                      | N/A | N/A |
| 10447933 | LOC100505091                                             | N/A | N/A |
| 10447935 | Gm7168                                                   | N/A | N/A |
| 10448004 | Phf10 /// 1600012H06Rik                                  | N/A | N/A |
| 10448030 | ---                                                      | N/A | N/A |
| 10448032 | Gm10510                                                  | N/A | N/A |
| 10448055 | Pdcd2                                                    | N/A | N/A |
| 10448062 | ---                                                      | N/A | N/A |
| 10448079 | ---                                                      | N/A | N/A |
| 10448089 | Oaz1 /// Gm9786                                          | N/A | N/A |
| 10448094 | Lnpep                                                    | N/A | N/A |
| 10448117 | Has1                                                     | N/A | N/A |
| 10448127 | ---                                                      | N/A | N/A |

|          |                                 |     |     |
|----------|---------------------------------|-----|-----|
| 10448168 | Fpr-rs3                         | N/A | N/A |
| 10448178 | Vmn1r232                        | N/A | N/A |
| 10448180 | Vmn1r233                        | N/A | N/A |
| 10448182 | Mir703                          | N/A | N/A |
| 10448184 | 4930515G13Rik                   | N/A | N/A |
| 10448192 | ---                             | N/A | N/A |
| 10448195 | 3110048L19Rik                   | N/A | N/A |
| 10448202 | Tpm4                            | N/A | N/A |
| 10448212 | ---                             | N/A | N/A |
| 10448214 | 3110048L19Rik /// 6330416L07Rik | N/A | N/A |
| 10448224 | Vmn2r111                        | N/A | N/A |
| 10448230 | LOC280487                       | N/A | N/A |
| 10448232 | Gm16386                         | N/A | N/A |
| 10448235 | A630033E08Rik                   | N/A | N/A |
| 10448247 | Zfp40                           | N/A | N/A |
| 10448257 | Gm5146                          | N/A | N/A |
| 10448262 | Zfp213                          | N/A | N/A |
| 10448369 | Flywch1                         | N/A | N/A |
| 10448380 | Tceb2                           | N/A | N/A |
| 10448424 | Pdpk1                           | N/A | N/A |
| 10448455 | Atp6v0c                         | N/A | N/A |
| 10448459 | Tbc1d24                         | N/A | N/A |
| 10448495 | 1600002H07Rik                   | N/A | N/A |
| 10448557 | Abca3                           | N/A | N/A |
| 10448582 | Mlst8                           | N/A | N/A |
| 10448593 | Traf7                           | N/A | N/A |
| 10448631 | Tsc2                            | N/A | N/A |
| 10448694 | Syng3                           | N/A | N/A |
| 10448700 | Gfer /// Dst                    | N/A | N/A |
| 10448707 | Tbl3                            | N/A | N/A |
| 10448743 | Fahd1                           | N/A | N/A |
| 10448748 | Nubp2                           | N/A | N/A |
| 10448755 | Eme2 /// Mapk8ip3               | N/A | N/A |
| 10448765 | Mapk8ip3                        | N/A | N/A |
| 10448836 | Tmem204                         | N/A | N/A |
| 10448865 | Gnptg                           | N/A | N/A |
| 10448878 | Baiap3                          | N/A | N/A |
| 10448912 | Ube2i                           | N/A | N/A |
| 10448973 | ---                             | N/A | N/A |
| 10448998 | Msini                           | N/A | N/A |
| 10449018 | Haghl /// Narfl                 | N/A | N/A |
| 10449034 | Fam173a                         | N/A | N/A |
| 10449051 | Stub1 /// Jmjd8                 | N/A | N/A |
| 10449142 | Fam195a                         | N/A | N/A |
| 10449148 | Wfikkn1                         | N/A | N/A |
| 10449152 | Rab40c                          | N/A | N/A |
| 10449191 | Solh                            | N/A | N/A |
| 10449207 | Rab11fip3                       | N/A | N/A |
| 10449225 | Decr2                           | N/A | N/A |
| 10449258 | Arhgdig                         | N/A | N/A |
| 10449266 | Iltf3                           | N/A | N/A |
| 10449284 | Dusp1                           | N/A | N/A |
| 10449289 | 1700049J03Rik                   | N/A | N/A |
| 10449292 | Nkx2-5                          | N/A | N/A |
| 10449295 | Cuta                            | N/A | N/A |
| 10449303 | Bak1                            | N/A | N/A |
| 10449312 | ---                             | N/A | N/A |
| 10449315 | 2900010M23Rik                   | N/A | N/A |
| 10449327 | Lemd2                           | N/A | N/A |
| 10449343 | Grm4                            | N/A | N/A |
| 10449356 | A413582                         | N/A | N/A |
| 10449363 | Nudt3 /// Anks1                 | N/A | N/A |
| 10449370 | Rps10                           | N/A | N/A |
| 10449394 | Taf11                           | N/A | N/A |
| 10449415 | C230013L11Rik                   | N/A | N/A |
| 10449471 | Srpk1                           | N/A | N/A |
| 10449523 | Pxt1                            | N/A | N/A |
| 10449527 | Stk38                           | N/A | N/A |
| 10449545 | ---                             | N/A | N/A |
| 10449547 | ---                             | N/A | N/A |
| 10449549 | Rpl35a /// Ino80 /// Gm10247    | N/A | N/A |
| 10449551 | Cpne5                           | N/A | N/A |
| 10449581 | Mtch1                           | N/A | N/A |
| 10449596 | ---                             | N/A | N/A |
| 10449598 | Tmem217                         | N/A | N/A |
| 10449602 | 1110021J02Rik                   | N/A | N/A |
| 10449631 | Btbd9                           | N/A | N/A |
| 10449644 | Glo1                            | N/A | N/A |
| 10449652 | Dnahc8 /// Gm9937               | N/A | N/A |
| 10449654 | Gm10503                         | N/A | N/A |
| 10449657 | Tff3                            | N/A | N/A |
| 10449697 | Gm9902                          | N/A | N/A |
| 10449712 | Cbs                             | N/A | N/A |
| 10449731 | U2af1                           | N/A | N/A |

|          |                    |     |     |
|----------|--------------------|-----|-----|
| 10449741 | Sik1               | N/A | N/A |
| 10449815 | Brd4               | N/A | N/A |
| 10449839 | Akap8              | N/A | N/A |
| 10449854 | Akap8l             | N/A | N/A |
| 10449873 | Wiz                | N/A | N/A |
| 10449920 | Zfp811             | N/A | N/A |
| 10449926 | Zfp799             | N/A | N/A |
| 10449955 | Cyp4f13            | N/A | N/A |
| 10449971 | Zfp763             | N/A | N/A |
| 10449977 | 4921501E09Rik      | N/A | N/A |
| 10449979 | Morc2b             | N/A | N/A |
| 10449989 | Zfp422             | N/A | N/A |
| 10449999 | Zfp101             | N/A | N/A |
| 10450006 | Hnrnpm /// March2  | N/A | N/A |
| 10450055 | H2-Ke2             | N/A | N/A |
| 10450059 | B3galt4            | N/A | N/A |
| 10450063 | Rps18 /// Gm10260  | N/A | N/A |
| 10450089 | Ring1              | N/A | N/A |
| 10450101 | Mir219-1           | N/A | N/A |
| 10450103 | H2-Ke6             | N/A | N/A |
| 10450116 | Slc39a7            | N/A | N/A |
| 10450126 | Brd2               | N/A | N/A |
| 10450154 | H2-Aa              | N/A | N/A |
| 10450189 | Btnl5              | N/A | N/A |
| 10450197 | Btnl5              | N/A | N/A |
| 10450206 | Rnf5               | N/A | N/A |
| 10450224 | ---                | N/A | N/A |
| 10450226 | Ppt2               | N/A | N/A |
| 10450242 | C4a /// C4b        | N/A | N/A |
| 10450265 | Stk19              | N/A | N/A |
| 10450325 | Cfb                | N/A | N/A |
| 10450344 | C2                 | N/A | N/A |
| 10450363 | Snord52            | N/A | N/A |
| 10450365 | ---                | N/A | N/A |
| 10450367 | Hspa1b /// Hspa1a  | N/A | N/A |
| 10450369 | Hspa1a             | N/A | N/A |
| 10450372 | Hspa1l             | N/A | N/A |
| 10450435 | Csnk2b             | N/A | N/A |
| 10450444 | Apom               | N/A | N/A |
| 10450451 | Bat2               | N/A | N/A |
| 10450482 | ---                | N/A | N/A |
| 10450514 | Nfkbil1            | N/A | N/A |
| 10450519 | Tcf19              | N/A | N/A |
| 10450579 | Ddr1               | N/A | N/A |
| 10450603 | ---                | N/A | N/A |
| 10450605 | Tubb5              | N/A | N/A |
| 10450614 | 2310061I04Rik      | N/A | N/A |
| 10450622 | Atat1              | N/A | N/A |
| 10450640 | Mrps18b            | N/A | N/A |
| 10450646 | Rbx1               | N/A | N/A |
| 10450648 | Abcf1              | N/A | N/A |
| 10450669 | Prr3               | N/A | N/A |
| 10450675 | H2-T24             | N/A | N/A |
| 10450694 | H2-T22             | N/A | N/A |
| 10450733 | H2-t9 /// EG547347 | N/A | N/A |
| 10450744 | ---                | N/A | N/A |
| 10450752 | Trim39             | N/A | N/A |
| 10450762 | H2-M10.2           | N/A | N/A |
| 10450777 | ---                | N/A | N/A |
| 10450796 | Armcx5             | N/A | N/A |
| 10450798 | ---                | N/A | N/A |
| 10450814 | Ppp1r11            | N/A | N/A |
| 10450843 | H2-M5              | N/A | N/A |
| 10450852 | Olf90              | N/A | N/A |
| 10450854 | Olf91              | N/A | N/A |
| 10450856 | Olf92              | N/A | N/A |
| 10450858 | Olf93              | N/A | N/A |
| 10450860 | Olf90 /// Olf92    | N/A | N/A |
| 10450862 | Olf94              | N/A | N/A |
| 10450864 | Olf95              | N/A | N/A |
| 10450870 | ---                | N/A | N/A |
| 10450874 | Olf101             | N/A | N/A |
| 10450876 | Olf100 /// Olf102  | N/A | N/A |
| 10450878 | Olf103             | N/A | N/A |
| 10450895 | Olf114             | N/A | N/A |
| 10450900 | Olf116             | N/A | N/A |
| 10450902 | Olf117             | N/A | N/A |
| 10450904 | Scoc               | N/A | N/A |
| 10450906 | Olf127             | N/A | N/A |
| 10450910 | Olf131             | N/A | N/A |
| 10450912 | Olf132             | N/A | N/A |
| 10450914 | Olf137             | N/A | N/A |
| 10450920 | AY036118           | N/A | N/A |
| 10451004 | Cd2ap              | N/A | N/A |

|          |                                                                         |     |     |
|----------|-------------------------------------------------------------------------|-----|-----|
| 10451039 | Slc25a27                                                                | N/A | N/A |
| 10451052 | Gm10498                                                                 | N/A | N/A |
| 10451077 | ---                                                                     | N/A | N/A |
| 10451079 | 4930564C03Rik                                                           | N/A | N/A |
| 10451081 | Ccdc94                                                                  | N/A | N/A |
| 10451110 | Hsp90ab1                                                                | N/A | N/A |
| 10451123 | Slc29a1                                                                 | N/A | N/A |
| 10451142 | Gm7325                                                                  | N/A | N/A |
| 10451167 | Tmem63b                                                                 | N/A | N/A |
| 10451193 | E030047D23Rik                                                           | N/A | N/A |
| 10451198 | Vegfa                                                                   | N/A | N/A |
| 10451225 | Polh                                                                    | N/A | N/A |
| 10451238 | Polr1c                                                                  | N/A | N/A |
| 10451291 | Slc22a7                                                                 | N/A | N/A |
| 10451303 | Ttbk1                                                                   | N/A | N/A |
| 10451363 | Srf                                                                     | N/A | N/A |
| 10451395 | Klc4                                                                    | N/A | N/A |
| 10451413 | Rrp36                                                                   | N/A | N/A |
| 10451421 | Klhdc3                                                                  | N/A | N/A |
| 10451434 | Ppp2r5d                                                                 | N/A | N/A |
| 10451451 | Gnmt                                                                    | N/A | N/A |
| 10451458 | Cnpy3                                                                   | N/A | N/A |
| 10451472 | Rpl7l1                                                                  | N/A | N/A |
| 10451481 | BC032203                                                                | N/A | N/A |
| 10451493 | A330017A19Rik                                                           | N/A | N/A |
| 10451495 | Ubr2                                                                    | N/A | N/A |
| 10451547 | ---                                                                     | N/A | N/A |
| 10451549 | Gm4945                                                                  | N/A | N/A |
| 10451559 | A1661453 /// 1700001C19Rik                                              | N/A | N/A |
| 10451580 | Bysl                                                                    | N/A | N/A |
| 10451591 | Tomm6 /// Prickle4                                                      | N/A | N/A |
| 10451597 | Prickle4                                                                | N/A | N/A |
| 10451611 | ---                                                                     | N/A | N/A |
| 10451650 | Nfya                                                                    | N/A | N/A |
| 10451675 | ---                                                                     | N/A | N/A |
| 10451677 | ---                                                                     | N/A | N/A |
| 10451708 | 4930566A20Rik                                                           | N/A | N/A |
| 10451710 | Rftn1                                                                   | N/A | N/A |
| 10451736 | Tbc1d5                                                                  | N/A | N/A |
| 10451761 | Tbc1d5                                                                  | N/A | N/A |
| 10451763 | Satb1                                                                   | N/A | N/A |
| 10451784 | Kcnh8                                                                   | N/A | N/A |
| 10451879 | Zfp119a                                                                 | N/A | N/A |
| 10451884 | Rpl21 /// Rpl21-ps4 /// Rpl21-ps6                                       | N/A | N/A |
| 10451893 | Stap2                                                                   | N/A | N/A |
| 10451907 | Sh3gl1                                                                  | N/A | N/A |
| 10451932 | Plin4                                                                   | N/A | N/A |
| 10451943 | Plin5                                                                   | N/A | N/A |
| 10451953 | Lrg1                                                                    | N/A | N/A |
| 10451955 | Sema6b                                                                  | N/A | N/A |
| 10451974 | Sema6b                                                                  | N/A | N/A |
| 10451993 | D17Wsu104e                                                              | N/A | N/A |
| 10452022 | Ticam1                                                                  | N/A | N/A |
| 10452030 | Plin3                                                                   | N/A | N/A |
| 10452043 | Arrdc5                                                                  | N/A | N/A |
| 10452047 | Ptpns                                                                   | N/A | N/A |
| 10452085 | Safb2                                                                   | N/A | N/A |
| 10452087 | Safb2                                                                   | N/A | N/A |
| 10452110 | 2410015M20Rik                                                           | N/A | N/A |
| 10452118 | Lonp1                                                                   | N/A | N/A |
| 10452188 | Mllt1                                                                   | N/A | N/A |
| 10452213 | Gtf2f1                                                                  | N/A | N/A |
| 10452228 | Khsrp                                                                   | N/A | N/A |
| 10452257 | Slc25a23                                                                | N/A | N/A |
| 10452316 | C3                                                                      | N/A | N/A |
| 10452356 | Gpr108                                                                  | N/A | N/A |
| 10452384 | Rpl7a /// Rpl7a-ps3 /// Rpl7a-ps5 /// Gm5619 /// Gm16477 /// Rpl7a-ps10 | N/A | N/A |
| 10452404 | Nudt12                                                                  | N/A | N/A |
| 10452415 | Gapdh /// Gm2451                                                        | N/A | N/A |
| 10452417 | ---                                                                     | N/A | N/A |
| 10452419 | Efna5                                                                   | N/A | N/A |
| 10452427 | ---                                                                     | N/A | N/A |
| 10452430 | Fbxl17                                                                  | N/A | N/A |
| 10452440 | A930002H24Rik                                                           | N/A | N/A |
| 10452442 | AU016765                                                                | N/A | N/A |
| 10452468 | Mrps10                                                                  | N/A | N/A |
| 10452470 | Vapa                                                                    | N/A | N/A |
| 10452480 | Txndc2                                                                  | N/A | N/A |
| 10452485 | Rab31                                                                   | N/A | N/A |
| 10452496 | Ralbp1                                                                  | N/A | N/A |
| 10452508 | Twsg1                                                                   | N/A | N/A |
| 10452516 | Ankrd12                                                                 | N/A | N/A |
| 10452525 | Ndufv2                                                                  | N/A | N/A |
| 10452535 | ---                                                                     | N/A | N/A |

|          |                                                          |     |     |
|----------|----------------------------------------------------------|-----|-----|
| 10452538 | 1110012J17Rik                                            | N/A | N/A |
| 10452556 | Rab12                                                    | N/A | N/A |
| 10452571 | Ptpm                                                     | N/A | N/A |
| 10452639 | Myl12b                                                   | N/A | N/A |
| 10452643 | 2900073G15Rik                                            | N/A | N/A |
| 10452658 | Smchd1                                                   | N/A | N/A |
| 10452701 | Smchd1                                                   | N/A | N/A |
| 10452721 | Trmt61b                                                  | N/A | N/A |
| 10452766 | ---                                                      | N/A | N/A |
| 10452768 | ---                                                      | N/A | N/A |
| 10452815 | Xdh                                                      | N/A | N/A |
| 10452854 | Srd5a2                                                   | N/A | N/A |
| 10452867 | Dpy30                                                    | N/A | N/A |
| 10452874 | Atp6v1f                                                  | N/A | N/A |
| 10452890 | Tceb2                                                    | N/A | N/A |
| 10452892 | Fam98a                                                   | N/A | N/A |
| 10452901 | ---                                                      | N/A | N/A |
| 10452903 | ---                                                      | N/A | N/A |
| 10452907 | Fez2                                                     | N/A | N/A |
| 10452918 | Strn                                                     | N/A | N/A |
| 10452935 | Heatr5b                                                  | N/A | N/A |
| 10452937 | Heatr5b                                                  | N/A | N/A |
| 10452978 | Gm6548                                                   | N/A | N/A |
| 10452980 | Eif2ak2                                                  | N/A | N/A |
| 10453006 | Cebpz                                                    | N/A | N/A |
| 10453026 | Prkd3                                                    | N/A | N/A |
| 10453047 | ---                                                      | N/A | N/A |
| 10453049 | Cdc42ep3                                                 | N/A | N/A |
| 10453055 | Gm10494                                                  | N/A | N/A |
| 10453062 | Atl2                                                     | N/A | N/A |
| 10453082 | Hnrpll                                                   | N/A | N/A |
| 10453102 | Srsf7                                                    | N/A | N/A |
| 10453114 | Dhx57 /// Morn2                                          | N/A | N/A |
| 10453139 | Gm10190                                                  | N/A | N/A |
| 10453141 | Sos1                                                     | N/A | N/A |
| 10453178 | Map4k3                                                   | N/A | N/A |
| 10453214 | Nutf2 /// Nutf2-ps1                                      | N/A | N/A |
| 10453231 | Slc8a1                                                   | N/A | N/A |
| 10453233 | Slc8a1                                                   | N/A | N/A |
| 10453248 | ---                                                      | N/A | N/A |
| 10453250 | ---                                                      | N/A | N/A |
| 10453252 | Hmgb1                                                    | N/A | N/A |
| 10453254 | Cox7a2l                                                  | N/A | N/A |
| 10453260 | Hao                                                      | N/A | N/A |
| 10453272 | Zfp3612                                                  | N/A | N/A |
| 10453276 | Thada                                                    | N/A | N/A |
| 10453318 | Abcg5                                                    | N/A | N/A |
| 10453334 | Lrpprc                                                   | N/A | N/A |
| 10453373 | Prepl /// Slc3a1                                         | N/A | N/A |
| 10453390 | Six3os1                                                  | N/A | N/A |
| 10453399 | Srbd1                                                    | N/A | N/A |
| 10453423 | Gm10309                                                  | N/A | N/A |
| 10453451 | Calm2                                                    | N/A | N/A |
| 10453456 | Kcnk12                                                   | N/A | N/A |
| 10453459 | Pnk                                                      | N/A | N/A |
| 10453461 | Fbxo11                                                   | N/A | N/A |
| 10453485 | ---                                                      | N/A | N/A |
| 10453512 | Kpna2                                                    | N/A | N/A |
| 10453518 | Nrxn1                                                    | N/A | N/A |
| 10453542 | ---                                                      | N/A | N/A |
| 10453544 | Mettl4                                                   | N/A | N/A |
| 10453553 | LOC100038746                                             | N/A | N/A |
| 10453555 | 2610044015Rik                                            | N/A | N/A |
| 10453560 | ---                                                      | N/A | N/A |
| 10453562 | Sft2d1                                                   | N/A | N/A |
| 10453573 | Olfrc63                                                  | N/A | N/A |
| 10453600 | ---                                                      | N/A | N/A |
| 10453602 | ---                                                      | N/A | N/A |
| 10453604 | Bambi                                                    | N/A | N/A |
| 10453616 | Mtpap                                                    | N/A | N/A |
| 10453627 | ---                                                      | N/A | N/A |
| 10453629 | 9430020K01Rik                                            | N/A | N/A |
| 10453632 | Rpl7a /// Rpl7a-ps3 /// Rpl7a-ps5 /// Gm5619 /// Gm16477 | N/A | N/A |
| 10453634 | Gm10556                                                  | N/A | N/A |
| 10453676 | ---                                                      | N/A | N/A |
| 10453678 | Zeb1                                                     | N/A | N/A |
| 10453688 | ---                                                      | N/A | N/A |
| 10453690 | Rpl27                                                    | N/A | N/A |
| 10453692 | Vps24                                                    | N/A | N/A |
| 10453705 | Rab18                                                    | N/A | N/A |
| 10453715 | ---                                                      | N/A | N/A |
| 10453717 | Fabp512                                                  | N/A | N/A |
| 10453732 | ---                                                      | N/A | N/A |
| 10453734 | ---                                                      | N/A | N/A |



|          |                                          |     |     |
|----------|------------------------------------------|-----|-----|
| 10453736 | Unkl                                     | N/A | N/A |
| 10453738 | Fzd8                                     | N/A | N/A |
| 10453747 | Colec12                                  | N/A | N/A |
| 10453759 | Gm10554                                  | N/A | N/A |
| 10453761 | ---                                      | N/A | N/A |
| 10453764 | ---                                      | N/A | N/A |
| 10453797 | Greb1l                                   | N/A | N/A |
| 10453811 | Greb1l                                   | N/A | N/A |
| 10453825 | Snrpd1                                   | N/A | N/A |
| 10453830 | Mib1                                     | N/A | N/A |
| 10453855 | ---                                      | N/A | N/A |
| 10453857 | Gata6                                    | N/A | N/A |
| 10453887 | Cables1                                  | N/A | N/A |
| 10453900 | Riok3                                    | N/A | N/A |
| 10453918 | 3110002H16Rik                            | N/A | N/A |
| 10454015 | Ttc39c                                   | N/A | N/A |
| 10454039 | Impact                                   | N/A | N/A |
| 10454057 | ---                                      | N/A | N/A |
| 10454059 | ---                                      | N/A | N/A |
| 10454061 | ---                                      | N/A | N/A |
| 10454063 | Rsl24d1                                  | N/A | N/A |
| 10454077 | Taf4b                                    | N/A | N/A |
| 10454093 | Mrpl27                                   | N/A | N/A |
| 10454095 | ---                                      | N/A | N/A |
| 10454097 | Rpl11 /// Gm7589 /// Gm10288 /// Gm10036 | N/A | N/A |
| 10454099 | Morf4l1                                  | N/A | N/A |
| 10454103 | ---                                      | N/A | N/A |
| 10454105 | Dsg1c                                    | N/A | N/A |
| 10454192 | Ttr                                      | N/A | N/A |
| 10454202 | Rnf138                                   | N/A | N/A |
| 10454229 | Klh14                                    | N/A | N/A |
| 10454235 | Asxl3                                    | N/A | N/A |
| 10454252 | ---                                      | N/A | N/A |
| 10454254 | Dtna                                     | N/A | N/A |
| 10454286 | Mapre2                                   | N/A | N/A |
| 10454296 | Rpl19                                    | N/A | N/A |
| 10454298 | Zfp397                                   | N/A | N/A |
| 10454306 | Zfp35                                    | N/A | N/A |
| 10454310 | Galnt1                                   | N/A | N/A |
| 10454332 | Elp2                                     | N/A | N/A |
| 10454353 | Mocos                                    | N/A | N/A |
| 10454398 | AW554918                                 | N/A | N/A |
| 10454411 | Hnrnpa1 /// Gm10052 /// Gm5643           | N/A | N/A |
| 10454414 | Pik3c3                                   | N/A | N/A |
| 10454441 | Syt4                                     | N/A | N/A |
| 10454445 | Slc25a46                                 | N/A | N/A |
| 10454447 | Sap130                                   | N/A | N/A |
| 10454469 | Ammeccr1l                                | N/A | N/A |
| 10454478 | Polr2d                                   | N/A | N/A |
| 10454512 | Sft2d3                                   | N/A | N/A |
| 10454514 | Lims2 /// Gpr17                          | N/A | N/A |
| 10454525 | lws1                                     | N/A | N/A |
| 10454543 | ---                                      | N/A | N/A |
| 10454546 | Map3k2                                   | N/A | N/A |
| 10454564 | Ercc3                                    | N/A | N/A |
| 10454580 | Bin1                                     | N/A | N/A |
| 10454606 | Wdr36                                    | N/A | N/A |
| 10454632 | Camk4                                    | N/A | N/A |
| 10454647 | Gm10549                                  | N/A | N/A |
| 10454651 | ---                                      | N/A | N/A |
| 10454653 | ---                                      | N/A | N/A |
| 10454655 | Apc                                      | N/A | N/A |
| 10454731 | ---                                      | N/A | N/A |
| 10454733 | Rpl29 /// Gm3550                         | N/A | N/A |
| 10454735 | Fam53c                                   | N/A | N/A |
| 10454741 | Kdm3b                                    | N/A | N/A |
| 10454771 | Reep2                                    | N/A | N/A |
| 10454786 | Ctnna1                                   | N/A | N/A |
| 10454805 | Uba52 /// Gm5239                         | N/A | N/A |
| 10454807 | Snora74a                                 | N/A | N/A |
| 10454809 | Matr3                                    | N/A | N/A |
| 10454828 | Pnet-ps                                  | N/A | N/A |
| 10454831 | Paip2                                    | N/A | N/A |
| 10454836 | 1700066B19Rik                            | N/A | N/A |
| 10454840 | LOC546711                                | N/A | N/A |
| 10454842 | Ube2d2                                   | N/A | N/A |
| 10454851 | Cxxc5                                    | N/A | N/A |
| 10454856 | Psd2                                     | N/A | N/A |
| 10454877 | Pura                                     | N/A | N/A |
| 10454881 | O610010012Rik                            | N/A | N/A |
| 10454912 | Ankhd1                                   | N/A | N/A |
| 10454944 | Ankhd1 /// Eif4ebp3                      | N/A | N/A |
| 10454953 | Tmco6                                    | N/A | N/A |
| 10454966 | lk                                       | N/A | N/A |

|          |                                                                                                                           |     |     |
|----------|---------------------------------------------------------------------------------------------------------------------------|-----|-----|
| 10454984 | Wdr55 /// Dnd1                                                                                                            | N/A | N/A |
| 10455007 | Zmat2                                                                                                                     | N/A | N/A |
| 10455017 | Gm6756                                                                                                                    | N/A | N/A |
| 10455019 | Pcdha4-g                                                                                                                  | N/A | N/A |
| 10455048 | Pcdhb1                                                                                                                    | N/A | N/A |
| 10455050 | Pcdhb2                                                                                                                    | N/A | N/A |
| 10455061 | Pcdhb4                                                                                                                    | N/A | N/A |
| 10455065 | Pcdhb5                                                                                                                    | N/A | N/A |
| 10455069 | Pcdhb6                                                                                                                    | N/A | N/A |
| 10455071 | Pcdhb7                                                                                                                    | N/A | N/A |
| 10455078 | Pcdhb8                                                                                                                    | N/A | N/A |
| 10455080 | Pcdhb9                                                                                                                    | N/A | N/A |
| 10455088 | Pcdhb11                                                                                                                   | N/A | N/A |
| 10455092 | Pcdhb12                                                                                                                   | N/A | N/A |
| 10455094 | Pcdhb13                                                                                                                   | N/A | N/A |
| 10455098 | Pcdhb14                                                                                                                   | N/A | N/A |
| 10455104 | Pcdhb15                                                                                                                   | N/A | N/A |
| 10455108 | Pcdhb16                                                                                                                   | N/A | N/A |
| 10455112 | Pcdhb17                                                                                                                   | N/A | N/A |
| 10455118 | Pcdhb18                                                                                                                   | N/A | N/A |
| 10455123 | Pcdhb19                                                                                                                   | N/A | N/A |
| 10455135 | Pcdhb21                                                                                                                   | N/A | N/A |
| 10455139 | Pcdhb22                                                                                                                   | N/A | N/A |
| 10455146 | 3222401L13Rik                                                                                                             | N/A | N/A |
| 10455148 | Pcdhgc5                                                                                                                   | N/A | N/A |
| 10455199 | Rell2 /// Fchsd1                                                                                                          | N/A | N/A |
| 10455210 | Rpl17 /// Gm10268 /// Rpl17-ps3                                                                                           | N/A | N/A |
| 10455212 | 0610009O20Rik                                                                                                             | N/A | N/A |
| 10455227 | Rnf14                                                                                                                     | N/A | N/A |
| 10455238 | Ndfip1                                                                                                                    | N/A | N/A |
| 10455249 | 9630014M24Rik                                                                                                             | N/A | N/A |
| 10455259 | Arhgap26                                                                                                                  | N/A | N/A |
| 10455292 | 2900055J20Rik                                                                                                             | N/A | N/A |
| 10455294 | Kctd16                                                                                                                    | N/A | N/A |
| 10455297 | Gm4838                                                                                                                    | N/A | N/A |
| 10455310 | ---                                                                                                                       | N/A | N/A |
| 10455312 | Rbm27                                                                                                                     | N/A | N/A |
| 10455338 | Rpl21 /// Gm6813 /// Gm9104 /// Rpl21-ps4 /// Rpl21-ps7 /// Gm16415 /// Rpl21-ps12 /// Rpl21-ps14 /// Rpl21-ps10 /// Gm80 | N/A | N/A |
| 10455346 | Tcerg1                                                                                                                    | N/A | N/A |
| 10455372 | C330007P06Rik                                                                                                             | N/A | N/A |
| 10455472 | Dcp2                                                                                                                      | N/A | N/A |
| 10455483 | Ythdc2                                                                                                                    | N/A | N/A |
| 10455514 | Kcnn2                                                                                                                     | N/A | N/A |
| 10455531 | 1700018A14Rik                                                                                                             | N/A | N/A |
| 10455533 | Eif1a                                                                                                                     | N/A | N/A |
| 10455542 | Ap3s1                                                                                                                     | N/A | N/A |
| 10455578 | Commnd10                                                                                                                  | N/A | N/A |
| 10455588 | Hspe1 /// Hspe1-rs1                                                                                                       | N/A | N/A |
| 10455599 | ---                                                                                                                       | N/A | N/A |
| 10455602 | Dmxl1                                                                                                                     | N/A | N/A |
| 10455647 | Tnfaip8                                                                                                                   | N/A | N/A |
| 10455653 | ---                                                                                                                       | N/A | N/A |
| 10455656 | Hsd17b4                                                                                                                   | N/A | N/A |
| 10455687 | Prr16                                                                                                                     | N/A | N/A |
| 10455691 | Ftmt                                                                                                                      | N/A | N/A |
| 10455695 | Srfbp1                                                                                                                    | N/A | N/A |
| 10455705 | ---                                                                                                                       | N/A | N/A |
| 10455719 | Gykl1                                                                                                                     | N/A | N/A |
| 10455721 | Sncaip                                                                                                                    | N/A | N/A |
| 10455738 | Snx2                                                                                                                      | N/A | N/A |
| 10455752 | Snx24                                                                                                                     | N/A | N/A |
| 10455769 | Csnk1g3                                                                                                                   | N/A | N/A |
| 10455780 | Gapdh                                                                                                                     | N/A | N/A |
| 10455782 | ---                                                                                                                       | N/A | N/A |
| 10455784 | Gramd3                                                                                                                    | N/A | N/A |
| 10455809 | 1700065I17Rik                                                                                                             | N/A | N/A |
| 10455824 | Gm10536                                                                                                                   | N/A | N/A |
| 10455852 | Prrc1                                                                                                                     | N/A | N/A |
| 10455863 | Ctnn3                                                                                                                     | N/A | N/A |
| 10455873 | Slc12a2                                                                                                                   | N/A | N/A |
| 10455912 | Isoc1                                                                                                                     | N/A | N/A |
| 10455942 | A730017C20Rik                                                                                                             | N/A | N/A |
| 10455948 | Chsy3                                                                                                                     | N/A | N/A |
| 10455954 | Gm4951                                                                                                                    | N/A | N/A |
| 10455957 | ---                                                                                                                       | N/A | N/A |
| 10455959 | ---                                                                                                                       | N/A | N/A |
| 10455961 | ligp1                                                                                                                     | N/A | N/A |
| 10455967 | 2610318N02Rik                                                                                                             | N/A | N/A |
| 10455970 | BC023105                                                                                                                  | N/A | N/A |
| 10455974 | Dctn4                                                                                                                     | N/A | N/A |
| 10456001 | Rps14                                                                                                                     | N/A | N/A |
| 10456005 | Cd74                                                                                                                      | N/A | N/A |
| 10456021 | Camk2a                                                                                                                    | N/A | N/A |
| 10456046 | Pdgfrb                                                                                                                    | N/A | N/A |

|          |                                 |     |     |
|----------|---------------------------------|-----|-----|
| 10456120 | Csnk1a1                         | N/A | N/A |
| 10456136 | Ii17b                           | N/A | N/A |
| 10456158 | Gm9949                          | N/A | N/A |
| 10456161 | Htr4                            | N/A | N/A |
| 10456184 | Apccd1                          | N/A | N/A |
| 10456194 | Napg                            | N/A | N/A |
| 10456206 | Wdr7                            | N/A | N/A |
| 10456237 | St8sia3                         | N/A | N/A |
| 10456289 | ---                             | N/A | N/A |
| 10456291 | Mir122a                         | N/A | N/A |
| 10456293 | Alpk2 /// F730048M01Rik         | N/A | N/A |
| 10456296 | Malt1                           | N/A | N/A |
| 10456317 | Zfp532                          | N/A | N/A |
| 10456346 | Sec11c                          | N/A | N/A |
| 10456353 | Grp                             | N/A | N/A |
| 10456361 | Gm9926                          | N/A | N/A |
| 10456363 | Gnal                            | N/A | N/A |
| 10456378 | Chmp1b                          | N/A | N/A |
| 10456383 | Impa2                           | N/A | N/A |
| 10456405 | Simo1                           | N/A | N/A |
| 10456414 | Psmg2                           | N/A | N/A |
| 10456423 | Seh1l                           | N/A | N/A |
| 10456435 | ---                             | N/A | N/A |
| 10456437 | ---                             | N/A | N/A |
| 10456486 | ---                             | N/A | N/A |
| 10456488 | Cep192                          | N/A | N/A |
| 10456490 | Cep192                          | N/A | N/A |
| 10456492 | D18Ertdd653e                    | N/A | N/A |
| 10456501 | Rnmt                            | N/A | N/A |
| 10456519 | ---                             | N/A | N/A |
| 10456522 | Tcf4                            | N/A | N/A |
| 10456556 | Stard6 /// Gm9795               | N/A | N/A |
| 10456579 | Mex3c                           | N/A | N/A |
| 10456585 | ---                             | N/A | N/A |
| 10456587 | Mro                             | N/A | N/A |
| 10456599 | Gm9925                          | N/A | N/A |
| 10456601 | Cxxc1                           | N/A | N/A |
| 10456619 | ---                             | N/A | N/A |
| 10456622 | Mbd1                            | N/A | N/A |
| 10456650 | ---                             | N/A | N/A |
| 10456699 | Acaa2                           | N/A | N/A |
| 10456709 | Rpl17 /// Gm10268 /// Rpl17-ps3 | N/A | N/A |
| 10456717 | Snord58b                        | N/A | N/A |
| 10456719 | ---                             | N/A | N/A |
| 10456721 | ---                             | N/A | N/A |
| 10456723 | BC031181                        | N/A | N/A |
| 10456727 | Dym                             | N/A | N/A |
| 10456745 | Smad7                           | N/A | N/A |
| 10456754 | Gm10532                         | N/A | N/A |
| 10456756 | Zbtb7c                          | N/A | N/A |
| 10456812 | Hdhd2                           | N/A | N/A |
| 10456814 | Pias2                           | N/A | N/A |
| 10456836 | St8sia5                         | N/A | N/A |
| 10456887 | Loxhd1                          | N/A | N/A |
| 10456891 | Atp5a1                          | N/A | N/A |
| 10456904 | Pstpip2                         | N/A | N/A |
| 10456922 | 5430411K18Rik                   | N/A | N/A |
| 10456970 | ---                             | N/A | N/A |
| 10456972 | Gm10265                         | N/A | N/A |
| 10456974 | Arf1                            | N/A | N/A |
| 10456976 | Gm10527 /// Gm10526             | N/A | N/A |
| 10456978 | Gm10527 /// Gm10526             | N/A | N/A |
| 10456980 | Gm10527 /// Gm10526             | N/A | N/A |
| 10456982 | Gm10527 /// Gm10526             | N/A | N/A |
| 10456984 | Gm10527 /// Gm10526             | N/A | N/A |
| 10456986 | Gm10527 /// Gm10526             | N/A | N/A |
| 10457007 | Pqlc1                           | N/A | N/A |
| 10457020 | ---                             | N/A | N/A |
| 10457022 | Mbp                             | N/A | N/A |
| 10457038 | Gm10524                         | N/A | N/A |
| 10457040 | Zfp516                          | N/A | N/A |
| 10457048 | Gm10523                         | N/A | N/A |
| 10457054 | Zadh2                           | N/A | N/A |
| 10457071 | Cyb5                            | N/A | N/A |
| 10457091 | Neto1                           | N/A | N/A |
| 10457106 | Cbln2                           | N/A | N/A |
| 10457114 | Bhmt /// Bhmt2                  | N/A | N/A |
| 10457183 | Tmx3                            | N/A | N/A |
| 10457203 | ---                             | N/A | N/A |
| 10457205 | Crem                            | N/A | N/A |
| 10457221 | ---                             | N/A | N/A |
| 10457223 | 2610005L07Rik /// 6820431F20Rik | N/A | N/A |
| 10457225 | Map3k8                          | N/A | N/A |
| 10457243 | Gm10125                         | N/A | N/A |

|          |                     |     |     |
|----------|---------------------|-----|-----|
| 10457250 | Arhgap12            | N/A | N/A |
| 10457273 | Kif5b               | N/A | N/A |
| 10457302 | Epc1                | N/A | N/A |
| 10457323 | Mkx                 | N/A | N/A |
| 10457331 | Mzt1                | N/A | N/A |
| 10457357 | Mpp7                | N/A | N/A |
| 10457359 | Mpp7                | N/A | N/A |
| 10457378 | Gm9993              | N/A | N/A |
| 10457380 | ---                 | N/A | N/A |
| 10457385 | Ccny                | N/A | N/A |
| 10457400 | ---                 | N/A | N/A |
| 10457407 | ---                 | N/A | N/A |
| 10457409 | Usp14 /// Thoc1     | N/A | N/A |
| 10457429 | Rock1               | N/A | N/A |
| 10457463 | Nutf2 /// Nutf2-ps1 | N/A | N/A |
| 10457475 | Abhd3               | N/A | N/A |
| 10457485 | Mir133a-1           | N/A | N/A |
| 10457487 | Mir1-2              | N/A | N/A |
| 10457489 | 6030446N20Rik       | N/A | N/A |
| 10457508 | Npc1                | N/A | N/A |
| 10457536 | Ankrd29             | N/A | N/A |
| 10457583 | ---                 | N/A | N/A |
| 10457587 | Zfp521              | N/A | N/A |
| 10457598 | Ss18                | N/A | N/A |
| 10457606 | Kctd1               | N/A | N/A |
| 10457637 | ---                 | N/A | N/A |
| 10457640 | S100a11             | N/A | N/A |
| 10457644 | Cdh2                | N/A | N/A |
| 10457663 | ---                 | N/A | N/A |
| 10457665 | 4921533I20Rik       | N/A | N/A |
| 10457667 | LOC280487           | N/A | N/A |
| 10457686 | Dsc2                | N/A | N/A |
| 10457729 | ---                 | N/A | N/A |
| 10457731 | Rpl35 /// Gm10269   | N/A | N/A |
| 10457733 | B4galt6             | N/A | N/A |
| 10457745 | D030074E01Rik       | N/A | N/A |
| 10457776 | ---                 | N/A | N/A |
| 10457778 | Gm10551             | N/A | N/A |
| 10457780 | Fam59a              | N/A | N/A |
| 10457820 | Nol4                | N/A | N/A |
| 10457834 | Nol4                | N/A | N/A |
| 10457836 | Nol4                | N/A | N/A |
| 10457838 | Zscan30             | N/A | N/A |
| 10457844 | Zfp191 /// Zf12     | N/A | N/A |
| 10457853 | Ino80c              | N/A | N/A |
| 10457862 | Rprd1a              | N/A | N/A |
| 10457872 | Slc39a6             | N/A | N/A |
| 10457884 | Gm9955              | N/A | N/A |
| 10457886 | Gm9960              | N/A | N/A |
| 10457888 | 5730494M16Rik       | N/A | N/A |
| 10457895 | Celf4               | N/A | N/A |
| 10457916 | ---                 | N/A | N/A |
| 10457918 | ---                 | N/A | N/A |
| 10457920 | Rps25 /// Gm4963    | N/A | N/A |
| 10457922 | Rpl29               | N/A | N/A |
| 10457924 | Bloc1s1             | N/A | N/A |
| 10457927 | ---                 | N/A | N/A |
| 10457929 | Rit2                | N/A | N/A |
| 10457938 | ---                 | N/A | N/A |
| 10457942 | Syt4                | N/A | N/A |
| 10457948 | Slc25a46            | N/A | N/A |
| 10457959 | Sft2d3              | N/A | N/A |
| 10457963 | Gpr17               | N/A | N/A |
| 10458016 | Proc                | N/A | N/A |
| 10458044 | Osgep               | N/A | N/A |
| 10458046 | D0H45114            | N/A | N/A |
| 10458084 | ---                 | N/A | N/A |
| 10458086 | ---                 | N/A | N/A |
| 10458088 | Gm10548             | N/A | N/A |
| 10458090 | Reep5               | N/A | N/A |
| 10458098 | Fam13b /// Pkd2l2   | N/A | N/A |
| 10458122 | Nme5                | N/A | N/A |
| 10458138 | Brd8                | N/A | N/A |
| 10458164 | Cdc23 /// Kif20a    | N/A | N/A |
| 10458213 | Etf1                | N/A | N/A |
| 10458226 | Hspa9               | N/A | N/A |
| 10458247 | Lrrtm2              | N/A | N/A |
| 10458251 | Sil1                | N/A | N/A |
| 10458262 | Slc23a1             | N/A | N/A |
| 10458283 | Gm1614              | N/A | N/A |
| 10458285 | Spata24             | N/A | N/A |
| 10458293 | Dnajc18             | N/A | N/A |
| 10458323 | Nrg2                | N/A | N/A |
| 10458334 | Pfdn1               | N/A | N/A |

|          |                                 |     |     |
|----------|---------------------------------|-----|-----|
| 10458340 | Hbegf                           | N/A | N/A |
| 10458355 | Apbb3 /// Slc35a4               | N/A | N/A |
| 10458382 | Cd14                            | N/A | N/A |
| 10458386 | Ndufa2                          | N/A | N/A |
| 10458415 | Gm10545                         | N/A | N/A |
| 10458417 | Gm10544                         | N/A | N/A |
| 10458419 | Slc25a2                         | N/A | N/A |
| 10458424 | Taf7                            | N/A | N/A |
| 10458428 | Uxt                             | N/A | N/A |
| 10458461 | Hdac3                           | N/A | N/A |
| 10458534 | Pcdh1                           | N/A | N/A |
| 10458538 | 0610009O20Rik /// 1700086O06Rik | N/A | N/A |
| 10458547 | Gnpda1 /// Gm8615               | N/A | N/A |
| 10458560 | Fgf1                            | N/A | N/A |
| 10458569 | Nr3c1                           | N/A | N/A |
| 10458581 | Gm10008                         | N/A | N/A |
| 10458583 | Yipf5                           | N/A | N/A |
| 10458607 | Lars                            | N/A | N/A |
| 10458645 | Ppp2r2b                         | N/A | N/A |
| 10458661 | ---                             | N/A | N/A |
| 10458663 | Dpysl3                          | N/A | N/A |
| 10458680 | Eif3j                           | N/A | N/A |
| 10458685 | Jakmip2                         | N/A | N/A |
| 10458731 | Mcc                             | N/A | N/A |
| 10458755 | Ythdc2                          | N/A | N/A |
| 10458757 | Morf4l1                         | N/A | N/A |
| 10458760 | ---                             | N/A | N/A |
| 10458762 | ---                             | N/A | N/A |
| 10458764 | ---                             | N/A | N/A |
| 10458782 | Pggt1b                          | N/A | N/A |
| 10458784 | Pggt1b                          | N/A | N/A |
| 10458794 | Ccdc112                         | N/A | N/A |
| 10458804 | ---                             | N/A | N/A |
| 10458823 | Tmed7                           | N/A | N/A |
| 10458828 | Cdo1                            | N/A | N/A |
| 10458834 | Atg12                           | N/A | N/A |
| 10458841 | Ube2l3 /// Gm10145              | N/A | N/A |
| 10458843 | Sema6a                          | N/A | N/A |
| 10458870 | ---                             | N/A | N/A |
| 10458875 | Dtwd2                           | N/A | N/A |
| 10458882 | ---                             | N/A | N/A |
| 10458913 | Cep120                          | N/A | N/A |
| 10458938 | ---                             | N/A | N/A |
| 10458940 | Zfp608                          | N/A | N/A |
| 10458956 | ---                             | N/A | N/A |
| 10458958 | ---                             | N/A | N/A |
| 10458960 | Aldh7a1 /// Phax                | N/A | N/A |
| 10458983 | March3                          | N/A | N/A |
| 10458992 | C330018D20Rik                   | N/A | N/A |
| 10459066 | Gm4841                          | N/A | N/A |
| 10459089 | Ndst1                           | N/A | N/A |
| 10459138 | Slc6a7                          | N/A | N/A |
| 10459158 | Hmgxb3                          | N/A | N/A |
| 10459183 | Slc26a2                         | N/A | N/A |
| 10459208 | Mir378                          | N/A | N/A |
| 10459225 | Mir145                          | N/A | N/A |
| 10459227 | Mir143                          | N/A | N/A |
| 10459229 | Pcyox1l                         | N/A | N/A |
| 10459236 | Grpel2                          | N/A | N/A |
| 10459292 | Gm9876                          | N/A | N/A |
| 10459294 | ---                             | N/A | N/A |
| 10459296 | Fbxo38                          | N/A | N/A |
| 10459375 | Txn1                            | N/A | N/A |
| 10459387 | Nsa2                            | N/A | N/A |
| 10459391 | Fech                            | N/A | N/A |
| 10459405 | Nars                            | N/A | N/A |
| 10459421 | Atp8b1                          | N/A | N/A |
| 10459452 | A330084C13Rik                   | N/A | N/A |
| 10459467 | ---                             | N/A | N/A |
| 10459481 | Lman1                           | N/A | N/A |
| 10459510 | Mir694                          | N/A | N/A |
| 10459512 | Mc4r                            | N/A | N/A |
| 10459518 | Mppe1                           | N/A | N/A |
| 10459552 | Spire1                          | N/A | N/A |
| 10459576 | Cep76                           | N/A | N/A |
| 10459590 | Ptpn2                           | N/A | N/A |
| 10459602 | Ptpn2                           | N/A | N/A |
| 10459604 | 4933403F05Rik                   | N/A | N/A |
| 10459614 | 4930546C10Rik                   | N/A | N/A |
| 10459618 | ---                             | N/A | N/A |
| 10459620 | Rab27b                          | N/A | N/A |
| 10459637 | ---                             | N/A | N/A |
| 10459643 | 4930503L19Rik                   | N/A | N/A |
| 10459655 | Poli                            | N/A | N/A |

|          |                                                                                                    |     |     |
|----------|----------------------------------------------------------------------------------------------------|-----|-----|
| 10459669 | Rpl5                                                                                               | N/A | N/A |
| 10459671 | Dcc                                                                                                | N/A | N/A |
| 10459730 | Me2                                                                                                | N/A | N/A |
| 10459747 | Mapk4                                                                                              | N/A | N/A |
| 10459766 | Scarna17                                                                                           | N/A | N/A |
| 10459770 | ---                                                                                                | N/A | N/A |
| 10459785 | Gm672                                                                                              | N/A | N/A |
| 10459799 | 170003O11Rik                                                                                       | N/A | N/A |
| 10459802 | ---                                                                                                | N/A | N/A |
| 10459804 | Katnal2                                                                                            | N/A | N/A |
| 10459823 | St8sia5 /// Gm7276                                                                                 | N/A | N/A |
| 10459827 | 8030462N17Rik /// Rnf165                                                                           | N/A | N/A |
| 10459835 | ---                                                                                                | N/A | N/A |
| 10459837 | 8030462N17Rik                                                                                      | N/A | N/A |
| 10459844 | Haus1                                                                                              | N/A | N/A |
| 10459866 | Slc14a1                                                                                            | N/A | N/A |
| 10459905 | Setbp1                                                                                             | N/A | N/A |
| 10459912 | Adnp2                                                                                              | N/A | N/A |
| 10459918 | 1110032A13Rik                                                                                      | N/A | N/A |
| 10459925 | Pqlc1                                                                                              | N/A | N/A |
| 10459927 | Kcng2                                                                                              | N/A | N/A |
| 10459962 | Atp9b                                                                                              | N/A | N/A |
| 10460008 | ---                                                                                                | N/A | N/A |
| 10460010 | Galr1                                                                                              | N/A | N/A |
| 10460016 | Rpl21 /// Gm9104 /// Rpl21-ps7 /// Gm16416 /// Rpl21-ps12 /// Rpl21-ps14 /// Rpl21-ps10 /// Gm8054 | N/A | N/A |
| 10460018 | Zfp236                                                                                             | N/A | N/A |
| 10460055 | ---                                                                                                | N/A | N/A |
| 10460057 | Tshz1                                                                                              | N/A | N/A |
| 10460070 | Zfp407                                                                                             | N/A | N/A |
| 10460085 | Cndp2                                                                                              | N/A | N/A |
| 10460097 | Fam69c                                                                                             | N/A | N/A |
| 10460100 | ---                                                                                                | N/A | N/A |
| 10460102 | 1700034H14Rik                                                                                      | N/A | N/A |
| 10460106 | ---                                                                                                | N/A | N/A |
| 10460108 | Gnpnat1                                                                                            | N/A | N/A |
| 10460112 | ---                                                                                                | N/A | N/A |
| 10460114 | ---                                                                                                | N/A | N/A |
| 10460118 | Socs6                                                                                              | N/A | N/A |
| 10460123 | 9330132A10Rik                                                                                      | N/A | N/A |
| 10460127 | Dok6                                                                                               | N/A | N/A |
| 10460146 | ---                                                                                                | N/A | N/A |
| 10460149 | ---                                                                                                | N/A | N/A |
| 10460151 | Mrpl21                                                                                             | N/A | N/A |
| 10460157 | Cpt1a                                                                                              | N/A | N/A |
| 10460194 | ---                                                                                                | N/A | N/A |
| 10460202 | Suv420h1                                                                                           | N/A | N/A |
| 10460237 | Unc93b1                                                                                            | N/A | N/A |
| 10460253 | Aldh3b2                                                                                            | N/A | N/A |
| 10460255 | 1700055N04Rik                                                                                      | N/A | N/A |
| 10460257 | 1700055N04Rik                                                                                      | N/A | N/A |
| 10460259 | Aldh3b2                                                                                            | N/A | N/A |
| 10460312 | Cdk2ap2                                                                                            | N/A | N/A |
| 10460344 | Tmem134                                                                                            | N/A | N/A |
| 10460359 | Coro1b                                                                                             | N/A | N/A |
| 10460376 | Ppp1ca                                                                                             | N/A | N/A |
| 10460392 | Pold4                                                                                              | N/A | N/A |
| 10460400 | Pcx                                                                                                | N/A | N/A |
| 10460423 | Spnb3                                                                                              | N/A | N/A |
| 10460461 | Rbm4b                                                                                              | N/A | N/A |
| 10460466 | Ccdc87                                                                                             | N/A | N/A |
| 10460468 | Ctsf                                                                                               | N/A | N/A |
| 10460485 | Zdhhc24                                                                                            | N/A | N/A |
| 10460490 | Dpp3                                                                                               | N/A | N/A |
| 10460492 | Mrpl11                                                                                             | N/A | N/A |
| 10460498 | Slc29a2                                                                                            | N/A | N/A |
| 10460517 | Brms1                                                                                              | N/A | N/A |
| 10460541 | Cd248                                                                                              | N/A | N/A |
| 10460544 | Yif1a                                                                                              | N/A | N/A |
| 10460554 | Klc2 /// Gm10817                                                                                   | N/A | N/A |
| 10460556 | Gal3st3                                                                                            | N/A | N/A |
| 10460573 | Eif1ad                                                                                             | N/A | N/A |
| 10460580 | Sart1 /// D330050I16Rik                                                                            | N/A | N/A |
| 10460582 | AI837181                                                                                           | N/A | N/A |
| 10460591 | Fibp                                                                                               | N/A | N/A |
| 10460603 | Efemp2                                                                                             | N/A | N/A |
| 10460616 | Cf1                                                                                                | N/A | N/A |
| 10460623 | Gm962                                                                                              | N/A | N/A |
| 10460626 | Rnaseh2c                                                                                           | N/A | N/A |
| 10460645 | Map3k11                                                                                            | N/A | N/A |
| 10460693 | Gm9783 /// Frmd8                                                                                   | N/A | N/A |
| 10460696 | Slc25a45                                                                                           | N/A | N/A |
| 10460704 | Gm10814                                                                                            | N/A | N/A |
| 10460706 | Syvn1                                                                                              | N/A | N/A |
| 10460726 | Fau                                                                                                | N/A | N/A |

|          |                            |     |     |
|----------|----------------------------|-----|-----|
| 10460732 | Znhit2-ps                  | N/A | N/A |
| 10460735 | BC048609 /// 1110014N23Rik | N/A | N/A |
| 10460765 | 2400001E08Rik              | N/A | N/A |
| 10460767 | Batf2                      | N/A | N/A |
| 10460787 | Atg2a                      | N/A | N/A |
| 10460829 | Mir194-2                   | N/A | N/A |
| 10460831 | Mir192                     | N/A | N/A |
| 10460833 | Ehd1                       | N/A | N/A |
| 10460879 | Men1                       | N/A | N/A |
| 10460891 | Map4k2                     | N/A | N/A |
| 10460926 | Sf1                        | N/A | N/A |
| 10460947 | Pygm                       | N/A | N/A |
| 10460987 | Nrxn2                      | N/A | N/A |
| 10461012 | Prdx5 /// Trmt112          | N/A | N/A |
| 10461022 | Ppp1r14b                   | N/A | N/A |
| 10461028 | Trpt1                      | N/A | N/A |
| 10461051 | 5730409K12Rik              | N/A | N/A |
| 10461055 | ---                        | N/A | N/A |
| 10461078 | Atf3                       | N/A | N/A |
| 10461108 | Iscu                       | N/A | N/A |
| 10461115 | Slc22a8                    | N/A | N/A |
| 10461143 | Chrm1                      | N/A | N/A |
| 10461150 | ---                        | N/A | N/A |
| 10461152 | Snhg1                      | N/A | N/A |
| 10461154 | Snhg1                      | N/A | N/A |
| 10461156 | Snhg1                      | N/A | N/A |
| 10461158 | Snhg1                      | N/A | N/A |
| 10461160 | ---                        | N/A | N/A |
| 10461162 | Snord22                    | N/A | N/A |
| 10461164 | Wdr74                      | N/A | N/A |
| 10461176 | Stx5a                      | N/A | N/A |
| 10461191 | Nxf1                       | N/A | N/A |
| 10461214 | Tmem223                    | N/A | N/A |
| 10461220 | Hnrnpul2                   | N/A | N/A |
| 10461237 | Bscl2                      | N/A | N/A |
| 10461274 | Ints5                      | N/A | N/A |
| 10461277 | Ganab                      | N/A | N/A |
| 10461305 | B3gat3                     | N/A | N/A |
| 10461334 | Mta2 /// Gm10353           | N/A | N/A |
| 10461354 | Tut1                       | N/A | N/A |
| 10461365 | Eef1g                      | N/A | N/A |
| 10461389 | Rps7 /// Gm9493            | N/A | N/A |
| 10461391 | Pcna                       | N/A | N/A |
| 10461400 | ---                        | N/A | N/A |
| 10461402 | Fth1                       | N/A | N/A |
| 10461408 | Rab3il1                    | N/A | N/A |
| 10461423 | Fads3                      | N/A | N/A |
| 10461439 | Fads1                      | N/A | N/A |
| 10461452 | Fen1                       | N/A | N/A |
| 10461459 | Syt7                       | N/A | N/A |
| 10461475 | Cpsf7 /// Tmem216          | N/A | N/A |
| 10461487 | Cybasc3                    | N/A | N/A |
| 10461526 | Vwce                       | N/A | N/A |
| 10461547 | Vps37c                     | N/A | N/A |
| 10461568 | Prpf19                     | N/A | N/A |
| 10461583 | Gpr44 /// Ccdc86           | N/A | N/A |
| 10461640 | ---                        | N/A | N/A |
| 10461642 | Scarna17                   | N/A | N/A |
| 10461663 | Mrpl16                     | N/A | N/A |
| 10461671 | Patl1                      | N/A | N/A |
| 10461690 | Osbp                       | N/A | N/A |
| 10461705 | Olfr1431                   | N/A | N/A |
| 10461707 | Olfr235                    | N/A | N/A |
| 10461711 | Olfr1434 /// Olfr1433      | N/A | N/A |
| 10461713 | Olfr1440                   | N/A | N/A |
| 10461715 | Olfr1441                   | N/A | N/A |
| 10461717 | Pfpl                       | N/A | N/A |
| 10461721 | Mpeg1                      | N/A | N/A |
| 10461728 | Gm4952                     | N/A | N/A |
| 10461735 | Glyat                      | N/A | N/A |
| 10461758 | Keg1                       | N/A | N/A |
| 10461765 | Lpxn                       | N/A | N/A |
| 10461780 | Olfr1445                   | N/A | N/A |
| 10461782 | Rmnd1 /// Gm5512           | N/A | N/A |
| 10461784 | Olfr1449                   | N/A | N/A |
| 10461786 | Olfr1450                   | N/A | N/A |
| 10461788 | Olfr1451                   | N/A | N/A |
| 10461794 | Olfr1461                   | N/A | N/A |
| 10461800 | Olfr1466                   | N/A | N/A |
| 10461802 | Olfr1467                   | N/A | N/A |
| 10461804 | Olfr1469                   | N/A | N/A |
| 10461814 | Olfr1480                   | N/A | N/A |
| 10461816 | Olfr1484                   | N/A | N/A |
| 10461822 | Olfr1490                   | N/A | N/A |

|          |                           |     |     |
|----------|---------------------------|-----|-----|
| 10461824 | Olfr1491                  | N/A | N/A |
| 10461830 | Olfr1495                  | N/A | N/A |
| 10461832 | Olfr1496                  | N/A | N/A |
| 10461834 | Olfr1502 /// Olfr1505     | N/A | N/A |
| 10461840 | Olfr1505                  | N/A | N/A |
| 10461842 | ---                       | N/A | N/A |
| 10461844 | Gnaq                      | N/A | N/A |
| 10461867 | Vps13a                    | N/A | N/A |
| 10461898 | Rfk                       | N/A | N/A |
| 10461904 | ---                       | N/A | N/A |
| 10461906 | ---                       | N/A | N/A |
| 10461909 | BC016495                  | N/A | N/A |
| 10461921 | 2410127L17Rik             | N/A | N/A |
| 10461930 | D030056L22Rik             | N/A | N/A |
| 10461979 | Aldh1a1                   | N/A | N/A |
| 10462035 | Ldhd                      | N/A | N/A |
| 10462039 | Trpm3                     | N/A | N/A |
| 10462081 | Nsa2                      | N/A | N/A |
| 10462084 | Mir204                    | N/A | N/A |
| 10462086 | ---                       | N/A | N/A |
| 10462088 | ---                       | N/A | N/A |
| 10462096 | ---                       | N/A | N/A |
| 10462100 | Sarnp                     | N/A | N/A |
| 10462102 | Ptar1                     | N/A | N/A |
| 10462111 | Gm9938                    | N/A | N/A |
| 10462113 | Apba1                     | N/A | N/A |
| 10462130 | Fam122a                   | N/A | N/A |
| 10462136 | Cycs                      | N/A | N/A |
| 10462193 | Ndufb4                    | N/A | N/A |
| 10462195 | Kank1                     | N/A | N/A |
| 10462214 | ---                       | N/A | N/A |
| 10462281 | Vldlr                     | N/A | N/A |
| 10462309 | C030016D13Rik             | N/A | N/A |
| 10462313 | Slc1a1                    | N/A | N/A |
| 10462330 | Ppapdc2 /// 4430402118Rik | N/A | N/A |
| 10462333 | Cdc371                    | N/A | N/A |
| 10462343 | Gm9895                    | N/A | N/A |
| 10462357 | Mir101b                   | N/A | N/A |
| 10462359 | Gm9883                    | N/A | N/A |
| 10462363 | Jak2                      | N/A | N/A |
| 10462390 | Cd274                     | N/A | N/A |
| 10462442 | Il33                      | N/A | N/A |
| 10462454 | Uhrf2                     | N/A | N/A |
| 10462473 | Mbl2                      | N/A | N/A |
| 10462484 | A1cf                      | N/A | N/A |
| 10462499 | ---                       | N/A | N/A |
| 10462501 | 2700046G09Rik             | N/A | N/A |
| 10462504 | Minpp1                    | N/A | N/A |
| 10462507 | Papss2                    | N/A | N/A |
| 10462521 | Pten                      | N/A | N/A |
| 10462535 | Pten                      | N/A | N/A |
| 10462539 | Nudt15                    | N/A | N/A |
| 10462587 | Stambpl1                  | N/A | N/A |
| 10462603 | Fas                       | N/A | N/A |
| 10462618 | Ifit3                     | N/A | N/A |
| 10462621 | I830012O16Rik             | N/A | N/A |
| 10462623 | Ifit1                     | N/A | N/A |
| 10462630 | Pank1                     | N/A | N/A |
| 10462683 | Pcgf5                     | N/A | N/A |
| 10462697 | ---                       | N/A | N/A |
| 10462699 | ---                       | N/A | N/A |
| 10462702 | Hectd2                    | N/A | N/A |
| 10462724 | Tnks2                     | N/A | N/A |
| 10462752 | Btaf1                     | N/A | N/A |
| 10462818 | Hhex                      | N/A | N/A |
| 10462822 | Exoc6                     | N/A | N/A |
| 10462853 | Cyp26a1                   | N/A | N/A |
| 10462861 | ---                       | N/A | N/A |
| 10462879 | ---                       | N/A | N/A |
| 10462912 | Lgi1                      | N/A | N/A |
| 10462918 | Tmem20                    | N/A | N/A |
| 10462957 | Tbc1d12                   | N/A | N/A |
| 10463037 | Cyp2c39                   | N/A | N/A |
| 10463043 | Cyp2c37                   | N/A | N/A |
| 10463051 | Cyp2c50                   | N/A | N/A |
| 10463064 | Gm4609 /// Gm2451         | N/A | N/A |
| 10463066 | Tctn3                     | N/A | N/A |
| 10463068 | Ptp4a1 /// Gm13363        | N/A | N/A |
| 10463070 | Entpd1                    | N/A | N/A |
| 10463112 | Ccnj                      | N/A | N/A |
| 10463121 | Zfp518a                   | N/A | N/A |
| 10463138 | Dppa2 /// Gm9788          | N/A | N/A |
| 10463140 | Lcor                      | N/A | N/A |
| 10463153 | Morf411                   | N/A | N/A |



|          |                                 |     |     |
|----------|---------------------------------|-----|-----|
| 10463155 | Gm340                           | N/A | N/A |
| 10463164 | Frat1                           | N/A | N/A |
| 10463168 | Pgam1                           | N/A | N/A |
| 10463173 | Zdhhc16                         | N/A | N/A |
| 10463185 | Ubttd1                          | N/A | N/A |
| 10463200 | Dhdpsl                          | N/A | N/A |
| 10463209 | 4933411K16Rik                   | N/A | N/A |
| 10463224 | Marveld1                        | N/A | N/A |
| 10463227 | Gm6937                          | N/A | N/A |
| 10463229 | Zfyve27                         | N/A | N/A |
| 10463242 | Golga7b                         | N/A | N/A |
| 10463254 | D19Erttd386e                    | N/A | N/A |
| 10463263 | Lztf11                          | N/A | N/A |
| 10463265 | Cnrm1                           | N/A | N/A |
| 10463282 | Entpd7                          | N/A | N/A |
| 10463308 | Abcc2                           | N/A | N/A |
| 10463343 | Gm10768                         | N/A | N/A |
| 10463345 | 1700084K02Rik                   | N/A | N/A |
| 10463355 | Scd2                            | N/A | N/A |
| 10463380 | Hif1an                          | N/A | N/A |
| 10463402 | ---                             | N/A | N/A |
| 10463404 | Fam178a                         | N/A | N/A |
| 10463410 | Fam178a                         | N/A | N/A |
| 10463428 | ---                             | N/A | N/A |
| 10463430 | Sema4g                          | N/A | N/A |
| 10463448 | Peo1                            | N/A | N/A |
| 10463457 | Lzts2                           | N/A | N/A |
| 10463486 | Btrc                            | N/A | N/A |
| 10463505 | Dpcd                            | N/A | N/A |
| 10463513 | 9130011E15Rik /// 4930505N22Rik | N/A | N/A |
| 10463515 | Hps6                            | N/A | N/A |
| 10463535 | Nolc1                           | N/A | N/A |
| 10463557 | Gbf1                            | N/A | N/A |
| 10463632 | Tmem180                         | N/A | N/A |
| 10463643 | ---                             | N/A | N/A |
| 10463645 | Sufu                            | N/A | N/A |
| 10463661 | Trim8 /// Gm9798                | N/A | N/A |
| 10463687 | D19Vsu162e                      | N/A | N/A |
| 10463695 | 2010012O05Rik                   | N/A | N/A |
| 10463704 | As3mt                           | N/A | N/A |
| 10463716 | Cnrm2                           | N/A | N/A |
| 10463729 | Nt5c2                           | N/A | N/A |
| 10463732 | Ina                             | N/A | N/A |
| 10463737 | Ina                             | N/A | N/A |
| 10463739 | Taf5                            | N/A | N/A |
| 10463799 | ---                             | N/A | N/A |
| 10463803 | Slk                             | N/A | N/A |
| 10463836 | Gsto1                           | N/A | N/A |
| 10463875 | Sorcs3                          | N/A | N/A |
| 10463904 | ---                             | N/A | N/A |
| 10463911 | Add3                            | N/A | N/A |
| 10463930 | Mxi1                            | N/A | N/A |
| 10463951 | Smc3                            | N/A | N/A |
| 10463997 | Pdcd4                           | N/A | N/A |
| 10464013 | ---                             | N/A | N/A |
| 10464015 | Shoc2                           | N/A | N/A |
| 10464030 | Adra2a                          | N/A | N/A |
| 10464045 | Acsf5                           | N/A | N/A |
| 10464070 | Vti1a                           | N/A | N/A |
| 10464084 | Tcf7l2                          | N/A | N/A |
| 10464107 | Ppnr                            | N/A | N/A |
| 10464110 | D730002M21Rik                   | N/A | N/A |
| 10464113 | Habp2                           | N/A | N/A |
| 10464153 | Nhlrc2                          | N/A | N/A |
| 10464167 | Adrb1                           | N/A | N/A |
| 10464169 | A630007B06Rik /// 1700010L13Rik | N/A | N/A |
| 10464218 | Fam160b1                        | N/A | N/A |
| 10464251 | Atrnl1                          | N/A | N/A |
| 10464283 | Gm10007                         | N/A | N/A |
| 10464285 | ---                             | N/A | N/A |
| 10464363 | 4930442E04Rik                   | N/A | N/A |
| 10464370 | Slc18a2                         | N/A | N/A |
| 10464388 | Rps12 /// Gm10063 /// Rps12-ps2 | N/A | N/A |
| 10464407 | 4933412A08Rik /// D19Erttd737e  | N/A | N/A |
| 10464409 | Nanos1                          | N/A | N/A |
| 10464413 | Gm10751                         | N/A | N/A |
| 10464415 | Fam45a                          | N/A | N/A |
| 10464443 | ---                             | N/A | N/A |
| 10464445 | ---                             | N/A | N/A |
| 10464469 | Rpl7a /// Gm16477               | N/A | N/A |
| 10464471 | Gal                             | N/A | N/A |
| 10464479 | Ppp6r3                          | N/A | N/A |
| 10464504 | Lrp5                            | N/A | N/A |
| 10464529 | Tcirg1                          | N/A | N/A |

|          |                                            |     |     |
|----------|--------------------------------------------|-----|-----|
| 10464551 | Ndufs8                                     | N/A | N/A |
| 10464569 | 4833408A19Rik                              | N/A | N/A |
| 10464583 | Gstp1                                      | N/A | N/A |
| 10464586 | Gstp2 /// Gstp1                            | N/A | N/A |
| 10464594 | BC021614                                   | N/A | N/A |
| 10464601 | ---                                        | N/A | N/A |
| 10464603 | Aip                                        | N/A | N/A |
| 10464642 | Carns1                                     | N/A | N/A |
| 10464659 | Rad9                                       | N/A | N/A |
| 10464672 | Ssh3                                       | N/A | N/A |
| 10464688 | Ankrd13d                                   | N/A | N/A |
| 10464704 | Adrbk1                                     | N/A | N/A |
| 10464728 | Kdm2a                                      | N/A | N/A |
| 10464754 | Rhod                                       | N/A | N/A |
| 10464761 | Syt12                                      | N/A | N/A |
| 10464772 | 2010003K11Rik                              | N/A | N/A |
| 10464775 | Lrfn4                                      | N/A | N/A |
| 10464783 | Rce1                                       | N/A | N/A |
| 10464811 | ---                                        | N/A | N/A |
| 10464813 | Rbm4                                       | N/A | N/A |
| 10464819 | Rbm14                                      | N/A | N/A |
| 10464825 | Ccs                                        | N/A | N/A |
| 10464858 | Bbs1                                       | N/A | N/A |
| 10464877 | Dpp3                                       | N/A | N/A |
| 10464896 | Peli3                                      | N/A | N/A |
| 10464914 | Tmem151a                                   | N/A | N/A |
| 10464917 | Cnih2                                      | N/A | N/A |
| 10464924 | Rab1b                                      | N/A | N/A |
| 10464932 | Klc2                                       | N/A | N/A |
| 10464949 | Pacs1                                      | N/A | N/A |
| 10464974 | Sf3b2                                      | N/A | N/A |
| 10464997 | ---                                        | N/A | N/A |
| 10465005 | Banf1                                      | N/A | N/A |
| 10465043 | Gm6293                                     | N/A | N/A |
| 10465054 | Ccdc85b /// Fos1                           | N/A | N/A |
| 10465072 | Mus81                                      | N/A | N/A |
| 10465089 | Snx32                                      | N/A | N/A |
| 10465103 | 1700020D05Rik                              | N/A | N/A |
| 10465114 | Kat5                                       | N/A | N/A |
| 10465150 | Pcnx13                                     | N/A | N/A |
| 10465209 | Mtvr2 /// Sssca1                           | N/A | N/A |
| 10465215 | Sssca1 /// Mtvr2                           | N/A | N/A |
| 10465220 | Sssca1                                     | N/A | N/A |
| 10465224 | Gm10815                                    | N/A | N/A |
| 10465226 | Scyl1                                      | N/A | N/A |
| 10465244 | Malat1                                     | N/A | N/A |
| 10465260 | Tigd3                                      | N/A | N/A |
| 10465263 | Dpf2                                       | N/A | N/A |
| 10465314 | Capn1                                      | N/A | N/A |
| 10465336 | Mrpl49                                     | N/A | N/A |
| 10465342 | Tm7sf2                                     | N/A | N/A |
| 10465354 | 1110014N23Rik                              | N/A | N/A |
| 10465366 | Zfp11                                      | N/A | N/A |
| 10465379 | Snx15                                      | N/A | N/A |
| 10465388 | Arl2                                       | N/A | N/A |
| 10465395 | Ppp2r5b                                    | N/A | N/A |
| 10465424 | Nrxn2                                      | N/A | N/A |
| 10465474 | Prdx5 /// Trmt112                          | N/A | N/A |
| 10465500 | Kcnk4                                      | N/A | N/A |
| 10465508 | Bad /// Gpr137                             | N/A | N/A |
| 10465553 | Fkbp2                                      | N/A | N/A |
| 10465580 | Nudt22                                     | N/A | N/A |
| 10465604 | Stip1                                      | N/A | N/A |
| 10465619 | Flrt1                                      | N/A | N/A |
| 10465625 | Otub1                                      | N/A | N/A |
| 10465633 | Cox8a                                      | N/A | N/A |
| 10465638 | Naa40                                      | N/A | N/A |
| 10465649 | Mark2                                      | N/A | N/A |
| 10465651 | Mark2                                      | N/A | N/A |
| 10465673 | A1846148                                   | N/A | N/A |
| 10465683 | Rab11b                                     | N/A | N/A |
| 10465686 | Rtn3                                       | N/A | N/A |
| 10465740 | ---                                        | N/A | N/A |
| 10465742 | C730048C13Rik /// Gm5631 /// D630002G06Rik | N/A | N/A |
| 10465764 | C730048C13Rik                              | N/A | N/A |
| 10465772 | Slc3a2                                     | N/A | N/A |
| 10465790 | Tmem179b /// Taf1                          | N/A | N/A |
| 10465804 | Polr2g                                     | N/A | N/A |
| 10465812 | Ttc9c                                      | N/A | N/A |
| 10465820 | Gng3                                       | N/A | N/A |
| 10465831 | 5730408K05Rik                              | N/A | N/A |
| 10465833 | Rom1                                       | N/A | N/A |
| 10465838 | Mta2                                       | N/A | N/A |
| 10465853 | Stxbp3a /// Stxbp3b                        | N/A | N/A |

|          |                                    |     |     |
|----------|------------------------------------|-----|-----|
| 10465895 | Fads2                              | N/A | N/A |
| 10465910 | ---                                | N/A | N/A |
| 10465916 | Gm98                               | N/A | N/A |
| 10465943 | Dagla                              | N/A | N/A |
| 10465963 | Lrrc10b                            | N/A | N/A |
| 10465965 | 4930579J09Rik                      | N/A | N/A |
| 10465980 | Sdhaf2                             | N/A | N/A |
| 10465990 | Tmem216 /// Cpsf7                  | N/A | N/A |
| 10466000 | Tmem138                            | N/A | N/A |
| 10466008 | Dak                                | N/A | N/A |
| 10466073 | Gm10802                            | N/A | N/A |
| 10466075 | Tmem132a                           | N/A | N/A |
| 10466087 | Tmem109                            | N/A | N/A |
| 10466104 | Ccdc86 /// Gpr44                   | N/A | N/A |
| 10466120 | Ms4a15                             | N/A | N/A |
| 10466127 | AW112010                           | N/A | N/A |
| 10466248 | Stx3                               | N/A | N/A |
| 10466266 | Olfr1417                           | N/A | N/A |
| 10466268 | Olfr1418                           | N/A | N/A |
| 10466270 | ---                                | N/A | N/A |
| 10466272 | Olfr1419                           | N/A | N/A |
| 10466274 | ---                                | N/A | N/A |
| 10466276 | Olfr1423                           | N/A | N/A |
| 10466280 | Olfr1426 /// Olfr1424 /// Olfr1425 | N/A | N/A |
| 10466286 | Olfr1427                           | N/A | N/A |
| 10466288 | Olfr1428                           | N/A | N/A |
| 10466290 | Olfr76                             | N/A | N/A |
| 10466292 | ---                                | N/A | N/A |
| 10466294 | ---                                | N/A | N/A |
| 10466296 | Olfr262                            | N/A | N/A |
| 10466300 | Olfr1436 /// Olfr1437              | N/A | N/A |
| 10466302 | ---                                | N/A | N/A |
| 10466314 | ---                                | N/A | N/A |
| 10466317 | Zfp91 /// U05342 /// Cntf          | N/A | N/A |
| 10466344 | ---                                | N/A | N/A |
| 10466347 | Olfr1457                           | N/A | N/A |
| 10466351 | Olfr1459                           | N/A | N/A |
| 10466353 | ---                                | N/A | N/A |
| 10466355 | Olfr1465                           | N/A | N/A |
| 10466361 | Olfr1497                           | N/A | N/A |
| 10466366 | Olfr1499                           | N/A | N/A |
| 10466372 | Olfr1504                           | N/A | N/A |
| 10466374 | Tle4                               | N/A | N/A |
| 10466402 | Eif4a1                             | N/A | N/A |
| 10466404 | ---                                | N/A | N/A |
| 10466406 | ---                                | N/A | N/A |
| 10466439 | Pebp1                              | N/A | N/A |
| 10466441 | Vps13a                             | N/A | N/A |
| 10466528 | Rfk                                | N/A | N/A |
| 10466571 | ---                                | N/A | N/A |
| 10466573 | Ostf1                              | N/A | N/A |
| 10466587 | Rorb                               | N/A | N/A |
| 10466604 | ---                                | N/A | N/A |
| 10466620 | ---                                | N/A | N/A |
| 10466622 | C730037M02Rik                      | N/A | N/A |
| 10466624 | Aldh1a7                            | N/A | N/A |
| 10466659 | Gda                                | N/A | N/A |
| 10466676 | 1110059E24Rik                      | N/A | N/A |
| 10466680 | Klf9 /// Gm9971                    | N/A | N/A |
| 10466728 | 1700028P14Rik                      | N/A | N/A |
| 10466735 | Fam189a2                           | N/A | N/A |
| 10466779 | Pip5k1b                            | N/A | N/A |
| 10466798 | ---                                | N/A | N/A |
| 10466818 | Cbwd1                              | N/A | N/A |
| 10466835 | Snora19                            | N/A | N/A |
| 10466837 | ---                                | N/A | N/A |
| 10466839 | ---                                | N/A | N/A |
| 10466843 | Gapdh /// Gm10293                  | N/A | N/A |
| 10466846 | ---                                | N/A | N/A |
| 10466848 | D19Bwg1357e                        | N/A | N/A |
| 10466865 | Rfx3                               | N/A | N/A |
| 10466886 | Glis3                              | N/A | N/A |
| 10466888 | Glis3                              | N/A | N/A |
| 10466920 | Slc1a1                             | N/A | N/A |
| 10466923 | Rpl26 /// Gm10136 /// Gm15772      | N/A | N/A |
| 10466925 | Ak3                                | N/A | N/A |
| 10466935 | Rln1                               | N/A | N/A |
| 10466947 | Ermp1                              | N/A | N/A |
| 10466970 | 9930021J03Rik                      | N/A | N/A |
| 10466972 | Ranbp6                             | N/A | N/A |
| 10466976 | Gldc                               | N/A | N/A |
| 10467001 | ---                                | N/A | N/A |
| 10467003 | PPP1r2 /// Gm5972                  | N/A | N/A |
| 10467013 | Prkg1                              | N/A | N/A |

|          |                                             |     |     |
|----------|---------------------------------------------|-----|-----|
| 10467038 | Gm6642                                      | N/A | N/A |
| 10467041 | Asah2                                       | N/A | N/A |
| 10467068 | Sgms1                                       | N/A | N/A |
| 10467088 | Rpl9 /// Gm5451                             | N/A | N/A |
| 10467102 | Rnls                                        | N/A | N/A |
| 10467110 | Lipo1                                       | N/A | N/A |
| 10467134 | ---                                         | N/A | N/A |
| 10467139 | Lipa                                        | N/A | N/A |
| 10467153 | Slc16a12                                    | N/A | N/A |
| 10467162 | Pank1                                       | N/A | N/A |
| 10467173 | Mir107                                      | N/A | N/A |
| 10467175 | A830019P07Rik                               | N/A | N/A |
| 10467203 | Pcgf5                                       | N/A | N/A |
| 10467216 | Cpeb3                                       | N/A | N/A |
| 10467230 | Ide                                         | N/A | N/A |
| 10467256 | Rpl10                                       | N/A | N/A |
| 10467319 | Rbp4                                        | N/A | N/A |
| 10467342 | Gm9886                                      | N/A | N/A |
| 10467344 | Noc3l                                       | N/A | N/A |
| 10467368 | Ctdspl2                                     | N/A | N/A |
| 10467372 | Cyp2c38                                     | N/A | N/A |
| 10467380 | Cyp2c67                                     | N/A | N/A |
| 10467385 | Cyp2c68                                     | N/A | N/A |
| 10467390 | Cyp2c40 /// Cyp2c67 /// Cyp2c68 /// Cyp2c69 | N/A | N/A |
| 10467400 | Cyp2c54                                     | N/A | N/A |
| 10467410 | Cyp2c70                                     | N/A | N/A |
| 10467420 | Pllim1                                      | N/A | N/A |
| 10467468 | 3010085J16Rik                               | N/A | N/A |
| 10467470 | Aldh18a1                                    | N/A | N/A |
| 10467489 | Ptp4a1 /// Gm13363                          | N/A | N/A |
| 10467493 | Tctn3                                       | N/A | N/A |
| 10467529 | Opalin                                      | N/A | N/A |
| 10467560 | Tm9sf3                                      | N/A | N/A |
| 10467578 | Pik3ap1                                     | N/A | N/A |
| 10467599 | Slit1                                       | N/A | N/A |
| 10467650 | Frat2                                       | N/A | N/A |
| 10467697 | Mms19                                       | N/A | N/A |
| 10467730 | Morn4                                       | N/A | N/A |
| 10467739 | Avp1                                        | N/A | N/A |
| 10467744 | Sfrp5                                       | N/A | N/A |
| 10467838 | ---                                         | N/A | N/A |
| 10467840 | C130021O09Rik                               | N/A | N/A |
| 10467842 | Got1                                        | N/A | N/A |
| 10467852 | Slc25a28                                    | N/A | N/A |
| 10467859 | Cox15                                       | N/A | N/A |
| 10467871 | Dnmbp                                       | N/A | N/A |
| 10467887 | Cpn1                                        | N/A | N/A |
| 10467897 | Cyp2c44                                     | N/A | N/A |
| 10467907 | Erlin1                                      | N/A | N/A |
| 10467921 | Chuk                                        | N/A | N/A |
| 10467941 | Cwf191                                      | N/A | N/A |
| 10467956 | Bloc1s2                                     | N/A | N/A |
| 10467979 | Scd1                                        | N/A | N/A |
| 10468016 | Ndufb8                                      | N/A | N/A |
| 10468022 | Mrpl43 /// Sema4g                           | N/A | N/A |
| 10468030 | Pdzd7                                       | N/A | N/A |
| 10468037 | Pdzd7                                       | N/A | N/A |
| 10468046 | Lbx1                                        | N/A | N/A |
| 10468059 | Fbxw4                                       | N/A | N/A |
| 10468081 | Npm3 /// Npm3-ps1                           | N/A | N/A |
| 10468089 | Mgea5 /// E330018D03Rik                     | N/A | N/A |
| 10468131 | 9130011E15Rik                               | N/A | N/A |
| 10468159 | Ldb1                                        | N/A | N/A |
| 10468180 | Psd                                         | N/A | N/A |
| 10468200 | Cuedc2 /// Fbx15                            | N/A | N/A |
| 10468213 | 2310034G01Rik                               | N/A | N/A |
| 10468217 | Actr1a                                      | N/A | N/A |
| 10468229 | Trim8 /// Gm9798                            | N/A | N/A |
| 10468231 | Arl3                                        | N/A | N/A |
| 10468239 | Cyp17a1                                     | N/A | N/A |
| 10468249 | Cnm2 /// Gm10199                            | N/A | N/A |
| 10468251 | ---                                         | N/A | N/A |
| 10468253 | Nt5c2                                       | N/A | N/A |
| 10468275 | Pcgf6                                       | N/A | N/A |
| 10468287 | Usmg5                                       | N/A | N/A |
| 10468292 | Pdcd11                                      | N/A | N/A |
| 10468307 | ---                                         | N/A | N/A |
| 10468311 | Sh3pxd2a                                    | N/A | N/A |
| 10468329 | Obfc1                                       | N/A | N/A |
| 10468413 | D19Erttd652e                                | N/A | N/A |
| 10468415 | D19Erttd652e                                | N/A | N/A |
| 10468417 | D19Erttd652e                                | N/A | N/A |
| 10468419 | D19Erttd652e                                | N/A | N/A |
| 10468448 | ---                                         | N/A | N/A |

|          |                              |     |     |
|----------|------------------------------|-----|-----|
| 10468450 | Rpl13a-ps1                   | N/A | N/A |
| 10468452 | Sorcs1                       | N/A | N/A |
| 10468485 | ---                          | N/A | N/A |
| 10468487 | LOC280487                    | N/A | N/A |
| 10468489 | Xpnp1                        | N/A | N/A |
| 10468517 | Mxi1                         | N/A | N/A |
| 10468525 | 5830416P10Rik                | N/A | N/A |
| 10468527 | 5830416P10Rik                | N/A | N/A |
| 10468531 | Nutf2 /// Nutf2-ps1          | N/A | N/A |
| 10468533 | Gpam                         | N/A | N/A |
| 10468560 | Gm10755                      | N/A | N/A |
| 10468584 | Zdhc6                        | N/A | N/A |
| 10468639 | Dclre1a                      | N/A | N/A |
| 10468651 | ---                          | N/A | N/A |
| 10468653 | A630007B06Rik                | N/A | N/A |
| 10468668 | Afap12                       | N/A | N/A |
| 10468691 | Abli1                        | N/A | N/A |
| 10468722 | Gfra1                        | N/A | N/A |
| 10468746 | Hspa12a                      | N/A | N/A |
| 10468762 | 4930506M07Rik                | N/A | N/A |
| 10468783 | Vax1                         | N/A | N/A |
| 10468789 | Pdzd8                        | N/A | N/A |
| 10468795 | Rab11fip2                    | N/A | N/A |
| 10468802 | D19Ert737e                   | N/A | N/A |
| 10468810 | Prhr                         | N/A | N/A |
| 10468816 | 2700078E11Rik                | N/A | N/A |
| 10468828 | Eif3a                        | N/A | N/A |
| 10468851 | Snora19                      | N/A | N/A |
| 10468853 | Sfxn4                        | N/A | N/A |
| 10468869 | Prdx3                        | N/A | N/A |
| 10468877 | ---                          | N/A | N/A |
| 10468881 | Zfp826                       | N/A | N/A |
| 10468885 | Zfp826 /// BC029127          | N/A | N/A |
| 10468891 | Gm7102                       | N/A | N/A |
| 10468893 | Csf2ra                       | N/A | N/A |
| 10468909 | Disp1                        | N/A | N/A |
| 10468929 | Nmt2                         | N/A | N/A |
| 10468974 | Cdnf                         | N/A | N/A |
| 10468988 | ---                          | N/A | N/A |
| 10468990 | Parl                         | N/A | N/A |
| 10468992 | Frm4a                        | N/A | N/A |
| 10469018 | Gm10862                      | N/A | N/A |
| 10469035 | Sephs1                       | N/A | N/A |
| 10469046 | Phyh                         | N/A | N/A |
| 10469056 | Gm13194                      | N/A | N/A |
| 10469058 | Ucma                         | N/A | N/A |
| 10469066 | Ccdc3                        | N/A | N/A |
| 10469070 | Nudt5 /// Cdc123 /// Gm13199 | N/A | N/A |
| 10469081 | Gm10859                      | N/A | N/A |
| 10469083 | Upf2                         | N/A | N/A |
| 10469108 | Gm10857                      | N/A | N/A |
| 10469110 | Usp6nl                       | N/A | N/A |
| 10469127 | LOC280487                    | N/A | N/A |
| 10469138 | 4930412O13Rik                | N/A | N/A |
| 10469140 | ---                          | N/A | N/A |
| 10469143 | Taf3                         | N/A | N/A |
| 10469145 | Kin                          | N/A | N/A |
| 10469151 | Itih5                        | N/A | N/A |
| 10469167 | Sfmbt2                       | N/A | N/A |
| 10469195 | Mir669b                      | N/A | N/A |
| 10469199 | Mir467b /// Mir467d          | N/A | N/A |
| 10469203 | Mir467b                      | N/A | N/A |
| 10469207 | Mir467b                      | N/A | N/A |
| 10469213 | Mir467b                      | N/A | N/A |
| 10469217 | Mir467b                      | N/A | N/A |
| 10469221 | Mir467b /// Mir467d          | N/A | N/A |
| 10469225 | Mir467b                      | N/A | N/A |
| 10469227 | Mir467b                      | N/A | N/A |
| 10469231 | Mir467b                      | N/A | N/A |
| 10469237 | Mir466                       | N/A | N/A |
| 10469239 | Mir669c                      | N/A | N/A |
| 10469243 | Mir297b                      | N/A | N/A |
| 10469247 | Gm10852                      | N/A | N/A |
| 10469276 | Gm10851                      | N/A | N/A |
| 10469289 | Il15ra                       | N/A | N/A |
| 10469300 | Ankrd16                      | N/A | N/A |
| 10469320 | Gm9875                       | N/A | N/A |
| 10469322 | Vim                          | N/A | N/A |
| 10469335 | Stam                         | N/A | N/A |
| 10469389 | Slc39a12                     | N/A | N/A |
| 10469404 | Cacnb2                       | N/A | N/A |
| 10469425 | Arl5b                        | N/A | N/A |
| 10469457 | Plxdc2                       | N/A | N/A |
| 10469503 | ---                          | N/A | N/A |

|          |                                                                                                                        |     |     |
|----------|------------------------------------------------------------------------------------------------------------------------|-----|-----|
| 10469505 | Commd3                                                                                                                 | N/A | N/A |
| 10469514 | Bmi1                                                                                                                   | N/A | N/A |
| 10469536 | ---                                                                                                                    | N/A | N/A |
| 10469538 | 4930426L09Rik                                                                                                          | N/A | N/A |
| 10469559 | Msrb2                                                                                                                  | N/A | N/A |
| 10469571 | Otud1                                                                                                                  | N/A | N/A |
| 10469575 | Ptp4a1 /// Gm13363                                                                                                     | N/A | N/A |
| 10469577 | Gm16495                                                                                                                | N/A | N/A |
| 10469579 | ---                                                                                                                    | N/A | N/A |
| 10469611 | C130046B21Rik                                                                                                          | N/A | N/A |
| 10469613 | Thns1                                                                                                                  | N/A | N/A |
| 10469622 | Gpr158                                                                                                                 | N/A | N/A |
| 10469635 | Gm10846                                                                                                                | N/A | N/A |
| 10469672 | Gad2                                                                                                                   | N/A | N/A |
| 10469693 | ---                                                                                                                    | N/A | N/A |
| 10469720 | Acbd5                                                                                                                  | N/A | N/A |
| 10469732 | Yme1l1                                                                                                                 | N/A | N/A |
| 10469772 | Ube2d3                                                                                                                 | N/A | N/A |
| 10469849 | Zmynd19                                                                                                                | N/A | N/A |
| 10469856 | Wdr85 /// Mrpl41                                                                                                       | N/A | N/A |
| 10469904 | Gm6813 /// Gm9104 /// Rpl21-ps4 /// Rpl21-ps7 /// Gm16415 /// Gm16416 /// Rpl21-ps12 /// Rpl21-ps14 /// Rpl21-ps10 /// | N/A | N/A |
| 10469906 | Nelf                                                                                                                   | N/A | N/A |
| 10469923 | Entpd8                                                                                                                 | N/A | N/A |
| 10469941 | ---                                                                                                                    | N/A | N/A |
| 10469951 | Rnf208                                                                                                                 | N/A | N/A |
| 10469957 | Tprn                                                                                                                   | N/A | N/A |
| 10469965 | Anapc2                                                                                                                 | N/A | N/A |
| 10469979 | Tmem210                                                                                                                | N/A | N/A |
| 10469984 | Lrrc26                                                                                                                 | N/A | N/A |
| 10469987 | Man1b1                                                                                                                 | N/A | N/A |
| 10470027 | Npdc1                                                                                                                  | N/A | N/A |
| 10470050 | Abca2                                                                                                                  | N/A | N/A |
| 10470109 | Fbxw5                                                                                                                  | N/A | N/A |
| 10470119 | Edf1                                                                                                                   | N/A | N/A |
| 10470182 | Bmyc                                                                                                                   | N/A | N/A |
| 10470214 | Kcnt1                                                                                                                  | N/A | N/A |
| 10470248 | Gpsm1                                                                                                                  | N/A | N/A |
| 10470268 | Pmpca                                                                                                                  | N/A | N/A |
| 10470283 | Egfl7                                                                                                                  | N/A | N/A |
| 10470298 | Fam69b                                                                                                                 | N/A | N/A |
| 10470305 | Rpl7a                                                                                                                  | N/A | N/A |
| 10470314 | ---                                                                                                                    | N/A | N/A |
| 10470316 | ---                                                                                                                    | N/A | N/A |
| 10470318 | ---                                                                                                                    | N/A | N/A |
| 10470320 | ---                                                                                                                    | N/A | N/A |
| 10470322 | Surf2                                                                                                                  | N/A | N/A |
| 10470381 | 5930434B04Rik                                                                                                          | N/A | N/A |
| 10470388 | 5930434B04Rik                                                                                                          | N/A | N/A |
| 10470390 | ---                                                                                                                    | N/A | N/A |
| 10470427 | Wdr5                                                                                                                   | N/A | N/A |
| 10470444 | ---                                                                                                                    | N/A | N/A |
| 10470446 | Rxra                                                                                                                   | N/A | N/A |
| 10470529 | Olfm1                                                                                                                  | N/A | N/A |
| 10470543 | Gm347                                                                                                                  | N/A | N/A |
| 10470555 | Gbgt1                                                                                                                  | N/A | N/A |
| 10470562 | Gm10134                                                                                                                | N/A | N/A |
| 10470564 | Ralgds                                                                                                                 | N/A | N/A |
| 10470584 | Tsc1                                                                                                                   | N/A | N/A |
| 10470647 | ---                                                                                                                    | N/A | N/A |
| 10470665 | Setx                                                                                                                   | N/A | N/A |
| 10470696 | Med27                                                                                                                  | N/A | N/A |
| 10470741 | Coq4 /// Trub2                                                                                                         | N/A | N/A |
| 10470751 | Slc27a4                                                                                                                | N/A | N/A |
| 10470768 | Urm1                                                                                                                   | N/A | N/A |
| 10470775 | Cercam                                                                                                                 | N/A | N/A |
| 10470788 | Odf2                                                                                                                   | N/A | N/A |
| 10470816 | Gle1                                                                                                                   | N/A | N/A |
| 10470834 | Spna2                                                                                                                  | N/A | N/A |
| 10470893 | BC085271 /// Set                                                                                                       | N/A | N/A |
| 10470905 | Set                                                                                                                    | N/A | N/A |
| 10470907 | Set                                                                                                                    | N/A | N/A |
| 10470909 | ---                                                                                                                    | N/A | N/A |
| 10470911 | ---                                                                                                                    | N/A | N/A |
| 10470936 | Tbc1d13                                                                                                                | N/A | N/A |
| 10470948 | Slc39a1                                                                                                                | N/A | N/A |
| 10470950 | Endog                                                                                                                  | N/A | N/A |
| 10470954 | Lrrc8a                                                                                                                 | N/A | N/A |
| 10470959 | Phyhd1                                                                                                                 | N/A | N/A |
| 10471018 | Fam73b                                                                                                                 | N/A | N/A |
| 10471036 | Dolpp1                                                                                                                 | N/A | N/A |
| 10471045 | Ppp2r4                                                                                                                 | N/A | N/A |
| 10471058 | Cstad                                                                                                                  | N/A | N/A |
| 10471062 | Mettl11a                                                                                                               | N/A | N/A |
| 10471080 | Usp20                                                                                                                  | N/A | N/A |

|          |                                |     |     |
|----------|--------------------------------|-----|-----|
| 10471108 | Gpr107                         | N/A | N/A |
| 10471129 | Ncs1                           | N/A | N/A |
| 10471154 | Ass1 /// Gm5424                | N/A | N/A |
| 10471171 | Fubp3                          | N/A | N/A |
| 10471191 | Exosc2                         | N/A | N/A |
| 10471201 | Abl1                           | N/A | N/A |
| 10471247 | Aif1l                          | N/A | N/A |
| 10471256 | Nup214                         | N/A | N/A |
| 10471294 | Ppapdc3                        | N/A | N/A |
| 10471298 | Bat2l                          | N/A | N/A |
| 10471333 | ---                            | N/A | N/A |
| 10471335 | ---                            | N/A | N/A |
| 10471337 | Pomt1                          | N/A | N/A |
| 10471358 | Rpl36 /// Gm13611 /// Gm5745   | N/A | N/A |
| 10471385 | Mir199b                        | N/A | N/A |
| 10471387 | Ciz1                           | N/A | N/A |
| 10471411 | Ptges2                         | N/A | N/A |
| 10471419 | Naif1                          | N/A | N/A |
| 10471438 | Dpm2                           | N/A | N/A |
| 10471474 | Ak1                            | N/A | N/A |
| 10471486 | Eng                            | N/A | N/A |
| 10471503 | Taf1d                          | N/A | N/A |
| 10471519 | Tor2a                          | N/A | N/A |
| 10471533 | ---                            | N/A | N/A |
| 10471535 | Fam129b                        | N/A | N/A |
| 10471555 | Angptl2                        | N/A | N/A |
| 10471567 | C130021I20Rik /// LOC100504399 | N/A | N/A |
| 10471569 | ---                            | N/A | N/A |
| 10471571 | Mapkap1                        | N/A | N/A |
| 10471586 | Hspa5                          | N/A | N/A |
| 10471597 | Gm6422                         | N/A | N/A |
| 10471655 | Gsn                            | N/A | N/A |
| 10471675 | Glo1                           | N/A | N/A |
| 10471677 | Dab2ip                         | N/A | N/A |
| 10471701 | Gm10829                        | N/A | N/A |
| 10471715 | Mrrf                           | N/A | N/A |
| 10471739 | Olfr338                        | N/A | N/A |
| 10471743 | Olfr340                        | N/A | N/A |
| 10471745 | Olfr342                        | N/A | N/A |
| 10471747 | Olfr344                        | N/A | N/A |
| 10471753 | Olfr347                        | N/A | N/A |
| 10471759 | Olfr350                        | N/A | N/A |
| 10471761 | Olfr352                        | N/A | N/A |
| 10471763 | Olfr354                        | N/A | N/A |
| 10471766 | ---                            | N/A | N/A |
| 10471768 | Olfr356                        | N/A | N/A |
| 10471770 | Olfr357                        | N/A | N/A |
| 10471772 | Olfr360                        | N/A | N/A |
| 10471774 | Olfr365                        | N/A | N/A |
| 10471778 | Olfr366                        | N/A | N/A |
| 10471780 | Olfr367-ps                     | N/A | N/A |
| 10471782 | Olfr368                        | N/A | N/A |
| 10471784 | Rabgap1                        | N/A | N/A |
| 10471814 | Gpr21                          | N/A | N/A |
| 10471842 | ---                            | N/A | N/A |
| 10471844 | Nek6                           | N/A | N/A |
| 10471878 | Mir181a-2                      | N/A | N/A |
| 10471880 | Mir181b-2                      | N/A | N/A |
| 10471904 | Arpc5l                         | N/A | N/A |
| 10471909 | ---                            | N/A | N/A |
| 10471945 | Zeb2                           | N/A | N/A |
| 10471949 | ---                            | N/A | N/A |
| 10471951 | ---                            | N/A | N/A |
| 10471953 | Acvr2a                         | N/A | N/A |
| 10471967 | Mbd5                           | N/A | N/A |
| 10471978 | Epc2                           | N/A | N/A |
| 10471994 | Kif5c                          | N/A | N/A |
| 10472034 | Lypd6                          | N/A | N/A |
| 10472040 | Gm13498                        | N/A | N/A |
| 10472042 | ---                            | N/A | N/A |
| 10472044 | ---                            | N/A | N/A |
| 10472050 | Tnfaip6                        | N/A | N/A |
| 10472058 | Rif1                           | N/A | N/A |
| 10472095 | Bloc1s2                        | N/A | N/A |
| 10472097 | Fmnl2                          | N/A | N/A |
| 10472128 | Arl6ip6                        | N/A | N/A |
| 10472134 | ---                            | N/A | N/A |
| 10472153 | ---                            | N/A | N/A |
| 10472155 | Kcnj3                          | N/A | N/A |
| 10472162 | Gpd2                           | N/A | N/A |
| 10472195 | Nudt15                         | N/A | N/A |
| 10472197 | ---                            | N/A | N/A |
| 10472212 | Pkp4                           | N/A | N/A |
| 10472275 | ---                            | N/A | N/A |

|          |                                                                                                              |     |     |
|----------|--------------------------------------------------------------------------------------------------------------|-----|-----|
| 10472277 | March7                                                                                                       | N/A | N/A |
| 10472289 | Tank                                                                                                         | N/A | N/A |
| 10472300 | Psmc14                                                                                                       | N/A | N/A |
| 10472321 | Slc4a10                                                                                                      | N/A | N/A |
| 10472350 | Gca                                                                                                          | N/A | N/A |
| 10472364 | Scn2a1                                                                                                       | N/A | N/A |
| 10472366 | Scn2a1                                                                                                       | N/A | N/A |
| 10472368 | Scn2a1                                                                                                       | N/A | N/A |
| 10472370 | Scn2a1                                                                                                       | N/A | N/A |
| 10472372 | Scn9a /// Scn2a1                                                                                             | N/A | N/A |
| 10472374 | Scn9a /// Scn3a /// Scn2a1                                                                                   | N/A | N/A |
| 10472376 | Scn2a1                                                                                                       | N/A | N/A |
| 10472378 | Scn2a1                                                                                                       | N/A | N/A |
| 10472380 | Scn2a1                                                                                                       | N/A | N/A |
| 10472382 | Scn2a1                                                                                                       | N/A | N/A |
| 10472384 | Scn2a1                                                                                                       | N/A | N/A |
| 10472386 | Scn2a1                                                                                                       | N/A | N/A |
| 10472396 | Scn2a1                                                                                                       | N/A | N/A |
| 10472398 | Scn2a1                                                                                                       | N/A | N/A |
| 10472400 | Scn2a1                                                                                                       | N/A | N/A |
| 10472402 | Scn2a1                                                                                                       | N/A | N/A |
| 10472408 | Csrnp3                                                                                                       | N/A | N/A |
| 10472418 | Scn9a                                                                                                        | N/A | N/A |
| 10472436 | B3galt1                                                                                                      | N/A | N/A |
| 10472440 | Tax1bp3                                                                                                      | N/A | N/A |
| 10472467 | ---                                                                                                          | N/A | N/A |
| 10472499 | ---                                                                                                          | N/A | N/A |
| 10472501 | Lass6                                                                                                        | N/A | N/A |
| 10472514 | Nostrin                                                                                                      | N/A | N/A |
| 10472549 | Bbs5                                                                                                         | N/A | N/A |
| 10472570 | Ppig                                                                                                         | N/A | N/A |
| 10472605 | Ssb                                                                                                          | N/A | N/A |
| 10472621 | Ubr3                                                                                                         | N/A | N/A |
| 10472630 | Ubr3                                                                                                         | N/A | N/A |
| 10472686 | Rpl9 /// Gm5451                                                                                              | N/A | N/A |
| 10472707 | Gad1                                                                                                         | N/A | N/A |
| 10472724 | Gorasp2                                                                                                      | N/A | N/A |
| 10472757 | Cybrd1                                                                                                       | N/A | N/A |
| 10472764 | Dync1i2                                                                                                      | N/A | N/A |
| 10472782 | Hat1                                                                                                         | N/A | N/A |
| 10472846 | Pdk1                                                                                                         | N/A | N/A |
| 10472860 | Rapgef4                                                                                                      | N/A | N/A |
| 10472923 | Ak4                                                                                                          | N/A | N/A |
| 10472925 | ---                                                                                                          | N/A | N/A |
| 10472930 | Sp9                                                                                                          | N/A | N/A |
| 10472933 | Scrn3                                                                                                        | N/A | N/A |
| 10472942 | Gm10822                                                                                                      | N/A | N/A |
| 10472944 | ---                                                                                                          | N/A | N/A |
| 10472946 | Hoxd13                                                                                                       | N/A | N/A |
| 10472958 | Hoxd10                                                                                                       | N/A | N/A |
| 10472994 | Mtx2                                                                                                         | N/A | N/A |
| 10473006 | Rpl21 /// Gm6813 /// Gm9104 /// Rpl21-ps4 /// Rpl21-ps7 /// Gm16416 /// Rpl21-ps12 /// Rpl21-ps10 /// Gm8054 | N/A | N/A |
| 10473008 | Hnrnpa3                                                                                                      | N/A | N/A |
| 10473022 | Plp2                                                                                                         | N/A | N/A |
| 10473024 | Agps                                                                                                         | N/A | N/A |
| 10473058 | Osbp16                                                                                                       | N/A | N/A |
| 10473097 | Plekha3                                                                                                      | N/A | N/A |
| 10473107 | ---                                                                                                          | N/A | N/A |
| 10473118 | Ube2e3                                                                                                       | N/A | N/A |
| 10473158 | ---                                                                                                          | N/A | N/A |
| 10473160 | Ssfa2                                                                                                        | N/A | N/A |
| 10473190 | Dnajc10                                                                                                      | N/A | N/A |
| 10473217 | ---                                                                                                          | N/A | N/A |
| 10473219 | ---                                                                                                          | N/A | N/A |
| 10473224 | Dusp19                                                                                                       | N/A | N/A |
| 10473230 | Nup35                                                                                                        | N/A | N/A |
| 10473240 | Eno1 /// Gm5506                                                                                              | N/A | N/A |
| 10473244 | Zfp804a                                                                                                      | N/A | N/A |
| 10473250 | Mrpl18                                                                                                       | N/A | N/A |
| 10473256 | Fsip2                                                                                                        | N/A | N/A |
| 10473270 | ---                                                                                                          | N/A | N/A |
| 10473272 | Zc3h15                                                                                                       | N/A | N/A |
| 10473281 | Itgav                                                                                                        | N/A | N/A |
| 10473312 | Fam171b                                                                                                      | N/A | N/A |
| 10473322 | Cwc22                                                                                                        | N/A | N/A |
| 10473325 | Cwc22                                                                                                        | N/A | N/A |
| 10473328 | Cwc22                                                                                                        | N/A | N/A |
| 10473331 | Cwc22                                                                                                        | N/A | N/A |
| 10473334 | Cwc22                                                                                                        | N/A | N/A |
| 10473337 | Cwc22                                                                                                        | N/A | N/A |
| 10473340 | Cwc22                                                                                                        | N/A | N/A |
| 10473343 | Med19 /// Zdhhc5                                                                                             | N/A | N/A |
| 10473349 | Ypel4                                                                                                        | N/A | N/A |
| 10473356 | Ube2l6                                                                                                       | N/A | N/A |



|          |                                    |     |     |
|----------|------------------------------------|-----|-----|
| 10473363 | Timm10                             | N/A | N/A |
| 10473384 | Slc43a3                            | N/A | N/A |
| 10473414 | Ssrp1                              | N/A | N/A |
| 10473444 | Aplnr                              | N/A | N/A |
| 10473446 | Olfr996                            | N/A | N/A |
| 10473450 | Olfr998                            | N/A | N/A |
| 10473452 | ---                                | N/A | N/A |
| 10473454 | Olfr1008                           | N/A | N/A |
| 10473456 | Olfr1009                           | N/A | N/A |
| 10473458 | Olfr1010                           | N/A | N/A |
| 10473462 | Olfr1014                           | N/A | N/A |
| 10473464 | Olfr1015                           | N/A | N/A |
| 10473469 | Olfr1020                           | N/A | N/A |
| 10473471 | ---                                | N/A | N/A |
| 10473473 | Olfr1022                           | N/A | N/A |
| 10473479 | Olfr1026                           | N/A | N/A |
| 10473481 | Olfr1028                           | N/A | N/A |
| 10473483 | Olfr1029                           | N/A | N/A |
| 10473485 | Olfr1030                           | N/A | N/A |
| 10473489 | Olfr1032                           | N/A | N/A |
| 10473491 | Olfr1033                           | N/A | N/A |
| 10473494 | Olfr1036 /// Olfr1034              | N/A | N/A |
| 10473496 | Olfr1036                           | N/A | N/A |
| 10473505 | Olfr1076                           | N/A | N/A |
| 10473507 | Olfr1093                           | N/A | N/A |
| 10473511 | Olfr1102                           | N/A | N/A |
| 10473513 | Olfr1112                           | N/A | N/A |
| 10473515 | Olfr1113                           | N/A | N/A |
| 10473517 | ---                                | N/A | N/A |
| 10473519 | Olfr1115                           | N/A | N/A |
| 10473523 | Olfr1118-ps /// Olfr1116-ps        | N/A | N/A |
| 10473525 | Olfr1118-ps                        | N/A | N/A |
| 10473528 | Olfr1120                           | N/A | N/A |
| 10473537 | Olfr1123                           | N/A | N/A |
| 10473539 | Olfr1124                           | N/A | N/A |
| 10473541 | Olfr1126                           | N/A | N/A |
| 10473547 | Srp9                               | N/A | N/A |
| 10473551 | Olfr153                            | N/A | N/A |
| 10473553 | Olfr1126 /// Olfr1129 /// Olfr1130 | N/A | N/A |
| 10473557 | Olfr1131                           | N/A | N/A |
| 10473562 | Olfr152                            | N/A | N/A |
| 10473564 | Olfr1143                           | N/A | N/A |
| 10473566 | Olfr1145                           | N/A | N/A |
| 10473568 | ---                                | N/A | N/A |
| 10473570 | Olfr1148                           | N/A | N/A |
| 10473572 | ---                                | N/A | N/A |
| 10473574 | Olfr1151                           | N/A | N/A |
| 10473578 | Olfr1153                           | N/A | N/A |
| 10473580 | Olfr1158                           | N/A | N/A |
| 10473584 | ---                                | N/A | N/A |
| 10473586 | Olfr1168                           | N/A | N/A |
| 10473592 | Olfr1183                           | N/A | N/A |
| 10473594 | Olfr1184                           | N/A | N/A |
| 10473596 | ---                                | N/A | N/A |
| 10473600 | Olfr1188                           | N/A | N/A |
| 10473602 | Olfr1189                           | N/A | N/A |
| 10473606 | ---                                | N/A | N/A |
| 10473608 | Olfr1193                           | N/A | N/A |
| 10473610 | Olfr1206 /// Olfr1201 /// Olfr1203 | N/A | N/A |
| 10473612 | Olfr1202                           | N/A | N/A |
| 10473614 | Olfr1203                           | N/A | N/A |
| 10473616 | Olfr1204                           | N/A | N/A |
| 10473622 | Olfr1255                           | N/A | N/A |
| 10473630 | Olfr1260                           | N/A | N/A |
| 10473639 | Olfr1263                           | N/A | N/A |
| 10473641 | Olfr1265                           | N/A | N/A |
| 10473648 | Olfr1274-ps                        | N/A | N/A |
| 10473650 | Nup160                             | N/A | N/A |
| 10473690 | Frbp4                              | N/A | N/A |
| 10473737 | Mtch2                              | N/A | N/A |
| 10473760 | Celf1                              | N/A | N/A |
| 10473793 | Psmc3                              | N/A | N/A |
| 10473809 | Sfpi1                              | N/A | N/A |
| 10473847 | Acp2 /// Ddb2                      | N/A | N/A |
| 10473874 | Arfgap2 /// 110051M20Rik           | N/A | N/A |
| 10473919 | Ckap5                              | N/A | N/A |
| 10473965 | Arhgap1                            | N/A | N/A |
| 10473976 | Harbi1                             | N/A | N/A |
| 10473981 | Ambra1                             | N/A | N/A |
| 10474002 | Chrm4                              | N/A | N/A |
| 10474004 | Dgkz /// Gm9821                    | N/A | N/A |
| 10474006 | Phf21a                             | N/A | N/A |
| 10474028 | Pex16                              | N/A | N/A |
| 10474041 | 1700029I15Rik                      | N/A | N/A |

|          |                              |     |     |
|----------|------------------------------|-----|-----|
| 10474045 | Chst1                        | N/A | N/A |
| 10474048 | Syt13                        | N/A | N/A |
| 10474064 | Trp53i11                     | N/A | N/A |
| 10474073 | ---                          | N/A | N/A |
| 10474077 | ---                          | N/A | N/A |
| 10474079 | Gm10803                      | N/A | N/A |
| 10474093 | 2810002D19Rik /// Ttc17      | N/A | N/A |
| 10474096 | Lrrc4c                       | N/A | N/A |
| 10474102 | ---                          | N/A | N/A |
| 10474112 | Traf6                        | N/A | N/A |
| 10474123 | Commnd9                      | N/A | N/A |
| 10474129 | Pamr1                        | N/A | N/A |
| 10474141 | Slc1a2                       | N/A | N/A |
| 10474169 | ---                          | N/A | N/A |
| 10474181 | Abtb2                        | N/A | N/A |
| 10474199 | ---                          | N/A | N/A |
| 10474201 | Lmo2                         | N/A | N/A |
| 10474207 | Fbxo3                        | N/A | N/A |
| 10474221 | Gm10912                      | N/A | N/A |
| 10474223 | Cd59b                        | N/A | N/A |
| 10474229 | Cd59a /// Cd59b              | N/A | N/A |
| 10474234 | A930018P22Rik                | N/A | N/A |
| 10474239 | Gapdh                        | N/A | N/A |
| 10474241 | ---                          | N/A | N/A |
| 10474269 | Gm6306                       | N/A | N/A |
| 10474307 | 0610012H03Rik                | N/A | N/A |
| 10474333 | Elp4                         | N/A | N/A |
| 10474339 | Gm10795                      | N/A | N/A |
| 10474355 | Dcdc5                        | N/A | N/A |
| 10474369 | C130023O10Rik                | N/A | N/A |
| 10474371 | Gm16488                      | N/A | N/A |
| 10474373 | Kcna4                        | N/A | N/A |
| 10474379 | Hadhb                        | N/A | N/A |
| 10474411 | Lin7c                        | N/A | N/A |
| 10474419 | Lgr4                         | N/A | N/A |
| 10474477 | ---                          | N/A | N/A |
| 10474479 | Olf1276                      | N/A | N/A |
| 10474481 | Olf1278                      | N/A | N/A |
| 10474483 | Olf1279                      | N/A | N/A |
| 10474492 | Olf1284                      | N/A | N/A |
| 10474497 | Olf1280                      | N/A | N/A |
| 10474499 | Olf1288                      | N/A | N/A |
| 10474504 | Olf1289                      | N/A | N/A |
| 10474514 | Olf1301                      | N/A | N/A |
| 10474518 | ---                          | N/A | N/A |
| 10474520 | Tdh                          | N/A | N/A |
| 10474524 | Olf1318 /// Olf1317          | N/A | N/A |
| 10474526 | Lpcat4                       | N/A | N/A |
| 10474541 | Nop10                        | N/A | N/A |
| 10474545 | Slc12a6                      | N/A | N/A |
| 10474573 | Slc12a6                      | N/A | N/A |
| 10474575 | Slc12a6                      | N/A | N/A |
| 10474619 | Fmn1                         | N/A | N/A |
| 10474642 | BC052040                     | N/A | N/A |
| 10474669 | Rpl27a /// Gm5908 /// Gm6378 | N/A | N/A |
| 10474671 | Spred1                       | N/A | N/A |
| 10474683 | Mir674                       | N/A | N/A |
| 10474685 | ---                          | N/A | N/A |
| 10474687 | ---                          | N/A | N/A |
| 10474689 | Fam98b                       | N/A | N/A |
| 10474725 | Eif2ak4                      | N/A | N/A |
| 10474793 | Pak6                         | N/A | N/A |
| 10474807 | 5430417L22Rik                | N/A | N/A |
| 10474814 | Disp2                        | N/A | N/A |
| 10474836 | lvd                          | N/A | N/A |
| 10474867 | ---                          | N/A | N/A |
| 10474870 | Rpusd2                       | N/A | N/A |
| 10474915 | Gchfr                        | N/A | N/A |
| 10474919 | Gm14137                      | N/A | N/A |
| 10474950 | Vps18                        | N/A | N/A |
| 10474977 | 1500003O03Rik                | N/A | N/A |
| 10474998 | ---                          | N/A | N/A |
| 10475000 | Rtf1                         | N/A | N/A |
| 10475027 | Tyro3                        | N/A | N/A |
| 10475051 | Mga                          | N/A | N/A |
| 10475080 | Mapkbp1                      | N/A | N/A |
| 10475199 | Snap23                       | N/A | N/A |
| 10475211 | Haus2                        | N/A | N/A |
| 10475218 | Stard9                       | N/A | N/A |
| 10475226 | Stard9                       | N/A | N/A |
| 10475245 | Ubr1                         | N/A | N/A |
| 10475247 | Tmem62                       | N/A | N/A |
| 10475262 | ---                          | N/A | N/A |
| 10475264 | Ccndbp1                      | N/A | N/A |

|          |                                     |     |     |
|----------|-------------------------------------|-----|-----|
| 10475280 | Adal                                | N/A | N/A |
| 10475293 | Tubgcp4                             | N/A | N/A |
| 10475314 | Mtap1a                              | N/A | N/A |
| 10475324 | Ckmt1                               | N/A | N/A |
| 10475335 | Pdia3                               | N/A | N/A |
| 10475350 | Serinc4 /// Serf2 /// 2310003F16Rik | N/A | N/A |
| 10475360 | Mrpl51                              | N/A | N/A |
| 10475378 | Casc4                               | N/A | N/A |
| 10475394 | Ctdspl2                             | N/A | N/A |
| 10475405 | Eif3j                               | N/A | N/A |
| 10475414 | B2m                                 | N/A | N/A |
| 10475435 | Rps12 /// Gm10063 /// Rps12-ps2     | N/A | N/A |
| 10475437 | Sord                                | N/A | N/A |
| 10475514 | ---                                 | N/A | N/A |
| 10475525 | Pldn                                | N/A | N/A |
| 10475532 | Sqrdl                               | N/A | N/A |
| 10475544 | Sema6d                              | N/A | N/A |
| 10475578 | Ctxn2                               | N/A | N/A |
| 10475623 | Fbn1 /// Gm9913                     | N/A | N/A |
| 10475625 | Eid1                                | N/A | N/A |
| 10475630 | Galk2                               | N/A | N/A |
| 10475648 | Dtwd1                               | N/A | N/A |
| 10475653 | Slc27a2                             | N/A | N/A |
| 10475665 | Usp8                                | N/A | N/A |
| 10475708 | Blvra                               | N/A | N/A |
| 10475718 | Snrnp200 /// Ciao1                  | N/A | N/A |
| 10475767 | Tmem127                             | N/A | N/A |
| 10475772 | Stard7                              | N/A | N/A |
| 10475800 | Adra2b                              | N/A | N/A |
| 10475830 | Mrps5                               | N/A | N/A |
| 10475843 | Gm10765                             | N/A | N/A |
| 10475866 | Bcl2l11                             | N/A | N/A |
| 10475890 | Mertk                               | N/A | N/A |
| 10475910 | ---                                 | N/A | N/A |
| 10475912 | Tmem87b                             | N/A | N/A |
| 10475941 | Zc3h6                               | N/A | N/A |
| 10475957 | Ttl                                 | N/A | N/A |
| 10475965 | Polr1b                              | N/A | N/A |
| 10475981 | Chchd5                              | N/A | N/A |
| 10475987 | Setd3                               | N/A | N/A |
| 10475990 | Slc20a1                             | N/A | N/A |
| 10476021 | Sirpa                               | N/A | N/A |
| 10476033 | Stk35                               | N/A | N/A |
| 10476093 | Nop56                               | N/A | N/A |
| 10476102 | ---                                 | N/A | N/A |
| 10476104 | ---                                 | N/A | N/A |
| 10476106 | Snord57                             | N/A | N/A |
| 10476130 | 1700020A23Rik                       | N/A | N/A |
| 10476133 | 4933425O20Rik                       | N/A | N/A |
| 10476136 | Vps16                               | N/A | N/A |
| 10476163 | Ptpa                                | N/A | N/A |
| 10476189 | Mrps26                              | N/A | N/A |
| 10476192 | Oxt                                 | N/A | N/A |
| 10476197 | Itpa                                | N/A | N/A |
| 10476207 | Atrn                                | N/A | N/A |
| 10476270 | 2310035K24Rik                       | N/A | N/A |
| 10476276 | Mavs                                | N/A | N/A |
| 10476297 | Mir103-2                            | N/A | N/A |
| 10476299 | ---                                 | N/A | N/A |
| 10476312 | 4930425F17Rik                       | N/A | N/A |
| 10476314 | Prnp /// Prnd                       | N/A | N/A |
| 10476319 | Prnd                                | N/A | N/A |
| 10476326 | Cds2                                | N/A | N/A |
| 10476347 | AU019990                            | N/A | N/A |
| 10476349 | 1110034G24Rik                       | N/A | N/A |
| 10476353 | ---                                 | N/A | N/A |
| 10476355 | Chgb                                | N/A | N/A |
| 10476383 | Crls1                               | N/A | N/A |
| 10476395 | Bmp2                                | N/A | N/A |
| 10476399 | LOC280487                           | N/A | N/A |
| 10476401 | Plcb1                               | N/A | N/A |
| 10476441 | Rpl29 /// Gm3550 /// Rpl29-ps2      | N/A | N/A |
| 10476443 | Plcb4                               | N/A | N/A |
| 10476482 | 6330527O06Rik                       | N/A | N/A |
| 10476497 | Ankrd5                              | N/A | N/A |
| 10476512 | Snap25                              | N/A | N/A |
| 10476526 | 2210009G21Rik                       | N/A | N/A |
| 10476538 | Btbd3                               | N/A | N/A |
| 10476560 | Ism1                                | N/A | N/A |
| 10476582 | MacroD2                             | N/A | N/A |
| 10476588 | MacroD2                             | N/A | N/A |
| 10476590 | MacroD2                             | N/A | N/A |
| 10476592 | MacroD2                             | N/A | N/A |
| 10476594 | MacroD2                             | N/A | N/A |

|          |                                     |     |     |
|----------|-------------------------------------|-----|-----|
| 10476612 | ---                                 | N/A | N/A |
| 10476614 | ---                                 | N/A | N/A |
| 10476633 | Pcsk2                               | N/A | N/A |
| 10476648 | Dstn                                | N/A | N/A |
| 10476658 | ---                                 | N/A | N/A |
| 10476668 | Csrp2bp /// Pet117                  | N/A | N/A |
| 10476680 | Zfp133 /// LOC668917                | N/A | N/A |
| 10476689 | LOC668917                           | N/A | N/A |
| 10476691 | Polr3f                              | N/A | N/A |
| 10476702 | Sec23b                              | N/A | N/A |
| 10476725 | Gm561                               | N/A | N/A |
| 10476728 | Dtd1                                | N/A | N/A |
| 10476735 | ---                                 | N/A | N/A |
| 10476740 | Slc24a3                             | N/A | N/A |
| 10476775 | Naa20                               | N/A | N/A |
| 10476782 | 4930529M08Rik                       | N/A | N/A |
| 10476791 | 4930529M08Rik                       | N/A | N/A |
| 10476793 | 4930529M08Rik                       | N/A | N/A |
| 10476795 | 4930529M08Rik                       | N/A | N/A |
| 10476817 | Atpaf1                              | N/A | N/A |
| 10476819 | Plk1s1                              | N/A | N/A |
| 10476834 | Xrn2                                | N/A | N/A |
| 10476868 | ---                                 | N/A | N/A |
| 10476872 | ---                                 | N/A | N/A |
| 10476880 | ---                                 | N/A | N/A |
| 10476882 | ---                                 | N/A | N/A |
| 10476886 | Sstr4                               | N/A | N/A |
| 10476889 | Nxt1                                | N/A | N/A |
| 10476893 | Gzf1                                | N/A | N/A |
| 10476931 | Cst10                               | N/A | N/A |
| 10476935 | Tmem90b                             | N/A | N/A |
| 10476939 | Gm4979 /// 3300002I08Rik /// Zfp442 | N/A | N/A |
| 10476941 | ---                                 | N/A | N/A |
| 10476952 | Entpd6                              | N/A | N/A |
| 10476969 | Pygb                                | N/A | N/A |
| 10476998 | ---                                 | N/A | N/A |
| 10477001 | ---                                 | N/A | N/A |
| 10477004 | ---                                 | N/A | N/A |
| 10477006 | Nsf1c                               | N/A | N/A |
| 10477012 | Fkbp1a                              | N/A | N/A |
| 10477058 | Scrt2                               | N/A | N/A |
| 10477073 | Csnk2a1                             | N/A | N/A |
| 10477090 | Tbc1d20                             | N/A | N/A |
| 10477100 | ---                                 | N/A | N/A |
| 10477103 | Nrsn2 /// Gm14164                   | N/A | N/A |
| 10477120 | ---                                 | N/A | N/A |
| 10477122 | Defb20                              | N/A | N/A |
| 10477129 | Defb21                              | N/A | N/A |
| 10477147 | H13                                 | N/A | N/A |
| 10477167 | Mcts2                               | N/A | N/A |
| 10477176 | ---                                 | N/A | N/A |
| 10477233 | Xkr7                                | N/A | N/A |
| 10477264 | Tm9sf4                              | N/A | N/A |
| 10477286 | Pofut1                              | N/A | N/A |
| 10477311 | Asxl1                               | N/A | N/A |
| 10477353 | Mapre1                              | N/A | N/A |
| 10477370 | Tomm20                              | N/A | N/A |
| 10477543 | Cbfa2t2                             | N/A | N/A |
| 10477555 | 1700007I08Rik                       | N/A | N/A |
| 10477557 | Zfp341                              | N/A | N/A |
| 10477572 | Chmp4b                              | N/A | N/A |
| 10477583 | a /// Raly                          | N/A | N/A |
| 10477604 | Itch                                | N/A | N/A |
| 10477630 | Dynlrb1                             | N/A | N/A |
| 10477637 | Map1lc3a                            | N/A | N/A |
| 10477642 | Mir695                              | N/A | N/A |
| 10477644 | Trp53inp2                           | N/A | N/A |
| 10477649 | Acsc2                               | N/A | N/A |
| 10477715 | Mir499                              | N/A | N/A |
| 10477777 | Ergic3                              | N/A | N/A |
| 10477808 | Romo1                               | N/A | N/A |
| 10477813 | Rbm39                               | N/A | N/A |
| 10477815 | Phf20                               | N/A | N/A |
| 10477852 | ---                                 | N/A | N/A |
| 10477854 | Epb4.111                            | N/A | N/A |
| 10477894 | ---                                 | N/A | N/A |
| 10477929 | 111008F13Rik /// Sla2               | N/A | N/A |
| 10477942 | Rbl1                                | N/A | N/A |
| 10477944 | ---                                 | N/A | N/A |
| 10477946 | Rpn2                                | N/A | N/A |
| 10477966 | Manbal                              | N/A | N/A |
| 10477970 | Src                                 | N/A | N/A |
| 10477986 | Nnat                                | N/A | N/A |
| 10477991 | ---                                 | N/A | N/A |

|          |                                                     |     |     |
|----------|-----------------------------------------------------|-----|-----|
| 10477994 | Ctnnb1                                              | N/A | N/A |
| 10478012 | Ube2i                                               | N/A | N/A |
| 10478014 | Vstm2l                                              | N/A | N/A |
| 10478022 | Rprd1b                                              | N/A | N/A |
| 10478066 | Snhg11                                              | N/A | N/A |
| 10478073 | ---                                                 | N/A | N/A |
| 10478075 | ---                                                 | N/A | N/A |
| 10478124 | Slc32a1                                             | N/A | N/A |
| 10478133 | Actr5                                               | N/A | N/A |
| 10478145 | Ppp1r16b                                            | N/A | N/A |
| 10478169 | Dhx35                                               | N/A | N/A |
| 10478196 | Top1                                                | N/A | N/A |
| 10478281 | ---                                                 | N/A | N/A |
| 10478285 | 9430021M05Rik                                       | N/A | N/A |
| 10478289 | ---                                                 | N/A | N/A |
| 10478291 | Srsf6                                               | N/A | N/A |
| 10478326 | Sgk2                                                | N/A | N/A |
| 10478341 | Ift52                                               | N/A | N/A |
| 10478364 | Tox2                                                | N/A | N/A |
| 10478374 | Gdap11                                              | N/A | N/A |
| 10478389 | Hnf4a                                               | N/A | N/A |
| 10478401 | Ttpal                                               | N/A | N/A |
| 10478407 | 0610039K10Rik /// Serinc3                           | N/A | N/A |
| 10478421 | Kcnk15                                              | N/A | N/A |
| 10478424 | Ywhab                                               | N/A | N/A |
| 10478447 | Stk4                                                | N/A | N/A |
| 10478487 | Sys1                                                | N/A | N/A |
| 10478508 | Pigt                                                | N/A | N/A |
| 10478523 | ---                                                 | N/A | N/A |
| 10478533 | ---                                                 | N/A | N/A |
| 10478540 | Wfdc10                                              | N/A | N/A |
| 10478560 | Dnrtip1                                             | N/A | N/A |
| 10478587 | Zswim3 /// Acot8                                    | N/A | N/A |
| 10478590 | Zswim1                                              | N/A | N/A |
| 10478594 | Ctsa                                                | N/A | N/A |
| 10478615 | Pcif1                                               | N/A | N/A |
| 10478647 | Slc12a5                                             | N/A | N/A |
| 10478718 | Ncoa3                                               | N/A | N/A |
| 10478744 | ---                                                 | N/A | N/A |
| 10478746 | LOC280487                                           | N/A | N/A |
| 10478772 | Arfgef2                                             | N/A | N/A |
| 10478776 | Arfgef2                                             | N/A | N/A |
| 10478778 | Arfgef2                                             | N/A | N/A |
| 10478799 | Cse1l                                               | N/A | N/A |
| 10478825 | Ddx27                                               | N/A | N/A |
| 10478847 | 1500012F01Rik /// Znfx1                             | N/A | N/A |
| 10478854 | Slc9a8                                              | N/A | N/A |
| 10478890 | Cebpb                                               | N/A | N/A |
| 10478897 | Ptpn1                                               | N/A | N/A |
| 10478907 | Pard6b                                              | N/A | N/A |
| 10478922 | ---                                                 | N/A | N/A |
| 10478924 | Gm9873                                              | N/A | N/A |
| 10478926 | 1700101G07Rik                                       | N/A | N/A |
| 10478928 | Tshz2                                               | N/A | N/A |
| 10478936 | ---                                                 | N/A | N/A |
| 10478938 | Hax1                                                | N/A | N/A |
| 10478943 | Pfdn4 /// Cyp24a1                                   | N/A | N/A |
| 10478949 | Dok5                                                | N/A | N/A |
| 10478959 | Mc3r                                                | N/A | N/A |
| 10478962 | 2010011I20Rik                                       | N/A | N/A |
| 10478967 | Cstf1                                               | N/A | N/A |
| 10478983 | 2410001C21Rik                                       | N/A | N/A |
| 10478994 | 1700029J11Rik                                       | N/A | N/A |
| 10479047 | Pck1                                                | N/A | N/A |
| 10479063 | Rab22a                                              | N/A | N/A |
| 10479074 | 1700010B08Rik                                       | N/A | N/A |
| 10479087 | Stx16                                               | N/A | N/A |
| 10479099 | Npepl1                                              | N/A | N/A |
| 10479112 | Gnas                                                | N/A | N/A |
| 10479136 | Th1l                                                | N/A | N/A |
| 10479154 | Tubb1                                               | N/A | N/A |
| 10479159 | Zfp831                                              | N/A | N/A |
| 10479172 | ---                                                 | N/A | N/A |
| 10479174 | Rps8 /// Gm11353 /// Rps8-ps1                       | N/A | N/A |
| 10479176 | Gm6710                                              | N/A | N/A |
| 10479182 | 0610010B08Rik                                       | N/A | N/A |
| 10479185 | ---                                                 | N/A | N/A |
| 10479187 | Rps8 /// Gm11353 /// Rps8-ps1                       | N/A | N/A |
| 10479189 | 0610010B08Rik /// Gm14430                           | N/A | N/A |
| 10479192 | 0610010B08Rik /// Gm14430 /// Gm14434               | N/A | N/A |
| 10479195 | 100043387 /// 0610010B08Rik                         | N/A | N/A |
| 10479198 | 0610010B08Rik                                       | N/A | N/A |
| 10479203 | Gm14322 /// 2210418O10Rik /// Gm14403 /// LOC664987 | N/A | N/A |
| 10479215 | Rps8 /// Gm11353 /// Rps8-ps1                       | N/A | N/A |

|          |                                                                           |     |     |
|----------|---------------------------------------------------------------------------|-----|-----|
| 10479217 | Gm8898 /// Gm14431 /// Gm14430 /// Gm6710 /// Gm14420                     | N/A | N/A |
| 10479221 | Gm14403                                                                   | N/A | N/A |
| 10479228 | Etohi1                                                                    | N/A | N/A |
| 10479230 | Phactr3                                                                   | N/A | N/A |
| 10479247 | 9030418K01Rik                                                             | N/A | N/A |
| 10479268 | Wtap                                                                      | N/A | N/A |
| 10479274 | Cdh4                                                                      | N/A | N/A |
| 10479294 | ---                                                                       | N/A | N/A |
| 10479297 | Lsm14b                                                                    | N/A | N/A |
| 10479311 | Ss18l1                                                                    | N/A | N/A |
| 10479324 | Gtpbp5                                                                    | N/A | N/A |
| 10479335 | Osbpl2                                                                    | N/A | N/A |
| 10479351 | Adrm1                                                                     | N/A | N/A |
| 10479362 | Rps21                                                                     | N/A | N/A |
| 10479375 | Mir1-1                                                                    | N/A | N/A |
| 10479397 | Ntsr1                                                                     | N/A | N/A |
| 10479411 | Ogfr                                                                      | N/A | N/A |
| 10479458 | 2310003C23Rik                                                             | N/A | N/A |
| 10479490 | Arfgap1                                                                   | N/A | N/A |
| 10479510 | 9230112E08Rik /// Col20a1                                                 | N/A | N/A |
| 10479556 | BC051628                                                                  | N/A | N/A |
| 10479560 | Rtel1                                                                     | N/A | N/A |
| 10479607 | Lime1                                                                     | N/A | N/A |
| 10479615 | ---                                                                       | N/A | N/A |
| 10479625 | BC050777                                                                  | N/A | N/A |
| 10479627 | Tpd52l2                                                                   | N/A | N/A |
| 10479639 | Dnajc5                                                                    | N/A | N/A |
| 10479649 | Prpf6                                                                     | N/A | N/A |
| 10479672 | Tcea2                                                                     | N/A | N/A |
| 10479685 | Opr1                                                                      | N/A | N/A |
| 10479698 | Myt1                                                                      | N/A | N/A |
| 10479726 | Pcmdt2                                                                    | N/A | N/A |
| 10479736 | Polr3k                                                                    | N/A | N/A |
| 10479740 | ---                                                                       | N/A | N/A |
| 10479747 | ---                                                                       | N/A | N/A |
| 10479749 | Rpp38                                                                     | N/A | N/A |
| 10479775 | Hspa14                                                                    | N/A | N/A |
| 10479792 | ---                                                                       | N/A | N/A |
| 10479794 | Prpf18                                                                    | N/A | N/A |
| 10479807 | ---                                                                       | N/A | N/A |
| 10479833 | Optn                                                                      | N/A | N/A |
| 10479869 | Cdc123                                                                    | N/A | N/A |
| 10479884 | Nudt5 /// Gm13199                                                         | N/A | N/A |
| 10479887 | Sec61a2                                                                   | N/A | N/A |
| 10479902 | Dhtkd1                                                                    | N/A | N/A |
| 10479938 | Echdc3                                                                    | N/A | N/A |
| 10479948 | Celf2                                                                     | N/A | N/A |
| 10479950 | Celf2                                                                     | N/A | N/A |
| 10479971 | Gm10855                                                                   | N/A | N/A |
| 10479973 | Gm10115                                                                   | N/A | N/A |
| 10479975 | ---                                                                       | N/A | N/A |
| 10479979 | Slc25a36                                                                  | N/A | N/A |
| 10479988 | Taf3                                                                      | N/A | N/A |
| 10479996 | Atp5c1                                                                    | N/A | N/A |
| 10480003 | Itih2                                                                     | N/A | N/A |
| 10480032 | Gapdh /// Gm16374 /// Gm2606 /// Gm4609 /// Gm3200 /// Gm2451 /// Gm10293 | N/A | N/A |
| 10480057 | Rbm17                                                                     | N/A | N/A |
| 10480064 | Fbxo18                                                                    | N/A | N/A |
| 10480087 | ---                                                                       | N/A | N/A |
| 10480121 | Fam188a                                                                   | N/A | N/A |
| 10480139 | C1ql3 /// Pter                                                            | N/A | N/A |
| 10480145 | Rsu1                                                                      | N/A | N/A |
| 10480238 | St8sia6                                                                   | N/A | N/A |
| 10480254 | Cacnb2                                                                    | N/A | N/A |
| 10480256 | Gm10848                                                                   | N/A | N/A |
| 10480273 | ---                                                                       | N/A | N/A |
| 10480275 | Nebi                                                                      | N/A | N/A |
| 10480284 | Nebi                                                                      | N/A | N/A |
| 10480286 | Nebi                                                                      | N/A | N/A |
| 10480314 | ---                                                                       | N/A | N/A |
| 10480321 | A930004D18Rik                                                             | N/A | N/A |
| 10480324 | 2810030E01Rik                                                             | N/A | N/A |
| 10480329 | Dnajc1                                                                    | N/A | N/A |
| 10480345 | ---                                                                       | N/A | N/A |
| 10480347 | Pip4k2a                                                                   | N/A | N/A |
| 10480379 | Mrps5                                                                     | N/A | N/A |
| 10480381 | Arhgap21                                                                  | N/A | N/A |
| 10480414 | Enkur                                                                     | N/A | N/A |
| 10480421 | Pdss1                                                                     | N/A | N/A |
| 10480423 | Abi1                                                                      | N/A | N/A |
| 10480445 | Spopl                                                                     | N/A | N/A |
| 10480459 | Hnmt                                                                      | N/A | N/A |
| 10480492 | Cacna1b                                                                   | N/A | N/A |
| 10480570 | Arrdc1                                                                    | N/A | N/A |

|          |                          |     |     |
|----------|--------------------------|-----|-----|
| 10480579 | Mrpl41 /// Wdr85         | N/A | N/A |
| 10480583 | ---                      | N/A | N/A |
| 10480601 | A830007P12Rik            | N/A | N/A |
| 10480605 | Cobra1                   | N/A | N/A |
| 10480628 | Tubb2c                   | N/A | N/A |
| 10480646 | Gm757                    | N/A | N/A |
| 10480649 | 2310002J15Rik            | N/A | N/A |
| 10480652 | Ndor1                    | N/A | N/A |
| 10480672 | Ssna1                    | N/A | N/A |
| 10480676 | Grin1                    | N/A | N/A |
| 10480699 | Dpp7                     | N/A | N/A |
| 10480714 | Uap1l1                   | N/A | N/A |
| 10480734 | Ptgds                    | N/A | N/A |
| 10480751 | C8g                      | N/A | N/A |
| 10480808 | Gm996                    | N/A | N/A |
| 10480813 | B230208H17Rik            | N/A | N/A |
| 10480842 | Tmem141                  | N/A | N/A |
| 10480878 | Camsap1                  | N/A | N/A |
| 10480901 | Nacc2                    | N/A | N/A |
| 10480921 | Qsox2                    | N/A | N/A |
| 10480937 | C030048H21Rik            | N/A | N/A |
| 10480939 | 4932418E24Rik            | N/A | N/A |
| 10480999 | Sdccag3                  | N/A | N/A |
| 10481011 | Inpp5e /// Pmpca         | N/A | N/A |
| 10481023 | Sec16a                   | N/A | N/A |
| 10481101 | Snhg7 /// Snora43        | N/A | N/A |
| 10481111 | ---                      | N/A | N/A |
| 10481122 | Surf6                    | N/A | N/A |
| 10481128 | Med22                    | N/A | N/A |
| 10481147 | Surf4                    | N/A | N/A |
| 10481164 | Slc2a6                   | N/A | N/A |
| 10481182 | Fam163b                  | N/A | N/A |
| 10481186 | Sardh                    | N/A | N/A |
| 10481259 | Col5a1                   | N/A | N/A |
| 10481272 | 1700007K13Rik            | N/A | N/A |
| 10481291 | Gtf3c5                   | N/A | N/A |
| 10481320 | Gtf3c4                   | N/A | N/A |
| 10481337 | 1700101E01Rik            | N/A | N/A |
| 10481344 | Gapdh /// Gm2606         | N/A | N/A |
| 10481366 | Rapgef1                  | N/A | N/A |
| 10481368 | Trub2 /// Coq4           | N/A | N/A |
| 10481378 | Mir219-2                 | N/A | N/A |
| 10481380 | Cercam                   | N/A | N/A |
| 10481383 | Wdr34                    | N/A | N/A |
| 10481393 | Zdhhc12                  | N/A | N/A |
| 10481401 | Zer1                     | N/A | N/A |
| 10481420 | D2Wsu81e /// Endog       | N/A | N/A |
| 10481435 | Ccb1                     | N/A | N/A |
| 10481451 | 1700084E18Rik /// Lrrc8a | N/A | N/A |
| 10481453 | Dolk                     | N/A | N/A |
| 10481496 | ---                      | N/A | N/A |
| 10481508 | Asb6                     | N/A | N/A |
| 10481518 | Ptges                    | N/A | N/A |
| 10481525 | Tor1a                    | N/A | N/A |
| 10481540 | Fnbp1                    | N/A | N/A |
| 10481566 | Fibcd1                   | N/A | N/A |
| 10481574 | Fam78a                   | N/A | N/A |
| 10481577 | Uck1                     | N/A | N/A |
| 10481585 | 2900010J23Rik            | N/A | N/A |
| 10481592 | Dnm1                     | N/A | N/A |
| 10481619 | ---                      | N/A | N/A |
| 10481627 | Lcn2                     | N/A | N/A |
| 10481649 | 9430097D07Rik            | N/A | N/A |
| 10481654 | Fpgs                     | N/A | N/A |
| 10481670 | Cdk9                     | N/A | N/A |
| 10481678 | 6330409D20Rik            | N/A | N/A |
| 10481711 | Stxbp1                   | N/A | N/A |
| 10481772 | Garnl3                   | N/A | N/A |
| 10481804 | Ralgps1                  | N/A | N/A |
| 10481827 | Zbtb34                   | N/A | N/A |
| 10481830 | Zbtb43                   | N/A | N/A |
| 10481845 | Fam125b                  | N/A | N/A |
| 10481857 | Pbx3                     | N/A | N/A |
| 10481868 | Dnajb6                   | N/A | N/A |
| 10481870 | Gapvd1                   | N/A | N/A |
| 10481900 | Rabepk                   | N/A | N/A |
| 10481909 | Fbxw2                    | N/A | N/A |
| 10481920 | Psmd5                    | N/A | N/A |
| 10481962 | Hc                       | N/A | N/A |
| 10482004 | Al182371                 | N/A | N/A |
| 10482017 | Rab14                    | N/A | N/A |
| 10482030 | Stom                     | N/A | N/A |
| 10482073 | ---                      | N/A | N/A |
| 10482075 | Ttll11                   | N/A | N/A |

|          |                   |     |     |
|----------|-------------------|-----|-----|
| 10482109 | Rbm18 /// Mrff    | N/A | N/A |
| 10482117 | Olfr341           | N/A | N/A |
| 10482119 | ---               | N/A | N/A |
| 10482121 | Olfr3             | N/A | N/A |
| 10482123 | Olfr351           | N/A | N/A |
| 10482125 | Olfr353           | N/A | N/A |
| 10482127 | Olfr355           | N/A | N/A |
| 10482129 | Olfr358           | N/A | N/A |
| 10482131 | Olfr360           | N/A | N/A |
| 10482133 | Olfr361           | N/A | N/A |
| 10482135 | Olfr362           | N/A | N/A |
| 10482139 | Pdcl              | N/A | N/A |
| 10482144 | Rc3h2             | N/A | N/A |
| 10482167 | Zbtb6             | N/A | N/A |
| 10482172 | Zbtb26 /// Zbtb6  | N/A | N/A |
| 10482177 | Strbp             | N/A | N/A |
| 10482181 | Strbp             | N/A | N/A |
| 10482200 | Dennd1a           | N/A | N/A |
| 10482229 | Psmb7             | N/A | N/A |
| 10482267 | Rpl35 /// Gm10269 | N/A | N/A |
| 10482301 | Scai              | N/A | N/A |
| 10482323 | Ppp6c             | N/A | N/A |
| 10482330 | Atp6v1g1          | N/A | N/A |
| 10482334 | ---               | N/A | N/A |
| 10482336 | Lrp1b             | N/A | N/A |
| 10482432 | ---               | N/A | N/A |
| 10482434 | Gtdc1             | N/A | N/A |
| 10482448 | Zeb2              | N/A | N/A |
| 10482467 | Orc4              | N/A | N/A |
| 10482484 | ---               | N/A | N/A |
| 10482486 | Mmadhc            | N/A | N/A |
| 10482500 | Rnd3              | N/A | N/A |
| 10482507 | Ppia              | N/A | N/A |
| 10482517 | Nmi               | N/A | N/A |
| 10482687 | Arl5a             | N/A | N/A |
| 10482695 | Cacnb4            | N/A | N/A |
| 10482712 | Stam2             | N/A | N/A |
| 10482731 | Prpf40a           | N/A | N/A |
| 10482762 | Idi1              | N/A | N/A |
| 10482766 | Rprm              | N/A | N/A |
| 10482788 | Gpd2              | N/A | N/A |
| 10482791 | ---               | N/A | N/A |
| 10482793 | ---               | N/A | N/A |
| 10482795 | Ermn              | N/A | N/A |
| 10482814 | Acvr1c            | N/A | N/A |
| 10482846 | Ccdc148           | N/A | N/A |
| 10482863 | ---               | N/A | N/A |
| 10482866 | Tanc1             | N/A | N/A |
| 10482918 | Gm13570           | N/A | N/A |
| 10482920 | Cd302             | N/A | N/A |
| 10483023 | Rbms1             | N/A | N/A |
| 10483025 | Rbms1             | N/A | N/A |
| 10483046 | Dpp4              | N/A | N/A |
| 10483110 | Ifih1             | N/A | N/A |
| 10483131 | Kcnh7             | N/A | N/A |
| 10483150 | Figl              | N/A | N/A |
| 10483161 | LOC280487         | N/A | N/A |
| 10483163 | Grb14             | N/A | N/A |
| 10483215 | Scn3a /// Scn1a   | N/A | N/A |
| 10483228 | Scn3a             | N/A | N/A |
| 10483246 | ---               | N/A | N/A |
| 10483299 | Scn1a             | N/A | N/A |
| 10483322 | ---               | N/A | N/A |
| 10483324 | Scn9a             | N/A | N/A |
| 10483326 | Scn9a             | N/A | N/A |
| 10483379 | F830016D02Rik     | N/A | N/A |
| 10483381 | Stk39             | N/A | N/A |
| 10483410 | Abcb11            | N/A | N/A |
| 10483521 | Fastkd1           | N/A | N/A |
| 10483536 | 4930578N16Rik     | N/A | N/A |
| 10483546 | ---               | N/A | N/A |
| 10483548 | Mettl5 /// Ssb    | N/A | N/A |
| 10483559 | ---               | N/A | N/A |
| 10483563 | Tlk1              | N/A | N/A |
| 10483604 | Slc25a12          | N/A | N/A |
| 10483624 | Dlx1as            | N/A | N/A |
| 10483631 | Gm13637           | N/A | N/A |
| 10483633 | Sp3               | N/A | N/A |
| 10483646 | Sp3               | N/A | N/A |
| 10483648 | Ola1              | N/A | N/A |
| 10483665 | Sp9               | N/A | N/A |
| 10483667 | Cir1              | N/A | N/A |
| 10483679 | Gpr155            | N/A | N/A |
| 10483698 | Wipf1             | N/A | N/A |



|          |                                |     |     |
|----------|--------------------------------|-----|-----|
| 10483719 | Chn1                           | N/A | N/A |
| 10483737 | Atf2                           | N/A | N/A |
| 10483756 | Atp5g3                         | N/A | N/A |
| 10483761 | ---                            | N/A | N/A |
| 10483766 | ---                            | N/A | N/A |
| 10483768 | ---                            | N/A | N/A |
| 10483770 | Lnp                            | N/A | N/A |
| 10483786 | Mrpl23                         | N/A | N/A |
| 10483806 | Rps6 /// Gm16409               | N/A | N/A |
| 10483809 | Nfe2l2                         | N/A | N/A |
| 10483817 | 6030499A19Rik                  | N/A | N/A |
| 10483819 | Ttc30b                         | N/A | N/A |
| 10483822 | Ttc30b /// Ttc30a2 /// Ttc30a1 | N/A | N/A |
| 10483824 | Ttc30a1                        | N/A | N/A |
| 10483828 | Pde11a                         | N/A | N/A |
| 10483856 | Prkra                          | N/A | N/A |
| 10483865 | Fkbp7                          | N/A | N/A |
| 10484190 | Ttn                            | N/A | N/A |
| 10484197 | Ccdc141                        | N/A | N/A |
| 10484205 | Ccdc141                        | N/A | N/A |
| 10484227 | Sestd1                         | N/A | N/A |
| 10484256 | 4930401B11Rik                  | N/A | N/A |
| 10484258 | ---                            | N/A | N/A |
| 10484283 | Pde1a                          | N/A | N/A |
| 10484318 | Nckap1                         | N/A | N/A |
| 10484351 | Sumo2                          | N/A | N/A |
| 10484353 | ---                            | N/A | N/A |
| 10484355 | LOC280487                      | N/A | N/A |
| 10484357 | Rps4x                          | N/A | N/A |
| 10484371 | Calcl1                         | N/A | N/A |
| 10484389 | Tfpi                           | N/A | N/A |
| 10484402 | Ctnnd1                         | N/A | N/A |
| 10484425 | 2700094K13Rik                  | N/A | N/A |
| 10484431 | Tmx2                           | N/A | N/A |
| 10484457 | Clp1                           | N/A | N/A |
| 10484461 | Mir130a                        | N/A | N/A |
| 10484463 | Serpinc1                       | N/A | N/A |
| 10484486 | P2rx3                          | N/A | N/A |
| 10484503 | Lrrc55                         | N/A | N/A |
| 10484508 | Olfir987                       | N/A | N/A |
| 10484510 | Olfir988                       | N/A | N/A |
| 10484516 | Olfir994                       | N/A | N/A |
| 10484539 | Olfir1006                      | N/A | N/A |
| 10484543 | Olfir1006                      | N/A | N/A |
| 10484547 | Olfir1016                      | N/A | N/A |
| 10484549 | Olfir1019                      | N/A | N/A |
| 10484553 | Olfir1024                      | N/A | N/A |
| 10484559 | Olfir1040                      | N/A | N/A |
| 10484561 | Olfir1042                      | N/A | N/A |
| 10484563 | Olfir1043                      | N/A | N/A |
| 10484565 | Olfir1044                      | N/A | N/A |
| 10484567 | Olfir52                        | N/A | N/A |
| 10484569 | Olfir1045                      | N/A | N/A |
| 10484571 | Olfir1046                      | N/A | N/A |
| 10484584 | ---                            | N/A | N/A |
| 10484586 | Olfir1054                      | N/A | N/A |
| 10484590 | Olfir1056                      | N/A | N/A |
| 10484592 | Olfir1057                      | N/A | N/A |
| 10484602 | Olfir1065 /// Olfir1058        | N/A | N/A |
| 10484604 | Olfir1065                      | N/A | N/A |
| 10484606 | Olfir1066                      | N/A | N/A |
| 10484608 | Olfir228                       | N/A | N/A |
| 10484610 | Olfir1077-ps1                  | N/A | N/A |
| 10484614 | Olfir1080                      | N/A | N/A |
| 10484616 | Olfir1082                      | N/A | N/A |
| 10484618 | Olfir1083                      | N/A | N/A |
| 10484624 | Olfir1086                      | N/A | N/A |
| 10484626 | Olfir1087                      | N/A | N/A |
| 10484628 | Olfir1089                      | N/A | N/A |
| 10484630 | Olfir1090                      | N/A | N/A |
| 10484632 | Olfir141                       | N/A | N/A |
| 10484640 | Olfir1099                      | N/A | N/A |
| 10484642 | Olfir1100                      | N/A | N/A |
| 10484644 | Olfir1101                      | N/A | N/A |
| 10484646 | ---                            | N/A | N/A |
| 10484648 | Olfir1104                      | N/A | N/A |
| 10484650 | Olfir1105                      | N/A | N/A |
| 10484652 | Olfir1106                      | N/A | N/A |
| 10484667 | ---                            | N/A | N/A |
| 10484679 | Olfir1132                      | N/A | N/A |
| 10484681 | Olfir1133                      | N/A | N/A |
| 10484685 | Olfir1135                      | N/A | N/A |
| 10484687 | Olfir1136                      | N/A | N/A |
| 10484689 | Olfir1137                      | N/A | N/A |

|          |                                    |     |     |
|----------|------------------------------------|-----|-----|
| 10484691 | Olfr1138                           | N/A | N/A |
| 10484693 | Olfr1141                           | N/A | N/A |
| 10484695 | ---                                | N/A | N/A |
| 10484697 | Olfr1154                           | N/A | N/A |
| 10484699 | Olfr1155                           | N/A | N/A |
| 10484704 | Olfr1157                           | N/A | N/A |
| 10484706 | Olfr74                             | N/A | N/A |
| 10484710 | Olfr73                             | N/A | N/A |
| 10484712 | Olfr1163 /// Olfr1162              | N/A | N/A |
| 10484716 | Olfr1164                           | N/A | N/A |
| 10484718 | Olfr1165-ps                        | N/A | N/A |
| 10484726 | Olfr1167 /// Olfr1170 /// Olfr1166 | N/A | N/A |
| 10484731 | Olfr1173                           | N/A | N/A |
| 10484733 | Olfr1174-ps                        | N/A | N/A |
| 10484735 | Olfr1175-ps                        | N/A | N/A |
| 10484739 | Olfr1179                           | N/A | N/A |
| 10484745 | Olfr1181                           | N/A | N/A |
| 10484747 | Olfr1182                           | N/A | N/A |
| 10484752 | Olfr1195                           | N/A | N/A |
| 10484754 | Olfr1196 /// Olfr1197              | N/A | N/A |
| 10484756 | Olfr1196 /// Olfr1197 /// Olfr1200 | N/A | N/A |
| 10484762 | Olfr1197 /// Olfr1200              | N/A | N/A |
| 10484764 | Olfr1208                           | N/A | N/A |
| 10484766 | Olfr1209                           | N/A | N/A |
| 10484775 | Olfr1215                           | N/A | N/A |
| 10484779 | Olfr1217                           | N/A | N/A |
| 10484781 | Olfr1218                           | N/A | N/A |
| 10484783 | Olfr1219                           | N/A | N/A |
| 10484791 | Olfr1222                           | N/A | N/A |
| 10484793 | Olfr1223                           | N/A | N/A |
| 10484799 | Olfr1225                           | N/A | N/A |
| 10484801 | Olfr1226                           | N/A | N/A |
| 10484805 | Olfr1229                           | N/A | N/A |
| 10484807 | Olfr1230                           | N/A | N/A |
| 10484809 | Olfr1231                           | N/A | N/A |
| 10484813 | Olfr1233                           | N/A | N/A |
| 10484816 | Olfr1234                           | N/A | N/A |
| 10484818 | Olfr1238                           | N/A | N/A |
| 10484820 | Olfr1239                           | N/A | N/A |
| 10484822 | Olfr1240                           | N/A | N/A |
| 10484824 | Olfr1241                           | N/A | N/A |
| 10484839 | Olfr1249                           | N/A | N/A |
| 10484846 | Olfr1252                           | N/A | N/A |
| 10484852 | Olfr1256                           | N/A | N/A |
| 10484854 | Olfr48                             | N/A | N/A |
| 10484856 | Olfr1259                           | N/A | N/A |
| 10484861 | Olfr140                            | N/A | N/A |
| 10484863 | Olfr1269 /// Olfr1265              | N/A | N/A |
| 10484865 | ---                                | N/A | N/A |
| 10484867 | Olfr1269                           | N/A | N/A |
| 10484880 | Olfr142                            | N/A | N/A |
| 10484882 | Olfr1271                           | N/A | N/A |
| 10484884 | Olfr1272                           | N/A | N/A |
| 10484894 | Ptprij                             | N/A | N/A |
| 10484912 | Ndufs3                             | N/A | N/A |
| 10484920 | Ptpmt1                             | N/A | N/A |
| 10484925 | Gm13777                            | N/A | N/A |
| 10484927 | Slc39a13                           | N/A | N/A |
| 10484987 | Nr1h3                              | N/A | N/A |
| 10485027 | F2                                 | N/A | N/A |
| 10485042 | Zfp408                             | N/A | N/A |
| 10485048 | Atg13                              | N/A | N/A |
| 10485068 | ---                                | N/A | N/A |
| 10485115 | Dgkz                               | N/A | N/A |
| 10485117 | Creb3l1                            | N/A | N/A |
| 10485151 | Mapk8ip1                           | N/A | N/A |
| 10485170 | Cry2                               | N/A | N/A |
| 10485183 | Slc35c1                            | N/A | N/A |
| 10485191 | Prdm11                             | N/A | N/A |
| 10485198 | Tspan18                            | N/A | N/A |
| 10485213 | Cd82                               | N/A | N/A |
| 10485225 | Ext2                               | N/A | N/A |
| 10485277 | ---                                | N/A | N/A |
| 10485280 | Gm13889                            | N/A | N/A |
| 10485282 | Alkbh3                             | N/A | N/A |
| 10485294 | Hsd17b12                           | N/A | N/A |
| 10485307 | Mir129-2                           | N/A | N/A |
| 10485309 | ---                                | N/A | N/A |
| 10485312 | Mir670                             | N/A | N/A |
| 10485314 | Ttc17                              | N/A | N/A |
| 10485340 | Itpa                               | N/A | N/A |
| 10485342 | 281002D19Rik /// Ttc17             | N/A | N/A |
| 10485344 | Api5                               | N/A | N/A |
| 10485355 | LOC280487                          | N/A | N/A |

|          |                              |     |     |
|----------|------------------------------|-----|-----|
| 10485357 | ---                          | N/A | N/A |
| 10485378 | Prr5l                        | N/A | N/A |
| 10485388 | Ldlrad3                      | N/A | N/A |
| 10485395 | Trim44                       | N/A | N/A |
| 10485402 | Fjx1                         | N/A | N/A |
| 10485466 | Cat                          | N/A | N/A |
| 10485546 | D430041D05Rik                | N/A | N/A |
| 10485550 | D430041D05Rik                | N/A | N/A |
| 10485562 | Hipk3                        | N/A | N/A |
| 10485580 | Cstf3                        | N/A | N/A |
| 10485582 | Tcp11l1                      | N/A | N/A |
| 10485594 | Pin1l                        | N/A | N/A |
| 10485597 | Depdc7                       | N/A | N/A |
| 10485622 | Qser1                        | N/A | N/A |
| 10485633 | Gm10796                      | N/A | N/A |
| 10485635 | Eif3m                        | N/A | N/A |
| 10485641 | ---                          | N/A | N/A |
| 10485643 | Al314831                     | N/A | N/A |
| 10485645 | Rcn1                         | N/A | N/A |
| 10485654 | Rpl10                        | N/A | N/A |
| 10485656 | Elp4                         | N/A | N/A |
| 10485667 | Dnajc24                      | N/A | N/A |
| 10485674 | 2700007P21Rik                | N/A | N/A |
| 10485685 | Rpl35a /// Ino80 /// Gm10247 | N/A | N/A |
| 10485687 | Mett5d1                      | N/A | N/A |
| 10485698 | ---                          | N/A | N/A |
| 10485700 | Bbox1                        | N/A | N/A |
| 10485711 | Fibin                        | N/A | N/A |
| 10485745 | Ano3                         | N/A | N/A |
| 10485767 | Olf1277                      | N/A | N/A |
| 10485769 | Olf1282                      | N/A | N/A |
| 10485771 | Olf1286                      | N/A | N/A |
| 10485777 | Olf1294                      | N/A | N/A |
| 10485790 | Olf1303                      | N/A | N/A |
| 10485792 | Gm13931                      | N/A | N/A |
| 10485794 | Olf1305                      | N/A | N/A |
| 10485798 | Olf1307                      | N/A | N/A |
| 10485800 | Olf1308                      | N/A | N/A |
| 10485802 | Olf1309                      | N/A | N/A |
| 10485807 | Olf1311                      | N/A | N/A |
| 10485809 | Olf1312                      | N/A | N/A |
| 10485811 | Olf1313                      | N/A | N/A |
| 10485813 | Olf1314                      | N/A | N/A |
| 10485828 | Slc12a6                      | N/A | N/A |
| 10485830 | Tmem85                       | N/A | N/A |
| 10485836 | Chrm5                        | N/A | N/A |
| 10485840 | Ryr3                         | N/A | N/A |
| 10485955 | Scg5                         | N/A | N/A |
| 10485979 | Gjd2                         | N/A | N/A |
| 10485989 | Aqr                          | N/A | N/A |
| 10486026 | Zfp770                       | N/A | N/A |
| 10486041 | Meis2                        | N/A | N/A |
| 10486057 | Rab5b                        | N/A | N/A |
| 10486059 | ---                          | N/A | N/A |
| 10486061 | Rasgrp1                      | N/A | N/A |
| 10486102 | Gpr176                       | N/A | N/A |
| 10486107 | Srp14                        | N/A | N/A |
| 10486112 | Bmf                          | N/A | N/A |
| 10486154 | A430105I19Rik                | N/A | N/A |
| 10486166 | Ccdc32                       | N/A | N/A |
| 10486172 | Fam82a2                      | N/A | N/A |
| 10486185 | Dnajc17                      | N/A | N/A |
| 10486197 | Rhov                         | N/A | N/A |
| 10486201 | Gm14207                      | N/A | N/A |
| 10486203 | Ino80                        | N/A | N/A |
| 10486284 | Ndufaf1                      | N/A | N/A |
| 10486290 | ---                          | N/A | N/A |
| 10486320 | 6330405D24Rik                | N/A | N/A |
| 10486322 | 6330405D24Rik                | N/A | N/A |
| 10486396 | Ehd4                         | N/A | N/A |
| 10486403 | Pla2g4e                      | N/A | N/A |
| 10486469 | Vps39                        | N/A | N/A |
| 10486522 | Zfp106                       | N/A | N/A |
| 10486552 | Lrrc57                       | N/A | N/A |
| 10486562 | ---                          | N/A | N/A |
| 10486595 | Ttbk2                        | N/A | N/A |
| 10486616 | Ubr1                         | N/A | N/A |
| 10486710 | Lcmt2                        | N/A | N/A |
| 10486712 | Zscan29                      | N/A | N/A |
| 10486722 | Trp53bp1                     | N/A | N/A |
| 10486858 | Mfap1b /// Mfap1a            | N/A | N/A |
| 10486867 | Mfap1b /// Mfap1a            | N/A | N/A |
| 10486875 | Frdm5                        | N/A | N/A |
| 10486898 | Spg11                        | N/A | N/A |

|          |                                                        |     |     |
|----------|--------------------------------------------------------|-----|-----|
| 10486954 | Dppa4                                                  | N/A | N/A |
| 10487011 | Gatm                                                   | N/A | N/A |
| 10487021 | Slc30a4                                                | N/A | N/A |
| 10487033 | Myef2                                                  | N/A | N/A |
| 10487154 | Secisbp2l                                              | N/A | N/A |
| 10487175 | Cops2                                                  | N/A | N/A |
| 10487267 | Polr2l /// Usp50                                       | N/A | N/A |
| 10487277 | Trpm7                                                  | N/A | N/A |
| 10487321 | 2010106G01Rik                                          | N/A | N/A |
| 10487359 | Itpril1                                                | N/A | N/A |
| 10487371 | Ciao1                                                  | N/A | N/A |
| 10487380 | Gm10766                                                | N/A | N/A |
| 10487392 | Kcnip3                                                 | N/A | N/A |
| 10487433 | Zfp661                                                 | N/A | N/A |
| 10487476 | 1500011K16Rik                                          | N/A | N/A |
| 10487506 | Gm14005                                                | N/A | N/A |
| 10487508 | Gm14005                                                | N/A | N/A |
| 10487510 | ---                                                    | N/A | N/A |
| 10487513 | Anapc1                                                 | N/A | N/A |
| 10487575 | Gm10762                                                | N/A | N/A |
| 10487588 | I11a                                                   | N/A | N/A |
| 10487595 | ---                                                    | N/A | N/A |
| 10487613 | Pdyn                                                   | N/A | N/A |
| 10487619 | Gm10183                                                | N/A | N/A |
| 10487629 | Idh3b                                                  | N/A | N/A |
| 10487643 | Rpl27a /// Gm5908 /// Rpl27a-ps1 /// Gm6378 /// Gm5453 | N/A | N/A |
| 10487685 | Avp                                                    | N/A | N/A |
| 10487690 | Ubox5 /// Fastkd5                                      | N/A | N/A |
| 10487700 | Prosapip1                                              | N/A | N/A |
| 10487711 | Ddrgk1                                                 | N/A | N/A |
| 10487748 | 4930402H24Rik                                          | N/A | N/A |
| 10487785 | A730017L22Rik                                          | N/A | N/A |
| 10487871 | Cenpb                                                  | N/A | N/A |
| 10487894 | Rassf2                                                 | N/A | N/A |
| 10487906 | Slc23a2                                                | N/A | N/A |
| 10487925 | Rpl18                                                  | N/A | N/A |
| 10487927 | 5730494N06Rik                                          | N/A | N/A |
| 10487930 | Pcna                                                   | N/A | N/A |
| 10487937 | Prokr2                                                 | N/A | N/A |
| 10487943 | Gm10757                                                | N/A | N/A |
| 10488010 | Hao1                                                   | N/A | N/A |
| 10488020 | Tmx4                                                   | N/A | N/A |
| 10488029 | Zfand1                                                 | N/A | N/A |
| 10488031 | ---                                                    | N/A | N/A |
| 10488033 | Pak7                                                   | N/A | N/A |
| 10488046 | ---                                                    | N/A | N/A |
| 10488048 | Mkks /// 2210009G21Rik                                 | N/A | N/A |
| 10488090 | Tasp1                                                  | N/A | N/A |
| 10488106 | ---                                                    | N/A | N/A |
| 10488108 | Esf1                                                   | N/A | N/A |
| 10488145 | ---                                                    | N/A | N/A |
| 10488154 | ---                                                    | N/A | N/A |
| 10488195 | Rrbp1                                                  | N/A | N/A |
| 10488231 | Rps2 /// Rps2-ps6 /// Gm5921 /// Gm6139                | N/A | N/A |
| 10488233 | ---                                                    | N/A | N/A |
| 10488254 | ---                                                    | N/A | N/A |
| 10488264 | Calcoco2                                               | N/A | N/A |
| 10488266 | 6330439K17Rik                                          | N/A | N/A |
| 10488291 | Rbbp9                                                  | N/A | N/A |
| 10488299 | Gm14092                                                | N/A | N/A |
| 10488303 | Crnk1l                                                 | N/A | N/A |
| 10488322 | Ralgapa2                                               | N/A | N/A |
| 10488366 | Nkx2-2                                                 | N/A | N/A |
| 10488372 | ---                                                    | N/A | N/A |
| 10488378 | Thbd                                                   | N/A | N/A |
| 10488382 | Cd93                                                   | N/A | N/A |
| 10488387 | Napb                                                   | N/A | N/A |
| 10488415 | Cst3                                                   | N/A | N/A |
| 10488430 | Gm10750                                                | N/A | N/A |
| 10488437 | C530025M09Rik                                          | N/A | N/A |
| 10488439 | ---                                                    | N/A | N/A |
| 10488449 | ---                                                    | N/A | N/A |
| 10488451 | 3300002I08Rik                                          | N/A | N/A |
| 10488456 | ---                                                    | N/A | N/A |
| 10488469 | Btbd1                                                  | N/A | N/A |
| 10488472 | 2310001A20Rik                                          | N/A | N/A |
| 10488482 | Acsc1                                                  | N/A | N/A |
| 10488507 | Abhd12                                                 | N/A | N/A |
| 10488565 | Gm14160                                                | N/A | N/A |
| 10488575 | Psmf1                                                  | N/A | N/A |
| 10488594 | Rbck1                                                  | N/A | N/A |
| 10488617 | Nrsn2 /// Gm14164                                      | N/A | N/A |
| 10488623 | Sox12                                                  | N/A | N/A |
| 10488626 | Zcchc3                                                 | N/A | N/A |

|          |                          |     |     |
|----------|--------------------------|-----|-----|
| 10488630 | Defb23                   | N/A | N/A |
| 10488652 | Defb25                   | N/A | N/A |
| 10488673 | Foxs1                    | N/A | N/A |
| 10488687 | Pdrg1                    | N/A | N/A |
| 10488693 | Tspyl3                   | N/A | N/A |
| 10488697 | Plagl2                   | N/A | N/A |
| 10488709 | 8430427H17Rik            | N/A | N/A |
| 10488722 | Commnd7                  | N/A | N/A |
| 10488748 | Cdk5rap1                 | N/A | N/A |
| 10488762 | Snta1                    | N/A | N/A |
| 10488771 | Necab3                   | N/A | N/A |
| 10488797 | Pxmp4                    | N/A | N/A |
| 10488802 | Zfp341                   | N/A | N/A |
| 10488816 | Ahcy                     | N/A | N/A |
| 10488830 | Pigu                     | N/A | N/A |
| 10488844 | Ncoa6                    | N/A | N/A |
| 10488860 | ---                      | N/A | N/A |
| 10488862 | Ggt7                     | N/A | N/A |
| 10488879 | Gss                      | N/A | N/A |
| 10488892 | Trpc4ap                  | N/A | N/A |
| 10488912 | Edem2                    | N/A | N/A |
| 10488944 | Uqcc                     | N/A | N/A |
| 10488959 | 6430550D23Rik            | N/A | N/A |
| 10488982 | Rbm12 /// Cpne1 /// Nfs1 | N/A | N/A |
| 10489004 | Nfs1                     | N/A | N/A |
| 10489018 | Rbm39                    | N/A | N/A |
| 10489038 | Scand1                   | N/A | N/A |
| 10489041 | Pdcd10                   | N/A | N/A |
| 10489043 | 2900097C17Rik /// Gm7292 | N/A | N/A |
| 10489049 | Rpl9 /// Gm5451          | N/A | N/A |
| 10489051 | 5730471H19Rik            | N/A | N/A |
| 10489053 | 4930518I15Rik            | N/A | N/A |
| 10489065 | Ndr3                     | N/A | N/A |
| 10489092 | 9830001H06Rik            | N/A | N/A |
| 10489186 | Rpl35a                   | N/A | N/A |
| 10489195 | Tti1                     | N/A | N/A |
| 10489204 | Tgm2                     | N/A | N/A |
| 10489235 | 9430008C03Rik            | N/A | N/A |
| 10489237 | ---                      | N/A | N/A |
| 10489239 | ---                      | N/A | N/A |
| 10489246 | Mafb                     | N/A | N/A |
| 10489253 | Zhx3                     | N/A | N/A |
| 10489303 | ---                      | N/A | N/A |
| 10489305 | Ptprt                    | N/A | N/A |
| 10489341 | ---                      | N/A | N/A |
| 10489346 | ---                      | N/A | N/A |
| 10489355 | Jph2                     | N/A | N/A |
| 10489364 | 3230401D17Rik            | N/A | N/A |
| 10489368 | Fitm2 /// 2310001K24Rik  | N/A | N/A |
| 10489372 | 0610008F07Rik            | N/A | N/A |
| 10489377 | Serinc3                  | N/A | N/A |
| 10489406 | Rims4                    | N/A | N/A |
| 10489413 | Tomm34                   | N/A | N/A |
| 10489440 | Wfdc15a                  | N/A | N/A |
| 10489484 | Sdc4                     | N/A | N/A |
| 10489498 | Dbndd2 /// Gm10725       | N/A | N/A |
| 10489532 | Wfdc11                   | N/A | N/A |
| 10489542 | Wfdc3                    | N/A | N/A |
| 10489553 | Acot8                    | N/A | N/A |
| 10489566 | Ctsa /// Neurl2          | N/A | N/A |
| 10489569 | Pltp /// Ctsa            | N/A | N/A |
| 10489589 | Pcif1 /// 4930445K14Rik  | N/A | N/A |
| 10489620 | Ncoa5                    | N/A | N/A |
| 10489629 | Cdh22                    | N/A | N/A |
| 10489660 | Elmo2                    | N/A | N/A |
| 10489694 | Zfp334                   | N/A | N/A |
| 10489701 | 4833422F24Rik            | N/A | N/A |
| 10489705 | Slc13a3                  | N/A | N/A |
| 10489719 | 2810408M09Rik            | N/A | N/A |
| 10489721 | LOC280487                | N/A | N/A |
| 10489723 | Zmynd8                   | N/A | N/A |
| 10489759 | Sulf2                    | N/A | N/A |
| 10489782 | ---                      | N/A | N/A |
| 10489784 | Prex1                    | N/A | N/A |
| 10489829 | ---                      | N/A | N/A |
| 10489831 | Stau1                    | N/A | N/A |
| 10489870 | ---                      | N/A | N/A |
| 10489872 | Kcnb1                    | N/A | N/A |
| 10489891 | B4galt5                  | N/A | N/A |
| 10489904 | Spta2                    | N/A | N/A |
| 10489912 | Tmem189                  | N/A | N/A |
| 10489936 | Adnp /// Dpm1            | N/A | N/A |
| 10489946 | Dpm1 /// Adnp            | N/A | N/A |
| 10489983 | Gm10724                  | N/A | N/A |

|          |                                                                                                 |     |     |
|----------|-------------------------------------------------------------------------------------------------|-----|-----|
| 10489985 | Atp9a                                                                                           | N/A | N/A |
| 10490045 | ---                                                                                             | N/A | N/A |
| 10490053 | Zfp217                                                                                          | N/A | N/A |
| 10490078 | Sumo1                                                                                           | N/A | N/A |
| 10490097 | Cbln4                                                                                           | N/A | N/A |
| 10490126 | Rps29                                                                                           | N/A | N/A |
| 10490129 | Bmp7                                                                                            | N/A | N/A |
| 10490150 | Zbp1                                                                                            | N/A | N/A |
| 10490159 | Pmepa1                                                                                          | N/A | N/A |
| 10490169 | Ppp4r1l-ps                                                                                      | N/A | N/A |
| 10490192 | ---                                                                                             | N/A | N/A |
| 10490194 | ---                                                                                             | N/A | N/A |
| 10490199 | Mir296                                                                                          | N/A | N/A |
| 10490201 | Mir298                                                                                          | N/A | N/A |
| 10490203 | Gnas                                                                                            | N/A | N/A |
| 10490212 | Ctsz                                                                                            | N/A | N/A |
| 10490221 | Atp5e                                                                                           | N/A | N/A |
| 10490225 | Simo2                                                                                           | N/A | N/A |
| 10490244 | Gm2049                                                                                          | N/A | N/A |
| 10490246 | Gm14326 /// Gm14399                                                                             | N/A | N/A |
| 10490248 | ---                                                                                             | N/A | N/A |
| 10490250 | Gm6710 /// LOC627901 /// 0610010B08Rik /// Gm14295 /// Gm14391 /// Gm14399                      | N/A | N/A |
| 10490256 | Rps8 /// Gm11353 /// Rps8-ps1                                                                   | N/A | N/A |
| 10490259 | 100043387 /// 0610010B08Rik                                                                     | N/A | N/A |
| 10490262 | 0610010B08Rik /// Gm14430                                                                       | N/A | N/A |
| 10490265 | 0610010B08Rik /// LOC66376 /// Gm2004                                                           | N/A | N/A |
| 10490268 | 0610010B08Rik                                                                                   | N/A | N/A |
| 10490271 | Gm2049                                                                                          | N/A | N/A |
| 10490273 | 100043387 /// 0610010B08Rik                                                                     | N/A | N/A |
| 10490276 | Gm14322                                                                                         | N/A | N/A |
| 10490287 | Gm14407                                                                                         | N/A | N/A |
| 10490289 | ---                                                                                             | N/A | N/A |
| 10490291 | 0610010B08Rik                                                                                   | N/A | N/A |
| 10490294 | 2810021G02Rik /// Gm14430 /// Gm6710 /// Gm14326 /// Gm14403 /// Gm14434 /// Gm14391 /// Etohi1 | N/A | N/A |
| 10490350 | Ppp1r3d                                                                                         | N/A | N/A |
| 10490352 | Taf4a                                                                                           | N/A | N/A |
| 10490370 | Psma7                                                                                           | N/A | N/A |
| 10490378 | Hrh3                                                                                            | N/A | N/A |
| 10490467 | Cables2                                                                                         | N/A | N/A |
| 10490544 | Ythdf1                                                                                          | N/A | N/A |
| 10490551 | Nkain4                                                                                          | N/A | N/A |
| 10490559 | Chrna4                                                                                          | N/A | N/A |
| 10490569 | Kcnq2                                                                                           | N/A | N/A |
| 10490602 | Eef1a2                                                                                          | N/A | N/A |
| 10490632 | BC006779                                                                                        | N/A | N/A |
| 10490653 | Gmeb2                                                                                           | N/A | N/A |
| 10490663 | Stmn3                                                                                           | N/A | N/A |
| 10490665 | Stmn3                                                                                           | N/A | N/A |
| 10490672 | Arfrp1                                                                                          | N/A | N/A |
| 10490706 | Znf512b                                                                                         | N/A | N/A |
| 10490724 | Samd10                                                                                          | N/A | N/A |
| 10490731 | Sox18                                                                                           | N/A | N/A |
| 10490734 | ---                                                                                             | N/A | N/A |
| 10490736 | Rgs19                                                                                           | N/A | N/A |
| 10490751 | ---                                                                                             | N/A | N/A |
| 10490768 | Rps24-ps2                                                                                       | N/A | N/A |
| 10490773 | Hnrnp2                                                                                          | N/A | N/A |
| 10490775 | Gm10748                                                                                         | N/A | N/A |
| 10490777 | Zfx4                                                                                            | N/A | N/A |
| 10490794 | Pkia                                                                                            | N/A | N/A |
| 10490813 | ---                                                                                             | N/A | N/A |
| 10490818 | Stmn2                                                                                           | N/A | N/A |
| 10490824 | Rpl29                                                                                           | N/A | N/A |
| 10490826 | Zbtb10                                                                                          | N/A | N/A |
| 10490833 | ---                                                                                             | N/A | N/A |
| 10490838 | Fabp5 /// Fabp5l2                                                                               | N/A | N/A |
| 10490845 | Chmp4c                                                                                          | N/A | N/A |
| 10490852 | ---                                                                                             | N/A | N/A |
| 10490854 | Gm13051 /// Zfp534 /// Gm13151 /// Gm13235                                                      | N/A | N/A |
| 10490856 | Raly1                                                                                           | N/A | N/A |
| 10490872 | Lrrcc1                                                                                          | N/A | N/A |
| 10490894 | E2f5                                                                                            | N/A | N/A |
| 10490913 | Car3                                                                                            | N/A | N/A |
| 10490923 | Car2                                                                                            | N/A | N/A |
| 10490931 | Ythdf3                                                                                          | N/A | N/A |
| 10490942 | Mir124a-2                                                                                       | N/A | N/A |
| 10490944 | Cypt12                                                                                          | N/A | N/A |
| 10490946 | Hsp90aa1                                                                                        | N/A | N/A |
| 10490953 | ---                                                                                             | N/A | N/A |
| 10490955 | Mtfr1                                                                                           | N/A | N/A |
| 10490982 | BC002189                                                                                        | N/A | N/A |
| 10490984 | ---                                                                                             | N/A | N/A |
| 10490986 | 4632415L05Rik                                                                                   | N/A | N/A |
| 10490989 | Cp                                                                                              | N/A | N/A |

|          |                                             |     |     |
|----------|---------------------------------------------|-----|-----|
| 10491036 | Nudt21                                      | N/A | N/A |
| 10491038 | Tbl1xr1                                     | N/A | N/A |
| 10491056 | Tbl1xr1                                     | N/A | N/A |
| 10491060 | ---                                         | N/A | N/A |
| 10491062 | Rpl27a /// Gm5908 /// Rpl27a-ps1 /// Gm5453 | N/A | N/A |
| 10491064 | ---                                         | N/A | N/A |
| 10491066 | Nlgn1 /// A830092H15Rik                     | N/A | N/A |
| 10491081 | ---                                         | N/A | N/A |
| 10491083 | Nceh1                                       | N/A | N/A |
| 10491091 | Tnfsf10                                     | N/A | N/A |
| 10491136 | Tnik                                        | N/A | N/A |
| 10491171 | Slc2a2                                      | N/A | N/A |
| 10491182 | Elf5a2                                      | N/A | N/A |
| 10491191 | Rpl221l /// LOC100042049                    | N/A | N/A |
| 10491212 | Egfem1                                      | N/A | N/A |
| 10491229 | Mir551b                                     | N/A | N/A |
| 10491231 | Mynn                                        | N/A | N/A |
| 10491261 | Sec62                                       | N/A | N/A |
| 10491279 | Prkci                                       | N/A | N/A |
| 10491300 | Skil                                        | N/A | N/A |
| 10491313 | Cldn11                                      | N/A | N/A |
| 10491319 | Kcnmb2                                      | N/A | N/A |
| 10491329 | Zmat3 /// 4930429B21Rik                     | N/A | N/A |
| 10491331 | Pik3ca                                      | N/A | N/A |
| 10491354 | Zfp639                                      | N/A | N/A |
| 10491363 | Mfn1                                        | N/A | N/A |
| 10491385 | Actl6a                                      | N/A | N/A |
| 10491406 | Ndufb5                                      | N/A | N/A |
| 10491414 | Usp13                                       | N/A | N/A |
| 10491436 | ---                                         | N/A | N/A |
| 10491438 | Ttc14                                       | N/A | N/A |
| 10491455 | Fxr1 /// Dnajc19                            | N/A | N/A |
| 10491477 | Sox2                                        | N/A | N/A |
| 10491484 | ---                                         | N/A | N/A |
| 10491486 | Atp11b                                      | N/A | N/A |
| 10491518 | ---                                         | N/A | N/A |
| 10491520 | ---                                         | N/A | N/A |
| 10491522 | A330050B17Rik /// Mccc1                     | N/A | N/A |
| 10491526 | Acad9                                       | N/A | N/A |
| 10491547 | 1810062G17Rik                               | N/A | N/A |
| 10491551 | Exosc9                                      | N/A | N/A |
| 10491595 | 4932438A13Rik                               | N/A | N/A |
| 10491597 | 4932438A13Rik                               | N/A | N/A |
| 10491599 | 4932438A13Rik                               | N/A | N/A |
| 10491603 | 4932438A13Rik                               | N/A | N/A |
| 10491605 | 4932438A13Rik                               | N/A | N/A |
| 10491615 | 4932438A13Rik                               | N/A | N/A |
| 10491617 | 4932438A13Rik                               | N/A | N/A |
| 10491619 | 4932438A13Rik                               | N/A | N/A |
| 10491623 | 4932438A13Rik                               | N/A | N/A |
| 10491695 | Bbs12                                       | N/A | N/A |
| 10491704 | Spata5                                      | N/A | N/A |
| 10491730 | Rps23 /// Gm8618                            | N/A | N/A |
| 10491732 | Fat4                                        | N/A | N/A |
| 10491751 | ---                                         | N/A | N/A |
| 10491753 | Intu                                        | N/A | N/A |
| 10491780 | Hspa4l                                      | N/A | N/A |
| 10491825 | 3110057012Rik                               | N/A | N/A |
| 10491835 | Larp1b                                      | N/A | N/A |
| 10491846 | ---                                         | N/A | N/A |
| 10491858 | ---                                         | N/A | N/A |
| 10491877 | D3Erttd751e                                 | N/A | N/A |
| 10491883 | Acp1                                        | N/A | N/A |
| 10491885 | Pcdh10                                      | N/A | N/A |
| 10491897 | ---                                         | N/A | N/A |
| 10491920 | Elf2                                        | N/A | N/A |
| 10491922 | Naa15                                       | N/A | N/A |
| 10491958 | Gm10729                                     | N/A | N/A |
| 10491960 | ---                                         | N/A | N/A |
| 10491962 | Foxo1                                       | N/A | N/A |
| 10491967 | Gapdh /// Gm4609 /// Gm10293                | N/A | N/A |
| 10491993 | Stoml3                                      | N/A | N/A |
| 10492002 | Gm10727                                     | N/A | N/A |
| 10492004 | ---                                         | N/A | N/A |
| 10492006 | Trpc4                                       | N/A | N/A |
| 10492045 | Hnrnpa3                                     | N/A | N/A |
| 10492091 | Smad9                                       | N/A | N/A |
| 10492102 | Spg20                                       | N/A | N/A |
| 10492136 | Dcl1                                        | N/A | N/A |
| 10492165 | ---                                         | N/A | N/A |
| 10492169 | Mab21l1                                     | N/A | N/A |
| 10492172 | ---                                         | N/A | N/A |
| 10492174 | Tm4sf4                                      | N/A | N/A |
| 10492180 | Rnf13                                       | N/A | N/A |

|          |                                                                |     |     |
|----------|----------------------------------------------------------------|-----|-----|
| 10492193 | ---                                                            | N/A | N/A |
| 10492195 | Tsc22d2                                                        | N/A | N/A |
| 10492205 | Eif2a                                                          | N/A | N/A |
| 10492220 | 2810407C02Rik                                                  | N/A | N/A |
| 10492231 | Med12l                                                         | N/A | N/A |
| 10492300 | Aadac                                                          | N/A | N/A |
| 10492310 | Mbnl1                                                          | N/A | N/A |
| 10492325 | Ube2v1                                                         | N/A | N/A |
| 10492330 | P2ry1                                                          | N/A | N/A |
| 10492335 | Rap2b                                                          | N/A | N/A |
| 10492341 | 4631416L12Rik                                                  | N/A | N/A |
| 10492355 | Mme                                                            | N/A | N/A |
| 10492381 | Gmps                                                           | N/A | N/A |
| 10492396 | Vmn2r1                                                         | N/A | N/A |
| 10492424 | ---                                                            | N/A | N/A |
| 10492426 | Acsf2                                                          | N/A | N/A |
| 10492428 | Tiparp /// 4931440P22Rik                                       | N/A | N/A |
| 10492442 | Lekr1                                                          | N/A | N/A |
| 10492452 | ---                                                            | N/A | N/A |
| 10492454 | ---                                                            | N/A | N/A |
| 10492456 | Rsrc1                                                          | N/A | N/A |
| 10492480 | Gfm1                                                           | N/A | N/A |
| 10492499 | Mfsd1                                                          | N/A | N/A |
| 10492516 | lqcj-schip1 /// lqcj                                           | N/A | N/A |
| 10492522 | Schip1 /// lqcj-schip1                                         | N/A | N/A |
| 10492536 | ---                                                            | N/A | N/A |
| 10492538 | Gm10723                                                        | N/A | N/A |
| 10492556 | 1110032F04Rik                                                  | N/A | N/A |
| 10492582 | Mir15b                                                         | N/A | N/A |
| 10492584 | Mir16-2                                                        | N/A | N/A |
| 10492590 | Ppm1l                                                          | N/A | N/A |
| 10492598 | Nmd3                                                           | N/A | N/A |
| 10492625 | ---                                                            | N/A | N/A |
| 10492628 | Serpini1                                                       | N/A | N/A |
| 10492640 | Fstl5                                                          | N/A | N/A |
| 10492658 | Gapdh /// Gm2606 /// Gm4609 /// Gm2451 /// Gm10290 /// Gm10291 | N/A | N/A |
| 10492660 | ---                                                            | N/A | N/A |
| 10492668 | 4930589L23Rik                                                  | N/A | N/A |
| 10492671 | Ppid                                                           | N/A | N/A |
| 10492679 | 4930579G24Rik                                                  | N/A | N/A |
| 10492699 | Ctso                                                           | N/A | N/A |
| 10492709 | Accn5                                                          | N/A | N/A |
| 10492720 | Mtap9                                                          | N/A | N/A |
| 10492735 | Fgg                                                            | N/A | N/A |
| 10492748 | Fga                                                            | N/A | N/A |
| 10492755 | Fga                                                            | N/A | N/A |
| 10492757 | Plrg1                                                          | N/A | N/A |
| 10492774 | Dchs2                                                          | N/A | N/A |
| 10492813 | Tigd4                                                          | N/A | N/A |
| 10492824 | ---                                                            | N/A | N/A |
| 10492846 | Pet112l                                                        | N/A | N/A |
| 10492860 | Higd1a                                                         | N/A | N/A |
| 10492864 | Sh3d19                                                         | N/A | N/A |
| 10492888 | ---                                                            | N/A | N/A |
| 10492890 | Lrba                                                           | N/A | N/A |
| 10492951 | ---                                                            | N/A | N/A |
| 10492953 | ---                                                            | N/A | N/A |
| 10492955 | ---                                                            | N/A | N/A |
| 10492964 | Cd5l                                                           | N/A | N/A |
| 10492997 | Etv3                                                           | N/A | N/A |
| 10493009 | Arhgef11 /// 4933430H15Rik                                     | N/A | N/A |
| 10493086 | Hdgf                                                           | N/A | N/A |
| 10493094 | Mrp124                                                         | N/A | N/A |
| 10493103 | lsg20l2                                                        | N/A | N/A |
| 10493120 | Gpatch4                                                        | N/A | N/A |
| 10493177 | Mef2d                                                          | N/A | N/A |
| 10493189 | Mef2d                                                          | N/A | N/A |
| 10493191 | Mir9-1                                                         | N/A | N/A |
| 10493193 | Cct3                                                           | N/A | N/A |
| 10493203 | 0610031J06Rik                                                  | N/A | N/A |
| 10493210 | Smg5                                                           | N/A | N/A |
| 10493235 | Paqr6                                                          | N/A | N/A |
| 10493243 | Rpl21                                                          | N/A | N/A |
| 10493247 | Ubqln4                                                         | N/A | N/A |
| 10493259 | Ssr2                                                           | N/A | N/A |
| 10493267 | Arhgef2                                                        | N/A | N/A |
| 10493292 | 2810403A07Rik                                                  | N/A | N/A |
| 10493307 | ---                                                            | N/A | N/A |
| 10493309 | Rit1                                                           | N/A | N/A |
| 10493317 | Gon4l                                                          | N/A | N/A |
| 10493335 | 583041710Rik /// Gon4l                                         | N/A | N/A |
| 10493343 | ---                                                            | N/A | N/A |
| 10493345 | ---                                                            | N/A | N/A |
| 10493347 | Ash1l                                                          | N/A | N/A |



|          |                                                                                                  |     |     |
|----------|--------------------------------------------------------------------------------------------------|-----|-----|
| 10493377 | ---                                                                                              | N/A | N/A |
| 10493380 | ---                                                                                              | N/A | N/A |
| 10493394 | Clk2                                                                                             | N/A | N/A |
| 10493409 | Scamp3                                                                                           | N/A | N/A |
| 10493421 | Fam189b                                                                                          | N/A | N/A |
| 10493435 | Gba                                                                                              | N/A | N/A |
| 10493484 | Krtcap2                                                                                          | N/A | N/A |
| 10493490 | Dpm3                                                                                             | N/A | N/A |
| 10493494 | Efna3                                                                                            | N/A | N/A |
| 10493496 | Adam15                                                                                           | N/A | N/A |
| 10493498 | Dcst1                                                                                            | N/A | N/A |
| 10493519 | Shc1                                                                                             | N/A | N/A |
| 10493530 | Pygo2                                                                                            | N/A | N/A |
| 10493555 | Kcnn3                                                                                            | N/A | N/A |
| 10493565 | Adar                                                                                             | N/A | N/A |
| 10493585 | Ube2q1                                                                                           | N/A | N/A |
| 10493604 | She                                                                                              | N/A | N/A |
| 10493612 | 4933434E20Rik /// 1700094D03Rik                                                                  | N/A | N/A |
| 10493626 | 1700094D03Rik /// 4933434E20Rik                                                                  | N/A | N/A |
| 10493631 | Mir190b                                                                                          | N/A | N/A |
| 10493660 | Nup210l                                                                                          | N/A | N/A |
| 10493662 | Nup210l                                                                                          | N/A | N/A |
| 10493664 | Nup210l                                                                                          | N/A | N/A |
| 10493666 | Nup210l                                                                                          | N/A | N/A |
| 10493668 | Nup210l                                                                                          | N/A | N/A |
| 10493688 | Nup210l                                                                                          | N/A | N/A |
| 10493690 | Nup210l                                                                                          | N/A | N/A |
| 10493703 | Jtb                                                                                              | N/A | N/A |
| 10493709 | Slc39a1                                                                                          | N/A | N/A |
| 10493711 | Crtc2                                                                                            | N/A | N/A |
| 10493758 | Gatad2b                                                                                          | N/A | N/A |
| 10493789 | S100a13                                                                                          | N/A | N/A |
| 10493798 | S100a16                                                                                          | N/A | N/A |
| 10493809 | S100a2                                                                                           | N/A | N/A |
| 10493812 | S100a4                                                                                           | N/A | N/A |
| 10493856 | Sprr2a3 /// Sprr2a1                                                                              | N/A | N/A |
| 10493858 | Sprr2a3 /// Sprr2a1                                                                              | N/A | N/A |
| 10493889 | Lce1c                                                                                            | N/A | N/A |
| 10493891 | Ywhaz                                                                                            | N/A | N/A |
| 10493894 | ---                                                                                              | N/A | N/A |
| 10493900 | Lce3c                                                                                            | N/A | N/A |
| 10493903 | Lce3c /// Lce3b /// Lce3f /// Lce3a                                                              | N/A | N/A |
| 10493984 | Tchh                                                                                             | N/A | N/A |
| 10493990 | S100a11                                                                                          | N/A | N/A |
| 10493999 | Tdpoz2 /// Gm5773                                                                                | N/A | N/A |
| 10494001 | Tdpoz4 /// Gm4858                                                                                | N/A | N/A |
| 10494003 | Tdpoz3                                                                                           | N/A | N/A |
| 10494005 | Gm10696                                                                                          | N/A | N/A |
| 10494023 | Rorc                                                                                             | N/A | N/A |
| 10494039 | Lingo4                                                                                           | N/A | N/A |
| 10494043 | Tdrkh                                                                                            | N/A | N/A |
| 10494060 | Mrpl9                                                                                            | N/A | N/A |
| 10494069 | Celf3                                                                                            | N/A | N/A |
| 10494085 | Selenbp2                                                                                         | N/A | N/A |
| 10494092 | Pogz                                                                                             | N/A | N/A |
| 10494114 | Selenbp1 /// Selenbp2                                                                            | N/A | N/A |
| 10494122 | Rfx5                                                                                             | N/A | N/A |
| 10494137 | Pi4kb                                                                                            | N/A | N/A |
| 10494151 | ---                                                                                              | N/A | N/A |
| 10494153 | Vps72                                                                                            | N/A | N/A |
| 10494170 | Lysmd1                                                                                           | N/A | N/A |
| 10494200 | Cdc42se1                                                                                         | N/A | N/A |
| 10494227 | Lass2                                                                                            | N/A | N/A |
| 10494238 | Arnt                                                                                             | N/A | N/A |
| 10494288 | Golph3l                                                                                          | N/A | N/A |
| 10494296 | Rps10                                                                                            | N/A | N/A |
| 10494299 | Ensa                                                                                             | N/A | N/A |
| 10494306 | Mcl1                                                                                             | N/A | N/A |
| 10494312 | Aph1a /// Car14                                                                                  | N/A | N/A |
| 10494322 | Anp32e                                                                                           | N/A | N/A |
| 10494332 | ---                                                                                              | N/A | N/A |
| 10494335 | Otud7b                                                                                           | N/A | N/A |
| 10494351 | Mtmr11                                                                                           | N/A | N/A |
| 10494372 | Sv2a                                                                                             | N/A | N/A |
| 10494386 | Hist2h2ab                                                                                        | N/A | N/A |
| 10494388 | Hist2h2be                                                                                        | N/A | N/A |
| 10494390 | Hist2h2aa1 /// Hist2h2aa2 /// Hist2h3c1 /// Hist2h2ac                                            | N/A | N/A |
| 10494395 | Hist2h2aa1 /// Hist2h2aa2 /// Hist2h3b /// Hist2h3c2-ps /// Hist2h3c1 /// Hist1h3b /// Hist2h2ac | N/A | N/A |
| 10494402 | Hist2h3b /// Hist2h3c2-ps /// Hist2h3c1 /// Hist1h3b                                             | N/A | N/A |
| 10494405 | Hist2h3c2-ps /// Hist2h3b /// Hist2h3c1 /// Hist1h3b                                             | N/A | N/A |
| 10494407 | Hist2h2bb                                                                                        | N/A | N/A |
| 10494411 | Rnu1b1 /// Rnu1b6 /// Rnu1b2                                                                     | N/A | N/A |
| 10494413 | Rnu1b1 /// Rnu1b6 /// Rnu1b2                                                                     | N/A | N/A |
| 10494415 | ---                                                                                              | N/A | N/A |

|          |                              |     |     |
|----------|------------------------------|-----|-----|
| 10494417 | Rnu1b1 /// Rnu1b6 /// Rnu1b2 | N/A | N/A |
| 10494421 | Rnu1b1 /// Rnu1b6 /// Rnu1b2 | N/A | N/A |
| 10494423 | Hfe2                         | N/A | N/A |
| 10494428 | Txnip                        | N/A | N/A |
| 10494441 | Ankrd34a                     | N/A | N/A |
| 10494445 | Lix1l                        | N/A | N/A |
| 10494452 | Rbm8a                        | N/A | N/A |
| 10494460 | Pex11b                       | N/A | N/A |
| 10494509 | Pias3                        | N/A | N/A |
| 10494527 | Rnf115                       | N/A | N/A |
| 10494536 | Pdzk1 /// Gpr89              | N/A | N/A |
| 10494548 | Gja5                         | N/A | N/A |
| 10494551 | Acp6                         | N/A | N/A |
| 10494565 | Fmo5                         | N/A | N/A |
| 10494574 | Prkab2                       | N/A | N/A |
| 10494595 | Notch2                       | N/A | N/A |
| 10494643 | Hmgcs2                       | N/A | N/A |
| 10494655 | Zfp697                       | N/A | N/A |
| 10494662 | Ywhah                        | N/A | N/A |
| 10494664 | Wars2                        | N/A | N/A |
| 10494735 | Gdap2                        | N/A | N/A |
| 10494751 | ---                          | N/A | N/A |
| 10494753 | ---                          | N/A | N/A |
| 10494769 | Trim45                       | N/A | N/A |
| 10494781 | Igsf3                        | N/A | N/A |
| 10494817 | Ngf                          | N/A | N/A |
| 10494821 | Tspan2                       | N/A | N/A |
| 10494832 | Sike1                        | N/A | N/A |
| 10494839 | Csde1                        | N/A | N/A |
| 10494910 | Bcas2                        | N/A | N/A |
| 10494924 | Trim33                       | N/A | N/A |
| 10494957 | Ap4b1                        | N/A | N/A |
| 10495001 | Rsb1                         | N/A | N/A |
| 10495012 | Phtf1                        | N/A | N/A |
| 10495059 | St7l                         | N/A | N/A |
| 10495083 | Kcnd3                        | N/A | N/A |
| 10495094 | 6530418L21Rik                | N/A | N/A |
| 10495107 | Adora3                       | N/A | N/A |
| 10495111 | Wdr77                        | N/A | N/A |
| 10495120 | Ovgp1                        | N/A | N/A |
| 10495134 | ---                          | N/A | N/A |
| 10495147 | Dennd2d /// 2010016i18Rik    | N/A | N/A |
| 10495163 | Dram2                        | N/A | N/A |
| 10495173 | 4933421E11Rik                | N/A | N/A |
| 10495183 | Kcna3                        | N/A | N/A |
| 10495186 | A1504432                     | N/A | N/A |
| 10495193 | Kcna2                        | N/A | N/A |
| 10495197 | Gm10672                      | N/A | N/A |
| 10495199 | Kcna10                       | N/A | N/A |
| 10495243 | Gstm5 /// 4933431E20Rik      | N/A | N/A |
| 10495252 | Romo1                        | N/A | N/A |
| 10495257 | Ampd2 /// Gm12500            | N/A | N/A |
| 10495270 | Amigo1                       | N/A | N/A |
| 10495285 | Sort1                        | N/A | N/A |
| 10495330 | ---                          | N/A | N/A |
| 10495332 | 1700013F07Rik                | N/A | N/A |
| 10495340 | Taf13                        | N/A | N/A |
| 10495343 | Wdr47                        | N/A | N/A |
| 10495359 | Clcc1                        | N/A | N/A |
| 10495405 | Slc25a24                     | N/A | N/A |
| 10495518 | Olfm3                        | N/A | N/A |
| 10495528 | Gm9889                       | N/A | N/A |
| 10495530 | Dph5                         | N/A | N/A |
| 10495549 | Dbt                          | N/A | N/A |
| 10495574 | Sass6 /// Ccdc76             | N/A | N/A |
| 10495592 | ---                          | N/A | N/A |
| 10495594 | ---                          | N/A | N/A |
| 10495596 | Frrs1                        | N/A | N/A |
| 10495613 | 4833424O15Rik                | N/A | N/A |
| 10495621 | Mir137                       | N/A | N/A |
| 10495623 | Gm9916                       | N/A | N/A |
| 10495625 | Dpyd                         | N/A | N/A |
| 10495649 | Gm10652                      | N/A | N/A |
| 10495651 | Alg14                        | N/A | N/A |
| 10495657 | Alg14                        | N/A | N/A |
| 10495659 | Cnn3                         | N/A | N/A |
| 10495675 | F3                           | N/A | N/A |
| 10495763 | Gclm                         | N/A | N/A |
| 10495773 | Dnttip2                      | N/A | N/A |
| 10495781 | Bcar3                        | N/A | N/A |
| 10495820 | Fabp2                        | N/A | N/A |
| 10495830 | Sec24d                       | N/A | N/A |
| 10495867 | Gm9372                       | N/A | N/A |
| 10495869 | Tram111                      | N/A | N/A |

|          |                                                                           |     |     |
|----------|---------------------------------------------------------------------------|-----|-----|
| 10495876 | ---                                                                       | N/A | N/A |
| 10495878 | Ndst4                                                                     | N/A | N/A |
| 10495891 | Arsj                                                                      | N/A | N/A |
| 10495896 | Camk2d                                                                    | N/A | N/A |
| 10495929 | Mir302d                                                                   | N/A | N/A |
| 10495933 | 4930422G04Rik                                                             | N/A | N/A |
| 10495935 | 4930422G04Rik                                                             | N/A | N/A |
| 10495964 | Neurog2                                                                   | N/A | N/A |
| 10495972 | Gm10650                                                                   | N/A | N/A |
| 10495974 | ---                                                                       | N/A | N/A |
| 10495989 | Rpl7a /// Gm5619 /// Gm16477 /// Rpl7a-ps10                               | N/A | N/A |
| 10495991 | ---                                                                       | N/A | N/A |
| 10496001 | Cfi                                                                       | N/A | N/A |
| 10496077 | Agxt2l1                                                                   | N/A | N/A |
| 10496110 | Papss1                                                                    | N/A | N/A |
| 10496130 | Tbck                                                                      | N/A | N/A |
| 10496159 | Ints12                                                                    | N/A | N/A |
| 10496167 | LOC280487                                                                 | N/A | N/A |
| 10496169 | Ppa2                                                                      | N/A | N/A |
| 10496192 | Tacr3                                                                     | N/A | N/A |
| 10496200 | ---                                                                       | N/A | N/A |
| 10496202 | ---                                                                       | N/A | N/A |
| 10496251 | Bdh2                                                                      | N/A | N/A |
| 10496302 | Manba                                                                     | N/A | N/A |
| 10496322 | Gm9799                                                                    | N/A | N/A |
| 10496324 | Slc39a8                                                                   | N/A | N/A |
| 10496336 | LOC280487                                                                 | N/A | N/A |
| 10496338 | Ppp3ca                                                                    | N/A | N/A |
| 10496357 | ---                                                                       | N/A | N/A |
| 10496359 | Emcn                                                                      | N/A | N/A |
| 10496379 | H2afz                                                                     | N/A | N/A |
| 10496387 | Dnajb14                                                                   | N/A | N/A |
| 10496397 | Mapksp1                                                                   | N/A | N/A |
| 10496417 | Rg9mtd2                                                                   | N/A | N/A |
| 10496425 | Adh7                                                                      | N/A | N/A |
| 10496438 | Adh1                                                                      | N/A | N/A |
| 10496455 | ---                                                                       | N/A | N/A |
| 10496462 | Adh6-ps1                                                                  | N/A | N/A |
| 10496466 | Adh4                                                                      | N/A | N/A |
| 10496475 | Adh5                                                                      | N/A | N/A |
| 10496490 | Mir1956 /// Eif4e                                                         | N/A | N/A |
| 10496494 | Tspan5                                                                    | N/A | N/A |
| 10496519 | Unc5c                                                                     | N/A | N/A |
| 10496569 | Gbp6                                                                      | N/A | N/A |
| 10496605 | Ccb12                                                                     | N/A | N/A |
| 10496626 | Gapdh /// Gm16374 /// Gm2606 /// Gm4609 /// Gm3200 /// Gm2451 /// Gm10293 | N/A | N/A |
| 10496629 | Sep 15                                                                    | N/A | N/A |
| 10496638 | Odf2l                                                                     | N/A | N/A |
| 10496715 | Znhit6                                                                    | N/A | N/A |
| 10496727 | Ddah1                                                                     | N/A | N/A |
| 10496735 | Rpl36a                                                                    | N/A | N/A |
| 10496796 | Ssx2ip                                                                    | N/A | N/A |
| 10496813 | Ctbs /// Spata1                                                           | N/A | N/A |
| 10496822 | Gng5                                                                      | N/A | N/A |
| 10496825 | Uox                                                                       | N/A | N/A |
| 10496835 | Hmgb1                                                                     | N/A | N/A |
| 10496837 | Ttl17                                                                     | N/A | N/A |
| 10496854 | Ttl17                                                                     | N/A | N/A |
| 10496862 | ---                                                                       | N/A | N/A |
| 10496872 | Eitd1                                                                     | N/A | N/A |
| 10496888 | ---                                                                       | N/A | N/A |
| 10496890 | Gipc2                                                                     | N/A | N/A |
| 10496892 | Fubp1                                                                     | N/A | N/A |
| 10496917 | ---                                                                       | N/A | N/A |
| 10496919 | Usp33                                                                     | N/A | N/A |
| 10496956 | Pigk                                                                      | N/A | N/A |
| 10497001 | Cryz                                                                      | N/A | N/A |
| 10497012 | 4922501L14Rik                                                             | N/A | N/A |
| 10497031 | ---                                                                       | N/A | N/A |
| 10497045 | ---                                                                       | N/A | N/A |
| 10497051 | Negr1                                                                     | N/A | N/A |
| 10497064 | ---                                                                       | N/A | N/A |
| 10497066 | Zranb2                                                                    | N/A | N/A |
| 10497077 | Mir186                                                                    | N/A | N/A |
| 10497086 | ---                                                                       | N/A | N/A |
| 10497090 | Ankrd13c                                                                  | N/A | N/A |
| 10497105 | Lrrc40                                                                    | N/A | N/A |
| 10497149 | Wls                                                                       | N/A | N/A |
| 10497167 | ---                                                                       | N/A | N/A |
| 10497169 | ---                                                                       | N/A | N/A |
| 10497173 | Pxmp3                                                                     | N/A | N/A |
| 10497186 | ---                                                                       | N/A | N/A |
| 10497197 | 5330432E05Rik                                                             | N/A | N/A |
| 10497199 | Tmem189 /// Gm6194                                                        | N/A | N/A |

|          |                                                                                                                         |     |     |
|----------|-------------------------------------------------------------------------------------------------------------------------|-----|-----|
| 10497201 | ---                                                                                                                     | N/A | N/A |
| 10497203 | Hey1                                                                                                                    | N/A | N/A |
| 10497222 | Zfp704                                                                                                                  | N/A | N/A |
| 10497237 | Pag1                                                                                                                    | N/A | N/A |
| 10497248 | ---                                                                                                                     | N/A | N/A |
| 10497250 | ---                                                                                                                     | N/A | N/A |
| 10497285 | Impa1                                                                                                                   | N/A | N/A |
| 10497296 | Slc10a5                                                                                                                 | N/A | N/A |
| 10497300 | Zfand1                                                                                                                  | N/A | N/A |
| 10497309 | Snx16                                                                                                                   | N/A | N/A |
| 10497321 | Pgam1                                                                                                                   | N/A | N/A |
| 10497327 | LOC280487                                                                                                               | N/A | N/A |
| 10497335 | 1810022K09Rik                                                                                                           | N/A | N/A |
| 10497337 | Car1                                                                                                                    | N/A | N/A |
| 10497356 | Sirpb1a /// LOC100038947 /// Sirpb1b                                                                                    | N/A | N/A |
| 10497376 | ---                                                                                                                     | N/A | N/A |
| 10497381 | Cyp7b1                                                                                                                  | N/A | N/A |
| 10497390 | Armc1                                                                                                                   | N/A | N/A |
| 10497399 | Pde7a                                                                                                                   | N/A | N/A |
| 10497421 | Hps3                                                                                                                    | N/A | N/A |
| 10497441 | Gyg                                                                                                                     | N/A | N/A |
| 10497481 | 2810416G20Rik                                                                                                           | N/A | N/A |
| 10497483 | Hmgb1                                                                                                                   | N/A | N/A |
| 10497485 | ---                                                                                                                     | N/A | N/A |
| 10497487 | ---                                                                                                                     | N/A | N/A |
| 10497490 | Naaladl2                                                                                                                | N/A | N/A |
| 10497501 | Naaladl2                                                                                                                | N/A | N/A |
| 10497503 | Kpna2                                                                                                                   | N/A | N/A |
| 10497505 | Nlgn1                                                                                                                   | N/A | N/A |
| 10497580 | ---                                                                                                                     | N/A | N/A |
| 10497582 | Tmem212                                                                                                                 | N/A | N/A |
| 10497587 | 1600012F09Rik                                                                                                           | N/A | N/A |
| 10497608 | Mecom                                                                                                                   | N/A | N/A |
| 10497613 | Gm10258                                                                                                                 | N/A | N/A |
| 10497615 | 1600017P15Rik                                                                                                           | N/A | N/A |
| 10497644 | Sec62                                                                                                                   | N/A | N/A |
| 10497646 | Phc3                                                                                                                    | N/A | N/A |
| 10497648 | Phc3                                                                                                                    | N/A | N/A |
| 10497663 | Slc7a14                                                                                                                 | N/A | N/A |
| 10497673 | Zmat3                                                                                                                   | N/A | N/A |
| 10497689 | Gnb4                                                                                                                    | N/A | N/A |
| 10497703 | Mrpl47                                                                                                                  | N/A | N/A |
| 10497711 | Ndufb5 /// Mrpl47                                                                                                       | N/A | N/A |
| 10497713 | Pex5l                                                                                                                   | N/A | N/A |
| 10497731 | Ccdc39 /// Ttc14                                                                                                        | N/A | N/A |
| 10497752 | Carhsp1                                                                                                                 | N/A | N/A |
| 10497754 | Dnajc19                                                                                                                 | N/A | N/A |
| 10497773 | Mccc1                                                                                                                   | N/A | N/A |
| 10497817 | Anxa5                                                                                                                   | N/A | N/A |
| 10497842 | Bbs7                                                                                                                    | N/A | N/A |
| 10497862 | Trpc3                                                                                                                   | N/A | N/A |
| 10497894 | Cetn4                                                                                                                   | N/A | N/A |
| 10497899 | ---                                                                                                                     | N/A | N/A |
| 10497918 | p21 /// Gm6813 /// Gm9104 /// Rpl21-ps4 /// Rpl21-ps7 /// Gm16416 /// Rpl21-ps12 /// Rpl21-ps14 /// Rpl21-ps10 /// Gm80 | N/A | N/A |
| 10497920 | Ankrd50                                                                                                                 | N/A | N/A |
| 10497929 | ---                                                                                                                     | N/A | N/A |
| 10497931 | Cflar                                                                                                                   | N/A | N/A |
| 10497958 | 1700034I23Rik                                                                                                           | N/A | N/A |
| 10497964 | Pgrmc2                                                                                                                  | N/A | N/A |
| 10497968 | Gm16508                                                                                                                 | N/A | N/A |
| 10497971 | Scit1                                                                                                                   | N/A | N/A |
| 10497994 | Pabpc4l                                                                                                                 | N/A | N/A |
| 10497996 | Ikzf5                                                                                                                   | N/A | N/A |
| 10497998 | ---                                                                                                                     | N/A | N/A |
| 10498018 | Pcdh18                                                                                                                  | N/A | N/A |
| 10498038 | Elf2                                                                                                                    | N/A | N/A |
| 10498058 | Ndufc1                                                                                                                  | N/A | N/A |
| 10498064 | Setd7                                                                                                                   | N/A | N/A |
| 10498093 | ---                                                                                                                     | N/A | N/A |
| 10498095 | Cog6                                                                                                                    | N/A | N/A |
| 10498117 | Rpl29                                                                                                                   | N/A | N/A |
| 10498146 | Nhlrc3                                                                                                                  | N/A | N/A |
| 10498158 | Gm10726                                                                                                                 | N/A | N/A |
| 10498160 | Ufm1                                                                                                                    | N/A | N/A |
| 10498166 | ---                                                                                                                     | N/A | N/A |
| 10498168 | Exosc8                                                                                                                  | N/A | N/A |
| 10498180 | Rfxap                                                                                                                   | N/A | N/A |
| 10498185 | Tra2b                                                                                                                   | N/A | N/A |
| 10498187 | 6030405A18Rik                                                                                                           | N/A | N/A |
| 10498210 | Nbea                                                                                                                    | N/A | N/A |
| 10498273 | Tm4sf1                                                                                                                  | N/A | N/A |
| 10498284 | Wwtr1                                                                                                                   | N/A | N/A |
| 10498296 | Commmd2                                                                                                                 | N/A | N/A |
| 10498302 | Gm410                                                                                                                   | N/A | N/A |

|          |                                         |     |     |
|----------|-----------------------------------------|-----|-----|
| 10498307 | ---                                     | N/A | N/A |
| 10498309 | Pfn2                                    | N/A | N/A |
| 10498313 | Pgk1                                    | N/A | N/A |
| 10498319 | Serp1                                   | N/A | N/A |
| 10498332 | Siah2                                   | N/A | N/A |
| 10498343 | ---                                     | N/A | N/A |
| 10498350 | P2ry14                                  | N/A | N/A |
| 10498357 | F630111L10Rik                           | N/A | N/A |
| 10498367 | P2ry13                                  | N/A | N/A |
| 10498379 | Igsf10                                  | N/A | N/A |
| 10498383 | Igsf10                                  | N/A | N/A |
| 10498386 | Igsf10                                  | N/A | N/A |
| 10498401 | ---                                     | N/A | N/A |
| 10498403 | ---                                     | N/A | N/A |
| 10498405 | Gapdh /// Gm12070                       | N/A | N/A |
| 10498413 | 9330121J05Rik                           | N/A | N/A |
| 10498415 | Dhx36                                   | N/A | N/A |
| 10498441 | Gpr149                                  | N/A | N/A |
| 10498446 | ---                                     | N/A | N/A |
| 10498477 | E130311K13Rik                           | N/A | N/A |
| 10498485 | Slc33a1                                 | N/A | N/A |
| 10498519 | Ssr3                                    | N/A | N/A |
| 10498526 | 4931440P22Rik                           | N/A | N/A |
| 10498531 | Ccnl1                                   | N/A | N/A |
| 10498566 | ---                                     | N/A | N/A |
| 10498576 | Lxn                                     | N/A | N/A |
| 10498584 | Rarres1                                 | N/A | N/A |
| 10498591 | ---                                     | N/A | N/A |
| 10498593 | ---                                     | N/A | N/A |
| 10498595 | Snrpd2 /// Gm5449 /// Gm10120           | N/A | N/A |
| 10498597 | 1110032F04Rik                           | N/A | N/A |
| 10498599 | Ift80                                   | N/A | N/A |
| 10498620 | Trim59                                  | N/A | N/A |
| 10498623 | Kpna4                                   | N/A | N/A |
| 10498647 | B3galnt1                                | N/A | N/A |
| 10498651 | Rpl32-ps                                | N/A | N/A |
| 10498653 | 1110032A04Rik                           | N/A | N/A |
| 10498707 | Slitrk3                                 | N/A | N/A |
| 10498710 | Bche                                    | N/A | N/A |
| 10498720 | Zbbx                                    | N/A | N/A |
| 10498763 | Wdr49                                   | N/A | N/A |
| 10498771 | Pdcd10                                  | N/A | N/A |
| 10498795 | Zfp108 /// Zfp114 /// Zfp111 /// Zfp109 | N/A | N/A |
| 10498800 | Ube2d2                                  | N/A | N/A |
| 10498802 | Rapgef2                                 | N/A | N/A |
| 10498827 | Fnip2                                   | N/A | N/A |
| 10498837 | Etfhd                                   | N/A | N/A |
| 10498885 | Gria2                                   | N/A | N/A |
| 10498907 | Glr3                                    | N/A | N/A |
| 10498919 | Gm9989                                  | N/A | N/A |
| 10498921 | Tdo2                                    | N/A | N/A |
| 10498952 | Gucy1a3                                 | N/A | N/A |
| 10498965 | Npy2r                                   | N/A | N/A |
| 10498978 | Lrat                                    | N/A | N/A |
| 10498981 | Fgb                                     | N/A | N/A |
| 10498990 | Gm10710                                 | N/A | N/A |
| 10499045 | Trim2                                   | N/A | N/A |
| 10499080 | Arfp1                                   | N/A | N/A |
| 10499089 | ---                                     | N/A | N/A |
| 10499091 | Fbxw7 /// Dear1                         | N/A | N/A |
| 10499093 | ---                                     | N/A | N/A |
| 10499095 | Fam160a1                                | N/A | N/A |
| 10499121 | Rps3a /// Gm9000 /// Gm10119            | N/A | N/A |
| 10499128 | Rnu73a                                  | N/A | N/A |
| 10499130 | Rnu73b                                  | N/A | N/A |
| 10499138 | Dclk2                                   | N/A | N/A |
| 10499160 | Cd1d1                                   | N/A | N/A |
| 10499187 | Ube2l3 /// Gm10145                      | N/A | N/A |
| 10499198 | Rpl30 /// Gm12191 /// Gm6570 /// Gm6109 | N/A | N/A |
| 10499265 | Prcc                                    | N/A | N/A |
| 10499273 | Mrpl24                                  | N/A | N/A |
| 10499285 | Bcan                                    | N/A | N/A |
| 10499309 | Apoa1bp                                 | N/A | N/A |
| 10499342 | 1700021C14Rik /// Rhbq                  | N/A | N/A |
| 10499358 | Bglap /// Bglap-rs1 /// Bglap2          | N/A | N/A |
| 10499363 | Bglap                                   | N/A | N/A |
| 10499366 | Pmf1                                    | N/A | N/A |
| 10499372 | Slc25a44                                | N/A | N/A |
| 10499425 | 2700060E02Rik                           | N/A | N/A |
| 10499427 | Rxfp4                                   | N/A | N/A |
| 10499429 | Gm10253                                 | N/A | N/A |
| 10499431 | Syt11                                   | N/A | N/A |
| 10499438 | Msto1                                   | N/A | N/A |
| 10499454 | Dap3                                    | N/A | N/A |

|          |                                                       |     |     |
|----------|-------------------------------------------------------|-----|-----|
| 10499470 | Rusc1                                                 | N/A | N/A |
| 10499491 | Mir720                                                | N/A | N/A |
| 10499493 | Hcn3                                                  | N/A | N/A |
| 10499504 | Mtx1                                                  | N/A | N/A |
| 10499512 | Mir92b                                                | N/A | N/A |
| 10499529 | Rag1ap1                                               | N/A | N/A |
| 10499536 | Efna1                                                 | N/A | N/A |
| 10499545 | Efna3                                                 | N/A | N/A |
| 10499560 | Adam15                                                | N/A | N/A |
| 10499620 | Lenep /// Flad1                                       | N/A | N/A |
| 10499639 | Cks1b                                                 | N/A | N/A |
| 10499643 | Chrn2                                                 | N/A | N/A |
| 10499652 | 4632404H12Rik                                         | N/A | N/A |
| 10499655 | Il6ra                                                 | N/A | N/A |
| 10499703 | ---                                                   | N/A | N/A |
| 10499705 | Hax1                                                  | N/A | N/A |
| 10499716 | Ubp2l                                                 | N/A | N/A |
| 10499748 | Rps27 /// Gm9846                                      | N/A | N/A |
| 10499766 | Slc27a3                                               | N/A | N/A |
| 10499777 | Ints3                                                 | N/A | N/A |
| 10499839 | Snapi1 /// Ilf2                                       | N/A | N/A |
| 10499854 | S100a1                                                | N/A | N/A |
| 10499859 | ---                                                   | N/A | N/A |
| 10499861 | S100a9                                                | N/A | N/A |
| 10499870 | Lor                                                   | N/A | N/A |
| 10499876 | Lelp1                                                 | N/A | N/A |
| 10499879 | Rpl3                                                  | N/A | N/A |
| 10499881 | Rpl3                                                  | N/A | N/A |
| 10499883 | Adrm1                                                 | N/A | N/A |
| 10499902 | Spr4                                                  | N/A | N/A |
| 10499904 | Ivl                                                   | N/A | N/A |
| 10499909 | Lce6a                                                 | N/A | N/A |
| 10499927 | Lce1f                                                 | N/A | N/A |
| 10499930 | Lce1g                                                 | N/A | N/A |
| 10499935 | Lce1i                                                 | N/A | N/A |
| 10499937 | ---                                                   | N/A | N/A |
| 10499939 | Lce1k                                                 | N/A | N/A |
| 10499948 | Lce3a                                                 | N/A | N/A |
| 10499950 | ---                                                   | N/A | N/A |
| 10499952 | Crc1                                                  | N/A | N/A |
| 10499961 | Tdpoz2                                                | N/A | N/A |
| 10499967 | ---                                                   | N/A | N/A |
| 10499969 | Gm10696                                               | N/A | N/A |
| 10499971 | Tdpoz1 /// Gm9125                                     | N/A | N/A |
| 10499973 | Gm10697 /// Tdpoz5                                    | N/A | N/A |
| 10499975 | Tdpoz1 /// Gm9125                                     | N/A | N/A |
| 10499977 | Gm10697 /// Tdpoz5                                    | N/A | N/A |
| 10499979 | Gm10696                                               | N/A | N/A |
| 10499996 | Snx27                                                 | N/A | N/A |
| 10500009 | Rpl31 /// Gm16382                                     | N/A | N/A |
| 10500011 | Tuft1                                                 | N/A | N/A |
| 10500034 | Psm4                                                  | N/A | N/A |
| 10500042 | Zfp687                                                | N/A | N/A |
| 10500054 | Psm4                                                  | N/A | N/A |
| 10500069 | Pip5k1a                                               | N/A | N/A |
| 10500089 | ---                                                   | N/A | N/A |
| 10500091 | Scnm1                                                 | N/A | N/A |
| 10500100 | Tnfrsf25                                              | N/A | N/A |
| 10500103 | Gabpb2                                                | N/A | N/A |
| 10500114 | Mllt11                                                | N/A | N/A |
| 10500133 | Prune                                                 | N/A | N/A |
| 10500155 | Gm10691                                               | N/A | N/A |
| 10500157 | Setdb1                                                | N/A | N/A |
| 10500181 | ---                                                   | N/A | N/A |
| 10500204 | Ecm1                                                  | N/A | N/A |
| 10500218 | Tars2                                                 | N/A | N/A |
| 10500237 | Rprd2                                                 | N/A | N/A |
| 10500283 | Aph1a /// Car14                                       | N/A | N/A |
| 10500293 | ---                                                   | N/A | N/A |
| 10500304 | Vps45                                                 | N/A | N/A |
| 10500321 | Bola1                                                 | N/A | N/A |
| 10500329 | Hist2h2aa1 /// Hist2h2aa2 /// Hist2h3c1 /// Hist2h2ac | N/A | N/A |
| 10500333 | Hist2h4                                               | N/A | N/A |
| 10500343 | Rnu1b1 /// Rnu1b6 /// Rnu1b2                          | N/A | N/A |
| 10500345 | Terc                                                  | N/A | N/A |
| 10500356 | Rnu1b1 /// Rnu1b6 /// Rnu1b2                          | N/A | N/A |
| 10500358 | Rnu1b1 /// Rnu1b6 /// Rnu1b2                          | N/A | N/A |
| 10500360 | ---                                                   | N/A | N/A |
| 10500362 | Polr3gl                                               | N/A | N/A |
| 10500371 | 6330549D23Rik                                         | N/A | N/A |
| 10500376 | Rpl21                                                 | N/A | N/A |
| 10500388 | Polr3c                                                | N/A | N/A |
| 10500404 | ---                                                   | N/A | N/A |
| 10500412 | Gpr89                                                 | N/A | N/A |

|          |                             |     |     |
|----------|-----------------------------|-----|-----|
| 10500429 | Gja8                        | N/A | N/A |
| 10500434 | Bcl9                        | N/A | N/A |
| 10500443 | Olf1402                     | N/A | N/A |
| 10500445 | Chd11                       | N/A | N/A |
| 10500469 | Pde4dip                     | N/A | N/A |
| 10500527 | LOC280487                   | N/A | N/A |
| 10500534 | Hsd3b4 /// Hsd3b5           | N/A | N/A |
| 10500539 | Hsd3b4 /// Hsd3b5           | N/A | N/A |
| 10500545 | Hsd3b5                      | N/A | N/A |
| 10500547 | Hsd3b2                      | N/A | N/A |
| 10500555 | Hsd3b3                      | N/A | N/A |
| 10500580 | ---                         | N/A | N/A |
| 10500610 | Fam46c                      | N/A | N/A |
| 10500614 | Man1a2                      | N/A | N/A |
| 10500666 | Ptgrn                       | N/A | N/A |
| 10500683 | Rangrf /// Gm10355          | N/A | N/A |
| 10500720 | Slc22a15                    | N/A | N/A |
| 10500736 | Vangl1                      | N/A | N/A |
| 10500796 | ---                         | N/A | N/A |
| 10500798 | ---                         | N/A | N/A |
| 10500802 | Atg4a /// Syt6              | N/A | N/A |
| 10500808 | Olfml3                      | N/A | N/A |
| 10500813 | Hipk1                       | N/A | N/A |
| 10500837 | Dclre1b                     | N/A | N/A |
| 10500845 | A130049A11Rik               | N/A | N/A |
| 10500847 | Magi3                       | N/A | N/A |
| 10500870 | Gm5546                      | N/A | N/A |
| 10500876 | Lrig2                       | N/A | N/A |
| 10500896 | H3f3b                       | N/A | N/A |
| 10500911 | Mov10                       | N/A | N/A |
| 10500928 | Capza1                      | N/A | N/A |
| 10500948 | Cttnbp2nl                   | N/A | N/A |
| 10500957 | Kcnd3                       | N/A | N/A |
| 10500960 | Ddx20                       | N/A | N/A |
| 10500976 | Rap1a                       | N/A | N/A |
| 10500990 | Atp5f1                      | N/A | N/A |
| 10501046 | Gm10673                     | N/A | N/A |
| 10501048 | 201001618Rik /// Dennd2d    | N/A | N/A |
| 10501051 | Cept1 /// Dram2             | N/A | N/A |
| 10501072 | Olf266                      | N/A | N/A |
| 10501091 | Rbm15                       | N/A | N/A |
| 10501096 | ---                         | N/A | N/A |
| 10501104 | Slc6a17                     | N/A | N/A |
| 10501121 | Fam40a                      | N/A | N/A |
| 10501143 | Ahcyl1                      | N/A | N/A |
| 10501183 | Eps8l3 /// 4933431E20Rik    | N/A | N/A |
| 10501199 | Gstm7                       | N/A | N/A |
| 10501208 | Gstm6                       | N/A | N/A |
| 10501218 | Gstm3                       | N/A | N/A |
| 10501222 | Gstm2                       | N/A | N/A |
| 10501229 | Gstm1                       | N/A | N/A |
| 10501235 | Gstm4                       | N/A | N/A |
| 10501244 | Ampd2                       | N/A | N/A |
| 10501282 | Cyb561d1                    | N/A | N/A |
| 10501286 | Atxn7l2                     | N/A | N/A |
| 10501313 | ---                         | N/A | N/A |
| 10501315 | Mybphl                      | N/A | N/A |
| 10501319 | Celsr2                      | N/A | N/A |
| 10501358 | Sars                        | N/A | N/A |
| 10501372 | ---                         | N/A | N/A |
| 10501374 | 5330417C22Rik               | N/A | N/A |
| 10501397 | Tmem167b                    | N/A | N/A |
| 10501420 | Stxbp3a                     | N/A | N/A |
| 10501454 | 4921515J06Rik /// Gm9857    | N/A | N/A |
| 10501456 | Fam102b                     | N/A | N/A |
| 10501468 | Ntng1                       | N/A | N/A |
| 10501483 | Ntng1                       | N/A | N/A |
| 10501485 | Prmt6                       | N/A | N/A |
| 10501489 | Hectd1                      | N/A | N/A |
| 10501492 | ---                         | N/A | N/A |
| 10501494 | Amy2a5 /// Amy2b /// Amy2a4 | N/A | N/A |
| 10501500 | Amy2a5 /// Amy2b /// Amy2a4 | N/A | N/A |
| 10501511 | Amy2a5 /// Amy2b /// Amy2a4 | N/A | N/A |
| 10501522 | Amy2a5 /// Amy2b /// Amy2a4 | N/A | N/A |
| 10501533 | Amy2a5 /// Amy2b /// Amy2a4 | N/A | N/A |
| 10501555 | Amy1                        | N/A | N/A |
| 10501567 | Rnpc3                       | N/A | N/A |
| 10501591 | A930005H10Rik               | N/A | N/A |
| 10501593 | Slc30a7                     | N/A | N/A |
| 10501649 | Rtcd1                       | N/A | N/A |
| 10501661 | Srsf3                       | N/A | N/A |
| 10501676 | Hiat1                       | N/A | N/A |
| 10501690 | Slc35a3                     | N/A | N/A |
| 10501734 | Palmd                       | N/A | N/A |

|          |                                                                           |     |     |
|----------|---------------------------------------------------------------------------|-----|-----|
| 10501742 | Rpl7a-ps3                                                                 | N/A | N/A |
| 10501754 | D3Bwg0562e                                                                | N/A | N/A |
| 10501775 | ---                                                                       | N/A | N/A |
| 10501778 | Ptbp2                                                                     | N/A | N/A |
| 10501795 | Rwdd3                                                                     | N/A | N/A |
| 10501802 | Tmem56                                                                    | N/A | N/A |
| 10501811 | Slc44a3                                                                   | N/A | N/A |
| 10501832 | Abcd3                                                                     | N/A | N/A |
| 10501857 | Gapdh /// Gm16374 /// Gm2606 /// Gm4609 /// Gm3200 /// Gm2451 /// Gm10293 | N/A | N/A |
| 10501860 | Fnbp1l                                                                    | N/A | N/A |
| 10501879 | Usp53                                                                     | N/A | N/A |
| 10501903 | Synpo2                                                                    | N/A | N/A |
| 10501922 | Snhg8 /// Snora24                                                         | N/A | N/A |
| 10501924 | Ndst3                                                                     | N/A | N/A |
| 10501963 | Ugt8a                                                                     | N/A | N/A |
| 10501971 | Ank2                                                                      | N/A | N/A |
| 10502050 | Alpk1                                                                     | N/A | N/A |
| 10502052 | Alpk1                                                                     | N/A | N/A |
| 10502058 | Ap1ar                                                                     | N/A | N/A |
| 10502076 | ---                                                                       | N/A | N/A |
| 10502079 | ---                                                                       | N/A | N/A |
| 10502081 | Enpep                                                                     | N/A | N/A |
| 10502146 | Gar1                                                                      | N/A | N/A |
| 10502165 | Sec24b                                                                    | N/A | N/A |
| 10502191 | Ostc                                                                      | N/A | N/A |
| 10502196 | Rpl34                                                                     | N/A | N/A |
| 10502199 | ---                                                                       | N/A | N/A |
| 10502205 | Hadh                                                                      | N/A | N/A |
| 10502214 | Cyp2u1                                                                    | N/A | N/A |
| 10502224 | Sgms2                                                                     | N/A | N/A |
| 10502232 | Aimp1                                                                     | N/A | N/A |
| 10502284 | Tet2                                                                      | N/A | N/A |
| 10502329 | Cisd2                                                                     | N/A | N/A |
| 10502333 | Gm16500                                                                   | N/A | N/A |
| 10502375 | Mttp                                                                      | N/A | N/A |
| 10502405 | Metap1                                                                    | N/A | N/A |
| 10502417 | 2410002F23Rik                                                             | N/A | N/A |
| 10502419 | Rap1gds1                                                                  | N/A | N/A |
| 10502438 | Gm4862                                                                    | N/A | N/A |
| 10502440 | ---                                                                       | N/A | N/A |
| 10502469 | Pllim5                                                                    | N/A | N/A |
| 10502482 | ---                                                                       | N/A | N/A |
| 10502484 | Pkn2                                                                      | N/A | N/A |
| 10502510 | Lmo4                                                                      | N/A | N/A |
| 10502522 | Hs2st1                                                                    | N/A | N/A |
| 10502535 | ---                                                                       | N/A | N/A |
| 10502655 | Cyr61                                                                     | N/A | N/A |
| 10502682 | ---                                                                       | N/A | N/A |
| 10502686 | Dnase2b                                                                   | N/A | N/A |
| 10502714 | Rpf1                                                                      | N/A | N/A |
| 10502732 | Prkacb                                                                    | N/A | N/A |
| 10502748 | Lphn2                                                                     | N/A | N/A |
| 10502766 | Lphn2                                                                     | N/A | N/A |
| 10502770 | Lphn2                                                                     | N/A | N/A |
| 10502772 | Lphn2                                                                     | N/A | N/A |
| 10502774 | Lphn2                                                                     | N/A | N/A |
| 10502778 | Lphn2                                                                     | N/A | N/A |
| 10502780 | Lphn2                                                                     | N/A | N/A |
| 10502783 | Gm9912                                                                    | N/A | N/A |
| 10502785 | Gm10287                                                                   | N/A | N/A |
| 10502787 | Rpsa /// Rpsa-ps10                                                        | N/A | N/A |
| 10502791 | Ifi44                                                                     | N/A | N/A |
| 10502823 | Dnajb4                                                                    | N/A | N/A |
| 10502845 | Fam73a                                                                    | N/A | N/A |
| 10502863 | Aks                                                                       | N/A | N/A |
| 10502881 | St6galnac5                                                                | N/A | N/A |
| 10502890 | St6galnac3                                                                | N/A | N/A |
| 10502898 | Ube2l3 /// Gm10145                                                        | N/A | N/A |
| 10502900 | 5730460C07Rik                                                             | N/A | N/A |
| 10502934 | Rabggtb                                                                   | N/A | N/A |
| 10502949 | ---                                                                       | N/A | N/A |
| 10502951 | Acadm                                                                     | N/A | N/A |
| 10502961 | Lhx8                                                                      | N/A | N/A |
| 10502973 | Tyw3                                                                      | N/A | N/A |
| 10503008 | ---                                                                       | N/A | N/A |
| 10503019 | 4930566N20Rik                                                             | N/A | N/A |
| 10503023 | Cth                                                                       | N/A | N/A |
| 10503036 | Srsf11                                                                    | N/A | N/A |
| 10503054 | Lrrc7                                                                     | N/A | N/A |
| 10503085 | Tgs1                                                                      | N/A | N/A |
| 10503098 | Lyn                                                                       | N/A | N/A |
| 10503107 | 6330407A03Rik                                                             | N/A | N/A |
| 10503116 | LOC100036540                                                              | N/A | N/A |
| 10503118 | Fam110b                                                                   | N/A | N/A |



|          |                    |     |     |
|----------|--------------------|-----|-----|
| 10503123 | Ubxn2b             | N/A | N/A |
| 10503134 | Sdcbp              | N/A | N/A |
| 10503145 | ---                | N/A | N/A |
| 10503148 | ---                | N/A | N/A |
| 10503161 | Chd7               | N/A | N/A |
| 10503166 | Chd7               | N/A | N/A |
| 10503168 | Chd7               | N/A | N/A |
| 10503170 | Chd7               | N/A | N/A |
| 10503172 | Chd7               | N/A | N/A |
| 10503174 | Chd7               | N/A | N/A |
| 10503176 | Chd7               | N/A | N/A |
| 10503178 | Chd7               | N/A | N/A |
| 10503180 | Chd7               | N/A | N/A |
| 10503182 | Chd7               | N/A | N/A |
| 10503184 | Chd7               | N/A | N/A |
| 10503186 | Chd7               | N/A | N/A |
| 10503188 | Chd7               | N/A | N/A |
| 10503192 | Chd7               | N/A | N/A |
| 10503194 | Chd7               | N/A | N/A |
| 10503196 | Chd7               | N/A | N/A |
| 10503198 | Chd7               | N/A | N/A |
| 10503200 | Chd7               | N/A | N/A |
| 10503202 | Chd7               | N/A | N/A |
| 10503204 | Chd7               | N/A | N/A |
| 10503206 | Chd7               | N/A | N/A |
| 10503208 | Chd7               | N/A | N/A |
| 10503210 | Chd7               | N/A | N/A |
| 10503212 | Chd7               | N/A | N/A |
| 10503214 | Chd7               | N/A | N/A |
| 10503216 | Chd7               | N/A | N/A |
| 10503218 | Chd7               | N/A | N/A |
| 10503222 | Chd7               | N/A | N/A |
| 10503232 | ---                | N/A | N/A |
| 10503234 | Asph /// Clvs1     | N/A | N/A |
| 10503244 | ---                | N/A | N/A |
| 10503251 | 2610301B20Rik      | N/A | N/A |
| 10503257 | ---                | N/A | N/A |
| 10503259 | Trp53inp1          | N/A | N/A |
| 10503281 | Gxylt1             | N/A | N/A |
| 10503303 | 1110037F02Rik      | N/A | N/A |
| 10503305 | 1110037F02Rik      | N/A | N/A |
| 10503359 | C430048L16Rik      | N/A | N/A |
| 10503361 | ---                | N/A | N/A |
| 10503363 | Rbm12b             | N/A | N/A |
| 10503370 | Hnrnpa3 /// Gm6793 | N/A | N/A |
| 10503374 | ---                | N/A | N/A |
| 10503376 | Gm11818            | N/A | N/A |
| 10503382 | Runx1t1            | N/A | N/A |
| 10503399 | Myl6 /// Gm8894    | N/A | N/A |
| 10503401 | Tmem55a            | N/A | N/A |
| 10503410 | Tmem64             | N/A | N/A |
| 10503416 | Calb1              | N/A | N/A |
| 10503448 | Mmp16              | N/A | N/A |
| 10503508 | Ggh                | N/A | N/A |
| 10503520 | Ttpa               | N/A | N/A |
| 10503523 | Ggh                | N/A | N/A |
| 10503534 | Ccnc               | N/A | N/A |
| 10503551 | Usp45              | N/A | N/A |
| 10503570 | Sfrs18             | N/A | N/A |
| 10503584 | Coq3               | N/A | N/A |
| 10503593 | 6230409E13Rik      | N/A | N/A |
| 10503613 | ---                | N/A | N/A |
| 10503615 | ---                | N/A | N/A |
| 10503643 | Ndufaf4            | N/A | N/A |
| 10503647 | Gpr63              | N/A | N/A |
| 10503650 | ---                | N/A | N/A |
| 10503654 | ---                | N/A | N/A |
| 10503656 | ---                | N/A | N/A |
| 10503659 | Epha7              | N/A | N/A |
| 10503680 | Map3k7             | N/A | N/A |
| 10503695 | Bach2              | N/A | N/A |
| 10503709 | D130062J21Rik      | N/A | N/A |
| 10503711 | Casp8ap2           | N/A | N/A |
| 10503723 | Mdn1               | N/A | N/A |
| 10503828 | Lyrm2              | N/A | N/A |
| 10503833 | Rplp1              | N/A | N/A |
| 10503835 | Rragd              | N/A | N/A |
| 10503845 | Ube2j1             | N/A | N/A |
| 10503876 | Srsf13b            | N/A | N/A |
| 10503882 | Rngtt              | N/A | N/A |
| 10503902 | Cnr1               | N/A | N/A |
| 10503911 | Polr1d             | N/A | N/A |
| 10503915 | Chchd2             | N/A | N/A |
| 10503917 | Akirin2            | N/A | N/A |

|          |                                                                              |     |     |
|----------|------------------------------------------------------------------------------|-----|-----|
| 10503952 | lfnk                                                                         | N/A | N/A |
| 10503955 | ---                                                                          | N/A | N/A |
| 10503963 | ---                                                                          | N/A | N/A |
| 10503966 | Aco1                                                                         | N/A | N/A |
| 10503989 | Ndufb6                                                                       | N/A | N/A |
| 10503995 | Dnaja1                                                                       | N/A | N/A |
| 10504000 | Dnaja1 /// Mir207                                                            | N/A | N/A |
| 10504008 | Chmp5                                                                        | N/A | N/A |
| 10504017 | Nfx1                                                                         | N/A | N/A |
| 10504047 | Ube2r2                                                                       | N/A | N/A |
| 10504054 | ---                                                                          | N/A | N/A |
| 10504056 | Ubap1                                                                        | N/A | N/A |
| 10504064 | Nudt2                                                                        | N/A | N/A |
| 10504072 | Dnaic1                                                                       | N/A | N/A |
| 10504094 | Galt                                                                         | N/A | N/A |
| 10504106 | Il11ra2 /// Gm2002 /// Il11ra1 /// Gm13305                                   | N/A | N/A |
| 10504121 | Gm3893                                                                       | N/A | N/A |
| 10504123 | Gm3893                                                                       | N/A | N/A |
| 10504125 | Gm3893                                                                       | N/A | N/A |
| 10504127 | Ccl21c                                                                       | N/A | N/A |
| 10504132 | Ccl19 /// Gm13309 /// Gm2442 /// LOC100043921                                | N/A | N/A |
| 10504137 | 4933409K07Rik /// Gm10590                                                    | N/A | N/A |
| 10504139 | Gm3893 /// 4933409K07Rik /// 4930578G10Rik /// Gm5859 /// Gm7819 /// Gm10590 | N/A | N/A |
| 10504148 | Gm3893 /// 4933409K07Rik /// Gm5859 /// Gm7819 /// Gm10590 /// LOC100503421  | N/A | N/A |
| 10504154 | Ccl21c                                                                       | N/A | N/A |
| 10504159 | Ccl19 /// Gm13309 /// Gm2442 /// LOC100043921                                | N/A | N/A |
| 10504164 | Ccl27a /// Gm13306                                                           | N/A | N/A |
| 10504169 | 4933409K07Rik /// Gm7819 /// Gm3893 /// Gm10590 /// LOC100503421             | N/A | N/A |
| 10504172 | 4933409K07Rik /// 4930578G10Rik /// Gm7819 /// Gm3893 /// Gm10590            | N/A | N/A |
| 10504178 | Gm3893 /// 4933409K07Rik /// Gm7819 /// Gm10590                              | N/A | N/A |
| 10504183 | Ccl21c                                                                       | N/A | N/A |
| 10504188 | Ccl19 /// Gm13309 /// Gm2442 /// LOC100043921                                | N/A | N/A |
| 10504194 | Ccl27a /// Gm13306                                                           | N/A | N/A |
| 10504199 | ---                                                                          | N/A | N/A |
| 10504201 | 4933409K07Rik /// Gm10590                                                    | N/A | N/A |
| 10504218 | Dnajb5                                                                       | N/A | N/A |
| 10504316 | Tesk1                                                                        | N/A | N/A |
| 10504329 | Ccdc107                                                                      | N/A | N/A |
| 10504349 | Creb3 /// Gba2                                                               | N/A | N/A |
| 10504373 | Gm12472                                                                      | N/A | N/A |
| 10504398 | Serf2                                                                        | N/A | N/A |
| 10504402 | Tmem8b                                                                       | N/A | N/A |
| 10504417 | Hrct1                                                                        | N/A | N/A |
| 10504450 | Glipr2                                                                       | N/A | N/A |
| 10504456 | Ccin                                                                         | N/A | N/A |
| 10504458 | CIta                                                                         | N/A | N/A |
| 10504466 | ---                                                                          | N/A | N/A |
| 10504499 | Zcchc7                                                                       | N/A | N/A |
| 10504504 | Grhpr                                                                        | N/A | N/A |
| 10504514 | 1700055D18Rik                                                                | N/A | N/A |
| 10504534 | Frmpr1                                                                       | N/A | N/A |
| 10504551 | Rg9mtd3                                                                      | N/A | N/A |
| 10504562 | Exosc3                                                                       | N/A | N/A |
| 10504564 | Dcaf10                                                                       | N/A | N/A |
| 10504582 | 1300002K09Rik                                                                | N/A | N/A |
| 10504606 | Aldh1b1                                                                      | N/A | N/A |
| 10504609 | ---                                                                          | N/A | N/A |
| 10504611 | E230008N13Rik                                                                | N/A | N/A |
| 10504615 | E230008N13Rik                                                                | N/A | N/A |
| 10504617 | E230008N13Rik                                                                | N/A | N/A |
| 10504619 | E230008N13Rik                                                                | N/A | N/A |
| 10504621 | E230008N13Rik                                                                | N/A | N/A |
| 10504630 | E230008N13Rik                                                                | N/A | N/A |
| 10504632 | E230008N13Rik                                                                | N/A | N/A |
| 10504634 | E230008N13Rik                                                                | N/A | N/A |
| 10504636 | E230008N13Rik                                                                | N/A | N/A |
| 10504638 | E230008N13Rik                                                                | N/A | N/A |
| 10504640 | E230008N13Rik                                                                | N/A | N/A |
| 10504642 | E230008N13Rik                                                                | N/A | N/A |
| 10504644 | E230008N13Rik                                                                | N/A | N/A |
| 10504646 | E230008N13Rik                                                                | N/A | N/A |
| 10504648 | E230008N13Rik                                                                | N/A | N/A |
| 10504650 | E230008N13Rik                                                                | N/A | N/A |
| 10504652 | E230008N13Rik                                                                | N/A | N/A |
| 10504654 | E230008N13Rik                                                                | N/A | N/A |
| 10504656 | E230008N13Rik                                                                | N/A | N/A |
| 10504658 | E230008N13Rik                                                                | N/A | N/A |
| 10504660 | E230008N13Rik                                                                | N/A | N/A |
| 10504662 | E230008N13Rik                                                                | N/A | N/A |
| 10504664 | E230008N13Rik                                                                | N/A | N/A |
| 10504666 | E230008N13Rik                                                                | N/A | N/A |
| 10504668 | E230008N13Rik                                                                | N/A | N/A |
| 10504670 | E230008N13Rik                                                                | N/A | N/A |
| 10504672 | Tdrd7                                                                        | N/A | N/A |

|          |                                 |     |     |
|----------|---------------------------------|-----|-----|
| 10504690 | ---                             | N/A | N/A |
| 10504692 | Tmod1 /// Tstd2                 | N/A | N/A |
| 10504703 | Ncbp1                           | N/A | N/A |
| 10504728 | Foxe1                           | N/A | N/A |
| 10504751 | ---                             | N/A | N/A |
| 10504753 | LOC641050                       | N/A | N/A |
| 10504755 | ---                             | N/A | N/A |
| 10504757 | BC005685                        | N/A | N/A |
| 10504759 | ---                             | N/A | N/A |
| 10504761 | LOC641050                       | N/A | N/A |
| 10504817 | Tgfb1                           | N/A | N/A |
| 10504849 | Stx17                           | N/A | N/A |
| 10504865 | Invs                            | N/A | N/A |
| 10504891 | Tmeff1                          | N/A | N/A |
| 10504902 | Murc                            | N/A | N/A |
| 10504905 | E130309F12Rik                   | N/A | N/A |
| 10504912 | ---                             | N/A | N/A |
| 10504914 | ---                             | N/A | N/A |
| 10504916 | ---                             | N/A | N/A |
| 10504926 | Rnf20                           | N/A | N/A |
| 10504955 | ---                             | N/A | N/A |
| 10504986 | ---                             | N/A | N/A |
| 10504988 | Olf275                          | N/A | N/A |
| 10504990 | Olf270                          | N/A | N/A |
| 10505028 | Slc44a1                         | N/A | N/A |
| 10505030 | Fsd1l                           | N/A | N/A |
| 10505044 | Fktn                            | N/A | N/A |
| 10505064 | Tmem38b                         | N/A | N/A |
| 10505071 | Tmem38b                         | N/A | N/A |
| 10505073 | Zfp462                          | N/A | N/A |
| 10505090 | Rpl29                           | N/A | N/A |
| 10505092 | Rad23b                          | N/A | N/A |
| 10505105 | Actl7b                          | N/A | N/A |
| 10505107 | Actl7a                          | N/A | N/A |
| 10505109 | BC026590                        | N/A | N/A |
| 10505120 | Palm2 /// Akap2                 | N/A | N/A |
| 10505143 | Palm2 /// Akap2                 | N/A | N/A |
| 10505163 | Zkscan16                        | N/A | N/A |
| 10505187 | Ugcg                            | N/A | N/A |
| 10505198 | Rod1                            | N/A | N/A |
| 10505200 | Hsd1l2                          | N/A | N/A |
| 10505224 | Snx30                           | N/A | N/A |
| 10505237 | ---                             | N/A | N/A |
| 10505240 | ---                             | N/A | N/A |
| 10505246 | ---                             | N/A | N/A |
| 10505249 | ---                             | N/A | N/A |
| 10505252 | ---                             | N/A | N/A |
| 10505254 | ---                             | N/A | N/A |
| 10505258 | ---                             | N/A | N/A |
| 10505261 | ---                             | N/A | N/A |
| 10505266 | ---                             | N/A | N/A |
| 10505268 | ---                             | N/A | N/A |
| 10505276 | Slc31a1                         | N/A | N/A |
| 10505282 | Prpf4                           | N/A | N/A |
| 10505436 | Mir455                          | N/A | N/A |
| 10505438 | Orm1                            | N/A | N/A |
| 10505445 | Orm3                            | N/A | N/A |
| 10505451 | Orm2                            | N/A | N/A |
| 10505457 | ---                             | N/A | N/A |
| 10505461 | Atp6v1g1                        | N/A | N/A |
| 10505489 | Pappa                           | N/A | N/A |
| 10505515 | ---                             | N/A | N/A |
| 10505526 | Rps2 /// Rps2-ps6               | N/A | N/A |
| 10505528 | ---                             | N/A | N/A |
| 10505532 | ---                             | N/A | N/A |
| 10505568 | Frd3                            | N/A | N/A |
| 10505587 | Kdm4c                           | N/A | N/A |
| 10505612 | ---                             | N/A | N/A |
| 10505623 | D4Bwg0951e                      | N/A | N/A |
| 10505630 | Snapc3                          | N/A | N/A |
| 10505705 | Sh3gl2                          | N/A | N/A |
| 10505747 | Rraga                           | N/A | N/A |
| 10505779 | Acer2                           | N/A | N/A |
| 10505788 | Acer2                           | N/A | N/A |
| 10505791 | BC057079                        | N/A | N/A |
| 10505837 | Mir491                          | N/A | N/A |
| 10505839 | Klh9                            | N/A | N/A |
| 10505841 | Gm13290 /// Gm13271 /// Gm13275 | N/A | N/A |
| 10505843 | Gm13271 /// Gm13275             | N/A | N/A |
| 10505845 | Gm13290                         | N/A | N/A |
| 10505848 | Gm13291                         | N/A | N/A |
| 10505852 | Gm13292                         | N/A | N/A |
| 10505856 | Gm13293                         | N/A | N/A |
| 10505858 | Gm13294                         | N/A | N/A |

|          |                 |     |     |
|----------|-----------------|-----|-----|
| 10505862 | Gm13295         | N/A | N/A |
| 10505864 | Gm13296         | N/A | N/A |
| 10505866 | Gm13297         | N/A | N/A |
| 10505868 | Gm13298         | N/A | N/A |
| 10505870 | Gm13299         | N/A | N/A |
| 10505872 | Gm13300         | N/A | N/A |
| 10505874 | Gm13301         | N/A | N/A |
| 10505879 | Ifna7           | N/A | N/A |
| 10505884 | Ifna6           | N/A | N/A |
| 10505888 | Ifna5           | N/A | N/A |
| 10505890 | Ifna4           | N/A | N/A |
| 10505892 | Ifna12          | N/A | N/A |
| 10505917 | ---             | N/A | N/A |
| 10505922 | ---             | N/A | N/A |
| 10505925 | ---             | N/A | N/A |
| 10505927 | ---             | N/A | N/A |
| 10505954 | Tek             | N/A | N/A |
| 10505978 | ---             | N/A | N/A |
| 10505980 | Fggy            | N/A | N/A |
| 10505982 | Fggy            | N/A | N/A |
| 10505994 | Fggy            | N/A | N/A |
| 10505996 | Fggy            | N/A | N/A |
| 10505998 | Fggy            | N/A | N/A |
| 10506004 | Hook1           | N/A | N/A |
| 10506029 | ---             | N/A | N/A |
| 10506031 | Nfia            | N/A | N/A |
| 10506050 | Nfia            | N/A | N/A |
| 10506052 | ---             | N/A | N/A |
| 10506058 | Inadl           | N/A | N/A |
| 10506108 | ---             | N/A | N/A |
| 10506125 | Angpt3          | N/A | N/A |
| 10506134 | Atg4c           | N/A | N/A |
| 10506146 | Gm10305         | N/A | N/A |
| 10506148 | Gm12689         | N/A | N/A |
| 10506186 | ---             | N/A | N/A |
| 10506188 | Pgm2            | N/A | N/A |
| 10506201 | Ror1            | N/A | N/A |
| 10506254 | Raver2          | N/A | N/A |
| 10506267 | ---             | N/A | N/A |
| 10506269 | Ak4             | N/A | N/A |
| 10506274 | Dnajc6          | N/A | N/A |
| 10506296 | ---             | N/A | N/A |
| 10506298 | Leprot          | N/A | N/A |
| 10506330 | ---             | N/A | N/A |
| 10506335 | Pde4b           | N/A | N/A |
| 10506360 | Sgip1           | N/A | N/A |
| 10506397 | Mier1           | N/A | N/A |
| 10506415 | Oma1            | N/A | N/A |
| 10506424 | Actg1           | N/A | N/A |
| 10506427 | ---             | N/A | N/A |
| 10506431 | Gm10304         | N/A | N/A |
| 10506433 | Dab1            | N/A | N/A |
| 10506452 | AY512949        | N/A | N/A |
| 10506454 | C8b             | N/A | N/A |
| 10506488 | Ppap2b          | N/A | N/A |
| 10506496 | ---             | N/A | N/A |
| 10506500 | Usp24           | N/A | N/A |
| 10506569 | Usp24           | N/A | N/A |
| 10506571 | Dhcr24          | N/A | N/A |
| 10506603 | Ssbp3           | N/A | N/A |
| 10506643 | Tmem59          | N/A | N/A |
| 10506658 | Hspb11          | N/A | N/A |
| 10506668 | Yipf1           | N/A | N/A |
| 10506680 | Tmem48          | N/A | N/A |
| 10506714 | Lrp8            | N/A | N/A |
| 10506736 | Magoh           | N/A | N/A |
| 10506767 | Echdc2          | N/A | N/A |
| 10506781 | 2010305A19Rik   | N/A | N/A |
| 10506786 | Zcchc11         | N/A | N/A |
| 10506820 | ---             | N/A | N/A |
| 10506870 | Txndc12         | N/A | N/A |
| 10506880 | Kti12           | N/A | N/A |
| 10506893 | Nrd1 /// Osbp19 | N/A | N/A |
| 10506939 | Eps15           | N/A | N/A |
| 10506989 | Faf1            | N/A | N/A |
| 10507015 | Agbl4           | N/A | N/A |
| 10507032 | Bend5           | N/A | N/A |
| 10507099 | Gm12824         | N/A | N/A |
| 10507101 | Gm12824         | N/A | N/A |
| 10507110 | ---             | N/A | N/A |
| 10507137 | Pdzk1ip1        | N/A | N/A |
| 10507143 | Cyp4a12a        | N/A | N/A |
| 10507152 | Cyp4a12b        | N/A | N/A |
| 10507160 | ---             | N/A | N/A |

|          |                                 |     |     |
|----------|---------------------------------|-----|-----|
| 10507171 | Cyp4a31                         | N/A | N/A |
| 10507177 | Cyp4a10 /// Cyp4a31 /// Cyp4a32 | N/A | N/A |
| 10507190 | 4732418C07Rik                   | N/A | N/A |
| 10507203 | Atpaf1                          | N/A | N/A |
| 10507213 | Mobkl2c                         | N/A | N/A |
| 10507218 | Mknk1                           | N/A | N/A |
| 10507231 | Kncn                            | N/A | N/A |
| 10507236 | ---                             | N/A | N/A |
| 10507238 | Lrrc41                          | N/A | N/A |
| 10507250 | Pomgnt1                         | N/A | N/A |
| 10507273 | Pik3r3                          | N/A | N/A |
| 10507284 | ---                             | N/A | N/A |
| 10507299 | Gpbp11                          | N/A | N/A |
| 10507328 | Prdx1                           | N/A | N/A |
| 10507347 | Tesk2 /// Toe1                  | N/A | N/A |
| 10507379 | Zswim5                          | N/A | N/A |
| 10507394 | Hectd3                          | N/A | N/A |
| 10507418 | Eif2b3                          | N/A | N/A |
| 10507431 | ---                             | N/A | N/A |
| 10507471 | ---                             | N/A | N/A |
| 10507473 | ---                             | N/A | N/A |
| 10507475 | ---                             | N/A | N/A |
| 10507484 | Eri3                            | N/A | N/A |
| 10507500 | Slc6a9 /// Ccdc24               | N/A | N/A |
| 10507518 | ---                             | N/A | N/A |
| 10507520 | Hyi                             | N/A | N/A |
| 10507529 | Med8                            | N/A | N/A |
| 10507539 | Elovl1                          | N/A | N/A |
| 10507555 | ---                             | N/A | N/A |
| 10507557 | Ebna1bp2 /// D4Ert617e          | N/A | N/A |
| 10507567 | Olf62                           | N/A | N/A |
| 10507574 | Olf1339                         | N/A | N/A |
| 10507576 | Olf1331                         | N/A | N/A |
| 10507578 | Olf1330                         | N/A | N/A |
| 10507594 | Slc2a1                          | N/A | N/A |
| 10507606 | Ccdc23                          | N/A | N/A |
| 10507655 | ---                             | N/A | N/A |
| 10507657 | Foxj3                           | N/A | N/A |
| 10507671 | Guca2a                          | N/A | N/A |
| 10507675 | Hivep3                          | N/A | N/A |
| 10507677 | Hivep3                          | N/A | N/A |
| 10507699 | Scmh1                           | N/A | N/A |
| 10507731 | Rims3                           | N/A | N/A |
| 10507773 | ---                             | N/A | N/A |
| 10507775 | ---                             | N/A | N/A |
| 10507784 | Ppt1                            | N/A | N/A |
| 10507804 | Trit1                           | N/A | N/A |
| 10507824 | Oxct2b /// Oxct2a               | N/A | N/A |
| 10507826 | Hpcal4                          | N/A | N/A |
| 10507833 | Nt5c1a                          | N/A | N/A |
| 10507840 | Heyl                            | N/A | N/A |
| 10507851 | Pabpc4                          | N/A | N/A |
| 10507870 | ---                             | N/A | N/A |
| 10507872 | ---                             | N/A | N/A |
| 10507885 | Mycbp                           | N/A | N/A |
| 10507903 | ---                             | N/A | N/A |
| 10507905 | Pou3f1                          | N/A | N/A |
| 10507914 | Sf3a3                           | N/A | N/A |
| 10507931 | Mir697                          | N/A | N/A |
| 10507961 | Mtf1                            | N/A | N/A |
| 10507983 | Epha10                          | N/A | N/A |
| 10507990 | Epha10                          | N/A | N/A |
| 10508012 | Rspo1                           | N/A | N/A |
| 10508019 | Gnl2                            | N/A | N/A |
| 10508042 | Meaf6                           | N/A | N/A |
| 10508052 | Grik3                           | N/A | N/A |
| 10508069 | Ftl2 /// Ftl1 /// Mir692-1      | N/A | N/A |
| 10508089 | Mrps15                          | N/A | N/A |
| 10508099 | Oscp1                           | N/A | N/A |
| 10508112 | Lsm10                           | N/A | N/A |
| 10508115 | Stk40                           | N/A | N/A |
| 10508135 | Trappc3                         | N/A | N/A |
| 10508149 | Tekt2                           | N/A | N/A |
| 10508178 | 5730409E04Rik                   | N/A | N/A |
| 10508190 | AU040320                        | N/A | N/A |
| 10508217 | Sfpq                            | N/A | N/A |
| 10508228 | Zmym6 /// Gm12942               | N/A | N/A |
| 10508247 | ---                             | N/A | N/A |
| 10508249 | Gm12942                         | N/A | N/A |
| 10508253 | Dlgap3                          | N/A | N/A |
| 10508269 | BC003266                        | N/A | N/A |
| 10508351 | Phc2                            | N/A | N/A |
| 10508376 | Trim62                          | N/A | N/A |
| 10508382 | Ak2                             | N/A | N/A |

|          |                        |     |     |
|----------|------------------------|-----|-----|
| 10508392 | Rnf19b                 | N/A | N/A |
| 10508412 | Fndc5                  | N/A | N/A |
| 10508420 | Yars                   | N/A | N/A |
| 10508452 | ---                    | N/A | N/A |
| 10508454 | Bsdc1                  | N/A | N/A |
| 10508465 | Marcks1                | N/A | N/A |
| 10508468 | 2510006D16Rik          | N/A | N/A |
| 10508477 | ---                    | N/A | N/A |
| 10508479 | Ptp4a2                 | N/A | N/A |
| 10508486 | LOC100505143           | N/A | N/A |
| 10508488 | ---                    | N/A | N/A |
| 10508490 | Srsf5                  | N/A | N/A |
| 10508500 | Bai2                   | N/A | N/A |
| 10508608 | Pef1                   | N/A | N/A |
| 10508614 | Fabp3                  | N/A | N/A |
| 10508645 | Snord85                | N/A | N/A |
| 10508647 | ---                    | N/A | N/A |
| 10508649 | ---                    | N/A | N/A |
| 10508663 | Laptm5                 | N/A | N/A |
| 10508686 | Mecr                   | N/A | N/A |
| 10508697 | Srsf4                  | N/A | N/A |
| 10508707 | Tmem200b               | N/A | N/A |
| 10508709 | Gm10300                | N/A | N/A |
| 10508711 | Taf12                  | N/A | N/A |
| 10508719 | Snora16a               | N/A | N/A |
| 10508721 | Snora44                | N/A | N/A |
| 10508723 | Snora61                | N/A | N/A |
| 10508725 | ---                    | N/A | N/A |
| 10508727 | Dnajc8                 | N/A | N/A |
| 10508734 | Ptafr                  | N/A | N/A |
| 10508737 | Eya3                   | N/A | N/A |
| 10508770 | Gm13033                | N/A | N/A |
| 10508788 | Ahdc1                  | N/A | N/A |
| 10508797 | Gm10151                | N/A | N/A |
| 10508800 | Gm3579                 | N/A | N/A |
| 10508805 | Wasf2                  | N/A | N/A |
| 10508860 | Slc9a1                 | N/A | N/A |
| 10508879 | Fam46b                 | N/A | N/A |
| 10508883 | 1810019J16Rik          | N/A | N/A |
| 10508887 | Nr0b2                  | N/A | N/A |
| 10508901 | Gpn2                   | N/A | N/A |
| 10508907 | Lin28a                 | N/A | N/A |
| 10508972 | Gm5589                 | N/A | N/A |
| 10508974 | Pafah2                 | N/A | N/A |
| 10508986 | Stmn1                  | N/A | N/A |
| 10508992 | Paqr7                  | N/A | N/A |
| 10508996 | 2610002D18Rik          | N/A | N/A |
| 10509000 | ---                    | N/A | N/A |
| 10509014 | D4Wsu53e               | N/A | N/A |
| 10509023 | Syf2                   | N/A | N/A |
| 10509063 | Il22ra1                | N/A | N/A |
| 10509071 | 9130219A07Rik          | N/A | N/A |
| 10509127 | Fuca1                  | N/A | N/A |
| 10509137 | Hmgcl                  | N/A | N/A |
| 10509161 | ---                    | N/A | N/A |
| 10509163 | Id3                    | N/A | N/A |
| 10509204 | Tcea3                  | N/A | N/A |
| 10509228 | Hnrnpr                 | N/A | N/A |
| 10509244 | 6030445D17Rik          | N/A | N/A |
| 10509246 | Luzp1                  | N/A | N/A |
| 10509253 | 4930549C01Rik          | N/A | N/A |
| 10509273 | Wnt4                   | N/A | N/A |
| 10509275 | Rpl31 /// Gm16382      | N/A | N/A |
| 10509379 | Usp48                  | N/A | N/A |
| 10509441 | Ece1                   | N/A | N/A |
| 10509463 | Eif4g3                 | N/A | N/A |
| 10509500 | Hp1bp3                 | N/A | N/A |
| 10509542 | Ddost                  | N/A | N/A |
| 10509555 | ---                    | N/A | N/A |
| 10509557 | AB041806               | N/A | N/A |
| 10509560 | Rpl38                  | N/A | N/A |
| 10509562 | Mul1                   | N/A | N/A |
| 10509568 | Camk2n1                | N/A | N/A |
| 10509571 | Pla2g2c /// Ubxn10     | N/A | N/A |
| 10509596 | Rnf186                 | N/A | N/A |
| 10509601 | Tmco4                  | N/A | N/A |
| 10509620 | Capzb                  | N/A | N/A |
| 10509635 | Akr7a5                 | N/A | N/A |
| 10509645 | C230096C10Rik /// Ubr4 | N/A | N/A |
| 10509790 | Aldh4a1                | N/A | N/A |
| 10509820 | Rcc2                   | N/A | N/A |
| 10509856 | ---                    | N/A | N/A |
| 10509868 | Atp13a2                | N/A | N/A |
| 10509901 | Mfap2                  | N/A | N/A |

|          |                                                                                               |     |     |
|----------|-----------------------------------------------------------------------------------------------|-----|-----|
| 10509927 | D4Erttd22e /// 4921514A10Rik                                                                  | N/A | N/A |
| 10509930 | Fbxo42                                                                                        | N/A | N/A |
| 10509941 | 6330545A04Rik                                                                                 | N/A | N/A |
| 10509947 | Arhgef19                                                                                      | N/A | N/A |
| 10509965 | Epha2                                                                                         | N/A | N/A |
| 10509985 | Fam131c                                                                                       | N/A | N/A |
| 10510019 | B330016D10Rik                                                                                 | N/A | N/A |
| 10510022 | Tmem82 /// AI507597                                                                           | N/A | N/A |
| 10510025 | Agmat                                                                                         | N/A | N/A |
| 10510047 | Gm10565                                                                                       | N/A | N/A |
| 10510061 | Pramef8                                                                                       | N/A | N/A |
| 10510068 | BC080695 /// Gm13057 /// Gm13109 /// Gm13043 /// Gm13119 /// Gm13040 /// Gm13101              | N/A | N/A |
| 10510072 | BC080695 /// Gm13057 /// Gm13101 /// Gm13109 /// Gm13043 /// Gm13119 /// Gm13040              | N/A | N/A |
| 10510117 | ---                                                                                           | N/A | N/A |
| 10510125 | Mcrs1 /// LOC100505102                                                                        | N/A | N/A |
| 10510127 | Gm13177                                                                                       | N/A | N/A |
| 10510129 | Dhrs3                                                                                         | N/A | N/A |
| 10510142 | Smarca5 /// Vmn2r-ps14                                                                        | N/A | N/A |
| 10510162 | Ppp2r5a                                                                                       | N/A | N/A |
| 10510165 | Gm13238                                                                                       | N/A | N/A |
| 10510167 | Gm13235                                                                                       | N/A | N/A |
| 10510170 | Gm13235                                                                                       | N/A | N/A |
| 10510172 | Hmgb2                                                                                         | N/A | N/A |
| 10510176 | Smarca5                                                                                       | N/A | N/A |
| 10510194 | Hmgb1                                                                                         | N/A | N/A |
| 10510197 | Ppp2r5a                                                                                       | N/A | N/A |
| 10510201 | Rex2 /// Gm13138 /// Gm13152 /// Gm13235 /// Zfp600 /// Gm13242 /// Gm13151 /// 2610305D13Rik | N/A | N/A |
| 10510212 | Hmgb1                                                                                         | N/A | N/A |
| 10510215 | Gm13139                                                                                       | N/A | N/A |
| 10510219 | Cdv3 /// Gm13238                                                                              | N/A | N/A |
| 10510221 | Gm3579                                                                                        | N/A | N/A |
| 10510225 | Gm13235                                                                                       | N/A | N/A |
| 10510227 | Hmgb1                                                                                         | N/A | N/A |
| 10510239 | Gm16503                                                                                       | N/A | N/A |
| 10510252 | ---                                                                                           | N/A | N/A |
| 10510254 | Fv1                                                                                           | N/A | N/A |
| 10510256 | 2510039O18Rik                                                                                 | N/A | N/A |
| 10510305 | Mtor                                                                                          | N/A | N/A |
| 10510365 | Exosc10                                                                                       | N/A | N/A |
| 10510391 | Srm                                                                                           | N/A | N/A |
| 10510399 | Masp2 /// Tardbp                                                                              | N/A | N/A |
| 10510445 | ---                                                                                           | N/A | N/A |
| 10510447 | Cas21                                                                                         | N/A | N/A |
| 10510452 | Dffa                                                                                          | N/A | N/A |
| 10510462 | Trmt112                                                                                       | N/A | N/A |
| 10510464 | Lzic                                                                                          | N/A | N/A |
| 10510482 | Clstn1                                                                                        | N/A | N/A |
| 10510505 | ---                                                                                           | N/A | N/A |
| 10510507 | Mir34a                                                                                        | N/A | N/A |
| 10510546 | Eno1                                                                                          | N/A | N/A |
| 10510552 | Rere                                                                                          | N/A | N/A |
| 10510574 | Errfi1                                                                                        | N/A | N/A |
| 10510592 | ---                                                                                           | N/A | N/A |
| 10510602 | 9230110K08Rik                                                                                 | N/A | N/A |
| 10510604 | Dnajc11                                                                                       | N/A | N/A |
| 10510624 | Klh21                                                                                         | N/A | N/A |
| 10510629 | Nol9                                                                                          | N/A | N/A |
| 10510687 | Acot7                                                                                         | N/A | N/A |
| 10510700 | Gpr153                                                                                        | N/A | N/A |
| 10510720 | Rpl22                                                                                         | N/A | N/A |
| 10510725 | Chd5                                                                                          | N/A | N/A |
| 10510809 | A430005L14Rik                                                                                 | N/A | N/A |
| 10510814 | BC046331                                                                                      | N/A | N/A |
| 10510836 | Lrrc47 /// 1190007F08Rik                                                                      | N/A | N/A |
| 10510844 | Wdr8                                                                                          | N/A | N/A |
| 10510859 | Megf6                                                                                         | N/A | N/A |
| 10510861 | Megf6                                                                                         | N/A | N/A |
| 10510872 | ---                                                                                           | N/A | N/A |
| 10510874 | Megf6                                                                                         | N/A | N/A |
| 10510876 | Megf6                                                                                         | N/A | N/A |
| 10510878 | Megf6                                                                                         | N/A | N/A |
| 10510880 | Megf6                                                                                         | N/A | N/A |
| 10510882 | Megf6                                                                                         | N/A | N/A |
| 10510884 | Megf6                                                                                         | N/A | N/A |
| 10510908 | ---                                                                                           | N/A | N/A |
| 10510910 | Prdm16                                                                                        | N/A | N/A |
| 10510957 | Pank4                                                                                         | N/A | N/A |
| 10510980 | ---                                                                                           | N/A | N/A |
| 10511007 | 2610002J02Rik                                                                                 | N/A | N/A |
| 10511014 | ---                                                                                           | N/A | N/A |
| 10511017 | 2010015L04Rik                                                                                 | N/A | N/A |
| 10511069 | Gnb1                                                                                          | N/A | N/A |
| 10511084 | Nadk                                                                                          | N/A | N/A |
| 10511099 | Slc35e2                                                                                       | N/A | N/A |

|          |                                |     |     |
|----------|--------------------------------|-----|-----|
| 10511113 | Cdk11b                         | N/A | N/A |
| 10511136 | B930041F14Rik                  | N/A | N/A |
| 10511139 | Ssu72                          | N/A | N/A |
| 10511146 | 2610204G22Rik                  | N/A | N/A |
| 10511149 | Mrpl20                         | N/A | N/A |
| 10511175 | Aurkaip1                       | N/A | N/A |
| 10511180 | Mxra8                          | N/A | N/A |
| 10511190 | Dvl1                           | N/A | N/A |
| 10511207 | Cpsf3l /// Pusl1               | N/A | N/A |
| 10511226 | Acap3                          | N/A | N/A |
| 10511252 | Ube2j2                         | N/A | N/A |
| 10511269 | Sdf4                           | N/A | N/A |
| 10511290 | Tnfrsf18                       | N/A | N/A |
| 10511298 | 9430015G10Rik                  | N/A | N/A |
| 10511309 | 9930005F22Rik /// LOC100045778 | N/A | N/A |
| 10511311 | Tmem68                         | N/A | N/A |
| 10511325 | Rps20                          | N/A | N/A |
| 10511333 | Plag1                          | N/A | N/A |
| 10511342 | Uba52 /// Gm5239 /// Gm7866    | N/A | N/A |
| 10511363 | Penk                           | N/A | N/A |
| 10511366 | ---                            | N/A | N/A |
| 10511375 | Cyp7a1                         | N/A | N/A |
| 10511382 | Nsmaf                          | N/A | N/A |
| 10511414 | ---                            | N/A | N/A |
| 10511416 | Tox                            | N/A | N/A |
| 10511429 | Car8                           | N/A | N/A |
| 10511442 | ---                            | N/A | N/A |
| 10511444 | Gm11810                        | N/A | N/A |
| 10511484 | ---                            | N/A | N/A |
| 10511490 | ---                            | N/A | N/A |
| 10511496 | ---                            | N/A | N/A |
| 10511498 | Plekhf2                        | N/A | N/A |
| 10511510 | Ints8                          | N/A | N/A |
| 10511541 | Dpy19l4                        | N/A | N/A |
| 10511580 | Pdp1                           | N/A | N/A |
| 10511586 | Gm10604                        | N/A | N/A |
| 10511588 | Tmem67                         | N/A | N/A |
| 10511617 | Fam92a                         | N/A | N/A |
| 10511629 | Rpl26 /// Gm10136 /// Gm15772  | N/A | N/A |
| 10511661 | Otud6b                         | N/A | N/A |
| 10511665 | Necab1                         | N/A | N/A |
| 10511679 | Decr1                          | N/A | N/A |
| 10511692 | Nbn                            | N/A | N/A |
| 10511694 | Osgin2                         | N/A | N/A |
| 10511719 | ---                            | N/A | N/A |
| 10511721 | ---                            | N/A | N/A |
| 10511723 | ---                            | N/A | N/A |
| 10511725 | Cyb5r4                         | N/A | N/A |
| 10511739 | Cpne3                          | N/A | N/A |
| 10511779 | Atp6v0d2                       | N/A | N/A |
| 10511789 | Nkain3                         | N/A | N/A |
| 10511803 | 2610029l0lRik                  | N/A | N/A |
| 10511808 | Sfrs18 /// 4930528A17Rik       | N/A | N/A |
| 10511810 | Pou3f2                         | N/A | N/A |
| 10511812 | Pou3f2                         | N/A | N/A |
| 10511814 | ---                            | N/A | N/A |
| 10511817 | Klh32                          | N/A | N/A |
| 10511819 | Klh32                          | N/A | N/A |
| 10511843 | 1810074P20Rik                  | N/A | N/A |
| 10511865 | Ptges3                         | N/A | N/A |
| 10511868 | ---                            | N/A | N/A |
| 10511870 | Fut9                           | N/A | N/A |
| 10511877 | ---                            | N/A | N/A |
| 10511879 | ---                            | N/A | N/A |
| 10511881 | Manea                          | N/A | N/A |
| 10511886 | Bhmt                           | N/A | N/A |
| 10511888 | ---                            | N/A | N/A |
| 10511890 | ---                            | N/A | N/A |
| 10511892 | ---                            | N/A | N/A |
| 10511894 | ---                            | N/A | N/A |
| 10511896 | BC024582                       | N/A | N/A |
| 10511950 | ---                            | N/A | N/A |
| 10511952 | Orc3                           | N/A | N/A |
| 10511975 | Slc35a1                        | N/A | N/A |
| 10511984 | 1700003M02Rik                  | N/A | N/A |
| 10512011 | Zfp292                         | N/A | N/A |
| 10512022 | Mobkl2b                        | N/A | N/A |
| 10512024 | Mobkl2b                        | N/A | N/A |
| 10512030 | 3110043O21Rik                  | N/A | N/A |
| 10512044 | Lingo2                         | N/A | N/A |
| 10512057 | ---                            | N/A | N/A |
| 10512059 | Lingo2                         | N/A | N/A |
| 10512061 | Taf9                           | N/A | N/A |
| 10512063 | ---                            | N/A | N/A |



|          |                                                                        |     |     |
|----------|------------------------------------------------------------------------|-----|-----|
| 10512065 | ---                                                                    | N/A | N/A |
| 10512067 | Ddx58                                                                  | N/A | N/A |
| 10512088 | Topors                                                                 | N/A | N/A |
| 10512093 | Ndufb6                                                                 | N/A | N/A |
| 10512098 | Aptx                                                                   | N/A | N/A |
| 10512111 | Smu1                                                                   | N/A | N/A |
| 10512125 | Psenen                                                                 | N/A | N/A |
| 10512129 | B4galt1                                                                | N/A | N/A |
| 10512136 | Bag1                                                                   | N/A | N/A |
| 10512165 | Nol6                                                                   | N/A | N/A |
| 10512195 | Ubap2                                                                  | N/A | N/A |
| 10512226 | Dcaf12                                                                 | N/A | N/A |
| 10512254 | 1110017D15Rik                                                          | N/A | N/A |
| 10512265 | 2310028H24Rik                                                          | N/A | N/A |
| 10512274 | Enho                                                                   | N/A | N/A |
| 10512279 | Cntfr                                                                  | N/A | N/A |
| 10512291 | Dctn3                                                                  | N/A | N/A |
| 10512308 | Sigmar1                                                                | N/A | N/A |
| 10512315 | Ccl27a /// Gm13306                                                     | N/A | N/A |
| 10512322 | Ccl19 /// Gm13309 /// Gm2442 /// LOC100043921                          | N/A | N/A |
| 10512327 | 4933409K07Rik /// Gm7819 /// Gm13308 /// Gm3893 /// Ccl27a /// Gm10590 | N/A | N/A |
| 10512332 | 4930466F19Rik                                                          | N/A | N/A |
| 10512350 | 4933409K07Rik /// Gm10590                                              | N/A | N/A |
| 10512352 | 4933409K07Rik /// Gm10590                                              | N/A | N/A |
| 10512354 | 4930466F19Rik                                                          | N/A | N/A |
| 10512372 | Ccl19 /// Gm13309 /// Gm2442 /// LOC100043921                          | N/A | N/A |
| 10512377 | Ccl21c /// Gm10591 /// Ccl21b /// Gm13304 /// Ccl21a /// Gm1987        | N/A | N/A |
| 10512384 | BC049635                                                               | N/A | N/A |
| 10512391 | Vcp                                                                    | N/A | N/A |
| 10512431 | Pigo                                                                   | N/A | N/A |
| 10512443 | Stoml2                                                                 | N/A | N/A |
| 10512463 | LOC280487                                                              | N/A | N/A |
| 10512487 | Rmrp                                                                   | N/A | N/A |
| 10512514 | Tln1                                                                   | N/A | N/A |
| 10512574 | Gba2                                                                   | N/A | N/A |
| 10512594 | Rgp1 /// Msmmp                                                         | N/A | N/A |
| 10512626 | Olf71                                                                  | N/A | N/A |
| 10512628 | Olf159                                                                 | N/A | N/A |
| 10512630 | Olf155                                                                 | N/A | N/A |
| 10512637 | Olf157                                                                 | N/A | N/A |
| 10512640 | Gne                                                                    | N/A | N/A |
| 10512653 | ---                                                                    | N/A | N/A |
| 10512655 | Rnf38                                                                  | N/A | N/A |
| 10512680 | Aurkc                                                                  | N/A | N/A |
| 10512688 | Fbxo10                                                                 | N/A | N/A |
| 10512704 | Exosc3                                                                 | N/A | N/A |
| 10512714 | Shb                                                                    | N/A | N/A |
| 10512728 | Tstd2 /// Tmod1                                                        | N/A | N/A |
| 10512739 | Xpa /// Ncbp1                                                          | N/A | N/A |
| 10512766 | Trim14                                                                 | N/A | N/A |
| 10512807 | Gabbr2                                                                 | N/A | N/A |
| 10512827 | Gm568                                                                  | N/A | N/A |
| 10512830 | Anks6                                                                  | N/A | N/A |
| 10512847 | Alg2                                                                   | N/A | N/A |
| 10512851 | Erp44                                                                  | N/A | N/A |
| 10512867 | Tex10 /// Invs                                                         | N/A | N/A |
| 10512884 | ---                                                                    | N/A | N/A |
| 10512892 | Acnat1                                                                 | N/A | N/A |
| 10512901 | Mrpl50                                                                 | N/A | N/A |
| 10512904 | Aldob                                                                  | N/A | N/A |
| 10512919 | Grin3a                                                                 | N/A | N/A |
| 10512937 | Rnu1b1 /// Rnu1b6 /// Rnu1b2                                           | N/A | N/A |
| 10512939 | 2610030H06Rik                                                          | N/A | N/A |
| 10512945 | Olf272                                                                 | N/A | N/A |
| 10512947 | ---                                                                    | N/A | N/A |
| 10512949 | Abca1                                                                  | N/A | N/A |
| 10513002 | Gm12471                                                                | N/A | N/A |
| 10513004 | Gm10588                                                                | N/A | N/A |
| 10513006 | ---                                                                    | N/A | N/A |
| 10513020 | lkbkap                                                                 | N/A | N/A |
| 10513061 | Cttnal1                                                                | N/A | N/A |
| 10513082 | D730040F13Rik                                                          | N/A | N/A |
| 10513101 | Mir32                                                                  | N/A | N/A |
| 10513103 | 6430704M03Rik                                                          | N/A | N/A |
| 10513139 | Ptpn3                                                                  | N/A | N/A |
| 10513141 | Ptpn3                                                                  | N/A | N/A |
| 10513143 | Ptpn3                                                                  | N/A | N/A |
| 10513145 | Ptpn3                                                                  | N/A | N/A |
| 10513152 | Ptpn3                                                                  | N/A | N/A |
| 10513154 | Ptpn3                                                                  | N/A | N/A |
| 10513156 | Ptpn3                                                                  | N/A | N/A |
| 10513158 | Ptpn3                                                                  | N/A | N/A |
| 10513160 | Ptpn3                                                                  | N/A | N/A |
| 10513162 | Ptpn3                                                                  | N/A | N/A |

|          |                                                                                                                   |     |     |
|----------|-------------------------------------------------------------------------------------------------------------------|-----|-----|
| 10513164 | Ptpn3                                                                                                             | N/A | N/A |
| 10513181 | Gapdh /// Gm16374 /// Gm2606 /// Gm4609 /// Gm3200 /// Gm2451 /// Gm10293                                         | N/A | N/A |
| 10513186 | Gm12538                                                                                                           | N/A | N/A |
| 10513188 | ---                                                                                                               | N/A | N/A |
| 10513190 | D630039A03Rik                                                                                                     | N/A | N/A |
| 10513266 | Olf267                                                                                                            | N/A | N/A |
| 10513268 | A1314180                                                                                                          | N/A | N/A |
| 10513360 | ---                                                                                                               | N/A | N/A |
| 10513362 | Susd1                                                                                                             | N/A | N/A |
| 10513381 | Rod1                                                                                                              | N/A | N/A |
| 10513404 | ---                                                                                                               | N/A | N/A |
| 10513420 | Mup7                                                                                                              | N/A | N/A |
| 10513428 | Mup7                                                                                                              | N/A | N/A |
| 10513437 | Mup1                                                                                                              | N/A | N/A |
| 10513455 | Mup7                                                                                                              | N/A | N/A |
| 10513467 | Mup3 /                                                                                                            | N/A | N/A |
| 10513472 | Mup7                                                                                                              | N/A | N/A |
| 10513497 | Mup1                                                                                                              | N/A | N/A |
| 10513504 | Mup1                                                                                                              | N/A | N/A |
| 10513512 | up1 /// Mup7 /// Mup10 /// Mup19 /// Mup2 /// LOC100048884 /// Mup9 /// LOC100048885 /// Mup11 /// Mup12 /// Mup1 | N/A | N/A |
| 10513521 | Mup20                                                                                                             | N/A | N/A |
| 10513529 | Mup3                                                                                                              | N/A | N/A |
| 10513536 | ---                                                                                                               | N/A | N/A |
| 10513538 | Mup21                                                                                                             | N/A | N/A |
| 10513544 | Zfp37                                                                                                             | N/A | N/A |
| 10513551 | Fkbp15                                                                                                            | N/A | N/A |
| 10513583 | Cdc26                                                                                                             | N/A | N/A |
| 10513592 | Wdr31                                                                                                             | N/A | N/A |
| 10513622 | Pole3                                                                                                             | N/A | N/A |
| 10513630 | Ambp                                                                                                              | N/A | N/A |
| 10513692 | Whrn                                                                                                              | N/A | N/A |
| 10513737 | Rpl17 /// Gm10268 /// Rpl17-ps3                                                                                   | N/A | N/A |
| 10513774 | ---                                                                                                               | N/A | N/A |
| 10513776 | Astn2                                                                                                             | N/A | N/A |
| 10513803 | ---                                                                                                               | N/A | N/A |
| 10513805 | Dbc1                                                                                                              | N/A | N/A |
| 10513818 | Stmn1                                                                                                             | N/A | N/A |
| 10513822 | ---                                                                                                               | N/A | N/A |
| 10513867 | ---                                                                                                               | N/A | N/A |
| 10513869 | Megf9                                                                                                             | N/A | N/A |
| 10513878 | Rps18 /// Gm10260                                                                                                 | N/A | N/A |
| 10513884 | Tle1                                                                                                              | N/A | N/A |
| 10513912 | Aldoart1                                                                                                          | N/A | N/A |
| 10513952 | 3110001D03Rik                                                                                                     | N/A | N/A |
| 10513955 | ---                                                                                                               | N/A | N/A |
| 10513957 | Ptprd                                                                                                             | N/A | N/A |
| 10514000 | Mpdz                                                                                                              | N/A | N/A |
| 10514047 | ---                                                                                                               | N/A | N/A |
| 10514049 | Nfib                                                                                                              | N/A | N/A |
| 10514054 | Nfib                                                                                                              | N/A | N/A |
| 10514072 | Zdhhc21                                                                                                           | N/A | N/A |
| 10514128 | Ttc39b                                                                                                            | N/A | N/A |
| 10514133 | Ttc39b                                                                                                            | N/A | N/A |
| 10514158 | Psip1                                                                                                             | N/A | N/A |
| 10514173 | Rpl34 /// Gm6404 /// Gm10154                                                                                      | N/A | N/A |
| 10514175 | ---                                                                                                               | N/A | N/A |
| 10514193 | ---                                                                                                               | N/A | N/A |
| 10514201 | Haus6                                                                                                             | N/A | N/A |
| 10514219 | Scarna8                                                                                                           | N/A | N/A |
| 10514233 | Rps6 /// Gm16409                                                                                                  | N/A | N/A |
| 10514240 | Slc24a2                                                                                                           | N/A | N/A |
| 10514255 | Mlt3                                                                                                              | N/A | N/A |
| 10514289 | Ifna12                                                                                                            | N/A | N/A |
| 10514296 | Ifna9                                                                                                             | N/A | N/A |
| 10514298 | Mrpl48                                                                                                            | N/A | N/A |
| 10514313 | Gm13280                                                                                                           | N/A | N/A |
| 10514315 | Ifna2                                                                                                             | N/A | N/A |
| 10514317 | Ifnab                                                                                                             | N/A | N/A |
| 10514319 | Klhl9                                                                                                             | N/A | N/A |
| 10514323 | LOC100037413                                                                                                      | N/A | N/A |
| 10514325 | Gm13290 /// Gm13275 /// Ifnz                                                                                      | N/A | N/A |
| 10514327 | Gm13290 /// Gm13275 /// Ifnz                                                                                      | N/A | N/A |
| 10514329 | Gm13290 /// Gm13275 /// Ifnz                                                                                      | N/A | N/A |
| 10514331 | Gm13290 /// Gm13275 /// Ifnz                                                                                      | N/A | N/A |
| 10514333 | 4930553M12Rik                                                                                                     | N/A | N/A |
| 10514338 | Mir31                                                                                                             | N/A | N/A |
| 10514347 | Cdkn2b                                                                                                            | N/A | N/A |
| 10514350 | ---                                                                                                               | N/A | N/A |
| 10514352 | Elavl2                                                                                                            | N/A | N/A |
| 10514368 | Gapdh /// Gm12070 /// Gm16374 /// Gm2606 /// Gm4609 /// Gm3200 /// Gm2451 /// Gm10293                             | N/A | N/A |
| 10514374 | ---                                                                                                               | N/A | N/A |
| 10514383 | Larp7                                                                                                             | N/A | N/A |
| 10514390 | ---                                                                                                               | N/A | N/A |
| 10514392 | Tusc1                                                                                                             | N/A | N/A |

|          |                                          |     |     |
|----------|------------------------------------------|-----|-----|
| 10514396 | ---                                      | N/A | N/A |
| 10514398 | 5830433M19Rik /// Gm10306                | N/A | N/A |
| 10514405 | Plaa                                     | N/A | N/A |
| 10514441 | Mysm1                                    | N/A | N/A |
| 10514461 | ---                                      | N/A | N/A |
| 10514464 | ---                                      | N/A | N/A |
| 10514466 | Jun                                      | N/A | N/A |
| 10514473 | ---                                      | N/A | N/A |
| 10514475 | Hook1                                    | N/A | N/A |
| 10514491 | Cyp2j12-ps                               | N/A | N/A |
| 10514510 | Cyp2j6                                   | N/A | N/A |
| 10514520 | Cyp2j9                                   | N/A | N/A |
| 10514532 | Cyp2j5                                   | N/A | N/A |
| 10514556 | Gm10192                                  | N/A | N/A |
| 10514558 | ---                                      | N/A | N/A |
| 10514568 | Tm2d1                                    | N/A | N/A |
| 10514576 | Kank4                                    | N/A | N/A |
| 10514590 | Dock7                                    | N/A | N/A |
| 10514645 | ---                                      | N/A | N/A |
| 10514647 | ---                                      | N/A | N/A |
| 10514658 | Ccdc50                                   | N/A | N/A |
| 10514662 | Gm10577                                  | N/A | N/A |
| 10514664 | Gm10576                                  | N/A | N/A |
| 10514668 | Jak1                                     | N/A | N/A |
| 10514697 | Mir101a                                  | N/A | N/A |
| 10514706 | ---                                      | N/A | N/A |
| 10514713 | Wdr78                                    | N/A | N/A |
| 10514732 | Slc35d1                                  | N/A | N/A |
| 10514763 | C8a                                      | N/A | N/A |
| 10514779 | Prkaa2                                   | N/A | N/A |
| 10514789 | ---                                      | N/A | N/A |
| 10514791 | Pcsk9                                    | N/A | N/A |
| 10514815 | ---                                      | N/A | N/A |
| 10514830 | Ttc4                                     | N/A | N/A |
| 10514865 | Acot11                                   | N/A | N/A |
| 10514884 | Mrpl37                                   | N/A | N/A |
| 10514892 | 2210012G02Rik                            | N/A | N/A |
| 10514896 | 2210012G02Rik                            | N/A | N/A |
| 10514902 | Lrrc42                                   | N/A | N/A |
| 10514912 | Dio1                                     | N/A | N/A |
| 10514924 | Tomm22                                   | N/A | N/A |
| 10514926 | B230314M03Rik                            | N/A | N/A |
| 10514933 | Cpt2                                     | N/A | N/A |
| 10514956 | Scp2                                     | N/A | N/A |
| 10514971 | Zyg11a                                   | N/A | N/A |
| 10514985 | Zyg11b                                   | N/A | N/A |
| 10515003 | Fam159a                                  | N/A | N/A |
| 10515012 | Prpf38a                                  | N/A | N/A |
| 10515026 | Cc2d1b                                   | N/A | N/A |
| 10515028 | Zfyve9                                   | N/A | N/A |
| 10515046 | Btf3l4                                   | N/A | N/A |
| 10515049 | Kti12                                    | N/A | N/A |
| 10515051 | Osbpl9                                   | N/A | N/A |
| 10515086 | ---                                      | N/A | N/A |
| 10515113 | Hnrrnpa3                                 | N/A | N/A |
| 10515132 | ---                                      | N/A | N/A |
| 10515142 | ---                                      | N/A | N/A |
| 10515154 | Rpl3                                     | N/A | N/A |
| 10515156 | Minpp1                                   | N/A | N/A |
| 10515164 | Cmpk1                                    | N/A | N/A |
| 10515168 | Cyp4x1                                   | N/A | N/A |
| 10515187 | Cyp4a14                                  | N/A | N/A |
| 10515211 | 4930544O15Rik                            | N/A | N/A |
| 10515220 | Faah                                     | N/A | N/A |
| 10515253 | Uqcrh                                    | N/A | N/A |
| 10515277 | 1520402A15Rik /// Pomgnt1                | N/A | N/A |
| 10515280 | ---                                      | N/A | N/A |
| 10515293 | lph                                      | N/A | N/A |
| 10515295 | Mast2                                    | N/A | N/A |
| 10515326 | Tmem69                                   | N/A | N/A |
| 10515335 | Ccdc17 /// C530005A16Rik                 | N/A | N/A |
| 10515337 | Nasp                                     | N/A | N/A |
| 10515363 | Mmachc                                   | N/A | N/A |
| 10515378 | Hpdl                                     | N/A | N/A |
| 10515383 | Rpl36 /// Gm13611 /// Gm5745             | N/A | N/A |
| 10515396 | Btbd19                                   | N/A | N/A |
| 10515399 | PLK3                                     | N/A | N/A |
| 10515416 | Rps8 /// Gm5121 /// Gm11353 /// Rps8-ps1 | N/A | N/A |
| 10515423 | ---                                      | N/A | N/A |
| 10515425 | Snord38a                                 | N/A | N/A |
| 10515427 | ---                                      | N/A | N/A |
| 10515429 | Snord55                                  | N/A | N/A |
| 10515452 | Gm1661                                   | N/A | N/A |
| 10515461 | Rnf220                                   | N/A | N/A |

|          |                         |     |     |
|----------|-------------------------|-----|-----|
| 10515481 | Dmap1                   | N/A | N/A |
| 10515493 | Rhoa                    | N/A | N/A |
| 10515519 | Atp6v0b                 | N/A | N/A |
| 10515528 | Dph2                    | N/A | N/A |
| 10515536 | lpo13                   | N/A | N/A |
| 10515574 | St3gal3                 | N/A | N/A |
| 10515613 | Ptprf                   | N/A | N/A |
| 10515688 | Szt2                    | N/A | N/A |
| 10515690 | Szt2                    | N/A | N/A |
| 10515692 | Szt2                    | N/A | N/A |
| 10515694 | Szt2                    | N/A | N/A |
| 10515696 | Szt2                    | N/A | N/A |
| 10515698 | Szt2                    | N/A | N/A |
| 10515704 | Szt2                    | N/A | N/A |
| 10515706 | Szt2                    | N/A | N/A |
| 10515708 | Szt2                    | N/A | N/A |
| 10515710 | Szt2                    | N/A | N/A |
| 10515712 | Szt2                    | N/A | N/A |
| 10515714 | Szt2                    | N/A | N/A |
| 10515716 | Szt2                    | N/A | N/A |
| 10515729 | Szt2                    | N/A | N/A |
| 10515731 | Szt2                    | N/A | N/A |
| 10515733 | Szt2                    | N/A | N/A |
| 10515735 | Szt2                    | N/A | N/A |
| 10515737 | Szt2                    | N/A | N/A |
| 10515771 | Tie1                    | N/A | N/A |
| 10515803 | Wdr65                   | N/A | N/A |
| 10515822 | Olfr1342                | N/A | N/A |
| 10515824 | Olfr1338                | N/A | N/A |
| 10515826 | Olfr1328                | N/A | N/A |
| 10515828 | Olfr1328 /// Olfr1335   | N/A | N/A |
| 10515830 | Olfr1333                | N/A | N/A |
| 10515832 | Olfr1329                | N/A | N/A |
| 10515834 | Olfr1328                | N/A | N/A |
| 10515839 | ---                     | N/A | N/A |
| 10515844 | Zfp691                  | N/A | N/A |
| 10515861 | 4930538K18Rik           | N/A | N/A |
| 10515870 | AU022252                | N/A | N/A |
| 10515878 | Ybx1                    | N/A | N/A |
| 10515884 | Ppih /// Gm10069        | N/A | N/A |
| 10515924 | Rimkla                  | N/A | N/A |
| 10515930 | AA415398                | N/A | N/A |
| 10515943 | Ctps                    | N/A | N/A |
| 10515979 | Mir30c-1                | N/A | N/A |
| 10515981 | Mir30e                  | N/A | N/A |
| 10515983 | Dem1                    | N/A | N/A |
| 10515994 | Smap2                   | N/A | N/A |
| 10516007 | Zmpste24                | N/A | N/A |
| 10516020 | ---                     | N/A | N/A |
| 10516022 | ---                     | N/A | N/A |
| 10516024 | Tmco2                   | N/A | N/A |
| 10516027 | Rlf                     | N/A | N/A |
| 10516051 | Cap1                    | N/A | N/A |
| 10516079 | Oxct2b                  | N/A | N/A |
| 10516101 | Oxct2a                  | N/A | N/A |
| 10516103 | Macf1                   | N/A | N/A |
| 10516209 | Rps2                    | N/A | N/A |
| 10516211 | Ndufs5                  | N/A | N/A |
| 10516219 | Gm10572                 | N/A | N/A |
| 10516221 | ---                     | N/A | N/A |
| 10516225 | Rragc /// 4930535I16Rik | N/A | N/A |
| 10516227 | 3100002H09Rik           | N/A | N/A |
| 10516229 | Utp11l                  | N/A | N/A |
| 10516238 | 1110065P20Rik           | N/A | N/A |
| 10516241 | Maneal                  | N/A | N/A |
| 10516259 | Dnali1                  | N/A | N/A |
| 10516275 | Rpl28                   | N/A | N/A |
| 10516296 | Thrap3                  | N/A | N/A |
| 10516303 | ---                     | N/A | N/A |
| 10516305 | Mtap7d1                 | N/A | N/A |
| 10516325 | Adprhl2                 | N/A | N/A |
| 10516335 | Tekt2                   | N/A | N/A |
| 10516348 | Eif2c3                  | N/A | N/A |
| 10516371 | Eif2c1                  | N/A | N/A |
| 10516393 | Eif2c4                  | N/A | N/A |
| 10516427 | Ncdn                    | N/A | N/A |
| 10516435 | Zmym4                   | N/A | N/A |
| 10516466 | Zmym1                   | N/A | N/A |
| 10516479 | Rps28                   | N/A | N/A |
| 10516481 | Gja4                    | N/A | N/A |
| 10516495 | CK137956                | N/A | N/A |
| 10516507 | Zscan20                 | N/A | N/A |
| 10516518 | Tlr12                   | N/A | N/A |
| 10516520 | Zfp362                  | N/A | N/A |

|          |                     |     |     |
|----------|---------------------|-----|-----|
| 10516529 | Adc                 | N/A | N/A |
| 10516544 | Hpca                | N/A | N/A |
| 10516551 | S100pbp             | N/A | N/A |
| 10516576 | Rbbp4 /// Sync      | N/A | N/A |
| 10516590 | Zbtb8a              | N/A | N/A |
| 10516602 | Tssk3               | N/A | N/A |
| 10516605 | Hdac1               | N/A | N/A |
| 10516637 | Fam167b             | N/A | N/A |
| 10516640 | Eif3i               | N/A | N/A |
| 10516652 | Igcc                | N/A | N/A |
| 10516666 | Txlna               | N/A | N/A |
| 10516695 | Tmem39b             | N/A | N/A |
| 10516706 | Khdrbs1             | N/A | N/A |
| 10516721 | ---                 | N/A | N/A |
| 10516723 | Hcrtr1              | N/A | N/A |
| 10516735 | Tinagl1             | N/A | N/A |
| 10516765 | Serinc2             | N/A | N/A |
| 10516776 | Gm10570 /// Fabp3   | N/A | N/A |
| 10516778 | Zcchc17             | N/A | N/A |
| 10516823 | Epb4.1              | N/A | N/A |
| 10516859 | Ythdf2              | N/A | N/A |
| 10516867 | Gmeb1               | N/A | N/A |
| 10516906 | Snora73b            | N/A | N/A |
| 10516908 | Snora73a            | N/A | N/A |
| 10516910 | Phactr4             | N/A | N/A |
| 10516956 | Smpdl3b             | N/A | N/A |
| 10516966 | BC013712            | N/A | N/A |
| 10516982 | Stx12               | N/A | N/A |
| 10517005 | Gpr3                | N/A | N/A |
| 10517028 | Tmem222             | N/A | N/A |
| 10517036 | Wdtdc1              | N/A | N/A |
| 10517053 | Trnp1               | N/A | N/A |
| 10517058 | 1810019J16Rik       | N/A | N/A |
| 10517067 | Sfn                 | N/A | N/A |
| 10517070 | Zdhhc18             | N/A | N/A |
| 10517083 | Pigv                | N/A | N/A |
| 10517090 | Arid1a              | N/A | N/A |
| 10517114 | ---                 | N/A | N/A |
| 10517141 | Hmgn2 /// Gm6724    | N/A | N/A |
| 10517147 | Dhdds               | N/A | N/A |
| 10517165 | Cd52                | N/A | N/A |
| 10517169 | Sh3bgrl3            | N/A | N/A |
| 10517236 | Zfp593              | N/A | N/A |
| 10517240 | Grrp1               | N/A | N/A |
| 10517250 | Ext1                | N/A | N/A |
| 10517263 | Fam54b              | N/A | N/A |
| 10517274 | Sepr1               | N/A | N/A |
| 10517301 | Ldlrap1             | N/A | N/A |
| 10517328 | Tmem50a             | N/A | N/A |
| 10517336 | Clic4               | N/A | N/A |
| 10517343 | ---                 | N/A | N/A |
| 10517345 | Srrm1               | N/A | N/A |
| 10517371 | ---                 | N/A | N/A |
| 10517373 | Rcan3 /// Mir700    | N/A | N/A |
| 10517383 | Nipal3              | N/A | N/A |
| 10517419 | ---                 | N/A | N/A |
| 10517436 | 1110049F12Rik       | N/A | N/A |
| 10517443 | Tceb3               | N/A | N/A |
| 10517463 | Luzp1               | N/A | N/A |
| 10517465 | Kdm1a               | N/A | N/A |
| 10517486 | ---                 | N/A | N/A |
| 10517508 | C1qb                | N/A | N/A |
| 10517513 | C1qc                | N/A | N/A |
| 10517517 | C1qa                | N/A | N/A |
| 10517540 | Zbtb40              | N/A | N/A |
| 10517559 | Cdc42               | N/A | N/A |
| 10517566 | ---                 | N/A | N/A |
| 10517587 | Alpl                | N/A | N/A |
| 10517600 | Pink1               | N/A | N/A |
| 10517609 | Cda                 | N/A | N/A |
| 10517614 | Fam43b /// AB041806 | N/A | N/A |
| 10517616 | Vwa5b1              | N/A | N/A |
| 10517664 | ---                 | N/A | N/A |
| 10517673 | Htr6                | N/A | N/A |
| 10517677 | Nbl1                | N/A | N/A |
| 10517682 | 2310028O11Rik       | N/A | N/A |
| 10517687 | Gm16287             | N/A | N/A |
| 10517689 | Pqlc2               | N/A | N/A |
| 10517706 | Mrto4               | N/A | N/A |
| 10517727 | Klhdc7a             | N/A | N/A |
| 10517731 | Igsf21              | N/A | N/A |
| 10517742 | Gm9867              | N/A | N/A |
| 10517892 | D4Ertld22e          | N/A | N/A |
| 10517899 | C630004L07Rik       | N/A | N/A |

|          |                                                                          |     |     |
|----------|--------------------------------------------------------------------------|-----|-----|
| 10517948 | Spen                                                                     | N/A | N/A |
| 10517996 | Plekhm2                                                                  | N/A | N/A |
| 10518019 | Ddi2 /// Rsc1a1                                                          | N/A | N/A |
| 10518031 | Dnajc16                                                                  | N/A | N/A |
| 10518075 | Fhad1                                                                    | N/A | N/A |
| 10518132 | Prdm2                                                                    | N/A | N/A |
| 10518145 | Prdm2                                                                    | N/A | N/A |
| 10518147 | Pdpm                                                                     | N/A | N/A |
| 10518163 | ---                                                                      | N/A | N/A |
| 10518167 | Trappc2                                                                  | N/A | N/A |
| 10518207 | ---                                                                      | N/A | N/A |
| 10518216 | Gm9944                                                                   | N/A | N/A |
| 10518224 | Gm13178                                                                  | N/A | N/A |
| 10518226 | Vps13d                                                                   | N/A | N/A |
| 10518228 | Vps13d                                                                   | N/A | N/A |
| 10518300 | Tnfrsf1b                                                                 | N/A | N/A |
| 10518327 | ---                                                                      | N/A | N/A |
| 10518329 | Rpl28                                                                    | N/A | N/A |
| 10518331 | ---                                                                      | N/A | N/A |
| 10518333 | ---                                                                      | N/A | N/A |
| 10518335 | 1700029I01Rik /// Gm13251 /// Gm13139 /// Gm13151 /// Zfp534 /// Gm13235 | N/A | N/A |
| 10518341 | Ppp2r5a                                                                  | N/A | N/A |
| 10518344 | Cdv3 /// Gm13238                                                         | N/A | N/A |
| 10518346 | 1700029I01Rik /// Gm13251 /// Gm13139 /// Gm13051                        | N/A | N/A |
| 10518350 | Hmgb2                                                                    | N/A | N/A |
| 10518352 | Hmgb2                                                                    | N/A | N/A |
| 10518354 | ---                                                                      | N/A | N/A |
| 10518356 | Rpl29                                                                    | N/A | N/A |
| 10518358 | 2610305D13Rik                                                            | N/A | N/A |
| 10518361 | Smarca5 /// Vmn2r-ps14                                                   | N/A | N/A |
| 10518364 | Rps19-ps3                                                                | N/A | N/A |
| 10518366 | 2810408P10Rik                                                            | N/A | N/A |
| 10518385 | Mfn2                                                                     | N/A | N/A |
| 10518408 | Plod1                                                                    | N/A | N/A |
| 10518428 | Clcn6                                                                    | N/A | N/A |
| 10518453 | Chchd2                                                                   | N/A | N/A |
| 10518484 | Fbxo44                                                                   | N/A | N/A |
| 10518492 | Ptchd2                                                                   | N/A | N/A |
| 10518520 | Ubiad1                                                                   | N/A | N/A |
| 10518524 | Ubiad1                                                                   | N/A | N/A |
| 10518532 | Tardbp /// Masp2                                                         | N/A | N/A |
| 10518546 | Pex14                                                                    | N/A | N/A |
| 10518557 | Cort                                                                     | N/A | N/A |
| 10518568 | ---                                                                      | N/A | N/A |
| 10518570 | Pgd                                                                      | N/A | N/A |
| 10518585 | Kif1b                                                                    | N/A | N/A |
| 10518642 | Ube4b                                                                    | N/A | N/A |
| 10518714 | Tmem201                                                                  | N/A | N/A |
| 10518726 | Slc25a33                                                                 | N/A | N/A |
| 10518761 | ---                                                                      | N/A | N/A |
| 10518763 | Slc45a1                                                                  | N/A | N/A |
| 10518774 | Park7                                                                    | N/A | N/A |
| 10518805 | Vamp3                                                                    | N/A | N/A |
| 10518812 | Camta1                                                                   | N/A | N/A |
| 10518833 | Camta1                                                                   | N/A | N/A |
| 10518835 | Camta1                                                                   | N/A | N/A |
| 10518837 | Camta1                                                                   | N/A | N/A |
| 10518927 | Kcnab2                                                                   | N/A | N/A |
| 10518947 | Ajap1                                                                    | N/A | N/A |
| 10518955 | BC049688                                                                 | N/A | N/A |
| 10518967 | 1190007F08Rik                                                            | N/A | N/A |
| 10519007 | Tprgl                                                                    | N/A | N/A |
| 10519028 | Prdm16                                                                   | N/A | N/A |
| 10519046 | 5930403L14Rik                                                            | N/A | N/A |
| 10519052 | 2810405K02Rik                                                            | N/A | N/A |
| 10519060 | Tnfrsf14                                                                 | N/A | N/A |
| 10519096 | Rer1                                                                     | N/A | N/A |
| 10519105 | Ski                                                                      | N/A | N/A |
| 10519117 | Prkcz                                                                    | N/A | N/A |
| 10519136 | ---                                                                      | N/A | N/A |
| 10519138 | Gm10563                                                                  | N/A | N/A |
| 10519151 | Mib2                                                                     | N/A | N/A |
| 10519177 | ---                                                                      | N/A | N/A |
| 10519179 | 1500002C15Rik                                                            | N/A | N/A |
| 10519181 | ---                                                                      | N/A | N/A |
| 10519196 | Vwa1                                                                     | N/A | N/A |
| 10519203 | Tmem88b                                                                  | N/A | N/A |
| 10519207 | Ccnl2                                                                    | N/A | N/A |
| 10519209 | Mxra8 /// Gm10562                                                        | N/A | N/A |
| 10519211 | Tas1r3                                                                   | N/A | N/A |
| 10519219 | Gltpd1                                                                   | N/A | N/A |
| 10519224 | Pusl1                                                                    | N/A | N/A |
| 10519234 | B3galt6                                                                  | N/A | N/A |
| 10519239 | Gm10560                                                                  | N/A | N/A |

|          |                                            |     |     |
|----------|--------------------------------------------|-----|-----|
| 10519266 | Mir200a                                    | N/A | N/A |
| 10519268 | Mir200b                                    | N/A | N/A |
| 10519270 | Agrn                                       | N/A | N/A |
| 10519321 | Rpl26 /// Gm10136 /// Gm15772              | N/A | N/A |
| 10519324 | Cdk6                                       | N/A | N/A |
| 10519333 | Fam133b                                    | N/A | N/A |
| 10519344 | ---                                        | N/A | N/A |
| 10519346 | 1700109H08Rik /// C030048B08Rik            | N/A | N/A |
| 10519354 | Pex1 /// C030048B08Rik                     | N/A | N/A |
| 10519392 | Krit1                                      | N/A | N/A |
| 10519420 | Akap9                                      | N/A | N/A |
| 10519475 | ---                                        | N/A | N/A |
| 10519477 | ---                                        | N/A | N/A |
| 10519482 | Gm8773                                     | N/A | N/A |
| 10519484 | Steap2                                     | N/A | N/A |
| 10519486 | ---                                        | N/A | N/A |
| 10519488 | Tubb2c                                     | N/A | N/A |
| 10519495 | ---                                        | N/A | N/A |
| 10519497 | Steap4                                     | N/A | N/A |
| 10519504 | Sri                                        | N/A | N/A |
| 10519514 | ---                                        | N/A | N/A |
| 10519516 | Slc25a40                                   | N/A | N/A |
| 10519578 | Abcb4                                      | N/A | N/A |
| 10519607 | 4930420K17Rik                              | N/A | N/A |
| 10519612 | 9330182L06Rik                              | N/A | N/A |
| 10519640 | Gm10482                                    | N/A | N/A |
| 10519642 | ---                                        | N/A | N/A |
| 10519655 | ---                                        | N/A | N/A |
| 10519657 | ---                                        | N/A | N/A |
| 10519659 | ---                                        | N/A | N/A |
| 10519667 | ---                                        | N/A | N/A |
| 10519669 | ---                                        | N/A | N/A |
| 10519675 | ---                                        | N/A | N/A |
| 10519684 | ---                                        | N/A | N/A |
| 10519686 | ---                                        | N/A | N/A |
| 10519691 | ---                                        | N/A | N/A |
| 10519693 | Sema3d                                     | N/A | N/A |
| 10519711 | ---                                        | N/A | N/A |
| 10519717 | Sema3a                                     | N/A | N/A |
| 10519770 | Pclo                                       | N/A | N/A |
| 10519805 | Gm9758 /// Speer4e /// Speer4d /// Speer4c | N/A | N/A |
| 10519811 | Speer7-ps1 /// Speer8-ps1                  | N/A | N/A |
| 10519815 | Cacna2d1                                   | N/A | N/A |
| 10519855 | Cacna2d1                                   | N/A | N/A |
| 10519857 | Hgf                                        | N/A | N/A |
| 10519886 | Sema3c                                     | N/A | N/A |
| 10519913 | Magi2                                      | N/A | N/A |
| 10519940 | ---                                        | N/A | N/A |
| 10519942 | Magi2                                      | N/A | N/A |
| 10519945 | Tmem60                                     | N/A | N/A |
| 10519949 | A630072M18Rik                              | N/A | N/A |
| 10519983 | Fgl2                                       | N/A | N/A |
| 10519988 | Fam185a                                    | N/A | N/A |
| 10520010 | Pmpcb                                      | N/A | N/A |
| 10520025 | Psmc2                                      | N/A | N/A |
| 10520043 | Lhfp13                                     | N/A | N/A |
| 10520046 | LOC100503803                               | N/A | N/A |
| 10520048 | Mli5                                       | N/A | N/A |
| 10520080 | Rint1                                      | N/A | N/A |
| 10520096 | Klhl7                                      | N/A | N/A |
| 10520109 | ---                                        | N/A | N/A |
| 10520111 | Nupl2                                      | N/A | N/A |
| 10520121 | ---                                        | N/A | N/A |
| 10520124 | Sumo2                                      | N/A | N/A |
| 10520187 | Slc4a2                                     | N/A | N/A |
| 10520211 | Agap3                                      | N/A | N/A |
| 10520232 | ---                                        | N/A | N/A |
| 10520247 | 1700022A21Rik                              | N/A | N/A |
| 10520250 | Nub1                                       | N/A | N/A |
| 10520268 | 1500035N22Rik                              | N/A | N/A |
| 10520271 | 2900005J15Rik                              | N/A | N/A |
| 10520288 | Galnt11                                    | N/A | N/A |
| 10520301 | Cct8l1                                     | N/A | N/A |
| 10520304 | Actr3b                                     | N/A | N/A |
| 10520318 | Dpp6                                       | N/A | N/A |
| 10520351 | Dpp6                                       | N/A | N/A |
| 10520355 | Htr5a                                      | N/A | N/A |
| 10520360 | LOC100504484 /// LOC100503803              | N/A | N/A |
| 10520362 | Insig1                                     | N/A | N/A |
| 10520371 | Rbm33                                      | N/A | N/A |
| 10520379 | Rbm33                                      | N/A | N/A |
| 10520388 | Rbm33                                      | N/A | N/A |
| 10520390 | Gapdh /// Gm4609 /// Gm10290 /// Gm10291   | N/A | N/A |
| 10520392 | Rnf32                                      | N/A | N/A |

|          |                   |     |     |
|----------|-------------------|-----|-----|
| 10520419 | Ube3c             | N/A | N/A |
| 10520450 | Gm10469           | N/A | N/A |
| 10520459 | Fam59b            | N/A | N/A |
| 10520467 | Hadhb             | N/A | N/A |
| 10520499 | Gm1060            | N/A | N/A |
| 10520501 | 1700001C02Rik     | N/A | N/A |
| 10520506 | Kcnk3             | N/A | N/A |
| 10520513 | 4930471M23Rik     | N/A | N/A |
| 10520521 | Cenpa             | N/A | N/A |
| 10520527 | Dpysl5            | N/A | N/A |
| 10520544 | Mapre3            | N/A | N/A |
| 10520553 | Tmem214           | N/A | N/A |
| 10520612 | Khk               | N/A | N/A |
| 10520633 | Tcf23             | N/A | N/A |
| 10520648 | ---               | N/A | N/A |
| 10520696 | Gm9924            | N/A | N/A |
| 10520718 | Snx17             | N/A | N/A |
| 10520734 | Nrbp1             | N/A | N/A |
| 10520763 | Gckr              | N/A | N/A |
| 10520782 | Zfp512            | N/A | N/A |
| 10520815 | Slc4a1ap          | N/A | N/A |
| 10520833 | Mrpl33            | N/A | N/A |
| 10520842 | Bre               | N/A | N/A |
| 10520860 | ---               | N/A | N/A |
| 10520862 | Fosl2             | N/A | N/A |
| 10520867 | ---               | N/A | N/A |
| 10520940 | Plb1              | N/A | N/A |
| 10520942 | Plb1              | N/A | N/A |
| 10520944 | Plb1              | N/A | N/A |
| 10520946 | Plb1              | N/A | N/A |
| 10520948 | Plb1              | N/A | N/A |
| 10520950 | Pdlim1            | N/A | N/A |
| 10520952 | Ppp1cb            | N/A | N/A |
| 10520965 | Yes1 /// Gm10461  | N/A | N/A |
| 10520982 | Depdc5            | N/A | N/A |
| 10521031 | Ywhah             | N/A | N/A |
| 10521057 | Maea              | N/A | N/A |
| 10521085 | Gm9903            | N/A | N/A |
| 10521088 | Slbp /// Gm10459  | N/A | N/A |
| 10521111 | Fgfr3             | N/A | N/A |
| 10521134 | Rps29             | N/A | N/A |
| 10521136 | Whsc1             | N/A | N/A |
| 10521168 | Nat8l             | N/A | N/A |
| 10521174 | Rnf4              | N/A | N/A |
| 10521182 | Fam193a           | N/A | N/A |
| 10521222 | Add1              | N/A | N/A |
| 10521261 | Htt               | N/A | N/A |
| 10521331 | A930005I04Rik     | N/A | N/A |
| 10521337 | Rgs12             | N/A | N/A |
| 10521356 | Hgfac             | N/A | N/A |
| 10521383 | Adra2c            | N/A | N/A |
| 10521389 | ---               | N/A | N/A |
| 10521391 | Acox3             | N/A | N/A |
| 10521415 | Ablim2            | N/A | N/A |
| 10521440 | Afap1             | N/A | N/A |
| 10521459 | Psap1             | N/A | N/A |
| 10521461 | Grpel1            | N/A | N/A |
| 10521467 | Ccdc96            | N/A | N/A |
| 10521469 | Mrfap1            | N/A | N/A |
| 10521471 | Ppp2r2c           | N/A | N/A |
| 10521481 | Jakmip1           | N/A | N/A |
| 10521495 | Gm1043            | N/A | N/A |
| 10521498 | Crmp1             | N/A | N/A |
| 10521543 | Stx18             | N/A | N/A |
| 10521583 | Drd5              | N/A | N/A |
| 10521585 | ---               | N/A | N/A |
| 10521587 | Dnaja1            | N/A | N/A |
| 10521589 | Cir1              | N/A | N/A |
| 10521600 | ---               | N/A | N/A |
| 10521602 | Cpeb2             | N/A | N/A |
| 10521622 | ---               | N/A | N/A |
| 10521626 | Cc2d2a            | N/A | N/A |
| 10521690 | Pph /// Gm10069   | N/A | N/A |
| 10521693 | ---               | N/A | N/A |
| 10521696 | Prom1 /// Gm16401 | N/A | N/A |
| 10521698 | ---               | N/A | N/A |
| 10521700 | Gm10208           | N/A | N/A |
| 10521702 | 4930431F12Rik     | N/A | N/A |
| 10521705 | Clrn2             | N/A | N/A |
| 10521709 | Lap3              | N/A | N/A |
| 10521725 | Med28             | N/A | N/A |
| 10521755 | 4930449I04Rik     | N/A | N/A |
| 10521757 | ---               | N/A | N/A |
| 10521759 | Slit2             | N/A | N/A |



|          |                                                                             |     |     |
|----------|-----------------------------------------------------------------------------|-----|-----|
| 10521796 | Mir218-1                                                                    | N/A | N/A |
| 10521811 | ---                                                                         | N/A | N/A |
| 10521813 | Nsf1c                                                                       | N/A | N/A |
| 10521822 | ---                                                                         | N/A | N/A |
| 10521824 | Sod3                                                                        | N/A | N/A |
| 10521830 | Slc35a4                                                                     | N/A | N/A |
| 10521832 | Pi4k2b                                                                      | N/A | N/A |
| 10521863 | Anapc4                                                                      | N/A | N/A |
| 10521907 | 1810013D10Rik                                                               | N/A | N/A |
| 10521913 | Rbpj                                                                        | N/A | N/A |
| 10521927 | Tbc1d19                                                                     | N/A | N/A |
| 10521964 | Gm10440                                                                     | N/A | N/A |
| 10521966 | Papd4                                                                       | N/A | N/A |
| 10521969 | Immp1l                                                                      | N/A | N/A |
| 10521972 | Pcdh7                                                                       | N/A | N/A |
| 10521979 | ---                                                                         | N/A | N/A |
| 10521982 | Cbfa2t2                                                                     | N/A | N/A |
| 10521984 | G6pd2                                                                       | N/A | N/A |
| 10521986 | Dthd1                                                                       | N/A | N/A |
| 10521995 | 3110047P20Rik                                                               | N/A | N/A |
| 10522004 | 0610040J01Rik                                                               | N/A | N/A |
| 10522009 | Pgm1                                                                        | N/A | N/A |
| 10522024 | Tbc1d1                                                                      | N/A | N/A |
| 10522051 | Klf3                                                                        | N/A | N/A |
| 10522060 | Fam114a1                                                                    | N/A | N/A |
| 10522075 | Klh5                                                                        | N/A | N/A |
| 10522127 | Klb                                                                         | N/A | N/A |
| 10522149 | Ube2k                                                                       | N/A | N/A |
| 10522160 | N4bp2                                                                       | N/A | N/A |
| 10522182 | Rhoh                                                                        | N/A | N/A |
| 10522208 | Uchl1                                                                       | N/A | N/A |
| 10522217 | Limch1                                                                      | N/A | N/A |
| 10522248 | ---                                                                         | N/A | N/A |
| 10522250 | Tmem33                                                                      | N/A | N/A |
| 10522265 | Slc30a9                                                                     | N/A | N/A |
| 10522285 | C330024D21Rik                                                               | N/A | N/A |
| 10522301 | Cmpk1                                                                       | N/A | N/A |
| 10522303 | Guf1                                                                        | N/A | N/A |
| 10522324 | Gabrb1                                                                      | N/A | N/A |
| 10522366 | ---                                                                         | N/A | N/A |
| 10522378 | Slain2                                                                      | N/A | N/A |
| 10522388 | Slc10a4                                                                     | N/A | N/A |
| 10522396 | Ociad1                                                                      | N/A | N/A |
| 10522409 | ---                                                                         | N/A | N/A |
| 10522430 | Dcun1d4                                                                     | N/A | N/A |
| 10522445 | Spata18                                                                     | N/A | N/A |
| 10522462 | Usp46                                                                       | N/A | N/A |
| 10522465 | Snora26 /// 2700023E23Rik                                                   | N/A | N/A |
| 10522467 | Rasl11b                                                                     | N/A | N/A |
| 10522500 | Gsx2                                                                        | N/A | N/A |
| 10522503 | Pdgfra                                                                      | N/A | N/A |
| 10522530 | Kit                                                                         | N/A | N/A |
| 10522554 | Gm16367 /// D5Erttd577e /// E330014E10Rik /// Gm16427 /// Gm7792 /// Gm3106 | N/A | N/A |
| 10522558 | LOC624931 /// EG665031 /// LOC625240 /// Gm7682                             | N/A | N/A |
| 10522569 | Gm16367 /// D5Erttd577e /// E330014E10Rik /// Gm16427 /// Gm7792 /// Gm3106 | N/A | N/A |
| 10522573 | Gm16367 /// D5Erttd577e /// E330014E10Rik /// Gm16427 /// Gm7792 /// Gm3106 | N/A | N/A |
| 10522577 | D5Erttd577e /// E330014E10Rik /// Gm3286                                    | N/A | N/A |
| 10522581 | D5Erttd577e /// Gm16367 /// E330014E10Rik /// Gm16427 /// Gm7792 /// Gm3106 | N/A | N/A |
| 10522585 | LOC624931 /// EG665031 /// LOC625240 /// Gm7682                             | N/A | N/A |
| 10522589 | Srd5a3                                                                      | N/A | N/A |
| 10522596 | Tmem165                                                                     | N/A | N/A |
| 10522604 | Gm7467                                                                      | N/A | N/A |
| 10522606 | Exoc1                                                                       | N/A | N/A |
| 10522653 | Gm10430                                                                     | N/A | N/A |
| 10522655 | ---                                                                         | N/A | N/A |
| 10522658 | C530008M17Rik                                                               | N/A | N/A |
| 10522661 | C530008M17Rik                                                               | N/A | N/A |
| 10522666 | ---                                                                         | N/A | N/A |
| 10522668 | Paics                                                                       | N/A | N/A |
| 10522676 | Srp72                                                                       | N/A | N/A |
| 10522712 | Rest                                                                        | N/A | N/A |
| 10522742 | LOC280487                                                                   | N/A | N/A |
| 10522744 | Mthfr                                                                       | N/A | N/A |
| 10522749 | Lphn3                                                                       | N/A | N/A |
| 10522782 | Rpl7 /// Gm5045                                                             | N/A | N/A |
| 10522784 | Hmgn2                                                                       | N/A | N/A |
| 10522786 | ---                                                                         | N/A | N/A |
| 10522800 | ---                                                                         | N/A | N/A |
| 10522802 | Ythdc1                                                                      | N/A | N/A |
| 10522819 | Ugt2b35                                                                     | N/A | N/A |
| 10522873 | Gm7337                                                                      | N/A | N/A |
| 10522902 | BC051076                                                                    | N/A | N/A |
| 10522944 | ---                                                                         | N/A | N/A |
| 10522973 | Utp3                                                                        | N/A | N/A |

|          |                                                                             |     |     |
|----------|-----------------------------------------------------------------------------|-----|-----|
| 10522976 | Rufy3                                                                       | N/A | N/A |
| 10523021 | Slc4a4                                                                      | N/A | N/A |
| 10523056 | ---                                                                         | N/A | N/A |
| 10523058 | Eif5a                                                                       | N/A | N/A |
| 10523060 | Gm9958                                                                      | N/A | N/A |
| 10523062 | Alb                                                                         | N/A | N/A |
| 10523095 | Afm                                                                         | N/A | N/A |
| 10523111 | 5830473C10Rik                                                               | N/A | N/A |
| 10523151 | Cxcl1                                                                       | N/A | N/A |
| 10523161 | Mthfd2l                                                                     | N/A | N/A |
| 10523190 | Parm1                                                                       | N/A | N/A |
| 10523195 | Thap6                                                                       | N/A | N/A |
| 10523204 | Cdkl2 /// Gm9793                                                            | N/A | N/A |
| 10523206 | Uso1                                                                        | N/A | N/A |
| 10523245 | Fam47e                                                                      | N/A | N/A |
| 10523255 | Sbtd1                                                                       | N/A | N/A |
| 10523260 | Shroom3                                                                     | N/A | N/A |
| 10523275 | ---                                                                         | N/A | N/A |
| 10523277 | Ankrd56                                                                     | N/A | N/A |
| 10523279 | ---                                                                         | N/A | N/A |
| 10523281 | Sep 11                                                                      | N/A | N/A |
| 10523312 | Gm16367 /// D5Erttd577e /// E330014E10Rik /// Gm16427 /// Gm7792 /// Gm3106 | N/A | N/A |
| 10523337 | LOC624931 /// EG665031 /// LOC625240 /// Gm7682                             | N/A | N/A |
| 10523350 | D5Erttd577e /// E330014E10Rik /// Gm3286                                    | N/A | N/A |
| 10523354 | Gapdh /// Gm2606 /// Gm10293                                                | N/A | N/A |
| 10523357 | ---                                                                         | N/A | N/A |
| 10523359 | Cxcl13                                                                      | N/A | N/A |
| 10523365 | Mrpl1                                                                       | N/A | N/A |
| 10523468 | Bmp2k                                                                       | N/A | N/A |
| 10523479 | Slc25a5                                                                     | N/A | N/A |
| 10523481 | ---                                                                         | N/A | N/A |
| 10523483 | Prdm8                                                                       | N/A | N/A |
| 10523511 | Prkg2                                                                       | N/A | N/A |
| 10523518 | Enoph1                                                                      | N/A | N/A |
| 10523529 | Cops4                                                                       | N/A | N/A |
| 10523541 | Mrps18c                                                                     | N/A | N/A |
| 10523577 | ---                                                                         | N/A | N/A |
| 10523647 | Aff1                                                                        | N/A | N/A |
| 10523670 | Aff1                                                                        | N/A | N/A |
| 10523672 | ---                                                                         | N/A | N/A |
| 10523674 | Nudt9                                                                       | N/A | N/A |
| 10523717 | Spp1                                                                        | N/A | N/A |
| 10523727 | Pkd2                                                                        | N/A | N/A |
| 10523750 | D930016D06Rik                                                               | N/A | N/A |
| 10523752 | Txlng                                                                       | N/A | N/A |
| 10523754 | ---                                                                         | N/A | N/A |
| 10523756 | ---                                                                         | N/A | N/A |
| 10523758 | Lrrc8b                                                                      | N/A | N/A |
| 10523766 | Lrrc8c                                                                      | N/A | N/A |
| 10523785 | Zfp326                                                                      | N/A | N/A |
| 10523800 | ---                                                                         | N/A | N/A |
| 10523843 | ---                                                                         | N/A | N/A |
| 10523853 | Lpcat2b                                                                     | N/A | N/A |
| 10523856 | ---                                                                         | N/A | N/A |
| 10523865 | 1700028K03Rik /// A830010M20Rik                                             | N/A | N/A |
| 10523880 | Rpap2                                                                       | N/A | N/A |
| 10523891 | 1700013N18Rik                                                               | N/A | N/A |
| 10523901 | ---                                                                         | N/A | N/A |
| 10523903 | ---                                                                         | N/A | N/A |
| 10523905 | Mtf2                                                                        | N/A | N/A |
| 10523955 | Dr1                                                                         | N/A | N/A |
| 10523960 | Pigg                                                                        | N/A | N/A |
| 10523974 | Gm10419                                                                     | N/A | N/A |
| 10523977 | Gm10419                                                                     | N/A | N/A |
| 10524004 | Pcgf3                                                                       | N/A | N/A |
| 10524018 | Rpl34 /// Gm6404 /// Gm10154                                                | N/A | N/A |
| 10524020 | Tmem175                                                                     | N/A | N/A |
| 10524034 | Idua                                                                        | N/A | N/A |
| 10524077 | ---                                                                         | N/A | N/A |
| 10524079 | 2310001H12Rik                                                               | N/A | N/A |
| 10524082 | 2310001H12Rik /// LOC100044193                                              | N/A | N/A |
| 10524105 | Chfr                                                                        | N/A | N/A |
| 10524124 | Golga3                                                                      | N/A | N/A |
| 10524150 | Ankle2                                                                      | N/A | N/A |
| 10524227 | Fbrsl1                                                                      | N/A | N/A |
| 10524234 | Galnt9                                                                      | N/A | N/A |
| 10524264 | ---                                                                         | N/A | N/A |
| 10524284 | Ttc28                                                                       | N/A | N/A |
| 10524308 | Mir701                                                                      | N/A | N/A |
| 10524310 | Ttc28                                                                       | N/A | N/A |
| 10524312 | Ttc28                                                                       | N/A | N/A |
| 10524325 | Gm10405                                                                     | N/A | N/A |
| 10524327 | Mn1                                                                         | N/A | N/A |
| 10524331 | C130026L21Rik                                                               | N/A | N/A |

|          |                            |     |     |
|----------|----------------------------|-----|-----|
| 10524338 | Crybb1                     | N/A | N/A |
| 10524369 | Hps4                       | N/A | N/A |
| 10524384 | Gm6588                     | N/A | N/A |
| 10524394 | Mir469                     | N/A | N/A |
| 10524396 | Aym1                       | N/A | N/A |
| 10524398 | Wscd2                      | N/A | N/A |
| 10524411 | Ficd                       | N/A | N/A |
| 10524436 | Usp30                      | N/A | N/A |
| 10524460 | Acacb                      | N/A | N/A |
| 10524525 | Ube3b                      | N/A | N/A |
| 10524555 | Mvk                        | N/A | N/A |
| 10524568 | BC057022                   | N/A | N/A |
| 10524588 | Ankrd13a /// 4930515G01Rik | N/A | N/A |
| 10524621 | Oasl2                      | N/A | N/A |
| 10524631 | Oasl1                      | N/A | N/A |
| 10524640 | 2210016L21Rik /// Hnf1a    | N/A | N/A |
| 10524647 | Sppl3                      | N/A | N/A |
| 10524668 | Coq5                       | N/A | N/A |
| 10524676 | Srsf9                      | N/A | N/A |
| 10524681 | Triap1                     | N/A | N/A |
| 10524684 | Msi1                       | N/A | N/A |
| 10524698 | Pla2g1b                    | N/A | N/A |
| 10524703 | Pxn                        | N/A | N/A |
| 10524718 | Rplp0                      | N/A | N/A |
| 10524723 | Gcn1l1                     | N/A | N/A |
| 10524781 | Rab35                      | N/A | N/A |
| 10524842 | 4930569F06Rik              | N/A | N/A |
| 10524844 | Taok3                      | N/A | N/A |
| 10524874 | Vsig10                     | N/A | N/A |
| 10524876 | Vsig10                     | N/A | N/A |
| 10524878 | Vsig10                     | N/A | N/A |
| 10524889 | Ksr2                       | N/A | N/A |
| 10524909 | Nos1                       | N/A | N/A |
| 10524941 | Fbxo21                     | N/A | N/A |
| 10524965 | Fbxw8 /// Gm9754           | N/A | N/A |
| 10524969 | Hrk                        | N/A | N/A |
| 10524973 | 2410131K14Rik              | N/A | N/A |
| 10524983 | Med13l                     | N/A | N/A |
| 10525014 | ---                        | N/A | N/A |
| 10525016 | Tbx3                       | N/A | N/A |
| 10525041 | ---                        | N/A | N/A |
| 10525076 | Sds /// Plbd2              | N/A | N/A |
| 10525086 | Slc24a6                    | N/A | N/A |
| 10525111 | Ddx54                      | N/A | N/A |
| 10525187 | Rpl6 /// Gm6807            | N/A | N/A |
| 10525195 | Gm15800                    | N/A | N/A |
| 10525210 | Gm15800                    | N/A | N/A |
| 10525236 | Gm15800                    | N/A | N/A |
| 10525271 | Naa25                      | N/A | N/A |
| 10525296 | Brap                       | N/A | N/A |
| 10525313 | Atxn2                      | N/A | N/A |
| 10525336 | Fam109a                    | N/A | N/A |
| 10525352 | Ppp1cc                     | N/A | N/A |
| 10525374 | Pptc7                      | N/A | N/A |
| 10525381 | Vps29                      | N/A | N/A |
| 10525387 | Gpn3                       | N/A | N/A |
| 10525397 | Arpc3                      | N/A | N/A |
| 10525406 | Anapc7                     | N/A | N/A |
| 10525439 | P2rx4                      | N/A | N/A |
| 10525452 | Rnf34                      | N/A | N/A |
| 10525460 | A930024E05Rik              | N/A | N/A |
| 10525487 | 4932422M17Rik              | N/A | N/A |
| 10525489 | Setd1b                     | N/A | N/A |
| 10525495 | Setd1b                     | N/A | N/A |
| 10525506 | Psmc9                      | N/A | N/A |
| 10525542 | Bcl7a                      | N/A | N/A |
| 10525553 | ---                        | N/A | N/A |
| 10525657 | Denr                       | N/A | N/A |
| 10525711 | Ogfod2                     | N/A | N/A |
| 10525726 | 2810006K23Rik              | N/A | N/A |
| 10525731 | ---                        | N/A | N/A |
| 10525741 | Snrnp35                    | N/A | N/A |
| 10525744 | Tmed2                      | N/A | N/A |
| 10525766 | Gtf2h3                     | N/A | N/A |
| 10525780 | Tctn2                      | N/A | N/A |
| 10525804 | Atp6v0a2                   | N/A | N/A |
| 10525829 | ---                        | N/A | N/A |
| 10525831 | ---                        | N/A | N/A |
| 10525833 | Atp6v0a2                   | N/A | N/A |
| 10525835 | Dnahc10                    | N/A | N/A |
| 10525837 | Dnahc10                    | N/A | N/A |
| 10525854 | Dnahc10                    | N/A | N/A |
| 10525872 | Zfp664                     | N/A | N/A |
| 10525877 | Zfp664                     | N/A | N/A |

|          |                                 |     |     |
|----------|---------------------------------|-----|-----|
| 10525880 | Fam101a                         | N/A | N/A |
| 10525885 | Ubc /// Gm10382                 | N/A | N/A |
| 10525887 | Bri3bp                          | N/A | N/A |
| 10525893 | Aacs                            | N/A | N/A |
| 10525916 | Tmem132b                        | N/A | N/A |
| 10525921 | Tmem132b                        | N/A | N/A |
| 10525923 | Tmem132b                        | N/A | N/A |
| 10525929 | ---                             | N/A | N/A |
| 10525932 | Tmem132c                        | N/A | N/A |
| 10525942 | Glt1d1                          | N/A | N/A |
| 10525983 | Ran                             | N/A | N/A |
| 10526014 | Sfswap                          | N/A | N/A |
| 10526038 | Mmp17                           | N/A | N/A |
| 10526049 | Mrps17                          | N/A | N/A |
| 10526055 | Gbas                            | N/A | N/A |
| 10526069 | Cct6a                           | N/A | N/A |
| 10526085 | ---                             | N/A | N/A |
| 10526087 | Sumf2 /// Phkg1                 | N/A | N/A |
| 10526098 | Scand3                          | N/A | N/A |
| 10526106 | Vkorc11                         | N/A | N/A |
| 10526120 | Tpst1                           | N/A | N/A |
| 10526133 | Rabgef1                         | N/A | N/A |
| 10526145 | 0610007L01Rik                   | N/A | N/A |
| 10526181 | Gatsl2                          | N/A | N/A |
| 10526191 | Gatsl2                          | N/A | N/A |
| 10526193 | Wbscr16                         | N/A | N/A |
| 10526211 | ---                             | N/A | N/A |
| 10526213 | ---                             | N/A | N/A |
| 10526229 | Gm10369                         | N/A | N/A |
| 10526232 | Wbscr27                         | N/A | N/A |
| 10526241 | Cldn3                           | N/A | N/A |
| 10526274 | Dnajc30 /// Wbscr22             | N/A | N/A |
| 10526277 | Mlxipl                          | N/A | N/A |
| 10526302 | Tbi2                            | N/A | N/A |
| 10526311 | Bcl7b                           | N/A | N/A |
| 10526319 | Baz1b                           | N/A | N/A |
| 10526345 | Nsun5                           | N/A | N/A |
| 10526356 | Rhbdd2                          | N/A | N/A |
| 10526381 | Mdh2                            | N/A | N/A |
| 10526391 | Srrm3                           | N/A | N/A |
| 10526410 | Hspb1 /// Gm9817                | N/A | N/A |
| 10526482 | Polr2j                          | N/A | N/A |
| 10526487 | Alkbh4                          | N/A | N/A |
| 10526502 | Rabl5                           | N/A | N/A |
| 10526508 | Fis1                            | N/A | N/A |
| 10526520 | Plod3                           | N/A | N/A |
| 10526553 | Vgf                             | N/A | N/A |
| 10526559 | Ache                            | N/A | N/A |
| 10526564 | Ufsp1                           | N/A | N/A |
| 10526566 | Ephb4                           | N/A | N/A |
| 10526587 | Gigyf1                          | N/A | N/A |
| 10526614 | Actl6b                          | N/A | N/A |
| 10526630 | Trfr2                           | N/A | N/A |
| 10526654 | ---                             | N/A | N/A |
| 10526656 | Lrch4 /// Lrch4-sap25 /// Sap25 | N/A | N/A |
| 10526687 | 2010007H12Rik                   | N/A | N/A |
| 10526712 | Azgp1                           | N/A | N/A |
| 10526718 | Smok3a /// Smok3b               | N/A | N/A |
| 10526720 | Smok3a /// Smok3b               | N/A | N/A |
| 10526735 | Zscan21                         | N/A | N/A |
| 10526743 | Cops6                           | N/A | N/A |
| 10526754 | Ap4m1 /// Mcm7                  | N/A | N/A |
| 10526772 | Cnpy4                           | N/A | N/A |
| 10526781 | Mblac1                          | N/A | N/A |
| 10526792 | 0910001L09Rik                   | N/A | N/A |
| 10526838 | Got2 /// Gm10874                | N/A | N/A |
| 10526842 | Zfp157                          | N/A | N/A |
| 10526848 | A430033K04Rik                   | N/A | N/A |
| 10526853 | Fam20c                          | N/A | N/A |
| 10526880 | Pdgfa /// 6330403L08Rik         | N/A | N/A |
| 10526882 | Heatr2                          | N/A | N/A |
| 10526897 | Sun1                            | N/A | N/A |
| 10526923 | Get4                            | N/A | N/A |
| 10526941 | D830046C22Rik                   | N/A | N/A |
| 10526952 | Gpr30                           | N/A | N/A |
| 10526966 | ---                             | N/A | N/A |
| 10526968 | Elfn1                           | N/A | N/A |
| 10526972 | Nudt1                           | N/A | N/A |
| 10526977 | Eif3b                           | N/A | N/A |
| 10527009 | Chst12                          | N/A | N/A |
| 10527024 | Gm10091                         | N/A | N/A |
| 10527026 | AA881470                        | N/A | N/A |
| 10527043 | Amz1                            | N/A | N/A |
| 10527099 | ---                             | N/A | N/A |

|          |                                                                                                                |     |     |
|----------|----------------------------------------------------------------------------------------------------------------|-----|-----|
| 10527101 | Foxk1                                                                                                          | N/A | N/A |
| 10527148 | Slc29a4                                                                                                        | N/A | N/A |
| 10527158 | Fscn1                                                                                                          | N/A | N/A |
| 10527172 | Zfp12                                                                                                          | N/A | N/A |
| 10527182 | E130309D02Rik                                                                                                  | N/A | N/A |
| 10527184 | O610040B10Rik                                                                                                  | N/A | N/A |
| 10527213 | Daglb                                                                                                          | N/A | N/A |
| 10527229 | 2810453I06Rik                                                                                                  | N/A | N/A |
| 10527252 | Eif2ak1                                                                                                        | N/A | N/A |
| 10527306 | Lmtk2                                                                                                          | N/A | N/A |
| 10527340 | Trrap                                                                                                          | N/A | N/A |
| 10527423 | Trrap                                                                                                          | N/A | N/A |
| 10527425 | LOC280487                                                                                                      | N/A | N/A |
| 10527430 | Arpc1a                                                                                                         | N/A | N/A |
| 10527441 | Arpc1b                                                                                                         | N/A | N/A |
| 10527455 | Cpsf4                                                                                                          | N/A | N/A |
| 10527465 | Zkscan5                                                                                                        | N/A | N/A |
| 10527475 | Zfp655                                                                                                         | N/A | N/A |
| 10527483 | Zfp498                                                                                                         | N/A | N/A |
| 10527494 | Cyp3a25 /// Cyp3a59 /// Cyp3a57                                                                                | N/A | N/A |
| 10527508 | Cdk8                                                                                                           | N/A | N/A |
| 10527516 | Wasf3                                                                                                          | N/A | N/A |
| 10527530 | Rpl21 /// Gm9104 /// Rpl21-ps7 /// Gm16415 /// Gm16416 /// Rpl21-ps12 /// Rpl21-ps14 /// Rpl21-ps10 /// Gm8054 | N/A | N/A |
| 10527547 | Gtf3a /// Mtif3                                                                                                | N/A | N/A |
| 10527559 | Polr1d                                                                                                         | N/A | N/A |
| 10527562 | Gsx1                                                                                                           | N/A | N/A |
| 10527571 | ---                                                                                                            | N/A | N/A |
| 10527573 | ---                                                                                                            | N/A | N/A |
| 10527575 | Pan3                                                                                                           | N/A | N/A |
| 10527598 | Pomp                                                                                                           | N/A | N/A |
| 10527605 | Mtus2                                                                                                          | N/A | N/A |
| 10527624 | Usp11                                                                                                          | N/A | N/A |
| 10527646 | ---                                                                                                            | N/A | N/A |
| 10527694 | B3galt1                                                                                                        | N/A | N/A |
| 10527732 | Fry                                                                                                            | N/A | N/A |
| 10527799 | Gm10850                                                                                                        | N/A | N/A |
| 10527832 | Pds5b                                                                                                          | N/A | N/A |
| 10527870 | Kl                                                                                                             | N/A | N/A |
| 10527878 | Gm4741 /// V1rg10 /// Vmn1r2 /// Vmn1r3 /// Vmn1r238                                                           | N/A | N/A |
| 10527880 | Pex1 /// C030048B08Rik                                                                                         | N/A | N/A |
| 10527886 | Pex1 /// Gatad1                                                                                                | N/A | N/A |
| 10527888 | Gatad1                                                                                                         | N/A | N/A |
| 10527896 | Ankib1                                                                                                         | N/A | N/A |
| 10527920 | Cyp51                                                                                                          | N/A | N/A |
| 10527934 | ---                                                                                                            | N/A | N/A |
| 10527936 | Fzd1                                                                                                           | N/A | N/A |
| 10527940 | Cdk14                                                                                                          | N/A | N/A |
| 10527959 | ---                                                                                                            | N/A | N/A |
| 10527961 | ---                                                                                                            | N/A | N/A |
| 10527963 | Gm10484                                                                                                        | N/A | N/A |
| 10527970 | Gtpbp10                                                                                                        | N/A | N/A |
| 10528008 | Steap2                                                                                                         | N/A | N/A |
| 10528021 | Hspa8 /// LOC624853                                                                                            | N/A | N/A |
| 10528027 | ---                                                                                                            | N/A | N/A |
| 10528029 | ---                                                                                                            | N/A | N/A |
| 10528031 | Zfp804b                                                                                                        | N/A | N/A |
| 10528036 | ---                                                                                                            | N/A | N/A |
| 10528038 | Adam22                                                                                                         | N/A | N/A |
| 10528090 | Rundc3b                                                                                                        | N/A | N/A |
| 10528102 | Crot                                                                                                           | N/A | N/A |
| 10528120 | Dmtf1                                                                                                          | N/A | N/A |
| 10528143 | Ppp1r14b                                                                                                       | N/A | N/A |
| 10528145 | Grm3                                                                                                           | N/A | N/A |
| 10528161 | Gm10482                                                                                                        | N/A | N/A |
| 10528163 | ---                                                                                                            | N/A | N/A |
| 10528165 | LOC280487                                                                                                      | N/A | N/A |
| 10528167 | Gapdh /// Gm16374 /// Gm4609 /// Gm3200 /// Gm2451 /// Gm10293                                                 | N/A | N/A |
| 10528170 | Cyca                                                                                                           | N/A | N/A |
| 10528172 | ---                                                                                                            | N/A | N/A |
| 10528177 | Gm9758 /// Speer4e /// Speer4d /// Speer4c /// Gm7361                                                          | N/A | N/A |
| 10528183 | Gm9758 /// Speer4e /// Speer4d /// Speer4c                                                                     | N/A | N/A |
| 10528198 | ---                                                                                                            | N/A | N/A |
| 10528200 | Hnrnpa3                                                                                                        | N/A | N/A |
| 10528205 | LOC280487                                                                                                      | N/A | N/A |
| 10528207 | Cd36                                                                                                           | N/A | N/A |
| 10528227 | Gnai1                                                                                                          | N/A | N/A |
| 10528238 | Phtf2                                                                                                          | N/A | N/A |
| 10528257 | Rsbp1                                                                                                          | N/A | N/A |
| 10528268 | Ptpn12                                                                                                         | N/A | N/A |
| 10528287 | Gm6718                                                                                                         | N/A | N/A |
| 10528474 | Rpl221 /// LOC100042049                                                                                        | N/A | N/A |
| 10528476 | ---                                                                                                            | N/A | N/A |
| 10528478 | Rpl17 /// Gm10268 /// Rpl17-ps3                                                                                | N/A | N/A |
| 10528480 | ---                                                                                                            | N/A | N/A |

|          |                                                                                                |     |     |
|----------|------------------------------------------------------------------------------------------------|-----|-----|
| 10528482 | 5031425E22Rik                                                                                  | N/A | N/A |
| 10528484 | Srp2k /// MII5                                                                                 | N/A | N/A |
| 10528519 | ---                                                                                            | N/A | N/A |
| 10528521 | ---                                                                                            | N/A | N/A |
| 10528527 | Fam126a                                                                                        | N/A | N/A |
| 10528546 | Gabarapl2                                                                                      | N/A | N/A |
| 10528548 | Kcnh2                                                                                          | N/A | N/A |
| 10528583 | Cdk5                                                                                           | N/A | N/A |
| 10528598 | Fastk                                                                                          | N/A | N/A |
| 10528615 | Gm10472                                                                                        | N/A | N/A |
| 10528648 | Abcf2                                                                                          | N/A | N/A |
| 10528662 | Atp5l                                                                                          | N/A | N/A |
| 10528691 | Rheb                                                                                           | N/A | N/A |
| 10528702 | Prkag2                                                                                         | N/A | N/A |
| 10528721 | Galnt11 /// E130116L18Rik                                                                      | N/A | N/A |
| 10528723 | MI3                                                                                            | N/A | N/A |
| 10528788 | Gm10062                                                                                        | N/A | N/A |
| 10528794 | Gm10471                                                                                        | N/A | N/A |
| 10528804 | Gm10471                                                                                        | N/A | N/A |
| 10528810 | Speer4b /// Gm10471 /// Gm10220 /// Speer4a /// 5031410I06Rik /// Gm5862 /// Gm7347 /// Gm7361 | N/A | N/A |
| 10528815 | Speer4b                                                                                        | N/A | N/A |
| 10528821 | Speer4b //                                                                                     | N/A | N/A |
| 10528832 | ---                                                                                            | N/A | N/A |
| 10528840 | Paxip1                                                                                         | N/A | N/A |
| 10528880 | Lmbr1                                                                                          | N/A | N/A |
| 10528901 | C79130                                                                                         | N/A | N/A |
| 10528909 | ---                                                                                            | N/A | N/A |
| 10528911 | ---                                                                                            | N/A | N/A |
| 10528913 | Dnajb6 /// Gm5129                                                                              | N/A | N/A |
| 10528925 | 3110082J24Rik                                                                                  | N/A | N/A |
| 10528929 | Hadha                                                                                          | N/A | N/A |
| 10528970 | ---                                                                                            | N/A | N/A |
| 10529026 | LOC100502829                                                                                   | N/A | N/A |
| 10529028 | Ost4 /// Agbl5                                                                                 | N/A | N/A |
| 10529034 | Cgref1                                                                                         | N/A | N/A |
| 10529041 | Preb                                                                                           | N/A | N/A |
| 10529082 | Mpv17                                                                                          | N/A | N/A |
| 10529091 | Gtf3c2                                                                                         | N/A | N/A |
| 10529093 | Gtf3c2                                                                                         | N/A | N/A |
| 10529133 | Zfp513                                                                                         | N/A | N/A |
| 10529142 | Ppm1g                                                                                          | N/A | N/A |
| 10529154 | Nrbp1 /// Gm9970                                                                               | N/A | N/A |
| 10529156 | lft172                                                                                         | N/A | N/A |
| 10529206 | Fndc4                                                                                          | N/A | N/A |
| 10529215 | ---                                                                                            | N/A | N/A |
| 10529226 | Rbks                                                                                           | N/A | N/A |
| 10529235 | Gm10463                                                                                        | N/A | N/A |
| 10529237 | Yes1 /// Gm10461                                                                               | N/A | N/A |
| 10529252 | C330019G07Rik                                                                                  | N/A | N/A |
| 10529260 | C330019G07Rik                                                                                  | N/A | N/A |
| 10529273 | Ctbp1                                                                                          | N/A | N/A |
| 10529285 | Nkx1-1                                                                                         | N/A | N/A |
| 10529287 | Fam53a                                                                                         | N/A | N/A |
| 10529299 | Slbp                                                                                           | N/A | N/A |
| 10529305 | Tmem129                                                                                        | N/A | N/A |
| 10529311 | G630022F23Rik                                                                                  | N/A | N/A |
| 10529313 | Letm1                                                                                          | N/A | N/A |
| 10529375 | Mxd4                                                                                           | N/A | N/A |
| 10529402 | Tnip2                                                                                          | N/A | N/A |
| 10529410 | Mfsd10                                                                                         | N/A | N/A |
| 10529425 | Nop14                                                                                          | N/A | N/A |
| 10529445 | Lrpap1                                                                                         | N/A | N/A |
| 10529454 | E130018O15Rik                                                                                  | N/A | N/A |
| 10529468 | 2310079F23Rik                                                                                  | N/A | N/A |
| 10529480 | Acox3                                                                                          | N/A | N/A |
| 10529544 | ---                                                                                            | N/A | N/A |
| 10529547 | Tada2b                                                                                         | N/A | N/A |
| 10529567 | D5Ert579e                                                                                      | N/A | N/A |
| 10529577 | Cno                                                                                            | N/A | N/A |
| 10529581 | Mrfap1                                                                                         | N/A | N/A |
| 10529584 | Man2b2                                                                                         | N/A | N/A |
| 10529605 | Wfs1                                                                                           | N/A | N/A |
| 10529636 | Stk32b                                                                                         | N/A | N/A |
| 10529656 | Nsg1                                                                                           | N/A | N/A |
| 10529689 | Wdr1                                                                                           | N/A | N/A |
| 10529706 | 4930421P07Rik                                                                                  | N/A | N/A |
| 10529708 | Zfp518b                                                                                        | N/A | N/A |
| 10529730 | ---                                                                                            | N/A | N/A |
| 10529739 | ---                                                                                            | N/A | N/A |
| 10529741 | Rab28                                                                                          | N/A | N/A |
| 10529758 | Bod1l                                                                                          | N/A | N/A |
| 10529792 | ---                                                                                            | N/A | N/A |
| 10529797 | ---                                                                                            | N/A | N/A |
| 10529799 | Cpeb2 /// Gm7854                                                                               | N/A | N/A |

|          |                                                                                                              |     |     |
|----------|--------------------------------------------------------------------------------------------------------------|-----|-----|
| 10529801 | Fbxl5                                                                                                        | N/A | N/A |
| 10529815 | LOC100505155                                                                                                 | N/A | N/A |
| 10529817 | Rpl15 /// Gm5292 /// Gm4294                                                                                  | N/A | N/A |
| 10529858 | Tapt1                                                                                                        | N/A | N/A |
| 10529873 | Rab2a                                                                                                        | N/A | N/A |
| 10529875 | Ldb2                                                                                                         | N/A | N/A |
| 10529887 | ---                                                                                                          | N/A | N/A |
| 10529895 | Qdpr                                                                                                         | N/A | N/A |
| 10529921 | ---                                                                                                          | N/A | N/A |
| 10529923 | Lcorl                                                                                                        | N/A | N/A |
| 10529937 | Kcnp4                                                                                                        | N/A | N/A |
| 10529953 | Gm10048                                                                                                      | N/A | N/A |
| 10529957 | Gpr125                                                                                                       | N/A | N/A |
| 10529977 | Ppargc1a                                                                                                     | N/A | N/A |
| 10529979 | Ppargc1a                                                                                                     | N/A | N/A |
| 10529995 | Dhx15                                                                                                        | N/A | N/A |
| 10530013 | Gm447                                                                                                        | N/A | N/A |
| 10530017 | ---                                                                                                          | N/A | N/A |
| 10530029 | Lgi2                                                                                                         | N/A | N/A |
| 10530045 | Sepsecs                                                                                                      | N/A | N/A |
| 10530087 | Gm10441                                                                                                      | N/A | N/A |
| 10530096 | ---                                                                                                          | N/A | N/A |
| 10530098 | ---                                                                                                          | N/A | N/A |
| 10530100 | Arap2                                                                                                        | N/A | N/A |
| 10530128 | Gm9954 /// 3110047P20Rik                                                                                     | N/A | N/A |
| 10530140 | ---                                                                                                          | N/A | N/A |
| 10530194 | Rpl9 /// Gm5451                                                                                              | N/A | N/A |
| 10530201 | Ugdh                                                                                                         | N/A | N/A |
| 10530215 | 1110003E01Rik                                                                                                | N/A | N/A |
| 10530225 | Pds5a                                                                                                        | N/A | N/A |
| 10530257 | N4bp2                                                                                                        | N/A | N/A |
| 10530269 | Rbm47                                                                                                        | N/A | N/A |
| 10530278 | ---                                                                                                          | N/A | N/A |
| 10530283 | ---                                                                                                          | N/A | N/A |
| 10530287 | Apbb2                                                                                                        | N/A | N/A |
| 10530319 | Atp8a1                                                                                                       | N/A | N/A |
| 10530369 | ---                                                                                                          | N/A | N/A |
| 10530391 | ---                                                                                                          | N/A | N/A |
| 10530393 | Gabrg1                                                                                                       | N/A | N/A |
| 10530421 | Gabra4                                                                                                       | N/A | N/A |
| 10530467 | Nfxl1                                                                                                        | N/A | N/A |
| 10530477 | Nfxl1                                                                                                        | N/A | N/A |
| 10530492 | Nfxl1                                                                                                        | N/A | N/A |
| 10530496 | Zar1                                                                                                         | N/A | N/A |
| 10530499 | Slc10a4 /// Gm5868                                                                                           | N/A | N/A |
| 10530536 | Tec                                                                                                          | N/A | N/A |
| 10530558 | Slain2                                                                                                       | N/A | N/A |
| 10530560 | Slain2                                                                                                       | N/A | N/A |
| 10530563 | Fryl                                                                                                         | N/A | N/A |
| 10530592 | Fryl                                                                                                         | N/A | N/A |
| 10530612 | Fryl                                                                                                         | N/A | N/A |
| 10530615 | Ociad2                                                                                                       | N/A | N/A |
| 10530625 | ---                                                                                                          | N/A | N/A |
| 10530633 | Sgcb                                                                                                         | N/A | N/A |
| 10530641 | Usp46                                                                                                        | N/A | N/A |
| 10530652 | Scfd2                                                                                                        | N/A | N/A |
| 10530683 | Chic2                                                                                                        | N/A | N/A |
| 10530722 | A430089i19Rik /// BC061212 /// BC080696 /// LOC665755 /// Gm3147 /// Gm10424                                 | N/A | N/A |
| 10530726 | A430089i19Rik /// BC061212 /// BC080696 /// LOC665755 /// Gm3147 /// Gm10424                                 | N/A | N/A |
| 10530731 | Srd5a3                                                                                                       | N/A | N/A |
| 10530759 | Ube2n                                                                                                        | N/A | N/A |
| 10530783 | Gm10430                                                                                                      | N/A | N/A |
| 10530787 | Aasdh                                                                                                        | N/A | N/A |
| 10530806 | Ppat                                                                                                         | N/A | N/A |
| 10530841 | lgfbp7                                                                                                       | N/A | N/A |
| 10530847 | Pea15b                                                                                                       | N/A | N/A |
| 10530849 | ---                                                                                                          | N/A | N/A |
| 10530851 | Mtch2                                                                                                        | N/A | N/A |
| 10530868 | ---                                                                                                          | N/A | N/A |
| 10530870 | Epha5                                                                                                        | N/A | N/A |
| 10530910 | Uba6                                                                                                         | N/A | N/A |
| 10531034 | Ugt2b34                                                                                                      | N/A | N/A |
| 10531049 | ---                                                                                                          | N/A | N/A |
| 10531057 | Ugt2b5                                                                                                       | N/A | N/A |
| 10531061 | Ugt2b37                                                                                                      | N/A | N/A |
| 10531066 | Ugt2a3                                                                                                       | N/A | N/A |
| 10531073 | Ugt2b38                                                                                                      | N/A | N/A |
| 10531087 | Sult1b1                                                                                                      | N/A | N/A |
| 10531100 | Sult1d1                                                                                                      | N/A | N/A |
| 10531133 | Grsf1                                                                                                        | N/A | N/A |
| 10531144 | Rpl21 /// Gm6813 /// Gm9104 /// Rpl21-ps4 /// Rpl21-ps7 /// Gm16416 /// Rpl21-ps12 /// Rpl21-ps10 /// Gm8054 | N/A | N/A |
| 10531149 | Gc                                                                                                           | N/A | N/A |
| 10531166 | Adamts3                                                                                                      | N/A | N/A |
| 10531173 | Adamts3                                                                                                      | N/A | N/A |

|          |                                                                             |     |     |
|----------|-----------------------------------------------------------------------------|-----|-----|
| 10531175 | Adamts3                                                                     | N/A | N/A |
| 10531177 | Adamts3                                                                     | N/A | N/A |
| 10531179 | Adamts3                                                                     | N/A | N/A |
| 10531181 | Adamts3                                                                     | N/A | N/A |
| 10531183 | Adamts3                                                                     | N/A | N/A |
| 10531185 | Adamts3                                                                     | N/A | N/A |
| 10531187 | Adamts3                                                                     | N/A | N/A |
| 10531189 | Adamts3                                                                     | N/A | N/A |
| 10531191 | Adamts3                                                                     | N/A | N/A |
| 10531193 | Adamts3                                                                     | N/A | N/A |
| 10531195 | Adamts3                                                                     | N/A | N/A |
| 10531197 | Adamts3                                                                     | N/A | N/A |
| 10531199 | D130050E23Rik                                                               | N/A | N/A |
| 10531201 | Adamts3                                                                     | N/A | N/A |
| 10531203 | Adamts3                                                                     | N/A | N/A |
| 10531208 | Cox18                                                                       | N/A | N/A |
| 10531215 | Ankrd17                                                                     | N/A | N/A |
| 10531259 | Gm10426                                                                     | N/A | N/A |
| 10531261 | Rassf6                                                                      | N/A | N/A |
| 10531284 | Trmt112                                                                     | N/A | N/A |
| 10531286 | Vdac2                                                                       | N/A | N/A |
| 10531288 | ---                                                                         | N/A | N/A |
| 10531290 | Rchy1 /// Thap6                                                             | N/A | N/A |
| 10531323 | G3bp2                                                                       | N/A | N/A |
| 10531338 | ---                                                                         | N/A | N/A |
| 10531370 | Naaa                                                                        | N/A | N/A |
| 10531383 | Sdad1                                                                       | N/A | N/A |
| 10531407 | Cxcl9                                                                       | N/A | N/A |
| 10531415 | Cxcl10                                                                      | N/A | N/A |
| 10531437 | Scarb2                                                                      | N/A | N/A |
| 10531488 | Ccni                                                                        | N/A | N/A |
| 10531497 | Gm16367 /// D5Erttd577e /// E330014E10Rik /// Gm16427 /// Gm7792 /// Gm3106 | N/A | N/A |
| 10531507 | A43008919Rik /// BC061212 /// BC080696 /// LOC665755 /// Gm3147 /// Gm10424 | N/A | N/A |
| 10531512 | A43008919Rik /// BC061212 /// BC080696 /// LOC665755 /// Gm3147 /// Gm10424 | N/A | N/A |
| 10531518 | A43008919Rik /// BC061212 /// BC080696 /// LOC665755 /// Gm3147 /// Gm10424 | N/A | N/A |
| 10531523 | A43008919Rik /// BC061212 /// BC080696 /// LOC665755 /// Gm3147 /// Gm10424 | N/A | N/A |
| 10531529 | Cnot6l                                                                      | N/A | N/A |
| 10531544 | Paqr3                                                                       | N/A | N/A |
| 10531560 | Antxr2                                                                      | N/A | N/A |
| 10531579 | Hmgb1                                                                       | N/A | N/A |
| 10531610 | Rasgef1b                                                                    | N/A | N/A |
| 10531627 | A930011G23Rik                                                               | N/A | N/A |
| 10531633 | Hnrnpd                                                                      | N/A | N/A |
| 10531675 | Sec31a                                                                      | N/A | N/A |
| 10531707 | Lin54                                                                       | N/A | N/A |
| 10531722 | ---                                                                         | N/A | N/A |
| 10531724 | Plac8                                                                       | N/A | N/A |
| 10531752 | Helq                                                                        | N/A | N/A |
| 10531776 | Fam175a                                                                     | N/A | N/A |
| 10531794 | Wdfy3                                                                       | N/A | N/A |
| 10531796 | Wdfy3                                                                       | N/A | N/A |
| 10531866 | Mapk10                                                                      | N/A | N/A |
| 10531869 | Mapk10                                                                      | N/A | N/A |
| 10531899 | Klh8                                                                        | N/A | N/A |
| 10531910 | Hsd17b13                                                                    | N/A | N/A |
| 10531919 | Hsd17b11                                                                    | N/A | N/A |
| 10531928 | ---                                                                         | N/A | N/A |
| 10531931 | Sparcl1                                                                     | N/A | N/A |
| 10531944 | Gm10047                                                                     | N/A | N/A |
| 10531950 | ---                                                                         | N/A | N/A |
| 10531970 | ---                                                                         | N/A | N/A |
| 10531987 | Gbp4                                                                        | N/A | N/A |
| 10531994 | Gbp10 /// Mpa2l /// Gbp11 /// Gbp8                                          | N/A | N/A |
| 10532019 | Gbp11 /// Mpa2l                                                             | N/A | N/A |
| 10532025 | Rps15a                                                                      | N/A | N/A |
| 10532027 | Gapdh /// Gm16374 /// Gm2606 /// Gm4609 /// Gm3200 /// Gm2451 /// Gm10293   | N/A | N/A |
| 10532030 | ---                                                                         | N/A | N/A |
| 10532040 | Zfp644                                                                      | N/A | N/A |
| 10532085 | Tgfb3                                                                       | N/A | N/A |
| 10532133 | Evi5                                                                        | N/A | N/A |
| 10532150 | Fam69a                                                                      | N/A | N/A |
| 10532157 | Tmed5                                                                       | N/A | N/A |
| 10532164 | Atp5k                                                                       | N/A | N/A |
| 10532180 | Cplx1                                                                       | N/A | N/A |
| 10532187 | Gak                                                                         | N/A | N/A |
| 10532241 | Slc26a1 /// ldua                                                            | N/A | N/A |
| 10532301 | ---                                                                         | N/A | N/A |
| 10532305 | 2310001H12Rik /// 4930522L14Rik                                             | N/A | N/A |
| 10532308 | ---                                                                         | N/A | N/A |
| 10532310 | 2310001H12Rik /// 4930522L14Rik                                             | N/A | N/A |
| 10532313 | AB010352                                                                    | N/A | N/A |
| 10532315 | ---                                                                         | N/A | N/A |
| 10532317 | Gtpbp6                                                                      | N/A | N/A |
| 10532330 | Ankle2                                                                      | N/A | N/A |



|          |                                |     |     |
|----------|--------------------------------|-----|-----|
| 10532332 | Pgam5                          | N/A | N/A |
| 10532339 | Pxmp2                          | N/A | N/A |
| 10532368 | Fbrs1l                         | N/A | N/A |
| 10532390 | Noc4l                          | N/A | N/A |
| 10532407 | Ep400                          | N/A | N/A |
| 10532461 | ---                            | N/A | N/A |
| 10532534 | Gm6583                         | N/A | N/A |
| 10532538 | Asphd2                         | N/A | N/A |
| 10532542 | Sez6l                          | N/A | N/A |
| 10532574 | Myo18b                         | N/A | N/A |
| 10532576 | Myo18b                         | N/A | N/A |
| 10532578 | Myo18b                         | N/A | N/A |
| 10532580 | Myo18b                         | N/A | N/A |
| 10532582 | Myo18b                         | N/A | N/A |
| 10532584 | Myo18b                         | N/A | N/A |
| 10532586 | Myo18b                         | N/A | N/A |
| 10532588 | Myo18b                         | N/A | N/A |
| 10532592 | Myo18b                         | N/A | N/A |
| 10532594 | Myo18b                         | N/A | N/A |
| 10532596 | Myo18b                         | N/A | N/A |
| 10532616 | Myo18b                         | N/A | N/A |
| 10532618 | Myo18b                         | N/A | N/A |
| 10532620 | Myo18b                         | N/A | N/A |
| 10532624 | Myo18b                         | N/A | N/A |
| 10532626 | Myo18b                         | N/A | N/A |
| 10532630 | Adrbk2                         | N/A | N/A |
| 10532669 | 2900026A02Rik                  | N/A | N/A |
| 10532678 | F830115B05Rik                  | N/A | N/A |
| 10532680 | Sgsm1                          | N/A | N/A |
| 10532709 | ---                            | N/A | N/A |
| 10532744 | Selplg                         | N/A | N/A |
| 10532753 | Coro1c                         | N/A | N/A |
| 10532765 | ---                            | N/A | N/A |
| 10532767 | Ssh1                           | N/A | N/A |
| 10532784 | Svop                           | N/A | N/A |
| 10532802 | Alkbh2                         | N/A | N/A |
| 10532857 | Gltp                           | N/A | N/A |
| 10532865 | Git2                           | N/A | N/A |
| 10532892 | 1500011B03Rik                  | N/A | N/A |
| 10532896 | 2610524H06Rik                  | N/A | N/A |
| 10532901 | ---                            | N/A | N/A |
| 10532903 | Mir469                         | N/A | N/A |
| 10532907 | Hnf1a                          | N/A | N/A |
| 10532919 | Gm5148 /// Rps23               | N/A | N/A |
| 10532921 | Spp13 /// Gm10401              | N/A | N/A |
| 10532926 | Acads                          | N/A | N/A |
| 10532937 | Unc119b                        | N/A | N/A |
| 10532944 | Mlec                           | N/A | N/A |
| 10532954 | Mlec                           | N/A | N/A |
| 10532984 | Dynll1                         | N/A | N/A |
| 10532989 | Gatc                           | N/A | N/A |
| 10532993 | Cox6a1                         | N/A | N/A |
| 10532997 | 4930430022Rik                  | N/A | N/A |
| 10532999 | Sirt4                          | N/A | N/A |
| 10533003 | 1110006O24Rik                  | N/A | N/A |
| 10533007 | Ccdc64                         | N/A | N/A |
| 10533023 | Rpl29 /// Gm3550 /// Rpl29-ps2 | N/A | N/A |
| 10533026 | Prkab1                         | N/A | N/A |
| 10533050 | Hspb8                          | N/A | N/A |
| 10533055 | Srrm4                          | N/A | N/A |
| 10533071 | Suds3                          | N/A | N/A |
| 10533085 | Pebp1                          | N/A | N/A |
| 10533088 | Gm10399                        | N/A | N/A |
| 10533090 | Rfc5                           | N/A | N/A |
| 10533095 | Fbxw8 /// Gm9754               | N/A | N/A |
| 10533120 | Rbm19                          | N/A | N/A |
| 10533122 | Sdsl                           | N/A | N/A |
| 10533131 | Plbd2                          | N/A | N/A |
| 10533145 | Tpcn1                          | N/A | N/A |
| 10533176 | 1110008J03Rik                  | N/A | N/A |
| 10533180 | Ddx54                          | N/A | N/A |
| 10533182 | Dtx1                           | N/A | N/A |
| 10533261 | Rph3a                          | N/A | N/A |
| 10533285 | Ptprn11                        | N/A | N/A |
| 10533304 | Trafd1                         | N/A | N/A |
| 10533316 | Erp29                          | N/A | N/A |
| 10533320 | Adam1b                         | N/A | N/A |
| 10533323 | Adam1a                         | N/A | N/A |
| 10533345 | Aldh2                          | N/A | N/A |
| 10533386 | Sh2b3                          | N/A | N/A |
| 10533401 | Cux2                           | N/A | N/A |
| 10533403 | Cux2                           | N/A | N/A |
| 10533444 | 4930565B19Rik                  | N/A | N/A |
| 10533446 | Tctn1 /// Hvcn1                | N/A | N/A |

|          |                                         |     |     |
|----------|-----------------------------------------|-----|-----|
| 10533462 | Rad9b                                   | N/A | N/A |
| 10533474 | 1500011H22Rik                           | N/A | N/A |
| 10533483 | Atp2a2                                  | N/A | N/A |
| 10533504 | lft81                                   | N/A | N/A |
| 10533526 | ---                                     | N/A | N/A |
| 10533549 | Anapc5                                  | N/A | N/A |
| 10533569 | Kdm2b                                   | N/A | N/A |
| 10533603 | Rhof /// Tmem120b                       | N/A | N/A |
| 10533612 | Hpd                                     | N/A | N/A |
| 10533626 | Rpl35a /// Ino80 /// Gm10247            | N/A | N/A |
| 10533633 | Diablo /// B3gnt4                       | N/A | N/A |
| 10533644 | Vps33a                                  | N/A | N/A |
| 10533659 | Clip1                                   | N/A | N/A |
| 10533687 | Zcchc8                                  | N/A | N/A |
| 10533703 | Rsrc2                                   | N/A | N/A |
| 10533725 | Gpr81                                   | N/A | N/A |
| 10533729 | Vps37b                                  | N/A | N/A |
| 10533781 | Mphosph9                                | N/A | N/A |
| 10533807 | Cdk2ap1                                 | N/A | N/A |
| 10533812 | Sbno1                                   | N/A | N/A |
| 10533849 | Rilpl1                                  | N/A | N/A |
| 10533858 | Eif2b1                                  | N/A | N/A |
| 10533869 | Ccdc92                                  | N/A | N/A |
| 10533929 | Scarb1                                  | N/A | N/A |
| 10533945 | Ubc                                     | N/A | N/A |
| 10533961 | Dhx37                                   | N/A | N/A |
| 10533989 | Gm4868                                  | N/A | N/A |
| 10533991 | ---                                     | N/A | N/A |
| 10533993 | Slc15a4                                 | N/A | N/A |
| 10534002 | Tmem132d                                | N/A | N/A |
| 10534021 | Rimbp2                                  | N/A | N/A |
| 10534056 | Hpvc-ps                                 | N/A | N/A |
| 10534059 | Rps2 /// Rps2-ps6 /// Gm5921 /// Gm6139 | N/A | N/A |
| 10534075 | Psph                                    | N/A | N/A |
| 10534085 | Phkg1 /// Sumf2                         | N/A | N/A |
| 10534096 | Chchd2                                  | N/A | N/A |
| 10534120 | Asl                                     | N/A | N/A |
| 10534140 | 0610007L01Rik /// Gm6598                | N/A | N/A |
| 10534142 | Sbds                                    | N/A | N/A |
| 10534152 | Wbscr17                                 | N/A | N/A |
| 10534168 | Auts2                                   | N/A | N/A |
| 10534216 | Gtf2i                                   | N/A | N/A |
| 10534281 | Clip2                                   | N/A | N/A |
| 10534301 | Gm52                                    | N/A | N/A |
| 10534316 | Eif4h                                   | N/A | N/A |
| 10534324 | Limk1                                   | N/A | N/A |
| 10534384 | Wbscr28                                 | N/A | N/A |
| 10534395 | Cldn4                                   | N/A | N/A |
| 10534405 | Wbscr22 /// Dnajc30                     | N/A | N/A |
| 10534420 | Vps37d                                  | N/A | N/A |
| 10534426 | Fzd9                                    | N/A | N/A |
| 10534441 | Pom121 /// Nsun5                        | N/A | N/A |
| 10534501 | Rhbdd2                                  | N/A | N/A |
| 10534504 | Tmem120a                                | N/A | N/A |
| 10534531 | Ywhag                                   | N/A | N/A |
| 10534549 | ---                                     | N/A | N/A |
| 10534570 | Orai2                                   | N/A | N/A |
| 10534575 | Prkrip1                                 | N/A | N/A |
| 10534583 | ---                                     | N/A | N/A |
| 10534585 | Sh2b2                                   | N/A | N/A |
| 10534596 | Cux1                                    | N/A | N/A |
| 10534640 | Emid2                                   | N/A | N/A |
| 10534660 | Ap1s1                                   | N/A | N/A |
| 10534667 | Serpine1                                | N/A | N/A |
| 10534679 | Trim56                                  | N/A | N/A |
| 10534694 | Srrt                                    | N/A | N/A |
| 10534728 | Slc12a9                                 | N/A | N/A |
| 10534839 | Pop7                                    | N/A | N/A |
| 10534842 | Gnb2                                    | N/A | N/A |
| 10534854 | Mospd3                                  | N/A | N/A |
| 10534909 | Sp110 /// LOC100041885                  | N/A | N/A |
| 10534921 | Mepce                                   | N/A | N/A |
| 10534927 | Pilra                                   | N/A | N/A |
| 10534945 | Cyp3a13                                 | N/A | N/A |
| 10534960 | Gjc3                                    | N/A | N/A |
| 10534964 | Rps25 /// Gm4963                        | N/A | N/A |
| 10534966 | Zfp113                                  | N/A | N/A |
| 10534984 | Mir25                                   | N/A | N/A |
| 10534988 | Mir106b                                 | N/A | N/A |
| 10534990 | Taf6                                    | N/A | N/A |
| 10535006 | BC037034                                | N/A | N/A |
| 10535017 | Gal3st4 /// Gpc2                        | N/A | N/A |
| 10535025 | Got2 /// Gm10874                        | N/A | N/A |
| 10535034 | Zfp68                                   | N/A | N/A |

|          |                                                                              |     |     |
|----------|------------------------------------------------------------------------------|-----|-----|
| 10535043 | Pdffa                                                                        | N/A | N/A |
| 10535053 | Prkar1b                                                                      | N/A | N/A |
| 10535080 | Cox19                                                                        | N/A | N/A |
| 10535084 | 3110082117Rik                                                                | N/A | N/A |
| 10535091 | 4930432F04Rik /// Mir339                                                     | N/A | N/A |
| 10535095 | Zfand2a                                                                      | N/A | N/A |
| 10535174 | Tmem184a                                                                     | N/A | N/A |
| 10535208 | Ftsj2 /// Nudt1                                                              | N/A | N/A |
| 10535213 | Snx8                                                                         | N/A | N/A |
| 10535231 | Ttyh3                                                                        | N/A | N/A |
| 10535247 | Iqce                                                                         | N/A | N/A |
| 10535310 | Foxk1                                                                        | N/A | N/A |
| 10535329 | Papolb                                                                       | N/A | N/A |
| 10535331 | Mmd2                                                                         | N/A | N/A |
| 10535340 | Wipi2                                                                        | N/A | N/A |
| 10535369 | ---                                                                          | N/A | N/A |
| 10535372 | Fbxl18                                                                       | N/A | N/A |
| 10535378 | D430018E03Rik                                                                | N/A | N/A |
| 10535381 | Actb                                                                         | N/A | N/A |
| 10535389 | Rnf216                                                                       | N/A | N/A |
| 10535410 | ---                                                                          | N/A | N/A |
| 10535413 | ---                                                                          | N/A | N/A |
| 10535418 | Rbak                                                                         | N/A | N/A |
| 10535449 | E130309D02Rik                                                                | N/A | N/A |
| 10535458 | Zdhhc4                                                                       | N/A | N/A |
| 10535467 | 9530056K15Rik                                                                | N/A | N/A |
| 10535471 | Rac1 /// Daglb                                                               | N/A | N/A |
| 10535477 | Usp42                                                                        | N/A | N/A |
| 10535497 | Ankrd61                                                                      | N/A | N/A |
| 10535502 | Aimp2                                                                        | N/A | N/A |
| 10535508 | AU022870                                                                     | N/A | N/A |
| 10535532 | Tecpr1                                                                       | N/A | N/A |
| 10535559 | Baiap211                                                                     | N/A | N/A |
| 10535575 | Gm6272                                                                       | N/A | N/A |
| 10535577 | Tmem130                                                                      | N/A | N/A |
| 10535586 | Smurf1                                                                       | N/A | N/A |
| 10535626 | Rpl29                                                                        | N/A | N/A |
| 10535629 | Pdap1                                                                        | N/A | N/A |
| 10535637 | Ptcd1                                                                        | N/A | N/A |
| 10535647 | Atp5j2                                                                       | N/A | N/A |
| 10535653 | Zkscan14                                                                     | N/A | N/A |
| 10535704 | Cyp3a11                                                                      | N/A | N/A |
| 10535714 | Cyp3a25                                                                      | N/A | N/A |
| 10535725 | Rnf6                                                                         | N/A | N/A |
| 10535732 | Gpr12                                                                        | N/A | N/A |
| 10535739 | Usp12                                                                        | N/A | N/A |
| 10535747 | Gm10858                                                                      | N/A | N/A |
| 10535750 | Mtif3                                                                        | N/A | N/A |
| 10535776 | Prhoxnb                                                                      | N/A | N/A |
| 10535807 | Flt1                                                                         | N/A | N/A |
| 10535841 | Slc46a3                                                                      | N/A | N/A |
| 10535849 | ---                                                                          | N/A | N/A |
| 10535852 | Slc7a1                                                                       | N/A | N/A |
| 10535881 | ---                                                                          | N/A | N/A |
| 10535883 | Katnal1                                                                      | N/A | N/A |
| 10535894 | Hmgb1                                                                        | N/A | N/A |
| 10535900 | ---                                                                          | N/A | N/A |
| 10535904 | Hsph1                                                                        | N/A | N/A |
| 10535927 | Dscaml1 /// Nme2                                                             | N/A | N/A |
| 10535938 | N4bp211                                                                      | N/A | N/A |
| 10535946 | N4bp212                                                                      | N/A | N/A |
| 10535954 | Gm8675                                                                       | N/A | N/A |
| 10535956 | Stard13                                                                      | N/A | N/A |
| 10535972 | D730045B01Rik                                                                | N/A | N/A |
| 10535979 | Rfc3                                                                         | N/A | N/A |
| 10535989 | A430089119Rik /// BC061212 /// BC080696 /// LOC665755 /// Gm3147 /// Gm10424 | N/A | N/A |
| 10536002 | C87414 /// AA792892                                                          | N/A | N/A |
| 10536021 | Gm16367 /// D5Erttd577e /// E330014E10Rik /// Gm16427 /// Gm7792 /// Gm3106  | N/A | N/A |
| 10536025 | LOC624931 /// EG665031 /// LOC625240 /// Gm7682                              | N/A | N/A |
| 10536037 | Gm16367 /// D5Erttd577e /// E330014E10Rik /// Gm16427 /// Gm7792 /// Gm3106  | N/A | N/A |
| 10536041 | C87414 /// AA792892                                                          | N/A | N/A |
| 10536048 | Gm16367 /// D5Erttd577e /// E330014E10Rik /// Gm16427 /// Gm7792 /// Gm3106  | N/A | N/A |
| 10536052 | LOC624931 /// EG665031 /// Gm7682                                            | N/A | N/A |
| 10536061 | Zfp141                                                                       | N/A | N/A |
| 10536068 | Zfp788                                                                       | N/A | N/A |
| 10536079 | Gprc2a-rs5                                                                   | N/A | N/A |
| 10536083 | Gprc2a-rs5 /// Vmn2r58 /// Vmn2r60 /// Vmn2r61 /// Vmn2r-ps60                | N/A | N/A |
| 10536085 | A430089119Rik /// BC061212 /// BC080696 /// LOC665755 /// Gm3147 /// Gm10424 | N/A | N/A |
| 10536090 | ---                                                                          | N/A | N/A |
| 10536103 | LOC624931 /// EG665031 /// LOC625240 /// Gm7682                              | N/A | N/A |
| 10536122 | ---                                                                          | N/A | N/A |
| 10536136 | A430089119Rik /// BC061212 /// BC080696 /// LOC665755 /// Gm3147 /// Gm10424 | N/A | N/A |
| 10536141 | Dullard                                                                      | N/A | N/A |
| 10536143 | LOC624931 /// EG665031 /// LOC625240 /// Gm7682                              | N/A | N/A |

|          |                                                                             |     |     |
|----------|-----------------------------------------------------------------------------|-----|-----|
| 10536147 | Gm16367 /// D5Erttd577e /// E330014E10Rik /// Gm16427 /// Gm7792 /// Gm3106 | N/A | N/A |
| 10536151 | LOC624931 /// EG665031 /// LOC625240 /// Gm7682                             | N/A | N/A |
| 10536155 | D5Erttd577e /// Gm16367 /// E330014E10Rik /// Gm16427 /// Gm7792 /// Gm3106 | N/A | N/A |
| 10536159 | Gm16367 /// D5Erttd577e /// E330014E10Rik /// Gm16427 /// Gm7792 /// Gm3106 | N/A | N/A |
| 10536170 | Rn18s                                                                       | N/A | N/A |
| 10536176 | Ccdc132                                                                     | N/A | N/A |
| 10536216 | Gng11                                                                       | N/A | N/A |
| 10536273 | Casd1                                                                       | N/A | N/A |
| 10536294 | Peg10                                                                       | N/A | N/A |
| 10536297 | Ppp1r9a                                                                     | N/A | N/A |
| 10536334 | Dync1i1                                                                     | N/A | N/A |
| 10536353 | Dlx6                                                                        | N/A | N/A |
| 10536359 | Acn9                                                                        | N/A | N/A |
| 10536363 | Tac1                                                                        | N/A | N/A |
| 10536369 | C1gal1                                                                      | N/A | N/A |
| 10536376 | Mios                                                                        | N/A | N/A |
| 10536401 | Nxph1                                                                       | N/A | N/A |
| 10536405 | Nxph1                                                                       | N/A | N/A |
| 10536407 | Phf14                                                                       | N/A | N/A |
| 10536425 | ---                                                                         | N/A | N/A |
| 10536429 | Tmem106b                                                                    | N/A | N/A |
| 10536440 | Gm725                                                                       | N/A | N/A |
| 10536442 | ---                                                                         | N/A | N/A |
| 10536444 | Foxp2                                                                       | N/A | N/A |
| 10536481 | ---                                                                         | N/A | N/A |
| 10536483 | Tes                                                                         | N/A | N/A |
| 10536494 | Cav2                                                                        | N/A | N/A |
| 10536499 | Cav1                                                                        | N/A | N/A |
| 10536505 | Met                                                                         | N/A | N/A |
| 10536541 | St7                                                                         | N/A | N/A |
| 10536593 | Tsen15                                                                      | N/A | N/A |
| 10536595 | Naa38                                                                       | N/A | N/A |
| 10536609 | ---                                                                         | N/A | N/A |
| 10536611 | Kcnd2                                                                       | N/A | N/A |
| 10536620 | Ing3                                                                        | N/A | N/A |
| 10536635 | A430107O13Rik                                                               | N/A | N/A |
| 10536667 | Ptprz1                                                                      | N/A | N/A |
| 10536743 | ---                                                                         | N/A | N/A |
| 10536746 | Arf5                                                                        | N/A | N/A |
| 10536762 | Snd1                                                                        | N/A | N/A |
| 10536787 | Mir129-1                                                                    | N/A | N/A |
| 10536818 | Calu                                                                        | N/A | N/A |
| 10536827 | Ccdc136                                                                     | N/A | N/A |
| 10536895 | Atp6v1f                                                                     | N/A | N/A |
| 10536898 | Irf5                                                                        | N/A | N/A |
| 10536908 | Tspan33                                                                     | N/A | N/A |
| 10536917 | Smo                                                                         | N/A | N/A |
| 10536931 | Ahcyl2                                                                      | N/A | N/A |
| 10536949 | Fam40b                                                                      | N/A | N/A |
| 10536973 | ---                                                                         | N/A | N/A |
| 10536994 | ---                                                                         | N/A | N/A |
| 10536996 | Klhdc10                                                                     | N/A | N/A |
| 10537062 | Mest /// Copg2                                                              | N/A | N/A |
| 10537076 | Mir335                                                                      | N/A | N/A |
| 10537078 | Mkln1                                                                       | N/A | N/A |
| 10537098 | 1700012A03Rik                                                               | N/A | N/A |
| 10537102 | Exoc4                                                                       | N/A | N/A |
| 10537157 | Akr1b10                                                                     | N/A | N/A |
| 10537184 | Cald1                                                                       | N/A | N/A |
| 10537227 | Tmem140 /// 3110062M04Rik                                                   | N/A | N/A |
| 10537244 | Rpl17 /// Rpl17-ps3                                                         | N/A | N/A |
| 10537246 | Nup205                                                                      | N/A | N/A |
| 10537290 | ---                                                                         | N/A | N/A |
| 10537292 | 1810058I24Rik                                                               | N/A | N/A |
| 10537296 | Mir490                                                                      | N/A | N/A |
| 10537298 | Chrm2                                                                       | N/A | N/A |
| 10537306 | Akr1d1                                                                      | N/A | N/A |
| 10537316 | Atp6v0c /// Atp6v0c-ps2                                                     | N/A | N/A |
| 10537343 | Tmem213 /// Atp6v0a4                                                        | N/A | N/A |
| 10537347 | ---                                                                         | N/A | N/A |
| 10537349 | Rpl30 /// Gm12191 /// Gm6570 /// Gm6109                                     | N/A | N/A |
| 10537353 | Ttc26                                                                       | N/A | N/A |
| 10537375 | Ubn2                                                                        | N/A | N/A |
| 10537394 | 1110001J03Rik                                                               | N/A | N/A |
| 10537397 | Luc7l2                                                                      | N/A | N/A |
| 10537406 | Clec21                                                                      | N/A | N/A |
| 10537426 | ---                                                                         | N/A | N/A |
| 10537437 | Mkrn1                                                                       | N/A | N/A |
| 10537441 | Adck2                                                                       | N/A | N/A |
| 10537452 | Ndufb2                                                                      | N/A | N/A |
| 10537458 | Gm5567                                                                      | N/A | N/A |
| 10537463 | Agk                                                                         | N/A | N/A |
| 10537494 | Ssbp1                                                                       | N/A | N/A |
| 10537499 | Tas2r137                                                                    | N/A | N/A |

|          |                                     |     |     |
|----------|-------------------------------------|-----|-----|
| 10537501 | Tas2r108                            | N/A | N/A |
| 10537504 | ---                                 | N/A | N/A |
| 10537506 | Olfr460                             | N/A | N/A |
| 10537509 | Mgam                                | N/A | N/A |
| 10537558 | Gm6273                              | N/A | N/A |
| 10537657 | Ephb6                               | N/A | N/A |
| 10537710 | Tas2r144                            | N/A | N/A |
| 10537712 | Gstk1                               | N/A | N/A |
| 10537728 | Casp2                               | N/A | N/A |
| 10537770 | Zyx                                 | N/A | N/A |
| 10537785 | Tas2r143                            | N/A | N/A |
| 10537789 | Tas2r126                            | N/A | N/A |
| 10537791 | Olfr453                             | N/A | N/A |
| 10537797 | ---                                 | N/A | N/A |
| 10537799 | Olfr450                             | N/A | N/A |
| 10537801 | Olfr449                             | N/A | N/A |
| 10537803 | Olfr448                             | N/A | N/A |
| 10537805 | Olfr447                             | N/A | N/A |
| 10537807 | Olfr446                             | N/A | N/A |
| 10537817 | Olfr237-ps1 /// Olfr444 /// Olfr441 | N/A | N/A |
| 10537821 | Olfr437                             | N/A | N/A |
| 10537826 | Olfr435                             | N/A | N/A |
| 10537828 | Olfr434                             | N/A | N/A |
| 10537849 | Arhgef5                             | N/A | N/A |
| 10537851 | Cntnap2                             | N/A | N/A |
| 10537880 | ---                                 | N/A | N/A |
| 10537909 | Rny3                                | N/A | N/A |
| 10537911 | Zfp398                              | N/A | N/A |
| 10537934 | Zfp212                              | N/A | N/A |
| 10537938 | Al894139 /// Zfp783                 | N/A | N/A |
| 10537957 | Krba1                               | N/A | N/A |
| 10538080 | Rpl35a /// Ino80 /// Gm10247        | N/A | N/A |
| 10538082 | Atp6v0e2                            | N/A | N/A |
| 10538087 | Lrrc61                              | N/A | N/A |
| 10538106 | Zfp775                              | N/A | N/A |
| 10538109 | Al854703                            | N/A | N/A |
| 10538135 | Gimap7                              | N/A | N/A |
| 10538138 | Gimap1                              | N/A | N/A |
| 10538150 | Tmem176a                            | N/A | N/A |
| 10538159 | Gm7932                              | N/A | N/A |
| 10538201 | 2410003K15Rik                       | N/A | N/A |
| 10538247 | Npy                                 | N/A | N/A |
| 10538253 | Mpp6                                | N/A | N/A |
| 10538269 | Dfna5                               | N/A | N/A |
| 10538271 | ---                                 | N/A | N/A |
| 10538273 | BC022713                            | N/A | N/A |
| 10538275 | Nfe2l3                              | N/A | N/A |
| 10538282 | Cbx3 /// Gm6901                     | N/A | N/A |
| 10538305 | 5730596B20Rik                       | N/A | N/A |
| 10538318 | Tax1bp1                             | N/A | N/A |
| 10538352 | ---                                 | N/A | N/A |
| 10538354 | 1200009O22Rik                       | N/A | N/A |
| 10538394 | Plekha8                             | N/A | N/A |
| 10538408 | 2410066E13Rik                       | N/A | N/A |
| 10538413 | Znrf2                               | N/A | N/A |
| 10538420 | Gars                                | N/A | N/A |
| 10538459 | Aqp1                                | N/A | N/A |
| 10538482 | Adcyap1r1                           | N/A | N/A |
| 10538519 | Gsbs                                | N/A | N/A |
| 10538526 | Avl9                                | N/A | N/A |
| 10538545 | Gm10209                             | N/A | N/A |
| 10538547 | Fkbp9                               | N/A | N/A |
| 10538569 | Vmn1r9 /// Vmn1r10                  | N/A | N/A |
| 10538571 | Vmn1r9 /// Vmn1r10                  | N/A | N/A |
| 10538582 | Vmn1r15                             | N/A | N/A |
| 10538584 | ---                                 | N/A | N/A |
| 10538586 | Vmn1r19                             | N/A | N/A |
| 10538588 | Vmn1r20 /// Vmn1r27                 | N/A | N/A |
| 10538617 | Lanc12                              | N/A | N/A |
| 10538629 | Rps15                               | N/A | N/A |
| 10538636 | Vmn1r29                             | N/A | N/A |
| 10538638 | ---                                 | N/A | N/A |
| 10538640 | Abcg2                               | N/A | N/A |
| 10538658 | Herc3                               | N/A | N/A |
| 10538684 | Tigd2                               | N/A | N/A |
| 10538704 | ---                                 | N/A | N/A |
| 10538732 | Grid2                               | N/A | N/A |
| 10538749 | ---                                 | N/A | N/A |
| 10538751 | Atoh1                               | N/A | N/A |
| 10538753 | ---                                 | N/A | N/A |
| 10538781 | Gm8479                              | N/A | N/A |
| 10538783 | C130060K24Rik                       | N/A | N/A |
| 10538802 | A930038C07Rik                       | N/A | N/A |
| 10538811 | Prdm5                               | N/A | N/A |

|          |                                             |     |     |
|----------|---------------------------------------------|-----|-----|
| 10538832 | Mad2l1                                      | N/A | N/A |
| 10538840 | Vmn1r35 /// Vmn1r37 /// Vmn1r36 /// Vmn1r34 | N/A | N/A |
| 10538842 | Gng12                                       | N/A | N/A |
| 10538848 | ---                                         | N/A | N/A |
| 10538850 | ---                                         | N/A | N/A |
| 10538852 | A430010J10Rik                               | N/A | N/A |
| 10538855 | ---                                         | N/A | N/A |
| 10538857 | Serbp1                                      | N/A | N/A |
| 10538871 | Gm4964                                      | N/A | N/A |
| 10538878 | Gm10877                                     | N/A | N/A |
| 10538885 | ---                                         | N/A | N/A |
| 10538887 | Gm5153                                      | N/A | N/A |
| 10538890 | LOC641050                                   | N/A | N/A |
| 10538901 | BC005685                                    | N/A | N/A |
| 10538921 | ---                                         | N/A | N/A |
| 10538924 | LOC100046496                                | N/A | N/A |
| 10538929 | ---                                         | N/A | N/A |
| 10538934 | ---                                         | N/A | N/A |
| 10538939 | Eif2ak3                                     | N/A | N/A |
| 10538957 | ---                                         | N/A | N/A |
| 10538963 | Rpl34 /// Gm6404 /// Gm10154                | N/A | N/A |
| 10538965 | Fabp1                                       | N/A | N/A |
| 10538970 | Krcc1                                       | N/A | N/A |
| 10538975 | Gm1070                                      | N/A | N/A |
| 10539002 | Rnf103                                      | N/A | N/A |
| 10539015 | ---                                         | N/A | N/A |
| 10539017 | Reep1                                       | N/A | N/A |
| 10539026 | Immt                                        | N/A | N/A |
| 10539042 | Polr1a                                      | N/A | N/A |
| 10539104 | O610030E20Rik                               | N/A | N/A |
| 10539111 | Tmem150a                                    | N/A | N/A |
| 10539119 | Ggcx                                        | N/A | N/A |
| 10539143 | Retsat                                      | N/A | N/A |
| 10539156 | Gm15401                                     | N/A | N/A |
| 10539159 | Sudlg1                                      | N/A | N/A |
| 10539177 | Eif4a3 /// Gm8994                           | N/A | N/A |
| 10539209 | ---                                         | N/A | N/A |
| 10539211 | Lrrtm4                                      | N/A | N/A |
| 10539238 | Fam176a                                     | N/A | N/A |
| 10539242 | ---                                         | N/A | N/A |
| 10539244 | Tacr1                                       | N/A | N/A |
| 10539310 | Pcgf1                                       | N/A | N/A |
| 10539337 | Mogs                                        | N/A | N/A |
| 10539358 | 1700003E16Rik                               | N/A | N/A |
| 10539364 | Dctn1                                       | N/A | N/A |
| 10539421 | Mobkl1b                                     | N/A | N/A |
| 10539433 | Mobkl1b                                     | N/A | N/A |
| 10539435 | Bola3                                       | N/A | N/A |
| 10539441 | B230319C09Rik                               | N/A | N/A |
| 10539472 | Nagk                                        | N/A | N/A |
| 10539484 | Rpl18                                       | N/A | N/A |
| 10539486 | Zfml                                        | N/A | N/A |
| 10539574 | Npm3 /// Npm3-ps1                           | N/A | N/A |
| 10539577 | Spr                                         | N/A | N/A |
| 10539579 | Gm5878                                      | N/A | N/A |
| 10539581 | ---                                         | N/A | N/A |
| 10539584 | Emx1                                        | N/A | N/A |
| 10539592 | Smyd5                                       | N/A | N/A |
| 10539606 | Cct7                                        | N/A | N/A |
| 10539617 | Alms1                                       | N/A | N/A |
| 10539632 | Alms1                                       | N/A | N/A |
| 10539640 | Alms1                                       | N/A | N/A |
| 10539649 | Ptges3                                      | N/A | N/A |
| 10539653 | Tprkb                                       | N/A | N/A |
| 10539669 | Add2                                        | N/A | N/A |
| 10539700 | Rps28                                       | N/A | N/A |
| 10539702 | Fam136a                                     | N/A | N/A |
| 10539710 | Tia1                                        | N/A | N/A |
| 10539727 | C87436                                      | N/A | N/A |
| 10539739 | Asprv1                                      | N/A | N/A |
| 10539741 | Aak1                                        | N/A | N/A |
| 10539766 | Aak1                                        | N/A | N/A |
| 10539773 | Gfpt1                                       | N/A | N/A |
| 10539802 | Bmp10                                       | N/A | N/A |
| 10539810 | Ccdc48                                      | N/A | N/A |
| 10539813 | Ccdc48                                      | N/A | N/A |
| 10539822 | Copg                                        | N/A | N/A |
| 10539850 | 8430410A17Rik                               | N/A | N/A |
| 10539857 | Gm5577 /// Rab7                             | N/A | N/A |
| 10539861 | Rpn1                                        | N/A | N/A |
| 10539880 | Dnajb8 /// 1700031F10Rik                    | N/A | N/A |
| 10539882 | Ruvbl1                                      | N/A | N/A |
| 10539894 | Mgll                                        | N/A | N/A |
| 10539905 | Podxl2                                      | N/A | N/A |

|          |                          |     |     |
|----------|--------------------------|-----|-----|
| 10539907 | Tpra1                    | N/A | N/A |
| 10539927 | Gm1965                   | N/A | N/A |
| 10539931 | Gm1965                   | N/A | N/A |
| 10539952 | Vmn1r40                  | N/A | N/A |
| 10539957 | Vmn1r44                  | N/A | N/A |
| 10539963 | Vmn1r46                  | N/A | N/A |
| 10539965 | Vmn1r47                  | N/A | N/A |
| 10539967 | Vmn1r50                  | N/A | N/A |
| 10539973 | Vmn1r48 /// Vmn1r45      | N/A | N/A |
| 10539975 | Vmn1r52                  | N/A | N/A |
| 10539977 | V1ra8                    | N/A | N/A |
| 10539979 | ---                      | N/A | N/A |
| 10539981 | Vmn1r54                  | N/A | N/A |
| 10539990 | Uroc1                    | N/A | N/A |
| 10540012 | Zxdc                     | N/A | N/A |
| 10540034 | Aldh111                  | N/A | N/A |
| 10540059 | Slc41a3                  | N/A | N/A |
| 10540072 | Ppp1r2                   | N/A | N/A |
| 10540075 | Hdac11                   | N/A | N/A |
| 10540105 | Tmem43                   | N/A | N/A |
| 10540118 | Lsm3                     | N/A | N/A |
| 10540122 | Slc6a6                   | N/A | N/A |
| 10540141 | C130022K22Rik            | N/A | N/A |
| 10540191 | Nr2c2                    | N/A | N/A |
| 10540213 | ---                      | N/A | N/A |
| 10540215 | Slc25a26                 | N/A | N/A |
| 10540227 | Kbtbd8                   | N/A | N/A |
| 10540231 | ---                      | N/A | N/A |
| 10540241 | Arl6ip5                  | N/A | N/A |
| 10540265 | Mitf                     | N/A | N/A |
| 10540267 | ---                      | N/A | N/A |
| 10540269 | Gpr27                    | N/A | N/A |
| 10540271 | ---                      | N/A | N/A |
| 10540273 | Ube2v2                   | N/A | N/A |
| 10540283 | Ppp4r2                   | N/A | N/A |
| 10540287 | Gm10009                  | N/A | N/A |
| 10540298 | Ch1                      | N/A | N/A |
| 10540333 | Cntn6                    | N/A | N/A |
| 10540359 | Cntn4                    | N/A | N/A |
| 10540391 | Trnt1 /// Crbn           | N/A | N/A |
| 10540401 | Lrrn1                    | N/A | N/A |
| 10540405 | Setmar                   | N/A | N/A |
| 10540408 | Itpr1                    | N/A | N/A |
| 10540493 | Edem1                    | N/A | N/A |
| 10540507 | H3f3a                    | N/A | N/A |
| 10540531 | LOC280487                | N/A | N/A |
| 10540537 | ---                      | N/A | N/A |
| 10540540 | 0610010K06Rik            | N/A | N/A |
| 10540542 | LOC100503669             | N/A | N/A |
| 10540544 | Thumpd3                  | N/A | N/A |
| 10540554 | Setd5                    | N/A | N/A |
| 10540579 | Mtmr14                   | N/A | N/A |
| 10540650 | Arpc4 /// Ttl3           | N/A | N/A |
| 10540659 | Ttl3 /// Arpc4           | N/A | N/A |
| 10540676 | Jagn1                    | N/A | N/A |
| 10540727 | Creld1                   | N/A | N/A |
| 10540785 | 6720456B07Rik            | N/A | N/A |
| 10540790 | Vhl                      | N/A | N/A |
| 10540795 | Irak2                    | N/A | N/A |
| 10540812 | Tatdn2                   | N/A | N/A |
| 10540822 | Slc6a11                  | N/A | N/A |
| 10540855 | Hrh1                     | N/A | N/A |
| 10540860 | Atg7 /// LOC100043926    | N/A | N/A |
| 10540880 | Syn2                     | N/A | N/A |
| 10540911 | Tsen2                    | N/A | N/A |
| 10540923 | Mkrn2                    | N/A | N/A |
| 10540931 | Raf1 /// D830050110Rik   | N/A | N/A |
| 10540991 | Rho                      | N/A | N/A |
| 10540999 | H2afz                    | N/A | N/A |
| 10541002 | D6Wsu116e                | N/A | N/A |
| 10541034 | Anubl1                   | N/A | N/A |
| 10541049 | March8                   | N/A | N/A |
| 10541061 | Olf211                   | N/A | N/A |
| 10541063 | Olf212                   | N/A | N/A |
| 10541065 | Olf213                   | N/A | N/A |
| 10541067 | Eif4a3 /// Gm8994        | N/A | N/A |
| 10541069 | Olf214                   | N/A | N/A |
| 10541075 | Cxcl12                   | N/A | N/A |
| 10541089 | 2900097C17Rik /// Gm7292 | N/A | N/A |
| 10541091 | Gemin6                   | N/A | N/A |
| 10541094 | Zfp637                   | N/A | N/A |
| 10541098 | Zfp239                   | N/A | N/A |
| 10541104 | Hnrnpf                   | N/A | N/A |
| 10541112 | Lasp1                    | N/A | N/A |

|          |                                         |     |     |
|----------|-----------------------------------------|-----|-----|
| 10541114 | Rasgef1a                                | N/A | N/A |
| 10541127 | ---                                     | N/A | N/A |
| 10541129 | LOC280487                               | N/A | N/A |
| 10541182 | Fbx14                                   | N/A | N/A |
| 10541184 | ---                                     | N/A | N/A |
| 10541186 | 3110021A11Rik                           | N/A | N/A |
| 10541188 | ---                                     | N/A | N/A |
| 10541214 | B4galnt3                                | N/A | N/A |
| 10541216 | Kdm5a                                   | N/A | N/A |
| 10541246 | Il17ra                                  | N/A | N/A |
| 10541260 | Cecr2                                   | N/A | N/A |
| 10541268 | Slc25a18                                | N/A | N/A |
| 10541279 | Bcl2l13                                 | N/A | N/A |
| 10541288 | Gm9878                                  | N/A | N/A |
| 10541301 | Tuba8                                   | N/A | N/A |
| 10541307 | Usp18                                   | N/A | N/A |
| 10541318 | Slc6a13                                 | N/A | N/A |
| 10541333 | Slc6a12                                 | N/A | N/A |
| 10541349 | ---                                     | N/A | N/A |
| 10541410 | Mug1                                    | N/A | N/A |
| 10541441 | Gm10319                                 | N/A | N/A |
| 10541446 | Mug2                                    | N/A | N/A |
| 10541448 | Mug-ps1 /// Mug2 /// Mug1               | N/A | N/A |
| 10541480 | Mug-ps1 /// Mug1                        | N/A | N/A |
| 10541482 | Nhp2l1                                  | N/A | N/A |
| 10541484 | M6pr /// M6pr-ps                        | N/A | N/A |
| 10541494 | Rps27a                                  | N/A | N/A |
| 10541513 | ---                                     | N/A | N/A |
| 10541520 | Rps15                                   | N/A | N/A |
| 10541522 | Rps2 /// Rps2-ps6 /// Gm5921 /// Gm6139 | N/A | N/A |
| 10541532 | Foxj2                                   | N/A | N/A |
| 10541545 | Necap1                                  | N/A | N/A |
| 10541625 | ---                                     | N/A | N/A |
| 10541627 | ---                                     | N/A | N/A |
| 10541632 | Vmn2r23                                 | N/A | N/A |
| 10541634 | Vmn2r24                                 | N/A | N/A |
| 10541642 | ---                                     | N/A | N/A |
| 10541670 | C1rl                                    | N/A | N/A |
| 10541678 | C1ra                                    | N/A | N/A |
| 10541683 | C1ra /// C1rb                           | N/A | N/A |
| 10541695 | Lpcat3                                  | N/A | N/A |
| 10541711 | Phb2                                    | N/A | N/A |
| 10541721 | Spsb2                                   | N/A | N/A |
| 10541738 | A230083G16Rik                           | N/A | N/A |
| 10541741 | Mlf2                                    | N/A | N/A |
| 10541751 | ---                                     | N/A | N/A |
| 10541753 | C530028O21Rik                           | N/A | N/A |
| 10541762 | Zfp384                                  | N/A | N/A |
| 10541771 | Ing4                                    | N/A | N/A |
| 10541799 | Lpar5                                   | N/A | N/A |
| 10541803 | Chd4                                    | N/A | N/A |
| 10541845 | Nop2                                    | N/A | N/A |
| 10541862 | Iffo1                                   | N/A | N/A |
| 10541873 | Mrpl51                                  | N/A | N/A |
| 10541877 | Vamp1                                   | N/A | N/A |
| 10541885 | Scnn1a                                  | N/A | N/A |
| 10541895 | Tnfrsf1a                                | N/A | N/A |
| 10542006 | D6Wsu163e                               | N/A | N/A |
| 10542021 | ---                                     | N/A | N/A |
| 10542034 | ---                                     | N/A | N/A |
| 10542036 | Gm10414                                 | N/A | N/A |
| 10542038 | Hmgb1                                   | N/A | N/A |
| 10542040 | Parp11                                  | N/A | N/A |
| 10542050 | Efcab4b                                 | N/A | N/A |
| 10542060 | ---                                     | N/A | N/A |
| 10542077 | Rpl18                                   | N/A | N/A |
| 10542093 | Nrip2                                   | N/A | N/A |
| 10542104 | Gm10069                                 | N/A | N/A |
| 10542108 | Tom1                                    | N/A | N/A |
| 10542112 | Clec2h                                  | N/A | N/A |
| 10542156 | Clec2d                                  | N/A | N/A |
| 10542164 | Clec12a                                 | N/A | N/A |
| 10542172 | Clec1b                                  | N/A | N/A |
| 10542200 | Gabarapl1                               | N/A | N/A |
| 10542221 | Mir680-1                                | N/A | N/A |
| 10542229 | ---                                     | N/A | N/A |
| 10542237 | ---                                     | N/A | N/A |
| 10542239 | Prp2                                    | N/A | N/A |
| 10542241 | Tas2r120                                | N/A | N/A |
| 10542245 | Tas2r102                                | N/A | N/A |
| 10542249 | Tas2r123                                | N/A | N/A |
| 10542251 | Tas2r116                                | N/A | N/A |
| 10542253 | Tas2r110                                | N/A | N/A |
| 10542255 | Tas2r113                                | N/A | N/A |



|          |                             |     |     |
|----------|-----------------------------|-----|-----|
| 10542257 | Tas2r125                    | N/A | N/A |
| 10542264 | 2700089E24Rik               | N/A | N/A |
| 10542275 | Etv6                        | N/A | N/A |
| 10542297 | Loh12cr1                    | N/A | N/A |
| 10542302 | Crebl2                      | N/A | N/A |
| 10542317 | Cdkn1b                      | N/A | N/A |
| 10542319 | Apold1                      | N/A | N/A |
| 10542321 | Ddx47                       | N/A | N/A |
| 10542340 | 8430419L09Rik               | N/A | N/A |
| 10542365 | ---                         | N/A | N/A |
| 10542367 | ---                         | N/A | N/A |
| 10542369 | Gm8994                      | N/A | N/A |
| 10542371 | ---                         | N/A | N/A |
| 10542374 | ---                         | N/A | N/A |
| 10542376 | 1110034A24Rik /// Rpl36al   | N/A | N/A |
| 10542395 | Atf7ip                      | N/A | N/A |
| 10542414 | Ptpro                       | N/A | N/A |
| 10542445 | Strap                       | N/A | N/A |
| 10542460 | Dera                        | N/A | N/A |
| 10542470 | Mgst1                       | N/A | N/A |
| 10542518 | ---                         | N/A | N/A |
| 10542520 | Atp5h /// Gm4953 /// Gm5048 | N/A | N/A |
| 10542555 | MGC7817                     | N/A | N/A |
| 10542573 | BC005705                    | N/A | N/A |
| 10542592 | Gm10400                     | N/A | N/A |
| 10542594 | Gm10210                     | N/A | N/A |
| 10542596 | Slco1c1                     | N/A | N/A |
| 10542615 | Slco1b2                     | N/A | N/A |
| 10542636 | Pyroxd1 /// Recql           | N/A | N/A |
| 10542650 | Golt1b                      | N/A | N/A |
| 10542656 | B230216G23Rik               | N/A | N/A |
| 10542665 | Cmas                        | N/A | N/A |
| 10542674 | ---                         | N/A | N/A |
| 10542677 | Etnk1                       | N/A | N/A |
| 10542714 | Lyrn5 /// Kras              | N/A | N/A |
| 10542722 | Rps25 /// Gm4963            | N/A | N/A |
| 10542731 | Rassf8                      | N/A | N/A |
| 10542738 | Rassf8                      | N/A | N/A |
| 10542740 | Sspn                        | N/A | N/A |
| 10542745 | Fgfr1op2                    | N/A | N/A |
| 10542750 | Med21                       | N/A | N/A |
| 10542757 | Stk38l                      | N/A | N/A |
| 10542762 | ---                         | N/A | N/A |
| 10542764 | Arntl2                      | N/A | N/A |
| 10542824 | Mrps35                      | N/A | N/A |
| 10542834 | Gm5887                      | N/A | N/A |
| 10542836 | Klhdc5                      | N/A | N/A |
| 10542840 | E330012B07Rik               | N/A | N/A |
| 10542857 | Far2                        | N/A | N/A |
| 10542875 | 3010003L21Rik               | N/A | N/A |
| 10542878 | ---                         | N/A | N/A |
| 10542880 | 4833442J19Rik               | N/A | N/A |
| 10542885 | 2810474O19Rik               | N/A | N/A |
| 10542892 | Nacc1                       | N/A | N/A |
| 10542894 | ---                         | N/A | N/A |
| 10542896 | Bicd1                       | N/A | N/A |
| 10542911 | Samd9l                      | N/A | N/A |
| 10542929 | Calcr                       | N/A | N/A |
| 10542951 | Mir489                      | N/A | N/A |
| 10542953 | Tfpi2                       | N/A | N/A |
| 10542959 | Bet1                        | N/A | N/A |
| 10542965 | Sgce                        | N/A | N/A |
| 10542981 | Gmfg                        | N/A | N/A |
| 10542983 | Pon1                        | N/A | N/A |
| 10542993 | Pon3                        | N/A | N/A |
| 10543004 | Pon2                        | N/A | N/A |
| 10543029 | LOC280487                   | N/A | N/A |
| 10543031 | Slc25a13                    | N/A | N/A |
| 10543052 | Rps27a                      | N/A | N/A |
| 10543054 | Shfm1                       | N/A | N/A |
| 10543058 | Dlx5                        | N/A | N/A |
| 10543067 | Asns                        | N/A | N/A |
| 10543080 | Rnps1                       | N/A | N/A |
| 10543118 | Glcci1                      | N/A | N/A |
| 10543120 | Ica1                        | N/A | N/A |
| 10543134 | Ndufa4                      | N/A | N/A |
| 10543145 | Thsd7a                      | N/A | N/A |
| 10543213 | B630005N14Rik               | N/A | N/A |
| 10543226 | 2610001J05Rik               | N/A | N/A |
| 10543231 | ---                         | N/A | N/A |
| 10543302 | ---                         | N/A | N/A |
| 10543304 | ---                         | N/A | N/A |
| 10543306 | Tspan12                     | N/A | N/A |
| 10543317 | Rpl21                       | N/A | N/A |

|          |                                 |     |     |
|----------|---------------------------------|-----|-----|
| 10543333 | Aass                            | N/A | N/A |
| 10543358 | ---                             | N/A | N/A |
| 10543360 | ---                             | N/A | N/A |
| 10543362 | Fezf1                           | N/A | N/A |
| 10543402 | Rnf133                          | N/A | N/A |
| 10543407 | Rnf148                          | N/A | N/A |
| 10543409 | Tas2r118                        | N/A | N/A |
| 10543448 | Wasl                            | N/A | N/A |
| 10543460 | Tmem229a                        | N/A | N/A |
| 10543464 | Rpl7a                           | N/A | N/A |
| 10543471 | Pot1a                           | N/A | N/A |
| 10543492 | ---                             | N/A | N/A |
| 10543494 | Grm8                            | N/A | N/A |
| 10543510 | Mir592                          | N/A | N/A |
| 10543522 | ---                             | N/A | N/A |
| 10543524 | Gcc1 /// Fscn3                  | N/A | N/A |
| 10543544 | Lrrc4                           | N/A | N/A |
| 10543549 | ---                             | N/A | N/A |
| 10543572 | Impdh1                          | N/A | N/A |
| 10543650 | Tnpo3                           | N/A | N/A |
| 10543676 | 1700080G18Rik                   | N/A | N/A |
| 10543678 | ---                             | N/A | N/A |
| 10543682 | Mir96                           | N/A | N/A |
| 10543695 | ---                             | N/A | N/A |
| 10543697 | Zc3hc1                          | N/A | N/A |
| 10543725 | Tsga14                          | N/A | N/A |
| 10543737 | Copg2                           | N/A | N/A |
| 10543781 | Mir29b-1                        | N/A | N/A |
| 10543783 | Pma3                            | N/A | N/A |
| 10543785 | AB041803                        | N/A | N/A |
| 10543802 | Ptxna4                          | N/A | N/A |
| 10543835 | Chchd3                          | N/A | N/A |
| 10543846 | Slc35b4                         | N/A | N/A |
| 10543859 | Akr1b3 /// Gm6644               | N/A | N/A |
| 10543870 | Npn2                            | N/A | N/A |
| 10543872 | 3110062M04Rik /// Tmem140       | N/A | N/A |
| 10543904 | Cnot4                           | N/A | N/A |
| 10543944 | Mtpn                            | N/A | N/A |
| 10543967 | Dgki                            | N/A | N/A |
| 10544002 | Creb3l2                         | N/A | N/A |
| 10544015 | Ybx1                            | N/A | N/A |
| 10544062 | D630045J12Rik                   | N/A | N/A |
| 10544084 | Zc3hav1l                        | N/A | N/A |
| 10544089 | Zc3hav1                         | N/A | N/A |
| 10544106 | ---                             | N/A | N/A |
| 10544114 | Hipk2                           | N/A | N/A |
| 10544133 | Parp12                          | N/A | N/A |
| 10544148 | Jhdm1d                          | N/A | N/A |
| 10544150 | Jhdm1d                          | N/A | N/A |
| 10544171 | Slc37a3                         | N/A | N/A |
| 10544186 | Mktn1                           | N/A | N/A |
| 10544197 | ---                             | N/A | N/A |
| 10544199 | Dennd2a                         | N/A | N/A |
| 10544219 | Braf                            | N/A | N/A |
| 10544248 | ---                             | N/A | N/A |
| 10544252 | E330009J07Rik                   | N/A | N/A |
| 10544271 | Olfr461                         | N/A | N/A |
| 10544284 | Tas2r138                        | N/A | N/A |
| 10544406 | Fam131b                         | N/A | N/A |
| 10544417 | Epha1                           | N/A | N/A |
| 10544436 | Olfr458                         | N/A | N/A |
| 10544438 | Olfr457 /// Olfr456 /// Olfr458 | N/A | N/A |
| 10544440 | Olfr457                         | N/A | N/A |
| 10544442 | Olfr455                         | N/A | N/A |
| 10544462 | Fam115a                         | N/A | N/A |
| 10544497 | Tarbp2                          | N/A | N/A |
| 10544499 | Cul1                            | N/A | N/A |
| 10544501 | Ezh2                            | N/A | N/A |
| 10544523 | Rny1                            | N/A | N/A |
| 10544525 | Pdia4 /// Mir704                | N/A | N/A |
| 10544538 | ---                             | N/A | N/A |
| 10544540 | Rpl35a /// Ino80 /// Gm10247    | N/A | N/A |
| 10544547 | Zfp777                          | N/A | N/A |
| 10544555 | Zfp746                          | N/A | N/A |
| 10544570 | Pcnp                            | N/A | N/A |
| 10544573 | Lrrc61 /// Rarres2              | N/A | N/A |
| 10544583 | Gimap6                          | N/A | N/A |
| 10544596 | Tmem176b                        | N/A | N/A |
| 10544608 | ---                             | N/A | N/A |
| 10544629 | Tra2a                           | N/A | N/A |
| 10544638 | Tra2a                           | N/A | N/A |
| 10544640 | Tra2a                           | N/A | N/A |
| 10544642 | Gm10464                         | N/A | N/A |
| 10544644 | Dfna5                           | N/A | N/A |

|          |                                                      |     |     |
|----------|------------------------------------------------------|-----|-----|
| 10544687 | Cycs                                                 | N/A | N/A |
| 10544702 | ---                                                  | N/A | N/A |
| 10544720 | Hnrnpa2b1                                            | N/A | N/A |
| 10544774 | Hoxa6                                                | N/A | N/A |
| 10544795 | Mir196b                                              | N/A | N/A |
| 10544798 | Hoxa10                                               | N/A | N/A |
| 10544812 | Rpl38                                                | N/A | N/A |
| 10544815 | Hibadh                                               | N/A | N/A |
| 10544823 | ---                                                  | N/A | N/A |
| 10544827 | ---                                                  | N/A | N/A |
| 10544829 | Jazf1                                                | N/A | N/A |
| 10544837 | 1200009O22Rik /// Gm16499                            | N/A | N/A |
| 10544855 | Rpl29                                                | N/A | N/A |
| 10544875 | Scrn1                                                | N/A | N/A |
| 10544906 | Ggct                                                 | N/A | N/A |
| 10544932 | Inmt                                                 | N/A | N/A |
| 10544939 | ---                                                  | N/A | N/A |
| 10544941 | Pde1c                                                | N/A | N/A |
| 10544971 | Lsm5                                                 | N/A | N/A |
| 10544976 | Kbtbd2                                               | N/A | N/A |
| 10544982 | Nt5c3                                                | N/A | N/A |
| 10544993 | Vmn1r8 /// Vmn1r7                                    | N/A | N/A |
| 10544999 | Vmn1r18                                              | N/A | N/A |
| 10545001 | Ppm1k                                                | N/A | N/A |
| 10545009 | Pigy                                                 | N/A | N/A |
| 10545014 | Vopp1                                                | N/A | N/A |
| 10545028 | Vmn1r24                                              | N/A | N/A |
| 10545030 | Vmn1r25                                              | N/A | N/A |
| 10545032 | Vmn1r26                                              | N/A | N/A |
| 10545034 | ---                                                  | N/A | N/A |
| 10545036 | Vmn1r27                                              | N/A | N/A |
| 10545041 | Nap15                                                | N/A | N/A |
| 10545045 | Fam13a                                               | N/A | N/A |
| 10545065 | Gprin3                                               | N/A | N/A |
| 10545075 | ---                                                  | N/A | N/A |
| 10545096 | Mageb16 /// Mageb16-ps1                              | N/A | N/A |
| 10545099 | ---                                                  | N/A | N/A |
| 10545101 | Hpgds                                                | N/A | N/A |
| 10545117 | Vmn1r35 /// Vmn1r37 /// Vmn1r36 /// Vmn1r34          | N/A | N/A |
| 10545123 | Vmn1r38                                              | N/A | N/A |
| 10545125 | Rpl23                                                | N/A | N/A |
| 10545127 | Gng12                                                | N/A | N/A |
| 10545130 | Gadd45a                                              | N/A | N/A |
| 10545173 | LOC672291                                            | N/A | N/A |
| 10545175 | LOC672291 /// Igk-J1                                 | N/A | N/A |
| 10545177 | ---                                                  | N/A | N/A |
| 10545182 | Gm459                                                | N/A | N/A |
| 10545184 | Gm10880                                              | N/A | N/A |
| 10545187 | Gm1502 /// Gm8760 /// Igkv4-71                       | N/A | N/A |
| 10545192 | Rpr1                                                 | N/A | N/A |
| 10545194 | Gm8760 /// Igkv4-71                                  | N/A | N/A |
| 10545196 | Igk-C /// Gm1419 /// Gm10880 /// Igkv4-71 /// Gm1524 | N/A | N/A |
| 10545198 | Gm8760 /// Gm1499 /// Igkv4-71                       | N/A | N/A |
| 10545200 | ---                                                  | N/A | N/A |
| 10545208 | Gm189                                                | N/A | N/A |
| 10545226 | ---                                                  | N/A | N/A |
| 10545229 | U29423                                               | N/A | N/A |
| 10545231 | ---                                                  | N/A | N/A |
| 10545233 | Gm10883                                              | N/A | N/A |
| 10545255 | Rpia                                                 | N/A | N/A |
| 10545271 | Thnsl2                                               | N/A | N/A |
| 10545298 | Rmnd5a                                               | N/A | N/A |
| 10545337 | Ppia                                                 | N/A | N/A |
| 10545339 | Mrpl35                                               | N/A | N/A |
| 10545346 | Ptcd3                                                | N/A | N/A |
| 10545372 | Atoh8                                                | N/A | N/A |
| 10545379 | Usp39                                                | N/A | N/A |
| 10545394 | Rnf181                                               | N/A | N/A |
| 10545409 | Vamp8                                                | N/A | N/A |
| 10545417 | Mat2a                                                | N/A | N/A |
| 10545436 | Elmod3                                               | N/A | N/A |
| 10545458 | Tcf7l1                                               | N/A | N/A |
| 10545471 | Kcmf1                                                | N/A | N/A |
| 10545479 | Tmsb10                                               | N/A | N/A |
| 10545502 | Dnahc6                                               | N/A | N/A |
| 10545513 | ---                                                  | N/A | N/A |
| 10545528 | Pigp                                                 | N/A | N/A |
| 10545530 | Gm10450                                              | N/A | N/A |
| 10545534 | Rnf26                                                | N/A | N/A |
| 10545538 | Ctnna2                                               | N/A | N/A |
| 10545576 | Mrpl19 /// AW146020                                  | N/A | N/A |
| 10545583 | Pole4                                                | N/A | N/A |
| 10545608 | Sema4f                                               | N/A | N/A |
| 10545629 | Htra2 /// Loxl3                                      | N/A | N/A |

|          |                                                                             |     |     |
|----------|-----------------------------------------------------------------------------|-----|-----|
| 10545644 | Wbp1                                                                        | N/A | N/A |
| 10545651 | Ino80b                                                                      | N/A | N/A |
| 10545658 | Wdr54 /// Rtkn                                                              | N/A | N/A |
| 10545672 | Mthfd2                                                                      | N/A | N/A |
| 10545682 | Tet3                                                                        | N/A | N/A |
| 10545692 | Tet3                                                                        | N/A | N/A |
| 10545697 | Dguok                                                                       | N/A | N/A |
| 10545720 | Stambp                                                                      | N/A | N/A |
| 10545751 | Tex261                                                                      | N/A | N/A |
| 10545758 | ---                                                                         | N/A | N/A |
| 10545760 | Paip2b                                                                      | N/A | N/A |
| 10545765 | Gapdh /// Gm16374 /// Gm2606 /// Gm4609 /// Gm3200 /// Gm2451 /// Gm10293   | N/A | N/A |
| 10545768 | Gm10445                                                                     | N/A | N/A |
| 10545780 | Exoc6b                                                                      | N/A | N/A |
| 10545812 | Sfxn5                                                                       | N/A | N/A |
| 10545827 | Rab11fip5                                                                   | N/A | N/A |
| 10545862 | Cml3                                                                        | N/A | N/A |
| 10545865 | Cml3                                                                        | N/A | N/A |
| 10545874 | Cml3 /// Cml5                                                               | N/A | N/A |
| 10545881 | Cml2                                                                        | N/A | N/A |
| 10545891 | Cml1                                                                        | N/A | N/A |
| 10545895 | Nat8b                                                                       | N/A | N/A |
| 10545910 | Pcyox1                                                                      | N/A | N/A |
| 10545917 | Pcbp1                                                                       | N/A | N/A |
| 10545921 | Mxd1                                                                        | N/A | N/A |
| 10545930 | ---                                                                         | N/A | N/A |
| 10545932 | Snrnp27                                                                     | N/A | N/A |
| 10545940 | Gmcl1                                                                       | N/A | N/A |
| 10545974 | Antxr1                                                                      | N/A | N/A |
| 10546047 | LOC100503261                                                                | N/A | N/A |
| 10546054 | Rpl3                                                                        | N/A | N/A |
| 10546056 | Rab43                                                                       | N/A | N/A |
| 10546066 | Isy1                                                                        | N/A | N/A |
| 10546086 | ---                                                                         | N/A | N/A |
| 10546088 | H1fx                                                                        | N/A | N/A |
| 10546092 | Rab7                                                                        | N/A | N/A |
| 10546104 | Eefsec                                                                      | N/A | N/A |
| 10546113 | Sec61a1                                                                     | N/A | N/A |
| 10546137 | Abtb1                                                                       | N/A | N/A |
| 10546152 | Podxl2                                                                      | N/A | N/A |
| 10546184 | Plxna1                                                                      | N/A | N/A |
| 10546217 | Chchd6                                                                      | N/A | N/A |
| 10546227 | ---                                                                         | N/A | N/A |
| 10546229 | ---                                                                         | N/A | N/A |
| 10546231 | Vmn1r42                                                                     | N/A | N/A |
| 10546233 | Vmn1r43                                                                     | N/A | N/A |
| 10546238 | Vmn1r48                                                                     | N/A | N/A |
| 10546240 | Vmn1r49                                                                     | N/A | N/A |
| 10546242 | Vmn1r53                                                                     | N/A | N/A |
| 10546272 | lqsec1                                                                      | N/A | N/A |
| 10546292 | Rpl21 /// Rpl21-ps4 /// Rpl21-ps12 /// Gm9104 /// Rpl21-ps14 /// Rpl21-ps10 | N/A | N/A |
| 10546337 | ---                                                                         | N/A | N/A |
| 10546396 | Mrps25                                                                      | N/A | N/A |
| 10546402 | Zfyve20                                                                     | N/A | N/A |
| 10546417 | Trh                                                                         | N/A | N/A |
| 10546421 | Prickle2                                                                    | N/A | N/A |
| 10546430 | Adamts9                                                                     | N/A | N/A |
| 10546432 | Adamts9                                                                     | N/A | N/A |
| 10546450 | Adamts9                                                                     | N/A | N/A |
| 10546452 | Adamts9                                                                     | N/A | N/A |
| 10546476 | Magi1                                                                       | N/A | N/A |
| 10546508 | ---                                                                         | N/A | N/A |
| 10546510 | Lrig1                                                                       | N/A | N/A |
| 10546533 | ---                                                                         | N/A | N/A |
| 10546538 | Suclg2                                                                      | N/A | N/A |
| 10546551 | 1700123L14Rik                                                               | N/A | N/A |
| 10546567 | A130022J15Rik                                                               | N/A | N/A |
| 10546586 | Tmf1                                                                        | N/A | N/A |
| 10546606 | Uba3                                                                        | N/A | N/A |
| 10546631 | Frm4b                                                                       | N/A | N/A |
| 10546657 | ---                                                                         | N/A | N/A |
| 10546659 | ---                                                                         | N/A | N/A |
| 10546685 | Eif4e3                                                                      | N/A | N/A |
| 10546695 | Prok2                                                                       | N/A | N/A |
| 10546702 | Tpt1 /// Tpt1p                                                              | N/A | N/A |
| 10546706 | Rybp                                                                        | N/A | N/A |
| 10546710 | Shq1                                                                        | N/A | N/A |
| 10546736 | Cntn3                                                                       | N/A | N/A |
| 10546760 | Ddx3x                                                                       | N/A | N/A |
| 10546775 | Crbn                                                                        | N/A | N/A |
| 10546791 | Sumf1                                                                       | N/A | N/A |
| 10546801 | Rpl36 /// Gm13611                                                           | N/A | N/A |
| 10546803 | Gm10429 /// Itpr1                                                           | N/A | N/A |
| 10546805 | Ddx18                                                                       | N/A | N/A |

|          |                          |     |     |
|----------|--------------------------|-----|-----|
| 10546807 | ---                      | N/A | N/A |
| 10546829 | Oxtr                     | N/A | N/A |
| 10546832 | ---                      | N/A | N/A |
| 10546853 | Srgap3                   | N/A | N/A |
| 10546855 | Srgap3                   | N/A | N/A |
| 10546884 | Lhfp14                   | N/A | N/A |
| 10546889 | ---                      | N/A | N/A |
| 10546891 | Camk1                    | N/A | N/A |
| 10546919 | Rpusd3                   | N/A | N/A |
| 10546944 | Tmem111                  | N/A | N/A |
| 10546960 | ---                      | N/A | N/A |
| 10546962 | Ghrl                     | N/A | N/A |
| 10546967 | Sec13                    | N/A | N/A |
| 10546977 | Atp2b2                   | N/A | N/A |
| 10547009 | Vgll4                    | N/A | N/A |
| 10547015 | 1500001M20Rik            | N/A | N/A |
| 10547022 | Timp4                    | N/A | N/A |
| 10547030 | 2510049J12Rik            | N/A | N/A |
| 10547054 | ---                      | N/A | N/A |
| 10547073 | Snora7a                  | N/A | N/A |
| 10547075 | BC060267                 | N/A | N/A |
| 10547088 | Mbd4 /// lft122          | N/A | N/A |
| 10547140 | Tmcc1                    | N/A | N/A |
| 10547151 | Rpl27a /// Gm5908        | N/A | N/A |
| 10547171 | Olfr215                  | N/A | N/A |
| 10547173 | Zfp422                   | N/A | N/A |
| 10547200 | ---                      | N/A | N/A |
| 10547202 | ---                      | N/A | N/A |
| 10547204 | Hnrnpf /// 4933440N22Rik | N/A | N/A |
| 10547206 | Fxyd4                    | N/A | N/A |
| 10547217 | Csgalnact2               | N/A | N/A |
| 10547251 | Bms1                     | N/A | N/A |
| 10547274 | Zfp248                   | N/A | N/A |
| 10547282 | Zfp9                     | N/A | N/A |
| 10547288 | Ankrd26                  | N/A | N/A |
| 10547322 | Cacna1c                  | N/A | N/A |
| 10547381 | Lrtm2                    | N/A | N/A |
| 10547386 | Adipor2                  | N/A | N/A |
| 10547396 | Wnt5b                    | N/A | N/A |
| 10547404 | Erc1                     | N/A | N/A |
| 10547408 | Erc1                     | N/A | N/A |
| 10547410 | Erc1                     | N/A | N/A |
| 10547436 | Wnk1                     | N/A | N/A |
| 10547469 | Wnk1                     | N/A | N/A |
| 10547513 | Cecr5                    | N/A | N/A |
| 10547521 | Atp6v1e1                 | N/A | N/A |
| 10547531 | Bid                      | N/A | N/A |
| 10547540 | Mical3                   | N/A | N/A |
| 10547553 | Mical3                   | N/A | N/A |
| 10547575 | lqsec3                   | N/A | N/A |
| 10547597 | Phc1                     | N/A | N/A |
| 10547613 | Rimklb                   | N/A | N/A |
| 10547641 | Slc2a3                   | N/A | N/A |
| 10547655 | ---                      | N/A | N/A |
| 10547662 | Gm5316                   | N/A | N/A |
| 10547674 | Vmn2r22                  | N/A | N/A |
| 10547682 | Vmn2r22                  | N/A | N/A |
| 10547684 | Vmn2r22                  | N/A | N/A |
| 10547689 | Vmn2r26                  | N/A | N/A |
| 10547695 | Vmn2r27                  | N/A | N/A |
| 10547701 | Pex5                     | N/A | N/A |
| 10547719 | Clstn3                   | N/A | N/A |
| 10547752 | Gm5077                   | N/A | N/A |
| 10547758 | Emg1 /// Lpcat3          | N/A | N/A |
| 10547765 | Mir141                   | N/A | N/A |
| 10547767 | Mir200c                  | N/A | N/A |
| 10547789 | Ggcc10 /// Rnu7 /// Atn1 | N/A | N/A |
| 10547795 | Atn1 /// Rnu7            | N/A | N/A |
| 10547807 | Eno2                     | N/A | N/A |
| 10547830 | Tpi1                     | N/A | N/A |
| 10547837 | Usp5                     | N/A | N/A |
| 10547888 | Gpr162                   | N/A | N/A |
| 10547916 | Ptms                     | N/A | N/A |
| 10547924 | ---                      | N/A | N/A |
| 10547926 | Cops7a                   | N/A | N/A |
| 10547936 | Gapdh /// Gm2606         | N/A | N/A |
| 10547976 | Tapbpl                   | N/A | N/A |
| 10547993 | ---                      | N/A | N/A |
| 10548000 | Ltbr                     | N/A | N/A |
| 10548011 | Plekhg6                  | N/A | N/A |
| 10548030 | Cd9                      | N/A | N/A |
| 10548038 | Ntf3                     | N/A | N/A |
| 10548041 | Gm10415                  | N/A | N/A |
| 10548043 | Kcna5                    | N/A | N/A |

|          |                                                                |     |     |
|----------|----------------------------------------------------------------|-----|-----|
| 10548047 | Kcna1                                                          | N/A | N/A |
| 10548051 | Kcna6                                                          | N/A | N/A |
| 10548057 | Ndufa9                                                         | N/A | N/A |
| 10548105 | Ccnd2                                                          | N/A | N/A |
| 10548116 | ---                                                            | N/A | N/A |
| 10548118 | Prmt8                                                          | N/A | N/A |
| 10548128 | Tspan9                                                         | N/A | N/A |
| 10548139 | ---                                                            | N/A | N/A |
| 10548141 | Gm10010                                                        | N/A | N/A |
| 10548143 | Gapdh /// Gm16374 /// Gm4609 /// Gm3200 /// Gm2451 /// Gm10293 | N/A | N/A |
| 10548176 | 5930416119Rik                                                  | N/A | N/A |
| 10548180 | Itfg2                                                          | N/A | N/A |
| 10548194 | Fkbp4                                                          | N/A | N/A |
| 10548207 | Pzp                                                            | N/A | N/A |
| 10548244 | ---                                                            | N/A | N/A |
| 10548246 | Rpl21                                                          | N/A | N/A |
| 10548563 | Ptp4a1                                                         | N/A | N/A |
| 10548598 | ---                                                            | N/A | N/A |
| 10548600 | Hmgb1 /// Hmgb1l                                               | N/A | N/A |
| 10548606 | Tas2r107                                                       | N/A | N/A |
| 10548610 | Tas2r104                                                       | N/A | N/A |
| 10548612 | Tas2r105                                                       | N/A | N/A |
| 10548614 | Tas2r114                                                       | N/A | N/A |
| 10548661 | ---                                                            | N/A | N/A |
| 10548663 | Tas2r121                                                       | N/A | N/A |
| 10548665 | Tas2r115                                                       | N/A | N/A |
| 10548669 | Tas2r131                                                       | N/A | N/A |
| 10548671 | Tas2r109                                                       | N/A | N/A |
| 10548673 | Tas2r117                                                       | N/A | N/A |
| 10548675 | Tas2r103                                                       | N/A | N/A |
| 10548677 | Tas2r140                                                       | N/A | N/A |
| 10548679 | ---                                                            | N/A | N/A |
| 10548681 | ---                                                            | N/A | N/A |
| 10548684 | ---                                                            | N/A | N/A |
| 10548697 | ---                                                            | N/A | N/A |
| 10548699 | ---                                                            | N/A | N/A |
| 10548701 | Lrp6                                                           | N/A | N/A |
| 10548727 | D230041D01Rik /// LOC100502769                                 | N/A | N/A |
| 10548735 | Dusp16                                                         | N/A | N/A |
| 10548752 | ---                                                            | N/A | N/A |
| 10548761 | Hebp1                                                          | N/A | N/A |
| 10548785 | Dynlt1a /// Dynlt1b /// Dynlt1c /// Dynlt1f                    | N/A | N/A |
| 10548788 | ---                                                            | N/A | N/A |
| 10548791 | Grin2b                                                         | N/A | N/A |
| 10548808 | ---                                                            | N/A | N/A |
| 10548815 | Coq2                                                           | N/A | N/A |
| 10548817 | Pldb1                                                          | N/A | N/A |
| 10548857 | Hist4h4                                                        | N/A | N/A |
| 10548859 | Wbp11                                                          | N/A | N/A |
| 10548875 | Art4                                                           | N/A | N/A |
| 10548879 | Mgp                                                            | N/A | N/A |
| 10548905 | Eps8                                                           | N/A | N/A |
| 10548940 | Lmo3                                                           | N/A | N/A |
| 10548948 | Igfbp1b                                                        | N/A | N/A |
| 10548976 | Rpl38                                                          | N/A | N/A |
| 10548978 | Slco1a1                                                        | N/A | N/A |
| 10548996 | Slco1a4                                                        | N/A | N/A |
| 10549079 | Gys2                                                           | N/A | N/A |
| 10549162 | St8sia1                                                        | N/A | N/A |
| 10549171 | 5730419109Rik                                                  | N/A | N/A |
| 10549219 | ---                                                            | N/A | N/A |
| 10549222 | Bcat1                                                          | N/A | N/A |
| 10549276 | Bhlhe41                                                        | N/A | N/A |
| 10549282 | Itpr2                                                          | N/A | N/A |
| 10549341 | 4933424B01Rik                                                  | N/A | N/A |
| 10549361 | Tm7sf3                                                         | N/A | N/A |
| 10549375 | Rps26 /// Gm6654                                               | N/A | N/A |
| 10549402 | Ergic2 /// Far2                                                | N/A | N/A |
| 10549420 | Tmtc1                                                          | N/A | N/A |
| 10549445 | ---                                                            | N/A | N/A |
| 10549447 | Ipo8                                                           | N/A | N/A |
| 10549495 | Rps29                                                          | N/A | N/A |
| 10549497 | Fam60a                                                         | N/A | N/A |
| 10549504 | Dennd5b                                                        | N/A | N/A |
| 10549506 | Dennd5b                                                        | N/A | N/A |
| 10549530 | ---                                                            | N/A | N/A |
| 10549532 | ---                                                            | N/A | N/A |
| 10549534 | ---                                                            | N/A | N/A |
| 10549536 | Amn1                                                           | N/A | N/A |
| 10549544 | Gm10388                                                        | N/A | N/A |
| 10549552 | Prpf31                                                         | N/A | N/A |
| 10549569 | Cnot3 /// Leng1                                                | N/A | N/A |
| 10549582 | Tsen34                                                         | N/A | N/A |
| 10549588 | Rps9                                                           | N/A | N/A |

|          |                                                                        |     |     |
|----------|------------------------------------------------------------------------|-----|-----|
| 10549592 | ---                                                                    | N/A | N/A |
| 10549594 | Ttyh1                                                                  | N/A | N/A |
| 10549615 | Leng8                                                                  | N/A | N/A |
| 10549633 | Cdc42ep5                                                               | N/A | N/A |
| 10549653 | Atp6v0c                                                                | N/A | N/A |
| 10549679 | Brsk1 /// Tmem150b                                                     | N/A | N/A |
| 10549700 | Suv420h2                                                               | N/A | N/A |
| 10549714 | Rpl28                                                                  | N/A | N/A |
| 10549721 | ---                                                                    | N/A | N/A |
| 10549730 | Nat14                                                                  | N/A | N/A |
| 10549748 | Zfp524                                                                 | N/A | N/A |
| 10549758 | 4632433K11Rik /// Zfp784                                               | N/A | N/A |
| 10549760 | Zfp580                                                                 | N/A | N/A |
| 10549770 | U2af2                                                                  | N/A | N/A |
| 10549780 | Epn1                                                                   | N/A | N/A |
| 10549802 | Rps18 /// Gm5321 /// Gm10260                                           | N/A | N/A |
| 10549813 | Zfp444                                                                 | N/A | N/A |
| 10549849 | Zfp78                                                                  | N/A | N/A |
| 10549854 | Zfp28                                                                  | N/A | N/A |
| 10549862 | Olf1344 /// Gm16532                                                    | N/A | N/A |
| 10549871 | Olf1346                                                                | N/A | N/A |
| 10549875 | Olf1350                                                                | N/A | N/A |
| 10549877 | ---                                                                    | N/A | N/A |
| 10549879 | Usp29 /// Zim3                                                         | N/A | N/A |
| 10549899 | Zfp418                                                                 | N/A | N/A |
| 10549917 | Vmn2r43 /// Vmn2r35 /// Vmn2r33 /// Vmn2r39 /// Vmn2r50                | N/A | N/A |
| 10549921 | Vmn2r43 /// Vmn2r35 /// Vmn2r39 /// Vmn2r50                            | N/A | N/A |
| 10549932 | 2810047C21Rik1                                                         | N/A | N/A |
| 10549938 | Vmn2r42                                                                | N/A | N/A |
| 10549945 | Vmn1r67                                                                | N/A | N/A |
| 10549947 | Vmn1r70                                                                | N/A | N/A |
| 10549962 | ---                                                                    | N/A | N/A |
| 10549964 | Zscan4d /// Zscan4c /// Zscan4f /// Zscan4b /// Zscan4a /// Zscan4-ps2 | N/A | N/A |
| 10549972 | Zscan4d /// Zscan4c /// Zscan4f /// Zscan4b /// Zscan4a /// Zscan4-ps2 | N/A | N/A |
| 10549976 | ---                                                                    | N/A | N/A |
| 10549979 | ---                                                                    | N/A | N/A |
| 10549984 | Vmn1r74                                                                | N/A | N/A |
| 10549986 | Vmn1r75                                                                | N/A | N/A |
| 10549990 | Gm4741 /// V1rg10 /// Vmn1r2 /// Vmn1r3 /// Vmn1r238                   | N/A | N/A |
| 10549996 | Vmn1r82                                                                | N/A | N/A |
| 10550003 | Zfp606                                                                 | N/A | N/A |
| 10550029 | Zfp110                                                                 | N/A | N/A |
| 10550039 | Zfp128                                                                 | N/A | N/A |
| 10550059 | 2310014L17Rik                                                          | N/A | N/A |
| 10550062 | Zfp324                                                                 | N/A | N/A |
| 10550067 | Zfp446                                                                 | N/A | N/A |
| 10550076 | Trim28                                                                 | N/A | N/A |
| 10550098 | Wdr12                                                                  | N/A | N/A |
| 10550100 | Vmn1r89                                                                | N/A | N/A |
| 10550161 | ---                                                                    | N/A | N/A |
| 10550167 | ---                                                                    | N/A | N/A |
| 10550172 | Phf20                                                                  | N/A | N/A |
| 10550179 | ---                                                                    | N/A | N/A |
| 10550181 | ---                                                                    | N/A | N/A |
| 10550197 | Obox1                                                                  | N/A | N/A |
| 10550200 | ---                                                                    | N/A | N/A |
| 10550237 | Napa                                                                   | N/A | N/A |
| 10550274 | Meis3                                                                  | N/A | N/A |
| 10550296 | Zc3h4                                                                  | N/A | N/A |
| 10550316 | Tmem160                                                                | N/A | N/A |
| 10550320 | ---                                                                    | N/A | N/A |
| 10550345 | Strn4                                                                  | N/A | N/A |
| 10550383 | Dact3                                                                  | N/A | N/A |
| 10550400 | Pnmal2                                                                 | N/A | N/A |
| 10550402 | Pnmal1                                                                 | N/A | N/A |
| 10550451 | ---                                                                    | N/A | N/A |
| 10550482 | Igf13                                                                  | N/A | N/A |
| 10550494 | ---                                                                    | N/A | N/A |
| 10550509 | Pglyrp1                                                                | N/A | N/A |
| 10550514 | Nova2                                                                  | N/A | N/A |
| 10550519 | Nanos2                                                                 | N/A | N/A |
| 10550521 | Myppop                                                                 | N/A | N/A |
| 10550527 | Irf2bp1                                                                | N/A | N/A |
| 10550531 | Sympk                                                                  | N/A | N/A |
| 10550564 | Dmwd                                                                   | N/A | N/A |
| 10550574 | Dmpk                                                                   | N/A | N/A |
| 10550597 | Fbxo46                                                                 | N/A | N/A |
| 10550601 | Snrpd2 /// Gm10120                                                     | N/A | N/A |
| 10550605 | Emi2                                                                   | N/A | N/A |
| 10550625 | Mir330                                                                 | N/A | N/A |
| 10550627 | Gpr4                                                                   | N/A | N/A |
| 10550632 | Opa3                                                                   | N/A | N/A |
| 10550636 | ---                                                                    | N/A | N/A |
| 10550650 | Erc1 /// Cd3eap                                                        | N/A | N/A |

|          |                                       |     |     |
|----------|---------------------------------------|-----|-----|
| 10550660 | Ppp1r13l                              | N/A | N/A |
| 10550674 | Erc2 /// Klc3                         | N/A | N/A |
| 10550698 | Ckm                                   | N/A | N/A |
| 10550730 | Zfp296                                | N/A | N/A |
| 10550734 | Tomm40                                | N/A | N/A |
| 10550738 | Rpl7a-ps8                             | N/A | N/A |
| 10550760 | Vmn1r148                              | N/A | N/A |
| 10550768 | Vmn1r151                              | N/A | N/A |
| 10550770 | Vmn1r-ps79                            | N/A | N/A |
| 10550772 | Gm5156 /// Gm6882 /// Gm6176          | N/A | N/A |
| 10550782 | Vmn1r148                              | N/A | N/A |
| 10550805 | Vmn1r177 /// Vmn1r168                 | N/A | N/A |
| 10550824 | Vmn1r180                              | N/A | N/A |
| 10550826 | Vmn1r181                              | N/A | N/A |
| 10550831 | Vmn1r183                              | N/A | N/A |
| 10550833 | Zfp180                                | N/A | N/A |
| 10550847 | Zfp235                                | N/A | N/A |
| 10550860 | Zfp108                                | N/A | N/A |
| 10550865 | Zfp93                                 | N/A | N/A |
| 10550915 | Cadm4                                 | N/A | N/A |
| 10550931 | Irgq                                  | N/A | N/A |
| 10550972 | Phldb3                                | N/A | N/A |
| 10550978 | Phldb3                                | N/A | N/A |
| 10550994 | Ceacam10                              | N/A | N/A |
| 10551009 | Tmsb10                                | N/A | N/A |
| 10551065 | D930028M14Rik                         | N/A | N/A |
| 10551077 | Zfp526 /// 9130221H12Rik /// Gsk3a    | N/A | N/A |
| 10551080 | Cic                                   | N/A | N/A |
| 10551102 | Prr19                                 | N/A | N/A |
| 10551104 | Tmem145                               | N/A | N/A |
| 10551120 | Megf8                                 | N/A | N/A |
| 10551155 | Lipe /// 4732471J01Rik                | N/A | N/A |
| 10551162 | Atp5sl                                | N/A | N/A |
| 10551181 | B9d2                                  | N/A | N/A |
| 10551195 | ---                                   | N/A | N/A |
| 10551207 | ---                                   | N/A | N/A |
| 10551215 | Rnf170                                | N/A | N/A |
| 10551226 | Cyp2a5 /// Cyp2a4                     | N/A | N/A |
| 10551250 | ---                                   | N/A | N/A |
| 10551282 | Cyp2a5                                | N/A | N/A |
| 10551287 | Cyp2a12                               | N/A | N/A |
| 10551293 | Cyp2f2                                | N/A | N/A |
| 10551314 | BC024978                              | N/A | N/A |
| 10551319 | Adck4                                 | N/A | N/A |
| 10551336 | Numbl                                 | N/A | N/A |
| 10551393 | Akt2                                  | N/A | N/A |
| 10551401 | Ttc9b                                 | N/A | N/A |
| 10551410 | Zfp60                                 | N/A | N/A |
| 10551417 | Zfp780b /// 1700049G17Rik /// Gm10046 | N/A | N/A |
| 10551421 | Zfp60                                 | N/A | N/A |
| 10551423 | 4933426I21Rik                         | N/A | N/A |
| 10551426 | Zfp59                                 | N/A | N/A |
| 10551431 | Zfp607                                | N/A | N/A |
| 10551462 | ---                                   | N/A | N/A |
| 10551469 | Dyrk1b                                | N/A | N/A |
| 10551483 | Eid2                                  | N/A | N/A |
| 10551487 | Eid2b                                 | N/A | N/A |
| 10551489 | Rps16 /// Rps16-ps2                   | N/A | N/A |
| 10551496 | Paf1                                  | N/A | N/A |
| 10551529 | LOC100503763                          | N/A | N/A |
| 10551531 | Sycn                                  | N/A | N/A |
| 10551570 | Sirt2                                 | N/A | N/A |
| 10551600 | Hnrnp1                                | N/A | N/A |
| 10551614 | Ech1                                  | N/A | N/A |
| 10551714 | ---                                   | N/A | N/A |
| 10551716 | Ggn                                   | N/A | N/A |
| 10551724 | Yif1b                                 | N/A | N/A |
| 10551734 | ---                                   | N/A | N/A |
| 10551741 | Dpf1                                  | N/A | N/A |
| 10551750 | 4932431P20Rik                         | N/A | N/A |
| 10551752 | 4932431P20Rik                         | N/A | N/A |
| 10551758 | 6330444E15Rik                         | N/A | N/A |
| 10551760 | Zfp84                                 | N/A | N/A |
| 10551770 | Zfp30                                 | N/A | N/A |
| 10551777 | Zfp790                                | N/A | N/A |
| 10551801 | C230062116Rik                         | N/A | N/A |
| 10551803 | Zfp568                                | N/A | N/A |
| 10551815 | Zfp260                                | N/A | N/A |
| 10551822 | Zfp382                                | N/A | N/A |
| 10551828 | Gm5113                                | N/A | N/A |
| 10551836 | Cox7a1                                | N/A | N/A |
| 10551841 | Polr2i                                | N/A | N/A |
| 10551852 | Clip3                                 | N/A | N/A |
| 10551865 | Alkbh6                                | N/A | N/A |



|          |                                                               |     |     |
|----------|---------------------------------------------------------------|-----|-----|
| 10551872 | Al428936                                                      | N/A | N/A |
| 10551881 | Sdhaf1 /// E130208F15Rik                                      | N/A | N/A |
| 10551905 | Nphs1                                                         | N/A | N/A |
| 10551939 | Prodh2                                                        | N/A | N/A |
| 10551966 | Hspb6                                                         | N/A | N/A |
| 10551971 | U2af1l4 /// Tmem149                                           | N/A | N/A |
| 10551981 | Tmem149 /// U2af1l4                                           | N/A | N/A |
| 10551989 | Tmem149                                                       | N/A | N/A |
| 10551996 | ---                                                           | N/A | N/A |
| 10551998 | ---                                                           | N/A | N/A |
| 10552006 | Gm4883                                                        | N/A | N/A |
| 10552071 | Fam187b                                                       | N/A | N/A |
| 10552088 | Gm10640                                                       | N/A | N/A |
| 10552094 | Gm5326                                                        | N/A | N/A |
| 10552100 | ---                                                           | N/A | N/A |
| 10552104 | Gm6666 /// Gm5116                                             | N/A | N/A |
| 10552106 | ---                                                           | N/A | N/A |
| 10552108 | ---                                                           | N/A | N/A |
| 10552118 | LOC100504758                                                  | N/A | N/A |
| 10552121 | Dym /// Abpa                                                  | N/A | N/A |
| 10552125 | Pepd                                                          | N/A | N/A |
| 10552140 | Cebpa                                                         | N/A | N/A |
| 10552143 | Slc7a10 /// Lrp3                                              | N/A | N/A |
| 10552208 | Nudt19                                                        | N/A | N/A |
| 10552210 | Ankrd27                                                       | N/A | N/A |
| 10552240 | E13030402Rik /// Zfp507                                       | N/A | N/A |
| 10552242 | Rpl17 /// Gm10268 /// Rpl17-ps3                               | N/A | N/A |
| 10552245 | Tshz3                                                         | N/A | N/A |
| 10552249 | ---                                                           | N/A | N/A |
| 10552252 | 1600014C10Rik                                                 | N/A | N/A |
| 10552258 | ---                                                           | N/A | N/A |
| 10552260 | ---                                                           | N/A | N/A |
| 10552262 | ---                                                           | N/A | N/A |
| 10552264 | 9430025M13Rik                                                 | N/A | N/A |
| 10552276 | Ube2h /// Gm2058                                              | N/A | N/A |
| 10552284 | Pin4                                                          | N/A | N/A |
| 10552288 | Vstm2b                                                        | N/A | N/A |
| 10552311 | ---                                                           | N/A | N/A |
| 10552314 | Zfp141                                                        | N/A | N/A |
| 10552320 | Zfp788                                                        | N/A | N/A |
| 10552331 | Gprc2a-rs5                                                    | N/A | N/A |
| 10552335 | Gprc2a-rs5 /// Vmn2r58 /// Vmn2r60 /// Vmn2r61 /// Vmn2r-ps60 | N/A | N/A |
| 10552339 | Vmn2r60                                                       | N/A | N/A |
| 10552341 | Vmn2r60 /// Vmn2r61 /// Vmn2r59 /// Vmn2r-ps60                | N/A | N/A |
| 10552343 | ---                                                           | N/A | N/A |
| 10552348 | ---                                                           | N/A | N/A |
| 10552351 | ---                                                           | N/A | N/A |
| 10552353 | ---                                                           | N/A | N/A |
| 10552358 | EU599041                                                      | N/A | N/A |
| 10552363 | EU599041                                                      | N/A | N/A |
| 10552418 | Etfb                                                          | N/A | N/A |
| 10552440 | Zfp719                                                        | N/A | N/A |
| 10552458 | Ctu1                                                          | N/A | N/A |
| 10552613 | Klk1b4                                                        | N/A | N/A |
| 10552632 | Shank1                                                        | N/A | N/A |
| 10552656 | Syt3                                                          | N/A | N/A |
| 10552668 | Lrrc4b                                                        | N/A | N/A |
| 10552672 | Aspdh                                                         | N/A | N/A |
| 10552681 | Josd2                                                         | N/A | N/A |
| 10552725 | Vrk3                                                          | N/A | N/A |
| 10552740 | Nup62                                                         | N/A | N/A |
| 10552752 | Akt1s1                                                        | N/A | N/A |
| 10552758 | Mir707                                                        | N/A | N/A |
| 10552760 | Pnkp                                                          | N/A | N/A |
| 10552812 | Irf3                                                          | N/A | N/A |
| 10552824 | Rras                                                          | N/A | N/A |
| 10552843 | Mir150                                                        | N/A | N/A |
| 10552871 | Pth2                                                          | N/A | N/A |
| 10552929 | Mtag2 /// Lin7b                                               | N/A | N/A |
| 10552942 | Lhb                                                           | N/A | N/A |
| 10552945 | Gys1                                                          | N/A | N/A |
| 10552964 | Ftl2 /// Ftl1 /// Gm10252                                     | N/A | N/A |
| 10553015 | Bcat2                                                         | N/A | N/A |
| 10553080 | Car11                                                         | N/A | N/A |
| 10553115 | Lmtk3                                                         | N/A | N/A |
| 10553131 | Kdelr1                                                        | N/A | N/A |
| 10553140 | Tmem143                                                       | N/A | N/A |
| 10553163 | Nomo1                                                         | N/A | N/A |
| 10553197 | Ush1c /// Gm9860                                              | N/A | N/A |
| 10553261 | Kcnc1                                                         | N/A | N/A |
| 10553274 | Saa2                                                          | N/A | N/A |
| 10553280 | Gtf2h1                                                        | N/A | N/A |
| 10553299 | Iftm2                                                         | N/A | N/A |
| 10553301 | Ldha                                                          | N/A | N/A |

|          |                         |     |     |
|----------|-------------------------|-----|-----|
| 10553324 | Tmem86a                 | N/A | N/A |
| 10553334 | Mrgprb8                 | N/A | N/A |
| 10553336 | Zdhhc13                 | N/A | N/A |
| 10553399 | ---                     | N/A | N/A |
| 10553401 | F830223B06Rik           | N/A | N/A |
| 10553403 | Htatip2                 | N/A | N/A |
| 10553450 | Nell1                   | N/A | N/A |
| 10553471 | 4933405O20Rik           | N/A | N/A |
| 10553473 | ---                     | N/A | N/A |
| 10553475 | Rps27a                  | N/A | N/A |
| 10553501 | Slc17a6                 | N/A | N/A |
| 10553516 | Gapdh                   | N/A | N/A |
| 10553533 | Gm6181                  | N/A | N/A |
| 10553537 | Luzp2                   | N/A | N/A |
| 10553555 | ---                     | N/A | N/A |
| 10553559 | Siglech                 | N/A | N/A |
| 10553598 | Cyfp1                   | N/A | N/A |
| 10553635 | Nipa1 /// A230056P14Rik | N/A | N/A |
| 10553644 | ---                     | N/A | N/A |
| 10553646 | Herc2                   | N/A | N/A |
| 10553741 | ---                     | N/A | N/A |
| 10553769 | Gabra5 /// Gm9962       | N/A | N/A |
| 10553773 | Gabrb3                  | N/A | N/A |
| 10553786 | ---                     | N/A | N/A |
| 10553788 | Atp10a                  | N/A | N/A |
| 10553811 | ---                     | N/A | N/A |
| 10553813 | Ube3a                   | N/A | N/A |
| 10553829 | Fam100b /// Gm7367      | N/A | N/A |
| 10553831 | Fam100b /// Gm7367      | N/A | N/A |
| 10553833 | Ndn                     | N/A | N/A |
| 10553835 | Magel2                  | N/A | N/A |
| 10553840 | Atp5l                   | N/A | N/A |
| 10553842 | Otud7a                  | N/A | N/A |
| 10553857 | Hmgb1                   | N/A | N/A |
| 10553859 | ---                     | N/A | N/A |
| 10553895 | Mir211                  | N/A | N/A |
| 10553897 | Mtmr10                  | N/A | N/A |
| 10553913 | Mcee                    | N/A | N/A |
| 10553917 | Apba2                   | N/A | N/A |
| 10553956 | Tm2d3 /// Tarsi2        | N/A | N/A |
| 10553967 | Pcsk6                   | N/A | N/A |
| 10553993 | Snrpa1                  | N/A | N/A |
| 10554005 | H47                     | N/A | N/A |
| 10554013 | Chsy1                   | N/A | N/A |
| 10554057 | Adamts17                | N/A | N/A |
| 10554059 | Gm10622                 | N/A | N/A |
| 10554061 | Adamts17                | N/A | N/A |
| 10554074 | Adamts17                | N/A | N/A |
| 10554076 | Lysmd4                  | N/A | N/A |
| 10554081 | Ttc23                   | N/A | N/A |
| 10554094 | Igf1r                   | N/A | N/A |
| 10554118 | Fam169b                 | N/A | N/A |
| 10554127 | Gm5334                  | N/A | N/A |
| 10554129 | B130024G19Rik           | N/A | N/A |
| 10554140 | Zic4                    | N/A | N/A |
| 10554142 | 2310037I24Rik           | N/A | N/A |
| 10554150 | Rgma                    | N/A | N/A |
| 10554156 | Fam174b                 | N/A | N/A |
| 10554160 | Gm10618                 | N/A | N/A |
| 10554162 | ---                     | N/A | N/A |
| 10554164 | ---                     | N/A | N/A |
| 10554166 | Akap13                  | N/A | N/A |
| 10554198 | Klh25                   | N/A | N/A |
| 10554221 | Gm9885                  | N/A | N/A |
| 10554231 | Mir7-2                  | N/A | N/A |
| 10554269 | Abhd2                   | N/A | N/A |
| 10554321 | Gm10616                 | N/A | N/A |
| 10554323 | Mir9-3                  | N/A | N/A |
| 10554349 | Kif7 /// 9330171B17Rik  | N/A | N/A |
| 10554370 | Zfp710                  | N/A | N/A |
| 10554375 | Sema4b                  | N/A | N/A |
| 10554392 | D330012F22Rik           | N/A | N/A |
| 10554413 | Ngrn                    | N/A | N/A |
| 10554419 | Vps33b                  | N/A | N/A |
| 10554463 | Hddc3                   | N/A | N/A |
| 10554468 | ---                     | N/A | N/A |
| 10554475 | Zfp592                  | N/A | N/A |
| 10554521 | Pde8a                   | N/A | N/A |
| 10554547 | Mir1839                 | N/A | N/A |
| 10554549 | Whamm                   | N/A | N/A |
| 10554574 | Tm6sf1 /// Hdgfrp3      | N/A | N/A |
| 10554586 | 4833418N17Rik           | N/A | N/A |
| 10554629 | Eftud1                  | N/A | N/A |
| 10554655 | Mex3b                   | N/A | N/A |

|          |                    |     |     |
|----------|--------------------|-----|-----|
| 10554693 | Stard5             | N/A | N/A |
| 10554701 | Hnrnpk             | N/A | N/A |
| 10554704 | Mesdc2             | N/A | N/A |
| 10554710 | ---                | N/A | N/A |
| 10554712 | ---                | N/A | N/A |
| 10554714 | Olfr291            | N/A | N/A |
| 10554716 | Olfr290            | N/A | N/A |
| 10554721 | Olfr301            | N/A | N/A |
| 10554727 | Olfr297            | N/A | N/A |
| 10554729 | Olfr295            | N/A | N/A |
| 10554743 | ---                | N/A | N/A |
| 10554778 | Grm5               | N/A | N/A |
| 10554789 | Ctsc               | N/A | N/A |
| 10554814 | Prss23             | N/A | N/A |
| 10554817 | Gm10291            | N/A | N/A |
| 10554819 | Me3                | N/A | N/A |
| 10554837 | Eed                | N/A | N/A |
| 10554839 | Picalm             | N/A | N/A |
| 10554863 | Syt12              | N/A | N/A |
| 10554893 | Ccdc89             | N/A | N/A |
| 10554895 | Crebzf             | N/A | N/A |
| 10554900 | Dlg2               | N/A | N/A |
| 10554926 | Ccdc90b            | N/A | N/A |
| 10554938 | Rab30              | N/A | N/A |
| 10554945 | Prpc               | N/A | N/A |
| 10554958 | Gm10607            | N/A | N/A |
| 10554960 | Fam181b /// Gm9934 | N/A | N/A |
| 10554963 | ---                | N/A | N/A |
| 10554965 | ---                | N/A | N/A |
| 10554967 | Gm9966             | N/A | N/A |
| 10554969 | Odz4               | N/A | N/A |
| 10555007 | ---                | N/A | N/A |
| 10555009 | Mir708             | N/A | N/A |
| 10555011 | Nars2              | N/A | N/A |
| 10555027 | Gab2               | N/A | N/A |
| 10555039 | Kctd21             | N/A | N/A |
| 10555041 | Alg8               | N/A | N/A |
| 10555055 | Ndufc2             | N/A | N/A |
| 10555063 | Ints4              | N/A | N/A |
| 10555087 | ---                | N/A | N/A |
| 10555089 | Rsf1               | N/A | N/A |
| 10555108 | Clns1a             | N/A | N/A |
| 10555116 | Gm9990             | N/A | N/A |
| 10555118 | Pak1               | N/A | N/A |
| 10555174 | Lrrc32             | N/A | N/A |
| 10555177 | ---                | N/A | N/A |
| 10555179 | Prkrir             | N/A | N/A |
| 10555197 | Mtap6              | N/A | N/A |
| 10555233 | ---                | N/A | N/A |
| 10555235 | Arrb1              | N/A | N/A |
| 10555254 | Mir326             | N/A | N/A |
| 10555256 | Gm10605            | N/A | N/A |
| 10555258 | Olfr520            | N/A | N/A |
| 10555260 | Olfr521            | N/A | N/A |
| 10555293 | Lipt2              | N/A | N/A |
| 10555303 | Pgm211             | N/A | N/A |
| 10555339 | C2cd3              | N/A | N/A |
| 10555389 | Ucp2               | N/A | N/A |
| 10555407 | Chchd8             | N/A | N/A |
| 10555414 | Rab6               | N/A | N/A |
| 10555425 | Fam168a            | N/A | N/A |
| 10555438 | Fchsd2             | N/A | N/A |
| 10555460 | Stard10            | N/A | N/A |
| 10555510 | Pde2a              | N/A | N/A |
| 10555548 | Mir139             | N/A | N/A |
| 10555550 | Clpb               | N/A | N/A |
| 10555568 | Rpl31              | N/A | N/A |
| 10555574 | Inpp1              | N/A | N/A |
| 10555586 | 2400001E08Rik      | N/A | N/A |
| 10555590 | Numa1              | N/A | N/A |
| 10555671 | Pgap2              | N/A | N/A |
| 10555681 | Stim1              | N/A | N/A |
| 10555695 | Rrm1               | N/A | N/A |
| 10555716 | Olfr547            | N/A | N/A |
| 10555718 | ---                | N/A | N/A |
| 10555720 | Olfr549            | N/A | N/A |
| 10555725 | Olfr552            | N/A | N/A |
| 10555727 | Olfr554            | N/A | N/A |
| 10555729 | Olfr555            | N/A | N/A |
| 10555734 | Olfr557            | N/A | N/A |
| 10555744 | Olfr564            | N/A | N/A |
| 10555749 | Olfr570            | N/A | N/A |
| 10555751 | Olfr572            | N/A | N/A |
| 10555756 | Olfr576            | N/A | N/A |

|          |                                             |     |     |
|----------|---------------------------------------------|-----|-----|
| 10555758 | Olfr582                                     | N/A | N/A |
| 10555771 | Olfr592                                     | N/A | N/A |
| 10555773 | Olfr593                                     | N/A | N/A |
| 10555775 | Olfr594                                     | N/A | N/A |
| 10555777 | ---                                         | N/A | N/A |
| 10555781 | Olfr603 /// Olfr596                         | N/A | N/A |
| 10555783 | Olfr597                                     | N/A | N/A |
| 10555787 | Olfr599                                     | N/A | N/A |
| 10555789 | Usp1715                                     | N/A | N/A |
| 10555791 | Olfr606                                     | N/A | N/A |
| 10555793 | Olfr608                                     | N/A | N/A |
| 10555799 | Olfr615                                     | N/A | N/A |
| 10555801 | Olfr617                                     | N/A | N/A |
| 10555803 | Olfr618                                     | N/A | N/A |
| 10555805 | Olfr619                                     | N/A | N/A |
| 10555807 | Olfr617                                     | N/A | N/A |
| 10555818 | ---                                         | N/A | N/A |
| 10555832 | Olfr632                                     | N/A | N/A |
| 10555834 | Olfr633                                     | N/A | N/A |
| 10555836 | ---                                         | N/A | N/A |
| 10555838 | Olfr635                                     | N/A | N/A |
| 10555840 | Olfr638                                     | N/A | N/A |
| 10555842 | Olfr641                                     | N/A | N/A |
| 10555844 | Olfr646                                     | N/A | N/A |
| 10555846 | ---                                         | N/A | N/A |
| 10555870 | Olfr651                                     | N/A | N/A |
| 10555873 | Olfr652                                     | N/A | N/A |
| 10555875 | Olfr653                                     | N/A | N/A |
| 10555877 | Olfr654                                     | N/A | N/A |
| 10555879 | Olfr656                                     | N/A | N/A |
| 10555881 | Olfr657                                     | N/A | N/A |
| 10555883 | Olfr659                                     | N/A | N/A |
| 10555885 | ---                                         | N/A | N/A |
| 10555887 | Olfr661                                     | N/A | N/A |
| 10555892 | Twf1                                        | N/A | N/A |
| 10555899 | Olfr665                                     | N/A | N/A |
| 10555901 | Olfr669                                     | N/A | N/A |
| 10555903 | Olfr676                                     | N/A | N/A |
| 10555905 | Olfr677                                     | N/A | N/A |
| 10555907 | Olfr678                                     | N/A | N/A |
| 10555909 | Olfr679                                     | N/A | N/A |
| 10555911 | Olfr681 /// Olfr679                         | N/A | N/A |
| 10555913 | Olfr689 /// Olfr688 /// Olfr687             | N/A | N/A |
| 10555915 | Olfr689 /// Olfr688 /// Olfr687             | N/A | N/A |
| 10555917 | Olfr689                                     | N/A | N/A |
| 10555919 | Olfr692                                     | N/A | N/A |
| 10555921 | Gm5901                                      | N/A | N/A |
| 10555935 | Cckbr                                       | N/A | N/A |
| 10555946 | Smpd1                                       | N/A | N/A |
| 10556018 | ---                                         | N/A | N/A |
| 10556029 | Olfr703                                     | N/A | N/A |
| 10556033 | Olfr707 /// Olfr708                         | N/A | N/A |
| 10556035 | Olfr713                                     | N/A | N/A |
| 10556041 | Olfr716                                     | N/A | N/A |
| 10556059 | Rbmxl2                                      | N/A | N/A |
| 10556076 | Olfrml1                                     | N/A | N/A |
| 10556111 | Olfr467                                     | N/A | N/A |
| 10556117 | Olfr473                                     | N/A | N/A |
| 10556121 | Olfr476                                     | N/A | N/A |
| 10556123 | Olfr477                                     | N/A | N/A |
| 10556125 | ---                                         | N/A | N/A |
| 10556127 | Olfr479                                     | N/A | N/A |
| 10556129 | Olfr481                                     | N/A | N/A |
| 10556131 | Olfr483                                     | N/A | N/A |
| 10556133 | Styx                                        | N/A | N/A |
| 10556135 | ---                                         | N/A | N/A |
| 10556139 | Olfr494                                     | N/A | N/A |
| 10556141 | Olfr495                                     | N/A | N/A |
| 10556143 | Olfr497                                     | N/A | N/A |
| 10556145 | Olfr498                                     | N/A | N/A |
| 10556149 | Olfr658 /// Olfr503                         | N/A | N/A |
| 10556154 | Olfr506                                     | N/A | N/A |
| 10556156 | Olfr507                                     | N/A | N/A |
| 10556160 | Olfr510                                     | N/A | N/A |
| 10556165 | Olfr513                                     | N/A | N/A |
| 10556167 | ---                                         | N/A | N/A |
| 10556178 | Tub /// Ric3                                | N/A | N/A |
| 10556200 | Rpl27a /// Gm5908 /// Rpl27a-ps1 /// Gm5453 | N/A | N/A |
| 10556206 | Snora3                                      | N/A | N/A |
| 10556208 | D930014E17Rik                               | N/A | N/A |
| 10556214 | ---                                         | N/A | N/A |
| 10556216 | lpo7                                        | N/A | N/A |
| 10556242 | ---                                         | N/A | N/A |
| 10556246 | Zfp143                                      | N/A | N/A |

|          |                               |     |     |
|----------|-------------------------------|-----|-----|
| 10556295 | ---                           | N/A | N/A |
| 10556302 | Ampd3                         | N/A | N/A |
| 10556350 | Usp47                         | N/A | N/A |
| 10556381 | Mical2                        | N/A | N/A |
| 10556426 | Parva                         | N/A | N/A |
| 10556442 | Tead1                         | N/A | N/A |
| 10556456 | Tead1                         | N/A | N/A |
| 10556509 | Spon1                         | N/A | N/A |
| 10556528 | Pde3b                         | N/A | N/A |
| 10556571 | Rpl19                         | N/A | N/A |
| 10556573 | 1110006G14Rik                 | N/A | N/A |
| 10556576 | 1110004F10Rik                 | N/A | N/A |
| 10556581 | Gm10589                       | N/A | N/A |
| 10556583 | Nucb2                         | N/A | N/A |
| 10556598 | Xylt1                         | N/A | N/A |
| 10556611 | ---                           | N/A | N/A |
| 10556613 | 4930583K01Rik                 | N/A | N/A |
| 10556658 | 9030624J02Rik                 | N/A | N/A |
| 10556701 | Acsm5                         | N/A | N/A |
| 10556734 | Acsm1                         | N/A | N/A |
| 10556764 | Ppp1cc                        | N/A | N/A |
| 10556769 | Acsm3 /// Eri2                | N/A | N/A |
| 10556812 | Lyrn1                         | N/A | N/A |
| 10556820 | Tmem159                       | N/A | N/A |
| 10556828 | Anks4b                        | N/A | N/A |
| 10556938 | E130201H02Rik                 | N/A | N/A |
| 10556940 | Uqrcr2 /// Pdzd9              | N/A | N/A |
| 10556957 | BC030336                      | N/A | N/A |
| 10557009 | Eef2k                         | N/A | N/A |
| 10557033 | Eef2k                         | N/A | N/A |
| 10557035 | Polr3e                        | N/A | N/A |
| 10557058 | Polr3e                        | N/A | N/A |
| 10557106 | Hs3st2                        | N/A | N/A |
| 10557109 | 1700069B07Rik                 | N/A | N/A |
| 10557177 | Prkcb                         | N/A | N/A |
| 10557201 | Cacng3                        | N/A | N/A |
| 10557206 | Rbbp6                         | N/A | N/A |
| 10557211 | Rbbp6                         | N/A | N/A |
| 10557213 | Rbbp6                         | N/A | N/A |
| 10557229 | LOC100134980 /// LOC100504538 | N/A | N/A |
| 10557233 | Trnc6a                        | N/A | N/A |
| 10557285 | Lcmt1                         | N/A | N/A |
| 10557308 | Hs3st4                        | N/A | N/A |
| 10557311 | Gm16496                       | N/A | N/A |
| 10557313 | 4930533L02Rik                 | N/A | N/A |
| 10557315 | 4930571K23Rik                 | N/A | N/A |
| 10557317 | Jmjd5                         | N/A | N/A |
| 10557326 | Il4ra                         | N/A | N/A |
| 10557353 | D430042O09Rik                 | N/A | N/A |
| 10557355 | D430042O09Rik                 | N/A | N/A |
| 10557357 | D430042O09Rik                 | N/A | N/A |
| 10557359 | D430042O09Rik                 | N/A | N/A |
| 10557361 | D430042O09Rik                 | N/A | N/A |
| 10557372 | D430042O09Rik                 | N/A | N/A |
| 10557374 | D430042O09Rik                 | N/A | N/A |
| 10557394 | D430042O09Rik                 | N/A | N/A |
| 10557397 | D430042O09Rik                 | N/A | N/A |
| 10557432 | Eif3c                         | N/A | N/A |
| 10557439 | Ccdc101                       | N/A | N/A |
| 10557450 | Bola2                         | N/A | N/A |
| 10557455 | ---                           | N/A | N/A |
| 10557459 | Mapk3                         | N/A | N/A |
| 10557508 | Doc2a /// Ino80e              | N/A | N/A |
| 10557519 | Hirip3                        | N/A | N/A |
| 10557528 | Kctd13                        | N/A | N/A |
| 10557535 | Sez6l2                        | N/A | N/A |
| 10557560 | Cdipt                         | N/A | N/A |
| 10557585 | Zfp553                        | N/A | N/A |
| 10557587 | Zfp771                        | N/A | N/A |
| 10557624 | LOC100048345                  | N/A | N/A |
| 10557626 | ---                           | N/A | N/A |
| 10557628 | Zfp689                        | N/A | N/A |
| 10557631 | Prr14                         | N/A | N/A |
| 10557644 | Fbrs                          | N/A | N/A |
| 10557703 | Snora30                       | N/A | N/A |
| 10557705 | Phkg2 /// Gm166               | N/A | N/A |
| 10557716 | Rnf40                         | N/A | N/A |
| 10557738 | Ctf1                          | N/A | N/A |
| 10557742 | Fbxl19                        | N/A | N/A |
| 10557754 | Orai3                         | N/A | N/A |
| 10557758 | Setd1a                        | N/A | N/A |
| 10557780 | Setd1a                        | N/A | N/A |
| 10557793 | Stx4a                         | N/A | N/A |
| 10557806 | ---                           | N/A | N/A |

|          |                                                  |     |     |
|----------|--------------------------------------------------|-----|-----|
| 10557808 | Zfp646                                           | N/A | N/A |
| 10557831 | Myst1 /// Prss8                                  | N/A | N/A |
| 10557843 | Fus                                              | N/A | N/A |
| 10557853 | B230325K18Rik                                    | N/A | N/A |
| 10557925 | Ilgad                                            | N/A | N/A |
| 10557951 | Armc5                                            | N/A | N/A |
| 10557992 | Bag3                                             | N/A | N/A |
| 10558029 | Sec23ip                                          | N/A | N/A |
| 10558049 | Ppapdc1a                                         | N/A | N/A |
| 10558057 | Wdr11                                            | N/A | N/A |
| 10558088 | ---                                              | N/A | N/A |
| 10558134 | Plekha1                                          | N/A | N/A |
| 10558150 | Htra1                                            | N/A | N/A |
| 10558220 | Pstk                                             | N/A | N/A |
| 10558227 | Acadsb                                           | N/A | N/A |
| 10558239 | Hmx3                                             | N/A | N/A |
| 10558248 | Bub3                                             | N/A | N/A |
| 10558257 | Gpr26                                            | N/A | N/A |
| 10558263 | Gm10584                                          | N/A | N/A |
| 10558265 | Lhpp                                             | N/A | N/A |
| 10558274 | Fam175b                                          | N/A | N/A |
| 10558285 | Zranb1                                           | N/A | N/A |
| 10558295 | Zranb1                                           | N/A | N/A |
| 10558297 | 2700050L05Rik                                    | N/A | N/A |
| 10558325 | Bccip                                            | N/A | N/A |
| 10558345 | Dock1                                            | N/A | N/A |
| 10558398 | 5430417C01Rik                                    | N/A | N/A |
| 10558403 | 4930544L04Rik                                    | N/A | N/A |
| 10558436 | BC005624                                         | N/A | N/A |
| 10558439 | Phgdh                                            | N/A | N/A |
| 10558468 | Jakmip3                                          | N/A | N/A |
| 10558481 | Dpysl4                                           | N/A | N/A |
| 10558515 | Inpp5a                                           | N/A | N/A |
| 10558533 | ---                                              | N/A | N/A |
| 10558548 | Kndc1                                            | N/A | N/A |
| 10558583 | Zfp511                                           | N/A | N/A |
| 10558600 | Mtg1                                             | N/A | N/A |
| 10558612 | Olfir523                                         | N/A | N/A |
| 10558643 | Olfir527                                         | N/A | N/A |
| 10558645 | Olfir530                                         | N/A | N/A |
| 10558647 | Olfir535                                         | N/A | N/A |
| 10558649 | Olfir46 /// Olfir538 /// GA_x5J8B7TT63N-1148-873 | N/A | N/A |
| 10558653 | Olfir46                                          | N/A | N/A |
| 10558655 | Olfir46                                          | N/A | N/A |
| 10558657 | Olfir46 /// Olfir538 /// GA_x5J8B7TT63N-1148-873 | N/A | N/A |
| 10558659 | Olfir46                                          | N/A | N/A |
| 10558664 | Olfir53                                          | N/A | N/A |
| 10558666 | Olfir539                                         | N/A | N/A |
| 10558668 | Olfir45                                          | N/A | N/A |
| 10558673 | Cyp2e1                                           | N/A | N/A |
| 10558687 | 1190003J15Rik                                    | N/A | N/A |
| 10558707 | Ric8                                             | N/A | N/A |
| 10558740 | ---                                              | N/A | N/A |
| 10558742 | Nlrp6                                            | N/A | N/A |
| 10558754 | Ath1                                             | N/A | N/A |
| 10558769 | Ifitm1                                           | N/A | N/A |
| 10558773 | B4galnt4                                         | N/A | N/A |
| 10558811 | Ptdss2                                           | N/A | N/A |
| 10558840 | Rassf7                                           | N/A | N/A |
| 10558847 | Phrf1                                            | N/A | N/A |
| 10558872 | Tmem80                                           | N/A | N/A |
| 10558880 | Eps812 /// B230206H07Rik                         | N/A | N/A |
| 10558903 | Taldo1                                           | N/A | N/A |
| 10558910 | Rangrf                                           | N/A | N/A |
| 10558914 | Rplp2                                            | N/A | N/A |
| 10558921 | Pnpla2                                           | N/A | N/A |
| 10558948 | Cd151                                            | N/A | N/A |
| 10558971 | Ap2a2                                            | N/A | N/A |
| 10559172 | Krtap5-3                                         | N/A | N/A |
| 10559175 | Krtap5-5 /// Krtap5-4                            | N/A | N/A |
| 10559179 | E330027M22Rik                                    | N/A | N/A |
| 10559200 | Tnni2                                            | N/A | N/A |
| 10559233 | Mrpl23                                           | N/A | N/A |
| 10559238 | Igf2 /// Igf2as                                  | N/A | N/A |
| 10559261 | Cd81                                             | N/A | N/A |
| 10559270 | Tssc4                                            | N/A | N/A |
| 10559297 | Slc22a18                                         | N/A | N/A |
| 10559310 | ---                                              | N/A | N/A |
| 10559312 | Dhcr7                                            | N/A | N/A |
| 10559333 | Shank2                                           | N/A | N/A |
| 10559341 | Shank2                                           | N/A | N/A |
| 10559357 | ---                                              | N/A | N/A |
| 10559359 | Gm10152                                          | N/A | N/A |
| 10559385 | Mrgprf                                           | N/A | N/A |

|          |                                                                     |     |     |
|----------|---------------------------------------------------------------------|-----|-----|
| 10559389 | Mrgprd                                                              | N/A | N/A |
| 10559406 | Tfpt                                                                | N/A | N/A |
| 10559420 | Tmc4                                                                | N/A | N/A |
| 10559436 | Mboat7                                                              | N/A | N/A |
| 10559486 | Lair1                                                               | N/A | N/A |
| 10559498 | 9430041J12Rik                                                       | N/A | N/A |
| 10559500 | D030047H15Rik                                                       | N/A | N/A |
| 10559504 | Leng9                                                               | N/A | N/A |
| 10559509 | Cdc42ep5                                                            | N/A | N/A |
| 10559513 | Cab39                                                               | N/A | N/A |
| 10559516 | Rdh13                                                               | N/A | N/A |
| 10559524 | Ppp1r12c                                                            | N/A | N/A |
| 10559568 | 6030429G01Rik /// Tnni3                                             | N/A | N/A |
| 10559580 | Syt5                                                                | N/A | N/A |
| 10559606 | Tmem86b                                                             | N/A | N/A |
| 10559635 | Hspbp1                                                              | N/A | N/A |
| 10559644 | Brsk1                                                               | N/A | N/A |
| 10559673 | 2210411K11Rik                                                       | N/A | N/A |
| 10559676 | Ube2s                                                               | N/A | N/A |
| 10559681 | Shisa7                                                              | N/A | N/A |
| 10559687 | Isoc2b                                                              | N/A | N/A |
| 10559708 | Fiz1                                                                | N/A | N/A |
| 10559713 | 4632433K11Rik /// Zfp784                                            | N/A | N/A |
| 10559720 | Rasl2-9-ps                                                          | N/A | N/A |
| 10559728 | ---                                                                 | N/A | N/A |
| 10559743 | Vmn1r56                                                             | N/A | N/A |
| 10559754 | Vmn1r64                                                             | N/A | N/A |
| 10559762 | ---                                                                 | N/A | N/A |
| 10559766 | Zfp583                                                              | N/A | N/A |
| 10559782 | Olf1r5                                                              | N/A | N/A |
| 10559784 | Olf1r1347                                                           | N/A | N/A |
| 10559786 | Olf1r1348                                                           | N/A | N/A |
| 10559788 | Olf1r1349                                                           | N/A | N/A |
| 10559790 | Zim1                                                                | N/A | N/A |
| 10559796 | Peg3                                                                | N/A | N/A |
| 10559816 | ---                                                                 | N/A | N/A |
| 10559820 | 5730403M16Rik                                                       | N/A | N/A |
| 10559825 | Zfp773                                                              | N/A | N/A |
| 10559837 | Vmn2r29                                                             | N/A | N/A |
| 10559853 | Cicn4-2                                                             | N/A | N/A |
| 10559871 | Vmn2r42                                                             | N/A | N/A |
| 10559878 | 2810047C21Rik1                                                      | N/A | N/A |
| 10559883 | Vmn2r42                                                             | N/A | N/A |
| 10559890 | Vmn2r43 /// Vmn2r35 /// Vmn2r39 /// Vmn2r50                         | N/A | N/A |
| 10559894 | Vmn2r37 /// Vmn2r51 /// Vmn2r48 /// Vmn2r34 /// Vmn2r35             | N/A | N/A |
| 10559901 | Vmn2r42                                                             | N/A | N/A |
| 10559908 | Vmn2r43 /// Vmn2r29 /// Vmn2r35 /// Vmn2r33 /// Vmn2r39 /// Vmn2r50 | N/A | N/A |
| 10559916 | ---                                                                 | N/A | N/A |
| 10559919 | Zfp772 /// 2810047C21Rik1                                           | N/A | N/A |
| 10559928 | Vmn2r51 /// Vmn2r48 /// Vmn2r34 /// Vmn2r29                         | N/A | N/A |
| 10559931 | Vmn2r43 /// Vmn2r35 /// Vmn2r33 /// Vmn2r39 /// Vmn2r50             | N/A | N/A |
| 10559964 | Zik1                                                                | N/A | N/A |
| 10559983 | ---                                                                 | N/A | N/A |
| 10559996 | ---                                                                 | N/A | N/A |
| 10560000 | Tpm3                                                                | N/A | N/A |
| 10560013 | Vmn1r76                                                             | N/A | N/A |
| 10560019 | Vmn1r83                                                             | N/A | N/A |
| 10560021 | Vmn1r84                                                             | N/A | N/A |
| 10560023 | Zfp551                                                              | N/A | N/A |
| 10560028 | Vmn2r54                                                             | N/A | N/A |
| 10560035 | Zscan18                                                             | N/A | N/A |
| 10560043 | Zfp329                                                              | N/A | N/A |
| 10560045 | Slc27a5                                                             | N/A | N/A |
| 10560063 | Chmp2a                                                              | N/A | N/A |
| 10560070 | Ube2m                                                               | N/A | N/A |
| 10560087 | Vmn1r85                                                             | N/A | N/A |
| 10560089 | Vmn1r86                                                             | N/A | N/A |
| 10560094 | ---                                                                 | N/A | N/A |
| 10560097 | 6330408A02Rik /// Lig1                                              | N/A | N/A |
| 10560103 | Rps8                                                                | N/A | N/A |
| 10560131 | 2810007J24Rik                                                       | N/A | N/A |
| 10560160 | Obox5 /// Obox3 /// Gm4745 /// Gm5889                               | N/A | N/A |
| 10560174 | Sepw1                                                               | N/A | N/A |
| 10560202 | Gltsr1                                                              | N/A | N/A |
| 10560260 | Sae1                                                                | N/A | N/A |
| 10560282 | Grif1                                                               | N/A | N/A |
| 10560292 | ---                                                                 | N/A | N/A |
| 10560294 | Ceacam15                                                            | N/A | N/A |
| 10560298 | ---                                                                 | N/A | N/A |
| 10560300 | Fkrp                                                                | N/A | N/A |
| 10560304 | Calm3                                                               | N/A | N/A |
| 10560311 | ---                                                                 | N/A | N/A |
| 10560315 | Ppp5c                                                               | N/A | N/A |
| 10560354 | Kctd20                                                              | N/A | N/A |

|          |                                                                                                     |     |     |
|----------|-----------------------------------------------------------------------------------------------------|-----|-----|
| 10560356 | ---                                                                                                 | N/A | N/A |
| 10560399 | ---                                                                                                 | N/A | N/A |
| 10560429 | Myop /// Gm10676                                                                                    | N/A | N/A |
| 10560431 | Foxa3                                                                                               | N/A | N/A |
| 10560434 | Qpctl                                                                                               | N/A | N/A |
| 10560487 | Cd3eap                                                                                              | N/A | N/A |
| 10560510 | Mark4                                                                                               | N/A | N/A |
| 10560528 | ---                                                                                                 | N/A | N/A |
| 10560530 | Bloc1s3                                                                                             | N/A | N/A |
| 10560532 | Lrrc68                                                                                              | N/A | N/A |
| 10560551 | Clasrp                                                                                              | N/A | N/A |
| 10560592 | Clptm1                                                                                              | N/A | N/A |
| 10560608 | Apoc2                                                                                               | N/A | N/A |
| 10560614 | Apoc4 /// Apoc2                                                                                     | N/A | N/A |
| 10560624 | Apoe                                                                                                | N/A | N/A |
| 10560630 | Tomm40                                                                                              | N/A | N/A |
| 10560655 | Bcam                                                                                                | N/A | N/A |
| 10560685 | Bcl3                                                                                                | N/A | N/A |
| 10560709 | Pvr                                                                                                 | N/A | N/A |
| 10560726 | ---                                                                                                 | N/A | N/A |
| 10560728 | Vmn1r122 /// Vmn1r101 /// Vmn1r158 /// Vmn1r113 /// Vmn1r117 /// Vmn1r129 /// Vmn1r149 /// Vmn1r119 | N/A | N/A |
| 10560742 | Vmn1r151                                                                                            | N/A | N/A |
| 10560744 | Vmn1r158 /// Vmn1r113 /// Vmn1r117 /// Vmn1r129 /// Vmn1r119                                        | N/A | N/A |
| 10560752 | Vmn1r148                                                                                            | N/A | N/A |
| 10560758 | Gm4141 /// Vmn1r111 /// Vmn1r118                                                                    | N/A | N/A |
| 10560760 | Gm5891 /// Gm5156 /// Gm6882 /// Gm6176                                                             | N/A | N/A |
| 10560764 | Gm5156 /// Gm6882 /// Gm6176                                                                        | N/A | N/A |
| 10560771 | Gm4141 /// Vmn1r111 /// Vmn1r118                                                                    | N/A | N/A |
| 10560773 | Gm5891 /// Gm5156 /// Gm6882 /// Gm6176                                                             | N/A | N/A |
| 10560777 | Gm5156 /// Gm6882 /// Gm6176                                                                        | N/A | N/A |
| 10560780 | Vmn1r122 /// Vmn1r101 /// Vmn1r158 /// Vmn1r113 /// Vmn1r117 /// Vmn1r129 /// Vmn1r149 /// Vmn1r119 | N/A | N/A |
| 10560789 | Gm4141                                                                                              | N/A | N/A |
| 10560795 | Vmn1r101 /// Vmn1r158 /// Vmn1r113 /// Vmn1r117 /// Vmn1r129 /// Vmn1r149 /// Vmn1r119              | N/A | N/A |
| 10560801 | Gm4141 /// Vmn1r111 /// Vmn1r118                                                                    | N/A | N/A |
| 10560803 | Gm5891 /// Gm5156 /// Gm6882                                                                        | N/A | N/A |
| 10560807 | Gm5156 /// Gm6882 /// Gm6176                                                                        | N/A | N/A |
| 10560810 | Vmn1r171 /// Vmn1r170 /// Vmn1r175 /// Vmn1r169 /// Vmn1r176 /// Vmn1r167                           | N/A | N/A |
| 10560814 | Vmn1r177 /// Vmn1r168                                                                               | N/A | N/A |
| 10560816 | Atp5g2                                                                                              | N/A | N/A |
| 10560826 | Zfp109                                                                                              | N/A | N/A |
| 10560842 | Zfp94                                                                                               | N/A | N/A |
| 10560868 | Zfp575                                                                                              | N/A | N/A |
| 10560908 | Gm4881                                                                                              | N/A | N/A |
| 10560919 | Atp1a3                                                                                              | N/A | N/A |
| 10560945 | Grik5                                                                                               | N/A | N/A |
| 10560964 | Pou2f2                                                                                              | N/A | N/A |
| 10560993 | 9130221H12Rik /// Gsk3a                                                                             | N/A | N/A |
| 10561004 | Erf                                                                                                 | N/A | N/A |
| 10561008 | Ceacam1                                                                                             | N/A | N/A |
| 10561017 | Pafah1b3                                                                                            | N/A | N/A |
| 10561031 | Lipe                                                                                                | N/A | N/A |
| 10561063 | Bckdha                                                                                              | N/A | N/A |
| 10561073 | Tmem91                                                                                              | N/A | N/A |
| 10561078 | Ccdc97                                                                                              | N/A | N/A |
| 10561085 | Hnrrnpul1                                                                                           | N/A | N/A |
| 10561128 | Cyp2s1                                                                                              | N/A | N/A |
| 10561138 | Rpl37a                                                                                              | N/A | N/A |
| 10561140 | Mrpl41                                                                                              | N/A | N/A |
| 10561166 | ---                                                                                                 | N/A | N/A |
| 10561178 | Rab4b                                                                                               | N/A | N/A |
| 10561194 | Snrpa                                                                                               | N/A | N/A |
| 10561204 | Itpkc                                                                                               | N/A | N/A |
| 10561302 | Pgam1                                                                                               | N/A | N/A |
| 10561306 | Pld3                                                                                                | N/A | N/A |
| 10561323 | Map3k10                                                                                             | N/A | N/A |
| 10561335 | Prkcz                                                                                               | N/A | N/A |
| 10561337 | 1700049G17Rik                                                                                       | N/A | N/A |
| 10561343 | Josd1                                                                                               | N/A | N/A |
| 10561356 | Psmc4                                                                                               | N/A | N/A |
| 10561388 | Timm50                                                                                              | N/A | N/A |
| 10561401 | Supt5h                                                                                              | N/A | N/A |
| 10561456 | Med29                                                                                               | N/A | N/A |
| 10561461 | Samd4b                                                                                              | N/A | N/A |
| 10561474 | Ii28a                                                                                               | N/A | N/A |
| 10561485 | Pak4                                                                                                | N/A | N/A |
| 10561513 | Mrps12                                                                                              | N/A | N/A |
| 10561516 | Nfkbib                                                                                              | N/A | N/A |
| 10561525 | Gm10648                                                                                             | N/A | N/A |
| 10561527 | Actn4 /// Capn12                                                                                    | N/A | N/A |
| 10561552 | Eif3k                                                                                               | N/A | N/A |
| 10561664 | Fam98c                                                                                              | N/A | N/A |
| 10561673 | Spred3                                                                                              | N/A | N/A |
| 10561679 | Psmd8                                                                                               | N/A | N/A |
| 10561702 | Kcnk6                                                                                               | N/A | N/A |



|          |                                                                              |     |     |
|----------|------------------------------------------------------------------------------|-----|-----|
| 10561706 | Yif1b /// 2200002D01Rik                                                      | N/A | N/A |
| 10561712 | Spint2                                                                       | N/A | N/A |
| 10561721 | Sipa1l3                                                                      | N/A | N/A |
| 10561777 | BC027344                                                                     | N/A | N/A |
| 10561787 | Zfp27                                                                        | N/A | N/A |
| 10561799 | Zfp74                                                                        | N/A | N/A |
| 10561810 | Zfp14                                                                        | N/A | N/A |
| 10561831 | Zfp566 /// LOC100504880 /// Zfp82                                            | N/A | N/A |
| 10561842 | Capns1                                                                       | N/A | N/A |
| 10561854 | Tbcb                                                                         | N/A | N/A |
| 10561907 | Sdhaf1 /// E130208F15Rik                                                     | N/A | N/A |
| 10561918 | ---                                                                          | N/A | N/A |
| 10561927 | Aplp1                                                                        | N/A | N/A |
| 10561956 | Rps12 /// Gm10063 /// Rps12-ps2                                              | N/A | N/A |
| 10561958 | Arhgap33                                                                     | N/A | N/A |
| 10561983 | BC053749                                                                     | N/A | N/A |
| 10562000 | Psenen                                                                       | N/A | N/A |
| 10562044 | Zbtb32                                                                       | N/A | N/A |
| 10562059 | Cox6b1                                                                       | N/A | N/A |
| 10562093 | 4930479M11Rik                                                                | N/A | N/A |
| 10562096 | Tmem147                                                                      | N/A | N/A |
| 10562152 | Mag                                                                          | N/A | N/A |
| 10562166 | Hamp2                                                                        | N/A | N/A |
| 10562169 | Hamp                                                                         | N/A | N/A |
| 10562172 | Usf2                                                                         | N/A | N/A |
| 10562181 | Lsr                                                                          | N/A | N/A |
| 10562192 | Fxyd5                                                                        | N/A | N/A |
| 10562204 | Fxyd7                                                                        | N/A | N/A |
| 10562211 | Fxyd1                                                                        | N/A | N/A |
| 10562234 | Hpn                                                                          | N/A | N/A |
| 10562260 | Gramd1a                                                                      | N/A | N/A |
| 10562285 | ---                                                                          | N/A | N/A |
| 10562287 | Gm5329                                                                       | N/A | N/A |
| 10562289 | Gm5329                                                                       | N/A | N/A |
| 10562323 | Wtip                                                                         | N/A | N/A |
| 10562331 | Uba2                                                                         | N/A | N/A |
| 10562358 | ---                                                                          | N/A | N/A |
| 10562360 | Gpi1                                                                         | N/A | N/A |
| 10562368 | 4931406P16Rik                                                                | N/A | N/A |
| 10562382 | Lsm14a                                                                       | N/A | N/A |
| 10562397 | ---                                                                          | N/A | N/A |
| 10562408 | Chst8                                                                        | N/A | N/A |
| 10562416 | Cebpg                                                                        | N/A | N/A |
| 10562439 | Gpatch1                                                                      | N/A | N/A |
| 10562461 | C230052112Rik /// Rhpn2                                                      | N/A | N/A |
| 10562480 | Nudt19                                                                       | N/A | N/A |
| 10562491 | Pdcd5                                                                        | N/A | N/A |
| 10562500 | Dpy19l3                                                                      | N/A | N/A |
| 10562523 | Zfp507 /// E130304I02Rik                                                     | N/A | N/A |
| 10562546 | ---                                                                          | N/A | N/A |
| 10562576 | Plekhf1                                                                      | N/A | N/A |
| 10562578 | Pop4                                                                         | N/A | N/A |
| 10562599 | Gm5590                                                                       | N/A | N/A |
| 10562601 | ---                                                                          | N/A | N/A |
| 10562605 | A1987944                                                                     | N/A | N/A |
| 10562627 | Dullard                                                                      | N/A | N/A |
| 10562632 | Vmn2r-ps57                                                                   | N/A | N/A |
| 10562634 | ---                                                                          | N/A | N/A |
| 10562637 | Ccnb1                                                                        | N/A | N/A |
| 10562639 | Gapdh                                                                        | N/A | N/A |
| 10562641 | Vmn2r-ps57 /// Gprc2a-rs5 /// Vmn2r58 /// Vmn2r60 /// Vmn2r61 /// Vmn2r-ps60 | N/A | N/A |
| 10562643 | 4933421I07Rik                                                                | N/A | N/A |
| 10562647 | Rpl29                                                                        | N/A | N/A |
| 10562649 | ---                                                                          | N/A | N/A |
| 10562651 | Gm5595 /// EU599041 /// C330019L16Rik                                        | N/A | N/A |
| 10562657 | Gm5595                                                                       | N/A | N/A |
| 10562663 | Rps4x                                                                        | N/A | N/A |
| 10562665 | ---                                                                          | N/A | N/A |
| 10562667 | ---                                                                          | N/A | N/A |
| 10562685 | ---                                                                          | N/A | N/A |
| 10562709 | Cd33                                                                         | N/A | N/A |
| 10562729 | ---                                                                          | N/A | N/A |
| 10562754 | ---                                                                          | N/A | N/A |
| 10562761 | Clec11a                                                                      | N/A | N/A |
| 10562774 | 2310044H10Rik                                                                | N/A | N/A |
| 10562847 | Nr1h2                                                                        | N/A | N/A |
| 10562905 | Atf5 /// Nup62-il4i1                                                         | N/A | N/A |
| 10562911 | Tbc1d17                                                                      | N/A | N/A |
| 10562942 | Med25                                                                        | N/A | N/A |
| 10562963 | Fuz                                                                          | N/A | N/A |
| 10562965 | Ap2a1                                                                        | N/A | N/A |
| 10562989 | Cpt1c                                                                        | N/A | N/A |
| 10563014 | Prmt1                                                                        | N/A | N/A |
| 10563050 | Prr12                                                                        | N/A | N/A |

|          |                            |     |     |
|----------|----------------------------|-----|-----|
| 10563085 | Fcgrt                      | N/A | N/A |
| 10563094 | Rps11                      | N/A | N/A |
| 10563099 | Snord35b                   | N/A | N/A |
| 10563101 | Rpl13a                     | N/A | N/A |
| 10563110 | Rpl13a /// Snord34         | N/A | N/A |
| 10563112 | Snord33                    | N/A | N/A |
| 10563114 | Rpl13a /// Snord32a        | N/A | N/A |
| 10563130 | Aldh16a1                   | N/A | N/A |
| 10563176 | ---                        | N/A | N/A |
| 10563253 | Lin7b /// Mtag2            | N/A | N/A |
| 10563260 | Snrnp70                    | N/A | N/A |
| 10563275 | Ruvbl2 /// Gys1            | N/A | N/A |
| 10563295 | Ftl2 /// Ftl1 /// Mir692-1 | N/A | N/A |
| 10563314 | Dhdh                       | N/A | N/A |
| 10563323 | Nucb1                      | N/A | N/A |
| 10563362 | Sphk2                      | N/A | N/A |
| 10563373 | Spaca4                     | N/A | N/A |
| 10563387 | Gm5897                     | N/A | N/A |
| 10563411 | Grwd1                      | N/A | N/A |
| 10563421 | Grin2d                     | N/A | N/A |
| 10563434 | ---                        | N/A | N/A |
| 10563436 | Syngr4                     | N/A | N/A |
| 10563441 | Emp3                       | N/A | N/A |
| 10563558 | Sergef /// Prf1            | N/A | N/A |
| 10563583 | Saa1                       | N/A | N/A |
| 10563597 | Saa3                       | N/A | N/A |
| 10563602 | Saa4                       | N/A | N/A |
| 10563608 | ---                        | N/A | N/A |
| 10563611 | Saa2 /// Saa1              | N/A | N/A |
| 10563615 | Hps5                       | N/A | N/A |
| 10563641 | Gm9392 /// Rap1a           | N/A | N/A |
| 10563643 | Tsg101                     | N/A | N/A |
| 10563657 | ---                        | N/A | N/A |
| 10563659 | Spty2d1                    | N/A | N/A |
| 10563685 | Ptpn5                      | N/A | N/A |
| 10563712 | Mrgpra2a /// Mrgpra2b      | N/A | N/A |
| 10563722 | Mrgpra3 /// Mrgpra2a       | N/A | N/A |
| 10563743 | ---                        | N/A | N/A |
| 10563745 | Mrgprb5                    | N/A | N/A |
| 10563764 | Mrgprb3                    | N/A | N/A |
| 10563766 | ---                        | N/A | N/A |
| 10563768 | ---                        | N/A | N/A |
| 10563770 | Csrp3                      | N/A | N/A |
| 10563802 | ---                        | N/A | N/A |
| 10563804 | ---                        | N/A | N/A |
| 10563806 | ---                        | N/A | N/A |
| 10563808 | ---                        | N/A | N/A |
| 10563810 | ---                        | N/A | N/A |
| 10563812 | ---                        | N/A | N/A |
| 10563814 | ---                        | N/A | N/A |
| 10563816 | Fancf /// Gas2             | N/A | N/A |
| 10563820 | Svip                       | N/A | N/A |
| 10563825 | ---                        | N/A | N/A |
| 10563829 | Mrps33                     | N/A | N/A |
| 10563834 | ---                        | N/A | N/A |
| 10563838 | Nipa2 /// Cyfip1           | N/A | N/A |
| 10563852 | Nipa1 /// A230056P14Rik    | N/A | N/A |
| 10563858 | Gabrg3                     | N/A | N/A |
| 10563872 | Gabra5                     | N/A | N/A |
| 10563891 | Nck2                       | N/A | N/A |
| 10563893 | ---                        | N/A | N/A |
| 10563895 | ---                        | N/A | N/A |
| 10563897 | ---                        | N/A | N/A |
| 10563899 | ---                        | N/A | N/A |
| 10563901 | ---                        | N/A | N/A |
| 10563903 | ---                        | N/A | N/A |
| 10563905 | ---                        | N/A | N/A |
| 10563907 | ---                        | N/A | N/A |
| 10563909 | ---                        | N/A | N/A |
| 10563911 | ---                        | N/A | N/A |
| 10563913 | ---                        | N/A | N/A |
| 10563915 | ---                        | N/A | N/A |
| 10563917 | ---                        | N/A | N/A |
| 10563919 | ---                        | N/A | N/A |
| 10563921 | ---                        | N/A | N/A |
| 10563923 | ---                        | N/A | N/A |
| 10563925 | ---                        | N/A | N/A |
| 10563927 | ---                        | N/A | N/A |
| 10563929 | ---                        | N/A | N/A |
| 10563931 | ---                        | N/A | N/A |
| 10563933 | ---                        | N/A | N/A |
| 10563935 | ---                        | N/A | N/A |
| 10563937 | Snord115                   | N/A | N/A |
| 10563939 | ---                        | N/A | N/A |

|          |          |     |     |
|----------|----------|-----|-----|
| 10563941 | ---      | N/A | N/A |
| 10563943 | ---      | N/A | N/A |
| 10563945 | ---      | N/A | N/A |
| 10563947 | Snord115 | N/A | N/A |
| 10563949 | ---      | N/A | N/A |
| 10563951 | Snord115 | N/A | N/A |
| 10563953 | Snord115 | N/A | N/A |
| 10563955 | ---      | N/A | N/A |
| 10563957 | Snord115 | N/A | N/A |
| 10563959 | ---      | N/A | N/A |
| 10563961 | ---      | N/A | N/A |
| 10563963 | ---      | N/A | N/A |
| 10563965 | ---      | N/A | N/A |
| 10563967 | ---      | N/A | N/A |
| 10563969 | ---      | N/A | N/A |
| 10563971 | ---      | N/A | N/A |
| 10563973 | ---      | N/A | N/A |
| 10563975 | ---      | N/A | N/A |
| 10563977 | ---      | N/A | N/A |
| 10563979 | ---      | N/A | N/A |
| 10563981 | ---      | N/A | N/A |
| 10563983 | ---      | N/A | N/A |
| 10563985 | ---      | N/A | N/A |
| 10563987 | ---      | N/A | N/A |
| 10563989 | ---      | N/A | N/A |
| 10563991 | ---      | N/A | N/A |
| 10563993 | ---      | N/A | N/A |
| 10563995 | Snord115 | N/A | N/A |
| 10563997 | Snord115 | N/A | N/A |
| 10563999 | Snord115 | N/A | N/A |
| 10564001 | Snord115 | N/A | N/A |
| 10564003 | Snord115 | N/A | N/A |
| 10564005 | ---      | N/A | N/A |
| 10564007 | Snord115 | N/A | N/A |
| 10564009 | ---      | N/A | N/A |
| 10564011 | Snord115 | N/A | N/A |
| 10564013 | Snord115 | N/A | N/A |
| 10564015 | ---      | N/A | N/A |
| 10564017 | Snord115 | N/A | N/A |
| 10564019 | ---      | N/A | N/A |
| 10564021 | ---      | N/A | N/A |
| 10564023 | ---      | N/A | N/A |
| 10564025 | ---      | N/A | N/A |
| 10564027 | ---      | N/A | N/A |
| 10564029 | Snord115 | N/A | N/A |
| 10564031 | Snord115 | N/A | N/A |
| 10564033 | ---      | N/A | N/A |
| 10564035 | ---      | N/A | N/A |
| 10564037 | ---      | N/A | N/A |
| 10564039 | ---      | N/A | N/A |
| 10564041 | ---      | N/A | N/A |
| 10564043 | ---      | N/A | N/A |
| 10564045 | ---      | N/A | N/A |
| 10564047 | ---      | N/A | N/A |
| 10564049 | ---      | N/A | N/A |
| 10564051 | ---      | N/A | N/A |
| 10564053 | ---      | N/A | N/A |
| 10564055 | ---      | N/A | N/A |
| 10564057 | ---      | N/A | N/A |
| 10564059 | ---      | N/A | N/A |
| 10564061 | ---      | N/A | N/A |
| 10564063 | ---      | N/A | N/A |
| 10564065 | ---      | N/A | N/A |
| 10564067 | ---      | N/A | N/A |
| 10564069 | ---      | N/A | N/A |
| 10564071 | ---      | N/A | N/A |
| 10564073 | ---      | N/A | N/A |
| 10564075 | ---      | N/A | N/A |
| 10564077 | ---      | N/A | N/A |
| 10564079 | ---      | N/A | N/A |
| 10564081 | ---      | N/A | N/A |
| 10564083 | ---      | N/A | N/A |
| 10564085 | ---      | N/A | N/A |
| 10564087 | ---      | N/A | N/A |
| 10564089 | ---      | N/A | N/A |
| 10564091 | ---      | N/A | N/A |
| 10564093 | ---      | N/A | N/A |
| 10564095 | ---      | N/A | N/A |
| 10564097 | ---      | N/A | N/A |
| 10564099 | ---      | N/A | N/A |
| 10564101 | ---      | N/A | N/A |
| 10564103 | ---      | N/A | N/A |
| 10564105 | ---      | N/A | N/A |
| 10564107 | ---      | N/A | N/A |

|          |                                        |     |     |
|----------|----------------------------------------|-----|-----|
| 10564109 | ---                                    | N/A | N/A |
| 10564111 | ---                                    | N/A | N/A |
| 10564113 | ---                                    | N/A | N/A |
| 10564115 | ---                                    | N/A | N/A |
| 10564117 | ---                                    | N/A | N/A |
| 10564119 | ---                                    | N/A | N/A |
| 10564121 | ---                                    | N/A | N/A |
| 10564123 | ---                                    | N/A | N/A |
| 10564125 | ---                                    | N/A | N/A |
| 10564127 | ---                                    | N/A | N/A |
| 10564129 | ---                                    | N/A | N/A |
| 10564131 | ---                                    | N/A | N/A |
| 10564133 | ---                                    | N/A | N/A |
| 10564135 | ---                                    | N/A | N/A |
| 10564137 | ---                                    | N/A | N/A |
| 10564139 | ---                                    | N/A | N/A |
| 10564141 | ---                                    | N/A | N/A |
| 10564143 | ---                                    | N/A | N/A |
| 10564145 | ---                                    | N/A | N/A |
| 10564147 | ---                                    | N/A | N/A |
| 10564149 | ---                                    | N/A | N/A |
| 10564151 | ---                                    | N/A | N/A |
| 10564153 | ---                                    | N/A | N/A |
| 10564155 | ---                                    | N/A | N/A |
| 10564157 | ---                                    | N/A | N/A |
| 10564159 | ---                                    | N/A | N/A |
| 10564161 | Snord116 /// Snord116l1 /// Snord116l2 | N/A | N/A |
| 10564163 | Snord116 /// Snord116l1 /// Snord116l2 | N/A | N/A |
| 10564165 | ---                                    | N/A | N/A |
| 10564167 | Snord116 /// Snord116l1 /// Snord116l2 | N/A | N/A |
| 10564169 | ---                                    | N/A | N/A |
| 10564171 | Snord116 /// Snord116l1 /// Snord116l2 | N/A | N/A |
| 10564173 | Snord116 /// Snord116l1 /// Snord116l2 | N/A | N/A |
| 10564175 | Snord116 /// Snord116l1 /// Snord116l2 | N/A | N/A |
| 10564177 | Snord116                               | N/A | N/A |
| 10564179 | Snord116 /// Snord116l1 /// Snord116l2 | N/A | N/A |
| 10564181 | Snord116 /// Snord116l1 /// Snord116l2 | N/A | N/A |
| 10564183 | Snord116                               | N/A | N/A |
| 10564185 | Snord116 /// Snord116l1 /// Snord116l2 | N/A | N/A |
| 10564187 | Snord116 /// Snord116l1 /// Snord116l2 | N/A | N/A |
| 10564189 | Snord116 /// Snord116l1 /// Snord116l2 | N/A | N/A |
| 10564191 | Snord116 /// Snord116l1 /// Snord116l2 | N/A | N/A |
| 10564193 | Snord116 /// Snord116l1 /// Snord116l2 | N/A | N/A |
| 10564195 | Snord116 /// Snord116l1 /// Snord116l2 | N/A | N/A |
| 10564197 | Snord116 /// Snord116l1 /// Snord116l2 | N/A | N/A |
| 10564199 | Snord116 /// Snord116l1 /// Snord116l2 | N/A | N/A |
| 10564201 | Snord116                               | N/A | N/A |
| 10564203 | ---                                    | N/A | N/A |
| 10564205 | Snord116                               | N/A | N/A |
| 10564207 | Snord116                               | N/A | N/A |
| 10564209 | ---                                    | N/A | N/A |
| 10564211 | Snurf /// Snrpn                        | N/A | N/A |
| 10564220 | Gkap1                                  | N/A | N/A |
| 10564231 | ---                                    | N/A | N/A |
| 10564233 | Mir344 /// Mir344-2                    | N/A | N/A |
| 10564235 | Mir344 /// Mir344-2                    | N/A | N/A |
| 10564237 | Gm9801                                 | N/A | N/A |
| 10564260 | ---                                    | N/A | N/A |
| 10564272 | Chrna7                                 | N/A | N/A |
| 10564313 | Mphosph10                              | N/A | N/A |
| 10564326 | Fam189a1                               | N/A | N/A |
| 10564343 | Tjp1                                   | N/A | N/A |
| 10564373 | Gm10624                                | N/A | N/A |
| 10564375 | ---                                    | N/A | N/A |
| 10564434 | ---                                    | N/A | N/A |
| 10564436 | Asb7                                   | N/A | N/A |
| 10564448 | Asb7                                   | N/A | N/A |
| 10564451 | Mef2a                                  | N/A | N/A |
| 10564467 | Lrrc28                                 | N/A | N/A |
| 10564482 | Synm                                   | N/A | N/A |
| 10564500 | ---                                    | N/A | N/A |
| 10564520 | Snora21                                | N/A | N/A |
| 10564525 | ---                                    | N/A | N/A |
| 10564527 | Nr2f2                                  | N/A | N/A |
| 10564535 | ---                                    | N/A | N/A |
| 10564537 | Gm10295                                | N/A | N/A |
| 10564539 | Mctp2                                  | N/A | N/A |
| 10564563 | Rpl17 /// Gm10268 /// Rpl17-ps3        | N/A | N/A |
| 10564565 | ---                                    | N/A | N/A |
| 10564567 | ---                                    | N/A | N/A |
| 10564570 | ---                                    | N/A | N/A |
| 10564573 | Chd2                                   | N/A | N/A |
| 10564616 | Gm4971                                 | N/A | N/A |
| 10564618 | Fam174b                                | N/A | N/A |

|          |                                          |     |     |
|----------|------------------------------------------|-----|-----|
| 10564622 | ---                                      | N/A | N/A |
| 10564624 | St8sia2                                  | N/A | N/A |
| 10564631 | Slco3a1                                  | N/A | N/A |
| 10564646 | Sv2b                                     | N/A | N/A |
| 10564663 | Gm9855 /// Tdg /// Gm5806                | N/A | N/A |
| 10564667 | Ntrk3                                    | N/A | N/A |
| 10564692 | Mrpl46                                   | N/A | N/A |
| 10564736 | Polg                                     | N/A | N/A |
| 10564791 | Kif7 /// 9330171B17Rik                   | N/A | N/A |
| 10564805 | Pex11a                                   | N/A | N/A |
| 10564809 | Eif1 /// Gm16378 /// Gm6900              | N/A | N/A |
| 10564818 | Anpep                                    | N/A | N/A |
| 10564839 | Ap3s2                                    | N/A | N/A |
| 10564849 | 2610034B18Rik                            | N/A | N/A |
| 10564857 | Idh2                                     | N/A | N/A |
| 10564869 | Cib1                                     | N/A | N/A |
| 10564888 | Unc45a                                   | N/A | N/A |
| 10564909 | Man2a2                                   | N/A | N/A |
| 10564960 | Furin                                    | N/A | N/A |
| 10565057 | Wdr73                                    | N/A | N/A |
| 10565067 | Nmb                                      | N/A | N/A |
| 10565081 | Timm17a                                  | N/A | N/A |
| 10565083 | Rps17 /// Gm6402                         | N/A | N/A |
| 10565089 | Cpeb1                                    | N/A | N/A |
| 10565102 | Ap3b2                                    | N/A | N/A |
| 10565170 | 3110040N11Rik                            | N/A | N/A |
| 10565178 | Btb1                                     | N/A | N/A |
| 10565193 | Hdgfrp3 /// Tm6sf1                       | N/A | N/A |
| 10565210 | Fam154b                                  | N/A | N/A |
| 10565216 | Gm10610                                  | N/A | N/A |
| 10565250 | Mesdc1                                   | N/A | N/A |
| 10565288 | Fam108c                                  | N/A | N/A |
| 10565292 | Arnt2                                    | N/A | N/A |
| 10565315 | Fah                                      | N/A | N/A |
| 10565330 | Zfand6                                   | N/A | N/A |
| 10565341 | Gm6155                                   | N/A | N/A |
| 10565343 | Vmn2r65                                  | N/A | N/A |
| 10565353 | Vmn2r68-ps                               | N/A | N/A |
| 10565360 | ---                                      | N/A | N/A |
| 10565379 | Olf310                                   | N/A | N/A |
| 10565381 | ---                                      | N/A | N/A |
| 10565383 | Olf309                                   | N/A | N/A |
| 10565389 | Olf307                                   | N/A | N/A |
| 10565391 | Olf305                                   | N/A | N/A |
| 10565395 | Olf303                                   | N/A | N/A |
| 10565399 | Olf294                                   | N/A | N/A |
| 10565401 | Folh1                                    | N/A | N/A |
| 10565434 | Rps13                                    | N/A | N/A |
| 10565437 | Tmem135                                  | N/A | N/A |
| 10565461 | Me3                                      | N/A | N/A |
| 10565479 | I7Rn6                                    | N/A | N/A |
| 10565486 | Eed                                      | N/A | N/A |
| 10565499 | Gm5341                                   | N/A | N/A |
| 10565514 | Tmem126a                                 | N/A | N/A |
| 10565519 | Tmem126b                                 | N/A | N/A |
| 10565525 | ---                                      | N/A | N/A |
| 10565528 | ---                                      | N/A | N/A |
| 10565532 | Ankrd42                                  | N/A | N/A |
| 10565547 | Pcf11                                    | N/A | N/A |
| 10565565 | ---                                      | N/A | N/A |
| 10565567 | 4632427E13Rik                            | N/A | N/A |
| 10565582 | Rps8 /// Gm5121 /// Gm11353 /// Rps8-ps1 | N/A | N/A |
| 10565587 | Gm5037 /// Fxn                           | N/A | N/A |
| 10565591 | ---                                      | N/A | N/A |
| 10565596 | ---                                      | N/A | N/A |
| 10565598 | LOC280487                                | N/A | N/A |
| 10565607 | ---                                      | N/A | N/A |
| 10565609 | Thrsp                                    | N/A | N/A |
| 10565612 | 1810020D17Rik                            | N/A | N/A |
| 10565689 | Capn5                                    | N/A | N/A |
| 10565727 | Tsku                                     | N/A | N/A |
| 10565735 | A630091E08Rik                            | N/A | N/A |
| 10565738 | 2210018M11Rik                            | N/A | N/A |
| 10565759 | Uvrage                                   | N/A | N/A |
| 10565775 | Dgat2                                    | N/A | N/A |
| 10565802 | Rps3                                     | N/A | N/A |
| 10565811 | Snord15b                                 | N/A | N/A |
| 10565813 | Snord15a                                 | N/A | N/A |
| 10565815 | Gm4980                                   | N/A | N/A |
| 10565817 | ---                                      | N/A | N/A |
| 10565819 | Slco2b1                                  | N/A | N/A |
| 10565846 | Spcs2                                    | N/A | N/A |
| 10565852 | Rnf169                                   | N/A | N/A |
| 10565858 | Gm5115                                   | N/A | N/A |

|          |                                     |     |     |
|----------|-------------------------------------|-----|-----|
| 10565862 | Pold3                               | N/A | N/A |
| 10565873 | Ppme1                               | N/A | N/A |
| 10565888 | Gm10603                             | N/A | N/A |
| 10565900 | D630004N19Rik /// Mrpl48            | N/A | N/A |
| 10565904 | Mrpl48                              | N/A | N/A |
| 10565921 | Gapdh /// Gm3200                    | N/A | N/A |
| 10565935 | Arhgef17                            | N/A | N/A |
| 10565958 | P2ry6                               | N/A | N/A |
| 10565962 | P2ry2                               | N/A | N/A |
| 10565994 | Art2b                               | N/A | N/A |
| 10565996 | Inpp1                               | N/A | N/A |
| 10566050 | Il18bp                              | N/A | N/A |
| 10566067 | Rnf121                              | N/A | N/A |
| 10566097 | Nup98                               | N/A | N/A |
| 10566132 | Rhog                                | N/A | N/A |
| 10566136 | Olf543                              | N/A | N/A |
| 10566140 | Olf545                              | N/A | N/A |
| 10566155 | ---                                 | N/A | N/A |
| 10566159 | Olf553                              | N/A | N/A |
| 10566182 | Olf566                              | N/A | N/A |
| 10566184 | Olf569                              | N/A | N/A |
| 10566186 | Olf571                              | N/A | N/A |
| 10566188 | ---                                 | N/A | N/A |
| 10566190 | Olf575                              | N/A | N/A |
| 10566194 | Olf578                              | N/A | N/A |
| 10566199 | Olf586                              | N/A | N/A |
| 10566201 | Olf589                              | N/A | N/A |
| 10566205 | Dub2a /// Usp-ps                    | N/A | N/A |
| 10566207 | Olf600                              | N/A | N/A |
| 10566209 | Olf601                              | N/A | N/A |
| 10566211 | Olf603                              | N/A | N/A |
| 10566215 | Olf607                              | N/A | N/A |
| 10566217 | Olf609                              | N/A | N/A |
| 10566219 | Olf610                              | N/A | N/A |
| 10566223 | Olf611 /// Olf612                   | N/A | N/A |
| 10566225 | Olf616                              | N/A | N/A |
| 10566227 | Olf620                              | N/A | N/A |
| 10566229 | Olf620 /// Olf624                   | N/A | N/A |
| 10566231 | Olf622                              | N/A | N/A |
| 10566239 | Olf629                              | N/A | N/A |
| 10566249 | Olf68                               | N/A | N/A |
| 10566281 | Dnajc19                             | N/A | N/A |
| 10566292 | Olf639                              | N/A | N/A |
| 10566294 | Olf640                              | N/A | N/A |
| 10566296 | Olf642                              | N/A | N/A |
| 10566300 | Olf644                              | N/A | N/A |
| 10566302 | Olf645                              | N/A | N/A |
| 10566322 | Olf648                              | N/A | N/A |
| 10566324 | Olf649                              | N/A | N/A |
| 10566333 | Trim12a /// Trim5 /// 9230105E10Rik | N/A | N/A |
| 10566346 | 9230105E10Rik                       | N/A | N/A |
| 10566366 | Trim30d                             | N/A | N/A |
| 10566395 | Dub1a                               | N/A | N/A |
| 10566398 | Olf666                              | N/A | N/A |
| 10566403 | Olf668                              | N/A | N/A |
| 10566405 | Mapksp1                             | N/A | N/A |
| 10566409 | Olf670                              | N/A | N/A |
| 10566411 | Olf671                              | N/A | N/A |
| 10566413 | Olf672                              | N/A | N/A |
| 10566417 | Olf675                              | N/A | N/A |
| 10566419 | ---                                 | N/A | N/A |
| 10566422 | ---                                 | N/A | N/A |
| 10566425 | Olf683                              | N/A | N/A |
| 10566430 | Olf685                              | N/A | N/A |
| 10566432 | Olf686                              | N/A | N/A |
| 10566434 | Olf690                              | N/A | N/A |
| 10566436 | Olf691                              | N/A | N/A |
| 10566438 | Fam160a2                            | N/A | N/A |
| 10566452 | Gm4972                              | N/A | N/A |
| 10566454 | Prkcdbp                             | N/A | N/A |
| 10566457 | Apbb1                               | N/A | N/A |
| 10566477 | Hpx                                 | N/A | N/A |
| 10566488 | Trim3                               | N/A | N/A |
| 10566502 | Arfp2                               | N/A | N/A |
| 10566512 | ---                                 | N/A | N/A |
| 10566514 | Mrps36                              | N/A | N/A |
| 10566516 | Rrp8                                | N/A | N/A |
| 10566525 | Taf10 /// Ilk                       | N/A | N/A |
| 10566529 | Tpp1                                | N/A | N/A |
| 10566543 | Dchs1                               | N/A | N/A |
| 10566564 | Mrpl17                              | N/A | N/A |
| 10566574 | Gvin1                               | N/A | N/A |
| 10566578 | Gvin1 /// Gm8979                    | N/A | N/A |
| 10566580 | Gm4759                              | N/A | N/A |

|          |                                    |     |     |
|----------|------------------------------------|-----|-----|
| 10566583 | Gm8995                             | N/A | N/A |
| 10566585 | Gm1966                             | N/A | N/A |
| 10566587 | Olfr693                            | N/A | N/A |
| 10566589 | Olfr694 /// Olfr704                | N/A | N/A |
| 10566593 | ---                                | N/A | N/A |
| 10566595 | Olfr697                            | N/A | N/A |
| 10566599 | Olfr699                            | N/A | N/A |
| 10566601 | Olfr700                            | N/A | N/A |
| 10566607 | Olfr705                            | N/A | N/A |
| 10566609 | Olfr706                            | N/A | N/A |
| 10566611 | Olfr707                            | N/A | N/A |
| 10566615 | Olfr710                            | N/A | N/A |
| 10566618 | Olfr6                              | N/A | N/A |
| 10566620 | Olfr711                            | N/A | N/A |
| 10566622 | Olfr2                              | N/A | N/A |
| 10566626 | Olfr715                            | N/A | N/A |
| 10566630 | 5330417H12Rik                      | N/A | N/A |
| 10566662 | Olfr469                            | N/A | N/A |
| 10566664 | Olfr470                            | N/A | N/A |
| 10566666 | Olfr471                            | N/A | N/A |
| 10566668 | Socs6                              | N/A | N/A |
| 10566676 | Olfr484                            | N/A | N/A |
| 10566678 | Olfr485                            | N/A | N/A |
| 10566682 | Olfr486 /// Olfr487                | N/A | N/A |
| 10566684 | Olfr488                            | N/A | N/A |
| 10566688 | Olfr492                            | N/A | N/A |
| 10566690 | Olfr493                            | N/A | N/A |
| 10566692 | Olfr502                            | N/A | N/A |
| 10566694 | Olfr504                            | N/A | N/A |
| 10566696 | Olfr509                            | N/A | N/A |
| 10566698 | Olfr514                            | N/A | N/A |
| 10566705 | Olfr518                            | N/A | N/A |
| 10566707 | Olfr518 /// Olfr516 /// Olfr519    | N/A | N/A |
| 10566714 | Ric3                               | N/A | N/A |
| 10566743 | Trim66                             | N/A | N/A |
| 10566804 | Tmem9b                             | N/A | N/A |
| 10566846 | Denn5a                             | N/A | N/A |
| 10566870 | Tmem41b                            | N/A | N/A |
| 10566875 | AA474408                           | N/A | N/A |
| 10566877 | Sbf2                               | N/A | N/A |
| 10566922 | B430319F04Rik                      | N/A | N/A |
| 10566926 | Rnf141                             | N/A | N/A |
| 10566934 | Lyve1                              | N/A | N/A |
| 10566966 | Eif4g2                             | N/A | N/A |
| 10567010 | Dkk3                               | N/A | N/A |
| 10567020 | Rpl7a /// Rpl7a-ps3 /// Rpl7a-ps10 | N/A | N/A |
| 10567041 | Gm5600                             | N/A | N/A |
| 10567043 | Rras2                              | N/A | N/A |
| 10567049 | Copb1                              | N/A | N/A |
| 10567072 | Psma1                              | N/A | N/A |
| 10567084 | ---                                | N/A | N/A |
| 10567086 | Cyp2r1                             | N/A | N/A |
| 10567095 | Calca                              | N/A | N/A |
| 10567106 | Rps4y2 /// Gm6816                  | N/A | N/A |
| 10567108 | Sox6                               | N/A | N/A |
| 10567131 | Nup35                              | N/A | N/A |
| 10567134 | Plekha7                            | N/A | N/A |
| 10567163 | Rps13                              | N/A | N/A |
| 10567171 | Rps13 /// Snord14a                 | N/A | N/A |
| 10567173 | Pik3c2a                            | N/A | N/A |
| 10567213 | ---                                | N/A | N/A |
| 10567216 | Rps15a                             | N/A | N/A |
| 10567219 | Arl6ip1                            | N/A | N/A |
| 10567229 | Smg1                               | N/A | N/A |
| 10567289 | Syt17                              | N/A | N/A |
| 10567297 | Itpripl2                           | N/A | N/A |
| 10567299 | Itpripl2                           | N/A | N/A |
| 10567316 | Tmc7                               | N/A | N/A |
| 10567355 | Gprc5b                             | N/A | N/A |
| 10567361 | Gpr139                             | N/A | N/A |
| 10567394 | Pdilt                              | N/A | N/A |
| 10567407 | Thumpd1                            | N/A | N/A |
| 10567412 | Eri2 /// Acsn3                     | N/A | N/A |
| 10567423 | Dcun1d3                            | N/A | N/A |
| 10567428 | ---                                | N/A | N/A |
| 10567430 | ---                                | N/A | N/A |
| 10567432 | Dnahc3                             | N/A | N/A |
| 10567442 | ---                                | N/A | N/A |
| 10567444 | Dnahc3                             | N/A | N/A |
| 10567446 | Dnahc3                             | N/A | N/A |
| 10567448 | Dnahc3                             | N/A | N/A |
| 10567450 | Dnahc3                             | N/A | N/A |
| 10567452 | ---                                | N/A | N/A |
| 10567454 | ---                                | N/A | N/A |

|          |                         |     |     |
|----------|-------------------------|-----|-----|
| 10567456 | ---                     | N/A | N/A |
| 10567458 | ---                     | N/A | N/A |
| 10567460 | ---                     | N/A | N/A |
| 10567462 | ---                     | N/A | N/A |
| 10567464 | ---                     | N/A | N/A |
| 10567466 | ---                     | N/A | N/A |
| 10567490 | ---                     | N/A | N/A |
| 10567492 | ---                     | N/A | N/A |
| 10567494 | ---                     | N/A | N/A |
| 10567496 | ---                     | N/A | N/A |
| 10567498 | ---                     | N/A | N/A |
| 10567500 | ---                     | N/A | N/A |
| 10567502 | ---                     | N/A | N/A |
| 10567504 | ---                     | N/A | N/A |
| 10567506 | ---                     | N/A | N/A |
| 10567508 | ---                     | N/A | N/A |
| 10567510 | ---                     | N/A | N/A |
| 10567512 | ---                     | N/A | N/A |
| 10567514 | ---                     | N/A | N/A |
| 10567516 | ---                     | N/A | N/A |
| 10567518 | ---                     | N/A | N/A |
| 10567520 | ---                     | N/A | N/A |
| 10567522 | ---                     | N/A | N/A |
| 10567564 | Cdr2                    | N/A | N/A |
| 10567574 | Ppia                    | N/A | N/A |
| 10567576 | Mettl9 /// Gm9905       | N/A | N/A |
| 10567578 | ---                     | N/A | N/A |
| 10567587 | ---                     | N/A | N/A |
| 10567589 | Usp31                   | N/A | N/A |
| 10567591 | Usp31                   | N/A | N/A |
| 10567626 | Gga2                    | N/A | N/A |
| 10567657 | Ndufab1                 | N/A | N/A |
| 10567702 | Arhgap17                | N/A | N/A |
| 10567725 | Zkscan2                 | N/A | N/A |
| 10567735 | ---                     | N/A | N/A |
| 10567737 | ---                     | N/A | N/A |
| 10567750 | Gtf3c1                  | N/A | N/A |
| 10567788 | Gsg11                   | N/A | N/A |
| 10567797 | Xpo6                    | N/A | N/A |
| 10567823 | Rpl21                   | N/A | N/A |
| 10567903 | Sh2b1                   | N/A | N/A |
| 10567919 | Atxn2l                  | N/A | N/A |
| 10567995 | Nupr1                   | N/A | N/A |
| 10567999 | Ccdc101                 | N/A | N/A |
| 10568001 | Sult1a1                 | N/A | N/A |
| 10568011 | Giyd2                   | N/A | N/A |
| 10568038 | Gm9967                  | N/A | N/A |
| 10568050 | Aldoa                   | N/A | N/A |
| 10568078 | Taok2                   | N/A | N/A |
| 10568099 | Tmem219                 | N/A | N/A |
| 10568107 | ---                     | N/A | N/A |
| 10568115 | Mvp /// 2900092E17Rik   | N/A | N/A |
| 10568131 | 2900092E17Rik           | N/A | N/A |
| 10568135 | 2900092E17Rik /// Prrt2 | N/A | N/A |
| 10568139 | Maz                     | N/A | N/A |
| 10568169 | Qprt                    | N/A | N/A |
| 10568174 | Spn                     | N/A | N/A |
| 10568188 | Tbc1d10b                | N/A | N/A |
| 10568215 | Gm4532 /// Zfp553       | N/A | N/A |
| 10568217 | Dctpp1                  | N/A | N/A |
| 10568221 | Sephs2                  | N/A | N/A |
| 10568239 | E430018J23Rik           | N/A | N/A |
| 10568243 | Zfp764                  | N/A | N/A |
| 10568252 | Zfp689                  | N/A | N/A |
| 10568258 | Srcap /// 1700008J07Rik | N/A | N/A |
| 10568260 | Zfp629                  | N/A | N/A |
| 10568278 | 1700120K04Rik           | N/A | N/A |
| 10568294 | ---                     | N/A | N/A |
| 10568296 | Hsd3b7                  | N/A | N/A |
| 10568298 | Stx1b                   | N/A | N/A |
| 10568318 | Prss53 /// Vkorc1       | N/A | N/A |
| 10568328 | Vkorc1                  | N/A | N/A |
| 10568332 | Prss8                   | N/A | N/A |
| 10568355 | Pycard                  | N/A | N/A |
| 10568361 | Yipf5                   | N/A | N/A |
| 10568363 | Armcx3                  | N/A | N/A |
| 10568367 | ---                     | N/A | N/A |
| 10568369 | Cox6a2                  | N/A | N/A |
| 10568374 | 9130023H24Rik /// Armc5 | N/A | N/A |
| 10568376 | Slc5a2                  | N/A | N/A |
| 10568390 | ---                     | N/A | N/A |
| 10568392 | Rgs10                   | N/A | N/A |
| 10568399 | Tial1                   | N/A | N/A |
| 10568417 | 1110007A13Rik           | N/A | N/A |



|          |                                    |     |     |
|----------|------------------------------------|-----|-----|
| 10568432 | ---                                | N/A | N/A |
| 10568434 | ---                                | N/A | N/A |
| 10568436 | Fgfr2                              | N/A | N/A |
| 10568461 | Rfwd3                              | N/A | N/A |
| 10568464 | Ate1                               | N/A | N/A |
| 10568480 | Nsmce4a                            | N/A | N/A |
| 10568521 | 2310057M21Rik                      | N/A | N/A |
| 10568529 | lkzf5                              | N/A | N/A |
| 10568532 | Rpl7a                              | N/A | N/A |
| 10568534 | LOC280487                          | N/A | N/A |
| 10568553 | Chst15                             | N/A | N/A |
| 10568568 | Oat                                | N/A | N/A |
| 10568586 | Fam53b                             | N/A | N/A |
| 10568605 | Ctbp2                              | N/A | N/A |
| 10568622 | ---                                | N/A | N/A |
| 10568638 | Uros                               | N/A | N/A |
| 10568651 | Dhx32                              | N/A | N/A |
| 10568705 | Fam196a                            | N/A | N/A |
| 10568731 | ---                                | N/A | N/A |
| 10568733 | Gm10579                            | N/A | N/A |
| 10568758 | 9430038I01Rik                      | N/A | N/A |
| 10568765 | Tcerg1l                            | N/A | N/A |
| 10568780 | Mapk1ip1                           | N/A | N/A |
| 10568792 | Stk32c                             | N/A | N/A |
| 10568805 | Inpp5a /// Nkx6-2                  | N/A | N/A |
| 10568810 | E030019B06Rik                      | N/A | N/A |
| 10568859 | Ndufab1                            | N/A | N/A |
| 10568861 | ---                                | N/A | N/A |
| 10568897 | Tubgcp2                            | N/A | N/A |
| 10568921 | Caly                               | N/A | N/A |
| 10568930 | 1810014F10Rik                      | N/A | N/A |
| 10568939 | Echs1                              | N/A | N/A |
| 10568948 | Sprn /// Mtg1                      | N/A | N/A |
| 10568954 | Olfr524                            | N/A | N/A |
| 10568958 | Olfr530                            | N/A | N/A |
| 10568962 | Olfr532                            | N/A | N/A |
| 10568982 | BC066028                           | N/A | N/A |
| 10568988 | Bet1l                              | N/A | N/A |
| 10569008 | Cox8b                              | N/A | N/A |
| 10569011 | Ifitm5                             | N/A | N/A |
| 10569014 | Ifitm2                             | N/A | N/A |
| 10569017 | Ifitm3                             | N/A | N/A |
| 10569057 | Rnh1                               | N/A | N/A |
| 10569069 | Rps9                               | N/A | N/A |
| 10569100 | Mir210                             | N/A | N/A |
| 10569102 | Irf7                               | N/A | N/A |
| 10569113 | Cdhr5                              | N/A | N/A |
| 10569129 | Sct                                | N/A | N/A |
| 10569134 | Deaf1                              | N/A | N/A |
| 10569149 | Eps8l2 /// B230206H07Rik           | N/A | N/A |
| 10569152 | Pddc1                              | N/A | N/A |
| 10569163 | Cend1                              | N/A | N/A |
| 10569168 | Slc25a22                           | N/A | N/A |
| 10569198 | Cd151                              | N/A | N/A |
| 10569200 | Polr2l /// Usp50                   | N/A | N/A |
| 10569265 | Tollip                             | N/A | N/A |
| 10569273 | 2700078K21Rik                      | N/A | N/A |
| 10569278 | Dusp8 /// 5530400B01Rik            | N/A | N/A |
| 10569280 | Dusp8                              | N/A | N/A |
| 10569288 | Krtap5-4 /// Krtap5-2              | N/A | N/A |
| 10569291 | Krtap5-2                           | N/A | N/A |
| 10569296 | Krtap5-3 /// Krtap5-2 /// Krtap5-1 | N/A | N/A |
| 10569300 | Krtap5-5                           | N/A | N/A |
| 10569303 | ---                                | N/A | N/A |
| 10569306 | Krtap5-4 /// Krtap5-1 /// Gm4559   | N/A | N/A |
| 10569308 | Krtap5-1                           | N/A | N/A |
| 10569311 | ---                                | N/A | N/A |
| 10569313 | 6330512M04Rik                      | N/A | N/A |
| 10569319 | Ctsd                               | N/A | N/A |
| 10569341 | Mir675 /// H19                     | N/A | N/A |
| 10569356 | Mir483                             | N/A | N/A |
| 10569368 | ---                                | N/A | N/A |
| 10569370 | Th                                 | N/A | N/A |
| 10569389 | ---                                | N/A | N/A |
| 10569393 | R74862                             | N/A | N/A |
| 10569429 | Cdkn1c                             | N/A | N/A |
| 10569437 | Phlda2                             | N/A | N/A |
| 10569441 | Nap1l4                             | N/A | N/A |
| 10569456 | ---                                | N/A | N/A |
| 10569494 | Tnfrsf22                           | N/A | N/A |
| 10569539 | Mrgprg                             | N/A | N/A |
| 10569569 | Cttn                               | N/A | N/A |
| 10569583 | Ppfi1                              | N/A | N/A |
| 10569611 | Fadd                               | N/A | N/A |

|          |                                                                           |     |     |
|----------|---------------------------------------------------------------------------|-----|-----|
| 10569654 | 1810010D01Rik                                                             | N/A | N/A |
| 10569702 | Cacng8                                                                    | N/A | N/A |
| 10569714 | Cacng7                                                                    | N/A | N/A |
| 10569717 | ---                                                                       | N/A | N/A |
| 10569733 | Arhgef18                                                                  | N/A | N/A |
| 10569767 | Zfp358                                                                    | N/A | N/A |
| 10569771 | Mcoln1                                                                    | N/A | N/A |
| 10569786 | Pnpla6                                                                    | N/A | N/A |
| 10569848 | Stxbp2                                                                    | N/A | N/A |
| 10569870 | Retn                                                                      | N/A | N/A |
| 10569886 | Trappc5                                                                   | N/A | N/A |
| 10569890 | Aida                                                                      | N/A | N/A |
| 10569896 | Cd209g                                                                    | N/A | N/A |
| 10569898 | Evi5l                                                                     | N/A | N/A |
| 10569927 | Map2k7 /// Gm14378                                                        | N/A | N/A |
| 10569953 | Snappc2                                                                   | N/A | N/A |
| 10569958 | Ccl25                                                                     | N/A | N/A |
| 10569962 | Ccl25                                                                     | N/A | N/A |
| 10569972 | Lass4                                                                     | N/A | N/A |
| 10569985 | BC003267                                                                  | N/A | N/A |
| 10569992 | LOC674846                                                                 | N/A | N/A |
| 10569996 | Rpl21 /// Rpl21-ps14                                                      | N/A | N/A |
| 10570000 | Gpi1                                                                      | N/A | N/A |
| 10570002 | 2410089E03Rik                                                             | N/A | N/A |
| 10570005 | 4921522P10Rik                                                             | N/A | N/A |
| 10570008 | B930078G14Rik                                                             | N/A | N/A |
| 10570119 | Carkd                                                                     | N/A | N/A |
| 10570139 | ---                                                                       | N/A | N/A |
| 10570141 | ---                                                                       | N/A | N/A |
| 10570144 | Arhgef7                                                                   | N/A | N/A |
| 10570178 | A230072I06Rik                                                             | N/A | N/A |
| 10570180 | Gm5607                                                                    | N/A | N/A |
| 10570189 | Sox1                                                                      | N/A | N/A |
| 10570199 | ---                                                                       | N/A | N/A |
| 10570201 | Atp11a                                                                    | N/A | N/A |
| 10570278 | ---                                                                       | N/A | N/A |
| 10570280 | F7                                                                        | N/A | N/A |
| 10570291 | F10                                                                       | N/A | N/A |
| 10570308 | Proz                                                                      | N/A | N/A |
| 10570321 | Cul4a                                                                     | N/A | N/A |
| 10570344 | Lamp1                                                                     | N/A | N/A |
| 10570356 | Tmco3                                                                     | N/A | N/A |
| 10570397 | Cdc16                                                                     | N/A | N/A |
| 10570429 | Zfp828                                                                    | N/A | N/A |
| 10570432 | Snora3                                                                    | N/A | N/A |
| 10570434 | Ifitm1                                                                    | N/A | N/A |
| 10570437 | Fbxo25                                                                    | N/A | N/A |
| 10570448 | Gm10699                                                                   | N/A | N/A |
| 10570450 | Dlgap2                                                                    | N/A | N/A |
| 10570470 | Hmgb1                                                                     | N/A | N/A |
| 10570513 | Kbtbd11                                                                   | N/A | N/A |
| 10570516 | Kbtbd11                                                                   | N/A | N/A |
| 10570556 | Mcph1                                                                     | N/A | N/A |
| 10570573 | Agpat5                                                                    | N/A | N/A |
| 10570585 | Xkr5                                                                      | N/A | N/A |
| 10570587 | Defb34                                                                    | N/A | N/A |
| 10570604 | ---                                                                       | N/A | N/A |
| 10570618 | Defb46                                                                    | N/A | N/A |
| 10570621 | Defb3                                                                     | N/A | N/A |
| 10570630 | ---                                                                       | N/A | N/A |
| 10570634 | Gm15319 /// 4930467E23Rik /// Trim44 /// Gm7827                           | N/A | N/A |
| 10570639 | 2610005L07Rik                                                             | N/A | N/A |
| 10570641 | AY761185                                                                  | N/A | N/A |
| 10570647 | ---                                                                       | N/A | N/A |
| 10570651 | Defa21 /// Defa22                                                         | N/A | N/A |
| 10570656 | Defa23                                                                    | N/A | N/A |
| 10570660 | Defa4 /// Gm14850 /// Gm15315 /// Defa5 /// Gm10104 /// Gm15293           | N/A | N/A |
| 10570663 | Defa23 /// Defa25 /// Gm6696 /// Defa-ps1 /// Gm15299                     | N/A | N/A |
| 10570668 | Defa6 /// Defa23 /// Defa24 /// Defa-rs7 /// Defa17 /// Gm15284 /// Defa3 | N/A | N/A |
| 10570671 | Defa21 /// Defa22                                                         | N/A | N/A |
| 10570676 | Defa24                                                                    | N/A | N/A |
| 10570680 | ---                                                                       | N/A | N/A |
| 10570687 | ---                                                                       | N/A | N/A |
| 10570690 | Defa13                                                                    | N/A | N/A |
| 10570693 | Gm14850 /// Gm15315 /// Defa5 /// Gm10104 /// Gm15293                     | N/A | N/A |
| 10570700 | Defa23 /// Defa25 /// Gm6696 /// Defa-ps1 /// Gm15299                     | N/A | N/A |
| 10570706 | Defa20 /// Defa3 /// Gm15308                                              | N/A | N/A |
| 10570711 | Defa20 /// Defa3 /// Gm15308                                              | N/A | N/A |
| 10570717 | Defa4 /// Gm14850 /// Gm15315 /// Defa5 /// Gm10104 /// Gm15293           | N/A | N/A |
| 10570726 | Defa26 /// Defa-rs7 /// Defa23                                            | N/A | N/A |
| 10570729 | Defa13                                                                    | N/A | N/A |
| 10570732 | Defa4 /// Gm14850 /// Gm15315 /// Defa5 /// Gm10104 /// Gm15293           | N/A | N/A |
| 10570738 | ---                                                                       | N/A | N/A |
| 10570758 | Defb13                                                                    | N/A | N/A |

|          |                          |     |     |
|----------|--------------------------|-----|-----|
| 10570764 | Alg11                    | N/A | N/A |
| 10570771 | Vps36                    | N/A | N/A |
| 10570786 | Thsd1                    | N/A | N/A |
| 10570855 | Plat                     | N/A | N/A |
| 10570875 | Myst3                    | N/A | N/A |
| 10570951 | Nkx6-3                   | N/A | N/A |
| 10570955 | Golga7 /// 4930518F22Rik | N/A | N/A |
| 10570957 | Sfrp1                    | N/A | N/A |
| 10570975 | Tm2d2                    | N/A | N/A |
| 10570980 | Rps23 /// Gm8618         | N/A | N/A |
| 10570982 | Fgfr1                    | N/A | N/A |
| 10571005 | Letm2 /// D830025C05Rik  | N/A | N/A |
| 10571007 | Whsc111                  | N/A | N/A |
| 10571036 | Ppapdc1b                 | N/A | N/A |
| 10571045 | Bag4 /// Ddhd2           | N/A | N/A |
| 10571048 | Lsm1                     | N/A | N/A |
| 10571093 | Rnf170                   | N/A | N/A |
| 10571111 | Zfp703                   | N/A | N/A |
| 10571114 | Erlin2                   | N/A | N/A |
| 10571128 | Prosc                    | N/A | N/A |
| 10571162 | Eif4ebp1                 | N/A | N/A |
| 10571205 | ---                      | N/A | N/A |
| 10571207 | Dusp26                   | N/A | N/A |
| 10571214 | Rnf122                   | N/A | N/A |
| 10571221 | Mak16 /// BC019943       | N/A | N/A |
| 10571241 | Purg                     | N/A | N/A |
| 10571246 | 5930422O12Rik            | N/A | N/A |
| 10571248 | ---                      | N/A | N/A |
| 10571250 | Hmgb1-rs17               | N/A | N/A |
| 10571266 | Ppp2cb /// Ubxn8         | N/A | N/A |
| 10571274 | Gsr                      | N/A | N/A |
| 10571288 | Gtf2e2                   | N/A | N/A |
| 10571297 | ---                      | N/A | N/A |
| 10571300 | Mboat4                   | N/A | N/A |
| 10571302 | Tmem66                   | N/A | N/A |
| 10571310 | Rpl29                    | N/A | N/A |
| 10571319 | Tnks                     | N/A | N/A |
| 10571321 | Ppp1r3b                  | N/A | N/A |
| 10571325 | Mfhas1                   | N/A | N/A |
| 10571342 | Rps12 /// Gm10063        | N/A | N/A |
| 10571344 | D8Ert82e                 | N/A | N/A |
| 10571362 | Al429214                 | N/A | N/A |
| 10571364 | ---                      | N/A | N/A |
| 10571371 | Tusc3                    | N/A | N/A |
| 10571382 | ---                      | N/A | N/A |
| 10571399 | Zdhhc2                   | N/A | N/A |
| 10571439 | 4930529F22Rik            | N/A | N/A |
| 10571444 | Slc7a2                   | N/A | N/A |
| 10571474 | Pcm1                     | N/A | N/A |
| 10571514 | ---                      | N/A | N/A |
| 10571528 | ---                      | N/A | N/A |
| 10571530 | Fat1                     | N/A | N/A |
| 10571567 | Sorbs2                   | N/A | N/A |
| 10571599 | ---                      | N/A | N/A |
| 10571621 | Ufsp2                    | N/A | N/A |
| 10571634 | Lrp2bp /// Ankrd37       | N/A | N/A |
| 10571647 | 4933411K20Rik            | N/A | N/A |
| 10571653 | Actg1                    | N/A | N/A |
| 10571657 | Acs1                     | N/A | N/A |
| 10571705 | Irf2                     | N/A | N/A |
| 10571724 | Gm10083                  | N/A | N/A |
| 10571728 | Rwdd4a                   | N/A | N/A |
| 10571737 | AA386476                 | N/A | N/A |
| 10571739 | Cdkn2aip                 | N/A | N/A |
| 10571741 | ---                      | N/A | N/A |
| 10571745 | Cldn22 /// Wwc2          | N/A | N/A |
| 10571747 | ---                      | N/A | N/A |
| 10571761 | ---                      | N/A | N/A |
| 10571763 | ---                      | N/A | N/A |
| 10571768 | ---                      | N/A | N/A |
| 10571774 | Aga                      | N/A | N/A |
| 10571788 | Vegfc                    | N/A | N/A |
| 10571815 | Gpm6a                    | N/A | N/A |
| 10571824 | Gm10674 /// Gm7360       | N/A | N/A |
| 10571829 | Gira3                    | N/A | N/A |
| 10571840 | Hpgd                     | N/A | N/A |
| 10571849 | Fbxo8                    | N/A | N/A |
| 10571857 | ---                      | N/A | N/A |
| 10571860 | Hand2                    | N/A | N/A |
| 10571865 | Scrg1                    | N/A | N/A |
| 10571876 | Gapdh                    | N/A | N/A |
| 10571878 | BC030500                 | N/A | N/A |
| 10571889 | ---                      | N/A | N/A |
| 10571911 | 270029M09Rik             | N/A | N/A |

|          |                                                 |     |     |
|----------|-------------------------------------------------|-----|-----|
| 10571920 | B230317F23Rik                                   | N/A | N/A |
| 10571922 | Nek1                                            | N/A | N/A |
| 10571975 | ---                                             | N/A | N/A |
| 10571978 | Cbr4                                            | N/A | N/A |
| 10572024 | Spock3                                          | N/A | N/A |
| 10572038 | Tmem192                                         | N/A | N/A |
| 10572046 | ---                                             | N/A | N/A |
| 10572048 | ---                                             | N/A | N/A |
| 10572050 | March1                                          | N/A | N/A |
| 10572064 | ---                                             | N/A | N/A |
| 10572070 | Npy1r                                           | N/A | N/A |
| 10572077 | Naf1                                            | N/A | N/A |
| 10572083 | ---                                             | N/A | N/A |
| 10572109 | Ints10                                          | N/A | N/A |
| 10572146 | Atp6v1b2                                        | N/A | N/A |
| 10572161 | D10627                                          | N/A | N/A |
| 10572170 | D130040H23Rik                                   | N/A | N/A |
| 10572212 | Gmip                                            | N/A | N/A |
| 10572241 | Pbx4                                            | N/A | N/A |
| 10572251 | Tssk6 /// Ndufa13                               | N/A | N/A |
| 10572253 | Sugp1                                           | N/A | N/A |
| 10572271 | Tm6sf2                                          | N/A | N/A |
| 10572282 | Hapln4                                          | N/A | N/A |
| 10572332 | Sugp2                                           | N/A | N/A |
| 10572357 | Cope                                            | N/A | N/A |
| 10572368 | Gdf1 /// Lass1                                  | N/A | N/A |
| 10572408 | Fkbp8                                           | N/A | N/A |
| 10572419 | Eil                                             | N/A | N/A |
| 10572449 | Lsm4                                            | N/A | N/A |
| 10572456 | Jund /// Gm11175                                | N/A | N/A |
| 10572485 | Rab3a                                           | N/A | N/A |
| 10572514 | A230052G05Rik                                   | N/A | N/A |
| 10572516 | Mtap1s                                          | N/A | N/A |
| 10572525 | Gm10654                                         | N/A | N/A |
| 10572527 | Gm15319 /// 4930467E23Rik /// Trim44 /// Gm7827 | N/A | N/A |
| 10572533 | Myo9b                                           | N/A | N/A |
| 10572580 | Use1                                            | N/A | N/A |
| 10572591 | Ocel1                                           | N/A | N/A |
| 10572596 | 5430437P03Rik                                   | N/A | N/A |
| 10572613 | Mrpl34                                          | N/A | N/A |
| 10572616 | Dda1                                            | N/A | N/A |
| 10572622 | Gtpbp3                                          | N/A | N/A |
| 10572635 | Sfn                                             | N/A | N/A |
| 10572637 | Fam125a                                         | N/A | N/A |
| 10572647 | Slc27a1                                         | N/A | N/A |
| 10572663 | Pgls                                            | N/A | N/A |
| 10572722 | ---                                             | N/A | N/A |
| 10572724 | Zfp709                                          | N/A | N/A |
| 10572727 | Zfp882                                          | N/A | N/A |
| 10572730 | Zfp617                                          | N/A | N/A |
| 10572733 | BC049349                                        | N/A | N/A |
| 10572739 | 6430601O08Rik                                   | N/A | N/A |
| 10572741 | Olfr372                                         | N/A | N/A |
| 10572743 | Olfr373                                         | N/A | N/A |
| 10572745 | Olfr374                                         | N/A | N/A |
| 10572755 | ---                                             | N/A | N/A |
| 10572757 | Rab8a                                           | N/A | N/A |
| 10572779 | Fam32a                                          | N/A | N/A |
| 10572786 | Ap1m1                                           | N/A | N/A |
| 10572804 | 1700030K09Rik                                   | N/A | N/A |
| 10572813 | Usmg5                                           | N/A | N/A |
| 10572815 | Tmem38a /// Nwd1                                | N/A | N/A |
| 10572838 | Sin3b                                           | N/A | N/A |
| 10572870 | Hmgxb4                                          | N/A | N/A |
| 10572880 | Tom1                                            | N/A | N/A |
| 10572928 | Rasd2                                           | N/A | N/A |
| 10572932 | Naa20                                           | N/A | N/A |
| 10572949 | Nr3c2                                           | N/A | N/A |
| 10572958 | ---                                             | N/A | N/A |
| 10572960 | 0610038B21Rik /// Arhgap10                      | N/A | N/A |
| 10572962 | Prmt10                                          | N/A | N/A |
| 10573008 | Zfp827                                          | N/A | N/A |
| 10573027 | Otud4                                           | N/A | N/A |
| 10573048 | Anapc10                                         | N/A | N/A |
| 10573075 | ---                                             | N/A | N/A |
| 10573077 | Usp38                                           | N/A | N/A |
| 10573082 | Inpp4b                                          | N/A | N/A |
| 10573110 | ---                                             | N/A | N/A |
| 10573115 | Rnf150                                          | N/A | N/A |
| 10573128 | Tbc1d9                                          | N/A | N/A |
| 10573194 | Ndufb7                                          | N/A | N/A |
| 10573198 | Dnajb1                                          | N/A | N/A |
| 10573203 | Gipc1                                           | N/A | N/A |
| 10573232 | ---                                             | N/A | N/A |

|          |                               |     |     |
|----------|-------------------------------|-----|-----|
| 10573234 | Lphn1                         | N/A | N/A |
| 10573261 | Asf1b                         | N/A | N/A |
| 10573295 | Rfx1                          | N/A | N/A |
| 10573317 | Mir709                        | N/A | N/A |
| 10573342 | Mir23a                        | N/A | N/A |
| 10573344 | Mir27a                        | N/A | N/A |
| 10573346 | Mir24-2                       | N/A | N/A |
| 10573348 | Cacna1a                       | N/A | N/A |
| 10573401 | Trmt1                         | N/A | N/A |
| 10573427 | Nfix /// G430095P16Rik        | N/A | N/A |
| 10573430 | Gadd45gip1 /// Rad23a         | N/A | N/A |
| 10573434 | Farsa                         | N/A | N/A |
| 10573451 | Syce2                         | N/A | N/A |
| 10573457 | Klf1                          | N/A | N/A |
| 10573483 | Prdx2                         | N/A | N/A |
| 10573515 | 2310036O22Rik                 | N/A | N/A |
| 10573519 | Tnpo2                         | N/A | N/A |
| 10573549 | Fbxw9                         | N/A | N/A |
| 10573566 | Dhps                          | N/A | N/A |
| 10573578 | BC056474                      | N/A | N/A |
| 10573583 | Man2b1                        | N/A | N/A |
| 10573613 | Olfir371                      | N/A | N/A |
| 10573626 | Gpt2                          | N/A | N/A |
| 10573637 | Phkb                          | N/A | N/A |
| 10573673 | ---                           | N/A | N/A |
| 10573675 | Lonp2                         | N/A | N/A |
| 10573691 | Gm10638 /// Siah1a            | N/A | N/A |
| 10573693 | Rps13                         | N/A | N/A |
| 10573703 | Tmem188                       | N/A | N/A |
| 10573713 | Heatr3                        | N/A | N/A |
| 10573731 | 9430002A10Rik                 | N/A | N/A |
| 10573733 | Papd5                         | N/A | N/A |
| 10573803 | Cyld                          | N/A | N/A |
| 10573821 | Rps6 /// Rps6-ps2 /// Gm16409 | N/A | N/A |
| 10573823 | Chd9                          | N/A | N/A |
| 10573865 | Gm3579                        | N/A | N/A |
| 10573867 | Rbl2                          | N/A | N/A |
| 10573893 | Fto                           | N/A | N/A |
| 10573908 | ---                           | N/A | N/A |
| 10573954 | Capns2                        | N/A | N/A |
| 10573975 | Ces5a                         | N/A | N/A |
| 10573979 | Gnao1                         | N/A | N/A |
| 10573996 | Amfr                          | N/A | N/A |
| 10573998 | Ogfod1                        | N/A | N/A |
| 10574018 | Mt3                           | N/A | N/A |
| 10574023 | Mt2                           | N/A | N/A |
| 10574027 | Mt1                           | N/A | N/A |
| 10574033 | Nup93                         | N/A | N/A |
| 10574057 | Mir138-2                      | N/A | N/A |
| 10574087 | Herpud1                       | N/A | N/A |
| 10574096 | Ap3s1                         | N/A | N/A |
| 10574098 | Nlrc5                         | N/A | N/A |
| 10574100 | Nlrc5                         | N/A | N/A |
| 10574102 | Nlrc5                         | N/A | N/A |
| 10574133 | Nlrc5                         | N/A | N/A |
| 10574135 | Nlrc5                         | N/A | N/A |
| 10574139 | Nlrc5                         | N/A | N/A |
| 10574141 | Nlrc5                         | N/A | N/A |
| 10574143 | Nlrc5                         | N/A | N/A |
| 10574145 | Nlrc5                         | N/A | N/A |
| 10574147 | ---                           | N/A | N/A |
| 10574149 | Nlrc5                         | N/A | N/A |
| 10574151 | Nlrc5                         | N/A | N/A |
| 10574153 | Nlrc5                         | N/A | N/A |
| 10574155 | Nlrc5                         | N/A | N/A |
| 10574157 | Nlrc5                         | N/A | N/A |
| 10574159 | Nlrc5                         | N/A | N/A |
| 10574161 | Nlrc5                         | N/A | N/A |
| 10574163 | Nlrc5                         | N/A | N/A |
| 10574166 | Cpne2                         | N/A | N/A |
| 10574184 | Rspry1                        | N/A | N/A |
| 10574204 | Arl2bp                        | N/A | N/A |
| 10574220 | Cx3cl1                        | N/A | N/A |
| 10574226 | Ccl17                         | N/A | N/A |
| 10574230 | ---                           | N/A | N/A |
| 10574232 | Coq9                          | N/A | N/A |
| 10574242 | Polr2c /// Dok4               | N/A | N/A |
| 10574259 | Gpr56                         | N/A | N/A |
| 10574308 | Katnb1                        | N/A | N/A |
| 10574342 | AA960436                      | N/A | N/A |
| 10574350 | Mmp15                         | N/A | N/A |
| 10574375 | ---                           | N/A | N/A |
| 10574384 | Ndrg4                         | N/A | N/A |
| 10574404 | Setd6                         | N/A | N/A |

|          |                          |     |     |
|----------|--------------------------|-----|-----|
| 10574410 | Cnot1 /// 4930513N10Rik  | N/A | N/A |
| 10574412 | Sap18 /// Gm10094        | N/A | N/A |
| 10574421 | Gm10632                  | N/A | N/A |
| 10574427 | Impdh2                   | N/A | N/A |
| 10574432 | LOC280487                | N/A | N/A |
| 10574434 | LOC280487                | N/A | N/A |
| 10574436 | Khdrbs1                  | N/A | N/A |
| 10574438 | Cdh5                     | N/A | N/A |
| 10574451 | Bean1                    | N/A | N/A |
| 10574456 | Cklf                     | N/A | N/A |
| 10574471 | Cnrm3                    | N/A | N/A |
| 10574478 | Dync1li2                 | N/A | N/A |
| 10574498 | Ces2a                    | N/A | N/A |
| 10574545 | Ces2e                    | N/A | N/A |
| 10574572 | Ces2g                    | N/A | N/A |
| 10574595 | ---                      | N/A | N/A |
| 10574598 | Ces3a                    | N/A | N/A |
| 10574607 | Ces3b                    | N/A | N/A |
| 10574617 | Ces4a                    | N/A | N/A |
| 10574632 | Cfbf                     | N/A | N/A |
| 10574641 | D230025D16Rik            | N/A | N/A |
| 10574682 | E2f4                     | N/A | N/A |
| 10574694 | Elmo3                    | N/A | N/A |
| 10574718 | Tmem208 /// Fhod1        | N/A | N/A |
| 10574789 | Fam65a /// Mir1966       | N/A | N/A |
| 10574812 | Ctcf                     | N/A | N/A |
| 10574897 | Thap11                   | N/A | N/A |
| 10574939 | Pskh1                    | N/A | N/A |
| 10574944 | Dus2l /// Ddx28          | N/A | N/A |
| 10574962 | Nfatc3                   | N/A | N/A |
| 10574976 | Pla2g15                  | N/A | N/A |
| 10574985 | Slc7a6                   | N/A | N/A |
| 10574996 | Prmt7                    | N/A | N/A |
| 10575019 | ---                      | N/A | N/A |
| 10575021 | Zfp90                    | N/A | N/A |
| 10575074 | Tmco7                    | N/A | N/A |
| 10575102 | Cirh1a                   | N/A | N/A |
| 10575120 | Sntb2                    | N/A | N/A |
| 10575129 | Vps4a                    | N/A | N/A |
| 10575142 | Cog8 /// Pdf /// Gm10627 | N/A | N/A |
| 10575151 | C630050I24Rik            | N/A | N/A |
| 10575153 | Cyb5b                    | N/A | N/A |
| 10575160 | Nfat5                    | N/A | N/A |
| 10575184 | Wwp2                     | N/A | N/A |
| 10575209 | LOC100505227             | N/A | N/A |
| 10575213 | Zfhx3                    | N/A | N/A |
| 10575249 | Txn14b                   | N/A | N/A |
| 10575291 | Zfp821                   | N/A | N/A |
| 10575302 | Ap1g1                    | N/A | N/A |
| 10575326 | ---                      | N/A | N/A |
| 10575328 | Phlpp2                   | N/A | N/A |
| 10575349 | Tat                      | N/A | N/A |
| 10575363 | Zfp612                   | N/A | N/A |
| 10575376 | Ftsjd1                   | N/A | N/A |
| 10575473 | Gm9558                   | N/A | N/A |
| 10575497 | Mtss1l                   | N/A | N/A |
| 10575512 | Cog4                     | N/A | N/A |
| 10575534 | St3gal2                  | N/A | N/A |
| 10575548 | ---                      | N/A | N/A |
| 10575550 | Exosc6 /// Aars          | N/A | N/A |
| 10575578 | Pdpr                     | N/A | N/A |
| 10575596 | ---                      | N/A | N/A |
| 10575598 | Znrf1                    | N/A | N/A |
| 10575616 | Gabarapl2                | N/A | N/A |
| 10575619 | Terf2ip                  | N/A | N/A |
| 10575628 | ---                      | N/A | N/A |
| 10575630 | Cntnap4                  | N/A | N/A |
| 10575662 | Syce1l /// Mon1b         | N/A | N/A |
| 10575685 | Nudt7                    | N/A | N/A |
| 10575693 | Vat1l                    | N/A | N/A |
| 10575706 | Wwox                     | N/A | N/A |
| 10575745 | Atmin                    | N/A | N/A |
| 10575750 | Bcml1                    | N/A | N/A |
| 10575763 | Gan                      | N/A | N/A |
| 10575775 | 4933407C03Rik            | N/A | N/A |
| 10575777 | 4933407C03Rik            | N/A | N/A |
| 10575833 | Hsd17b2                  | N/A | N/A |
| 10575840 | LOC100504406             | N/A | N/A |
| 10575842 | ---                      | N/A | N/A |
| 10575844 | Cdh13                    | N/A | N/A |
| 10575861 | Hsbp1                    | N/A | N/A |
| 10575867 | Mlycd                    | N/A | N/A |
| 10575873 | Osgin1                   | N/A | N/A |
| 10575880 | Necab2                   | N/A | N/A |

|          |                                 |     |     |
|----------|---------------------------------|-----|-----|
| 10575961 | Usp10                           | N/A | N/A |
| 10575993 | 6430548M08Rik                   | N/A | N/A |
| 10576010 | Gse1 /// Gins2                  | N/A | N/A |
| 10576027 | Gm10614                         | N/A | N/A |
| 10576029 | Cox4i1                          | N/A | N/A |
| 10576046 | Foxf1a                          | N/A | N/A |
| 10576049 | Foxf1a                          | N/A | N/A |
| 10576051 | Foxc2                           | N/A | N/A |
| 10576056 | Map1lc3b                        | N/A | N/A |
| 10576062 | Jph3                            | N/A | N/A |
| 10576073 | Banp                            | N/A | N/A |
| 10576088 | Gm22                            | N/A | N/A |
| 10576090 | Zfpm1                           | N/A | N/A |
| 10576115 | Il17c                           | N/A | N/A |
| 10576152 | Trappc2l                        | N/A | N/A |
| 10576158 | Cbfa2t3                         | N/A | N/A |
| 10576160 | Acsf3                           | N/A | N/A |
| 10576173 | Gm16378                         | N/A | N/A |
| 10576189 | ---                             | N/A | N/A |
| 10576191 | Spg7                            | N/A | N/A |
| 10576216 | Rpl13 /// Snord68               | N/A | N/A |
| 10576218 | Cpne7                           | N/A | N/A |
| 10576246 | Rps12 /// Gm10063 /// Rps12-ps2 | N/A | N/A |
| 10576258 | Cdk10                           | N/A | N/A |
| 10576288 | Spire2                          | N/A | N/A |
| 10576305 | Tcf25                           | N/A | N/A |
| 10576328 | Mc1r                            | N/A | N/A |
| 10576335 | Def8                            | N/A | N/A |
| 10576354 | Afg3l1                          | N/A | N/A |
| 10576373 | Gas8                            | N/A | N/A |
| 10576386 | Rhou                            | N/A | N/A |
| 10576401 | 1700054N08Rik                   | N/A | N/A |
| 10576403 | Urb2                            | N/A | N/A |
| 10576413 | ---                             | N/A | N/A |
| 10576437 | ---                             | N/A | N/A |
| 10576439 | Cog2                            | N/A | N/A |
| 10576482 | Arv1                            | N/A | N/A |
| 10576493 | ---                             | N/A | N/A |
| 10576506 | Gnpat                           | N/A | N/A |
| 10576532 | Tsnax                           | N/A | N/A |
| 10576556 | ---                             | N/A | N/A |
| 10576559 | 4933403G14Rik                   | N/A | N/A |
| 10576581 | Kcnk1                           | N/A | N/A |
| 10576598 | 1810063B05Rik                   | N/A | N/A |
| 10576608 | ---                             | N/A | N/A |
| 10576610 | Pard3                           | N/A | N/A |
| 10576639 | Nrp1                            | N/A | N/A |
| 10576657 | ---                             | N/A | N/A |
| 10576659 | ---                             | N/A | N/A |
| 10576661 | Itgb1                           | N/A | N/A |
| 10576692 | Insr                            | N/A | N/A |
| 10576696 | Insr                            | N/A | N/A |
| 10576719 | Pex11c                          | N/A | N/A |
| 10576726 | Rps23 /// Gm8618                | N/A | N/A |
| 10576728 | Xab2                            | N/A | N/A |
| 10576772 | Clec4g                          | N/A | N/A |
| 10576774 | Clec4g                          | N/A | N/A |
| 10576797 | ---                             | N/A | N/A |
| 10576844 | BC068157                        | N/A | N/A |
| 10576854 | Ctxn1                           | N/A | N/A |
| 10576857 | Timm44                          | N/A | N/A |
| 10576881 | Gm7461                          | N/A | N/A |
| 10576896 | Gm9457                          | N/A | N/A |
| 10576899 | ---                             | N/A | N/A |
| 10576901 | Slc10a2                         | N/A | N/A |
| 10576909 | ---                             | N/A | N/A |
| 10576911 | Efnb2                           | N/A | N/A |
| 10576934 | Fam155a                         | N/A | N/A |
| 10576940 | Fam155a /// LOC100504132        | N/A | N/A |
| 10576942 | ---                             | N/A | N/A |
| 10576944 | Gm10067                         | N/A | N/A |
| 10576946 | Lig4                            | N/A | N/A |
| 10576951 | Tnfsf13b                        | N/A | N/A |
| 10576971 | Irs2                            | N/A | N/A |
| 10577048 | Ankrd10                         | N/A | N/A |
| 10577065 | ---                             | N/A | N/A |
| 10577070 | Tubgcp3                         | N/A | N/A |
| 10577093 | Gm15348                         | N/A | N/A |
| 10577096 | Pcid2                           | N/A | N/A |
| 10577114 | Grtp1                           | N/A | N/A |
| 10577144 | Dcun1d2 /// Tmco3               | N/A | N/A |
| 10577190 | Rasa3                           | N/A | N/A |
| 10577217 | ---                             | N/A | N/A |
| 10577222 | 2410022L05Rik                   | N/A | N/A |

|          |                                                         |     |     |
|----------|---------------------------------------------------------|-----|-----|
| 10577226 | 2610019F03Rik                                           | N/A | N/A |
| 10577230 | Erich1                                                  | N/A | N/A |
| 10577240 | Csmd1                                                   | N/A | N/A |
| 10577349 | Defb39                                                  | N/A | N/A |
| 10577356 | ---                                                     | N/A | N/A |
| 10577359 | Defb8                                                   | N/A | N/A |
| 10577388 | Gm15319 /// 4930467E23Rik /// Trim44 /// Gm7827         | N/A | N/A |
| 10577395 | 2610005L07Rik /// 6820431F20Rik                         | N/A | N/A |
| 10577412 | 2610005L07Rik /// 6820431F20Rik                         | N/A | N/A |
| 10577419 | ---                                                     | N/A | N/A |
| 10577421 | Defa-rs1                                                | N/A | N/A |
| 10577426 | Defa-rs1                                                | N/A | N/A |
| 10577429 | Defa-rs1 /// Gm14851 /// AY761184 /// Gm7861 /// Gm7849 | N/A | N/A |
| 10577432 | ---                                                     | N/A | N/A |
| 10577434 | Defa-rs1 /// Gm14851 /// AY761184 /// Gm7861 /// Gm7849 | N/A | N/A |
| 10577444 | Defb11                                                  | N/A | N/A |
| 10577446 | Defb15                                                  | N/A | N/A |
| 10577449 | Atp7b                                                   | N/A | N/A |
| 10577517 | Slc25a15                                                | N/A | N/A |
| 10577528 | Al316807 /// Slc20a2                                    | N/A | N/A |
| 10577534 | Vdac3                                                   | N/A | N/A |
| 10577544 | Polb                                                    | N/A | N/A |
| 10577560 | lkbkb                                                   | N/A | N/A |
| 10577586 | Ap3m2                                                   | N/A | N/A |
| 10577602 | Mir486                                                  | N/A | N/A |
| 10577604 | Agpat6                                                  | N/A | N/A |
| 10577641 | 1810011O10Rik                                           | N/A | N/A |
| 10577645 | Ido2                                                    | N/A | N/A |
| 10577757 | Adam9                                                   | N/A | N/A |
| 10577808 | Tacc1                                                   | N/A | N/A |
| 10577824 | Letm2                                                   | N/A | N/A |
| 10577838 | Ddhd2                                                   | N/A | N/A |
| 10577858 | Bag4                                                    | N/A | N/A |
| 10577866 | Ash2l                                                   | N/A | N/A |
| 10577882 | Hgsnat                                                  | N/A | N/A |
| 10577903 | 4930444A02Rik                                           | N/A | N/A |
| 10577910 | Fnta                                                    | N/A | N/A |
| 10577922 | Hook3                                                   | N/A | N/A |
| 10577946 | Prosc                                                   | N/A | N/A |
| 10577948 | Brf2 /// Gpr124                                         | N/A | N/A |
| 10577954 | Rab11fip1                                               | N/A | N/A |
| 10577990 | ---                                                     | N/A | N/A |
| 10577992 | ---                                                     | N/A | N/A |
| 10577996 | Unc5d                                                   | N/A | N/A |
| 10577999 | Unc5d                                                   | N/A | N/A |
| 10578017 | Gm9911                                                  | N/A | N/A |
| 10578019 | Nudc                                                    | N/A | N/A |
| 10578025 | ---                                                     | N/A | N/A |
| 10578027 | Mak16 /// BC019943                                      | N/A | N/A |
| 10578037 | Eif3h                                                   | N/A | N/A |
| 10578040 | ---                                                     | N/A | N/A |
| 10578042 | Tgs1                                                    | N/A | N/A |
| 10578045 | Nrg1                                                    | N/A | N/A |
| 10578064 | Rpl27a /// Gm5908 /// Gm5453                            | N/A | N/A |
| 10578069 | Gtpbp10                                                 | N/A | N/A |
| 10578109 | Ubxn8                                                   | N/A | N/A |
| 10578123 | Rbpms                                                   | N/A | N/A |
| 10578138 | Dctn6                                                   | N/A | N/A |
| 10578145 | Erh                                                     | N/A | N/A |
| 10578149 | Leprot1                                                 | N/A | N/A |
| 10578153 | ---                                                     | N/A | N/A |
| 10578155 | ---                                                     | N/A | N/A |
| 10578157 | Tnks                                                    | N/A | N/A |
| 10578191 | ---                                                     | N/A | N/A |
| 10578193 | Eri1                                                    | N/A | N/A |
| 10578207 | Lonrf1                                                  | N/A | N/A |
| 10578219 | ---                                                     | N/A | N/A |
| 10578241 | Dlc1 /// A730069N07Rik                                  | N/A | N/A |
| 10578249 | Gm10683                                                 | N/A | N/A |
| 10578251 | ---                                                     | N/A | N/A |
| 10578262 | Mir383                                                  | N/A | N/A |
| 10578277 | ---                                                     | N/A | N/A |
| 10578279 | Gm10682                                                 | N/A | N/A |
| 10578287 | Cnot7                                                   | N/A | N/A |
| 10578320 | ---                                                     | N/A | N/A |
| 10578322 | Pdgfrl /// Gm9868                                       | N/A | N/A |
| 10578324 | Mtus1                                                   | N/A | N/A |
| 10578352 | Fgl1                                                    | N/A | N/A |
| 10578361 | Asah1                                                   | N/A | N/A |
| 10578377 | Frg1                                                    | N/A | N/A |
| 10578399 | ---                                                     | N/A | N/A |
| 10578405 | ---                                                     | N/A | N/A |
| 10578421 | Adam34                                                  | N/A | N/A |
| 10578423 | Gm9908                                                  | N/A | N/A |



|          |                                      |     |     |
|----------|--------------------------------------|-----|-----|
| 10578425 | AY512931                             | N/A | N/A |
| 10578448 | Cyp4v3 /// Klkb1                     | N/A | N/A |
| 10578477 | Fam149a                              | N/A | N/A |
| 10578504 | 1700029J07Rik                        | N/A | N/A |
| 10578515 | Ankrd37                              | N/A | N/A |
| 10578521 | Snx25                                | N/A | N/A |
| 10578539 | Slc25a4                              | N/A | N/A |
| 10578545 | Gm12070 /// Gm2606 /// Gm2451        | N/A | N/A |
| 10578572 | Stox2                                | N/A | N/A |
| 10578574 | Stox2                                | N/A | N/A |
| 10578582 | D030016E14Rik                        | N/A | N/A |
| 10578613 | Rps16 /// Rps16-ps2                  | N/A | N/A |
| 10578619 | Cdkn2aip                             | N/A | N/A |
| 10578623 | Wwc2                                 | N/A | N/A |
| 10578647 | ---                                  | N/A | N/A |
| 10578649 | Odz3                                 | N/A | N/A |
| 10578679 | Gm10675                              | N/A | N/A |
| 10578681 | ---                                  | N/A | N/A |
| 10578683 | Eif2s2 /// Gm9892                    | N/A | N/A |
| 10578685 | ---                                  | N/A | N/A |
| 10578688 | Rnu2                                 | N/A | N/A |
| 10578703 | Spcs3                                | N/A | N/A |
| 10578709 | Wdr17                                | N/A | N/A |
| 10578757 | Fbxo8 /// BC088983                   | N/A | N/A |
| 10578763 | Sap30                                | N/A | N/A |
| 10578768 | ---                                  | N/A | N/A |
| 10578771 | Galnt7                               | N/A | N/A |
| 10578786 | Galnt16                              | N/A | N/A |
| 10578794 | Galnt16                              | N/A | N/A |
| 10578796 | Galnt16                              | N/A | N/A |
| 10578810 | Clcn3                                | N/A | N/A |
| 10578872 | ---                                  | N/A | N/A |
| 10578902 | Mir710                               | N/A | N/A |
| 10578904 | Cpe                                  | N/A | N/A |
| 10578916 | Sc4mol                               | N/A | N/A |
| 10578922 | Klh2                                 | N/A | N/A |
| 10578950 | ---                                  | N/A | N/A |
| 10578952 | BC030870                             | N/A | N/A |
| 10578955 | ---                                  | N/A | N/A |
| 10578957 | ---                                  | N/A | N/A |
| 10578959 | ---                                  | N/A | N/A |
| 10578962 | Gm10661                              | N/A | N/A |
| 10578964 | 1810029B16Rik                        | N/A | N/A |
| 10578979 | ---                                  | N/A | N/A |
| 10578981 | ---                                  | N/A | N/A |
| 10578984 | Tufm                                 | N/A | N/A |
| 10578986 | Psd3                                 | N/A | N/A |
| 10578989 | Psd3                                 | N/A | N/A |
| 10579012 | Csgalnact1                           | N/A | N/A |
| 10579043 | Lzts1                                | N/A | N/A |
| 10579047 | ---                                  | N/A | N/A |
| 10579049 | Gm10033                              | N/A | N/A |
| 10579052 | Gm10033                              | N/A | N/A |
| 10579054 | Gm15319 /// 4930467E23Rik /// Trim44 | N/A | N/A |
| 10579060 | Gm15319 /// 4930467E23Rik /// Trim44 | N/A | N/A |
| 10579066 | Gm3365                               | N/A | N/A |
| 10579070 | Zfp868                               | N/A | N/A |
| 10579079 | Zfp869                               | N/A | N/A |
| 10579089 | Zfp866                               | N/A | N/A |
| 10579119 | Ndufa13 /// Tssk6                    | N/A | N/A |
| 10579142 | ---                                  | N/A | N/A |
| 10579144 | 9130404D08Rik                        | N/A | N/A |
| 10579165 | Ncan                                 | N/A | N/A |
| 10579181 | Rfxank /// Nr2c2ap                   | N/A | N/A |
| 10579199 | Slc25a42                             | N/A | N/A |
| 10579234 | Upf1                                 | N/A | N/A |
| 10579262 | Crtc1                                | N/A | N/A |
| 10579277 | Klh26                                | N/A | N/A |
| 10579287 | Tmem59l                              | N/A | N/A |
| 10579296 | 2810428I15Rik                        | N/A | N/A |
| 10579302 | Uba52 /// Gm5239 /// Gm7866          | N/A | N/A |
| 10579335 | Pgpep1                               | N/A | N/A |
| 10579341 | Mpv17l2                              | N/A | N/A |
| 10579347 | Ifi30                                | N/A | N/A |
| 10579356 | Pik3r2                               | N/A | N/A |
| 10579373 | Mast3                                | N/A | N/A |
| 10579437 | Ccdc124                              | N/A | N/A |
| 10579468 | Haus8                                | N/A | N/A |
| 10579479 | Nr2f6                                | N/A | N/A |
| 10579500 | Abhd8                                | N/A | N/A |
| 10579508 | Ano8 /// Dda1                        | N/A | N/A |
| 10579525 | Plvap                                | N/A | N/A |
| 10579532 | Bst2                                 | N/A | N/A |
| 10579538 | Tmem221                              | N/A | N/A |

|          |                                                                                      |     |     |
|----------|--------------------------------------------------------------------------------------|-----|-----|
| 10579548 | Git25d1                                                                              | N/A | N/A |
| 10579550 | Unc13a                                                                               | N/A | N/A |
| 10579554 | Unc13a                                                                               | N/A | N/A |
| 10579600 | Jak3 /// Gm9933                                                                      | N/A | N/A |
| 10579607 | Cnot8                                                                                | N/A | N/A |
| 10579659 | Hmgn2 /// Gm6724                                                                     | N/A | N/A |
| 10579663 | Eps1511                                                                              | N/A | N/A |
| 10579724 | Slc35e1                                                                              | N/A | N/A |
| 10579736 | 9130011J15Rik                                                                        | N/A | N/A |
| 10579744 | Large                                                                                | N/A | N/A |
| 10579763 | ---                                                                                  | N/A | N/A |
| 10579765 | ---                                                                                  | N/A | N/A |
| 10579767 | ---                                                                                  | N/A | N/A |
| 10579769 | Gapdh /// Gm16374 /// Gm4609 /// Gm3200 /// Gm2451 /// Gm10293                       | N/A | N/A |
| 10579772 | ---                                                                                  | N/A | N/A |
| 10579774 | Gm10649                                                                              | N/A | N/A |
| 10579799 | Tmem184c                                                                             | N/A | N/A |
| 10579823 | ---                                                                                  | N/A | N/A |
| 10579828 | Rps25 /// Gm4963                                                                     | N/A | N/A |
| 10579830 | Rbmxrt                                                                               | N/A | N/A |
| 10579833 | Lsm6 /// Gm10043                                                                     | N/A | N/A |
| 10579839 | Rpl21 /// Gm6813 /// Gm16416 /// Rpl21-ps12 /// Rpl21-ps14 /// Rpl21-ps10 /// Gm8054 | N/A | N/A |
| 10579852 | Mmaa                                                                                 | N/A | N/A |
| 10579860 | Smad1                                                                                | N/A | N/A |
| 10579872 | Tpd52                                                                                | N/A | N/A |
| 10579910 | Zc3h15                                                                               | N/A | N/A |
| 10579913 | ---                                                                                  | N/A | N/A |
| 10579915 | Smarca5                                                                              | N/A | N/A |
| 10579925 | Gab1                                                                                 | N/A | N/A |
| 10579952 | ---                                                                                  | N/A | N/A |
| 10579974 | Tbc1d9 /// Gm10645                                                                   | N/A | N/A |
| 10579987 | Scoc                                                                                 | N/A | N/A |
| 10579991 | ---                                                                                  | N/A | N/A |
| 10579993 | Adam4 /// Gm4787                                                                     | N/A | N/A |
| 10579996 | Tecr                                                                                 | N/A | N/A |
| 10580010 | Pkn1                                                                                 | N/A | N/A |
| 10580033 | Cd97                                                                                 | N/A | N/A |
| 10580056 | Gm10644 /// Lphn1                                                                    | N/A | N/A |
| 10580058 | 2210011C24Rik                                                                        | N/A | N/A |
| 10580077 | Rln3                                                                                 | N/A | N/A |
| 10580080 | Gm10643                                                                              | N/A | N/A |
| 10580135 | Mir181d                                                                              | N/A | N/A |
| 10580137 | Mir181c                                                                              | N/A | N/A |
| 10580155 | D8Erttd738e                                                                          | N/A | N/A |
| 10580160 | Mri1                                                                                 | N/A | N/A |
| 10580169 | Ccdc130                                                                              | N/A | N/A |
| 10580183 | Ier2                                                                                 | N/A | N/A |
| 10580188 | Nacc1                                                                                | N/A | N/A |
| 10580191 | Nfix                                                                                 | N/A | N/A |
| 10580219 | Calr                                                                                 | N/A | N/A |
| 10580231 | ---                                                                                  | N/A | N/A |
| 10580233 | Gcdh                                                                                 | N/A | N/A |
| 10580247 | Mast1                                                                                | N/A | N/A |
| 10580274 | Rnaseh2a                                                                             | N/A | N/A |
| 10580300 | Asna1                                                                                | N/A | N/A |
| 10580309 | Wdr83                                                                                | N/A | N/A |
| 10580331 | Vps35                                                                                | N/A | N/A |
| 10580382 | Neto2                                                                                | N/A | N/A |
| 10580391 | Irfg1                                                                                | N/A | N/A |
| 10580411 | ---                                                                                  | N/A | N/A |
| 10580450 | ---                                                                                  | N/A | N/A |
| 10580452 | Siah1a /// Gm10638                                                                   | N/A | N/A |
| 10580457 | N4bp1                                                                                | N/A | N/A |
| 10580467 | Gm10637                                                                              | N/A | N/A |
| 10580469 | Cbln1                                                                                | N/A | N/A |
| 10580473 | Zfp423                                                                               | N/A | N/A |
| 10580486 | Brd7                                                                                 | N/A | N/A |
| 10580504 | Snx20                                                                                | N/A | N/A |
| 10580516 | Gm6625                                                                               | N/A | N/A |
| 10580519 | ---                                                                                  | N/A | N/A |
| 10580522 | Tox3                                                                                 | N/A | N/A |
| 10580534 | ---                                                                                  | N/A | N/A |
| 10580537 | Aktip /// Rbl2                                                                       | N/A | N/A |
| 10580577 | Irx3                                                                                 | N/A | N/A |
| 10580590 | Gapdh /// Gm16374 /// Gm2606 /// Gm4609 /// Gm3200 /// Gm2451 /// Gm10293            | N/A | N/A |
| 10580622 | Ces1b                                                                                | N/A | N/A |
| 10580624 | Ces1c                                                                                | N/A | N/A |
| 10580635 | Ces1d                                                                                | N/A | N/A |
| 10580649 | Ces1e                                                                                | N/A | N/A |
| 10580663 | Ces1f                                                                                | N/A | N/A |
| 10580678 | Ces1g                                                                                | N/A | N/A |
| 10580704 | Amfr                                                                                 | N/A | N/A |
| 10580722 | Nudt21                                                                               | N/A | N/A |
| 10580733 | Bbs2                                                                                 | N/A | N/A |

|          |                          |     |     |
|----------|--------------------------|-----|-----|
| 10580752 | 9330175E14Rik            | N/A | N/A |
| 10580754 | 9330175E14Rik            | N/A | N/A |
| 10580756 | Fam192a                  | N/A | N/A |
| 10580765 | Plip                     | N/A | N/A |
| 10580782 | Polr2c /// Dok4          | N/A | N/A |
| 10580805 | Gm10286                  | N/A | N/A |
| 10580807 | Kifc3                    | N/A | N/A |
| 10580850 | Cngb1                    | N/A | N/A |
| 10580852 | Cngb1                    | N/A | N/A |
| 10580868 | ---                      | N/A | N/A |
| 10580870 | Zfp319                   | N/A | N/A |
| 10580872 | Zfp319                   | N/A | N/A |
| 10580875 | Gtl3                     | N/A | N/A |
| 10580885 | Csnk2a2                  | N/A | N/A |
| 10580903 | ---                      | N/A | N/A |
| 10580905 | Cnot1                    | N/A | N/A |
| 10580957 | Slc38a7                  | N/A | N/A |
| 10580969 | Got2 /// Gm10874         | N/A | N/A |
| 10580981 | ---                      | N/A | N/A |
| 10580984 | ---                      | N/A | N/A |
| 10580986 | Rbmxt                    | N/A | N/A |
| 10580990 | Cdh8                     | N/A | N/A |
| 10581009 | LOC280487                | N/A | N/A |
| 10581013 | Cdh11                    | N/A | N/A |
| 10581027 | Rplp0                    | N/A | N/A |
| 10581031 | ---                      | N/A | N/A |
| 10581033 | ---                      | N/A | N/A |
| 10581036 | Tk2                      | N/A | N/A |
| 10581061 | Cmtm4                    | N/A | N/A |
| 10581069 | Gm9853                   | N/A | N/A |
| 10581073 | Dync1li2                 | N/A | N/A |
| 10581111 | Nae1                     | N/A | N/A |
| 10581181 | Tradd                    | N/A | N/A |
| 10581188 | 4931428F04Rik /// Nol3   | N/A | N/A |
| 10581212 | Mir328                   | N/A | N/A |
| 10581214 | Lrrc29                   | N/A | N/A |
| 10581266 | Tppp3                    | N/A | N/A |
| 10581271 | Zdhhc1                   | N/A | N/A |
| 10581289 | Atp6v0d1                 | N/A | N/A |
| 10581306 | Rps2                     | N/A | N/A |
| 10581308 | Myl6 /// Gm8894          | N/A | N/A |
| 10581336 | Gfod2                    | N/A | N/A |
| 10581340 | Ranbp10                  | N/A | N/A |
| 10581355 | Ctrl                     | N/A | N/A |
| 10581363 | Cenpt                    | N/A | N/A |
| 10581388 | Lcat                     | N/A | N/A |
| 10581395 | Slc12a4                  | N/A | N/A |
| 10581448 | ---                      | N/A | N/A |
| 10581450 | Ddx28                    | N/A | N/A |
| 10581455 | Esrp2                    | N/A | N/A |
| 10581473 | Slc7a6os                 | N/A | N/A |
| 10581491 | A930006D01Rik            | N/A | N/A |
| 10581493 | Pdxp                     | N/A | N/A |
| 10581495 | Rplp1                    | N/A | N/A |
| 10581499 | Chtf8                    | N/A | N/A |
| 10581505 | Rpl10                    | N/A | N/A |
| 10581507 | Cog8 /// Pdf /// Gm10627 | N/A | N/A |
| 10581523 | Terf2                    | N/A | N/A |
| 10581535 | Rps18 /// Gm10260        | N/A | N/A |
| 10581547 | Nob1                     | N/A | N/A |
| 10581558 | Rps26 /// Gm6654         | N/A | N/A |
| 10581560 | Psm7                     | N/A | N/A |
| 10581569 | ---                      | N/A | N/A |
| 10581571 | 4922502B01Rik            | N/A | N/A |
| 10581573 | ---                      | N/A | N/A |
| 10581575 | Wdr70 /// Gm1943         | N/A | N/A |
| 10581605 | Hp                       | N/A | N/A |
| 10581625 | 2400003C14Rik            | N/A | N/A |
| 10581636 | Atxn1l                   | N/A | N/A |
| 10581640 | ---                      | N/A | N/A |
| 10581643 | ---                      | N/A | N/A |
| 10581645 | Marveld3                 | N/A | N/A |
| 10581654 | Calb2                    | N/A | N/A |
| 10581674 | Sf3b3                    | N/A | N/A |
| 10581729 | Ddx19a                   | N/A | N/A |
| 10581737 | Ddx19b                   | N/A | N/A |
| 10581772 | Glg1                     | N/A | N/A |
| 10581800 | Rfwd3                    | N/A | N/A |
| 10581813 | Mkl                      | N/A | N/A |
| 10581865 | Ldh                      | N/A | N/A |
| 10581902 | Cfdp1                    | N/A | N/A |
| 10581910 | Tmem170                  | N/A | N/A |
| 10581917 | Tmem231                  | N/A | N/A |
| 10581926 | Adat1                    | N/A | N/A |

|          |                             |     |     |
|----------|-----------------------------|-----|-----|
| 10581940 | Kars                        | N/A | N/A |
| 10581957 | 0610007P22Rik               | N/A | N/A |
| 10581990 | ---                         | N/A | N/A |
| 10581992 | Maf                         | N/A | N/A |
| 10581996 | Cdyl2                       | N/A | N/A |
| 10582006 | Gm10620                     | N/A | N/A |
| 10582008 | 2310061C15Rik               | N/A | N/A |
| 10582069 | Sdr42e1                     | N/A | N/A |
| 10582074 | Mphosph6                    | N/A | N/A |
| 10582078 | ---                         | N/A | N/A |
| 10582080 | ---                         | N/A | N/A |
| 10582094 | Mbtps1                      | N/A | N/A |
| 10582162 | Cotl1                       | N/A | N/A |
| 10582171 | Zdhhc7                      | N/A | N/A |
| 10582188 | Gse1 /// 1700016A09Rik      | N/A | N/A |
| 10582229 | 1110003O08Rik               | N/A | N/A |
| 10582231 | Fbxo31                      | N/A | N/A |
| 10582241 | Zcchc14                     | N/A | N/A |
| 10582260 | ---                         | N/A | N/A |
| 10582275 | Slc7a5                      | N/A | N/A |
| 10582287 | Car5a /// BC048644          | N/A | N/A |
| 10582295 | Odc1                        | N/A | N/A |
| 10582299 | Trhr2                       | N/A | N/A |
| 10582303 | Cyba                        | N/A | N/A |
| 10582310 | Mwd                         | N/A | N/A |
| 10582330 | Rnf166                      | N/A | N/A |
| 10582376 | Fam38a                      | N/A | N/A |
| 10582403 | Galns                       | N/A | N/A |
| 10582427 | Cbfa2t3                     | N/A | N/A |
| 10582445 | Ankrd11                     | N/A | N/A |
| 10582464 | ---                         | N/A | N/A |
| 10582466 | Sult5a1                     | N/A | N/A |
| 10582477 | Spata2L                     | N/A | N/A |
| 10582549 | ---                         | N/A | N/A |
| 10582551 | Dbnnd1                      | N/A | N/A |
| 10582556 | ---                         | N/A | N/A |
| 10582558 | ---                         | N/A | N/A |
| 10582562 | ---                         | N/A | N/A |
| 10582564 | ---                         | N/A | N/A |
| 10582568 | ---                         | N/A | N/A |
| 10582572 | ---                         | N/A | N/A |
| 10582574 | ---                         | N/A | N/A |
| 10582578 | ---                         | N/A | N/A |
| 10582580 | ---                         | N/A | N/A |
| 10582582 | ---                         | N/A | N/A |
| 10582584 | ---                         | N/A | N/A |
| 10582592 | Acta1                       | N/A | N/A |
| 10582599 | Nup133                      | N/A | N/A |
| 10582642 | Taf5l                       | N/A | N/A |
| 10582647 | ---                         | N/A | N/A |
| 10582649 | Pgbd5                       | N/A | N/A |
| 10582658 | Agt                         | N/A | N/A |
| 10582664 | 2310022B05Rik               | N/A | N/A |
| 10582669 | Ttc13                       | N/A | N/A |
| 10582694 | Fam89a                      | N/A | N/A |
| 10582699 | 2810004N23Rik /// Gnpat     | N/A | N/A |
| 10582708 | Exoc8                       | N/A | N/A |
| 10582712 | Egln1                       | N/A | N/A |
| 10582719 | Sipa1l2                     | N/A | N/A |
| 10582743 | Pcnxl2                      | N/A | N/A |
| 10582809 | Tk1                         | N/A | N/A |
| 10582814 | Tomm20                      | N/A | N/A |
| 10582821 | ---                         | N/A | N/A |
| 10582823 | Rbm34                       | N/A | N/A |
| 10582837 | ---                         | N/A | N/A |
| 10582839 | Gm9909                      | N/A | N/A |
| 10582843 | Itgb1                       | N/A | N/A |
| 10582845 | ---                         | N/A | N/A |
| 10582860 | A530040E14Rik               | N/A | N/A |
| 10582862 | Sp140 /// Arhgef12          | N/A | N/A |
| 10582874 | Sp110                       | N/A | N/A |
| 10582877 | A530040E14Rik               | N/A | N/A |
| 10582879 | Csprs /// Gm7609 /// Gm7592 | N/A | N/A |
| 10582882 | ---                         | N/A | N/A |
| 10582884 | ---                         | N/A | N/A |
| 10582888 | ---                         | N/A | N/A |
| 10582890 | ---                         | N/A | N/A |
| 10582896 | ---                         | N/A | N/A |
| 10582916 | ---                         | N/A | N/A |
| 10582918 | ---                         | N/A | N/A |
| 10582925 | Alkbh8                      | N/A | N/A |
| 10582939 | ---                         | N/A | N/A |
| 10582941 | Cwf19l2                     | N/A | N/A |
| 10582978 | 8430410K20Rik               | N/A | N/A |

|          |                                |     |     |
|----------|--------------------------------|-----|-----|
| 10582983 | LOC280487                      | N/A | N/A |
| 10583021 | Pdgfd                          | N/A | N/A |
| 10583032 | ---                            | N/A | N/A |
| 10583034 | Dcun1d5                        | N/A | N/A |
| 10583142 | Rpl29 /// Gm3550 /// Rpl29-ps2 | N/A | N/A |
| 10583145 | Tmem123                        | N/A | N/A |
| 10583163 | Trpc6                          | N/A | N/A |
| 10583179 | Pgr                            | N/A | N/A |
| 10583195 | Gm16485                        | N/A | N/A |
| 10583197 | ---                            | N/A | N/A |
| 10583199 | ---                            | N/A | N/A |
| 10583201 | ---                            | N/A | N/A |
| 10583203 | Phxr4                          | N/A | N/A |
| 10583207 | Maml2                          | N/A | N/A |
| 10583228 | Fam76b                         | N/A | N/A |
| 10583242 | Sesn3                          | N/A | N/A |
| 10583254 | Cwc15                          | N/A | N/A |
| 10583262 | ---                            | N/A | N/A |
| 10583264 | Mre11a                         | N/A | N/A |
| 10583286 | Gpr83                          | N/A | N/A |
| 10583297 | Taf1d                          | N/A | N/A |
| 10583310 | Taf1d                          | N/A | N/A |
| 10583312 | Taf1d                          | N/A | N/A |
| 10583314 | Taf1d                          | N/A | N/A |
| 10583316 | Taf1d                          | N/A | N/A |
| 10583318 | Taf1d                          | N/A | N/A |
| 10583320 | BC017612                       | N/A | N/A |
| 10583324 | ---                            | N/A | N/A |
| 10583340 | Npm1                           | N/A | N/A |
| 10583343 | ---                            | N/A | N/A |
| 10583345 | ---                            | N/A | N/A |
| 10583376 | Olfir829                       | N/A | N/A |
| 10583380 | Olfir832                       | N/A | N/A |
| 10583384 | ---                            | N/A | N/A |
| 10583386 | Olfir835                       | N/A | N/A |
| 10583390 | Olfir837                       | N/A | N/A |
| 10583394 | Olfir845                       | N/A | N/A |
| 10583396 | Olfir849                       | N/A | N/A |
| 10583398 | Olfir851                       | N/A | N/A |
| 10583400 | Olfir855                       | N/A | N/A |
| 10583402 | Zfp317                         | N/A | N/A |
| 10583416 | ---                            | N/A | N/A |
| 10583432 | ---                            | N/A | N/A |
| 10583436 | Olfir869                       | N/A | N/A |
| 10583444 | Olfir39                        | N/A | N/A |
| 10583446 | Olfir873                       | N/A | N/A |
| 10583448 | Rpl21                          | N/A | N/A |
| 10583450 | Zfp846                         | N/A | N/A |
| 10583459 | 5730577I03Rik                  | N/A | N/A |
| 10583465 | Ubl5 /// Fbx12                 | N/A | N/A |
| 10583472 | Pin1                           | N/A | N/A |
| 10583485 | Angptl6 /// A230050P20Rik      | N/A | N/A |
| 10583508 | Mrpl4                          | N/A | N/A |
| 10583519 | Icam1                          | N/A | N/A |
| 10583535 | Icam5                          | N/A | N/A |
| 10583548 | Raver1                         | N/A | N/A |
| 10583573 | Kri1 /// Atg4d                 | N/A | N/A |
| 10583586 | Slc44a2                        | N/A | N/A |
| 10583610 | Ilf3                           | N/A | N/A |
| 10583634 | Qtrt1                          | N/A | N/A |
| 10583647 | Dnm2 /// Tmed1                 | N/A | N/A |
| 10583676 | Carm1 /// Yipf2                | N/A | N/A |
| 10583694 | 1810026J23Rik                  | N/A | N/A |
| 10583697 | Smarca4                        | N/A | N/A |
| 10583732 | Ldlr                           | N/A | N/A |
| 10583753 | Gm6484                         | N/A | N/A |
| 10583759 | Ccdc159                        | N/A | N/A |
| 10583773 | BC018242                       | N/A | N/A |
| 10583785 | 2310047B19Rik                  | N/A | N/A |
| 10583788 | Prkcsh                         | N/A | N/A |
| 10583806 | ---                            | N/A | N/A |
| 10583820 | Zfp872                         | N/A | N/A |
| 10583825 | Zfp809                         | N/A | N/A |
| 10583847 | Bbs9                           | N/A | N/A |
| 10583887 | Npsr1                          | N/A | N/A |
| 10583898 | Gm10701                        | N/A | N/A |
| 10583900 | Cypt4 /// Cypt9 /// Cypt10     | N/A | N/A |
| 10583903 | ---                            | N/A | N/A |
| 10583905 | Sep 07                         | N/A | N/A |
| 10583920 | Eepd1                          | N/A | N/A |
| 10583929 | B3gat1                         | N/A | N/A |
| 10583942 | Thyn1                          | N/A | N/A |
| 10583952 | Ncapd3                         | N/A | N/A |
| 10583992 | Igsf9b                         | N/A | N/A |

|          |                                 |     |     |
|----------|---------------------------------|-----|-----|
| 10584013 | ---                             | N/A | N/A |
| 10584024 | Opcml                           | N/A | N/A |
| 10584034 | Snx19                           | N/A | N/A |
| 10584057 | Zbtb44                          | N/A | N/A |
| 10584067 | Zbtb44                          | N/A | N/A |
| 10584069 | ---                             | N/A | N/A |
| 10584071 | Prdm10                          | N/A | N/A |
| 10584095 | Nfrkb                           | N/A | N/A |
| 10584120 | ---                             | N/A | N/A |
| 10584122 | Rpl21                           | N/A | N/A |
| 10584124 | Arhgap32                        | N/A | N/A |
| 10584162 | Tmed2                           | N/A | N/A |
| 10584165 | Kirrel3                         | N/A | N/A |
| 10584194 | Srpr                            | N/A | N/A |
| 10584200 | Rpsd4                           | N/A | N/A |
| 10584208 | Cdon                            | N/A | N/A |
| 10584229 | ---                             | N/A | N/A |
| 10584231 | Pus3                            | N/A | N/A |
| 10584252 | Gm9513                          | N/A | N/A |
| 10584259 | Fez1                            | N/A | N/A |
| 10584271 | Tmem218                         | N/A | N/A |
| 10584276 | Sec61g                          | N/A | N/A |
| 10584280 | Hepacam                         | N/A | N/A |
| 10584309 | BC024479                        | N/A | N/A |
| 10584315 | ---                             | N/A | N/A |
| 10584325 | Vsig2                           | N/A | N/A |
| 10584334 | Siae                            | N/A | N/A |
| 10584350 | Tpt1p /// Tpt1 /// Gm6790       | N/A | N/A |
| 10584352 | Olfr874                         | N/A | N/A |
| 10584354 | Olfr875                         | N/A | N/A |
| 10584356 | Olfr876                         | N/A | N/A |
| 10584358 | Olfr877                         | N/A | N/A |
| 10584360 | Olfr145                         | N/A | N/A |
| 10584362 | Olfr878                         | N/A | N/A |
| 10584364 | Olfr881                         | N/A | N/A |
| 10584366 | Olfr883                         | N/A | N/A |
| 10584368 | Olfr885 /// Olfr884             | N/A | N/A |
| 10584370 | Olfr885 /// Olfr884             | N/A | N/A |
| 10584372 | Olfr887                         | N/A | N/A |
| 10584374 | Olfr888                         | N/A | N/A |
| 10584376 | Olfr889                         | N/A | N/A |
| 10584380 | ---                             | N/A | N/A |
| 10584384 | Olfr894                         | N/A | N/A |
| 10584386 | Olfr143                         | N/A | N/A |
| 10584399 | Olfr898                         | N/A | N/A |
| 10584405 | Olfr147                         | N/A | N/A |
| 10584407 | Olfr901                         | N/A | N/A |
| 10584409 | Olfr902                         | N/A | N/A |
| 10584414 | Olfr904                         | N/A | N/A |
| 10584416 | Olfr905                         | N/A | N/A |
| 10584418 | Olfr906                         | N/A | N/A |
| 10584420 | Olfr907                         | N/A | N/A |
| 10584422 | Olfr908                         | N/A | N/A |
| 10584431 | Olfr913                         | N/A | N/A |
| 10584433 | Olfr914                         | N/A | N/A |
| 10584435 | Vwa5a                           | N/A | N/A |
| 10584458 | Olfr920                         | N/A | N/A |
| 10584460 | Olfr921                         | N/A | N/A |
| 10584466 | Olfr923                         | N/A | N/A |
| 10584470 | Olfr933 /// Olfr26              | N/A | N/A |
| 10584479 | Olfr933                         | N/A | N/A |
| 10584481 | ---                             | N/A | N/A |
| 10584484 | Olfr242 /// Olfr27              | N/A | N/A |
| 10584488 | Olfr944                         | N/A | N/A |
| 10584492 | Olfr954                         | N/A | N/A |
| 10584494 | Olfr148                         | N/A | N/A |
| 10584498 | Olfr961                         | N/A | N/A |
| 10584502 | Olfr965                         | N/A | N/A |
| 10584504 | Olfr150 /// Olfr919             | N/A | N/A |
| 10584506 | Olfr967                         | N/A | N/A |
| 10584508 | Olfr969                         | N/A | N/A |
| 10584510 | Olfr970                         | N/A | N/A |
| 10584512 | Olfr971                         | N/A | N/A |
| 10584514 | Olfr972                         | N/A | N/A |
| 10584518 | Olfr974                         | N/A | N/A |
| 10584520 | Olfr978                         | N/A | N/A |
| 10584522 | Olfr981                         | N/A | N/A |
| 10584526 | Olfr982                         | N/A | N/A |
| 10584535 | ---                             | N/A | N/A |
| 10584549 | Scn3b                           | N/A | N/A |
| 10584561 | 9030425E11Rik                   | N/A | N/A |
| 10584572 | Hspa8 /// LOC624853             | N/A | N/A |
| 10584576 | Hspa8 /// Snord14d /// Snord14c | N/A | N/A |
| 10584578 | Hspa8 /// Snord14d /// Snord14c | N/A | N/A |

|          |                       |     |     |
|----------|-----------------------|-----|-----|
| 10584580 | Snord14e              | N/A | N/A |
| 10584582 | Gm10694               | N/A | N/A |
| 10584589 | Mir100                | N/A | N/A |
| 10584591 | Mirlet7a-2            | N/A | N/A |
| 10584593 | ---                   | N/A | N/A |
| 10584595 | 2610203C20Rik         | N/A | N/A |
| 10584598 | Mir125b-1             | N/A | N/A |
| 10584600 | ---                   | N/A | N/A |
| 10584602 | Gm10690               | N/A | N/A |
| 10584615 | Pvr1                  | N/A | N/A |
| 10584628 | Thy1                  | N/A | N/A |
| 10584674 | Mcarn                 | N/A | N/A |
| 10584698 | Nlr1                  | N/A | N/A |
| 10584700 | Dpagt1                | N/A | N/A |
| 10584710 | H2afx                 | N/A | N/A |
| 10584712 | Hyou1                 | N/A | N/A |
| 10584741 | Slc37a4               | N/A | N/A |
| 10584752 | Rps25 /// Gm4963      | N/A | N/A |
| 10584760 | Gm10023               | N/A | N/A |
| 10584762 | Bcl9l                 | N/A | N/A |
| 10584777 | Ddx6                  | N/A | N/A |
| 10584803 | Ift46                 | N/A | N/A |
| 10584819 | ---                   | N/A | N/A |
| 10584827 | Mpzl2                 | N/A | N/A |
| 10584835 | Mpzl3                 | N/A | N/A |
| 10584855 | Scn2b                 | N/A | N/A |
| 10584883 | Fxyd6                 | N/A | N/A |
| 10584941 | Bace1                 | N/A | N/A |
| 10584954 | Pcsk7                 | N/A | N/A |
| 10584977 | Sik3                  | N/A | N/A |
| 10585005 | Apoa1                 | N/A | N/A |
| 10585010 | Apoa4                 | N/A | N/A |
| 10585015 | Apoa5                 | N/A | N/A |
| 10585022 | Zfp259                | N/A | N/A |
| 10585037 | Bud13                 | N/A | N/A |
| 10585048 | Cadm1                 | N/A | N/A |
| 10585068 | Fam55d                | N/A | N/A |
| 10585091 | Nhp21l                | N/A | N/A |
| 10585097 | Gm5617                | N/A | N/A |
| 10585129 | Zw10                  | N/A | N/A |
| 10585169 | Drd2                  | N/A | N/A |
| 10585186 | 1600029D21Rik         | N/A | N/A |
| 10585201 | Timm8b /// AU019823   | N/A | N/A |
| 10585206 | Pih1d2                | N/A | N/A |
| 10585233 | Alg9                  | N/A | N/A |
| 10585249 | Ppp2r1b               | N/A | N/A |
| 10585282 | 2010007H06Rik         | N/A | N/A |
| 10585284 | ---                   | N/A | N/A |
| 10585286 | Arhgap20              | N/A | N/A |
| 10585301 | 9830163H01Rik /// Rdx | N/A | N/A |
| 10585325 | ---                   | N/A | N/A |
| 10585328 | 4930510E17Rik         | N/A | N/A |
| 10585331 | Exph5                 | N/A | N/A |
| 10585338 | Kdelc2                | N/A | N/A |
| 10585358 | Npat                  | N/A | N/A |
| 10585377 | ---                   | N/A | N/A |
| 10585395 | Siva1                 | N/A | N/A |
| 10585398 | Gldn                  | N/A | N/A |
| 10585417 | ldh3a                 | N/A | N/A |
| 10585428 | Dnaja4                | N/A | N/A |
| 10585438 | Crabp1                | N/A | N/A |
| 10585444 | Ireb2                 | N/A | N/A |
| 10585467 | Agphd1                | N/A | N/A |
| 10585474 | Psm4 /// AY074887     | N/A | N/A |
| 10585494 | Ube2q2                | N/A | N/A |
| 10585509 | Fbxo22                | N/A | N/A |
| 10585533 | Dnajb6                | N/A | N/A |
| 10585545 | Rcn2                  | N/A | N/A |
| 10585572 | Hmg20a                | N/A | N/A |
| 10585586 | Ube2s                 | N/A | N/A |
| 10585588 | Cspg4                 | N/A | N/A |
| 10585599 | Imp3                  | N/A | N/A |
| 10585610 | Ptpn9                 | N/A | N/A |
| 10585625 | Sin3a                 | N/A | N/A |
| 10585680 | ---                   | N/A | N/A |
| 10585697 | Gm5121                | N/A | N/A |
| 10585699 | Fabp5 /// Fabp5l2     | N/A | N/A |
| 10585759 | Ecd3                  | N/A | N/A |
| 10585767 | Ubl7                  | N/A | N/A |
| 10585823 | 1600029O15Rik         | N/A | N/A |
| 10585825 | Stoml1                | N/A | N/A |
| 10585840 | Cd276 /// Gm10657     | N/A | N/A |
| 10585842 | Nptn                  | N/A | N/A |
| 10585851 | Hcn4                  | N/A | N/A |

|          |                    |     |     |
|----------|--------------------|-----|-----|
| 10585860 | Adpgk              | N/A | N/A |
| 10585874 | Hexa               | N/A | N/A |
| 10585889 | Celf6              | N/A | N/A |
| 10585905 | Parp6              | N/A | N/A |
| 10585932 | Pkm2               | N/A | N/A |
| 10585940 | 4933407118Rik      | N/A | N/A |
| 10585956 | Myo9a              | N/A | N/A |
| 10585970 | Myo9a              | N/A | N/A |
| 10585972 | Myo9a              | N/A | N/A |
| 10585974 | Myo9a              | N/A | N/A |
| 10585976 | Myo9a              | N/A | N/A |
| 10585978 | Myo9a              | N/A | N/A |
| 10585980 | Myo9a              | N/A | N/A |
| 10585982 | Myo9a              | N/A | N/A |
| 10585984 | Myo9a              | N/A | N/A |
| 10585986 | Myo9a              | N/A | N/A |
| 10585988 | Myo9a              | N/A | N/A |
| 10585990 | Myo9a              | N/A | N/A |
| 10585992 | Myo9a              | N/A | N/A |
| 10586011 | Larp6              | N/A | N/A |
| 10586015 | 1700036A12Rik      | N/A | N/A |
| 10586076 | ---                | N/A | N/A |
| 10586110 | Cln6               | N/A | N/A |
| 10586126 | ---                | N/A | N/A |
| 10586157 | Rpl4               | N/A | N/A |
| 10586166 | ---                | N/A | N/A |
| 10586168 | Snord16a           | N/A | N/A |
| 10586170 | ---                | N/A | N/A |
| 10586172 | ---                | N/A | N/A |
| 10586174 | ---                | N/A | N/A |
| 10586176 | Snapc5             | N/A | N/A |
| 10586180 | Uchl3 /// Uchl4    | N/A | N/A |
| 10586184 | Tipin              | N/A | N/A |
| 10586227 | Dennd4a            | N/A | N/A |
| 10586244 | Dennd4a            | N/A | N/A |
| 10586246 | Dennd4a            | N/A | N/A |
| 10586248 | Dennd4a            | N/A | N/A |
| 10586250 | Dennd4a            | N/A | N/A |
| 10586252 | Dennd4a            | N/A | N/A |
| 10586254 | Dennd4a            | N/A | N/A |
| 10586284 | Dpp8               | N/A | N/A |
| 10586306 | Igdcc4             | N/A | N/A |
| 10586384 | Pdcd7              | N/A | N/A |
| 10586397 | Mtfmt              | N/A | N/A |
| 10586405 | Spg21              | N/A | N/A |
| 10586433 | Rbpms2             | N/A | N/A |
| 10586446 | ---                | N/A | N/A |
| 10586454 | D030028M11Rik      | N/A | N/A |
| 10586458 | Csnk1g1            | N/A | N/A |
| 10586477 | Ppib /// Snx22     | N/A | N/A |
| 10586484 | Fam96a             | N/A | N/A |
| 10586505 | Herc1              | N/A | N/A |
| 10586602 | Gm10647            | N/A | N/A |
| 10586604 | Rps27l             | N/A | N/A |
| 10586609 | ---                | N/A | N/A |
| 10586614 | C2cd4b             | N/A | N/A |
| 10586616 | Vps13c             | N/A | N/A |
| 10586700 | Rora               | N/A | N/A |
| 10586718 | 9530091C08Rik      | N/A | N/A |
| 10586722 | F830001A07Rik      | N/A | N/A |
| 10586724 | Narg2              | N/A | N/A |
| 10586759 | Bnip2              | N/A | N/A |
| 10586781 | Myo1e              | N/A | N/A |
| 10586812 | ---                | N/A | N/A |
| 10586814 | ---                | N/A | N/A |
| 10586816 | Sltm               | N/A | N/A |
| 10586842 | Fam63b /// Gm10642 | N/A | N/A |
| 10586844 | Adam10             | N/A | N/A |
| 10586863 | LOC280487          | N/A | N/A |
| 10586880 | Zfp280d            | N/A | N/A |
| 10586920 | Rfx7               | N/A | N/A |
| 10586933 | Nedd4              | N/A | N/A |
| 10586967 | Gm7265             | N/A | N/A |
| 10587000 | Dyx1c1             | N/A | N/A |
| 10587010 | ---                | N/A | N/A |
| 10587012 | Ccpg1              | N/A | N/A |
| 10587023 | Rab27a             | N/A | N/A |
| 10587038 | 2410004A20Rik      | N/A | N/A |
| 10587042 | Rsl24d1            | N/A | N/A |
| 10587049 | ---                | N/A | N/A |
| 10587075 | ---                | N/A | N/A |
| 10587077 | Onecut1            | N/A | N/A |
| 10587082 | Onecut1            | N/A | N/A |
| 10587085 | BC031353           | N/A | N/A |



|          |                              |     |     |
|----------|------------------------------|-----|-----|
| 10587104 | Arpp19                       | N/A | N/A |
| 10587107 | Myo5a                        | N/A | N/A |
| 10587194 | Gnb5                         | N/A | N/A |
| 10587226 | Lysmd2                       | N/A | N/A |
| 10587231 | Bmp5                         | N/A | N/A |
| 10587241 | Hmgcl1                       | N/A | N/A |
| 10587266 | Gclc                         | N/A | N/A |
| 10587284 | Elovl5                       | N/A | N/A |
| 10587299 | Ick                          | N/A | N/A |
| 10587315 | Gsta4                        | N/A | N/A |
| 10587339 | Gsta2                        | N/A | N/A |
| 10587368 | Mto1                         | N/A | N/A |
| 10587419 | Senp6                        | N/A | N/A |
| 10587446 | Myo6                         | N/A | N/A |
| 10587486 | Set /// BC085271             | N/A | N/A |
| 10587488 | Mei4                         | N/A | N/A |
| 10587495 | Irak1bp1                     | N/A | N/A |
| 10587501 | Rps27a                       | N/A | N/A |
| 10587503 | Sh3bgrl2                     | N/A | N/A |
| 10587532 | Gm5919                       | N/A | N/A |
| 10587534 | Bckdhb                       | N/A | N/A |
| 10587550 | ---                          | N/A | N/A |
| 10587552 | ---                          | N/A | N/A |
| 10587554 | Tpbp                         | N/A | N/A |
| 10587558 | Dopey1 /// Pgm3              | N/A | N/A |
| 10587610 | A330041J2Rik                 | N/A | N/A |
| 10587616 | Prss35                       | N/A | N/A |
| 10587621 | Ripply2                      | N/A | N/A |
| 10587627 | Cyb5r4                       | N/A | N/A |
| 10587633 | Mrap2                        | N/A | N/A |
| 10587639 | Nt5e                         | N/A | N/A |
| 10587651 | Rpl21                        | N/A | N/A |
| 10587653 | Snx14                        | N/A | N/A |
| 10587655 | 4930422I07Rik                | N/A | N/A |
| 10587683 | Bcl2a1b                      | N/A | N/A |
| 10587686 | ---                          | N/A | N/A |
| 10587688 | ---                          | N/A | N/A |
| 10587690 | Bcl2a1b                      | N/A | N/A |
| 10587695 | Gm2382 /// Mthfs             | N/A | N/A |
| 10587699 | Rasgrf1                      | N/A | N/A |
| 10587733 | Ctsh                         | N/A | N/A |
| 10587746 | Tmem41b                      | N/A | N/A |
| 10587776 | ---                          | N/A | N/A |
| 10587780 | Tuba1b /// Gm6682 /// Gm5620 | N/A | N/A |
| 10587782 | Zic4                         | N/A | N/A |
| 10587792 | Plscr1                       | N/A | N/A |
| 10587818 | Plscr4                       | N/A | N/A |
| 10587829 | Plod2                        | N/A | N/A |
| 10587852 | ---                          | N/A | N/A |
| 10587854 | Slc9a9                       | N/A | N/A |
| 10587871 | Paqr9                        | N/A | N/A |
| 10587873 | ---                          | N/A | N/A |
| 10587878 | ---                          | N/A | N/A |
| 10587880 | Pcolce2                      | N/A | N/A |
| 10587892 | Atr                          | N/A | N/A |
| 10587940 | ---                          | N/A | N/A |
| 10587942 | Xrn1                         | N/A | N/A |
| 10587988 | Gk5                          | N/A | N/A |
| 10588007 | Tfdp2                        | N/A | N/A |
| 10588024 | Ppia                         | N/A | N/A |
| 10588026 | Rpl7a                        | N/A | N/A |
| 10588035 | ---                          | N/A | N/A |
| 10588043 | Rbp2                         | N/A | N/A |
| 10588049 | Copb2                        | N/A | N/A |
| 10588075 | Prr23a /// Gm6406            | N/A | N/A |
| 10588077 | 2410012M07Rik                | N/A | N/A |
| 10588079 | 7420426K07Rik                | N/A | N/A |
| 10588091 | Cep70                        | N/A | N/A |
| 10588137 | Dzip1l                       | N/A | N/A |
| 10588154 | Stag1                        | N/A | N/A |
| 10588192 | Msl2                         | N/A | N/A |
| 10588201 | ---                          | N/A | N/A |
| 10588223 | Anapc13                      | N/A | N/A |
| 10588226 | Amotl2                       | N/A | N/A |
| 10588243 | Ryk                          | N/A | N/A |
| 10588263 | Slco2a1                      | N/A | N/A |
| 10588283 | Rab6b                        | N/A | N/A |
| 10588324 | ---                          | N/A | N/A |
| 10588357 | Acad11 /// Ccrl1             | N/A | N/A |
| 10588403 | Mirp13                       | N/A | N/A |
| 10588419 | Aste1                        | N/A | N/A |
| 10588429 | Pik3r4                       | N/A | N/A |
| 10588452 | Glyctk /// Mir135a-1         | N/A | N/A |
| 10588454 | Wdr82                        | N/A | N/A |

|          |                                |     |     |
|----------|--------------------------------|-----|-----|
| 10588464 | Mirlet7g                       | N/A | N/A |
| 10588482 | Poc1a                          | N/A | N/A |
| 10588495 | Dusp7                          | N/A | N/A |
| 10588499 | Rpl29 /// Gm8580 /// Rpl29-ps2 | N/A | N/A |
| 10588505 | Abhd14b                        | N/A | N/A |
| 10588509 | Pcbp4                          | N/A | N/A |
| 10588542 | Iqc5                           | N/A | N/A |
| 10588545 | ---                            | N/A | N/A |
| 10588547 | Vprbp                          | N/A | N/A |
| 10588592 | Cacna2d2                       | N/A | N/A |
| 10588642 | Npri2                          | N/A | N/A |
| 10588691 | Hyal1 /// Nat6                 | N/A | N/A |
| 10588696 | Nat6 /// Hyal1 /// Hyal3       | N/A | N/A |
| 10588707 | Ifrd2                          | N/A | N/A |
| 10588722 | Mon1a                          | N/A | N/A |
| 10588755 | Camkv                          | N/A | N/A |
| 10588819 | Cdhr4                          | N/A | N/A |
| 10588826 | Ip6k1                          | N/A | N/A |
| 10588849 | Amigo3                         | N/A | N/A |
| 10588855 | Mst1                           | N/A | N/A |
| 10588874 | Bsn                            | N/A | N/A |
| 10588876 | Nicn1                          | N/A | N/A |
| 10588893 | Rhoa                           | N/A | N/A |
| 10588899 | Gpx1                           | N/A | N/A |
| 10588903 | Usp4                           | N/A | N/A |
| 10588975 | Usp19                          | N/A | N/A |
| 10589004 | Qars                           | N/A | N/A |
| 10589030 | Qrich1                         | N/A | N/A |
| 10589059 | Mir425                         | N/A | N/A |
| 10589061 | Dalrd3 /// Wdr6                | N/A | N/A |
| 10589074 | Arih2 /// Gm10621              | N/A | N/A |
| 10589087 | Prkar2a                        | N/A | N/A |
| 10589099 | Ip6k2                          | N/A | N/A |
| 10589128 | ---                            | N/A | N/A |
| 10589130 | Celsr3                         | N/A | N/A |
| 10589190 | ---                            | N/A | N/A |
| 10589192 | Tmem89                         | N/A | N/A |
| 10589196 | Uqcrc1                         | N/A | N/A |
| 10589327 | Ucn2                           | N/A | N/A |
| 10589368 | Plxbn1                         | N/A | N/A |
| 10589413 | Nme6                           | N/A | N/A |
| 10589420 | Cdc25a                         | N/A | N/A |
| 10589438 | Mtap4                          | N/A | N/A |
| 10589462 | Mtap4                          | N/A | N/A |
| 10589464 | Gm10615                        | N/A | N/A |
| 10589466 | Smarcc1                        | N/A | N/A |
| 10589494 | Cspg5                          | N/A | N/A |
| 10589503 | 2610002117Rik                  | N/A | N/A |
| 10589511 | Scap                           | N/A | N/A |
| 10589565 | Setd2                          | N/A | N/A |
| 10589587 | Setd2                          | N/A | N/A |
| 10589695 | Rtp3                           | N/A | N/A |
| 10589756 | Epm2aip1                       | N/A | N/A |
| 10589761 | Trank1                         | N/A | N/A |
| 10589773 | Trank1                         | N/A | N/A |
| 10589784 | Dclk3                          | N/A | N/A |
| 10589793 | ---                            | N/A | N/A |
| 10589798 | ---                            | N/A | N/A |
| 10589800 | Clasp2                         | N/A | N/A |
| 10589846 | ---                            | N/A | N/A |
| 10589848 | Ubp1 /// Fbxl2                 | N/A | N/A |
| 10589870 | ---                            | N/A | N/A |
| 10589884 | Bcl2a1c                        | N/A | N/A |
| 10589886 | ---                            | N/A | N/A |
| 10589889 | Glb1                           | N/A | N/A |
| 10589907 | Glb1                           | N/A | N/A |
| 10589909 | Trim71                         | N/A | N/A |
| 10589911 | ---                            | N/A | N/A |
| 10589913 | Dync1li1                       | N/A | N/A |
| 10589927 | ---                            | N/A | N/A |
| 10589929 | Cmtm6                          | N/A | N/A |
| 10589938 | Gpd1l                          | N/A | N/A |
| 10589940 | Osbpl10                        | N/A | N/A |
| 10589955 | Stt3b /// Gm9757               | N/A | N/A |
| 10589958 | ---                            | N/A | N/A |
| 10589974 | LOC280487                      | N/A | N/A |
| 10589982 | Azi2                           | N/A | N/A |
| 10590004 | Golga4                         | N/A | N/A |
| 10590029 | ---                            | N/A | N/A |
| 10590060 | Ctdspl                         | N/A | N/A |
| 10590071 | Mir26a-1                       | N/A | N/A |
| 10590135 | LOC100038738                   | N/A | N/A |
| 10590149 | Xylb                           | N/A | N/A |
| 10590169 | Acvr2b                         | N/A | N/A |

|          |                             |     |     |
|----------|-----------------------------|-----|-----|
| 10590182 | Exog                        | N/A | N/A |
| 10590191 | Wdr48 /// Gorasp1           | N/A | N/A |
| 10590245 | Slc25a38                    | N/A | N/A |
| 10590253 | Rpsa /// Rpsa-ps10          | N/A | N/A |
| 10590263 | ---                         | N/A | N/A |
| 10590265 | ---                         | N/A | N/A |
| 10590267 | Snora62                     | N/A | N/A |
| 10590269 | Mobp                        | N/A | N/A |
| 10590277 | ---                         | N/A | N/A |
| 10590279 | Myrip                       | N/A | N/A |
| 10590298 | Eif1b                       | N/A | N/A |
| 10590304 | ---                         | N/A | N/A |
| 10590306 | Entpd3                      | N/A | N/A |
| 10590323 | 5830454E08Rik               | N/A | N/A |
| 10590325 | Ctnnb1                      | N/A | N/A |
| 10590343 | Trak1                       | N/A | N/A |
| 10590381 | Vipr1                       | N/A | N/A |
| 10590383 | Deb1                        | N/A | N/A |
| 10590407 | Zfp651                      | N/A | N/A |
| 10590433 | 1700048O20Rik               | N/A | N/A |
| 10590445 | Snrk                        | N/A | N/A |
| 10590452 | Abhd5                       | N/A | N/A |
| 10590462 | Mir138-1                    | N/A | N/A |
| 10590467 | D9Ert402e                   | N/A | N/A |
| 10590479 | Zfp167                      | N/A | N/A |
| 10590487 | Gm8008                      | N/A | N/A |
| 10590529 | Tmem42                      | N/A | N/A |
| 10590549 | Exosc7                      | N/A | N/A |
| 10590563 | Lars2                       | N/A | N/A |
| 10590586 | Limd1                       | N/A | N/A |
| 10590597 | Sacm1l                      | N/A | N/A |
| 10590628 | Ccr3                        | N/A | N/A |
| 10590646 | ---                         | N/A | N/A |
| 10590654 | Aasdhppt                    | N/A | N/A |
| 10590663 | Gria4                       | N/A | N/A |
| 10590690 | Dync2h1                     | N/A | N/A |
| 10590779 | ---                         | N/A | N/A |
| 10590791 | Birc2                       | N/A | N/A |
| 10590799 | C330006D17Rik               | N/A | N/A |
| 10590808 | Yap1                        | N/A | N/A |
| 10590821 | 9230110C19Rik               | N/A | N/A |
| 10590830 | AK129341                    | N/A | N/A |
| 10590844 | Arhgap42                    | N/A | N/A |
| 10590860 | Arhgap42                    | N/A | N/A |
| 10590865 | Cntn5                       | N/A | N/A |
| 10590888 | ---                         | N/A | N/A |
| 10590890 | ---                         | N/A | N/A |
| 10590909 | Endod1                      | N/A | N/A |
| 10590918 | Amotl1                      | N/A | N/A |
| 10590972 | Mif                         | N/A | N/A |
| 10591009 | Med17                       | N/A | N/A |
| 10591022 | 4931406C07Rik               | N/A | N/A |
| 10591035 | 5830418K08Rik               | N/A | N/A |
| 10591090 | Fat3                        | N/A | N/A |
| 10591092 | Fat3                        | N/A | N/A |
| 10591094 | Fat3                        | N/A | N/A |
| 10591110 | Fat3                        | N/A | N/A |
| 10591112 | Fat3                        | N/A | N/A |
| 10591114 | Fat3                        | N/A | N/A |
| 10591116 | Fat3                        | N/A | N/A |
| 10591118 | Fat3                        | N/A | N/A |
| 10591120 | Fat3                        | N/A | N/A |
| 10591123 | Fat3                        | N/A | N/A |
| 10591125 | Fat3                        | N/A | N/A |
| 10591127 | Fat3                        | N/A | N/A |
| 10591129 | Fat3                        | N/A | N/A |
| 10591131 | Fat3                        | N/A | N/A |
| 10591135 | Fat3                        | N/A | N/A |
| 10591164 | Zfp558                      | N/A | N/A |
| 10591180 | Olfir828                    | N/A | N/A |
| 10591182 | ---                         | N/A | N/A |
| 10591184 | ---                         | N/A | N/A |
| 10591190 | Olfir846                    | N/A | N/A |
| 10591194 | Olfir850                    | N/A | N/A |
| 10591198 | Olfir854                    | N/A | N/A |
| 10591200 | Olfir856-ps1                | N/A | N/A |
| 10591208 | Uba52 /// Gm5239 /// Gm7866 | N/A | N/A |
| 10591210 | Olfir866                    | N/A | N/A |
| 10591214 | Olfir867                    | N/A | N/A |
| 10591216 | Olfir870                    | N/A | N/A |
| 10591218 | ---                         | N/A | N/A |
| 10591228 | Zfp26                       | N/A | N/A |
| 10591241 | Zfp426                      | N/A | N/A |
| 10591253 | 5730601F06Rik               | N/A | N/A |

|          |                     |     |     |
|----------|---------------------|-----|-----|
| 10591263 | Fbxl12              | N/A | N/A |
| 10591270 | Olfr2               | N/A | N/A |
| 10591369 | Dnmt1               | N/A | N/A |
| 10591416 | ---                 | N/A | N/A |
| 10591430 | Raver1              | N/A | N/A |
| 10591472 | Cdc37               | N/A | N/A |
| 10591494 | S1pr5               | N/A | N/A |
| 10591497 | Kri1 /// Atg4d      | N/A | N/A |
| 10591517 | Cdkn2d /// Gm4694   | N/A | N/A |
| 10591535 | Mir199a-1           | N/A | N/A |
| 10591537 | Tmed1               | N/A | N/A |
| 10591544 | Yipf2 /// Carm1     | N/A | N/A |
| 10591563 | Kank2               | N/A | N/A |
| 10591608 | Dock6               | N/A | N/A |
| 10591610 | Dock6               | N/A | N/A |
| 10591612 | Dock6               | N/A | N/A |
| 10591614 | Dock6               | N/A | N/A |
| 10591616 | Dock6               | N/A | N/A |
| 10591618 | Dock6               | N/A | N/A |
| 10591620 | Dock6               | N/A | N/A |
| 10591624 | Dock6               | N/A | N/A |
| 10591626 | Dock6               | N/A | N/A |
| 10591628 | Dock6               | N/A | N/A |
| 10591630 | Dock6               | N/A | N/A |
| 10591634 | Dock6               | N/A | N/A |
| 10591653 | Tmem205             | N/A | N/A |
| 10591658 | 2310047B19Rik       | N/A | N/A |
| 10591706 | Elavl3              | N/A | N/A |
| 10591715 | Zfp653              | N/A | N/A |
| 10591726 | Ecsit               | N/A | N/A |
| 10591735 | Elof1               | N/A | N/A |
| 10591739 | Acp5                | N/A | N/A |
| 10591747 | Rpl15 /// Gm4294    | N/A | N/A |
| 10591749 | 1810064F22Rik       | N/A | N/A |
| 10591754 | Zfp599              | N/A | N/A |
| 10591773 | Hmgn2 /// Gm6724    | N/A | N/A |
| 10591781 | Anln                | N/A | N/A |
| 10591806 | rp9                 | N/A | N/A |
| 10591814 | ---                 | N/A | N/A |
| 10591867 | Rpl41               | N/A | N/A |
| 10591869 | Herpud2             | N/A | N/A |
| 10591881 | Hmgb1               | N/A | N/A |
| 10591947 | Acad8               | N/A | N/A |
| 10591960 | Vps26b              | N/A | N/A |
| 10591978 | Ntm                 | N/A | N/A |
| 10591997 | Adams8 /// Gm10700  | N/A | N/A |
| 10591999 | Gm9957              | N/A | N/A |
| 10592023 | Aplp2               | N/A | N/A |
| 10592058 | Tuba1b /// Gm5620   | N/A | N/A |
| 10592061 | Kcnj5               | N/A | N/A |
| 10592099 | Dcps                | N/A | N/A |
| 10592106 | Tirap               | N/A | N/A |
| 10592114 | Foxred1             | N/A | N/A |
| 10592138 | Rpl36 /// Gm5614    | N/A | N/A |
| 10592154 | Hyls1               | N/A | N/A |
| 10592160 | Gm6762              | N/A | N/A |
| 10592162 | ---                 | N/A | N/A |
| 10592186 | Gm9896              | N/A | N/A |
| 10592217 | Stt3a               | N/A | N/A |
| 10592237 | Ei24                | N/A | N/A |
| 10592248 | ---                 | N/A | N/A |
| 10592251 | Pknox2              | N/A | N/A |
| 10592330 | Nrgn                | N/A | N/A |
| 10592336 | Spa17               | N/A | N/A |
| 10592342 | Tbrg1               | N/A | N/A |
| 10592365 | Olfr151             | N/A | N/A |
| 10592369 | Olfr891             | N/A | N/A |
| 10592374 | Olfr916             | N/A | N/A |
| 10592376 | Olfr917             | N/A | N/A |
| 10592380 | Olfr919             | N/A | N/A |
| 10592382 | Olfr934             | N/A | N/A |
| 10592384 | Olfr935             | N/A | N/A |
| 10592391 | Olfr937             | N/A | N/A |
| 10592393 | Olfr938             | N/A | N/A |
| 10592397 | Olfr144             | N/A | N/A |
| 10592406 | Olfr952             | N/A | N/A |
| 10592408 | Olfr952 /// Olfr955 | N/A | N/A |
| 10592410 | Olfr44              | N/A | N/A |
| 10592412 | Olfr957             | N/A | N/A |
| 10592414 | Olfr958             | N/A | N/A |
| 10592420 | AW551984            | N/A | N/A |
| 10592447 | ---                 | N/A | N/A |
| 10592449 | Olfr149             | N/A | N/A |
| 10592451 | Olfr968             | N/A | N/A |

|          |                  |     |     |
|----------|------------------|-----|-----|
| 10592455 | Olf975           | N/A | N/A |
| 10592457 | Olf976           | N/A | N/A |
| 10592459 | ---              | N/A | N/A |
| 10592461 | Olf979           | N/A | N/A |
| 10592463 | Olf980           | N/A | N/A |
| 10592465 | Olf983           | N/A | N/A |
| 10592467 | Olf984           | N/A | N/A |
| 10592471 | Gramd1b          | N/A | N/A |
| 10592515 | Ubash3b          | N/A | N/A |
| 10592531 | ---              | N/A | N/A |
| 10592533 | ---              | N/A | N/A |
| 10592535 | Sor11            | N/A | N/A |
| 10592585 | Sc5d             | N/A | N/A |
| 10592618 | Tbcel            | N/A | N/A |
| 10592629 | Grik4            | N/A | N/A |
| 10592652 | 9530085L02Rik    | N/A | N/A |
| 10592719 | Oaf              | N/A | N/A |
| 10592725 | Gm10688          | N/A | N/A |
| 10592727 | Rnf26            | N/A | N/A |
| 10592731 | Gm10687          | N/A | N/A |
| 10592734 | Cbl              | N/A | N/A |
| 10592772 | Abcg4            | N/A | N/A |
| 10592790 | Hinfp            | N/A | N/A |
| 10592802 | C2cd2l           | N/A | N/A |
| 10592816 | Hmbs             | N/A | N/A |
| 10592830 | Vps11            | N/A | N/A |
| 10592847 | Myl6 /// Gm8894  | N/A | N/A |
| 10592850 | Trappc4          | N/A | N/A |
| 10592856 | Ccdc84 /// Rps25 | N/A | N/A |
| 10592886 | Gm10023          | N/A | N/A |
| 10592917 | ---              | N/A | N/A |
| 10592919 | Arcn1            | N/A | N/A |
| 10592926 | Tmem25           | N/A | N/A |
| 10592938 | Ttc36            | N/A | N/A |
| 10592942 | Mll1             | N/A | N/A |
| 10592983 | Atp5l /// Gm5426 | N/A | N/A |
| 10592988 | Ube4a            | N/A | N/A |
| 10593058 | ---              | N/A | N/A |
| 10593101 | ---              | N/A | N/A |
| 10593103 | Rnf214           | N/A | N/A |
| 10593130 | Sidt2            | N/A | N/A |
| 10593159 | Pafah1b2         | N/A | N/A |
| 10593167 | ---              | N/A | N/A |
| 10593169 | Apoc3            | N/A | N/A |
| 10593174 | Apoa4            | N/A | N/A |
| 10593191 | ---              | N/A | N/A |
| 10593193 | ---              | N/A | N/A |
| 10593196 | Gm10677          | N/A | N/A |
| 10593205 | Rexo2            | N/A | N/A |
| 10593213 | Rbm7             | N/A | N/A |
| 10593233 | Htr3a            | N/A | N/A |
| 10593258 | ---              | N/A | N/A |
| 10593293 | Ncam1            | N/A | N/A |
| 10593316 | ---              | N/A | N/A |
| 10593318 | ---              | N/A | N/A |
| 10593320 | Rpl10            | N/A | N/A |
| 10593323 | ---              | N/A | N/A |
| 10593325 | Pts              | N/A | N/A |
| 10593332 | Bco2             | N/A | N/A |
| 10593356 | Sdhd             | N/A | N/A |
| 10593361 | AU019823         | N/A | N/A |
| 10593367 | Dlat             | N/A | N/A |
| 10593413 | 2310030G06Rik    | N/A | N/A |
| 10593418 | Cryab /// Hspb2  | N/A | N/A |
| 10593421 | 1110032A03Rik    | N/A | N/A |
| 10593430 | Sik2 /// Ppp2r1b | N/A | N/A |
| 10593469 | Mir34c           | N/A | N/A |
| 10593471 | Mir34b           | N/A | N/A |
| 10593473 | 1810046K07Rik    | N/A | N/A |
| 10593483 | Fdx1             | N/A | N/A |
| 10593490 | Gm6981 /// Gapdh | N/A | N/A |
| 10593492 | Zc3h12c          | N/A | N/A |
| 10593497 | Zc3h12c          | N/A | N/A |
| 10593499 | AI593442         | N/A | N/A |
| 10593506 | ---              | N/A | N/A |
| 10593508 | Ddx10            | N/A | N/A |
| 10593526 | Atm              | N/A | N/A |
| 10593589 | Gm9963           | N/A | N/A |
| 10593591 | Acat1            | N/A | N/A |
| 10593605 | Cul5             | N/A | N/A |
| 10593634 | Elmod1           | N/A | N/A |
| 10593668 | Dmxl2            | N/A | N/A |
| 10593671 | Dmxl2            | N/A | N/A |
| 10593713 | Cib2 /// Sh2d7   | N/A | N/A |

|          |                               |     |     |
|----------|-------------------------------|-----|-----|
| 10593723 | Acsbg1                        | N/A | N/A |
| 10593740 | Wdr61                         | N/A | N/A |
| 10593751 | AY074887                      | N/A | N/A |
| 10593756 | Chrna3                        | N/A | N/A |
| 10593789 | Etfa                          | N/A | N/A |
| 10593799 | Scaper                        | N/A | N/A |
| 10593832 | ---                           | N/A | N/A |
| 10593842 | Tspan3                        | N/A | N/A |
| 10593856 | C230081A13Rik                 | N/A | N/A |
| 10593865 | LOC236598                     | N/A | N/A |
| 10593867 | Lingo1                        | N/A | N/A |
| 10593872 | Odf3l1                        | N/A | N/A |
| 10593878 | Snx33                         | N/A | N/A |
| 10593882 | ---                           | N/A | N/A |
| 10593884 | Ptpn9                         | N/A | N/A |
| 10593887 | Neil1                         | N/A | N/A |
| 10593903 | Comm4                         | N/A | N/A |
| 10593913 | 1700017B05Rik                 | N/A | N/A |
| 10593918 | Ppcdc                         | N/A | N/A |
| 10593927 | Scamp5                        | N/A | N/A |
| 10593937 | Mpi                           | N/A | N/A |
| 10593947 | Cplx3                         | N/A | N/A |
| 10593953 | lman1l                        | N/A | N/A |
| 10593966 | Csk                           | N/A | N/A |
| 10593981 | Cyp1a2                        | N/A | N/A |
| 10593988 | Clk3                          | N/A | N/A |
| 10594001 | Arid3b                        | N/A | N/A |
| 10594015 | Ccdc33                        | N/A | N/A |
| 10594044 | Islr                          | N/A | N/A |
| 10594048 | Islr2                         | N/A | N/A |
| 10594053 | Pml                           | N/A | N/A |
| 10594066 | Loxl1                         | N/A | N/A |
| 10594080 | Tbc1d21                       | N/A | N/A |
| 10594092 | Cd276                         | N/A | N/A |
| 10594103 | 2410076I21Rik                 | N/A | N/A |
| 10594110 | Neo1                          | N/A | N/A |
| 10594144 | Bbs4                          | N/A | N/A |
| 10594161 | Arih1                         | N/A | N/A |
| 10594177 | Tmem202                       | N/A | N/A |
| 10594183 | Senp8                         | N/A | N/A |
| 10594186 | ---                           | N/A | N/A |
| 10594188 | Nr2e3                         | N/A | N/A |
| 10594199 | Thsd4                         | N/A | N/A |
| 10594221 | Lrrc49                        | N/A | N/A |
| 10594241 | Gm9869                        | N/A | N/A |
| 10594244 | ---                           | N/A | N/A |
| 10594246 | Gm10655                       | N/A | N/A |
| 10594248 | Rplp1                         | N/A | N/A |
| 10594251 | Kif23                         | N/A | N/A |
| 10594277 | Paqr5                         | N/A | N/A |
| 10594289 | Glce                          | N/A | N/A |
| 10594297 | Spesp1                        | N/A | N/A |
| 10594301 | Coro2b                        | N/A | N/A |
| 10594315 | Fem1b                         | N/A | N/A |
| 10594320 | Gm10653 /// Rps2 /// Rps2-ps6 | N/A | N/A |
| 10594322 | Pias1                         | N/A | N/A |
| 10594340 | Skor1                         | N/A | N/A |
| 10594353 | Map2k5                        | N/A | N/A |
| 10594377 | 230009A05Rik                  | N/A | N/A |
| 10594381 | Iqch                          | N/A | N/A |
| 10594418 | Smad6                         | N/A | N/A |
| 10594426 | Zwilch /// Lctl               | N/A | N/A |
| 10594447 | Map2k1                        | N/A | N/A |
| 10594460 | Dis3l                         | N/A | N/A |
| 10594480 | Rab11a                        | N/A | N/A |
| 10594490 | Slc24a1                       | N/A | N/A |
| 10594513 | ---                           | N/A | N/A |
| 10594517 | Kbtbd13                       | N/A | N/A |
| 10594519 | Ostb                          | N/A | N/A |
| 10594524 | Ankdd1a                       | N/A | N/A |
| 10594538 | Plekho2                       | N/A | N/A |
| 10594540 | Plekho2                       | N/A | N/A |
| 10594549 | Gm10144                       | N/A | N/A |
| 10594551 | Zfp609                        | N/A | N/A |
| 10594561 | Trip4                         | N/A | N/A |
| 10594582 | Snx22 /// Ppib                | N/A | N/A |
| 10594590 | Snx1                          | N/A | N/A |
| 10594607 | ---                           | N/A | N/A |
| 10594609 | Fbxl22                        | N/A | N/A |
| 10594613 | Usp3                          | N/A | N/A |
| 10594631 | Aph1b                         | N/A | N/A |
| 10594636 | Ppp1r2                        | N/A | N/A |
| 10594638 | Aph1c                         | N/A | N/A |
| 10594645 | Rab8b                         | N/A | N/A |

|          |                                                                         |     |     |
|----------|-------------------------------------------------------------------------|-----|-----|
| 10594652 | Lactb                                                                   | N/A | N/A |
| 10594661 | Tpm1                                                                    | N/A | N/A |
| 10594679 | Tln2                                                                    | N/A | N/A |
| 10594745 | Mir190                                                                  | N/A | N/A |
| 10594747 | C2cd4b                                                                  | N/A | N/A |
| 10594750 | C2cd4a                                                                  | N/A | N/A |
| 10594752 | Rpl7a /// Gm4978 /// Gm16477                                            | N/A | N/A |
| 10594754 | Foxb1                                                                   | N/A | N/A |
| 10594758 | Gcnt3                                                                   | N/A | N/A |
| 10594762 | Fam81a                                                                  | N/A | N/A |
| 10594774 | Ccnb2                                                                   | N/A | N/A |
| 10594785 | Rnf111                                                                  | N/A | N/A |
| 10594798 | ---                                                                     | N/A | N/A |
| 10594800 | Fam63b                                                                  | N/A | N/A |
| 10594802 | Fam63b                                                                  | N/A | N/A |
| 10594812 | Lipc                                                                    | N/A | N/A |
| 10594825 | Aqp9                                                                    | N/A | N/A |
| 10594835 | Grin1a                                                                  | N/A | N/A |
| 10594840 | Gcom1                                                                   | N/A | N/A |
| 10594855 | Cgn1                                                                    | N/A | N/A |
| 10594879 | Tcf12                                                                   | N/A | N/A |
| 10594904 | Uba52 /// Gm7866                                                        | N/A | N/A |
| 10594907 | Rpl7a                                                                   | N/A | N/A |
| 10594909 | Gm10641                                                                 | N/A | N/A |
| 10594911 | Tex9                                                                    | N/A | N/A |
| 10594928 | Pigb /// Ccpg1                                                          | N/A | N/A |
| 10594946 | Rpl36 /// Gm13611 /// Gm5745                                            | N/A | N/A |
| 10594948 | Unc13c                                                                  | N/A | N/A |
| 10594963 | Unc13c                                                                  | N/A | N/A |
| 10594965 | Unc13c                                                                  | N/A | N/A |
| 10594967 | Unc13c                                                                  | N/A | N/A |
| 10594969 | Unc13c                                                                  | N/A | N/A |
| 10594971 | Unc13c                                                                  | N/A | N/A |
| 10594973 | Unc13c                                                                  | N/A | N/A |
| 10594986 | Rpl17                                                                   | N/A | N/A |
| 10594998 | Leo1                                                                    | N/A | N/A |
| 10595000 | Tmod3                                                                   | N/A | N/A |
| 10595013 | Tmod2                                                                   | N/A | N/A |
| 10595033 | Scg3                                                                    | N/A | N/A |
| 10595046 | ---                                                                     | N/A | N/A |
| 10595048 | ---                                                                     | N/A | N/A |
| 10595050 | Gfral                                                                   | N/A | N/A |
| 10595059 | Hcrtr2                                                                  | N/A | N/A |
| 10595070 | Fam83b                                                                  | N/A | N/A |
| 10595079 | ---                                                                     | N/A | N/A |
| 10595081 | Tinag                                                                   | N/A | N/A |
| 10595094 | 2310046A06Rik                                                           | N/A | N/A |
| 10595109 | Lrrc1                                                                   | N/A | N/A |
| 10595126 | Fbxo9                                                                   | N/A | N/A |
| 10595140 | Rn7sk                                                                   | N/A | N/A |
| 10595142 | Omt2a                                                                   | N/A | N/A |
| 10595145 | ---                                                                     | N/A | N/A |
| 10595148 | Gsta1                                                                   | N/A | N/A |
| 10595156 | Dppa5a                                                                  | N/A | N/A |
| 10595159 | Ooep                                                                    | N/A | N/A |
| 10595165 | ---                                                                     | N/A | N/A |
| 10595169 | Ddx43                                                                   | N/A | N/A |
| 10595183 | Eef1a1                                                                  | N/A | N/A |
| 10595189 | Slc17a5                                                                 | N/A | N/A |
| 10595202 | ---                                                                     | N/A | N/A |
| 10595205 | 2410127L17Rik                                                           | N/A | N/A |
| 10595209 | Gm10635                                                                 | N/A | N/A |
| 10595211 | Col12a1                                                                 | N/A | N/A |
| 10595280 | Cox7a2                                                                  | N/A | N/A |
| 10595288 | Tmem30a                                                                 | N/A | N/A |
| 10595298 | Filip1                                                                  | N/A | N/A |
| 10595306 | Impg1                                                                   | N/A | N/A |
| 10595324 | Htr1b                                                                   | N/A | N/A |
| 10595327 | Phip                                                                    | N/A | N/A |
| 10595371 | Hmgn3                                                                   | N/A | N/A |
| 10595382 | Lca5                                                                    | N/A | N/A |
| 10595392 | Elovl4                                                                  | N/A | N/A |
| 10595400 | ---                                                                     | N/A | N/A |
| 10595404 | Fam46a                                                                  | N/A | N/A |
| 10595407 | Ibtk                                                                    | N/A | N/A |
| 10595439 | ---                                                                     | N/A | N/A |
| 10595441 | Rpl7a /// Rpl7a-ps3 /// Rpl7a-ps5 /// Gm5619 /// Gm16477 /// Rpl7a-ps10 | N/A | N/A |
| 10595443 | Tpbp                                                                    | N/A | N/A |
| 10595447 | ---                                                                     | N/A | N/A |
| 10595452 | Ube2cbp                                                                 | N/A | N/A |
| 10595466 | Pgm3 /// Dopey1                                                         | N/A | N/A |
| 10595480 | Me1                                                                     | N/A | N/A |
| 10595496 | Snap91                                                                  | N/A | N/A |
| 10595529 | 4922501C03Rik                                                           | N/A | N/A |

|          |                                             |     |     |
|----------|---------------------------------------------|-----|-----|
| 10595560 | Tbx18                                       | N/A | N/A |
| 10595570 | Slc25a40                                    | N/A | N/A |
| 10595573 | Snx14                                       | N/A | N/A |
| 10595604 | Syncrip                                     | N/A | N/A |
| 10595614 | 2810026P18Rik                               | N/A | N/A |
| 10595620 | ---                                         | N/A | N/A |
| 10595622 | ---                                         | N/A | N/A |
| 10595624 | ---                                         | N/A | N/A |
| 10595626 | ---                                         | N/A | N/A |
| 10595628 | ---                                         | N/A | N/A |
| 10595630 | Gm2382 /// Mthfs                            | N/A | N/A |
| 10595633 | Bcl2a1b                                     | N/A | N/A |
| 10595636 | ---                                         | N/A | N/A |
| 10595638 | 4921528I07Rik /// Gm10634 /// 4930579C12Rik | N/A | N/A |
| 10595657 | AF529169                                    | N/A | N/A |
| 10595664 | Tmed3                                       | N/A | N/A |
| 10595668 | Ankrd34c                                    | N/A | N/A |
| 10595671 | Mir184                                      | N/A | N/A |
| 10595673 | Morf4l1                                     | N/A | N/A |
| 10595680 | Tbc1d2b                                     | N/A | N/A |
| 10595695 | Zic1                                        | N/A | N/A |
| 10595702 | 1190002N15Rik                               | N/A | N/A |
| 10595718 | Chst2                                       | N/A | N/A |
| 10595723 | 2610101N10Rik                               | N/A | N/A |
| 10595753 | Trpc1                                       | N/A | N/A |
| 10595768 | Pls1                                        | N/A | N/A |
| 10595787 | 1700065D16Rik /// Atr                       | N/A | N/A |
| 10595791 | ---                                         | N/A | N/A |
| 10595793 | Atp1b3                                      | N/A | N/A |
| 10595798 | BC043934                                    | N/A | N/A |
| 10595803 | Rnf7                                        | N/A | N/A |
| 10595805 | Rasa2                                       | N/A | N/A |
| 10595831 | Zbtb38                                      | N/A | N/A |
| 10595836 | E030011005Rik /// Zbtb38                    | N/A | N/A |
| 10595840 | Acpl2                                       | N/A | N/A |
| 10595848 | Spsb4                                       | N/A | N/A |
| 10595856 | Slc25a36                                    | N/A | N/A |
| 10595863 | Trim42                                      | N/A | N/A |
| 10595871 | Clstn2                                      | N/A | N/A |
| 10595892 | 2610303G11Rik                               | N/A | N/A |
| 10595895 | 4930579K19Rik                               | N/A | N/A |
| 10595900 | Mrps22                                      | N/A | N/A |
| 10595909 | ---                                         | N/A | N/A |
| 10595911 | Foxl2os                                     | N/A | N/A |
| 10595914 | Gm1123                                      | N/A | N/A |
| 10595924 | Pik3cb                                      | N/A | N/A |
| 10595948 | Gm6432                                      | N/A | N/A |
| 10595953 | Esy3                                        | N/A | N/A |
| 10595979 | Mras                                        | N/A | N/A |
| 10595981 | Mras                                        | N/A | N/A |
| 10595990 | Armc8                                       | N/A | N/A |
| 10596014 | Cldn18                                      | N/A | N/A |
| 10596023 | Sox14                                       | N/A | N/A |
| 10596027 | Il20rb                                      | N/A | N/A |
| 10596034 | Il20rb                                      | N/A | N/A |
| 10596041 | Il20rb                                      | N/A | N/A |
| 10596043 | Nck1                                        | N/A | N/A |
| 10596051 | Tmem22                                      | N/A | N/A |
| 10596053 | Pccb                                        | N/A | N/A |
| 10596070 | ---                                         | N/A | N/A |
| 10596072 | Ppp2r3a                                     | N/A | N/A |
| 10596093 | Gm5161                                      | N/A | N/A |
| 10596095 | Ephb1                                       | N/A | N/A |
| 10596113 | ---                                         | N/A | N/A |
| 10596115 | Ephb1                                       | N/A | N/A |
| 10596117 | Cep63                                       | N/A | N/A |
| 10596119 | Cep63                                       | N/A | N/A |
| 10596135 | ---                                         | N/A | N/A |
| 10596137 | Srprb                                       | N/A | N/A |
| 10596148 | Trf                                         | N/A | N/A |
| 10596166 | 1300017J02Rik                               | N/A | N/A |
| 10596185 | Cdv3                                        | N/A | N/A |
| 10596190 | Bfsp2                                       | N/A | N/A |
| 10596200 | Tmem108                                     | N/A | N/A |
| 10596207 | Uba5                                        | N/A | N/A |
| 10596222 | Ccr1 /// Acad11                             | N/A | N/A |
| 10596231 | Dnajc13                                     | N/A | N/A |
| 10596255 | Dnajc13                                     | N/A | N/A |
| 10596257 | Dnajc13                                     | N/A | N/A |
| 10596259 | Dnajc13                                     | N/A | N/A |
| 10596261 | Dnajc13                                     | N/A | N/A |
| 10596263 | Dnajc13                                     | N/A | N/A |
| 10596265 | Dnajc13                                     | N/A | N/A |
| 10596267 | Dnajc13                                     | N/A | N/A |



|          |                              |     |     |
|----------|------------------------------|-----|-----|
| 10596269 | Dnajc13                      | N/A | N/A |
| 10596271 | Dnajc13                      | N/A | N/A |
| 10596273 | Dnajc13                      | N/A | N/A |
| 10596275 | Dnajc13                      | N/A | N/A |
| 10596277 | Dnajc13                      | N/A | N/A |
| 10596279 | Dnajc13                      | N/A | N/A |
| 10596281 | Dnajc13                      | N/A | N/A |
| 10596303 | Acpp                         | N/A | N/A |
| 10596318 | Nudt16                       | N/A | N/A |
| 10596322 | 1700080E11Rik                | N/A | N/A |
| 10596327 | Nek11                        | N/A | N/A |
| 10596347 | Atp2c1                       | N/A | N/A |
| 10596377 | ---                          | N/A | N/A |
| 10596379 | Rpl10                        | N/A | N/A |
| 10596381 | ---                          | N/A | N/A |
| 10596383 | Col6a6                       | N/A | N/A |
| 10596394 | Col6a6                       | N/A | N/A |
| 10596403 | Gm7455                       | N/A | N/A |
| 10596409 | Gm7455                       | N/A | N/A |
| 10596428 | Col6a4                       | N/A | N/A |
| 10596433 | Glyctk                       | N/A | N/A |
| 10596442 | Ppm1m                        | N/A | N/A |
| 10596454 | Alas1                        | N/A | N/A |
| 10596465 | Acy1                         | N/A | N/A |
| 10596481 | Abhd14a                      | N/A | N/A |
| 10596489 | Gpr62                        | N/A | N/A |
| 10596492 | Parp3                        | N/A | N/A |
| 10596506 | 4930517N10Rik                | N/A | N/A |
| 10596509 | Iqcf3                        | N/A | N/A |
| 10596517 | Iqcf4                        | N/A | N/A |
| 10596521 | Grm2                         | N/A | N/A |
| 10596533 | Tex264                       | N/A | N/A |
| 10596543 | Rad54l2                      | N/A | N/A |
| 10596545 | Rad54l2                      | N/A | N/A |
| 10596568 | Rbm15b                       | N/A | N/A |
| 10596570 | Rbm15b                       | N/A | N/A |
| 10596575 | Manf                         | N/A | N/A |
| 10596583 | Dock3                        | N/A | N/A |
| 10596637 | Mapkapk3                     | N/A | N/A |
| 10596652 | Hemk1                        | N/A | N/A |
| 10596664 | Cyb561d2                     | N/A | N/A |
| 10596671 | Rassf1 /// Gm9917 /// Hyal2  | N/A | N/A |
| 10596675 | BY080835                     | N/A | N/A |
| 10596680 | Sema3b                       | N/A | N/A |
| 10596704 | Gnai2                        | N/A | N/A |
| 10596718 | Slc38a3                      | N/A | N/A |
| 10596737 | Gnat1                        | N/A | N/A |
| 10596747 | Sema3f                       | N/A | N/A |
| 10596769 | Rbm5                         | N/A | N/A |
| 10596796 | Rbm6                         | N/A | N/A |
| 10596810 | Rbm6                         | N/A | N/A |
| 10596812 | 6230427J02Rik                | N/A | N/A |
| 10596815 | Rnf123                       | N/A | N/A |
| 10596857 | Apeh                         | N/A | N/A |
| 10596880 | Bsn                          | N/A | N/A |
| 10596893 | Dag1                         | N/A | N/A |
| 10596900 | Tcta                         | N/A | N/A |
| 10596904 | Ccdc36                       | N/A | N/A |
| 10596912 | Klhdc8b                      | N/A | N/A |
| 10596925 | Ndufaf3                      | N/A | N/A |
| 10596931 | Wdr6                         | N/A | N/A |
| 10596940 | P4htm                        | N/A | N/A |
| 10596951 | Arih2                        | N/A | N/A |
| 10596958 | ---                          | N/A | N/A |
| 10596960 | Trex1 /// Atrip              | N/A | N/A |
| 10596967 | Atrip /// Trex1              | N/A | N/A |
| 10596982 | Ccdc72                       | N/A | N/A |
| 10596988 | Plxnb1                       | N/A | N/A |
| 10596990 | Fbxw21                       | N/A | N/A |
| 10597011 | Fbxw20                       | N/A | N/A |
| 10597020 | Fbxw14 /// Fbxw22 /// Fbxw28 | N/A | N/A |
| 10597031 | Fbxw22                       | N/A | N/A |
| 10597036 | Fbxw16 /// Fbxw19            | N/A | N/A |
| 10597064 | Fbxw24                       | N/A | N/A |
| 10597074 | ---                          | N/A | N/A |
| 10597076 | Fbxw18                       | N/A | N/A |
| 10597088 | Fbxw26                       | N/A | N/A |
| 10597095 | 3000002C10Rik                | N/A | N/A |
| 10597098 | Camp                         | N/A | N/A |
| 10597103 | Dhx30                        | N/A | N/A |
| 10597132 | ---                          | N/A | N/A |
| 10597134 | Scap                         | N/A | N/A |
| 10597136 | Ptpn23                       | N/A | N/A |
| 10597162 | Klhl18                       | N/A | N/A |

|          |                            |     |     |
|----------|----------------------------|-----|-----|
| 10597173 | Nradd                      | N/A | N/A |
| 10597239 | Pth1r                      | N/A | N/A |
| 10597266 | Als2cl                     | N/A | N/A |
| 10597268 | TdGF1                      | N/A | N/A |
| 10597273 | Rtp3                       | N/A | N/A |
| 10597279 | Ccrl2                      | N/A | N/A |
| 10597288 | Mlh1                       | N/A | N/A |
| 10597309 | Stac                       | N/A | N/A |
| 10597323 | Arpp21                     | N/A | N/A |
| 10597352 | Mir128-2                   | N/A | N/A |
| 10597354 | Pdcd6ip                    | N/A | N/A |
| 10597377 | Fbxl2 /// Ubp1             | N/A | N/A |
| 10597395 | 4921528I07Rik              | N/A | N/A |
| 10597413 | Crtap                      | N/A | N/A |
| 10597420 | Ccr4                       | N/A | N/A |
| 10597427 | Trim71                     | N/A | N/A |
| 10597432 | Cnot10                     | N/A | N/A |
| 10597459 | ---                        | N/A | N/A |
| 10597461 | Cmtm7                      | N/A | N/A |
| 10597470 | Cmtm8                      | N/A | N/A |
| 10597477 | Gpd1l                      | N/A | N/A |
| 10597490 | Rps27 /// Gm9846           | N/A | N/A |
| 10597493 | Stt3b                      | N/A | N/A |
| 10597511 | Gm5921                     | N/A | N/A |
| 10597513 | ---                        | N/A | N/A |
| 10597515 | Rpl24                      | N/A | N/A |
| 10597518 | Tgfb2 /// Mib1             | N/A | N/A |
| 10597531 | Rbms3                      | N/A | N/A |
| 10597554 | Zcwpw2                     | N/A | N/A |
| 10597564 | Cmc1                       | N/A | N/A |
| 10597571 | ---                        | N/A | N/A |
| 10597573 | Eif1                       | N/A | N/A |
| 10597575 | Plcd1                      | N/A | N/A |
| 10597592 | Acaa1b                     | N/A | N/A |
| 10597598 | Slc22a14                   | N/A | N/A |
| 10597612 | Slc22a13                   | N/A | N/A |
| 10597619 | 9330176C04Rik /// Slc22a13 | N/A | N/A |
| 10597627 | Oxsr1                      | N/A | N/A |
| 10597648 | Myd88                      | N/A | N/A |
| 10597656 | Scn5a                      | N/A | N/A |
| 10597686 | Scn10a                     | N/A | N/A |
| 10597714 | Scn11a                     | N/A | N/A |
| 10597743 | Cx3cr1                     | N/A | N/A |
| 10597748 | Gorasp1 /// Wdr48          | N/A | N/A |
| 10597758 | Csrnp1                     | N/A | N/A |
| 10597764 | Xirp1                      | N/A | N/A |
| 10597770 | Gm5922                     | N/A | N/A |
| 10597773 | ---                        | N/A | N/A |
| 10597775 | Ulk4                       | N/A | N/A |
| 10597817 | Cck                        | N/A | N/A |
| 10597823 | Lyzl4                      | N/A | N/A |
| 10597833 | Sec22c                     | N/A | N/A |
| 10597841 | Hhatl                      | N/A | N/A |
| 10597854 | Ccdc13                     | N/A | N/A |
| 10597871 | Higd1a                     | N/A | N/A |
| 10597875 | Cyp8b1                     | N/A | N/A |
| 10597878 | C85492                     | N/A | N/A |
| 10597883 | Ano10                      | N/A | N/A |
| 10597898 | ---                        | N/A | N/A |
| 10597900 | Zfp445                     | N/A | N/A |
| 10597913 | 1110059G10Rik              | N/A | N/A |
| 10597918 | Gm9856                     | N/A | N/A |
| 10597920 | Zdhhc3                     | N/A | N/A |
| 10597933 | ---                        | N/A | N/A |
| 10597935 | Cdcp1                      | N/A | N/A |
| 10597945 | Tmem158                    | N/A | N/A |
| 10597949 | Slc6a20b                   | N/A | N/A |
| 10597960 | Slc6a20a                   | N/A | N/A |
| 10597969 | Hnrnpa1 /// Gm10052        | N/A | N/A |
| 10597973 | Lztf1                      | N/A | N/A |
| 10597978 | Fyco1                      | N/A | N/A |
| 10597996 | Xcr1                       | N/A | N/A |
| 10597999 | ---                        | N/A | N/A |
| 10598004 | Ccr1                       | N/A | N/A |
| 10598010 | Ccr1l1                     | N/A | N/A |
| 10598013 | Ccr5 /// Ccr2              | N/A | N/A |
| 10598018 | ---                        | N/A | N/A |
| 10598020 | ---                        | N/A | N/A |
| 10598023 | ---                        | N/A | N/A |
| 10598025 | ---                        | N/A | N/A |
| 10598027 | ---                        | N/A | N/A |
| 10598029 | ND1                        | N/A | N/A |
| 10598032 | ---                        | N/A | N/A |
| 10598036 | COX1                       | N/A | N/A |

|          |                                                                                                                          |     |     |
|----------|--------------------------------------------------------------------------------------------------------------------------|-----|-----|
| 10598038 | Prf1 /// COX2                                                                                                            | N/A | N/A |
| 10598041 | ---                                                                                                                      | N/A | N/A |
| 10598043 | ATP6 /// Gm10925 /// ATP8 /// COX3                                                                                       | N/A | N/A |
| 10598049 | COX3 /// ND3                                                                                                             | N/A | N/A |
| 10598053 | ---                                                                                                                      | N/A | N/A |
| 10598055 | ND3                                                                                                                      | N/A | N/A |
| 10598057 | ---                                                                                                                      | N/A | N/A |
| 10598059 | ND4L /// ND4                                                                                                             | N/A | N/A |
| 10598062 | ---                                                                                                                      | N/A | N/A |
| 10598064 | ---                                                                                                                      | N/A | N/A |
| 10598067 | ND5                                                                                                                      | N/A | N/A |
| 10598069 | CYTB                                                                                                                     | N/A | N/A |
| 10598071 | ---                                                                                                                      | N/A | N/A |
| 10598073 | ---                                                                                                                      | N/A | N/A |
| 10598075 | ---                                                                                                                      | N/A | N/A |
| 10598077 | ---                                                                                                                      | N/A | N/A |
| 10598079 | ---                                                                                                                      | N/A | N/A |
| 10598081 | ---                                                                                                                      | N/A | N/A |
| 10598083 | LOC100503984 /// LOC100504272                                                                                            | N/A | N/A |
| 10598085 | ---                                                                                                                      | N/A | N/A |
| 10598087 | ND6                                                                                                                      | N/A | N/A |
| 10598089 | ---                                                                                                                      | N/A | N/A |
| 10598091 | ---                                                                                                                      | N/A | N/A |
| 10598093 | Tarm1                                                                                                                    | N/A | N/A |
| 10598101 | Maml2                                                                                                                    | N/A | N/A |
| 10598105 | Olf239                                                                                                                   | N/A | N/A |
| 10598107 | Taf1a                                                                                                                    | N/A | N/A |
| 10598111 | Dhrsx                                                                                                                    | N/A | N/A |
| 10598126 | Hhip12                                                                                                                   | N/A | N/A |
| 10598138 | Spry3                                                                                                                    | N/A | N/A |
| 10598146 | Tcstv3                                                                                                                   | N/A | N/A |
| 10598152 | LOC625360                                                                                                                | N/A | N/A |
| 10598154 | AF067063                                                                                                                 | N/A | N/A |
| 10598164 | 0610010K06Rik                                                                                                            | N/A | N/A |
| 10598169 | 4930449I24Rik /// Gm6370 /// Gm3402 /// Gm3409 /// Gm3415                                                                | N/A | N/A |
| 10598175 | Ear2                                                                                                                     | N/A | N/A |
| 10598178 | Disp1                                                                                                                    | N/A | N/A |
| 10598180 | BC085271                                                                                                                 | N/A | N/A |
| 10598192 | 4930408F14Rik /// Gm2790 /// Gm5923 /// Gm5926 /// Gm2940                                                                | N/A | N/A |
| 10598198 | Mia3                                                                                                                     | N/A | N/A |
| 10598203 | Ccl28                                                                                                                    | N/A | N/A |
| 10598212 | ---                                                                                                                      | N/A | N/A |
| 10598216 | ---                                                                                                                      | N/A | N/A |
| 10598222 | 4930408F14Rik /// Gm2790 /// Gm5923                                                                                      | N/A | N/A |
| 10598227 | 4930408F14Rik /// Gm2790 /// Gm5923 /// Gm5926 /// Gm2940                                                                | N/A | N/A |
| 10598232 | ---                                                                                                                      | N/A | N/A |
| 10598236 | Nudt11                                                                                                                   | N/A | N/A |
| 10598238 | ---                                                                                                                      | N/A | N/A |
| 10598240 | Shroom4                                                                                                                  | N/A | N/A |
| 10598251 | Dgkk                                                                                                                     | N/A | N/A |
| 10598279 | Akap4                                                                                                                    | N/A | N/A |
| 10598287 | LOC100270707                                                                                                             | N/A | N/A |
| 10598289 | 4930524L23Rik                                                                                                            | N/A | N/A |
| 10598292 | Foxp3                                                                                                                    | N/A | N/A |
| 10598309 | Cacna1f                                                                                                                  | N/A | N/A |
| 10598359 | Syp                                                                                                                      | N/A | N/A |
| 10598369 | Prickle3                                                                                                                 | N/A | N/A |
| 10598381 | Gpkow                                                                                                                    | N/A | N/A |
| 10598389 | Wdr45                                                                                                                    | N/A | N/A |
| 10598403 | Praf2                                                                                                                    | N/A | N/A |
| 10598407 | ---                                                                                                                      | N/A | N/A |
| 10598409 | Tcfe3                                                                                                                    | N/A | N/A |
| 10598422 | Gripap1                                                                                                                  | N/A | N/A |
| 10598448 | Kcnd1                                                                                                                    | N/A | N/A |
| 10598467 | Pim2                                                                                                                     | N/A | N/A |
| 10598474 | Slc35a2                                                                                                                  | N/A | N/A |
| 10598482 | Timm17b                                                                                                                  | N/A | N/A |
| 10598491 | Gm10490                                                                                                                  | N/A | N/A |
| 10598493 | Pcsk1n                                                                                                                   | N/A | N/A |
| 10598499 | ---                                                                                                                      | N/A | N/A |
| 10598505 | Rbm3 /// 2900002K06Rik                                                                                                   | N/A | N/A |
| 10598507 | Slc38a5                                                                                                                  | N/A | N/A |
| 10598524 | Ssxb10                                                                                                                   | N/A | N/A |
| 10598528 | Ssxb3 /// Ssxb2 /// Ssxb1 /// Ssx9 /// Ssxb5 /// Ssxb9 /// Ssxb10 /// Ssxb11 /// Ssxb12 /// Ssxb8 /// Gm14459 /// Gm6592 | N/A | N/A |
| 10598538 | Ssxb3                                                                                                                    | N/A | N/A |
| 10598547 | ---                                                                                                                      | N/A | N/A |
| 10598549 | Ssx9                                                                                                                     | N/A | N/A |
| 10598555 | Ssxb5                                                                                                                    | N/A | N/A |
| 10598562 | B630019K06Rik                                                                                                            | N/A | N/A |
| 10598565 | Fthl17 /// Gm5635                                                                                                        | N/A | N/A |
| 10598567 | Fthl17                                                                                                                   | N/A | N/A |
| 10598569 | Gm5635                                                                                                                   | N/A | N/A |
| 10598571 | 4930402K13Rik                                                                                                            | N/A | N/A |
| 10598573 | ---                                                                                                                      | N/A | N/A |

|          |                                                           |     |     |
|----------|-----------------------------------------------------------|-----|-----|
| 10598575 | Lancl3                                                    | N/A | N/A |
| 10598592 | Gm14501 /// Gm14484 /// Gm14483 /// 1700012L04Rik         | N/A | N/A |
| 10598594 | ---                                                       | N/A | N/A |
| 10598596 | Gm14501 /// Gm14484 /// Gm14483 /// 1700012L04Rik         | N/A | N/A |
| 10598598 | 1700054O13Rik                                             | N/A | N/A |
| 10598601 | 4930557A04Rik                                             | N/A | N/A |
| 10598612 | Otc                                                       | N/A | N/A |
| 10598626 | Tspan7                                                    | N/A | N/A |
| 10598636 | Ube21                                                     | N/A | N/A |
| 10598638 | Mid1ip1                                                   | N/A | N/A |
| 10598644 | Gm14501 /// Gm14484 /// Gm14483 /// 1700012L04Rik         | N/A | N/A |
| 10598646 | Gm14501 /// Gm14484 /// Gm14483 /// 1700012L04Rik         | N/A | N/A |
| 10598648 | Gm14501 /// Gm14484 /// Gm14483 /// 1700012L04Rik         | N/A | N/A |
| 10598650 | Gm14501 /// Gm14484 /// Gm14483 /// 1700012L04Rik         | N/A | N/A |
| 10598652 | Gm14501 /// Gm14484 /// Gm14483 /// 1700012L04Rik         | N/A | N/A |
| 10598654 | Gm14501 /// Gm14484 /// Gm14483 /// 1700012L04Rik         | N/A | N/A |
| 10598656 | Gm14501 /// Gm14484 /// Gm14483 /// 1700012L04Rik         | N/A | N/A |
| 10598658 | Gm14501 /// Gm14484 /// Gm14483 /// 1700012L04Rik         | N/A | N/A |
| 10598660 | Gm14501 /// Gm14484 /// Gm14483 /// 1700012L04Rik         | N/A | N/A |
| 10598662 | ---                                                       | N/A | N/A |
| 10598664 | Atp6ap2                                                   | N/A | N/A |
| 10598674 | LOC634012                                                 | N/A | N/A |
| 10598678 | Usp9x                                                     | N/A | N/A |
| 10598721 | Rpl3                                                      | N/A | N/A |
| 10598723 | Ddx3x                                                     | N/A | N/A |
| 10598743 | Nyx                                                       | N/A | N/A |
| 10598750 | Gpr34                                                     | N/A | N/A |
| 10598757 | Gpr82                                                     | N/A | N/A |
| 10598763 | Gm14501 /// Gm14484 /// Gm5382 /// 1700012L04Rik          | N/A | N/A |
| 10598765 | Cypt1 /// Cypt8 /// Cypt7                                 | N/A | N/A |
| 10598769 | ---                                                       | N/A | N/A |
| 10598771 | Maoa                                                      | N/A | N/A |
| 10598789 | ---                                                       | N/A | N/A |
| 10598791 | Gm5073                                                    | N/A | N/A |
| 10598794 | ---                                                       | N/A | N/A |
| 10598796 | Dusp21                                                    | N/A | N/A |
| 10598798 | Kdm6a                                                     | N/A | N/A |
| 10598827 | ---                                                       | N/A | N/A |
| 10598831 | Rpl23a /// Gm10335                                        | N/A | N/A |
| 10598833 | Chst7                                                     | N/A | N/A |
| 10598837 | ---                                                       | N/A | N/A |
| 10598839 | Rp2h                                                      | N/A | N/A |
| 10598848 | Phf16                                                     | N/A | N/A |
| 10598863 | Rgn                                                       | N/A | N/A |
| 10598872 | Rbm10                                                     | N/A | N/A |
| 10598882 | Uba1                                                      | N/A | N/A |
| 10598912 | Cdk16                                                     | N/A | N/A |
| 10598933 | Usp11                                                     | N/A | N/A |
| 10598956 | Araf                                                      | N/A | N/A |
| 10598976 | Timp1                                                     | N/A | N/A |
| 10598983 | Spaca5                                                    | N/A | N/A |
| 10598989 | Sxa1                                                      | N/A | N/A |
| 10598994 | Atp1b3                                                    | N/A | N/A |
| 10598996 | Gm5124                                                    | N/A | N/A |
| 10599001 | Agtr2                                                     | N/A | N/A |
| 10599005 | ---                                                       | N/A | N/A |
| 10599008 | Slc6a14                                                   | N/A | N/A |
| 10599026 | ---                                                       | N/A | N/A |
| 10599028 | 1700023I07Rik                                             | N/A | N/A |
| 10599030 | ---                                                       | N/A | N/A |
| 10599032 | Wdr44                                                     | N/A | N/A |
| 10599054 | Gm4907                                                    | N/A | N/A |
| 10599058 | ---                                                       | N/A | N/A |
| 10599060 | ---                                                       | N/A | N/A |
| 10599062 | ---                                                       | N/A | N/A |
| 10599073 | ---                                                       | N/A | N/A |
| 10599084 | 4930408F14Rik /// Gm2790 /// Gm5923 /// Gm5926 /// Gm2940 | N/A | N/A |
| 10599088 | 4930408F14Rik /// Gm2790 /// Gm5923 /// Gm5926 /// Gm2940 | N/A | N/A |
| 10599094 | ---                                                       | N/A | N/A |
| 10599105 | ---                                                       | N/A | N/A |
| 10599116 | ---                                                       | N/A | N/A |
| 10599118 | ---                                                       | N/A | N/A |
| 10599120 | Dock11                                                    | N/A | N/A |
| 10599174 | Il13ra1                                                   | N/A | N/A |
| 10599187 | Zcchc12                                                   | N/A | N/A |
| 10599192 | Lonrf3                                                    | N/A | N/A |
| 10599200 | Pgrmc1                                                    | N/A | N/A |
| 10599207 | Slc25a43                                                  | N/A | N/A |
| 10599213 | ---                                                       | N/A | N/A |
| 10599215 | Slc25a5                                                   | N/A | N/A |
| 10599222 | Ube2a                                                     | N/A | N/A |
| 10599229 | Ankrd58                                                   | N/A | N/A |
| 10599232 | Nkap                                                      | N/A | N/A |
| 10599243 | Rnf113a1                                                  | N/A | N/A |

|          |                                                                                     |     |     |
|----------|-------------------------------------------------------------------------------------|-----|-----|
| 10599246 | Rhox2a /// Rhox2e /// Rhox2f /// Rhox2c /// Rhox2h /// Rhox2g /// Rhox2b /// Rhox2d | N/A | N/A |
| 10599251 | Rhox3c                                                                              | N/A | N/A |
| 10599263 | Rhox4b                                                                              | N/A | N/A |
| 10599269 | Rhox4b /// Rhox4e /// Rhox4d /// Rhox4a /// Rhox4f /// Rhox4g                       | N/A | N/A |
| 10599274 | Rhox4b /// Rhox4e /// Rhox4a /// Rhox4d /// Rhox4c /// Rhox4g                       | N/A | N/A |
| 10599281 | Rhox4b /// Rhox4e /// Rhox4d /// Rhox4a /// Rhox4g                                  | N/A | N/A |
| 10599286 | Rhox2a                                                                              | N/A | N/A |
| 10599291 | Rhox4b /// Rhox4e /// Rhox4d /// Rhox4a /// Rhox4f /// Rhox4c /// Rhox4g            | N/A | N/A |
| 10599296 | Rhox6                                                                               | N/A | N/A |
| 10599300 | Rhox7                                                                               | N/A | N/A |
| 10599321 | Zbtb33                                                                              | N/A | N/A |
| 10599324 | Atp1b4                                                                              | N/A | N/A |
| 10599333 | Atp5l                                                                               | N/A | N/A |
| 10599335 | Mcts1                                                                               | N/A | N/A |
| 10599342 | 6030498E09Rik                                                                       | N/A | N/A |
| 10599346 | Polr2k                                                                              | N/A | N/A |
| 10599348 | Gria3                                                                               | N/A | N/A |
| 10599369 | Xiap                                                                                | N/A | N/A |
| 10599377 | Stag2                                                                               | N/A | N/A |
| 10599411 | Sh2d1a                                                                              | N/A | N/A |
| 10599416 | Gm10483                                                                             | N/A | N/A |
| 10599418 | ---                                                                                 | N/A | N/A |
| 10599420 | Gm362 /// LOC637093                                                                 | N/A | N/A |
| 10599422 | 1110059M19Rik                                                                       | N/A | N/A |
| 10599425 | Actrt1                                                                              | N/A | N/A |
| 10599427 | ---                                                                                 | N/A | N/A |
| 10599430 | ---                                                                                 | N/A | N/A |
| 10599433 | Rpl121                                                                              | N/A | N/A |
| 10599435 | Ocr1                                                                                | N/A | N/A |
| 10599461 | Calm2                                                                               | N/A | N/A |
| 10599463 | Xpnp2                                                                               | N/A | N/A |
| 10599487 | Sash3                                                                               | N/A | N/A |
| 10599496 | ---                                                                                 | N/A | N/A |
| 10599530 | Rab33a                                                                              | N/A | N/A |
| 10599537 | Slc25a14                                                                            | N/A | N/A |
| 10599554 | Rbmx2                                                                               | N/A | N/A |
| 10599560 | ---                                                                                 | N/A | N/A |
| 10599562 | Arhgap36                                                                            | N/A | N/A |
| 10599576 | Pdpf                                                                                | N/A | N/A |
| 10599579 | Olf1320                                                                             | N/A | N/A |
| 10599581 | 2610018G03Rik                                                                       | N/A | N/A |
| 10599595 | ---                                                                                 | N/A | N/A |
| 10599598 | ---                                                                                 | N/A | N/A |
| 10599604 | Ccdc160                                                                             | N/A | N/A |
| 10599607 | Rps2                                                                                | N/A | N/A |
| 10599612 | Phf6                                                                                | N/A | N/A |
| 10599627 | Hprt                                                                                | N/A | N/A |
| 10599637 | Fam122c                                                                             | N/A | N/A |
| 10599648 | ---                                                                                 | N/A | N/A |
| 10599650 | Etd                                                                                 | N/A | N/A |
| 10599654 | Cxx1c                                                                               | N/A | N/A |
| 10599658 | 4933416I08Rik /// LOC100504039                                                      | N/A | N/A |
| 10599670 | ---                                                                                 | N/A | N/A |
| 10599673 | Slx1 /// Gm16405 /// Gm16430                                                        | N/A | N/A |
| 10599680 | 3830403N18Rik                                                                       | N/A | N/A |
| 10599686 | Zfp449                                                                              | N/A | N/A |
| 10599693 | Ncrna00086                                                                          | N/A | N/A |
| 10599696 | Ddx26b                                                                              | N/A | N/A |
| 10599717 | ---                                                                                 | N/A | N/A |
| 10599719 | Slc9a6                                                                              | N/A | N/A |
| 10599736 | Fhl1                                                                                | N/A | N/A |
| 10599747 | Gpr112                                                                              | N/A | N/A |
| 10599773 | Gpr112                                                                              | N/A | N/A |
| 10599776 | Brs3                                                                                | N/A | N/A |
| 10599781 | Htatsf1                                                                             | N/A | N/A |
| 10599792 | Vgl1                                                                                | N/A | N/A |
| 10599802 | Cd40lg                                                                              | N/A | N/A |
| 10599810 | ---                                                                                 | N/A | N/A |
| 10599812 | Zic3                                                                                | N/A | N/A |
| 10599822 | 4930550L24Rik                                                                       | N/A | N/A |
| 10599826 | F9                                                                                  | N/A | N/A |
| 10599835 | ---                                                                                 | N/A | N/A |
| 10599839 | ---                                                                                 | N/A | N/A |
| 10599841 | C230004F18Rik                                                                       | N/A | N/A |
| 10599849 | Gm4988                                                                              | N/A | N/A |
| 10599853 | Ldoc1                                                                               | N/A | N/A |
| 10599855 | Eif4e                                                                               | N/A | N/A |
| 10599858 | 4933402E13Rik                                                                       | N/A | N/A |
| 10599863 | 4931400O07Rik                                                                       | N/A | N/A |
| 10599866 | 3830417A13Rik                                                                       | N/A | N/A |
| 10599871 | ---                                                                                 | N/A | N/A |
| 10599874 | ---                                                                                 | N/A | N/A |
| 10599876 | Ctag2                                                                               | N/A | N/A |
| 10599880 | Slitrk2                                                                             | N/A | N/A |

|          |                                                           |     |     |
|----------|-----------------------------------------------------------|-----|-----|
| 10599884 | Slitrk2                                                   | N/A | N/A |
| 10599888 | ---                                                       | N/A | N/A |
| 10599893 | Fmr1                                                      | N/A | N/A |
| 10599917 | Fmr1nb                                                    | N/A | N/A |
| 10599925 | Styx                                                      | N/A | N/A |
| 10599927 | Aff2                                                      | N/A | N/A |
| 10599948 | 1700020N15Rik /// Gm6812                                  | N/A | N/A |
| 10599951 | 1110012L19Rik                                             | N/A | N/A |
| 10599956 | ---                                                       | N/A | N/A |
| 10599958 | Gm16441                                                   | N/A | N/A |
| 10599960 | ---                                                       | N/A | N/A |
| 10599962 | Maml1                                                     | N/A | N/A |
| 10599972 | Hnrnpa3                                                   | N/A | N/A |
| 10599976 | Mtm1                                                      | N/A | N/A |
| 10599997 | Mtmr1                                                     | N/A | N/A |
| 10600017 | Hmgb3                                                     | N/A | N/A |
| 10600024 | Gpr50                                                     | N/A | N/A |
| 10600027 | Rpl30                                                     | N/A | N/A |
| 10600034 | Gm1141                                                    | N/A | N/A |
| 10600044 | Prrg3                                                     | N/A | N/A |
| 10600047 | Fate1                                                     | N/A | N/A |
| 10600057 | Cnga2                                                     | N/A | N/A |
| 10600065 | Magea4                                                    | N/A | N/A |
| 10600067 | ---                                                       | N/A | N/A |
| 10600069 | Gabrq                                                     | N/A | N/A |
| 10600080 | Magea9-ps                                                 | N/A | N/A |
| 10600082 | Nsdhl                                                     | N/A | N/A |
| 10600093 | Zfp185                                                    | N/A | N/A |
| 10600114 | Pnma3                                                     | N/A | N/A |
| 10600116 | Gm14685 /// Gm5640 /// DXBay18                            | N/A | N/A |
| 10600122 | Xlr3a /// Xlr3c /// Xlr3b                                 | N/A | N/A |
| 10600131 | Xlr4b /// Xlr4c /// Xlr4a                                 | N/A | N/A |
| 10600144 | F8a                                                       | N/A | N/A |
| 10600148 | Gm14685 /// Gm5640 /// DXBay18                            | N/A | N/A |
| 10600150 | Zfp275                                                    | N/A | N/A |
| 10600159 | Zfp92                                                     | N/A | N/A |
| 10600169 | Bgn                                                       | N/A | N/A |
| 10600180 | Atp2b3                                                    | N/A | N/A |
| 10600205 | Dusp9                                                     | N/A | N/A |
| 10600210 | Slc6a8                                                    | N/A | N/A |
| 10600235 | Abcd1                                                     | N/A | N/A |
| 10600247 | ---                                                       | N/A | N/A |
| 10600249 | Plxnb3                                                    | N/A | N/A |
| 10600284 | Srp3                                                      | N/A | N/A |
| 10600301 | Ssr4                                                      | N/A | N/A |
| 10600308 | ---                                                       | N/A | N/A |
| 10600310 | Avpr2 /// Arhgap4                                         | N/A | N/A |
| 10600317 | Opn1mw                                                    | N/A | N/A |
| 10600324 | Rpl3                                                      | N/A | N/A |
| 10600326 | Tkt1                                                      | N/A | N/A |
| 10600341 | Emd                                                       | N/A | N/A |
| 10600349 | Rpl10                                                     | N/A | N/A |
| 10600355 | Snora70                                                   | N/A | N/A |
| 10600357 | Taz                                                       | N/A | N/A |
| 10600372 | B230340J04Rik                                             | N/A | N/A |
| 10600377 | Atp6ap1                                                   | N/A | N/A |
| 10600390 | Gdi1                                                      | N/A | N/A |
| 10600403 | Fam50a                                                    | N/A | N/A |
| 10600419 | Plxna3                                                    | N/A | N/A |
| 10600453 | lkbkg                                                     | N/A | N/A |
| 10600471 | ---                                                       | N/A | N/A |
| 10600474 | ---                                                       | N/A | N/A |
| 10600476 | ---                                                       | N/A | N/A |
| 10600478 | Olf1325                                                   | N/A | N/A |
| 10600480 | 4930408F14Rik /// Gm2790 /// Gm5923 /// Gm5926 /// Gm2940 | N/A | N/A |
| 10600482 | ---                                                       | N/A | N/A |
| 10600485 | Dkc1                                                      | N/A | N/A |
| 10600500 | 2810453I06Rik                                             | N/A | N/A |
| 10600502 | 2810453I06Rik                                             | N/A | N/A |
| 10600504 | Fundc2                                                    | N/A | N/A |
| 10600512 | Brcc3                                                     | N/A | N/A |
| 10600524 | Vbp1                                                      | N/A | N/A |
| 10600529 | ---                                                       | N/A | N/A |
| 10600531 | ---                                                       | N/A | N/A |
| 10600533 | ---                                                       | N/A | N/A |
| 10600536 | Gm4937                                                    | N/A | N/A |
| 10600539 | Magea7-ps                                                 | N/A | N/A |
| 10600541 | 4930428D18Rik                                             | N/A | N/A |
| 10600547 | Tbl1x                                                     | N/A | N/A |
| 10600566 | ---                                                       | N/A | N/A |
| 10600568 | Gm14744                                                   | N/A | N/A |
| 10600576 | Gm14743 /// Obp1b                                         | N/A | N/A |
| 10600581 | 4930480E11Rik                                             | N/A | N/A |
| 10600584 | ---                                                       | N/A | N/A |

|          |                                 |     |     |
|----------|---------------------------------|-----|-----|
| 10600586 | Fam47a-ps                       | N/A | N/A |
| 10600588 | ---                             | N/A | N/A |
| 10600593 | Hnrnpa3                         | N/A | N/A |
| 10600597 | Tmem47                          | N/A | N/A |
| 10600602 | ---                             | N/A | N/A |
| 10600604 | Dmd                             | N/A | N/A |
| 10600685 | 1600014K23Rik                   | N/A | N/A |
| 10600688 | Tab3                            | N/A | N/A |
| 10600698 | 5430427O19Rik                   | N/A | N/A |
| 10600703 | 1700072E05Rik                   | N/A | N/A |
| 10600710 | ---                             | N/A | N/A |
| 10600712 | ---                             | N/A | N/A |
| 10600714 | Smek3-ps                        | N/A | N/A |
| 10600718 | Sec61g                          | N/A | N/A |
| 10600720 | ---                             | N/A | N/A |
| 10600723 | ---                             | N/A | N/A |
| 10600730 | Gm5072                          | N/A | N/A |
| 10600733 | Gm5072                          | N/A | N/A |
| 10600736 | Mageb17-ps                      | N/A | N/A |
| 10600741 | Gm5941                          | N/A | N/A |
| 10600744 | ---                             | N/A | N/A |
| 10600746 | 1700003E24Rik /// 1700084M14Rik | N/A | N/A |
| 10600750 | 1700003E24Rik /// 1700084M14Rik | N/A | N/A |
| 10600753 | ---                             | N/A | N/A |
| 10600755 | Arx                             | N/A | N/A |
| 10600763 | Gm6985                          | N/A | N/A |
| 10600765 | Pcyt1b                          | N/A | N/A |
| 10600777 | AU015836                        | N/A | N/A |
| 10600781 | Gm4990                          | N/A | N/A |
| 10600786 | Klh15                           | N/A | N/A |
| 10600797 | Apoo /// Apoo-ps                | N/A | N/A |
| 10600810 | ---                             | N/A | N/A |
| 10600814 | Gspt2                           | N/A | N/A |
| 10600819 | Zxda /// Zxdb                   | N/A | N/A |
| 10600821 | ---                             | N/A | N/A |
| 10600823 | LOC675747                       | N/A | N/A |
| 10600825 | Zc3h12b                         | N/A | N/A |
| 10600836 | Msn                             | N/A | N/A |
| 10600852 | Mir223 /// F630028O10Rik        | N/A | N/A |
| 10600857 | Heph                            | N/A | N/A |
| 10600884 | Rpl17 /// Gm10268 /// Rpl17-ps3 | N/A | N/A |
| 10600886 | Gpr165                          | N/A | N/A |
| 10600892 | Pgr15l                          | N/A | N/A |
| 10600899 | ---                             | N/A | N/A |
| 10600901 | Ar                              | N/A | N/A |
| 10600911 | Yipf6                           | N/A | N/A |
| 10600921 | Stard8                          | N/A | N/A |
| 10600936 | Efnb1                           | N/A | N/A |
| 10600947 | Tmem28                          | N/A | N/A |
| 10600953 | Eda                             | N/A | N/A |
| 10600969 | Mir676                          | N/A | N/A |
| 10600971 | Otud6a                          | N/A | N/A |
| 10600973 | Igfbp1                          | N/A | N/A |
| 10600980 | Dgat2l6                         | N/A | N/A |
| 10600988 | Awat1                           | N/A | N/A |
| 10600994 | Arr3                            | N/A | N/A |
| 10601011 | Kif4                            | N/A | N/A |
| 10601044 | Gdpd2                           | N/A | N/A |
| 10601062 | Dlg3                            | N/A | N/A |
| 10601086 | ---                             | N/A | N/A |
| 10601088 | ---                             | N/A | N/A |
| 10601091 | Foxo4                           | N/A | N/A |
| 10601150 | ---                             | N/A | N/A |
| 10601152 | Nlgn3                           | N/A | N/A |
| 10601161 | Gjb1                            | N/A | N/A |
| 10601164 | Nono                            | N/A | N/A |
| 10601178 | Itgb1bp2                        | N/A | N/A |
| 10601192 | Taf1                            | N/A | N/A |
| 10601235 | Ogt                             | N/A | N/A |
| 10601264 | Tpt1 /// Tpt1p                  | N/A | N/A |
| 10601266 | 8030474K03Rik                   | N/A | N/A |
| 10601270 | Gm10456                         | N/A | N/A |
| 10601272 | Pin4                            | N/A | N/A |
| 10601277 | ---                             | N/A | N/A |
| 10601280 | Dmrtc1b                         | N/A | N/A |
| 10601285 | Dmrtc1c /// Dmrtc1c2            | N/A | N/A |
| 10601296 | Pabpc1l2b-ps                    | N/A | N/A |
| 10601298 | Cdx4                            | N/A | N/A |
| 10601303 | Chic1                           | N/A | N/A |
| 10601312 | Chic1                           | N/A | N/A |
| 10601314 | Tsx                             | N/A | N/A |
| 10601322 | ---                             | N/A | N/A |
| 10601326 | Uppt                            | N/A | N/A |
| 10601328 | Uppt                            | N/A | N/A |

|          |                                                                |     |     |
|----------|----------------------------------------------------------------|-----|-----|
| 10601335 | 2610029G23Rik                                                  | N/A | N/A |
| 10601343 | Magee1                                                         | N/A | N/A |
| 10601347 | Cypt2-ps                                                       | N/A | N/A |
| 10601350 | Fgf16                                                          | N/A | N/A |
| 10601354 | ---                                                            | N/A | N/A |
| 10601356 | Cox7b                                                          | N/A | N/A |
| 10601360 | Atp7a                                                          | N/A | N/A |
| 10601385 | Tlr13                                                          | N/A | N/A |
| 10601390 | Pgk1                                                           | N/A | N/A |
| 10601404 | Gm5127                                                         | N/A | N/A |
| 10601412 | Lpar4                                                          | N/A | N/A |
| 10601416 | P2ry10                                                         | N/A | N/A |
| 10601424 | Gpr174                                                         | N/A | N/A |
| 10601430 | 4933401B06Rik                                                  | N/A | N/A |
| 10601433 | Tbx22                                                          | N/A | N/A |
| 10601447 | Fam46d                                                         | N/A | N/A |
| 10601449 | Sh3bgrl                                                        | N/A | N/A |
| 10601456 | Gm6377                                                         | N/A | N/A |
| 10601459 | Pou3f4                                                         | N/A | N/A |
| 10601461 | Cylc1                                                          | N/A | N/A |
| 10601466 | Tex16                                                          | N/A | N/A |
| 10601473 | Apool                                                          | N/A | N/A |
| 10601484 | 2010106E10Rik                                                  | N/A | N/A |
| 10601492 | Zfp711                                                         | N/A | N/A |
| 10601503 | Dach2                                                          | N/A | N/A |
| 10601519 | Klh4                                                           | N/A | N/A |
| 10601531 | Ube2dn1                                                        | N/A | N/A |
| 10601534 | 4930524E20Rik                                                  | N/A | N/A |
| 10601537 | ---                                                            | N/A | N/A |
| 10601539 | ---                                                            | N/A | N/A |
| 10601541 | Cpxcr1                                                         | N/A | N/A |
| 10601547 | ---                                                            | N/A | N/A |
| 10601549 | ---                                                            | N/A | N/A |
| 10601551 | ---                                                            | N/A | N/A |
| 10601553 | Gm14920                                                        | N/A | N/A |
| 10601555 | Tgif2lx1 /// Tgif2lx2                                          | N/A | N/A |
| 10601559 | ---                                                            | N/A | N/A |
| 10601561 | Pabpc5                                                         | N/A | N/A |
| 10601567 | Gapdh /// Gm12070 /// Gm2606 /// Gm4609 /// Gm2451 /// Gm10291 | N/A | N/A |
| 10601569 | Pcdh11x                                                        | N/A | N/A |
| 10601578 | ---                                                            | N/A | N/A |
| 10601581 | 9230105E10Rik /// Trim5                                        | N/A | N/A |
| 10601583 | Mthfd2l                                                        | N/A | N/A |
| 10601585 | ---                                                            | N/A | N/A |
| 10601588 | 3110007F17Rik /// Gm6604                                       | N/A | N/A |
| 10601593 | Gm5167                                                         | N/A | N/A |
| 10601595 | 3110007F17Rik /// Gm6604                                       | N/A | N/A |
| 10601598 | 3110007F17Rik /// Gm6604                                       | N/A | N/A |
| 10601601 | Gm5167                                                         | N/A | N/A |
| 10601603 | Gm382                                                          | N/A | N/A |
| 10601607 | 4921511C20Rik                                                  | N/A | N/A |
| 10601610 | ---                                                            | N/A | N/A |
| 10601612 | Atrn                                                           | N/A | N/A |
| 10601616 | Diap2                                                          | N/A | N/A |
| 10601648 | Tnmd                                                           | N/A | N/A |
| 10601659 | Srpx2                                                          | N/A | N/A |
| 10601673 | Cstf2                                                          | N/A | N/A |
| 10601691 | Arl13a                                                         | N/A | N/A |
| 10601701 | Tmem35                                                         | N/A | N/A |
| 10601729 | Drp2                                                           | N/A | N/A |
| 10601753 | ---                                                            | N/A | N/A |
| 10601755 | Rpl36a                                                         | N/A | N/A |
| 10601760 | Hnrnp2                                                         | N/A | N/A |
| 10601764 | ---                                                            | N/A | N/A |
| 10601768 | Armcx4                                                         | N/A | N/A |
| 10601771 | Armcx1                                                         | N/A | N/A |
| 10601778 | Armcx3                                                         | N/A | N/A |
| 10601786 | Pramel                                                         | N/A | N/A |
| 10601790 | Pramel3 /// Gm5128 /// AV320801                                | N/A | N/A |
| 10601797 | Pramel3 /// Gm5128 /// AV320801                                | N/A | N/A |
| 10601805 | Pramel3 /// Gm5128 /// AV320801                                | N/A | N/A |
| 10601813 | Pramel3 /// Gm5128 /// AV320801                                | N/A | N/A |
| 10601819 | Gprasp1 /// Armcx5                                             | N/A | N/A |
| 10601834 | Gprasp2 /// Gprasp1                                            | N/A | N/A |
| 10601844 | Bhlhb9                                                         | N/A | N/A |
| 10601846 | 2900062L11Rik                                                  | N/A | N/A |
| 10601848 | 6530401D17Rik                                                  | N/A | N/A |
| 10601850 | Bex1 /// Bex4                                                  | N/A | N/A |
| 10601854 | Wbp5                                                           | N/A | N/A |
| 10601857 | Ngfrap1                                                        | N/A | N/A |
| 10601861 | ---                                                            | N/A | N/A |
| 10601863 | ---                                                            | N/A | N/A |
| 10601865 | ---                                                            | N/A | N/A |
| 10601867 | Kir3dl1                                                        | N/A | N/A |



|          |                                |     |     |
|----------|--------------------------------|-----|-----|
| 10601874 | Tceal6 /// Tceal5 /// Tceal3   | N/A | N/A |
| 10601878 | Tceal1                         | N/A | N/A |
| 10601880 | BC065397 /// Morf4l2           | N/A | N/A |
| 10601882 | BC065397                       | N/A | N/A |
| 10601888 | Plp1                           | N/A | N/A |
| 10601901 | 1700014N06Rik                  | N/A | N/A |
| 10601903 | Zcchc18                        | N/A | N/A |
| 10601915 | Fam199x                        | N/A | N/A |
| 10601922 | ---                            | N/A | N/A |
| 10601925 | ---                            | N/A | N/A |
| 10601927 | Il1rapl2                       | N/A | N/A |
| 10601942 | Nrk                            | N/A | N/A |
| 10601973 | 4930513O06Rik                  | N/A | N/A |
| 10601978 | 4933428M09Rik                  | N/A | N/A |
| 10601980 | Mum111                         | N/A | N/A |
| 10601993 | D330045A20Rik                  | N/A | N/A |
| 10602009 | Rnf128                         | N/A | N/A |
| 10602020 | Tbc1d8b                        | N/A | N/A |
| 10602033 | Cldn2                          | N/A | N/A |
| 10602038 | E230019M04Rik                  | N/A | N/A |
| 10602044 | Frmpd3                         | N/A | N/A |
| 10602062 | Prps1                          | N/A | N/A |
| 10602068 | Mid2                           | N/A | N/A |
| 10602081 | Vsig1                          | N/A | N/A |
| 10602090 | Atg4a /// Syt6                 | N/A | N/A |
| 10602105 | Col4a5                         | N/A | N/A |
| 10602164 | Rbbp7                          | N/A | N/A |
| 10602166 | Nxt2                           | N/A | N/A |
| 10602173 | Hnrnpa1 /// Gm10052 /// Gm5643 | N/A | N/A |
| 10602176 | ---                            | N/A | N/A |
| 10602178 | ---                            | N/A | N/A |
| 10602180 | Tmem164                        | N/A | N/A |
| 10602192 | Mir652                         | N/A | N/A |
| 10602196 | Rgag1                          | N/A | N/A |
| 10602198 | Pak3                           | N/A | N/A |
| 10602221 | Mir680-2                       | N/A | N/A |
| 10602223 | Alg13                          | N/A | N/A |
| 10602251 | Gm15070                        | N/A | N/A |
| 10602253 | ---                            | N/A | N/A |
| 10602255 | Zcchc16                        | N/A | N/A |
| 10602258 | ---                            | N/A | N/A |
| 10602261 | Htr2c                          | N/A | N/A |
| 10602269 | Mir448                         | N/A | N/A |
| 10602271 | ---                            | N/A | N/A |
| 10602277 | Gm15107                        | N/A | N/A |
| 10602284 | Gm15107                        | N/A | N/A |
| 10602293 | Gm15107                        | N/A | N/A |
| 10602300 | Gm15107                        | N/A | N/A |
| 10602307 | Gm15107                        | N/A | N/A |
| 10602327 | Gm15107                        | N/A | N/A |
| 10602332 | Gm15107                        | N/A | N/A |
| 10602341 | Gm15107                        | N/A | N/A |
| 10602350 | Gm15107                        | N/A | N/A |
| 10602359 | Gm15107                        | N/A | N/A |
| 10602367 | Gm15107                        | N/A | N/A |
| 10602372 | Alas2                          | N/A | N/A |
| 10602385 | Pfkfb1                         | N/A | N/A |
| 10602401 | Fgd1 /// Tsr2                  | N/A | N/A |
| 10602426 | ---                            | N/A | N/A |
| 10602428 | Wnk3-ps                        | N/A | N/A |
| 10602454 | Fam120c                        | N/A | N/A |
| 10602474 | Phf8                           | N/A | N/A |
| 10602499 | ---                            | N/A | N/A |
| 10602501 | Huwe1                          | N/A | N/A |
| 10602586 | Mirlet7F-2                     | N/A | N/A |
| 10602590 | ---                            | N/A | N/A |
| 10602592 | Hsd17b10                       | N/A | N/A |
| 10602599 | Smc1a                          | N/A | N/A |
| 10602625 | Iqsec2                         | N/A | N/A |
| 10602644 | Kdm5c                          | N/A | N/A |
| 10602675 | ---                            | N/A | N/A |
| 10602677 | Gpr143                         | N/A | N/A |
| 10602688 | Usp51                          | N/A | N/A |
| 10602690 | Foxr2                          | N/A | N/A |
| 10602692 | Rragb                          | N/A | N/A |
| 10602704 | Klf8                           | N/A | N/A |
| 10602716 | Ubqln2                         | N/A | N/A |
| 10602719 | Cypt3                          | N/A | N/A |
| 10602722 | Spin2                          | N/A | N/A |
| 10602725 | 4930542N07Rik                  | N/A | N/A |
| 10602729 | ---                            | N/A | N/A |
| 10602731 | ---                            | N/A | N/A |
| 10602733 | ---                            | N/A | N/A |
| 10602735 | ---                            | N/A | N/A |

|          |                                                           |     |     |
|----------|-----------------------------------------------------------|-----|-----|
| 10602737 | ---                                                       | N/A | N/A |
| 10602739 | Acot9                                                     | N/A | N/A |
| 10602744 | Gm15155                                                   | N/A | N/A |
| 10602749 | 4930503H13Rik                                             | N/A | N/A |
| 10602754 | ---                                                       | N/A | N/A |
| 10602756 | Smpx                                                      | N/A | N/A |
| 10602765 | Klh34                                                     | N/A | N/A |
| 10602770 | ---                                                       | N/A | N/A |
| 10602772 | Rps6ka3                                                   | N/A | N/A |
| 10602795 | Eif1ax                                                    | N/A | N/A |
| 10602805 | Mtap7d2                                                   | N/A | N/A |
| 10602825 | ---                                                       | N/A | N/A |
| 10602827 | A830080D01Rik                                             | N/A | N/A |
| 10602840 | Sh3kbp1                                                   | N/A | N/A |
| 10602865 | Pdha1 /// Map3k15                                         | N/A | N/A |
| 10602893 | ---                                                       | N/A | N/A |
| 10602896 | Gpr64                                                     | N/A | N/A |
| 10602925 | Phka2                                                     | N/A | N/A |
| 10602964 | ---                                                       | N/A | N/A |
| 10602975 | ---                                                       | N/A | N/A |
| 10602977 | Scml2                                                     | N/A | N/A |
| 10603000 | Rai2                                                      | N/A | N/A |
| 10603003 | ---                                                       | N/A | N/A |
| 10603005 | ---                                                       | N/A | N/A |
| 10603009 | Uba52 /// Gm5239 /// Gm7866                               | N/A | N/A |
| 10603011 | Rbbp7                                                     | N/A | N/A |
| 10603023 | ---                                                       | N/A | N/A |
| 10603026 | Ctps2                                                     | N/A | N/A |
| 10603051 | Ap1s2                                                     | N/A | N/A |
| 10603059 | Tmem27                                                    | N/A | N/A |
| 10603066 | Ace2                                                      | N/A | N/A |
| 10603087 | Pir                                                       | N/A | N/A |
| 10603099 | Figf                                                      | N/A | N/A |
| 10603109 | Piga                                                      | N/A | N/A |
| 10603116 | Asb11                                                     | N/A | N/A |
| 10603125 | Asb9                                                      | N/A | N/A |
| 10603135 | Fancb                                                     | N/A | N/A |
| 10603147 | Gemin8                                                    | N/A | N/A |
| 10603151 | Gpm6b                                                     | N/A | N/A |
| 10603166 | Trappc2                                                   | N/A | N/A |
| 10603172 | Rpl7a                                                     | N/A | N/A |
| 10603175 | ---                                                       | N/A | N/A |
| 10603177 | ---                                                       | N/A | N/A |
| 10603180 | Chchd5                                                    | N/A | N/A |
| 10603182 | Arhgap6                                                   | N/A | N/A |
| 10603206 | BC022960                                                  | N/A | N/A |
| 10603208 | Mid1                                                      | N/A | N/A |
| 10603230 | 4930408F14Rik /// Gm2790 /// Gm5923 /// Gm5926 /// Gm2940 | N/A | N/A |
| 10603242 | 4930408F14Rik /// Gm2790 /// Gm5923 /// Gm5926 /// Gm2940 | N/A | N/A |
| 10603245 | ---                                                       | N/A | N/A |
| 10603247 | ---                                                       | N/A | N/A |
| 10603249 | Mycs                                                      | N/A | N/A |
| 10603252 | Larp4                                                     | N/A | N/A |
| 10603254 | Larp4                                                     | N/A | N/A |
| 10603256 | ---                                                       | N/A | N/A |
| 10603262 | AU022751                                                  | N/A | N/A |
| 10603266 | Nudt10                                                    | N/A | N/A |
| 10603270 | Bmp15                                                     | N/A | N/A |
| 10603275 | Ccnb3                                                     | N/A | N/A |
| 10603289 | Ccn5                                                      | N/A | N/A |
| 10603302 | Mir500                                                    | N/A | N/A |
| 10603304 | Mir501                                                    | N/A | N/A |
| 10603306 | Mir362                                                    | N/A | N/A |
| 10603308 | Mir188                                                    | N/A | N/A |
| 10603310 | Mir532                                                    | N/A | N/A |
| 10603312 | Usp27x                                                    | N/A | N/A |
| 10603316 | 2010204K13Rik                                             | N/A | N/A |
| 10603321 | ---                                                       | N/A | N/A |
| 10603323 | Ppp1r3f                                                   | N/A | N/A |
| 10603328 | Ccdc22 /// Foxp3                                          | N/A | N/A |
| 10603346 | Plp2 /// Prickle3                                         | N/A | N/A |
| 10603354 | Magix                                                     | N/A | N/A |
| 10603362 | Ccdc120                                                   | N/A | N/A |
| 10603373 | Pqbp1                                                     | N/A | N/A |
| 10603387 | Hdac6                                                     | N/A | N/A |
| 10603417 | Gata1                                                     | N/A | N/A |
| 10603425 | Glod5                                                     | N/A | N/A |
| 10603431 | Suv39h1                                                   | N/A | N/A |
| 10603440 | Was                                                       | N/A | N/A |
| 10603453 | Wdr13                                                     | N/A | N/A |
| 10603485 | Ebp                                                       | N/A | N/A |
| 10603492 | Porcn                                                     | N/A | N/A |
| 10603508 | Ftsj1                                                     | N/A | N/A |
| 10603525 | Ssxb2 /// Ssxb8                                           | N/A | N/A |

|          |                                                                             |     |     |
|----------|-----------------------------------------------------------------------------|-----|-----|
| 10603533 | Ssxb3                                                                       | N/A | N/A |
| 10603538 | Ssxb3 /// Ssxb2 /// Ssxb1 /// Ssxb9 /// Ssxb10 /// Ssx9                     | N/A | N/A |
| 10603541 | ---                                                                         | N/A | N/A |
| 10603543 | Fthl17 /// Gm5635                                                           | N/A | N/A |
| 10603545 | Fthl17 /// Gm5635                                                           | N/A | N/A |
| 10603547 | ---                                                                         | N/A | N/A |
| 10603549 | LOC280487                                                                   | N/A | N/A |
| 10603551 | Cybb                                                                        | N/A | N/A |
| 10603567 | Dynlt3                                                                      | N/A | N/A |
| 10603573 | Sytl5                                                                       | N/A | N/A |
| 10603583 | Srpx                                                                        | N/A | N/A |
| 10603598 | Rpgr                                                                        | N/A | N/A |
| 10603618 | ---                                                                         | N/A | N/A |
| 10603620 | Gm10489                                                                     | N/A | N/A |
| 10603623 | ---                                                                         | N/A | N/A |
| 10603625 | ---                                                                         | N/A | N/A |
| 10603627 | Bcor                                                                        | N/A | N/A |
| 10603649 | ---                                                                         | N/A | N/A |
| 10603651 | 1810030007Rik                                                               | N/A | N/A |
| 10603659 | Med14                                                                       | N/A | N/A |
| 10603698 | Gm1549                                                                      | N/A | N/A |
| 10603700 | ---                                                                         | N/A | N/A |
| 10603702 | Llph                                                                        | N/A | N/A |
| 10603704 | ---                                                                         | N/A | N/A |
| 10603706 | Med4                                                                        | N/A | N/A |
| 10603708 | Cask                                                                        | N/A | N/A |
| 10603736 | Rnu2                                                                        | N/A | N/A |
| 10603738 | 4930403L05Rik                                                               | N/A | N/A |
| 10603742 | ---                                                                         | N/A | N/A |
| 10603744 | ---                                                                         | N/A | N/A |
| 10603746 | Maob                                                                        | N/A | N/A |
| 10603764 | Ndp                                                                         | N/A | N/A |
| 10603768 | Efhc2                                                                       | N/A | N/A |
| 10603785 | Fundc1                                                                      | N/A | N/A |
| 10603791 | Gm5073                                                                      | N/A | N/A |
| 10603794 | ---                                                                         | N/A | N/A |
| 10603796 | 4930578C19Rik                                                               | N/A | N/A |
| 10603803 | LOC280487                                                                   | N/A | N/A |
| 10603805 | Mir221                                                                      | N/A | N/A |
| 10603807 | Mir222                                                                      | N/A | N/A |
| 10603809 | ---                                                                         | N/A | N/A |
| 10603811 | BC049702                                                                    | N/A | N/A |
| 10603814 | Slc9a7                                                                      | N/A | N/A |
| 10603833 | Usmg5                                                                       | N/A | N/A |
| 10603835 | ---                                                                         | N/A | N/A |
| 10603837 | Ndufb11                                                                     | N/A | N/A |
| 10603841 | ---                                                                         | N/A | N/A |
| 10603843 | Syn1                                                                        | N/A | N/A |
| 10603860 | Cfp                                                                         | N/A | N/A |
| 10603870 | Elk1                                                                        | N/A | N/A |
| 10603878 | Uxt                                                                         | N/A | N/A |
| 10603881 | Zfp182                                                                      | N/A | N/A |
| 10603887 | Zfp300                                                                      | N/A | N/A |
| 10603894 | ---                                                                         | N/A | N/A |
| 10603896 | Klhl13                                                                      | N/A | N/A |
| 10603909 | ---                                                                         | N/A | N/A |
| 10603911 | ---                                                                         | N/A | N/A |
| 10603962 | ---                                                                         | N/A | N/A |
| 10603973 | ---                                                                         | N/A | N/A |
| 10603984 | ---                                                                         | N/A | N/A |
| 10603995 | ---                                                                         | N/A | N/A |
| 10604006 | ---                                                                         | N/A | N/A |
| 10604017 | ---                                                                         | N/A | N/A |
| 10604019 | 1810037117Rik                                                               | N/A | N/A |
| 10604021 | ---                                                                         | N/A | N/A |
| 10604032 | ---                                                                         | N/A | N/A |
| 10604036 | ---                                                                         | N/A | N/A |
| 10604038 | Akap17b                                                                     | N/A | N/A |
| 10604046 | C330007P06Rik                                                               | N/A | N/A |
| 10604053 | Nkrf                                                                        | N/A | N/A |
| 10604057 | Sep06                                                                       | N/A | N/A |
| 10604072 | Rpl39                                                                       | N/A | N/A |
| 10604076 | Snora69                                                                     | N/A | N/A |
| 10604078 | Upf3b                                                                       | N/A | N/A |
| 10604094 | Akap14                                                                      | N/A | N/A |
| 10604100 | Ndufa1                                                                      | N/A | N/A |
| 10604106 | Gm9                                                                         | N/A | N/A |
| 10604111 | Rhox1                                                                       | N/A | N/A |
| 10604119 | Rhox4b                                                                      | N/A | N/A |
| 10604124 | Rhox4b                                                                      | N/A | N/A |
| 10604129 | Rhox3c /// Rhox3g-ps /// Rhox3f /// Rhox3a /// Rhox3b /// Rhox3h /// Rhox3e | N/A | N/A |
| 10604143 | Gm6310                                                                      | N/A | N/A |
| 10604148 | Rhox8                                                                       | N/A | N/A |
| 10604154 | Rhox9                                                                       | N/A | N/A |

|          |                                 |     |     |
|----------|---------------------------------|-----|-----|
| 10604157 | 4930525M21Rik                   | N/A | N/A |
| 10604159 | 4930430D24Rik                   | N/A | N/A |
| 10604165 | Rhox11                          | N/A | N/A |
| 10604169 | Rhox12                          | N/A | N/A |
| 10604175 | Fam70a                          | N/A | N/A |
| 10604187 | Lamp2                           | N/A | N/A |
| 10604199 | Cul4b                           | N/A | N/A |
| 10604226 | C1galt1c1                       | N/A | N/A |
| 10604230 | Ap3s1                           | N/A | N/A |
| 10604232 | ---                             | N/A | N/A |
| 10604234 | ---                             | N/A | N/A |
| 10604236 | ---                             | N/A | N/A |
| 10604240 | Rpl17 /// Gm10268 /// Rpl17-ps3 | N/A | N/A |
| 10604242 | ---                             | N/A | N/A |
| 10604245 | ---                             | N/A | N/A |
| 10604248 | Thoc2                           | N/A | N/A |
| 10604290 | ---                             | N/A | N/A |
| 10604292 | Odz1                            | N/A | N/A |
| 10604327 | Dcaf12l2                        | N/A | N/A |
| 10604333 | Dcaf12l1                        | N/A | N/A |
| 10604337 | ---                             | N/A | N/A |
| 10604340 | ---                             | N/A | N/A |
| 10604342 | Gm4987                          | N/A | N/A |
| 10604344 | ---                             | N/A | N/A |
| 10604347 | Smarca1                         | N/A | N/A |
| 10604375 | Apln                            | N/A | N/A |
| 10604380 | Zdhhc9                          | N/A | N/A |
| 10604393 | Elf4                            | N/A | N/A |
| 10604403 | Elf4                            | N/A | N/A |
| 10604405 | Aifm1                           | N/A | N/A |
| 10604424 | Zfp280c                         | N/A | N/A |
| 10604447 | Gpr119                          | N/A | N/A |
| 10604449 | ---                             | N/A | N/A |
| 10604451 | Enox2                           | N/A | N/A |
| 10604470 | Olf1321                         | N/A | N/A |
| 10604473 | Igsf1                           | N/A | N/A |
| 10604497 | Olf1322                         | N/A | N/A |
| 10604499 | Olf1323                         | N/A | N/A |
| 10604501 | Hnrnpf                          | N/A | N/A |
| 10604503 | Olf1324                         | N/A | N/A |
| 10604505 | 6720401G13Rik                   | N/A | N/A |
| 10604508 | Frdm7                           | N/A | N/A |
| 10604523 | Rap2c                           | N/A | N/A |
| 10604528 | Mbnl3                           | N/A | N/A |
| 10604542 | Hs6st2                          | N/A | N/A |
| 10604551 | Usp26                           | N/A | N/A |
| 10604557 | 1700080O16Rik                   | N/A | N/A |
| 10604564 | Gpc4                            | N/A | N/A |
| 10604576 | Gpc3                            | N/A | N/A |
| 10604585 | Mir717                          | N/A | N/A |
| 10604587 | Mir363                          | N/A | N/A |
| 10604589 | Mir92-2                         | N/A | N/A |
| 10604593 | Mir20b                          | N/A | N/A |
| 10604597 | Rps17 /// Gm6402 /// Gm12034    | N/A | N/A |
| 10604599 | ---                             | N/A | N/A |
| 10604602 | Mir450b                         | N/A | N/A |
| 10604604 | Mir450-1                        | N/A | N/A |
| 10604606 | Mir450-2                        | N/A | N/A |
| 10604608 | Mir542                          | N/A | N/A |
| 10604610 | Mir351                          | N/A | N/A |
| 10604612 | Mir503                          | N/A | N/A |
| 10604614 | Mir322                          | N/A | N/A |
| 10604616 | Plac1                           | N/A | N/A |
| 10604620 | Fam122b                         | N/A | N/A |
| 10604630 | Mospd1                          | N/A | N/A |
| 10604633 | Cxx1a /// Cxx1b /// Cxx1c       | N/A | N/A |
| 10604637 | Cxx1a /// Cxx1b /// Cxx1c       | N/A | N/A |
| 10604641 | ---                             | N/A | N/A |
| 10604643 | 1700013H16Rik                   | N/A | N/A |
| 10604653 | Zfp36l3                         | N/A | N/A |
| 10604656 | Xlr                             | N/A | N/A |
| 10604661 | ---                             | N/A | N/A |
| 10604665 | ---                             | N/A | N/A |
| 10604669 | ---                             | N/A | N/A |
| 10604671 | ---                             | N/A | N/A |
| 10604674 | Gm773                           | N/A | N/A |
| 10604682 | Gm648                           | N/A | N/A |
| 10604687 | Mmgt1                           | N/A | N/A |
| 10604694 | Mtap7d3                         | N/A | N/A |
| 10604713 | Arhgef6                         | N/A | N/A |
| 10604735 | Rbmx                            | N/A | N/A |
| 10604743 | Snord61                         | N/A | N/A |
| 10604745 | Gpr101                          | N/A | N/A |
| 10604749 | ---                             | N/A | N/A |

|          |                                                           |     |     |
|----------|-----------------------------------------------------------|-----|-----|
| 10604751 | Fgf13                                                     | N/A | N/A |
| 10604761 | Mir504                                                    | N/A | N/A |
| 10604763 | Arpc1b                                                    | N/A | N/A |
| 10604765 | Mcf2                                                      | N/A | N/A |
| 10604799 | Atp11c                                                    | N/A | N/A |
| 10604832 | Mir505                                                    | N/A | N/A |
| 10604834 | ---                                                       | N/A | N/A |
| 10604837 | Sox3                                                      | N/A | N/A |
| 10604840 | ---                                                       | N/A | N/A |
| 10604842 | ---                                                       | N/A | N/A |
| 10604844 | Sms /// Gm8234                                            | N/A | N/A |
| 10604846 | ---                                                       | N/A | N/A |
| 10604850 | ---                                                       | N/A | N/A |
| 10604853 | Slitrk4                                                   | N/A | N/A |
| 10604859 | ---                                                       | N/A | N/A |
| 10604861 | ---                                                       | N/A | N/A |
| 10604864 | 4930447F04Rik                                             | N/A | N/A |
| 10604867 | Mir471                                                    | N/A | N/A |
| 10604869 | Mir463                                                    | N/A | N/A |
| 10604871 | Mir470                                                    | N/A | N/A |
| 10604873 | Mir465b-1 /// Mir465b-2 /// Mir465c-1 /// Mir465c-2       | N/A | N/A |
| 10604875 | Mir465b-1 /// Mir465b-2 /// Mir465c-1 /// Mir465c-2       | N/A | N/A |
| 10604877 | Mir465                                                    | N/A | N/A |
| 10604879 | ---                                                       | N/A | N/A |
| 10604882 | ---                                                       | N/A | N/A |
| 10604885 | 4933436I01Rik                                             | N/A | N/A |
| 10604889 | Mir201                                                    | N/A | N/A |
| 10604891 | Mir547                                                    | N/A | N/A |
| 10604893 | Gm4910                                                    | N/A | N/A |
| 10604895 | Gm10474                                                   | N/A | N/A |
| 10604897 | ---                                                       | N/A | N/A |
| 10604899 | 1700020N15Rik /// Gm6812                                  | N/A | N/A |
| 10604902 | ---                                                       | N/A | N/A |
| 10604904 | Rps6 /// Gm16409                                          | N/A | N/A |
| 10604906 | Ids                                                       | N/A | N/A |
| 10604918 | 4930567H17Rik                                             | N/A | N/A |
| 10604922 | BC023829                                                  | N/A | N/A |
| 10604930 | ---                                                       | N/A | N/A |
| 10604932 | Cd9912                                                    | N/A | N/A |
| 10604944 | Gabre                                                     | N/A | N/A |
| 10604954 | Mir224                                                    | N/A | N/A |
| 10604956 | Mir452                                                    | N/A | N/A |
| 10604958 | Magea10                                                   | N/A | N/A |
| 10604961 | Gabra3                                                    | N/A | N/A |
| 10604974 | Cetn2                                                     | N/A | N/A |
| 10604982 | Pnma5                                                     | N/A | N/A |
| 10604984 | Xlr4a /// Xlr4b /// Xlr4c                                 | N/A | N/A |
| 10604996 | Xlr3c                                                     | N/A | N/A |
| 10605007 | Xlr3c                                                     | N/A | N/A |
| 10605018 | Xlr5c /// Xlr5a /// Xlr5b                                 | N/A | N/A |
| 10605028 | Gm14685 /// Gm5640 /// DXBay18                            | N/A | N/A |
| 10605034 | Xlr4a /// Xlr4b /// Xlr4c                                 | N/A | N/A |
| 10605044 | Xlr5c /// Xlr5a /// Xlr5b                                 | N/A | N/A |
| 10605051 | Trex2                                                     | N/A | N/A |
| 10605055 | Haus7                                                     | N/A | N/A |
| 10605067 | Pnck                                                      | N/A | N/A |
| 10605081 | Bcap31                                                    | N/A | N/A |
| 10605090 | Idh3g                                                     | N/A | N/A |
| 10605104 | Pdzd4                                                     | N/A | N/A |
| 10605113 | L1cam                                                     | N/A | N/A |
| 10605143 | Arhgap4                                                   | N/A | N/A |
| 10605172 | Arhgap4                                                   | N/A | N/A |
| 10605181 | Renbp                                                     | N/A | N/A |
| 10605195 | Hcfc1                                                     | N/A | N/A |
| 10605222 | Irak1 /// Mir718                                          | N/A | N/A |
| 10605247 | Mecp2                                                     | N/A | N/A |
| 10605252 | Tex28                                                     | N/A | N/A |
| 10605256 | Flna                                                      | N/A | N/A |
| 10605303 | Dnase1l1                                                  | N/A | N/A |
| 10605315 | Lage3                                                     | N/A | N/A |
| 10605319 | Slc10a3-ubl4 /// Ubl4                                     | N/A | N/A |
| 10605324 | Slc10a3-ubl4 /// Slc10a3                                  | N/A | N/A |
| 10605328 | Fam3a                                                     | N/A | N/A |
| 10605338 | G6pdx                                                     | N/A | N/A |
| 10605349 | Ube2d3                                                    | N/A | N/A |
| 10605351 | ---                                                       | N/A | N/A |
| 10605353 | 4930408F14Rik /// Gm2790 /// Gm5923 /// Gm5926 /// Gm2940 | N/A | N/A |
| 10605355 | ---                                                       | N/A | N/A |
| 10605357 | Gab3                                                      | N/A | N/A |
| 10605370 | Mpp1                                                      | N/A | N/A |
| 10605386 | 4930428E23Rik                                             | N/A | N/A |
| 10605392 | F8                                                        | N/A | N/A |
| 10605421 | Mtcp1                                                     | N/A | N/A |
| 10605429 | ---                                                       | N/A | N/A |

|          |                         |     |     |
|----------|-------------------------|-----|-----|
| 10605431 | Rab39b                  | N/A | N/A |
| 10605455 | ---                     | N/A | N/A |
| 10605457 | Gm5793                  | N/A | N/A |
| 10605459 | Gm6927                  | N/A | N/A |
| 10605461 | ---                     | N/A | N/A |
| 10605465 | Prkx                    | N/A | N/A |
| 10605475 | Pbsn                    | N/A | N/A |
| 10605482 | Gm14744                 | N/A | N/A |
| 10605488 | Obp1a                   | N/A | N/A |
| 10605493 | Prrg1                   | N/A | N/A |
| 10605499 | 3426406K10Rik           | N/A | N/A |
| 10605501 | ---                     | N/A | N/A |
| 10605503 | ---                     | N/A | N/A |
| 10605505 | ---                     | N/A | N/A |
| 10605507 | Zc3h18                  | N/A | N/A |
| 10605510 | ---                     | N/A | N/A |
| 10605512 | ---                     | N/A | N/A |
| 10605522 | Gm7173                  | N/A | N/A |
| 10605542 | Mageb16 /// Mageb16-ps1 | N/A | N/A |
| 10605552 | ---                     | N/A | N/A |
| 10605554 | Gapdh                   | N/A | N/A |
| 10605559 | ---                     | N/A | N/A |
| 10605561 | 4930595M18Rik           | N/A | N/A |
| 10605566 | ---                     | N/A | N/A |
| 10605568 | Tsga8                   | N/A | N/A |
| 10605571 | Gyk                     | N/A | N/A |
| 10605598 | Mageb4                  | N/A | N/A |
| 10605603 | Mageb4                  | N/A | N/A |
| 10605606 | Gm41                    | N/A | N/A |
| 10605612 | ---                     | N/A | N/A |
| 10605614 | ---                     | N/A | N/A |
| 10605616 | Il1rap1                 | N/A | N/A |
| 10605629 | ---                     | N/A | N/A |
| 10605631 | ---                     | N/A | N/A |
| 10605633 | Pet2                    | N/A | N/A |
| 10605644 | ---                     | N/A | N/A |
| 10605648 | 4930415L06Rik           | N/A | N/A |
| 10605651 | ---                     | N/A | N/A |
| 10605654 | Mageb5                  | N/A | N/A |
| 10605659 | ---                     | N/A | N/A |
| 10605662 | Gm5072                  | N/A | N/A |
| 10605666 | Mageb18                 | N/A | N/A |
| 10605674 | Pola1                   | N/A | N/A |
| 10605711 | Pdk3                    | N/A | N/A |
| 10605726 | ---                     | N/A | N/A |
| 10605729 | Zfx                     | N/A | N/A |
| 10605740 | Eif2s3x                 | N/A | N/A |
| 10605753 | 4932442L08Rik           | N/A | N/A |
| 10605766 | Maged1                  | N/A | N/A |
| 10605782 | ---                     | N/A | N/A |
| 10605784 | Gm7061                  | N/A | N/A |
| 10605786 | Gm7061                  | N/A | N/A |
| 10605788 | Zxda /// Zxdb           | N/A | N/A |
| 10605790 | ---                     | N/A | N/A |
| 10605792 | Spin4                   | N/A | N/A |
| 10605797 | Arhgef9                 | N/A | N/A |
| 10605811 | Fam123b                 | N/A | N/A |
| 10605815 | Asb12                   | N/A | N/A |
| 10605820 | Zc4h2                   | N/A | N/A |
| 10605828 | 1700010D01Rik           | N/A | N/A |
| 10605831 | Las1l                   | N/A | N/A |
| 10605848 | Vsig4                   | N/A | N/A |
| 10605855 | Hsf3                    | N/A | N/A |
| 10605871 | Gm9059                  | N/A | N/A |
| 10605874 | Eda2r                   | N/A | N/A |
| 10605884 | Ophn1                   | N/A | N/A |
| 10605914 | ---                     | N/A | N/A |
| 10605917 | Gm14812                 | N/A | N/A |
| 10605919 | Pja1                    | N/A | N/A |
| 10605929 | Awat2                   | N/A | N/A |
| 10605938 | P2ry4                   | N/A | N/A |
| 10605943 | Pdzd11 /// Kif4         | N/A | N/A |
| 10605952 | Gdgd2                   | N/A | N/A |
| 10605954 | Tex11                   | N/A | N/A |
| 10605986 | Slc7a3                  | N/A | N/A |
| 10605999 | ---                     | N/A | N/A |
| 10606001 | Snx12                   | N/A | N/A |
| 10606009 | Gm614                   | N/A | N/A |
| 10606016 | Il2rg                   | N/A | N/A |
| 10606026 | Zmym3                   | N/A | N/A |
| 10606056 | 2610030H06Rik           | N/A | N/A |
| 10606058 | Cxcr3                   | N/A | N/A |
| 10606060 | ---                     | N/A | N/A |
| 10606064 | Rgag4                   | N/A | N/A |

|          |                                                  |     |     |
|----------|--------------------------------------------------|-----|-----|
| 10606069 | 4930444G20Rik /// AF366264 /// Gm4831 /// Gm9839 | N/A | N/A |
| 10606071 | Eccc6l                                           | N/A | N/A |
| 10606075 | Rps4x                                            | N/A | N/A |
| 10606083 | Cited1                                           | N/A | N/A |
| 10606088 | Hdac8                                            | N/A | N/A |
| 10606102 | Phka1                                            | N/A | N/A |
| 10606138 | Dmrtc1c /// Dmrtc1c2                             | N/A | N/A |
| 10606146 | 1700031F05Rik                                    | N/A | N/A |
| 10606149 | Dmrtc1a                                          | N/A | N/A |
| 10606158 | Pabpc1l2b-ps                                     | N/A | N/A |
| 10606160 | Rfwd2                                            | N/A | N/A |
| 10606163 | 4930519F16Rik                                    | N/A | N/A |
| 10606174 | Nap1l2                                           | N/A | N/A |
| 10606178 | Xist                                             | N/A | N/A |
| 10606180 | Gm9785                                           | N/A | N/A |
| 10606182 | Mir421                                           | N/A | N/A |
| 10606184 | Mir374                                           | N/A | N/A |
| 10606186 | Slc16a2                                          | N/A | N/A |
| 10606195 | Rlim                                             | N/A | N/A |
| 10606206 | C77370                                           | N/A | N/A |
| 10606215 | Mir672                                           | N/A | N/A |
| 10606217 | Abcb7                                            | N/A | N/A |
| 10606235 | Zdhhc15                                          | N/A | N/A |
| 10606248 | Magee2                                           | N/A | N/A |
| 10606252 | ---                                              | N/A | N/A |
| 10606255 | Rpl30                                            | N/A | N/A |
| 10606259 | Mir325                                           | N/A | N/A |
| 10606261 | Rpl12 /// Rpl12-ps1                              | N/A | N/A |
| 10606263 | Atrx                                             | N/A | N/A |
| 10606301 | Magt1                                            | N/A | N/A |
| 10606315 | Taf9b                                            | N/A | N/A |
| 10606323 | Fnd3c2                                           | N/A | N/A |
| 10606355 | Cysltr1                                          | N/A | N/A |
| 10606362 | ---                                              | N/A | N/A |
| 10606364 | ---                                              | N/A | N/A |
| 10606366 | Zcchc5                                           | N/A | N/A |
| 10606369 | Itm2a                                            | N/A | N/A |
| 10606376 | 2610002M06Rik                                    | N/A | N/A |
| 10606386 | Gm732                                            | N/A | N/A |
| 10606389 | ---                                              | N/A | N/A |
| 10606391 | Gm10452                                          | N/A | N/A |
| 10606393 | Brwd3                                            | N/A | N/A |
| 10606436 | Hmgn5                                            | N/A | N/A |
| 10606439 | ---                                              | N/A | N/A |
| 10606441 | ---                                              | N/A | N/A |
| 10606443 | ---                                              | N/A | N/A |
| 10606445 | Rps6ka6                                          | N/A | N/A |
| 10606473 | Gm9927 /// Hdx                                   | N/A | N/A |
| 10606475 | Hdx                                              | N/A | N/A |
| 10606488 | Sat1                                             | N/A | N/A |
| 10606495 | Pof1b                                            | N/A | N/A |
| 10606513 | Chm                                              | N/A | N/A |
| 10606530 | Mir361                                           | N/A | N/A |
| 10606535 | ---                                              | N/A | N/A |
| 10606538 | Rpl30 /// Gm12191 /// Gm6570 /// Gm6109          | N/A | N/A |
| 10606540 | ---                                              | N/A | N/A |
| 10606542 | ---                                              | N/A | N/A |
| 10606544 | ---                                              | N/A | N/A |
| 10606548 | Tgif2lx1 /// Tgif2lx2                            | N/A | N/A |
| 10606552 | Gm14920                                          | N/A | N/A |
| 10606554 | Nap1l3                                           | N/A | N/A |
| 10606559 | Vmn2r121                                         | N/A | N/A |
| 10606565 | Gm10063                                          | N/A | N/A |
| 10606567 | Rps12 /// Gm10063 /// Rps12-ps2                  | N/A | N/A |
| 10606569 | Rps12 /// Gm10063 /// Rps12-ps2                  | N/A | N/A |
| 10606571 | Gm10063                                          | N/A | N/A |
| 10606575 | Gm10063                                          | N/A | N/A |
| 10606577 | Rps12 /// Gm10063 /// Rps12-ps2                  | N/A | N/A |
| 10606579 | Rps12 /// Gm10063 /// Rps12-ps2                  | N/A | N/A |
| 10606581 | Rps12 /// Gm10063 /// Rps12-ps2                  | N/A | N/A |
| 10606583 | 4932411N23Rik                                    | N/A | N/A |
| 10606589 | 4930412D23Rik                                    | N/A | N/A |
| 10606592 | ---                                              | N/A | N/A |
| 10606595 | ---                                              | N/A | N/A |
| 10606600 | Pcdh19                                           | N/A | N/A |
| 10606609 | Tspan6                                           | N/A | N/A |
| 10606619 | Syt14                                            | N/A | N/A |
| 10606640 | Nox1                                             | N/A | N/A |
| 10606654 | Xkrx                                             | N/A | N/A |
| 10606658 | Trmt2b                                           | N/A | N/A |
| 10606674 | Taf7l                                            | N/A | N/A |
| 10606689 | Timm8a1                                          | N/A | N/A |
| 10606694 | Btk                                              | N/A | N/A |
| 10606714 | Gla                                              | N/A | N/A |

|          |                                   |     |     |
|----------|-----------------------------------|-----|-----|
| 10606725 | ---                               | N/A | N/A |
| 10606728 | Gm10344                           | N/A | N/A |
| 10606730 | Armcx6                            | N/A | N/A |
| 10606735 | Armcx2                            | N/A | N/A |
| 10606744 | Rps2 /// Rps2-ps6                 | N/A | N/A |
| 10606746 | Nxf2                              | N/A | N/A |
| 10606770 | Zmat1                             | N/A | N/A |
| 10606783 | Pramet3 /// Gm5128 /// AV320801   | N/A | N/A |
| 10606789 | Tceal6                            | N/A | N/A |
| 10606792 | Nxf7                              | N/A | N/A |
| 10606816 | Prame                             | N/A | N/A |
| 10606820 | 170008105Rik                      | N/A | N/A |
| 10606831 | Tmsb15a                           | N/A | N/A |
| 10606835 | Bex2                              | N/A | N/A |
| 10606837 | Nxf3                              | N/A | N/A |
| 10606858 | Tceal8                            | N/A | N/A |
| 10606864 | Tceal5                            | N/A | N/A |
| 10606868 | Bex1                              | N/A | N/A |
| 10606870 | Kir3dl2                           | N/A | N/A |
| 10606876 | Morf4l2                           | N/A | N/A |
| 10606880 | Glra4                             | N/A | N/A |
| 10606893 | Rab9b                             | N/A | N/A |
| 10606902 | Tmsb15l /// Tmsb15b2 /// Tmsb15b1 | N/A | N/A |
| 10606910 | Mcart6                            | N/A | N/A |
| 10606912 | ---                               | N/A | N/A |
| 10606914 | Esx1                              | N/A | N/A |
| 10606924 | ---                               | N/A | N/A |
| 10606926 | Tex13a                            | N/A | N/A |
| 10606928 | Serpina7                          | N/A | N/A |
| 10606936 | ---                               | N/A | N/A |
| 10606939 | Rps4x                             | N/A | N/A |
| 10606941 | Ripply1                           | N/A | N/A |
| 10606948 | Morc4                             | N/A | N/A |
| 10606969 | Rbm41                             | N/A | N/A |
| 10606979 | Nup62cl                           | N/A | N/A |
| 10606989 | Tsc22d3                           | N/A | N/A |
| 10606997 | Tex13                             | N/A | N/A |
| 10607002 | ---                               | N/A | N/A |
| 10607004 | Psm10                             | N/A | N/A |
| 10607012 | Col4a6                            | N/A | N/A |
| 10607059 | Irs4                              | N/A | N/A |
| 10607064 | Gucy2f                            | N/A | N/A |
| 10607085 | Kcne1l                            | N/A | N/A |
| 10607089 | Acsi4                             | N/A | N/A |
| 10607111 | ---                               | N/A | N/A |
| 10607113 | Rgs3                              | N/A | N/A |
| 10607116 | Ammecr1                           | N/A | N/A |
| 10607124 | Chrdl1                            | N/A | N/A |
| 10607143 | Capn6                             | N/A | N/A |
| 10607156 | Dcx                               | N/A | N/A |
| 10607169 | Trpc5                             | N/A | N/A |
| 10607183 | Lhfpl1                            | N/A | N/A |
| 10607189 | Amot                              | N/A | N/A |
| 10607202 | ---                               | N/A | N/A |
| 10607204 | Gm8261                            | N/A | N/A |
| 10607206 | Il13ra2                           | N/A | N/A |
| 10607222 | Vmn1r41 /// Vmn1r239-ps           | N/A | N/A |
| 10607225 | Lrch2                             | N/A | N/A |
| 10607244 | ---                               | N/A | N/A |
| 10607246 | Tmem29                            | N/A | N/A |
| 10607250 | Apex2                             | N/A | N/A |
| 10607259 | Tro                               | N/A | N/A |
| 10607280 | ---                               | N/A | N/A |
| 10607283 | Maged2 /// LOC675577              | N/A | N/A |
| 10607302 | Gnl3l                             | N/A | N/A |
| 10607317 | Tsr2                              | N/A | N/A |
| 10607324 | Rpl21                             | N/A | N/A |
| 10607328 | ---                               | N/A | N/A |
| 10607330 | Fam120c /// A230072E10Rik         | N/A | N/A |
| 10607332 | ---                               | N/A | N/A |
| 10607334 | ---                               | N/A | N/A |
| 10607336 | Ribc1                             | N/A | N/A |
| 10607346 | Tspyl2                            | N/A | N/A |
| 10607356 | Gpr173                            | N/A | N/A |
| 10607361 | ---                               | N/A | N/A |
| 10607363 | ---                               | N/A | N/A |
| 10607366 | Shroom2                           | N/A | N/A |
| 10607388 | Rpl7a /// Gm16477                 | N/A | N/A |
| 10607391 | Rps7 /// Gm9493                   | N/A | N/A |
| 10607393 | ---                               | N/A | N/A |
| 10607395 | Mageh1                            | N/A | N/A |
| 10607398 | ---                               | N/A | N/A |
| 10607401 | ---                               | N/A | N/A |
| 10607403 | Kctd12b                           | N/A | N/A |



|          |                                                               |     |     |
|----------|---------------------------------------------------------------|-----|-----|
| 10607407 | ---                                                           | N/A | N/A |
| 10607409 | Gm15144 /// Gm5646 /// Gm15140                                | N/A | N/A |
| 10607412 | Gm15144 /// Gm5646 /// Gm15140                                | N/A | N/A |
| 10607415 | Gm15144 /// Gm15140                                           | N/A | N/A |
| 10607419 | ---                                                           | N/A | N/A |
| 10607421 | 4930524N10Rik                                                 | N/A | N/A |
| 10607425 | Gm5647 /// 4930524N10Rik                                      | N/A | N/A |
| 10607429 | LOC280487                                                     | N/A | N/A |
| 10607431 | Magea6                                                        | N/A | N/A |
| 10607433 | Magea3                                                        | N/A | N/A |
| 10607437 | Magea3 /// Magea8                                             | N/A | N/A |
| 10607443 | Magea2 /// Magea6 /// Magea5 /// Magea1 /// Magea3 /// Magea8 | N/A | N/A |
| 10607450 | Magea5                                                        | N/A | N/A |
| 10607454 | Magea2 /// Magea6 /// Magea5 /// Magea1 /// Magea3 /// Magea8 | N/A | N/A |
| 10607459 | 1700042B14Rik                                                 | N/A | N/A |
| 10607465 | Gm4997                                                        | N/A | N/A |
| 10607467 | Sat1                                                          | N/A | N/A |
| 10607473 | ---                                                           | N/A | N/A |
| 10607475 | Prdx4                                                         | N/A | N/A |
| 10607484 | Ptchd1                                                        | N/A | N/A |
| 10607486 | Ptchd1                                                        | N/A | N/A |
| 10607493 | ---                                                           | N/A | N/A |
| 10607495 | ---                                                           | N/A | N/A |
| 10607497 | Suclg2                                                        | N/A | N/A |
| 10607499 | Phex                                                          | N/A | N/A |
| 10607524 | Sms /// Gm8234                                                | N/A | N/A |
| 10607539 | Mbtps2 /// Yy2                                                | N/A | N/A |
| 10607557 | ---                                                           | N/A | N/A |
| 10607560 | ---                                                           | N/A | N/A |
| 10607562 | Cnksr2                                                        | N/A | N/A |
| 10607585 | ---                                                           | N/A | N/A |
| 10607587 | Pdha1 /// Map3k15                                             | N/A | N/A |
| 10607600 | ---                                                           | N/A | N/A |
| 10607602 | Ppef1                                                         | N/A | N/A |
| 10607619 | Cdkl5                                                         | N/A | N/A |
| 10607639 | Gja6                                                          | N/A | N/A |
| 10607643 | ---                                                           | N/A | N/A |
| 10607646 | Nhs                                                           | N/A | N/A |
| 10607658 | Reps2                                                         | N/A | N/A |
| 10607679 | Txlng                                                         | N/A | N/A |
| 10607694 | Syap1                                                         | N/A | N/A |
| 10607705 | S100g                                                         | N/A | N/A |
| 10607710 | ---                                                           | N/A | N/A |
| 10607712 | Grpr                                                          | N/A | N/A |
| 10607718 | 1700045I19Rik                                                 | N/A | N/A |
| 10607724 | Zrsr2                                                         | N/A | N/A |
| 10607738 | Car5b                                                         | N/A | N/A |
| 10607747 | Siah1b                                                        | N/A | N/A |
| 10607752 | Bmx                                                           | N/A | N/A |
| 10607774 | Mospd2                                                        | N/A | N/A |
| 10607792 | Gira2                                                         | N/A | N/A |
| 10607804 | ---                                                           | N/A | N/A |
| 10607806 | Ofd1                                                          | N/A | N/A |
| 10607838 | ---                                                           | N/A | N/A |
| 10607841 | Tceanc                                                        | N/A | N/A |
| 10607848 | Egfl6                                                         | N/A | N/A |
| 10607862 | ---                                                           | N/A | N/A |
| 10607865 | Tmsb4x                                                        | N/A | N/A |
| 10607868 | Tlr8                                                          | N/A | N/A |
| 10607870 | Tlr7                                                          | N/A | N/A |
| 10607877 | Prps2                                                         | N/A | N/A |
| 10607886 | Gm6744                                                        | N/A | N/A |
| 10607888 | Frmpd4                                                        | N/A | N/A |
| 10607910 | Msl3                                                          | N/A | N/A |
| 10607924 | Amelx                                                         | N/A | N/A |
| 10607933 | Hccs                                                          | N/A | N/A |
| 10607943 | ---                                                           | N/A | N/A |
| 10607945 | 4933400A11Rik                                                 | N/A | N/A |
| 10607950 | G530011O06Rik                                                 | N/A | N/A |
| 10607952 | Vamp7                                                         | N/A | N/A |
| 10607962 | Ube1y1                                                        | N/A | N/A |
| 10607972 | Kdm5d /// LOC100040412                                        | N/A | N/A |
| 10608001 | Eif2s3y                                                       | N/A | N/A |
| 10608016 | ---                                                           | N/A | N/A |
| 10608018 | ---                                                           | N/A | N/A |
| 10608024 | ---                                                           | N/A | N/A |
| 10608033 | Gm6026 /// Gm16501                                            | N/A | N/A |
| 10608035 | Ube1y1                                                        | N/A | N/A |
| 10608041 | Rbmy1a1                                                       | N/A | N/A |
| 10608062 | Rbmy1a1                                                       | N/A | N/A |
| 10608073 | Rbmy1a1                                                       | N/A | N/A |
| 10608083 | ---                                                           | N/A | N/A |
| 10608085 | ---                                                           | N/A | N/A |
| 10608087 | ---                                                           | N/A | N/A |

|               |                                                     |          |          |
|---------------|-----------------------------------------------------|----------|----------|
| 10608089      | Ube1y1                                              | N/A      | N/A      |
| 10608100      | Zfy1                                                | N/A      | N/A      |
| 10608107      | Uty                                                 | N/A      | N/A      |
| 10608136      | ---                                                 | N/A      | N/A      |
| 10608138      | Ddx3y                                               | N/A      | N/A      |
| 10608156      | Usp9y                                               | N/A      | N/A      |
| 10608182      | ---                                                 | N/A      | N/A      |
| 10608184      | Zfy2                                                | N/A      | N/A      |
| 10608187      | Ube1y1                                              | N/A      | N/A      |
| 10608193      | Sry                                                 | N/A      | N/A      |
| 10608196      | Gm6026 /// Gm16501                                  | N/A      | N/A      |
| 10608198      | ---                                                 | N/A      | N/A      |
| 10608200      | ---                                                 | N/A      | N/A      |
| 10608202      | ---                                                 | N/A      | N/A      |
| 10608204      | ---                                                 | N/A      | N/A      |
| 10608212      | Sly /// LOC100041897                                | N/A      | N/A      |
| 10608237      | Sly /// LOC100042331 /// LOC380994                  | N/A      | N/A      |
| 10608251      | LOC380994                                           | N/A      | N/A      |
| 10608260      | Srsy                                                | N/A      | N/A      |
| 10608263      | Sly /// LOC100041897                                | N/A      | N/A      |
| 10608280      | ---                                                 | N/A      | N/A      |
| 10608286      | ---                                                 | N/A      | N/A      |
| 10608288      | ---                                                 | N/A      | N/A      |
| 10608290      | ---                                                 | N/A      | N/A      |
| 10608298      | ---                                                 | N/A      | N/A      |
| 10608300      | ---                                                 | N/A      | N/A      |
| 10608304      | ---                                                 | N/A      | N/A      |
| 10608311      | ---                                                 | N/A      | N/A      |
| 10608325      | ---                                                 | N/A      | N/A      |
| 10608330      | Sly /// LOC380994 /// LOC100041897                  | N/A      | N/A      |
| 10608352      | LOC380994 /// LOC100042331                          | N/A      | N/A      |
| 10608385      | Sly                                                 | N/A      | N/A      |
| 10608397      | Sly /// LOC100042331 /// LOC380994 /// LOC100041897 | N/A      | N/A      |
| 10608407      | Srsy                                                | N/A      | N/A      |
| 10608410      | Sly /// LOC100041897                                | N/A      | N/A      |
| 10608422      | Rmi1 /// LOC665550                                  | N/A      | N/A      |
| 10608429      | LOC380994                                           | N/A      | N/A      |
| 10608438      | ---                                                 | N/A      | N/A      |
| 10608442      | LOC380994                                           | N/A      | N/A      |
| 10608464      | LOC100042331 /// LOC380994                          | N/A      | N/A      |
| 10608492      | LOC380994                                           | N/A      | N/A      |
| 10608499      | ---                                                 | N/A      | N/A      |
| 10608504      | Rbm31y                                              | N/A      | N/A      |
| 10608509      | ---                                                 | N/A      | N/A      |
| 10608523      | LOC380994                                           | N/A      | N/A      |
| 10608533      | ---                                                 | N/A      | N/A      |
| 10608535      | ---                                                 | N/A      | N/A      |
| 10608539      | ---                                                 | N/A      | N/A      |
| 10608557      | Sly                                                 | N/A      | N/A      |
| 10608579      | ---                                                 | N/A      | N/A      |
| 10608586      | LOC380994 /// Sly /// LOC100042331 /// LOC100041897 | N/A      | N/A      |
| 10608600      | ---                                                 | N/A      | N/A      |
| 10608615      | LOC100042331 /// LOC380994                          | N/A      | N/A      |
|               |                                                     |          |          |
| Liver Class V |                                                     |          |          |
| Probe ID      | Gene ID                                             | Con Peak | TSR Peak |
| 10344931      | Rpl5                                                | N/A      | N/A      |
| 10345423      | Plekhb2                                             | N/A      | N/A      |
| 10345504      | Cox5b                                               | N/A      | N/A      |
| 10345620      | Mrpl30                                              | N/A      | N/A      |
| 10345698      | Tbc1d8 /// Rpl31 /// Gm16382                        | N/A      | N/A      |
| 10346105      | Rpl23a /// Rpl23a-ps1                               | N/A      | N/A      |
| 10346328      | ---                                                 | N/A      | N/A      |
| 10346410      | Aox3                                                | N/A      | N/A      |
| 10346533      | Nif311 /// Ppil3                                    | N/A      | N/A      |
| 10346808      | Rpl17                                               | N/A      | N/A      |
| 10346867      | Eef1b2                                              | N/A      | N/A      |
| 10346874      | ---                                                 | N/A      | N/A      |
| 10347218      | ---                                                 | N/A      | N/A      |
| 10347273      | Rpl37a /// Mir682                                   | N/A      | N/A      |
| 10347873      | Agfg1                                               | N/A      | N/A      |
| 10347917      | Rpl19                                               | N/A      | N/A      |
| 10348775      | Ppp1r7                                              | N/A      | N/A      |
| 10348924      | Rpl18a /// Gm15427                                  | N/A      | N/A      |
| 10349694      | Pm20d1                                              | N/A      | N/A      |
| 10350614      | 1190005F20Rik                                       | N/A      | N/A      |
| 10350816      | Rpl35 /// Gm10269                                   | N/A      | N/A      |
| 10350948      | ---                                                 | N/A      | N/A      |
| 10350990      | Rpl23a /// Gm6177                                   | N/A      | N/A      |
| 10350992      | Rc3h1                                               | N/A      | N/A      |
| 10351043      | Snord47                                             | N/A      | N/A      |
| 10351504      | ---                                                 | N/A      | N/A      |
| 10351546      | Apoa2                                               | N/A      | N/A      |
| 10352092      | Zfp238                                              | N/A      | N/A      |

|          |                                         |     |     |
|----------|-----------------------------------------|-----|-----|
| 10352348 | Cnih4                                   | N/A | N/A |
| 10352396 | Trp53bp2                                | N/A | N/A |
| 10352503 | Bpnt1                                   | N/A | N/A |
| 10352756 | Lpgat1                                  | N/A | N/A |
| 10353061 | ---                                     | N/A | N/A |
| 10353064 | Arfgef1                                 | N/A | N/A |
| 10353265 | Rpl7 /// Gm5045                         | N/A | N/A |
| 10353341 | Hmgb1                                   | N/A | N/A |
| 10353545 | 1110058L19Rik                           | N/A | N/A |
| 10353689 | Phf3                                    | N/A | N/A |
| 10353729 | Gm5415 /// 4930444G20Rik /// Gm9839     | N/A | N/A |
| 10353731 | Gm5415 /// 4930444G20Rik /// Gm9839     | N/A | N/A |
| 10353947 | Tmem131                                 | N/A | N/A |
| 10353991 | Rpl12 /// Rpl12-ps1                     | N/A | N/A |
| 10354372 | Myl6 /// Gm8894                         | N/A | N/A |
| 10354470 | Rpl15 /// Gm4294                        | N/A | N/A |
| 10354739 | Atp5l                                   | N/A | N/A |
| 10354768 | Akr1b3 /// Gm6644                       | N/A | N/A |
| 10355844 | Dnpep                                   | N/A | N/A |
| 10356194 | Trip12                                  | N/A | N/A |
| 10356482 | ---                                     | N/A | N/A |
| 10356778 | Rpl17                                   | N/A | N/A |
| 10357124 | Tsn                                     | N/A | N/A |
| 10357292 | Ddx18                                   | N/A | N/A |
| 10357478 | Rpl31 /// Gm16382                       | N/A | N/A |
| 10357514 | ---                                     | N/A | N/A |
| 10358609 | Hmcn1                                   | N/A | N/A |
| 10358709 | Cox7b                                   | N/A | N/A |
| 10359422 | Prdx6                                   | N/A | N/A |
| 10359961 | Uhmk1                                   | N/A | N/A |
| 10360128 | Rpl27                                   | N/A | N/A |
| 10360460 | Chml                                    | N/A | N/A |
| 10360522 | Adss                                    | N/A | N/A |
| 10360679 | H3f3a /// Gm12657                       | N/A | N/A |
| 10360840 | Mosc1                                   | N/A | N/A |
| 10361065 | Mfsd7b                                  | N/A | N/A |
| 10361640 | ---                                     | N/A | N/A |
| 10361816 | Rpl23a /// Gm3940 /// Gm10335           | N/A | N/A |
| 10362273 | Tmem200a /// Gm9767                     | N/A | N/A |
| 10362892 | Pam16                                   | N/A | N/A |
| 10363000 | Gpx4                                    | N/A | N/A |
| 10363368 | Timm23                                  | N/A | N/A |
| 10363622 | 3110049J23Rik                           | N/A | N/A |
| 10363699 | Rps6 /// Gm16409                        | N/A | N/A |
| 10364038 | Upb1                                    | N/A | N/A |
| 10364102 | Chchd10                                 | N/A | N/A |
| 10364293 | Ube2g2                                  | N/A | N/A |
| 10364373 | Lsm7                                    | N/A | N/A |
| 10364455 | Cdc34                                   | N/A | N/A |
| 10364696 | Atp5d                                   | N/A | N/A |
| 10364744 | Ndufs7                                  | N/A | N/A |
| 10365337 | ---                                     | N/A | N/A |
| 10365601 | Gnptab                                  | N/A | N/A |
| 10365891 | Tmcc3                                   | N/A | N/A |
| 10365983 | Lum                                     | N/A | N/A |
| 10366004 | Atp2b1                                  | N/A | N/A |
| 10366229 | Lin7a                                   | N/A | N/A |
| 10366546 | Cpm                                     | N/A | N/A |
| 10366593 | ---                                     | N/A | N/A |
| 10367059 | BC089597                                | N/A | N/A |
| 10367091 | Naca                                    | N/A | N/A |
| 10367106 | Atp5b                                   | N/A | N/A |
| 10367215 | Apon                                    | N/A | N/A |
| 10368220 | ---                                     | N/A | N/A |
| 10368343 | Arg1                                    | N/A | N/A |
| 10368504 | Rpl12                                   | N/A | N/A |
| 10368720 | Slc16a10                                | N/A | N/A |
| 10368886 | Foxo3                                   | N/A | N/A |
| 10369154 | Man1a                                   | N/A | N/A |
| 10369206 | Rps8 /// Gm11353 /// Rps8-ps1           | N/A | N/A |
| 10369210 | Serinc1                                 | N/A | N/A |
| 10369295 | Anapc16                                 | N/A | N/A |
| 10369774 | Nrbf2                                   | N/A | N/A |
| 10369877 | Ube2d1                                  | N/A | N/A |
| 10369989 | Ddt                                     | N/A | N/A |
| 10370777 | 2310011J03Rik                           | N/A | N/A |
| 10371002 | Lsm7                                    | N/A | N/A |
| 10371037 | Slc39a3                                 | N/A | N/A |
| 10371265 | Rpl23a /// Gm3940 /// Gm6177 /// Gm8290 | N/A | N/A |
| 10371267 | Rpl23a /// Gm3940 /// Gm6177 /// Gm8290 | N/A | N/A |
| 10371269 | Rpl23a /// Gm3940 /// Gm6177 /// Gm8290 | N/A | N/A |
| 10371275 | Rpl23a /// Gm3940 /// Gm6177 /// Gm8290 | N/A | N/A |
| 10371293 | 1190007I07Rik                           | N/A | N/A |
| 10371307 | Nfyb                                    | N/A | N/A |

|          |                                         |     |     |
|----------|-----------------------------------------|-----|-----|
| 10371811 | Scyl2                                   | N/A | N/A |
| 10371842 | Uhrf1bp1                                | N/A | N/A |
| 10372114 | Gm8671                                  | N/A | N/A |
| 10373027 | Tspan31 /// Cdk4                        | N/A | N/A |
| 10373396 | Myf6                                    | N/A | N/A |
| 10373448 | Rpl41                                   | N/A | N/A |
| 10373498 | Rps26                                   | N/A | N/A |
| 10373519 | Rpl12                                   | N/A | N/A |
| 10373651 | ---                                     | N/A | N/A |
| 10374175 | Ppia                                    | N/A | N/A |
| 10374476 | Rps17 /// Gm12034                       | N/A | N/A |
| 10374840 | ---                                     | N/A | N/A |
| 10375229 | ---                                     | N/A | N/A |
| 10375461 | Rpl7 /// Gm5045                         | N/A | N/A |
| 10375926 | Ppp2ca                                  | N/A | N/A |
| 10376314 | Cnot8                                   | N/A | N/A |
| 10376461 | Trim11                                  | N/A | N/A |
| 10376885 | Snord49b                                | N/A | N/A |
| 10377429 | Snord118                                | N/A | N/A |
| 10377541 | Lsmd1 /// Tmem88                        | N/A | N/A |
| 10377689 | Gabarap                                 | N/A | N/A |
| 10378126 | Ankfy1                                  | N/A | N/A |
| 10378637 | Scarf1                                  | N/A | N/A |
| 10379736 | 1100001G20Rik                           | N/A | N/A |
| 10379875 | Rpl13                                   | N/A | N/A |
| 10380670 | Rpl17 /// Gm10268 /// Rpl17-ps3         | N/A | N/A |
| 10380815 | Psb3                                    | N/A | N/A |
| 10380821 | Atp5f1                                  | N/A | N/A |
| 10380833 | Rpl19                                   | N/A | N/A |
| 10381187 | Atp6v0a1                                | N/A | N/A |
| 10381381 | ---                                     | N/A | N/A |
| 10381402 | Rpl27                                   | N/A | N/A |
| 10381458 | Rnu2                                    | N/A | N/A |
| 10381460 | Rnu2                                    | N/A | N/A |
| 10381470 | Rnu2                                    | N/A | N/A |
| 10381472 | Rnu2                                    | N/A | N/A |
| 10381939 | Tanc2                                   | N/A | N/A |
| 10382081 | ---                                     | N/A | N/A |
| 10382104 | Snord104                                | N/A | N/A |
| 10382189 | Apoh                                    | N/A | N/A |
| 10382369 | Rpl38                                   | N/A | N/A |
| 10382470 | Tmem104                                 | N/A | N/A |
| 10383850 | ---                                     | N/A | N/A |
| 10383887 | Uqcr10                                  | N/A | N/A |
| 10384100 | Rps15a /// Gm11968                      | N/A | N/A |
| 10384552 | Gapdh /// Gm2606 /// Gm2451 /// Gm10293 | N/A | N/A |
| 10384577 | ---                                     | N/A | N/A |
| 10384603 | Mdh1                                    | N/A | N/A |
| 10385034 | Rpsa                                    | N/A | N/A |
| 10385043 | Npm1                                    | N/A | N/A |
| 10385426 | Hmgbl1                                  | N/A | N/A |
| 10385557 | Cnot6                                   | N/A | N/A |
| 10385570 | Rpl30 /// Gm12191 /// Gm6570 /// Gm6109 | N/A | N/A |
| 10385716 | O610009B22Rik                           | N/A | N/A |
| 10385719 | Sec24a                                  | N/A | N/A |
| 10385790 | Hspa4                                   | N/A | N/A |
| 10385818 | Uqcrq                                   | N/A | N/A |
| 10385926 | Cdc42se2                                | N/A | N/A |
| 10386005 | Atp5f1                                  | N/A | N/A |
| 10386187 | Rpl24                                   | N/A | N/A |
| 10386442 | Cops3                                   | N/A | N/A |
| 10386527 | ---                                     | N/A | N/A |
| 10386529 | ---                                     | N/A | N/A |
| 10386533 | ---                                     | N/A | N/A |
| 10386535 | ---                                     | N/A | N/A |
| 10386537 | ---                                     | N/A | N/A |
| 10386541 | ---                                     | N/A | N/A |
| 10386546 | ---                                     | N/A | N/A |
| 10386949 | Hmgbl1                                  | N/A | N/A |
| 10387559 | Senp3                                   | N/A | N/A |
| 10387983 | ---                                     | N/A | N/A |
| 10388225 | ---                                     | N/A | N/A |
| 10388461 | Cox7c /// Gm10012                       | N/A | N/A |
| 10388520 | Glod4                                   | N/A | N/A |
| 10388579 | Gosr1                                   | N/A | N/A |
| 10388591 | Cpd                                     | N/A | N/A |
| 10388682 | Taok1                                   | N/A | N/A |
| 10388776 | Rpl23a /// Gm3940 /// Gm10335           | N/A | N/A |
| 10388884 | Nik                                     | N/A | N/A |
| 10389062 | 1700071K01Rik                           | N/A | N/A |
| 10389162 | Rpl12                                   | N/A | N/A |
| 10389331 | Znhit3 /// Myo19                        | N/A | N/A |
| 10389339 | Usp32                                   | N/A | N/A |
| 10389373 | Appbp2                                  | N/A | N/A |

|          |                                                                          |     |     |
|----------|--------------------------------------------------------------------------|-----|-----|
| 10389858 | Dscaml1 /// Nme2                                                         | N/A | N/A |
| 10389875 | Rpl27                                                                    | N/A | N/A |
| 10390237 | Atp5g1                                                                   | N/A | N/A |
| 10390283 | Cdk5rap3                                                                 | N/A | N/A |
| 10390381 | Npepps                                                                   | N/A | N/A |
| 10390595 | Med1                                                                     | N/A | N/A |
| 10391488 | Rnu2                                                                     | N/A | N/A |
| 10391963 | Nsf                                                                      | N/A | N/A |
| 10392881 | Fdxr                                                                     | N/A | N/A |
| 10392930 | Atp5h /// Gm4953 /// Gm5048                                              | N/A | N/A |
| 10393823 | P4hb                                                                     | N/A | N/A |
| 10393926 | Dcxr                                                                     | N/A | N/A |
| 10394142 | Hmgb1                                                                    | N/A | N/A |
| 10394353 | O610009D07Rik                                                            | N/A | N/A |
| 10394532 | Ube2f /// Gm5434                                                         | N/A | N/A |
| 10394558 | Rpl29 /// Gm3550                                                         | N/A | N/A |
| 10394591 | Rpl15 /// Gm4294                                                         | N/A | N/A |
| 10394776 | ---                                                                      | N/A | N/A |
| 10394778 | Hpcal1                                                                   | N/A | N/A |
| 10395005 | Kidins220                                                                | N/A | N/A |
| 10395250 | ---                                                                      | N/A | N/A |
| 10395312 | Twistnb                                                                  | N/A | N/A |
| 10395737 | Rpl21 /// Gm7555                                                         | N/A | N/A |
| 10395925 | Mia2                                                                     | N/A | N/A |
| 10396030 | Fancm                                                                    | N/A | N/A |
| 10396059 | Rpl17 /// Gm10268 /// Rpl17-ps3                                          | N/A | N/A |
| 10396193 | Psma3                                                                    | N/A | N/A |
| 10396278 | Daam1                                                                    | N/A | N/A |
| 10396421 | Hif1a                                                                    | N/A | N/A |
| 10396694 | Churc1                                                                   | N/A | N/A |
| 10396896 | Slc39a9                                                                  | N/A | N/A |
| 10396919 | 4933426M11Rik                                                            | N/A | N/A |
| 10397094 | Psen1                                                                    | N/A | N/A |
| 10397699 | Rpl30 /// Gm12191 /// Gm6570 /// Gm5481 /// Gm6109                       | N/A | N/A |
| 10397741 | Psmc1                                                                    | N/A | N/A |
| 10398147 | Papola                                                                   | N/A | N/A |
| 10398173 | Vrk1                                                                     | N/A | N/A |
| 10398368 | ---                                                                      | N/A | N/A |
| 10398451 | Rps25 /// Gm4963                                                         | N/A | N/A |
| 10398599 | Rps19 /// Rps19-ps3 /// Gm6636                                           | N/A | N/A |
| 10398678 | Eif5                                                                     | N/A | N/A |
| 10398693 | Snora28                                                                  | N/A | N/A |
| 10399428 | Snord118                                                                 | N/A | N/A |
| 10399760 | Rps7 /// Gm9493                                                          | N/A | N/A |
| 10399823 | ---                                                                      | N/A | N/A |
| 10400153 | Hmgb1                                                                    | N/A | N/A |
| 10400210 | Hectd1                                                                   | N/A | N/A |
| 10400334 | Rpl31 /// Gm16382                                                        | N/A | N/A |
| 10400470 | Cox6c                                                                    | N/A | N/A |
| 10400515 | Sec23a                                                                   | N/A | N/A |
| 10400570 | ---                                                                      | N/A | N/A |
| 10400581 | Fkbp3 /// Prpf39                                                         | N/A | N/A |
| 10400984 | Tmem30b                                                                  | N/A | N/A |
| 10401023 | Wdr89 /// Rplp2                                                          | N/A | N/A |
| 10401172 | Vti1b /// Arg2                                                           | N/A | N/A |
| 10401924 | Rpl31 /// Rpl31-ps1 /// Gm16382                                          | N/A | N/A |
| 10401958 | Naca                                                                     | N/A | N/A |
| 10401997 | Ptpn21                                                                   | N/A | N/A |
| 10402394 | Serpina1d                                                                | N/A | N/A |
| 10402648 | Brp44l                                                                   | N/A | N/A |
| 10402750 | Hmgb1                                                                    | N/A | N/A |
| 10402835 | Nudt14                                                                   | N/A | N/A |
| 10403052 | ---                                                                      | N/A | N/A |
| 10403253 | Rps4x                                                                    | N/A | N/A |
| 10403322 | Akr1c6                                                                   | N/A | N/A |
| 10403394 | ---                                                                      | N/A | N/A |
| 10403706 | Psma2                                                                    | N/A | N/A |
| 10403750 | 2810021B07Rik                                                            | N/A | N/A |
| 10403911 | Gpx6                                                                     | N/A | N/A |
| 10403957 | Hist1h4m /// Hist1h4b /// Hist1h4f /// Hist1h4a /// Hist1h4i /// Gm11275 | N/A | N/A |
| 10404067 | Hist1h4m /// Hist1h4c /// Hist1h4a /// Hist1h4b /// Hist1h4f /// Gm11275 | N/A | N/A |
| 10404077 | Slc17a2                                                                  | N/A | N/A |
| 10404262 | Rps8 /// Gm11353 /// Rps8-ps1                                            | N/A | N/A |
| 10404354 | Rps18 /// Gm10260                                                        | N/A | N/A |
| 10404731 | Tmem14c                                                                  | N/A | N/A |
| 10404928 | C78339                                                                   | N/A | N/A |
| 10404996 | Ninj1                                                                    | N/A | N/A |
| 10405462 | BC038268 /// Pfn3                                                        | N/A | N/A |
| 10405535 | B230219D22Rik                                                            | N/A | N/A |
| 10405539 | Txndc15                                                                  | N/A | N/A |
| 10405587 | Tgfb1                                                                    | N/A | N/A |
| 10405626 | Rpl17 /// Gm10268 /// Rpl17-ps3                                          | N/A | N/A |
| 10405729 | Selk                                                                     | N/A | N/A |
| 10405853 | Zfp369                                                                   | N/A | N/A |

|          |                                                                          |     |     |
|----------|--------------------------------------------------------------------------|-----|-----|
| 10406024 | Rps28                                                                    | N/A | N/A |
| 10406250 | Rpl37a /// Mir682                                                        | N/A | N/A |
| 10406777 | Gcnt4                                                                    | N/A | N/A |
| 10407120 | Rps3a /// Gm9000                                                         | N/A | N/A |
| 10407319 | Rpl34 /// Gm6404 /// Gm10154                                             | N/A | N/A |
| 10407346 | ---                                                                      | N/A | N/A |
| 10407507 | Rpl35a /// Ino80 /// Gm10247                                             | N/A | N/A |
| 10407570 | Zmynd11                                                                  | N/A | N/A |
| 10407907 | Rala                                                                     | N/A | N/A |
| 10408074 | Hist1h4m /// Hist1h4k /// Gm11275 /// Hist1h4j /// Hist1h4a /// Hist1h4b | N/A | N/A |
| 10408092 | Hist1h4i /// Hist1h4m /// Hist1h4f /// Hist1h4a /// Hist1h4b /// Gm11275 | N/A | N/A |
| 10408113 | Hist1h4i                                                                 | N/A | N/A |
| 10408121 | ---                                                                      | N/A | N/A |
| 10408200 | Hist1h4f                                                                 | N/A | N/A |
| 10408243 | Hist1h4m /// Hist1h4a /// Hist1h4f /// Hist1h4b /// Gm11275              | N/A | N/A |
| 10408600 | Serpinh6a                                                                | N/A | N/A |
| 10408687 | Hmgb1                                                                    | N/A | N/A |
| 10409014 | ---                                                                      | N/A | N/A |
| 10409212 | ---                                                                      | N/A | N/A |
| 10409220 | Hist2h2aa1 /// Hist2h2aa2 /// Hist2h3c1 /// Hist2h2ac                    | N/A | N/A |
| 10409449 | F12                                                                      | N/A | N/A |
| 10409592 | Lect2                                                                    | N/A | N/A |
| 10409689 | Hnrnpk                                                                   | N/A | N/A |
| 10409968 | Rps18                                                                    | N/A | N/A |
| 10410506 | Rpl9 /// Gm5451                                                          | N/A | N/A |
| 10410590 | Exoc3                                                                    | N/A | N/A |
| 10410721 | Arsk                                                                     | N/A | N/A |
| 10410921 | Cox7c /// Gm10012                                                        | N/A | N/A |
| 10411393 | Rps18 /// Gm10260                                                        | N/A | N/A |
| 10411454 | Sec61b                                                                   | N/A | N/A |
| 10411491 | Trpo1                                                                    | N/A | N/A |
| 10411882 | Nln                                                                      | N/A | N/A |
| 10412378 | H3f3a                                                                    | N/A | N/A |
| 10413008 | Fut11                                                                    | N/A | N/A |
| 10413014 | Chchd1                                                                   | N/A | N/A |
| 10413174 | Rps24 /// Gm6030                                                         | N/A | N/A |
| 10413304 | Arf4                                                                     | N/A | N/A |
| 10413542 | Tkt                                                                      | N/A | N/A |
| 10413752 | Bap1                                                                     | N/A | N/A |
| 10414078 | Rpl23a /// Gm3940 /// Gm10335                                            | N/A | N/A |
| 10414767 | Rps19 /// Rps19-ps3 /// Gm6636                                           | N/A | N/A |
| 10414874 | Rps19 /// Rps19-ps3 /// Gm6636                                           | N/A | N/A |
| 10415640 | Rpl12 /// Snora65                                                        | N/A | N/A |
| 10415660 | Rpl13                                                                    | N/A | N/A |
| 10415955 | ---                                                                      | N/A | N/A |
| 10415960 | Ints9                                                                    | N/A | N/A |
| 10416437 | Lcp1                                                                     | N/A | N/A |
| 10416496 | Tpt1 /// Tpt1p                                                           | N/A | N/A |
| 10416732 | Snora30                                                                  | N/A | N/A |
| 10416793 | Uchl3                                                                    | N/A | N/A |
| 10416835 | Rpl17 /// Gm10268 /// Rpl17-ps3                                          | N/A | N/A |
| 10417664 | Rpl19                                                                    | N/A | N/A |
| 10417730 | ---                                                                      | N/A | N/A |
| 10417745 | Rpl15 /// Gm4294                                                         | N/A | N/A |
| 10417794 | 1810063B07Rik                                                            | N/A | N/A |
| 10418164 | ---                                                                      | N/A | N/A |
| 10418169 | 1700054Q19Rik                                                            | N/A | N/A |
| 10418498 | Rpl7a                                                                    | N/A | N/A |
| 10418804 | Timm23                                                                   | N/A | N/A |
| 10418991 | Gcap14                                                                   | N/A | N/A |
| 10419469 | ---                                                                      | N/A | N/A |
| 10419729 | Nrbf2                                                                    | N/A | N/A |
| 10419731 | Nrbf2                                                                    | N/A | N/A |
| 10420011 | Myl6 /// Gm8894                                                          | N/A | N/A |
| 10420080 | Mdp1                                                                     | N/A | N/A |
| 10420657 | Rps12 /// Gm10063 /// Rps12-ps2                                          | N/A | N/A |
| 10420837 | Extl3                                                                    | N/A | N/A |
| 10421526 | Rb1                                                                      | N/A | N/A |
| 10421571 | Rps6 /// Rps6-ps2 /// Gm16409                                            | N/A | N/A |
| 10421707 | Rpl23a /// Gm3940 /// Gm10335                                            | N/A | N/A |
| 10421972 | Rpl36a                                                                   | N/A | N/A |
| 10422024 | ---                                                                      | N/A | N/A |
| 10422057 | Rpl7a /// Gm16477 /// Rpl7a-ps10                                         | N/A | N/A |
| 10422161 | Gm10293                                                                  | N/A | N/A |
| 10422512 | A2ld1                                                                    | N/A | N/A |
| 10422699 | ---                                                                      | N/A | N/A |
| 10422701 | Rpl37                                                                    | N/A | N/A |
| 10422707 | Prkaa1                                                                   | N/A | N/A |
| 10422852 | Rpl19                                                                    | N/A | N/A |
| 10422962 | 1110020G09Rik                                                            | N/A | N/A |
| 10422980 | Lmbrd2                                                                   | N/A | N/A |
| 10423172 | Golph3                                                                   | N/A | N/A |
| 10423289 | ---                                                                      | N/A | N/A |
| 10423293 | Myo10                                                                    | N/A | N/A |

|          |                                                                         |     |     |
|----------|-------------------------------------------------------------------------|-----|-----|
| 10423556 | Pgcp                                                                    | N/A | N/A |
| 10424413 | Hmgb1                                                                   | N/A | N/A |
| 10424439 | Efr3a                                                                   | N/A | N/A |
| 10424559 | Khdrbs3                                                                 | N/A | N/A |
| 10424686 | BC025446                                                                | N/A | N/A |
| 10424823 | Rps6 /// Gm16409                                                        | N/A | N/A |
| 10424979 | Gpt                                                                     | N/A | N/A |
| 10425024 | 1110038F14Rik                                                           | N/A | N/A |
| 10425211 | Gcat                                                                    | N/A | N/A |
| 10425628 | Gm5805                                                                  | N/A | N/A |
| 10425721 | Mir33                                                                   | N/A | N/A |
| 10425763 | Cyp2d9                                                                  | N/A | N/A |
| 10425799 | Rnu12                                                                   | N/A | N/A |
| 10425880 | Prr5                                                                    | N/A | N/A |
| 10426435 | Gapdh /// Gm12070 /// Gm2606 /// Gm4609 /// Gm10290 /// Gm10291         | N/A | N/A |
| 10426437 | Rn7sk                                                                   | N/A | N/A |
| 10426648 | Rpl36 /// Gm13611 /// Gm8973                                            | N/A | N/A |
| 10426889 | Sec61b                                                                  | N/A | N/A |
| 10427199 | Pfdn5                                                                   | N/A | N/A |
| 10427205 | Myg1                                                                    | N/A | N/A |
| 10427266 | Rpl39                                                                   | N/A | N/A |
| 10427459 | ---                                                                     | N/A | N/A |
| 10427521 | Wdr70                                                                   | N/A | N/A |
| 10427814 | Golph3                                                                  | N/A | N/A |
| 10427849 | 6030458C11Rik                                                           | N/A | N/A |
| 10427995 | ---                                                                     | N/A | N/A |
| 10428119 | Cox6c                                                                   | N/A | N/A |
| 10428169 | Rpl7a /// Rpl7a-ps3 /// Rpl7a-ps5 /// Gm5619 /// Gm16477 /// Rpl7a-ps10 | N/A | N/A |
| 10428338 | Dpys                                                                    | N/A | N/A |
| 10428396 | ---                                                                     | N/A | N/A |
| 10428398 | Eif3e                                                                   | N/A | N/A |
| 10428447 | ---                                                                     | N/A | N/A |
| 10428576 | Rpl15 /// Gm4294                                                        | N/A | N/A |
| 10428602 | ---                                                                     | N/A | N/A |
| 10428690 | Mrpl13                                                                  | N/A | N/A |
| 10429389 | Rpl17 /// Gm10268 /// Rpl17-ps3                                         | N/A | N/A |
| 10429455 | Hmgb1 /// Hmg11                                                         | N/A | N/A |
| 10429588 | 9030619P08Rik                                                           | N/A | N/A |
| 10429666 | Pycl1                                                                   | N/A | N/A |
| 10429957 | Fbxl6                                                                   | N/A | N/A |
| 10430618 | Dnalc4                                                                  | N/A | N/A |
| 10430681 | Rps19bp1                                                                | N/A | N/A |
| 10430768 | ---                                                                     | N/A | N/A |
| 10430851 | Cyp2d22                                                                 | N/A | N/A |
| 10431282 | 2810001A02Rik                                                           | N/A | N/A |
| 10431656 | Rpl31 /// Gm16382                                                       | N/A | N/A |
| 10432918 | Krt8                                                                    | N/A | N/A |
| 10433049 | Atp5g2                                                                  | N/A | N/A |
| 10433262 | Rpl7a /// Gm5766                                                        | N/A | N/A |
| 10433562 | Rpl30 /// Gm12191 /// Gm6570 /// Gm5481 /// Gm6109                      | N/A | N/A |
| 10433575 | Gm10832                                                                 | N/A | N/A |
| 10433902 | Rpl30 /// Gm12191 /// Gm5481                                            | N/A | N/A |
| 10433937 | ---                                                                     | N/A | N/A |
| 10433940 | Mapk1                                                                   | N/A | N/A |
| 10433988 | Serpind1                                                                | N/A | N/A |
| 10434233 | Ufd1l                                                                   | N/A | N/A |
| 10434643 | Psmb3                                                                   | N/A | N/A |
| 10434645 | Senp2                                                                   | N/A | N/A |
| 10434664 | Ndufa11                                                                 | N/A | N/A |
| 10434743 | ---                                                                     | N/A | N/A |
| 10435455 | Rpl35a /// Ino80 /// Gm10247                                            | N/A | N/A |
| 10435784 | Ndufs5 /// BC002163                                                     | N/A | N/A |
| 10435980 | Rps24 /// Gm6030                                                        | N/A | N/A |
| 10436048 | Prdx1                                                                   | N/A | N/A |
| 10436182 | Cd47                                                                    | N/A | N/A |
| 10436232 | Rpl24                                                                   | N/A | N/A |
| 10436392 | Cpox                                                                    | N/A | N/A |
| 10436402 | Cldnd1                                                                  | N/A | N/A |
| 10436456 | Prosl                                                                   | N/A | N/A |
| 10436748 | 2310034C09Rik                                                           | N/A | N/A |
| 10436783 | Sod1                                                                    | N/A | N/A |
| 10436830 | Ifnar2                                                                  | N/A | N/A |
| 10436890 | Gm10785                                                                 | N/A | N/A |
| 10437594 | Usp7                                                                    | N/A | N/A |
| 10437627 | Rpl35a /// Ino80 /// Gm10247                                            | N/A | N/A |
| 10437934 | Rpsa /// Rpsa-ps10                                                      | N/A | N/A |
| 10438313 | Dgcr8 /// Trmt2a                                                        | N/A | N/A |
| 10438517 | Alg3                                                                    | N/A | N/A |
| 10438564 | Rps10                                                                   | N/A | N/A |
| 10438583 | Rpl12                                                                   | N/A | N/A |
| 10438911 | Atp13a3                                                                 | N/A | N/A |
| 10439016 | Gm5415 /// 4930444G20Rik /// AF366264 /// Gm9839                        | N/A | N/A |
| 10439204 | Rpl15 /// Gm4294                                                        | N/A | N/A |
| 10439402 | Rpl9 /// Gm5451                                                         | N/A | N/A |

|          |                                                                         |     |     |
|----------|-------------------------------------------------------------------------|-----|-----|
| 10439500 | Upk1b                                                                   | N/A | N/A |
| 10439642 | Slc35a5                                                                 | N/A | N/A |
| 10439878 | Psmc1                                                                   | N/A | N/A |
| 10440037 | Nit2                                                                    | N/A | N/A |
| 10440206 | Arl6                                                                    | N/A | N/A |
| 10440414 | Fau                                                                     | N/A | N/A |
| 10440469 | ---                                                                     | N/A | N/A |
| 10440543 | Ltn1                                                                    | N/A | N/A |
| 10440661 | Rpl13                                                                   | N/A | N/A |
| 10440849 | Synj1                                                                   | N/A | N/A |
| 10441038 | Hlcs                                                                    | N/A | N/A |
| 10441494 | Tulp4                                                                   | N/A | N/A |
| 10442120 | ---                                                                     | N/A | N/A |
| 10442396 | Abca3                                                                   | N/A | N/A |
| 10442454 | Pgp                                                                     | N/A | N/A |
| 10442736 | BC003965                                                                | N/A | N/A |
| 10442914 | O610011F06Rik                                                           | N/A | N/A |
| 10442922 | Cox7c /// Gm10012                                                       | N/A | N/A |
| 10443193 | Rpl30 /// Gm12191                                                       | N/A | N/A |
| 10443808 | Ndufv3                                                                  | N/A | N/A |
| 10444041 | Ndufa7                                                                  | N/A | N/A |
| 10444780 | H2-L /// H2-D1                                                          | N/A | N/A |
| 10445430 | Mrpl14                                                                  | N/A | N/A |
| 10446013 | Mpnd                                                                    | N/A | N/A |
| 10446309 | Cntnap5c                                                                | N/A | N/A |
| 10446615 | Rps24 /// Gm6030                                                        | N/A | N/A |
| 10446804 | Slc30a6                                                                 | N/A | N/A |
| 10446821 | Rps6 /// Gm16409                                                        | N/A | N/A |
| 10447286 | Rpl31                                                                   | N/A | N/A |
| 10447412 | ---                                                                     | N/A | N/A |
| 10447429 | Gm4832                                                                  | N/A | N/A |
| 10447515 | U2af1                                                                   | N/A | N/A |
| 10447566 | Atp5g2                                                                  | N/A | N/A |
| 10447675 | Rnaset2a /// Rnaset2b                                                   | N/A | N/A |
| 10447699 | ---                                                                     | N/A | N/A |
| 10447799 | Igf2r                                                                   | N/A | N/A |
| 10448048 | Psbm1                                                                   | N/A | N/A |
| 10448380 | Tceb2                                                                   | N/A | N/A |
| 10448865 | Gnptg                                                                   | N/A | N/A |
| 10449312 | ---                                                                     | N/A | N/A |
| 10449370 | Rps10                                                                   | N/A | N/A |
| 10449549 | Rpl35a /// Ino80 /// Gm10247                                            | N/A | N/A |
| 10449602 | 1110021J02Rik                                                           | N/A | N/A |
| 10449731 | U2af1                                                                   | N/A | N/A |
| 10449955 | Cyp4f13                                                                 | N/A | N/A |
| 10450050 | Rps28                                                                   | N/A | N/A |
| 10450063 | Rps18 /// Gm10260                                                       | N/A | N/A |
| 10450103 | H2-Ke6                                                                  | N/A | N/A |
| 10450614 | 2310061I04Rik                                                           | N/A | N/A |
| 10450694 | H2-T22 /// H2-T10 /// H2-T9                                             | N/A | N/A |
| 10450744 | ---                                                                     | N/A | N/A |
| 10451301 | Rpl11 /// Gm10288                                                       | N/A | N/A |
| 10451677 | ---                                                                     | N/A | N/A |
| 10452085 | Safb2                                                                   | N/A | N/A |
| 10452384 | Rpl7a /// Rpl7a-ps3 /// Rpl7a-ps5 /// Gm5619 /// Gm16477 /// Rpl7a-ps10 | N/A | N/A |
| 10452468 | Mrops10                                                                 | N/A | N/A |
| 10452854 | Srd5a2                                                                  | N/A | N/A |
| 10452890 | Tceb2                                                                   | N/A | N/A |
| 10452935 | Heatr5b                                                                 | N/A | N/A |
| 10453252 | Hmgb1                                                                   | N/A | N/A |
| 10453373 | Prepl /// Slc3a1                                                        | N/A | N/A |
| 10453690 | Rpl27                                                                   | N/A | N/A |
| 10454057 | ---                                                                     | N/A | N/A |
| 10454097 | Rpl11 /// Gm7589 /// Gm10288 /// Gm10036                                | N/A | N/A |
| 10454286 | Mapre2                                                                  | N/A | N/A |
| 10454296 | Rpl19                                                                   | N/A | N/A |
| 10455015 | Vaultrc5                                                                | N/A | N/A |
| 10455017 | Gm6756                                                                  | N/A | N/A |
| 10455210 | Rpl17 /// Gm10268 /// Rpl17-ps3                                         | N/A | N/A |
| 10455227 | Rnf14                                                                   | N/A | N/A |
| 10455439 | Hmgb1                                                                   | N/A | N/A |
| 10456001 | Rps14                                                                   | N/A | N/A |
| 10456423 | Seh1l                                                                   | N/A | N/A |
| 10456579 | Mex3c                                                                   | N/A | N/A |
| 10456709 | Rpl17 /// Gm10268 /// Rpl17-ps3                                         | N/A | N/A |
| 10456719 | ---                                                                     | N/A | N/A |
| 10456721 | ---                                                                     | N/A | N/A |
| 10456812 | Hdhd2                                                                   | N/A | N/A |
| 10457071 | Cyb5                                                                    | N/A | N/A |
| 10457400 | ---                                                                     | N/A | N/A |
| 10457686 | Dsc2                                                                    | N/A | N/A |
| 10457731 | Rpl35 /// Gm10269                                                       | N/A | N/A |
| 10457920 | Rps25 /// Gm4963                                                        | N/A | N/A |
| 10457927 | ---                                                                     | N/A | N/A |



|          |                                                                         |     |     |
|----------|-------------------------------------------------------------------------|-----|-----|
| 10458016 | Proc                                                                    | N/A | N/A |
| 10458386 | Ndufa2                                                                  | N/A | N/A |
| 10458828 | Cdo1                                                                    | N/A | N/A |
| 10459669 | Rpl5                                                                    | N/A | N/A |
| 10459768 | ---                                                                     | N/A | N/A |
| 10460118 | Socs6                                                                   | N/A | N/A |
| 10460626 | Rnaseh2c                                                                | N/A | N/A |
| 10460726 | Fau                                                                     | N/A | N/A |
| 10461017 | Bad /// Gpr137                                                          | N/A | N/A |
| 10461108 | Iscu                                                                    | N/A | N/A |
| 10461156 | Shhg1                                                                   | N/A | N/A |
| 10461160 | ---                                                                     | N/A | N/A |
| 10461162 | Snord22                                                                 | N/A | N/A |
| 10461389 | Rps7 /// Gm9493                                                         | N/A | N/A |
| 10461640 | ---                                                                     | N/A | N/A |
| 10461671 | Pat1                                                                    | N/A | N/A |
| 10461775 | Gm5244                                                                  | N/A | N/A |
| 10461898 | Rfk                                                                     | N/A | N/A |
| 10462140 | Dock8                                                                   | N/A | N/A |
| 10462361 | Hmgb1                                                                   | N/A | N/A |
| 10462363 | Jak2                                                                    | N/A | N/A |
| 10462473 | Mbl2                                                                    | N/A | N/A |
| 10462683 | Pcgf5                                                                   | N/A | N/A |
| 10462861 | ---                                                                     | N/A | N/A |
| 10463043 | Cyp2c37                                                                 | N/A | N/A |
| 10463153 | Morf411                                                                 | N/A | N/A |
| 10463158 | Al606181                                                                | N/A | N/A |
| 10463803 | Slk                                                                     | N/A | N/A |
| 10463904 | ---                                                                     | N/A | N/A |
| 10464388 | Rps12 /// Gm10063 /// Rps12-ps2                                         | N/A | N/A |
| 10464469 | Rpl7a /// Gm16477                                                       | N/A | N/A |
| 10464825 | Ccs                                                                     | N/A | N/A |
| 10464877 | Dpp3                                                                    | N/A | N/A |
| 10465043 | Gm6293                                                                  | N/A | N/A |
| 10465686 | Rtn3                                                                    | N/A | N/A |
| 10465812 | Ttc9c                                                                   | N/A | N/A |
| 10465831 | 5730408K05Rik                                                           | N/A | N/A |
| 10466127 | AW112010                                                                | N/A | N/A |
| 10466314 | ---                                                                     | N/A | N/A |
| 10466402 | Elf4a1                                                                  | N/A | N/A |
| 10466771 | Fxn                                                                     | N/A | N/A |
| 10466839 | ---                                                                     | N/A | N/A |
| 10466923 | Rpl26 /// Gm10136 /// Gm15772                                           | N/A | N/A |
| 10466947 | Ermp1                                                                   | N/A | N/A |
| 10467162 | Pank1                                                                   | N/A | N/A |
| 10467256 | Rpl10                                                                   | N/A | N/A |
| 10467380 | Cyp2c67                                                                 | N/A | N/A |
| 10467385 | Cyp2c68                                                                 | N/A | N/A |
| 10467390 | Cyp2c40 /// Cyp2c67 /// Cyp2c68 /// Cyp2c69                             | N/A | N/A |
| 10467400 | Cyp2c54                                                                 | N/A | N/A |
| 10468016 | Ndufb8                                                                  | N/A | N/A |
| 10468131 | 9130011E15Rik                                                           | N/A | N/A |
| 10468789 | Pdzd8                                                                   | N/A | N/A |
| 10468929 | Nmt2                                                                    | N/A | N/A |
| 10469035 | Sephs1                                                                  | N/A | N/A |
| 10469151 | Itih5                                                                   | N/A | N/A |
| 10469571 | Otud1                                                                   | N/A | N/A |
| 10470283 | Egfl7                                                                   | N/A | N/A |
| 10470305 | Rpl7a /// Rpl7a-ps3 /// Rpl7a-ps5 /// Gm5619 /// Gm16477 /// Rpl7a-ps10 | N/A | N/A |
| 10470316 | ---                                                                     | N/A | N/A |
| 10470834 | Spna2                                                                   | N/A | N/A |
| 10470893 | BC085271 /// Set                                                        | N/A | N/A |
| 10471036 | Dolpp1                                                                  | N/A | N/A |
| 10471655 | Gsn                                                                     | N/A | N/A |
| 10471951 | ---                                                                     | N/A | N/A |
| 10471953 | Acvr2a                                                                  | N/A | N/A |
| 10472212 | Pkp4                                                                    | N/A | N/A |
| 10472587 | Rpl13                                                                   | N/A | N/A |
| 10472686 | Rpl9 /// Gm5451                                                         | N/A | N/A |
| 10472764 | Dync1i2                                                                 | N/A | N/A |
| 10473160 | Ssfa2                                                                   | N/A | N/A |
| 10473230 | Nup35                                                                   | N/A | N/A |
| 10473281 | Itgav                                                                   | N/A | N/A |
| 10473414 | Ssrp1                                                                   | N/A | N/A |
| 10473547 | Srp9                                                                    | N/A | N/A |
| 10473564 | Oifr1143                                                                | N/A | N/A |
| 10474112 | Traf6                                                                   | N/A | N/A |
| 10474379 | Hadhb                                                                   | N/A | N/A |
| 10474541 | Nop10                                                                   | N/A | N/A |
| 10474545 | Slc12a6                                                                 | N/A | N/A |
| 10474577 | Slc12a6 /// 2410042D21Rik                                               | N/A | N/A |
| 10474867 | ---                                                                     | N/A | N/A |
| 10474915 | Gchfr                                                                   | N/A | N/A |
| 10475435 | Rps12 /// Gm10063 /// Rps12-ps2                                         | N/A | N/A |

|          |                                                                           |     |     |
|----------|---------------------------------------------------------------------------|-----|-----|
| 10475514 | ---                                                                       | N/A | N/A |
| 10476287 | Pank2                                                                     | N/A | N/A |
| 10476383 | Crls1                                                                     | N/A | N/A |
| 10476592 | Macrod2                                                                   | N/A | N/A |
| 10476648 | Dstn                                                                      | N/A | N/A |
| 10476725 | Gm561                                                                     | N/A | N/A |
| 10477100 | ---                                                                       | N/A | N/A |
| 10477167 | Mcts2                                                                     | N/A | N/A |
| 10477264 | Tm9sf4                                                                    | N/A | N/A |
| 10477543 | Cbfa2t2                                                                   | N/A | N/A |
| 10477581 | Rpl5                                                                      | N/A | N/A |
| 10478341 | Ift52                                                                     | N/A | N/A |
| 10479172 | ---                                                                       | N/A | N/A |
| 10479174 | Rps8 /// Gm11353 /// Rps8-ps1                                             | N/A | N/A |
| 10479187 | Rps8 /// Gm11353 /// Rps8-ps1                                             | N/A | N/A |
| 10479215 | Rps8 /// Gm11353 /// Rps8-ps1                                             | N/A | N/A |
| 10479809 | Rps28                                                                     | N/A | N/A |
| 10479996 | Atp5c1                                                                    | N/A | N/A |
| 10480032 | Gapdh /// Gm16374 /// Gm2606 /// Gm4609 /// Gm3200 /// Gm2451 /// Gm10293 | N/A | N/A |
| 10480345 | ---                                                                       | N/A | N/A |
| 10480421 | Pdss1                                                                     | N/A | N/A |
| 10480579 | Mrpl41 /// Wdr85                                                          | N/A | N/A |
| 10481962 | Hc                                                                        | N/A | N/A |
| 10482109 | Rbm18 /// Mrrf                                                            | N/A | N/A |
| 10482119 | ---                                                                       | N/A | N/A |
| 10482267 | Rpl35 /// Gm10269                                                         | N/A | N/A |
| 10482920 | Cd302                                                                     | N/A | N/A |
| 10483322 | ---                                                                       | N/A | N/A |
| 10483563 | Tlk1                                                                      | N/A | N/A |
| 10483786 | Mrpl23                                                                    | N/A | N/A |
| 10483806 | Rps6 /// Gm16409                                                          | N/A | N/A |
| 10483865 | Fkbp7                                                                     | N/A | N/A |
| 10484357 | Rps4x                                                                     | N/A | N/A |
| 10484925 | Gm13777                                                                   | N/A | N/A |
| 10485294 | Hsd17b12                                                                  | N/A | N/A |
| 10485654 | Rpl10                                                                     | N/A | N/A |
| 10485685 | Rpl35a /// Ino80 /// Gm10247                                              | N/A | N/A |
| 10486107 | Srp14                                                                     | N/A | N/A |
| 10486595 | Ttbk2                                                                     | N/A | N/A |
| 10487513 | Anapc1                                                                    | N/A | N/A |
| 10487711 | Ddrgk1                                                                    | N/A | N/A |
| 10487925 | Rpl18                                                                     | N/A | N/A |
| 10488020 | Tmx4                                                                      | N/A | N/A |
| 10488892 | Trpc4ap                                                                   | N/A | N/A |
| 10489045 | Rpl37a /// Mir682                                                         | N/A | N/A |
| 10489235 | 9430008C03Rik                                                             | N/A | N/A |
| 10489553 | Acot8 /// Snx21                                                           | N/A | N/A |
| 10490256 | Rps8 /// Gm11353 /// Rps8-ps1                                             | N/A | N/A |
| 10490350 | Ppp1r3d                                                                   | N/A | N/A |
| 10491058 | Rprl2                                                                     | N/A | N/A |
| 10491064 | ---                                                                       | N/A | N/A |
| 10491091 | Tnfsf10                                                                   | N/A | N/A |
| 10491406 | Ndufb5                                                                    | N/A | N/A |
| 10491967 | Gapdh /// Gm4609 /// Gm10293                                              | N/A | N/A |
| 10492229 | Rpl13                                                                     | N/A | N/A |
| 10492310 | Mbnl1                                                                     | N/A | N/A |
| 10492558 | Smc4                                                                      | N/A | N/A |
| 10492582 | Mir15b                                                                    | N/A | N/A |
| 10492590 | Ppm1l                                                                     | N/A | N/A |
| 10493409 | Scamp3                                                                    | N/A | N/A |
| 10494296 | Rps10                                                                     | N/A | N/A |
| 10494335 | Otud7b                                                                    | N/A | N/A |
| 10494411 | Rnu1b1 /// Rnu1b6 /// Rnu1b2                                              | N/A | N/A |
| 10494417 | Rnu1b1 /// Rnu1b6 /// Rnu1b2                                              | N/A | N/A |
| 10494445 | Lix1l                                                                     | N/A | N/A |
| 10494527 | Rnf115                                                                    | N/A | N/A |
| 10494924 | Trim33                                                                    | N/A | N/A |
| 10495518 | Olfm3                                                                     | N/A | N/A |
| 10495659 | Cnn3                                                                      | N/A | N/A |
| 10495820 | Fabp2                                                                     | N/A | N/A |
| 10495989 | Rpl7a /// Gm5619 /// Gm16477 /// Rpl7a-ps10                               | N/A | N/A |
| 10496295 | Ube2d3                                                                    | N/A | N/A |
| 10496379 | H2afz                                                                     | N/A | N/A |
| 10496475 | Adh5                                                                      | N/A | N/A |
| 10496490 | Mir1956 /// Eif4e                                                         | N/A | N/A |
| 10496626 | Gapdh /// Gm16374 /// Gm2606 /// Gm4609 /// Gm3200 /// Gm2451 /// Gm10293 | N/A | N/A |
| 10496629 | Sep 15                                                                    | N/A | N/A |
| 10496735 | Rpl36a                                                                    | N/A | N/A |
| 10496835 | Hmgb1                                                                     | N/A | N/A |
| 10497173 | Pxmp3                                                                     | N/A | N/A |
| 10497237 | Pag1                                                                      | N/A | N/A |
| 10497296 | Slc10a5                                                                   | N/A | N/A |
| 10497325 | Hmgb1                                                                     | N/A | N/A |
| 10497483 | Hmgb1                                                                     | N/A | N/A |

|          |                                                                           |     |     |
|----------|---------------------------------------------------------------------------|-----|-----|
| 10497673 | Zmat3                                                                     | N/A | N/A |
| 10498405 | Gapdh /// Gm12070                                                         | N/A | N/A |
| 10498775 | Golim4                                                                    | N/A | N/A |
| 10498871 | Tmem144                                                                   | N/A | N/A |
| 10499198 | Rpl30 /// Gm12191 /// Gm6570 /// Gm6109                                   | N/A | N/A |
| 10499748 | Rps27 /// Gm9846                                                          | N/A | N/A |
| 10499854 | S100a1                                                                    | N/A | N/A |
| 10499879 | Rpl3                                                                      | N/A | N/A |
| 10499881 | Rpl3                                                                      | N/A | N/A |
| 10499937 | ---                                                                       | N/A | N/A |
| 10499996 | Snx27                                                                     | N/A | N/A |
| 10500009 | Rpl31 /// Gm16382                                                         | N/A | N/A |
| 10500293 | ---                                                                       | N/A | N/A |
| 10500345 | Terc                                                                      | N/A | N/A |
| 10500356 | Rnu1b1 /// Rnu1b6 /// Rnu1b2                                              | N/A | N/A |
| 10500543 | Hmgb1                                                                     | N/A | N/A |
| 10500736 | Vangl1                                                                    | N/A | N/A |
| 10500990 | Atp5f1                                                                    | N/A | N/A |
| 10501179 | Rpl13                                                                     | N/A | N/A |
| 10501742 | Rpl7a-ps3                                                                 | N/A | N/A |
| 10501811 | Slc44a3                                                                   | N/A | N/A |
| 10501857 | Gapdh /// Gm16374 /// Gm2606 /// Gm4609 /// Gm3200 /// Gm2451 /// Gm10293 | N/A | N/A |
| 10502196 | Rpl34                                                                     | N/A | N/A |
| 10502375 | Mttp                                                                      | N/A | N/A |
| 10502714 | Rpf1                                                                      | N/A | N/A |
| 10503249 | Rpl13                                                                     | N/A | N/A |
| 10503374 | ---                                                                       | N/A | N/A |
| 10503399 | Myl6 /// Gm8894                                                           | N/A | N/A |
| 10503508 | Ggh                                                                       | N/A | N/A |
| 10503523 | Ggh                                                                       | N/A | N/A |
| 10503551 | Usp45                                                                     | N/A | N/A |
| 10503833 | Rplp1                                                                     | N/A | N/A |
| 10503915 | Chchd2                                                                    | N/A | N/A |
| 10504008 | Chmp5                                                                     | N/A | N/A |
| 10504056 | Ubap1                                                                     | N/A | N/A |
| 10504316 | Tesk1                                                                     | N/A | N/A |
| 10504398 | Serf2                                                                     | N/A | N/A |
| 10504564 | Dcaf10                                                                    | N/A | N/A |
| 10504751 | ---                                                                       | N/A | N/A |
| 10504849 | Stx17                                                                     | N/A | N/A |
| 10505109 | BC026590                                                                  | N/A | N/A |
| 10505917 | ---                                                                       | N/A | N/A |
| 10506397 | Mier1                                                                     | N/A | N/A |
| 10506496 | ---                                                                       | N/A | N/A |
| 10506680 | Tmem48                                                                    | N/A | N/A |
| 10506767 | Echdc2                                                                    | N/A | N/A |
| 10507171 | Cyp4a31                                                                   | N/A | N/A |
| 10507177 | Cyp4a10 /// Cyp4a31 /// Cyp4a32                                           | N/A | N/A |
| 10507286 | lpp /// Tmem69                                                            | N/A | N/A |
| 10507328 | Prdx1                                                                     | N/A | N/A |
| 10507520 | Hyi                                                                       | N/A | N/A |
| 10507784 | Ppt1                                                                      | N/A | N/A |
| 10507870 | ---                                                                       | N/A | N/A |
| 10507872 | ---                                                                       | N/A | N/A |
| 10508721 | Snora44                                                                   | N/A | N/A |
| 10508723 | Snora61                                                                   | N/A | N/A |
| 10509014 | D4Wsu53e                                                                  | N/A | N/A |
| 10509275 | Rpl31 /// Gm16382                                                         | N/A | N/A |
| 10509635 | Akr7a5                                                                    | N/A | N/A |
| 10510025 | Agmat                                                                     | N/A | N/A |
| 10510464 | Lzic                                                                      | N/A | N/A |
| 10511149 | Mrpl20                                                                    | N/A | N/A |
| 10511190 | Dvl1                                                                      | N/A | N/A |
| 10511269 | Sdf4                                                                      | N/A | N/A |
| 10511325 | Rps20                                                                     | N/A | N/A |
| 10511444 | Gm11810                                                                   | N/A | N/A |
| 10511498 | Plekhf2                                                                   | N/A | N/A |
| 10511629 | Rpl26 /// Gm10136 /// Gm15772                                             | N/A | N/A |
| 10511739 | Cpne3                                                                     | N/A | N/A |
| 10512022 | Mobkl2b                                                                   | N/A | N/A |
| 10512063 | ---                                                                       | N/A | N/A |
| 10512195 | Ubap2                                                                     | N/A | N/A |
| 10512274 | Enho                                                                      | N/A | N/A |
| 10512487 | Rmrp                                                                      | N/A | N/A |
| 10512701 | Tomm5                                                                     | N/A | N/A |
| 10512728 | Tstd2 /// Tmod1                                                           | N/A | N/A |
| 10512939 | 2610030H06Rik                                                             | N/A | N/A |
| 10512949 | Abca1                                                                     | N/A | N/A |
| 10513006 | ---                                                                       | N/A | N/A |
| 10513145 | Ptpn3                                                                     | N/A | N/A |
| 10513154 | Ptpn3                                                                     | N/A | N/A |
| 10513158 | Ptpn3                                                                     | N/A | N/A |
| 10513529 | Mup3                                                                      | N/A | N/A |
| 10513737 | Rpl17 /// Gm10268 /// Rpl17-ps3                                           | N/A | N/A |

|          |                                                                           |     |     |
|----------|---------------------------------------------------------------------------|-----|-----|
| 10513878 | Rps18 /// Gm10260                                                         | N/A | N/A |
| 10514173 | Rpl34 /// Gm6404 /// Gm10154                                              | N/A | N/A |
| 10514201 | Haus6                                                                     | N/A | N/A |
| 10514233 | Rps6 /// Gm16409                                                          | N/A | N/A |
| 10514902 | Lrrc42                                                                    | N/A | N/A |
| 10514985 | Zyg11b                                                                    | N/A | N/A |
| 10515154 | Rpl3                                                                      | N/A | N/A |
| 10515326 | Tmem69                                                                    | N/A | N/A |
| 10515416 | Rps8 /// Gm5121 /// Gm11353 /// Rps8-ps1                                  | N/A | N/A |
| 10515427 | ---                                                                       | N/A | N/A |
| 10515429 | Snord55                                                                   | N/A | N/A |
| 10515696 | Szt2                                                                      | N/A | N/A |
| 10516211 | Ndufs5                                                                    | N/A | N/A |
| 10516371 | Eif2c1                                                                    | N/A | N/A |
| 10516479 | Rps28                                                                     | N/A | N/A |
| 10516640 | Eif3i                                                                     | N/A | N/A |
| 10516765 | Serinc2                                                                   | N/A | N/A |
| 10517457 | Rpl11 /// Gm7589 /// Gm10288 /// Gm10036                                  | N/A | N/A |
| 10517600 | Pink1                                                                     | N/A | N/A |
| 10517948 | Spen                                                                      | N/A | N/A |
| 10518031 | Dnajc16                                                                   | N/A | N/A |
| 10518453 | Chchd2                                                                    | N/A | N/A |
| 10518679 | Nmnat1                                                                    | N/A | N/A |
| 10518841 | Thap3                                                                     | N/A | N/A |
| 10519096 | Rer1                                                                      | N/A | N/A |
| 10519136 | ---                                                                       | N/A | N/A |
| 10520467 | Hadhb                                                                     | N/A | N/A |
| 10520842 | Bre                                                                       | N/A | N/A |
| 10521036 | Rpl35a /// Ino80 /// Gm10247                                              | N/A | N/A |
| 10521593 | Rpl7 /// Gm5045                                                           | N/A | N/A |
| 10521709 | Lap3                                                                      | N/A | N/A |
| 10521813 | Nsf1c                                                                     | N/A | N/A |
| 10521913 | Rbpj                                                                      | N/A | N/A |
| 10521969 | Immp1l                                                                    | N/A | N/A |
| 10522396 | Ociad1                                                                    | N/A | N/A |
| 10522782 | Rpl7 /// Gm5045                                                           | N/A | N/A |
| 10523275 | ---                                                                       | N/A | N/A |
| 10523354 | Gapdh /// Gm2606 /// Gm10293                                              | N/A | N/A |
| 10523756 | ---                                                                       | N/A | N/A |
| 10523893 | Rpl5                                                                      | N/A | N/A |
| 10523960 | Pigg                                                                      | N/A | N/A |
| 10524018 | Rpl34 /// Gm6404 /// Gm10154                                              | N/A | N/A |
| 10524310 | Ttc28                                                                     | N/A | N/A |
| 10524621 | Oasl2                                                                     | N/A | N/A |
| 10525195 | Gm15800                                                                   | N/A | N/A |
| 10525406 | Anapc7                                                                    | N/A | N/A |
| 10525471 | Ndufb11                                                                   | N/A | N/A |
| 10525983 | Ran                                                                       | N/A | N/A |
| 10526085 | ---                                                                       | N/A | N/A |
| 10526215 | Rps28                                                                     | N/A | N/A |
| 10526381 | Mdh2                                                                      | N/A | N/A |
| 10526792 | O910001L09Rik                                                             | N/A | N/A |
| 10527306 | Lmtk2                                                                     | N/A | N/A |
| 10527448 | Bud31 /// Ptc1                                                            | N/A | N/A |
| 10528167 | Gapdh /// Gm16374 /// Gm4609 /// Gm3200 /// Gm2451 /// Gm10293            | N/A | N/A |
| 10528227 | Gnai1                                                                     | N/A | N/A |
| 10528478 | Rpl17 /// Gm10268 /// Rpl17-ps3                                           | N/A | N/A |
| 10528523 | Tomm7                                                                     | N/A | N/A |
| 10528544 | Rpl11 /// Gm10288 /// Gm10036                                             | N/A | N/A |
| 10528662 | Atp5l                                                                     | N/A | N/A |
| 10528970 | ---                                                                       | N/A | N/A |
| 10529794 | ---                                                                       | N/A | N/A |
| 10529858 | Tap1                                                                      | N/A | N/A |
| 10530140 | ---                                                                       | N/A | N/A |
| 10530283 | ---                                                                       | N/A | N/A |
| 10530287 | Apbb2                                                                     | N/A | N/A |
| 10530563 | Fryl                                                                      | N/A | N/A |
| 10530592 | Fryl                                                                      | N/A | N/A |
| 10531340 | Rpl13                                                                     | N/A | N/A |
| 10531910 | Hsd17b13                                                                  | N/A | N/A |
| 10532025 | Rps15a                                                                    | N/A | N/A |
| 10532027 | Gapdh /// Gm16374 /// Gm2606 /// Gm4609 /// Gm3200 /// Gm2451 /// Gm10293 | N/A | N/A |
| 10532030 | ---                                                                       | N/A | N/A |
| 10532339 | Pxmp2                                                                     | N/A | N/A |
| 10532767 | Ssh1                                                                      | N/A | N/A |
| 10532993 | Cox6a1                                                                    | N/A | N/A |
| 10533526 | ---                                                                       | N/A | N/A |
| 10533549 | Anapc5                                                                    | N/A | N/A |
| 10533612 | Hpd                                                                       | N/A | N/A |
| 10533626 | Rpl35a /// Ino80 /// Gm10247                                              | N/A | N/A |
| 10534096 | Chchd2                                                                    | N/A | N/A |
| 10534405 | Wbscr22 /// Dnajc30                                                       | N/A | N/A |
| 10534583 | ---                                                                       | N/A | N/A |
| 10534660 | Ap1s1                                                                     | N/A | N/A |

|          |                                                                           |     |     |
|----------|---------------------------------------------------------------------------|-----|-----|
| 10534694 | Srrt                                                                      | N/A | N/A |
| 10534964 | Rps25 /// Gm4963                                                          | N/A | N/A |
| 10535471 | Rac1 /// Dagleb                                                           | N/A | N/A |
| 10535575 | Gm6272                                                                    | N/A | N/A |
| 10535647 | Atp5j2                                                                    | N/A | N/A |
| 10536505 | Met                                                                       | N/A | N/A |
| 10536996 | Klhdc10                                                                   | N/A | N/A |
| 10537244 | Rpl17 /// Rpl17-ps3                                                       | N/A | N/A |
| 10537349 | Rpl30 /// Gm12191 /// Gm6570 /// Gm6109                                   | N/A | N/A |
| 10537394 | 1110001J03Rik                                                             | N/A | N/A |
| 10537452 | Ndufb2                                                                    | N/A | N/A |
| 10537504 | ---                                                                       | N/A | N/A |
| 10537880 | ---                                                                       | N/A | N/A |
| 10537909 | Rny3                                                                      | N/A | N/A |
| 10538080 | Rpl35a /// Ino80 /// Gm10247                                              | N/A | N/A |
| 10538420 | Gars                                                                      | N/A | N/A |
| 10538638 | ---                                                                       | N/A | N/A |
| 10538842 | Gng12                                                                     | N/A | N/A |
| 10538963 | Rpl34 /// Gm6404 /// Gm10154                                              | N/A | N/A |
| 10539159 | Suc1g1                                                                    | N/A | N/A |
| 10539484 | Rpl18                                                                     | N/A | N/A |
| 10539700 | Rps28                                                                     | N/A | N/A |
| 10540507 | H3f3a                                                                     | N/A | N/A |
| 10540542 | LOC100503669                                                              | N/A | N/A |
| 10540999 | H2afz                                                                     | N/A | N/A |
| 10541094 | Zfp637                                                                    | N/A | N/A |
| 10541494 | Rps27a                                                                    | N/A | N/A |
| 10542038 | Hmgb1                                                                     | N/A | N/A |
| 10542077 | Rpl18                                                                     | N/A | N/A |
| 10542470 | Mgst1                                                                     | N/A | N/A |
| 10542677 | Etnk1                                                                     | N/A | N/A |
| 10542722 | Rps25 /// Gm4963                                                          | N/A | N/A |
| 10542872 | Rps4y2                                                                    | N/A | N/A |
| 10543052 | Rps27a                                                                    | N/A | N/A |
| 10543118 | Glcci1                                                                    | N/A | N/A |
| 10543134 | Ndufa4                                                                    | N/A | N/A |
| 10543464 | Rpl7a                                                                     | N/A | N/A |
| 10543549 | ---                                                                       | N/A | N/A |
| 10543859 | Akr1b3 /// Gm6644                                                         | N/A | N/A |
| 10544540 | Rpl35a /// Ino80 /// Gm10247                                              | N/A | N/A |
| 10544573 | Lrrc61 /// Rarres2                                                        | N/A | N/A |
| 10544640 | Tra2a                                                                     | N/A | N/A |
| 10544812 | Rpl38                                                                     | N/A | N/A |
| 10544932 | Inmt                                                                      | N/A | N/A |
| 10545125 | Rpl23                                                                     | N/A | N/A |
| 10545192 | Rpl1                                                                      | N/A | N/A |
| 10545200 | ---                                                                       | N/A | N/A |
| 10545337 | Ppia                                                                      | N/A | N/A |
| 10545339 | Mrpl35                                                                    | N/A | N/A |
| 10545765 | Gapdh /// Gm16374 /// Gm2606 /// Gm4609 /// Gm3200 /// Gm2451 /// Gm10293 | N/A | N/A |
| 10545881 | Cml2                                                                      | N/A | N/A |
| 10546066 | Isy1                                                                      | N/A | N/A |
| 10546079 | Cnbp                                                                      | N/A | N/A |
| 10546702 | Tpt1 /// Tpt1p                                                            | N/A | N/A |
| 10546919 | Rpusd3                                                                    | N/A | N/A |
| 10547068 | Rpl32                                                                     | N/A | N/A |
| 10547073 | Snora7a                                                                   | N/A | N/A |
| 10547386 | Adipor2                                                                   | N/A | N/A |
| 10547638 | Rpl15 /// Gm4294                                                          | N/A | N/A |
| 10548143 | Gapdh /// Gm16374 /// Gm4609 /// Gm3200 /// Gm2451 /// Gm10293            | N/A | N/A |
| 10548600 | Hmgb1 /// Hmgb1l                                                          | N/A | N/A |
| 10548879 | Mgp                                                                       | N/A | N/A |
| 10549375 | Rps26 /// Gm6654                                                          | N/A | N/A |
| 10549582 | Tsen34                                                                    | N/A | N/A |
| 10549588 | Rps9                                                                      | N/A | N/A |
| 10549802 | Rps18 /// Gm5321 /// Gm10260                                              | N/A | N/A |
| 10550052 | Rps5                                                                      | N/A | N/A |
| 10551287 | Cyp2a12                                                                   | N/A | N/A |
| 10551347 | Blvrb                                                                     | N/A | N/A |
| 10551489 | Rps16 /// Rps16-ps2                                                       | N/A | N/A |
| 10551529 | LOC100503763                                                              | N/A | N/A |
| 10551760 | Zfp84                                                                     | N/A | N/A |
| 10551998 | ---                                                                       | N/A | N/A |
| 10552242 | Rpl17 /// Gm10268 /// Rpl17-ps3                                           | N/A | N/A |
| 10552343 | ---                                                                       | N/A | N/A |
| 10553475 | Rps27a                                                                    | N/A | N/A |
| 10553840 | Atp5l                                                                     | N/A | N/A |
| 10553857 | Hmgb1                                                                     | N/A | N/A |
| 10554005 | H47                                                                       | N/A | N/A |
| 10554701 | Hnrnpk                                                                    | N/A | N/A |
| 10555063 | Ints4                                                                     | N/A | N/A |
| 10555568 | Rpl31                                                                     | N/A | N/A |
| 10556206 | Snora3                                                                    | N/A | N/A |
| 10556244 | Snora23                                                                   | N/A | N/A |

|                |                                                                         |          |          |
|----------------|-------------------------------------------------------------------------|----------|----------|
| 10556571       | Rpl19                                                                   | N/A      | N/A      |
| 10556940       | Uqcr2 /// Pdzd9                                                         | N/A      | N/A      |
| 10557703       | Snora30                                                                 | N/A      | N/A      |
| 10558227       | Acadsb                                                                  | N/A      | N/A      |
| 10558687       | 1190003J15Rik                                                           | N/A      | N/A      |
| 10558903       | Taldo1                                                                  | N/A      | N/A      |
| 10559233       | Mrpl23                                                                  | N/A      | N/A      |
| 10560045       | Slc27a5                                                                 | N/A      | N/A      |
| 10560103       | Rps8                                                                    | N/A      | N/A      |
| 10560614       | Apoc4 /// Apoc2                                                         | N/A      | N/A      |
| 10560816       | Atp5g2                                                                  | N/A      | N/A      |
| 10561140       | Mrpl41                                                                  | N/A      | N/A      |
| 10561679       | Psmc8                                                                   | N/A      | N/A      |
| 10562096       | Tmem147                                                                 | N/A      | N/A      |
| 10562289       | Gm5329                                                                  | N/A      | N/A      |
| 10562663       | Rps4x                                                                   | N/A      | N/A      |
| 10562667       | ---                                                                     | N/A      | N/A      |
| 10563026       | Bcl2l12                                                                 | N/A      | N/A      |
| 10563099       | Snord35b                                                                | N/A      | N/A      |
| 10563114       | Rpl13a /// Snord32a                                                     | N/A      | N/A      |
| 10564563       | Rpl17 /// Gm10268 /// Rpl17-ps3                                         | N/A      | N/A      |
| 10564570       | ---                                                                     | N/A      | N/A      |
| 10564622       | ---                                                                     | N/A      | N/A      |
| 10564857       | Idh2                                                                    | N/A      | N/A      |
| 10565083       | Rps17 /// Gm6402                                                        | N/A      | N/A      |
| 10565434       | Rps13                                                                   | N/A      | N/A      |
| 10565530       | ---                                                                     | N/A      | N/A      |
| 10565570       | 4632434I1Rik                                                            | N/A      | N/A      |
| 10565589       | Hmgb1                                                                   | N/A      | N/A      |
| 10565813       | Snord15a                                                                | N/A      | N/A      |
| 10566142       | Hmgb1                                                                   | N/A      | N/A      |
| 10566477       | Hpx                                                                     | N/A      | N/A      |
| 10567106       | Rps4y2 /// Gm6816                                                       | N/A      | N/A      |
| 10568532       | Rpl7a /// Rpl7a-ps3 /// Rpl7a-ps5 /// Gm5619 /// Gm16477 /// Rpl7a-ps10 | N/A      | N/A      |
| 10578557       | Ccdc111 /// Mlf1ip                                                      | N/A      | N/A      |
| 10588026       | Rpl7a /// Rpl7a-ps3 /// Rpl7a-ps5 /// Gm5619 /// Gm16477 /// Rpl7a-ps10 | N/A      | N/A      |
| 10594907       | Rpl7a /// Rpl7a-ps3 /// Rpl7a-ps5 /// Gm5619 /// Gm16477 /// Rpl7a-ps10 | N/A      | N/A      |
| 10595441       | Rpl7a /// Rpl7a-ps3 /// Rpl7a-ps5 /// Gm5619 /// Gm16477 /// Rpl7a-ps10 | N/A      | N/A      |
| 10597515       | Rpl24                                                                   | N/A      | N/A      |
| 10600027       | Rpl30 /// Gm12191 /// Gm6570 /// Gm5481 /// Gm6109                      | N/A      | N/A      |
| 10606369       | Itm2a                                                                   | N/A      | N/A      |
|                |                                                                         |          |          |
| Liver Class VI |                                                                         |          |          |
| Probe ID       | Gene ID                                                                 | Con Peak | TSR Peak |
| 10344707       | Pcmdt1                                                                  | N/A      | 1        |
| 10344789       | Cspp1                                                                   | N/A      | 1        |
| 10344799       | Cspp1                                                                   | N/A      | 1        |
| 10344801       | Cspp1                                                                   | N/A      | 1        |
| 10344805       | Cspp1                                                                   | N/A      | 1        |
| 10344811       | Cspp1                                                                   | N/A      | 1        |
| 10344815       | Cspp1                                                                   | N/A      | 1        |
| 10344817       | Cspp1                                                                   | N/A      | 1        |
| 10344819       | Cspp1                                                                   | N/A      | 1        |
| 10344924       | Xkr9                                                                    | N/A      | 19       |
| 10344939       | Terf1                                                                   | N/A      | 1        |
| 10344952       | Rdh10                                                                   | N/A      | 13       |
| 10345025       | Iars                                                                    | N/A      | 19       |
| 10345089       |                                                                         | N/A      | 13       |
| 10345436       | LOC280487                                                               | N/A      | 7        |
| 10345546       | LOC100046859                                                            | N/A      | 1        |
| 10345928       |                                                                         | N/A      | 13       |
| 10345930       | Tpp2                                                                    | N/A      | 1        |
| 10345967       | Bivm                                                                    | N/A      | 1        |
| 10346222       | LOC280487                                                               | N/A      | 7        |
| 10346310       | Mobk13                                                                  | N/A      | 1        |
| 10346340       | 9430016H08Rik                                                           | N/A      | 13       |
| 10346374       | Aox1                                                                    | N/A      | 1        |
| 10346544       |                                                                         | N/A      | 13       |
| 10346551       | Cflar                                                                   | N/A      | 1        |
| 10346695       | Nbeal1                                                                  | N/A      | 1        |
| 10346722       | Nbeal1                                                                  | N/A      | 1        |
| 10346882       | Adam23                                                                  | N/A      | 13       |
| 10346970       | Pikfyve                                                                 | N/A      | 1        |
| 10347106       | Rpe                                                                     | N/A      | 1        |
| 10347297       | Arpc2                                                                   | N/A      | 13       |
| 10347417       | Bcs1l                                                                   | N/A      | 7        |
| 10347481       | Cyp27a1                                                                 | N/A      | 13       |
| 10347508       | Fam134a                                                                 | N/A      | 7        |
| 10347531       | Ankzf1                                                                  | N/A      | 1        |
| 10347552       | Stk16                                                                   | N/A      | 13       |
| 10347639       | Gmppa                                                                   | N/A      | 1        |
| 10347724       | Slc4a3                                                                  | N/A      | 13       |
| 10347779       | 9830004L10Rik                                                           | N/A      | 13       |
| 10347790       |                                                                         | N/A      | 13       |

|          |               |     |    |
|----------|---------------|-----|----|
| 10348004 | Psm1          | N/A | 1  |
| 10348201 | Gigyf2        | N/A | 1  |
| 10348632 | Twist2        | N/A | 19 |
| 10349016 | 2310035C23Rik | N/A | 1  |
| 10349249 | Clasp1        | N/A | 1  |
| 10349442 | Ccnt2         | N/A | 1  |
| 10349478 | Rpl28         | N/A | 7  |
| 10349826 | Gm10538       | N/A | 13 |
| 10350046 | Kdm5b         | N/A | 1  |
| 10350136 | Csrp1         | N/A | 7  |
| 10350341 |               | N/A | 13 |
| 10350590 | Fam33a        | N/A | 7  |
| 10350800 | Tor1aip2      | N/A | 13 |
| 10350923 | Rfwd2         | N/A | 1  |
| 10351035 | Gas5          | N/A | 1  |
| 10351037 | Gas5          | N/A | 1  |
| 10351390 | Tada1l        | N/A | 13 |
| 10351463 | Rgs5          | N/A | 13 |
| 10351487 | Nos1ap        | N/A | 19 |
| 10351489 | Gm7299        | N/A | 13 |
| 10351533 | Nr1i3         | N/A | 19 |
| 10351574 | Dedd          | N/A | 7  |
| 10351788 | Pigm          | N/A | 1  |
| 10351857 |               | N/A | 13 |
| 10352194 | Cdc42bpa      | N/A | 1  |
| 10352281 | Acbd3         | N/A | 1  |
| 10352320 | Tmem63a       | N/A | 19 |
| 10352514 | Eprs          | N/A | 1  |
| 10352562 | Gpatch2       | N/A | 1  |
| 10352777 | Slc30a1       | N/A | 19 |
| 10352914 | A330023F24Rik | N/A | 1  |
| 10352916 | C030002C11Rik | N/A | 1  |
| 10352918 | C030002C11Rik | N/A | 1  |
| 10353028 | Vcpip1        | N/A | 1  |
| 10353115 |               | N/A | 13 |
| 10353303 |               | N/A | 7  |
| 10353415 | Il17f         | N/A | 13 |
| 10353549 | Fam135a       | N/A | 1  |
| 10353989 |               | N/A | 1  |
| 10354203 |               | N/A | 1  |
| 10354307 | Txn1          | N/A | 13 |
| 10354368 |               | N/A | 13 |
| 10354432 | Myo1b         | N/A | 1  |
| 10354542 | Pms1          | N/A | 1  |
| 10354737 | Gm5147        | N/A | 7  |
| 10354765 | Gm7098        | N/A | 7  |
| 10354816 | Clk1          | N/A | 1  |
| 10355138 |               | N/A | 13 |
| 10355141 | Klf7          | N/A | 19 |
| 10355266 | Lancl1        | N/A | 13 |
| 10355534 | Tns1          | N/A | 19 |
| 10355742 | Abcb6         | N/A | 13 |
| 10355996 | Slc25a5       | N/A | 19 |
| 10356248 | C130026I21Rik | N/A | 13 |
| 10356278 | Sp110         | N/A | 13 |
| 10356423 | Usp40         | N/A | 1  |
| 10356512 | Iqca          | N/A | 13 |
| 10356762 | LOC280487     | N/A | 7  |
| 10356771 | Mterfd2       | N/A | 7  |
| 10356968 | Pam           | N/A | 13 |
| 10357001 |               | N/A | 13 |
| 10357008 | Pign          | N/A | 1  |
| 10357298 | LOC280487     | N/A | 7  |
| 10357773 | Mdm4          | N/A | 1  |
| 10357875 | Btg2          | N/A | 7  |
| 10357950 | Ppp1r12b      | N/A | 19 |
| 10357954 | Ppp1r12b      | N/A | 1  |
| 10358324 | Cfhr3         | N/A | 1  |
| 10358339 | Cfh           | N/A | 1  |
| 10358430 | Gm9931        | N/A | 13 |
| 10358533 | Hmcn1         | N/A | 19 |
| 10358591 | Hmcn1         | N/A | 1  |
| 10358613 | Hmcn1         | N/A | 13 |
| 10358627 | Hmcn1         | N/A | 13 |
| 10358631 | Hmcn1         | N/A | 19 |
| 10358658 | Hmcn1         | N/A | 19 |
| 10358668 | Hmcn1         | N/A | 1  |
| 10358677 | 1200016B10Rik | N/A | 1  |
| 10358757 | Smg7          | N/A | 1  |
| 10358982 | Mr1           | N/A | 19 |
| 10359078 |               | N/A | 1  |
| 10359086 |               | N/A | 1  |
| 10359097 | Tor1aip1      | N/A | 7  |
| 10359181 | Tor3a         | N/A | 19 |

|          |               |     |    |
|----------|---------------|-----|----|
| 10359375 | Gpr52         | N/A | 1  |
| 10359405 | Klh120        | N/A | 1  |
| 10359561 | Fmo4          | N/A | 19 |
| 10359642 | LOC280487     | N/A | 7  |
| 10359644 | Mettl11b      | N/A | 13 |
| 10359826 | Uqcr          | N/A | 7  |
| 10360076 | Ndufs2        | N/A | 7  |
| 10360130 | Nit1          | N/A | 7  |
| 10360443 | Fh1           | N/A | 13 |
| 10360479 | Cep170        | N/A | 1  |
| 10360542 | Fam36a        | N/A | 1  |
| 10360544 | Hnrnpu        | N/A | 1  |
| 10360804 | Gm10517       | N/A | 13 |
| 10360832 | 1700056E22Rik | N/A | 13 |
| 10360848 | Mosc2         | N/A | 13 |
| 10360884 | Iars2         | N/A | 1  |
| 10361023 | Prox1         | N/A | 1  |
| 10361078 | Tatdn3        | N/A | 19 |
| 10361091 | Atf3          | N/A | 13 |
| 10361682 | Ppil4         | N/A | 1  |
| 10361698 | Zc3h12d       | N/A | 7  |
| 10361765 |               | N/A | 13 |
| 10361977 | Gm6251        | N/A | 19 |
| 10362160 |               | N/A | 7  |
| 10362162 | Taar7d        | N/A | 13 |
| 10362387 |               | N/A | 19 |
| 10362462 | Trdn          | N/A | 7  |
| 10362487 | Tspyl1        | N/A | 1  |
| 10362520 | Hdac2         | N/A | 1  |
| 10362676 | Cdc2l6        | N/A | 7  |
| 10362837 | Sec63         | N/A | 1  |
| 10362876 | Pdss2         | N/A | 1  |
| 10363005 | LOC280487     | N/A | 7  |
| 10363007 | Ascc3         | N/A | 1  |
| 10363054 |               | N/A | 1  |
| 10363144 |               | N/A | 13 |
| 10363173 | Gja1          | N/A | 13 |
| 10363181 | Stard6        | N/A | 13 |
| 10363190 |               | N/A | 13 |
| 10363403 | Ascc1         | N/A | 13 |
| 10363561 | LOC280487     | N/A | 7  |
| 10363641 | Herc4         | N/A | 1  |
| 10363703 |               | N/A | 1  |
| 10363773 |               | N/A | 19 |
| 10364194 | Lss           | N/A | 19 |
| 10364675 | Gpx4          | N/A | 13 |
| 10364888 | Dot1l         | N/A | 13 |
| 10364909 | Oaz1          | N/A | 13 |
| 10365056 | Apba3         | N/A | 13 |
| 10365217 | Gm10776       | N/A | 1  |
| 10365225 | Gm4924        | N/A | 1  |
| 10365286 | Eid3          | N/A | 1  |
| 10365471 | Fbxo7         | N/A | 13 |
| 10365559 | Igf1          | N/A | 19 |
| 10365572 |               | N/A | 13 |
| 10365574 | Pmch          | N/A | 13 |
| 10365714 |               | N/A | 1  |
| 10365729 | Pctk2         | N/A | 1  |
| 10365933 | Eea1          | N/A | 1  |
| 10366043 | Dusp6         | N/A | 13 |
| 10366310 | Osbpl8        | N/A | 1  |
| 10366409 | Zfc3h1        | N/A | 1  |
| 10366512 |               | N/A | 1  |
| 10366519 | 5330438D12Rik | N/A | 19 |
| 10366649 | 4921513I03Rik | N/A | 19 |
| 10367050 | Rdh18         | N/A | 13 |
| 10367066 | Sdr9c7        | N/A | 1  |
| 10367120 |               | N/A | 1  |
| 10367252 | Usp52         | N/A | 1  |
| 10367335 |               | N/A | 13 |
| 10367479 | Olf1518       | N/A | 13 |
| 10367485 | Olf1780       | N/A | 13 |
| 10367746 | Sash1         | N/A | 7  |
| 10367803 |               | N/A | 1  |
| 10367843 | Utrn          | N/A | 1  |
| 10368064 | Ect2l         | N/A | 13 |
| 10368162 | Pex7          | N/A | 19 |
| 10368173 | 4933406P04Rik | N/A | 19 |
| 10368575 |               | N/A | 13 |
| 10368713 | Al317395      | N/A | 1  |
| 10368739 |               | N/A | 19 |
| 10368762 | Cdc40         | N/A | 1  |
| 10368990 |               | N/A | 13 |
| 10369116 | Mcm9          | N/A | 1  |



|          |               |     |    |
|----------|---------------|-----|----|
| 10369171 | 9530009G21Rik | N/A | 1  |
| 10369223 | Dux           | N/A | 13 |
| 10369225 | Dux           | N/A | 13 |
| 10369228 | Gm4981        | N/A | 7  |
| 10369661 | Ccar1         | N/A | 1  |
| 10369738 | Sirt1         | N/A | 1  |
| 10369833 | Slc16a9       | N/A | 13 |
| 10369885 | Cisd1         | N/A | 13 |
| 10370174 | A130042E20Rik | N/A | 13 |
| 10370544 | 2610008E11Rik | N/A | 1  |
| 10370559 | Mier2         | N/A | 13 |
| 10370610 | Polrmt        | N/A | 13 |
| 10370708 | Polr2e        | N/A | 13 |
| 10370833 | Uqcr          | N/A | 7  |
| 10370920 | Btbd2         | N/A | 7  |
| 10371277 | B230315N10Rik | N/A | 1  |
| 10371482 | Hsp90b1       | N/A | 1  |
| 10371616 | Chpt1         | N/A | 19 |
| 10371770 | Gas2l3        | N/A | 19 |
| 10371784 | Nr1h4         | N/A | 19 |
| 10371888 | Tmpo          | N/A | 1  |
| 10371904 | 1110012L19Rik | N/A | 13 |
| 10372028 | Plxnc1        | N/A | 13 |
| 10372082 | Nudt4         | N/A | 1  |
| 10372121 | Tmtc3         | N/A | 1  |
| 10372385 | Zdhhc17       | N/A | 1  |
| 10372441 |               | N/A | 13 |
| 10372497 | Thap2         | N/A | 1  |
| 10372534 | Cnot2         | N/A | 1  |
| 10372583 | Rab3ip        | N/A | 13 |
| 10372600 | Cct2          | N/A | 13 |
| 10372629 | Yeats4        | N/A | 7  |
| 10372668 | Mdm2          | N/A | 1  |
| 10372766 | Helb          | N/A | 19 |
| 10372831 | Tbc1d30       | N/A | 7  |
| 10373569 |               | N/A | 7  |
| 10373600 | Mettl7b       | N/A | 7  |
| 10373626 | Olfir796      | N/A | 13 |
| 10373702 | Pisd-ps1      | N/A | 19 |
| 10374032 |               | N/A | 13 |
| 10374035 | Xbp1          | N/A | 7  |
| 10374183 | Gm4638        | N/A | 7  |
| 10374185 | Ccm2          | N/A | 13 |
| 10374348 | Eef2          | N/A | 13 |
| 10374350 |               | N/A | 19 |
| 10374352 | Gm4638        | N/A | 7  |
| 10374354 |               | N/A | 13 |
| 10374364 | Akt2          | N/A | 7  |
| 10374485 | Peli1         | N/A | 1  |
| 10374551 |               | N/A | 13 |
| 10374560 | Zrsr1         | N/A | 1  |
| 10374621 | Usp34         | N/A | 1  |
| 10374821 | Smek2         | N/A | 1  |
| 10375051 | Hba-a1        | N/A | 1  |
| 10375058 | Hba-a1        | N/A | 1  |
| 10375324 | LOC280487     | N/A | 7  |
| 10375501 |               | N/A | 1  |
| 10375547 | Olfir10       | N/A | 7  |
| 10375574 | Olfir1373     | N/A | 13 |
| 10375578 | Flt4          | N/A | 13 |
| 10375704 | 3010026O09Rik | N/A | 7  |
| 10375713 | Mgat4b        | N/A | 13 |
| 10375735 | Hnrnp1        | N/A | 1  |
| 10375791 | Olfir51       | N/A | 13 |
| 10375880 | Nhp2          | N/A | 13 |
| 10375941 | Vdac1         | N/A | 13 |
| 10376324 | Gm12250       | N/A | 7  |
| 10376358 | Sh3bp5l       | N/A | 13 |
| 10376425 | Gm12258       | N/A | 1  |
| 10376474 | Mrpl55        | N/A | 7  |
| 10376864 | Ubb           | N/A | 7  |
| 10377416 | 2310047M10Rik | N/A | 13 |
| 10377550 |               | N/A | 1  |
| 10377790 | Slc16a11      | N/A | 7  |
| 10378013 | Rpain         | N/A | 13 |
| 10378334 | Tax1bp3       | N/A | 13 |
| 10378429 | Olfir402      | N/A | 13 |
| 10378547 |               | N/A | 13 |
| 10378572 | Tlcd2         | N/A | 19 |
| 10378785 | Bhlha9        | N/A | 13 |
| 10378802 | Blmh          | N/A | 13 |
| 10379068 | Sdf2          | N/A | 13 |
| 10379215 | Ift20         | N/A | 1  |
| 10380116 | Rnf43         | N/A | 1  |

|          |               |     |    |
|----------|---------------|-----|----|
| 10380129 | Supt4h1       | N/A | 13 |
| 10380549 |               | N/A | 1  |
| 10380558 |               | N/A | 1  |
| 10380689 | Cbx1          | N/A | 13 |
| 10380719 | Sp6           | N/A | 13 |
| 10380871 | Stard3        | N/A | 13 |
| 10381226 | Coasy         | N/A | 13 |
| 10381387 | G6pc          | N/A | 1  |
| 10381408 | Ifi35         | N/A | 13 |
| 10381526 | Ppih          | N/A | 13 |
| 10381588 | Grn           | N/A | 13 |
| 10381934 | Tanc2         | N/A | 1  |
| 10382049 | Ddx42         | N/A | 1  |
| 10382069 | Psmc5         | N/A | 13 |
| 10382257 | Amz2          | N/A | 13 |
| 10382435 | Gprc5c        | N/A | 7  |
| 10382516 | Kctd2         | N/A | 13 |
| 10382565 | Mrps7         | N/A | 13 |
| 10382795 | Gm11741       | N/A | 13 |
| 10383010 | Socs3         | N/A | 13 |
| 10383194 |               | N/A | 13 |
| 10383289 | Baiap2        | N/A | 19 |
| 10383409 | Gcgr          | N/A | 13 |
| 10383564 | Fn3k          | N/A | 7  |
| 10384145 | H2afv         | N/A | 7  |
| 10384448 | Sec61g        | N/A | 1  |
| 10384486 | Etaa1         | N/A | 7  |
| 10384504 | Meis1         | N/A | 1  |
| 10384566 |               | N/A | 1  |
| 10384579 | Ugp2          | N/A | 7  |
| 10384715 | LOC100134990  | N/A | 1  |
| 10384737 | Papolg        | N/A | 1  |
| 10384795 | Cyb5d1        | N/A | 7  |
| 10385239 | Mat2b         | N/A | 7  |
| 10385271 | Ccng1         | N/A | 1  |
| 10385477 |               | N/A | 7  |
| 10385616 | Rufy1         | N/A | 1  |
| 10386070 | Atox1         | N/A | 13 |
| 10386095 | Fam114a2      | N/A | 1  |
| 10386123 |               | N/A | 7  |
| 10386169 | Gm9900        | N/A | 1  |
| 10386551 | Flii          | N/A | 7  |
| 10386582 | Top3a         | N/A | 7  |
| 10386604 | Shmt1         | N/A | 19 |
| 10386652 | Alh3a2        | N/A | 19 |
| 10386683 | Slc47a1       | N/A | 1  |
| 10386743 | Epn2          | N/A | 13 |
| 10386992 | 1700086D15Rik | N/A | 13 |
| 10387111 | 2310004I24Rik | N/A | 1  |
| 10387363 | Cyb5d1        | N/A | 13 |
| 10387514 |               | N/A | 13 |
| 10387659 | Nlgn2         | N/A | 13 |
| 10387768 | Acadvl        | N/A | 13 |
| 10388033 | Derl2         | N/A | 1  |
| 10388278 |               | N/A | 13 |
| 10388286 | Olfr391       | N/A | 13 |
| 10388613 | Ccdc55        | N/A | 1  |
| 10388718 | Pipox         | N/A | 1  |
| 10389010 | 5730455P16Rik | N/A | 1  |
| 10389070 |               | N/A | 1  |
| 10389245 | Tada2l        | N/A | 1  |
| 10389308 | Ggnbp2        | N/A | 1  |
| 10389522 |               | N/A | 7  |
| 10389524 |               | N/A | 1  |
| 10389717 |               | N/A | 7  |
| 10389882 | 3300001P08Rik | N/A | 1  |
| 10390473 | Pip4k2b       | N/A | 19 |
| 10391277 | Ghdc          | N/A | 1  |
| 10391407 | Ccdc56        | N/A | 13 |
| 10391732 | Gpatch8       | N/A | 7  |
| 10391744 | Gpatch8       | N/A | 1  |
| 10392012 | Cdc27         | N/A | 1  |
| 10392183 | Ern1          | N/A | 1  |
| 10392221 | Pecam1        | N/A | 7  |
| 10392297 | Memo1         | N/A | 13 |
| 10392449 | Wipi1         | N/A | 7  |
| 10393395 | Sfrs2         | N/A | 19 |
| 10393569 | RP23-394O9.3  | N/A | 13 |
| 10393642 | Eif4a3        | N/A | 13 |
| 10393877 | Mafg          | N/A | 7  |
| 10394040 | Csnk1d        | N/A | 13 |
| 10394080 |               | N/A | 1  |
| 10394344 |               | N/A | 19 |
| 10394366 | Atad2b        | N/A | 1  |

|          |               |     |    |
|----------|---------------|-----|----|
| 10394392 | Nfyc          | N/A | 19 |
| 10394394 | Apob          | N/A | 19 |
| 10394527 | Ttc32         | N/A | 7  |
| 10394611 | Nbas          | N/A | 1  |
| 10394674 | Socs2         | N/A | 7  |
| 10394731 | Taf1d         | N/A | 19 |
| 10394819 |               | N/A | 13 |
| 10394821 |               | N/A | 13 |
| 10394922 | Gm6950        | N/A | 1  |
| 10394926 |               | N/A | 13 |
| 10395275 | LOC280487     | N/A | 7  |
| 10395414 | Tmem195       | N/A | 19 |
| 10395520 | lmp2l         | N/A | 19 |
| 10395628 | Scfd1         | N/A | 19 |
| 10395682 | Gm5785        | N/A | 1  |
| 10395692 | Arhgap5       | N/A | 1  |
| 10395739 | Srp54b        | N/A | 1  |
| 10395788 | Srp54a        | N/A | 1  |
| 10395910 | Pnn           | N/A | 1  |
| 10396008 | Prpf39        | N/A | 1  |
| 10396121 | 4930512B01Rik | N/A | 13 |
| 10396205 |               | N/A | 1  |
| 10396383 | Slc38a6       | N/A | 1  |
| 10396485 | Syne2         | N/A | 1  |
| 10396608 | Syne2         | N/A | 1  |
| 10397153 | Acot4         | N/A | 19 |
| 10397216 | Coq6          | N/A | 13 |
| 10397428 | 1700020O03Rik | N/A | 19 |
| 10397543 | EG435337      | N/A | 1  |
| 10397642 |               | N/A | 13 |
| 10397683 | Ttc8          | N/A | 7  |
| 10398315 |               | N/A | 13 |
| 10398374 | AF357341      | N/A | 13 |
| 10398430 |               | N/A | 19 |
| 10398483 | Dync1h1       | N/A | 13 |
| 10398721 | 2810002N01Rik | N/A | 1  |
| 10398727 | Klc1          | N/A | 19 |
| 10398812 |               | N/A | 13 |
| 10399005 | Crip1         | N/A | 7  |
| 10399038 | Zfp386        | N/A | 19 |
| 10399061 | Esy2          | N/A | 19 |
| 10399389 | 1700034J04Rik | N/A | 13 |
| 10399636 | Mrto4         | N/A | 13 |
| 10399642 |               | N/A | 13 |
| 10400143 | Stxbp6        | N/A | 1  |
| 10400357 | Baz1a         | N/A | 1  |
| 10400413 | Garnl1        | N/A | 1  |
| 10400460 | Mbip          | N/A | 1  |
| 10400483 | Slc25a21      | N/A | 1  |
| 10400510 | Clec14a       | N/A | 1  |
| 10400639 | Rpl36al       | N/A | 13 |
| 10400668 | Sdccag1       | N/A | 1  |
| 10400710 | Gm71          | N/A | 1  |
| 10400762 | Map4k5        | N/A | 1  |
| 10401028 | Sgpp1         | N/A | 1  |
| 10401063 | Zbtb25        | N/A | 1  |
| 10401309 | Synj2bp       | N/A | 1  |
| 10401317 | Gm4787        | N/A | 1  |
| 10401320 | Adam4         | N/A | 1  |
| 10401322 | Synj2bp       | N/A | 1  |
| 10401441 |               | N/A | 13 |
| 10401795 | Alkbh1        | N/A | 1  |
| 10401824 | Oog1          | N/A | 13 |
| 10401829 | EG435337      | N/A | 1  |
| 10402195 | Tc2n          | N/A | 1  |
| 10402225 | Trip11        | N/A | 1  |
| 10402435 | Serpina3c     | N/A | 13 |
| 10402997 | LOC630837     | N/A | 13 |
| 10403015 |               | N/A | 7  |
| 10403018 |               | N/A | 13 |
| 10403021 |               | N/A | 13 |
| 10403034 |               | N/A | 13 |
| 10403043 |               | N/A | 13 |
| 10403048 |               | N/A | 13 |
| 10403054 |               | N/A | 13 |
| 10403060 |               | N/A | 13 |
| 10403079 |               | N/A | 7  |
| 10403246 | Gm8598        | N/A | 13 |
| 10403258 | Gdi2          | N/A | 1  |
| 10403348 | Gm5444        | N/A | 13 |
| 10403604 | Lyst          | N/A | 19 |
| 10403680 | Arid4b        | N/A | 1  |
| 10403743 | Inhba         | N/A | 1  |
| 10403754 | Bat4          | N/A | 7  |

|          |                |     |    |
|----------|----------------|-----|----|
| 10403756 | 1600012F09Rik  | N/A | 1  |
| 10403765 | Vps41          | N/A | 1  |
| 10403842 | Elmo1          | N/A | 1  |
| 10403917 | Olf1367        | N/A | 13 |
| 10403982 | V1rh17         | N/A | 13 |
| 10404020 |                | N/A | 13 |
| 10404022 |                | N/A | 13 |
| 10404024 | Hist1h4h       | N/A | 13 |
| 10404026 | Hist1h2af      | N/A | 13 |
| 10404113 | Slc17a1        | N/A | 19 |
| 10404127 | Hist1h2aa      | N/A | 7  |
| 10404538 | Prpf4b         | N/A | 1  |
| 10404630 | Riok1          | N/A | 1  |
| 10404763 | Tmem170b       | N/A | 1  |
| 10404848 | Jarid2         | N/A | 1  |
| 10404895 | 503343015Rik   | N/A | 13 |
| 10405094 | lars           | N/A | 1  |
| 10405291 | Faf2           | N/A | 1  |
| 10405400 | Nsd1           | N/A | 1  |
| 10405619 | 5133401N09Rik  | N/A | 13 |
| 10405725 |                | N/A | 13 |
| 10405727 | 2410127L17Rik  | N/A | 19 |
| 10405785 | 0610007P08Rik  | N/A | 1  |
| 10405847 |                | N/A | 19 |
| 10405870 |                | N/A | 13 |
| 10405876 | Gm10324        | N/A | 13 |
| 10405916 | A530054K11Rik  | N/A | 1  |
| 10405938 | Zfp273         | N/A | 1  |
| 10406067 | Clptm1l        | N/A | 13 |
| 10406111 | Slc12a7        | N/A | 19 |
| 10406193 | Ccdc127        | N/A | 1  |
| 10406205 | Erap1          | N/A | 19 |
| 10406270 | Glrx           | N/A | 19 |
| 10406399 | Pou5f2         | N/A | 1  |
| 10406419 | Lysmd3         | N/A | 1  |
| 10406466 | Tmem161b       | N/A | 1  |
| 10406501 |                | N/A | 19 |
| 10406546 |                | N/A | 13 |
| 10406710 | Tbca           | N/A | 13 |
| 10406905 | Ccdc125        | N/A | 1  |
| 10406953 | Trim23         | N/A | 1  |
| 10407042 | Dimt1          | N/A | 1  |
| 10407122 |                | N/A | 19 |
| 10407281 | Esm1           | N/A | 13 |
| 10407291 | Arl15          | N/A | 1  |
| 10407392 | BC016423       | N/A | 1  |
| 10407916 | 1600012F09Rik  | N/A | 1  |
| 10407924 | Bat4           | N/A | 7  |
| 10408010 | Zkscan3        | N/A | 1  |
| 10408049 | Zfp192         | N/A | 1  |
| 10408062 | Olf1362        | N/A | 7  |
| 10408072 | Hist1h2ao      | N/A | 13 |
| 10408085 | Hist1h2an      | N/A | 13 |
| 10408094 | RP23-480B19.10 | N/A | 13 |
| 10408280 | Lrrc16a        | N/A | 19 |
| 10408329 | Taf1d          | N/A | 19 |
| 10408331 | Acot13         | N/A | 19 |
| 10408346 | Gm9983         | N/A | 1  |
| 10408523 | Foxq1          | N/A | 7  |
| 10408574 |                | N/A | 13 |
| 10408935 | Gm10786        | N/A | 1  |
| 10408937 | Atxn1          | N/A | 1  |
| 10409021 | Tpmt           | N/A | 1  |
| 10409061 |                | N/A | 1  |
| 10409539 |                | N/A | 19 |
| 10409545 |                | N/A | 13 |
| 10409970 | 8430426H19Rik  | N/A | 1  |
| 10410039 | Ptch1          | N/A | 7  |
| 10410078 | Slc35d2        | N/A | 19 |
| 10410099 | Cdc14b         | N/A | 7  |
| 10410115 | 1110018J18Rik  | N/A | 7  |
| 10410211 |                | N/A | 13 |
| 10410264 | Mterfd1        | N/A | 1  |
| 10410295 | Zfp595         | N/A | 1  |
| 10410317 | Zfp459         | N/A | 13 |
| 10410351 | AA987161       | N/A | 1  |
| 10410355 | A530054K11Rik  | N/A | 1  |
| 10410362 | 6720487G11Rik  | N/A | 1  |
| 10410370 | Zfp71-rs1      | N/A | 1  |
| 10410465 | BC018507       | N/A | 13 |
| 10410650 | Zfp825         | N/A | 1  |
| 10410656 | Cast           | N/A | 13 |
| 10410889 |                | N/A | 13 |
| 10410892 | Rasa1          | N/A | 1  |

|          |                 |     |    |
|----------|-----------------|-----|----|
| 10410927 | LOC280487       | N/A | 7  |
| 10411126 | Jmy             | N/A | 1  |
| 10411229 | F2r             | N/A | 1  |
| 10411306 | Polk            | N/A | 1  |
| 10411464 | Fcho2           | N/A | 1  |
| 10411646 | Gtf2h2          | N/A | 1  |
| 10411839 | Sfrs12          | N/A | 1  |
| 10411915 | Ppwd1           | N/A | 1  |
| 10411945 | Fam159b         | N/A | 13 |
| 10412082 | Gpbp1           | N/A | 1  |
| 10412258 |                 | N/A | 1  |
| 10412481 | 2410127L17Rik   | N/A | 19 |
| 10412491 |                 | N/A | 13 |
| 10412517 | Gm10021         | N/A | 13 |
| 10412537 | B930046C15Rik   | N/A | 13 |
| 10412543 | Gm5458          | N/A | 13 |
| 10412549 | D830030K20Rik   | N/A | 13 |
| 10412699 | Gm10404         | N/A | 1  |
| 10412755 | Gm8471          | N/A | 7  |
| 10412882 | Thrb            | N/A | 7  |
| 10412981 | Sec24c          | N/A | 1  |
| 10413086 | Adk             | N/A | 1  |
| 10413216 | 4931406H21Rik   | N/A | 19 |
| 10413434 | D14Abb1e        | N/A | 1  |
| 10413492 | Lrtm1           | N/A | 19 |
| 10413670 | Pbrm1           | N/A | 1  |
| 10413710 |                 | N/A | 13 |
| 10413771 | Capn7           | N/A | 1  |
| 10413897 | Ercc6           | N/A | 1  |
| 10413993 | Gm626           | N/A | 13 |
| 10414093 | Glud1           | N/A | 1  |
| 10414218 | 4930503E14Rik   | N/A | 13 |
| 10414241 |                 | N/A | 13 |
| 10414313 |                 | N/A | 7  |
| 10414355 | Mapk1ip1l       | N/A | 1  |
| 10414460 | Nat12           | N/A | 1  |
| 10414706 |                 | N/A | 13 |
| 10414726 |                 | N/A | 13 |
| 10415119 | Pabpn1          | N/A | 19 |
| 10415262 | Dcaf11          | N/A | 13 |
| 10415377 | 2610027L16Rik   | N/A | 13 |
| 10415576 | Zmym2           | N/A | 1  |
| 10415952 |                 | N/A | 1  |
| 10416057 | Clu             | N/A | 13 |
| 10416584 | Gm4821          | N/A | 7  |
| 10416657 | Elf1            | N/A | 1  |
| 10416696 | Gm4638          | N/A | 7  |
| 10416698 | Gm4638          | N/A | 7  |
| 10416725 | LOC630896       | N/A | 13 |
| 10416989 | Gpr180          | N/A | 13 |
| 10417183 | Pcca            | N/A | 1  |
| 10417235 | Gm3264          | N/A | 13 |
| 10417258 | 544988,00000000 | N/A | 13 |
| 10417264 | 544988,00000000 | N/A | 13 |
| 10417281 |                 | N/A | 13 |
| 10417302 | 544988,00000000 | N/A | 13 |
| 10417315 | Hn1l            | N/A | 13 |
| 10417319 | D830030K20Rik   | N/A | 13 |
| 10417359 | Gm3264          | N/A | 13 |
| 10417371 | 4930555G01Rik   | N/A | 13 |
| 10417415 | Gm5458          | N/A | 13 |
| 10417446 | 4930555G01Rik   | N/A | 13 |
| 10417452 | 4930555G01Rik   | N/A | 13 |
| 10417492 |                 | N/A | 13 |
| 10417504 | 1700001E04Rik   | N/A | 13 |
| 10417708 | Oxsm            | N/A | 1  |
| 10417773 |                 | N/A | 13 |
| 10418218 | Slmap           | N/A | 1  |
| 10418796 | Dph3            | N/A | 13 |
| 10418879 | Mapk8           | N/A | 1  |
| 10418901 | Gprin2          | N/A | 19 |
| 10418927 | Bmpr1a          | N/A | 1  |
| 10419108 |                 | N/A | 13 |
| 10419111 | Gm10375         | N/A | 13 |
| 10419119 | Gm8020          | N/A | 13 |
| 10419128 | Gm10375         | N/A | 13 |
| 10419132 | Gm10375         | N/A | 13 |
| 10419147 | Gm10375         | N/A | 13 |
| 10419156 | Ear10           | N/A | 13 |
| 10419162 |                 | N/A | 13 |
| 10419343 | D14Ert436e      | N/A | 7  |
| 10419354 |                 | N/A | 7  |
| 10419638 | Chd8            | N/A | 1  |
| 10419742 | Olf49           | N/A | 13 |

|          |               |     |    |
|----------|---------------|-----|----|
| 10419779 | Haus4         | N/A | 13 |
| 10419810 | Psmb5         | N/A | 13 |
| 10420503 | Setdb2        | N/A | 1  |
| 10420637 | Kpna3         | N/A | 19 |
| 10421361 | Bmp1          | N/A | 19 |
| 10421486 | F630201L12Rik | N/A | 13 |
| 10421488 | Fndc3a        | N/A | 1  |
| 10421581 | Lrch1         | N/A | 7  |
| 10421648 | Slc25a30      | N/A | 7  |
| 10421661 | Gtf2f2        | N/A | 1  |
| 10421758 |               | N/A | 1  |
| 10421768 | Akap11        | N/A | 1  |
| 10421922 |               | N/A | 13 |
| 10421981 | Dis3          | N/A | 1  |
| 10422022 | Gm10843       | N/A | 19 |
| 10422075 | Mycbp2        | N/A | 1  |
| 10422247 | LOC280487     | N/A | 7  |
| 10422259 | Tgds          | N/A | 13 |
| 10422760 | Fyb           | N/A | 1  |
| 10422781 | Rictor        | N/A | 1  |
| 10422854 | Nup155        | N/A | 1  |
| 10422892 | 2410089E03Rik | N/A | 1  |
| 10423053 | Agxt2         | N/A | 1  |
| 10423577 | Mtdh          | N/A | 1  |
| 10423663 | Vps13b        | N/A | 1  |
| 10423731 |               | N/A | 1  |
| 10423825 | Fzd6          | N/A | 7  |
| 10423917 |               | N/A | 13 |
| 10424126 | Gm9920        | N/A | 1  |
| 10424211 | Gm10370       | N/A | 13 |
| 10424252 | Wdyhv1        | N/A | 7  |
| 10424377 | Gm4638        | N/A | 7  |
| 10424485 | Phf20l1       | N/A | 1  |
| 10424894 | Heatr7a       | N/A | 13 |
| 10425263 | Gm10864       | N/A | 19 |
| 10425335 | Syng1         | N/A | 13 |
| 10425651 | 4930407110Rik | N/A | 13 |
| 10426079 |               | N/A | 13 |
| 10426225 | Ncaph2        | N/A | 13 |
| 10426292 | Alg10b        | N/A | 1  |
| 10426298 |               | N/A | 13 |
| 10426477 | Snrpc         | N/A | 7  |
| 10426507 | 1700124K17Rik | N/A | 1  |
| 10426891 | Mettl7a1      | N/A | 13 |
| 10426909 | Letmd1        | N/A | 19 |
| 10427255 | Tarbp2        | N/A | 13 |
| 10427389 | LOC280487     | N/A | 7  |
| 10427428 | AW549877      | N/A | 1  |
| 10427538 | Nipbl         | N/A | 1  |
| 10427659 |               | N/A | 13 |
| 10428018 | Ube2v2        | N/A | 1  |
| 10428192 | Pabpc1        | N/A | 1  |
| 10428368 |               | N/A | 7  |
| 10428554 | Eif3h         | N/A | 13 |
| 10428579 | Ext1          | N/A | 1  |
| 10428744 | 9130401M01Rik | N/A | 13 |
| 10428827 | Tmem65        | N/A | 1  |
| 10429081 | Snrpc         | N/A | 7  |
| 10429197 |               | N/A | 13 |
| 10429385 |               | N/A | 1  |
| 10429754 | Nrbp2         | N/A | 19 |
| 10429968 |               | N/A | 1  |
| 10430145 | Rbm9          | N/A | 19 |
| 10430489 | Pla2g6        | N/A | 13 |
| 10430536 | Ddx17         | N/A | 1  |
| 10430593 | Josd1         | N/A | 13 |
| 10430679 |               | N/A | 1  |
| 10430711 | Slc25a17      | N/A | 19 |
| 10430725 | St13          | N/A | 13 |
| 10430846 | Ndufa6        | N/A | 7  |
| 10430866 | Cyp2d10       | N/A | 13 |
| 10430883 | Cyp2d13       | N/A | 1  |
| 10430892 | Pcdhb11       | N/A | 19 |
| 10430929 | Tbrg3         | N/A | 1  |
| 10431284 | Brd1          | N/A | 13 |
| 10431300 | Alg12         | N/A | 1  |
| 10431912 | Rpl36         | N/A | 13 |
| 10432152 | Olf1284       | N/A | 13 |
| 10432281 | Prkag1        | N/A | 13 |
| 10432573 | Slc11a2       | N/A | 1  |
| 10432986 | Aaas          | N/A | 7  |
| 10433214 | Zfp174        | N/A | 1  |
| 10433228 | Cluap1        | N/A | 19 |
| 10433352 | Ubn1          | N/A | 1  |

|          |               |     |    |
|----------|---------------|-----|----|
| 10433389 | Alg1          | N/A | 13 |
| 10433428 |               | N/A | 1  |
| 10433573 |               | N/A | 1  |
| 10433797 | Prkdc         | N/A | 1  |
| 10433887 | Pkp2          | N/A | 19 |
| 10433929 | Ppm1f         | N/A | 13 |
| 10434302 | Klh24         | N/A | 7  |
| 10434348 | Eif2b5        | N/A | 13 |
| 10434467 | Psmc2         | N/A | 13 |
| 10434741 |               | N/A | 1  |
| 10434745 |               | N/A | 1  |
| 10434888 | Opa1          | N/A | 1  |
| 10435237 | Zfp148        | N/A | 1  |
| 10435453 |               | N/A | 13 |
| 10435470 | Kpna1         | N/A | 1  |
| 10435565 | Hcls1         | N/A | 13 |
| 10435641 | Fstl1         | N/A | 7  |
| 10435693 | Cox17         | N/A | 7  |
| 10435789 | Zbtb20        | N/A | 1  |
| 10435802 | 2610015P09Rik | N/A | 1  |
| 10436498 | 4933411O13Rik | N/A | 13 |
| 10436590 | 2810055G20Rik | N/A | 1  |
| 10436594 |               | N/A | 1  |
| 10436596 | 2810055G20Rik | N/A | 19 |
| 10436598 | 2810055G20Rik | N/A | 1  |
| 10436602 |               | N/A | 1  |
| 10436636 | Ncam2         | N/A | 1  |
| 10436658 | 7120432I05Rik | N/A | 19 |
| 10436773 |               | N/A | 13 |
| 10436775 | 1110057P08Rik | N/A | 19 |
| 10436802 |               | N/A | 19 |
| 10436841 | Il10rb        | N/A | 7  |
| 10437195 | Igsf5         | N/A | 19 |
| 10437270 | Cluap1        | N/A | 13 |
| 10437392 | Magmas        | N/A | 7  |
| 10437561 | Fam86         | N/A | 1  |
| 10437590 | Carhsp1       | N/A | 13 |
| 10438109 | Ube2l3        | N/A | 13 |
| 10438169 |               | N/A | 1  |
| 10438672 | Tbccd1        | N/A | 1  |
| 10438708 | Masp1         | N/A | 1  |
| 10438726 | Abce1         | N/A | 1  |
| 10438738 | Bcl6          | N/A | 19 |
| 10438749 |               | N/A | 7  |
| 10438753 | Leprel1       | N/A | 1  |
| 10438815 | 1600021P15Rik | N/A | 7  |
| 10439018 | 0610012G03Rik | N/A | 13 |
| 10439218 | Pdia5         | N/A | 13 |
| 10439520 | Gm10809       | N/A | 13 |
| 10439547 | Gramd1c       | N/A | 1  |
| 10439710 | Phldb2        | N/A | 1  |
| 10439732 | Phldb2        | N/A | 1  |
| 10439766 | Pvrl3         | N/A | 7  |
| 10439788 |               | N/A | 13 |
| 10439989 |               | N/A | 7  |
| 10440050 | Tbc1d23       | N/A | 1  |
| 10440149 | Olfrl86       | N/A | 13 |
| 10440164 | Olfrl94       | N/A | 13 |
| 10440288 | Zfp654        | N/A | 1  |
| 10440292 | Gm5488        | N/A | 1  |
| 10440307 | Chmp2b        | N/A | 7  |
| 10440425 |               | N/A | 13 |
| 10440463 | LOC436427     | N/A | 13 |
| 10440471 | Mrpl39        | N/A | 13 |
| 10440491 | App           | N/A | 13 |
| 10440534 | Adamts5       | N/A | 1  |
| 10440564 | Rnf160        | N/A | 1  |
| 10440593 | Rwdd2b        | N/A | 7  |
| 10440881 | 1810007M14Rik | N/A | 1  |
| 10440926 | Dnajc28       | N/A | 1  |
| 10441344 | Rbm16         | N/A | 1  |
| 10441394 |               | N/A | 13 |
| 10441933 | Gm3435        | N/A | 19 |
| 10441952 | 2210404J11Rik | N/A | 19 |
| 10441973 | Tbp           | N/A | 1  |
| 10442087 | 4930546H06Rik | N/A | 19 |
| 10442104 | Fpr-rs4       | N/A | 13 |
| 10442206 | Zfp51         | N/A | 1  |
| 10442231 |               | N/A | 1  |
| 10442236 | 3110052M02Rik | N/A | 19 |
| 10442238 |               | N/A | 1  |
| 10442250 | Zfp229        | N/A | 1  |
| 10442258 | 4930432O21Rik | N/A | 1  |
| 10442262 | Zfp758        | N/A | 1  |

|          |               |     |    |
|----------|---------------|-----|----|
| 10442270 | 1300003B13Rik | N/A | 1  |
| 10442292 | Vmn2r113      | N/A | 13 |
| 10442893 | Wdr24         | N/A | 13 |
| 10442948 | Mrpl28        | N/A | 13 |
| 10443199 | C130040N14Rik | N/A | 13 |
| 10443244 | Anks1         | N/A | 7  |
| 10443817 | Pknx1         | N/A | 7  |
| 10444595 | Lsm2          | N/A | 7  |
| 10444717 | D17H6S53E     | N/A | 13 |
| 10444936 | Dhx16         | N/A | 13 |
| 10445141 | Olf111        | N/A | 13 |
| 10445183 | Olf136        | N/A | 13 |
| 10445251 | Gpr110        | N/A | 7  |
| 10445434 | Mrps18a       | N/A | 7  |
| 10445729 | Tcfcb         | N/A | 13 |
| 10445826 | Mocs1         | N/A | 19 |
| 10445898 | Rab5a         | N/A | 7  |
| 10446341 | 4930505H01Rik | N/A | 13 |
| 10446425 |               | N/A | 13 |
| 10446833 | Birc6         | N/A | 1  |
| 10447004 | Hdac1         | N/A | 13 |
| 10447056 | Qpct          | N/A | 13 |
| 10447065 | Fam82a1       | N/A | 1  |
| 10447079 | 4921513D11Rik | N/A | 19 |
| 10447100 | Dhx57         | N/A | 13 |
| 10447120 | Tmem178       | N/A | 13 |
| 10447141 | Eml4          | N/A | 1  |
| 10447254 | Ppm1b         | N/A | 1  |
| 10447513 |               | N/A | 1  |
| 10447551 | 5730437N04Rik | N/A | 7  |
| 10447589 | Fbl           | N/A | 13 |
| 10447594 | Dynlt1        | N/A | 13 |
| 10447629 | Tagap1        | N/A | 1  |
| 10447702 | Ppih          | N/A | 13 |
| 10447880 | Mrpl18        | N/A | 1  |
| 10448089 | Oaz1          | N/A | 13 |
| 10448127 | Ncaph2        | N/A | 13 |
| 10448214 | 6330416L07Rik | N/A | 1  |
| 10448230 | LOC280487     | N/A | 7  |
| 10448416 | Kctd5         | N/A | 13 |
| 10448755 | Eme2          | N/A | 13 |
| 10449142 | 9530058B02Rik | N/A | 13 |
| 10449266 | Itfg3         | N/A | 13 |
| 10449363 | Nudt3         | N/A | 13 |
| 10449527 | Stk38         | N/A | 19 |
| 10449631 | Btd9          | N/A | 1  |
| 10450089 | Ring1         | N/A | 7  |
| 10450444 | Apom          | N/A | 13 |
| 10450646 | Rbx1          | N/A | 13 |
| 10450648 | Abcf1         | N/A | 13 |
| 10450856 | Olf92         | N/A | 19 |
| 10450858 | Olf93         | N/A | 13 |
| 10450876 | Olf102        | N/A | 19 |
| 10451193 | E030047D23Rik | N/A | 1  |
| 10451198 | Vegfa         | N/A | 19 |
| 10451220 | Mad2l1bp      | N/A | 13 |
| 10451238 | Polr1c        | N/A | 13 |
| 10451451 | Gnmt          | N/A | 7  |
| 10451736 | Tbc1d5        | N/A | 1  |
| 10451856 | Vmn2r118      | N/A | 13 |
| 10451860 | Pot1b         | N/A | 1  |
| 10452110 | 2410015M20Rik | N/A | 13 |
| 10452118 | Lonp1         | N/A | 13 |
| 10452213 | Gtf2f1        | N/A | 1  |
| 10452404 | Nudt12        | N/A | 1  |
| 10452470 | Vapa          | N/A | 7  |
| 10452701 | Smchd1        | N/A | 1  |
| 10452907 | Fez2          | N/A | 13 |
| 10453102 | Sfrs7         | N/A | 1  |
| 10453141 | Sos1          | N/A | 1  |
| 10453602 |               | N/A | 13 |
| 10453632 | Rpl7a         | N/A | 7  |
| 10453676 |               | N/A | 1  |
| 10453678 | Zeb1          | N/A | 1  |
| 10453692 | Vps24         | N/A | 13 |
| 10453766 | Thoc1         | N/A | 1  |
| 10454093 |               | N/A | 13 |
| 10454099 | Morf411       | N/A | 13 |
| 10454103 | Gm2889        | N/A | 13 |
| 10454298 | Zfp397        | N/A | 1  |
| 10454332 | Elp2          | N/A | 1  |
| 10454512 |               | N/A | 1  |
| 10454655 | Apc           | N/A | 1  |
| 10454807 | Snora74a      | N/A | 13 |



|          |               |     |    |
|----------|---------------|-----|----|
| 10454828 | Pnet-ps       | N/A | 1  |
| 10454912 | Ankhd1        | N/A | 1  |
| 10455312 | Rbm27         | N/A | 1  |
| 10455372 | C330007P06Rik | N/A | 13 |
| 10455533 | Eif1a         | N/A | 1  |
| 10455602 | Dmxl1         | N/A | 1  |
| 10455954 | Gm4951        | N/A | 1  |
| 10455957 | Gm5970        | N/A | 19 |
| 10456120 | Csnk1a1       | N/A | 1  |
| 10456291 |               | N/A | 1  |
| 10456346 | Sec11c        | N/A | 1  |
| 10456490 |               | N/A | 1  |
| 10456501 | Rnmt          | N/A | 1  |
| 10456619 |               | N/A | 1  |
| 10456622 | Mbd1          | N/A | 13 |
| 10456798 | Hdhd2         | N/A | 13 |
| 10456972 | Gm10265       | N/A | 7  |
| 10456976 | Gm10526       | N/A | 7  |
| 10456978 | Gm10526       | N/A | 7  |
| 10456980 | Gm10526       | N/A | 7  |
| 10456982 | Gm10526       | N/A | 7  |
| 10456984 | Gm10526       | N/A | 7  |
| 10456986 | Gm10526       | N/A | 7  |
| 10457048 | Gm10523       | N/A | 13 |
| 10457203 |               | N/A | 1  |
| 10457223 | Cdh11         | N/A | 1  |
| 10457273 | Kif5b         | N/A | 1  |
| 10457429 | Rock1         | N/A | 1  |
| 10457665 | 4921533I20Rik | N/A | 1  |
| 10457667 | Gm4638        | N/A | 7  |
| 10457776 |               | N/A | 1  |
| 10457959 | Sft2d3        | N/A | 1  |
| 10458044 | Osgep         | N/A | 13 |
| 10458262 | Slc23a1       | N/A | 1  |
| 10458285 | 5133400G04Rik | N/A | 19 |
| 10458349 | Sra1          | N/A | 13 |
| 10458607 | Lars          | N/A | 1  |
| 10458641 | Gpr151        | N/A | 13 |
| 10458757 |               | N/A | 13 |
| 10458784 | Pggt1b        | N/A | 1  |
| 10458823 |               | N/A | 1  |
| 10458834 | Atg12         | N/A | 1  |
| 10459183 | Slc26a2       | N/A | 19 |
| 10459496 | Ccbe1         | N/A | 13 |
| 10459590 | Ptpn2         | N/A | 1  |
| 10459602 | Ptpn2         | N/A | 1  |
| 10459643 | 4930503L19Rik | N/A | 1  |
| 10459912 | Adnp2         | N/A | 1  |
| 10459918 | 1110032A13Rik | N/A | 13 |
| 10460070 |               | N/A | 1  |
| 10460102 | 1700034H14Rik | N/A | 1  |
| 10460194 |               | N/A | 19 |
| 10460202 | Suv420h1      | N/A | 1  |
| 10460344 | Tmem134       | N/A | 13 |
| 10460392 | Pold4         | N/A | 7  |
| 10460423 | Spnb3         | N/A | 13 |
| 10460461 | Rbm4b         | N/A | 7  |
| 10460492 | Mrpl11        | N/A | 13 |
| 10460706 | Synn1         | N/A | 1  |
| 10461707 | Olfir232      | N/A | 1  |
| 10461713 | Olfir1440     | N/A | 13 |
| 10461826 |               | N/A | 7  |
| 10461921 | 2410127L17Rik | N/A | 19 |
| 10462102 | Ptar1         | N/A | 1  |
| 10462309 | C030016D13Rik | N/A | 1  |
| 10462333 | Cdc3711       | N/A | 1  |
| 10462454 | Uhrf2         | N/A | 1  |
| 10462484 | A1cf          | N/A | 1  |
| 10462507 | Papss2        | N/A | 1  |
| 10462521 | Pten          | N/A | 1  |
| 10462535 | B430203M17Rik | N/A | 1  |
| 10462702 | Hectd2        | N/A | 1  |
| 10462724 | Tnks2         | N/A | 1  |
| 10462752 | Btaf1         | N/A | 1  |
| 10463027 | Cyp2c29       | N/A | 1  |
| 10463138 | Dppa2         | N/A | 13 |
| 10463200 | Dhdpsl        | N/A | 1  |
| 10463254 | D19Erd386e    | N/A | 19 |
| 10463404 | Fam178a       | N/A | 1  |
| 10463410 | Fam178a       | N/A | 1  |
| 10463505 | Dpcd          | N/A | 13 |
| 10463515 | Hps6          | N/A | 13 |
| 10463643 |               | N/A | 19 |
| 10463687 | D19Wsu162e    | N/A | 13 |

|          |               |     |    |
|----------|---------------|-----|----|
| 10463911 | Add3          | N/A | 13 |
| 10463930 | Mxi1          | N/A | 13 |
| 10464107 | Ppnr          | N/A | 19 |
| 10464363 | 4930442E04Rik | N/A | 13 |
| 10464448 | Gm6020        | N/A | 1  |
| 10464529 | Tcirg1        | N/A | 19 |
| 10464603 | Aip           | N/A | 7  |
| 10464896 | Peli3         | N/A | 13 |
| 10464974 | Sf3b2         | N/A | 7  |
| 10465045 | Drap1         | N/A | 7  |
| 10465379 | Snx15         | N/A | 7  |
| 10465726 | BC014805      | N/A | 19 |
| 10465742 | C730048C13Rik | N/A | 1  |
| 10465764 | C730048C13Rik | N/A | 1  |
| 10466272 | Olfr1419      | N/A | 13 |
| 10466290 | Olfr76        | N/A | 1  |
| 10466340 | Olfr1448      | N/A | 13 |
| 10466357 | Olfr1472      | N/A | 13 |
| 10466622 | C730037M02Rik | N/A | 19 |
| 10466624 | Aldh1a7       | N/A | 19 |
| 10466682 | Smc5          | N/A | 1  |
| 10466835 | Snora19       | N/A | 1  |
| 10466837 |               | N/A | 13 |
| 10467139 | Lipa          | N/A | 19 |
| 10467230 | Ide           | N/A | 1  |
| 10467859 | Cox15         | N/A | 1  |
| 10467871 | Dnmbp         | N/A | 7  |
| 10467907 | Erlin1        | N/A | 7  |
| 10468307 | Gm6970        | N/A | 13 |
| 10468413 | D19Ert652e    | N/A | 13 |
| 10468487 | LOC280487     | N/A | 7  |
| 10468519 | Smndc1        | N/A | 7  |
| 10468653 | A630007B06Rik | N/A | 1  |
| 10468851 | Snora19       | N/A | 1  |
| 10468881 | Zfp826        | N/A | 1  |
| 10469083 | Upf2          | N/A | 1  |
| 10469127 | LOC280487     | N/A | 7  |
| 10469503 |               | N/A | 19 |
| 10469732 | Yme1l1        | N/A | 1  |
| 10469856 | Wdr85         | N/A | 19 |
| 10470182 | Bmyc          | N/A | 7  |
| 10470322 | Surf1         | N/A | 13 |
| 10470390 | Gm13397       | N/A | 7  |
| 10470954 | Lrrc8a        | N/A | 13 |
| 10470959 | Phyhd1        | N/A | 13 |
| 10471018 | Fam73b        | N/A | 19 |
| 10471503 | Taf1d         | N/A | 1  |
| 10471555 | Angptl2       | N/A | 19 |
| 10471749 | Olfr345       | N/A | 13 |
| 10471772 | Olfr360       | N/A | 19 |
| 10471784 | Rabgap1       | N/A | 1  |
| 10471814 | Gpr21         | N/A | 1  |
| 10471967 | Mbd5          | N/A | 1  |
| 10472058 | Rif1          | N/A | 1  |
| 10472277 | March7        | N/A | 1  |
| 10472289 | Tank          | N/A | 1  |
| 10472350 | Gca           | N/A | 19 |
| 10472372 |               | N/A | 1  |
| 10472440 | Tax1bp3       | N/A | 13 |
| 10472630 | Ubr3          | N/A | 1  |
| 10472794 |               | N/A | 1  |
| 10473242 |               | N/A | 13 |
| 10473487 | Olfr1031      | N/A | 19 |
| 10473491 | Olfr1033      | N/A | 19 |
| 10473494 | Olfr1034      | N/A | 19 |
| 10473496 |               | N/A | 1  |
| 10473578 | Olfr1153      | N/A | 7  |
| 10473604 |               | N/A | 13 |
| 10473606 | Olfr1193      | N/A | 13 |
| 10473643 | Olfr1274      | N/A | 13 |
| 10473793 | Psmc3         | N/A | 13 |
| 10473965 | Arhgap1       | N/A | 1  |
| 10473976 | Harbi1        | N/A | 1  |
| 10474207 | Fbxo3         | N/A | 19 |
| 10474229 | Cd59a         | N/A | 1  |
| 10474243 | Cstf3         | N/A | 1  |
| 10474477 | Gm13961       | N/A | 1  |
| 10474497 |               | N/A | 13 |
| 10474671 | Spred1        | N/A | 7  |
| 10474870 | Rpusd2        | N/A | 1  |
| 10475000 | Rtf1          | N/A | 13 |
| 10475051 | Mga           | N/A | 1  |
| 10475280 | Lcmt2         | N/A | 1  |
| 10475378 | Casc4         | N/A | 1  |

|          |               |     |    |
|----------|---------------|-----|----|
| 10475394 | Ctdspl2       | N/A | 1  |
| 10475544 | Sema6d        | N/A | 1  |
| 10475665 | Usp8          | N/A | 1  |
| 10475686 | Ap4e1         | N/A | 1  |
| 10475841 |               | N/A | 13 |
| 10476297 |               | N/A | 1  |
| 10476399 | Gm4638        | N/A | 7  |
| 10476493 | BC034902      | N/A | 13 |
| 10476728 | Dtd1          | N/A | 13 |
| 10476819 | Gm114         | N/A | 7  |
| 10476868 | 6430503K07Rik | N/A | 19 |
| 10476880 | A530006G24Rik | N/A | 13 |
| 10476989 | Gins1         | N/A | 13 |
| 10477122 | Defb20        | N/A | 13 |
| 10477777 | Ergic3        | N/A | 13 |
| 10477920 | MyI9          | N/A | 7  |
| 10477929 | 1110008F13Rik | N/A | 13 |
| 10478073 | Snhg11        | N/A | 13 |
| 10478077 | B230339M05Rik | N/A | 1  |
| 10478746 | LOC280487     | N/A | 7  |
| 10478778 | Argef2        | N/A | 19 |
| 10478892 | A530013C23Rik | N/A | 7  |
| 10478926 | 1700101G07Rik | N/A | 13 |
| 10479087 | Stx16         | N/A | 1  |
| 10479625 | BC050777      | N/A | 7  |
| 10479649 | Prpf6         | N/A | 1  |
| 10479726 | Pcmt2         | N/A | 7  |
| 10479887 | Sec61a2       | N/A | 1  |
| 10479988 | Taf3          | N/A | 1  |
| 10480121 | Fam188a       | N/A | 19 |
| 10480254 | Cacnb2        | N/A | 13 |
| 10480379 | Mrps5         | N/A | 13 |
| 10480804 | Phpt1         | N/A | 13 |
| 10481111 |               | N/A | 1  |
| 10481135 | Surf1         | N/A | 13 |
| 10481420 | D2Wsu81e      | N/A | 7  |
| 10481531 | BC005624      | N/A | 13 |
| 10481920 | Psm5          | N/A | 19 |
| 10482017 | Rab14         | N/A | 1  |
| 10482172 | Zbtb26        | N/A | 1  |
| 10482177 | Strbp         | N/A | 1  |
| 10482323 | Ppp6c         | N/A | 1  |
| 10482486 | Mmadhc        | N/A | 1  |
| 10482687 | Arl5a         | N/A | 1  |
| 10482731 | Prpf40a       | N/A | 1  |
| 10483046 | Dpp4          | N/A | 1  |
| 10483150 | Figl          | N/A | 19 |
| 10483161 | Gm4638        | N/A | 7  |
| 10483324 | Scn9a         | N/A | 19 |
| 10483633 | Sp3           | N/A | 1  |
| 10483646 | Sp3           | N/A | 13 |
| 10483737 | Atf2          | N/A | 1  |
| 10483770 | Lnp           | N/A | 1  |
| 10483809 | Nfe2l2        | N/A | 19 |
| 10484195 | Ttn           | N/A | 13 |
| 10484197 |               | N/A | 19 |
| 10484201 | 2610301F02Rik | N/A | 1  |
| 10484203 | 2610301F02Rik | N/A | 19 |
| 10484205 | 2610301F02Rik | N/A | 19 |
| 10484207 | 2610301F02Rik | N/A | 19 |
| 10484355 | LOC280487     | N/A | 7  |
| 10484461 |               | N/A | 19 |
| 10484547 | Olfr1016      | N/A | 13 |
| 10484608 | Olfr228       | N/A | 13 |
| 10484630 | Olfr1090      | N/A | 13 |
| 10484679 | Olfr1132      | N/A | 13 |
| 10484718 | Olfr1165      | N/A | 19 |
| 10484739 | Olfr1179      | N/A | 13 |
| 10484803 | Olfr1228      | N/A | 13 |
| 10484816 | Olfr1234      | N/A | 13 |
| 10484875 | Olfr1506      | N/A | 13 |
| 10484880 | Olfr142       | N/A | 13 |
| 10485027 | F2            | N/A | 13 |
| 10485048 | D2Ert391e     | N/A | 1  |
| 10485309 | E530001K10Rik | N/A | 13 |
| 10485355 | Gm4638        | N/A | 7  |
| 10485395 | Trim44        | N/A | 1  |
| 10485483 | Nat10         | N/A | 19 |
| 10485546 | D430041D05Rik | N/A | 13 |
| 10485594 | Pin1          | N/A | 13 |
| 10485633 | Gm10796       | N/A | 19 |
| 10485667 | Dnajc24       | N/A | 1  |
| 10485771 | Olfr1286      | N/A | 13 |
| 10485807 | Olfr1311      | N/A | 13 |

|          |               |     |    |
|----------|---------------|-----|----|
| 10485989 | Aqr           | N/A | 1  |
| 10486041 | Meis2         | N/A | 1  |
| 10486499 | Tmem87a       | N/A | 1  |
| 10486712 | Zscan29       | N/A | 1  |
| 10486898 | Spg11         | N/A | 1  |
| 10487622 | Snrpb         | N/A | 13 |
| 10487629 | Idh3b         | N/A | 19 |
| 10488090 | Tasp1         | N/A | 1  |
| 10488106 | Gm14072       | N/A | 13 |
| 10488195 | Rrbp1         | N/A | 7  |
| 10488291 | Rbbp9         | N/A | 1  |
| 10488449 |               | N/A | 1  |
| 10488507 | Abhd12        | N/A | 7  |
| 10488636 | Defb26        | N/A | 7  |
| 10488860 |               | N/A | 1  |
| 10488959 | 6430550D23Rik | N/A | 19 |
| 10489051 | 5730471H19Rik | N/A | 1  |
| 10489053 | 4930518I15Rik | N/A | 1  |
| 10489195 | 2610036D13Rik | N/A | 7  |
| 10489266 | Chd6          | N/A | 1  |
| 10489413 | Tomm34        | N/A | 7  |
| 10489542 | Wfdc3         | N/A | 7  |
| 10489721 | LOC280487     | N/A | 7  |
| 10489831 | Stau1         | N/A | 1  |
| 10490097 | Cbln4         | N/A | 13 |
| 10490159 | Pmepa1        | N/A | 7  |
| 10490221 | Atp5e         | N/A | 13 |
| 10490302 | 2810021G02Rik | N/A | 1  |
| 10490370 | Psmc7         | N/A | 13 |
| 10490510 | Dido1         | N/A | 1  |
| 10490852 |               | N/A | 13 |
| 10490931 | Ythdf3        | N/A | 1  |
| 10490989 | Cp            | N/A | 1  |
| 10491014 | Hltf          | N/A | 1  |
| 10491083 | Nceh1         | N/A | 7  |
| 10491191 | Rpl22l1       | N/A | 1  |
| 10491231 | Mynn          | N/A | 1  |
| 10491279 | Prkci         | N/A | 1  |
| 10491438 | Ttc14         | N/A | 1  |
| 10491699 | Fgf2          | N/A | 13 |
| 10491848 | Larp2         | N/A | 1  |
| 10491858 |               | N/A | 1  |
| 10491958 | Gm10729       | N/A | 7  |
| 10492220 | 2810407C02Rik | N/A | 1  |
| 10492888 |               | N/A | 19 |
| 10492890 | Lrba          | N/A | 1  |
| 10493094 | Mrpl24        | N/A | 13 |
| 10493120 | Gpatch4       | N/A | 19 |
| 10493177 | Mef2d         | N/A | 1  |
| 10493474 | Muc1          | N/A | 13 |
| 10493662 | Nup210l       | N/A | 7  |
| 10493891 | Ywhaz         | N/A | 13 |
| 10493921 | Sf3a3         | N/A | 13 |
| 10494005 |               | N/A | 13 |
| 10494039 | Lingo4        | N/A | 19 |
| 10494306 | Mcl1          | N/A | 7  |
| 10494460 | Pex11b        | N/A | 13 |
| 10494643 | Hmgcs2        | N/A | 7  |
| 10494662 | Ywhah         | N/A | 13 |
| 10494735 | Gdap2         | N/A | 1  |
| 10495054 | Rhoc          | N/A | 7  |
| 10495173 | 4933421E11Rik | N/A | 1  |
| 10495183 | Kcna3         | N/A | 13 |
| 10495530 | Dph5          | N/A | 1  |
| 10495594 |               | N/A | 13 |
| 10495625 | Dpyd          | N/A | 19 |
| 10495657 | Alg14         | N/A | 19 |
| 10496130 | A630047E20Rik | N/A | 1  |
| 10496167 | LOC280487     | N/A | 7  |
| 10496302 | Manba         | N/A | 19 |
| 10496336 | LOC280487     | N/A | 7  |
| 10496357 |               | N/A | 13 |
| 10496462 | Adh6-ps1      | N/A | 1  |
| 10496892 | Fubp1         | N/A | 1  |
| 10496919 | Usp33         | N/A | 1  |
| 10496956 | Pigk          | N/A | 1  |
| 10497001 | Cryz          | N/A | 13 |
| 10497077 |               | N/A | 1  |
| 10497199 | Tmem189       | N/A | 13 |
| 10497327 | LOC280487     | N/A | 7  |
| 10497399 | Pde7a         | N/A | 19 |
| 10497587 | 1600012F09Rik | N/A | 1  |
| 10497648 | Phc3          | N/A | 1  |
| 10497931 | Cflar         | N/A | 1  |

|          |               |     |    |
|----------|---------------|-----|----|
| 10498000 | Gm10730       | N/A | 13 |
| 10498307 | Gm6394        | N/A | 7  |
| 10498415 | Dhx36         | N/A | 1  |
| 10498485 | Slc33a1       | N/A | 1  |
| 10498519 | Ssr3          | N/A | 1  |
| 10498531 | Ccnl1         | N/A | 1  |
| 10498566 |               | N/A | 1  |
| 10498591 | Chmp1a        | N/A | 13 |
| 10498595 | Snrpd2        | N/A | 13 |
| 10498710 | Bche          | N/A | 19 |
| 10498837 | Etfhd         | N/A | 1  |
| 10499132 | Mab21l2       | N/A | 19 |
| 10499160 | Cd1d1         | N/A | 19 |
| 10499309 | Apoa1bp       | N/A | 13 |
| 10499420 | Robld3        | N/A | 7  |
| 10499504 | Mtx1          | N/A | 13 |
| 10499639 | Cks1b         | N/A | 13 |
| 10499652 | 4632404H12Rik | N/A | 1  |
| 10499876 | Lelp1         | N/A | 13 |
| 10499902 | Spr4          | N/A | 13 |
| 10499969 |               | N/A | 13 |
| 10499979 |               | N/A | 13 |
| 10500034 | Psmb4         | N/A | 13 |
| 10500103 | Gabpb2        | N/A | 1  |
| 10500218 | Tars2         | N/A | 13 |
| 10500360 | Gm15441       | N/A | 13 |
| 10500388 | Polr3c        | N/A | 7  |
| 10500469 | Pde4dip       | N/A | 1  |
| 10500527 | LOC280487     | N/A | 7  |
| 10500780 | Nr1h5         | N/A | 1  |
| 10500796 |               | N/A | 1  |
| 10500798 |               | N/A | 1  |
| 10500813 | Hipk1         | N/A | 1  |
| 10500845 | A130049A11Rik | N/A | 1  |
| 10500847 | Magi3         | N/A | 1  |
| 10500876 | Lrig2         | N/A | 1  |
| 10500976 | Rap1a         | N/A | 1  |
| 10501420 | Stxbp3a       | N/A | 7  |
| 10501447 | Prpf38b       | N/A | 1  |
| 10501591 | A930005H10Rik | N/A | 19 |
| 10501690 | Slc35a3       | N/A | 1  |
| 10501802 | Tmem56        | N/A | 1  |
| 10501832 | Abcd3         | N/A | 19 |
| 10501879 | Usp53         | N/A | 1  |
| 10502440 |               | N/A | 7  |
| 10502770 | Lphn2         | N/A | 1  |
| 10502774 | Lphn2         | N/A | 1  |
| 10502780 | Lphn2         | N/A | 1  |
| 10502787 |               | N/A | 7  |
| 10503085 | Tgs1          | N/A | 1  |
| 10503232 |               | N/A | 1  |
| 10503251 | 2610301B20Rik | N/A | 1  |
| 10503283 | 1110037F02Rik | N/A | 1  |
| 10503410 | Tmem64        | N/A | 19 |
| 10503431 | Nbn           | N/A | 7  |
| 10503484 | Fam82b        | N/A | 1  |
| 10503502 | Ttpa          | N/A | 1  |
| 10503534 | Ccnc          | N/A | 1  |
| 10503570 | Sfrs18        | N/A | 1  |
| 10503615 |               | N/A | 19 |
| 10503656 |               | N/A | 13 |
| 10503695 | Bach2         | N/A | 7  |
| 10504137 | 4933409K07Rik | N/A | 19 |
| 10504148 | 4933409K07Rik | N/A | 13 |
| 10504178 | 4933409K07Rik | N/A | 13 |
| 10504201 | 4933409K07Rik | N/A | 19 |
| 10504329 | RP23-195K8.6  | N/A | 13 |
| 10504456 | Ccin          | N/A | 13 |
| 10504499 | Zcchc7        | N/A | 1  |
| 10504514 | 1700055D18Rik | N/A | 1  |
| 10504613 | E230008N13Rik | N/A | 13 |
| 10504646 |               | N/A | 13 |
| 10504660 |               | N/A | 13 |
| 10504672 | Tdrd7         | N/A | 7  |
| 10504753 | LOC641050     | N/A | 13 |
| 10504761 | LOC641050     | N/A | 13 |
| 10504902 | Murc          | N/A | 13 |
| 10504926 | Rnf20         | N/A | 1  |
| 10504955 | Gm12466       | N/A | 13 |
| 10505200 | Hsd1l2        | N/A | 13 |
| 10505537 | Gm428         | N/A | 13 |
| 10505543 | Gm428         | N/A | 13 |
| 10505550 | Gm428         | N/A | 13 |
| 10505556 | Gm428         | N/A | 13 |

|          |                    |     |    |
|----------|--------------------|-----|----|
| 10505562 | Gm428              | N/A | 13 |
| 10505623 | D4Bwg0951e         | N/A | 1  |
| 10505630 | Snopc3             | N/A | 1  |
| 10505749 | Dennd4c            | N/A | 1  |
| 10505881 |                    | N/A | 7  |
| 10505982 | Fggy               | N/A | 19 |
| 10505994 | Fggy               | N/A | 1  |
| 10505996 | Fggy               | N/A | 19 |
| 10506031 | Nfia               | N/A | 19 |
| 10506118 | Usp1               | N/A | 1  |
| 10506125 | Angptl3            | N/A | 19 |
| 10506134 | Atg4c              | N/A | 1  |
| 10506146 | Gm10305            | N/A | 1  |
| 10506431 | Gm10304            | N/A | 13 |
| 10506498 |                    | N/A | 13 |
| 10506500 | Usp24              | N/A | 1  |
| 10506569 | Usp24              | N/A | 13 |
| 10506571 | Dhcr24             | N/A | 19 |
| 10506668 | Yipf1              | N/A | 13 |
| 10507334 | 0610037D15Rik      | N/A | 7  |
| 10507594 | Slc2a1             | N/A | 13 |
| 10507671 | Guca2a             | N/A | 13 |
| 10507804 | Trit1              | N/A | 1  |
| 10507894 | Rragc              | N/A | 13 |
| 10508249 | OTTMUSG0000009332  | N/A | 13 |
| 10508759 | Rpa2               | N/A | 13 |
| 10508887 | Nr0b2              | N/A | 7  |
| 10508972 | Gm5589             | N/A | 13 |
| 10509023 | Syf2               | N/A | 13 |
| 10509113 | Fusip1             | N/A | 1  |
| 10509137 | Hmgcl              | N/A | 13 |
| 10509204 | Tcea3              | N/A | 7  |
| 10509228 | Hnrnpr             | N/A | 1  |
| 10509246 | Luzp1              | N/A | 19 |
| 10509253 | 4930549C01Rik      | N/A | 7  |
| 10509562 | Mul1               | N/A | 13 |
| 10509596 | Rnf186             | N/A | 7  |
| 10510125 | Mcrs1              | N/A | 13 |
| 10510162 | Ppp2r5a            | N/A | 1  |
| 10510176 | Smarca5            | N/A | 1  |
| 10510194 | Hmgb1              | N/A | 13 |
| 10510197 | Ppp2r5a            | N/A | 19 |
| 10510212 | Hmgb1              | N/A | 13 |
| 10510215 | OTTMUSG00000010657 | N/A | 1  |
| 10510227 | Hmgb1              | N/A | 13 |
| 10510957 | Pank4              | N/A | 13 |
| 10511084 | Nadk               | N/A | 7  |
| 10511139 | Ssu72              | N/A | 13 |
| 10511366 | Gm11780            | N/A | 19 |
| 10511501 | 2310030N02Rik      | N/A | 13 |
| 10511725 | Cyb5r4             | N/A | 13 |
| 10511843 | 1810074P20Rik      | N/A | 1  |
| 10511952 | Orc3l              | N/A | 1  |
| 10512125 | Psenen             | N/A | 7  |
| 10512136 | Bag1               | N/A | 13 |
| 10512350 | 4933409K07Rik      | N/A | 19 |
| 10512352 | 4933409K07Rik      | N/A | 19 |
| 10512463 | LOC280487          | N/A | 7  |
| 10512867 | Tex10              | N/A | 1  |
| 10512999 | Ai427809           | N/A | 13 |
| 10513002 | Gm12471            | N/A | 13 |
| 10513082 | D730040F13Rik      | N/A | 1  |
| 10513143 | Ptpn3              | N/A | 13 |
| 10513162 | Ptpn3              | N/A | 7  |
| 10513268 | Ai314180           | N/A | 1  |
| 10513622 | Pole3              | N/A | 13 |
| 10514070 | 2310067E19Rik      | N/A | 19 |
| 10514158 | Psip1              | N/A | 1  |
| 10514292 | Ifna14             | N/A | 13 |
| 10514441 | Mysm1              | N/A | 1  |
| 10514473 |                    | N/A | 13 |
| 10514510 | Cyp2j6             | N/A | 1  |
| 10514520 | Cyp2j9             | N/A | 19 |
| 10514590 | Dock7              | N/A | 19 |
| 10514645 |                    | N/A | 13 |
| 10515086 | 9630013D21Rik      | N/A | 19 |
| 10515164 | Cmpk1              | N/A | 1  |
| 10515253 | Uqcrh              | N/A | 13 |
| 10515399 | Plk3               | N/A | 7  |
| 10515528 | Dph2               | N/A | 13 |
| 10515706 | BC059842           | N/A | 13 |
| 10515771 | Tie1               | N/A | 13 |
| 10515826 | Olfrl337           | N/A | 13 |
| 10515828 | Olfrl335           | N/A | 13 |

|          |               |     |    |
|----------|---------------|-----|----|
| 10515841 | Gm12866       | N/A | 13 |
| 10515884 | Ppih          | N/A | 13 |
| 10515930 | AA415398      | N/A | 1  |
| 10516079 | C130018J17Rik | N/A | 13 |
| 10516103 | Macf1         | N/A | 1  |
| 10516219 | Gm10572       | N/A | 13 |
| 10516275 | Rpl28         | N/A | 7  |
| 10516348 | Eif2c3        | N/A | 1  |
| 10516576 | Rbbp4         | N/A | 7  |
| 10516637 | Fam167b       | N/A | 13 |
| 10516735 | Tinag1        | N/A | 13 |
| 10517053 | Trnp1         | N/A | 13 |
| 10517687 | Gm16287       | N/A | 1  |
| 10517706 | Mrto4         | N/A | 13 |
| 10518216 | Gm9944        | N/A | 13 |
| 10518228 | Vps13d        | N/A | 19 |
| 10518329 | Rpl28         | N/A | 7  |
| 10518341 | Ppp2r5a       | N/A | 1  |
| 10518568 | Gm13208       | N/A | 13 |
| 10518726 | Slc25a33      | N/A | 7  |
| 10518847 | Phf13         | N/A | 13 |
| 10518857 | Zbtb48        | N/A | 7  |
| 10519052 | 2810405K02Rik | N/A | 13 |
| 10519181 |               | N/A | 13 |
| 10519203 | A230069A22Rik | N/A | 1  |
| 10519211 | Tas1r3        | N/A | 19 |
| 10519333 | 5830415L20Rik | N/A | 1  |
| 10519354 | Pex1          | N/A | 19 |
| 10519392 | Krit1         | N/A | 1  |
| 10519420 | Akap9         | N/A | 1  |
| 10519475 |               | N/A | 13 |
| 10519497 | Steap4        | N/A | 7  |
| 10519640 | Anapc5        | N/A | 13 |
| 10519655 | Anapc5        | N/A | 13 |
| 10519657 | Anapc5        | N/A | 13 |
| 10519667 | Anapc5        | N/A | 13 |
| 10519669 | Anapc5        | N/A | 13 |
| 10519671 | Speer1-ps1    | N/A | 13 |
| 10519675 | Anapc5        | N/A | 13 |
| 10519684 | Anapc5        | N/A | 13 |
| 10519686 | Anapc5        | N/A | 13 |
| 10519811 | Speer7-ps1    | N/A | 13 |
| 10519857 | Hgf           | N/A | 19 |
| 10520046 |               | N/A | 13 |
| 10520111 | Nupl2         | N/A | 1  |
| 10520211 | Agap3         | N/A | 13 |
| 10520271 | 2900005J15Rik | N/A | 19 |
| 10520360 |               | N/A | 13 |
| 10520638 |               | N/A | 13 |
| 10520763 | Gckr          | N/A | 1  |
| 10520815 | Slc4a1ap      | N/A | 1  |
| 10520860 |               | N/A | 1  |
| 10520948 | Plb1          | N/A | 19 |
| 10520965 | Yes1          | N/A | 1  |
| 10520982 | Depdc5        | N/A | 19 |
| 10521261 | Htt           | N/A | 1  |
| 10521461 | Grpel1        | N/A | 13 |
| 10521543 | Stx18         | N/A | 1  |
| 10521602 | Cpeb2         | N/A | 1  |
| 10521690 | Ppih          | N/A | 13 |
| 10521811 |               | N/A | 13 |
| 10521822 | Gm8012        | N/A | 13 |
| 10521848 | Zcchc4        | N/A | 1  |
| 10521863 | Anapc4        | N/A | 19 |
| 10522285 | C330024D21Rik | N/A | 13 |
| 10522303 | Guf1          | N/A | 1  |
| 10522558 |               | N/A | 13 |
| 10522585 |               | N/A | 13 |
| 10522676 | Srp72         | N/A | 1  |
| 10522742 | LOC280487     | N/A | 7  |
| 10522908 | 4931407G18Rik | N/A | 13 |
| 10522976 | Rufy3         | N/A | 19 |
| 10523060 | Gm9958        | N/A | 1  |
| 10523195 | Thap6         | N/A | 1  |
| 10523316 | Gm7682        | N/A | 13 |
| 10523337 | Gm7682        | N/A | 13 |
| 10523346 | Gm7682        | N/A | 13 |
| 10523468 | Bmp2k         | N/A | 19 |
| 10523479 | Slc25a5       | N/A | 19 |
| 10523746 | BC005561      | N/A | 1  |
| 10523752 | 4932441K18Rik | N/A | 1  |
| 10523785 | Zfp326        | N/A | 19 |
| 10523905 | Mtf2          | N/A | 1  |
| 10523955 | Dr1           | N/A | 1  |

|          |               |     |    |
|----------|---------------|-----|----|
| 10524415 |               | N/A | 7  |
| 10524681 | Triap1        | N/A | 13 |
| 10524844 | Taok3         | N/A | 7  |
| 10525076 | Sds           | N/A | 13 |
| 10525185 |               | N/A | 13 |
| 10525236 | AU042671      | N/A | 7  |
| 10525336 | Fam109a       | N/A | 7  |
| 10525397 | Arpc3         | N/A | 7  |
| 10525553 |               | N/A | 1  |
| 10525835 |               | N/A | 13 |
| 10526133 | Rabgef1       | N/A | 13 |
| 10526179 | Rpl28         | N/A | 7  |
| 10526520 | Plod3         | N/A | 13 |
| 10526726 | Zkscan1       | N/A | 7  |
| 10527425 | LOC280487     | N/A | 7  |
| 10527483 |               | N/A | 19 |
| 10527494 | Cyp3a25       | N/A | 1  |
| 10527547 | Gtf3a         | N/A | 13 |
| 10527571 |               | N/A | 7  |
| 10527832 | Pds5b         | N/A | 1  |
| 10527878 | LOC171266     | N/A | 13 |
| 10527880 | C030048B08Rik | N/A | 1  |
| 10528120 | Dmtf1         | N/A | 1  |
| 10528161 | Anapc5        | N/A | 13 |
| 10528165 | LOC280487     | N/A | 7  |
| 10528198 |               | N/A | 13 |
| 10528202 |               | N/A | 13 |
| 10528205 | LOC280487     | N/A | 7  |
| 10528257 | Rsbni1        | N/A | 1  |
| 10528268 | Ptpn12        | N/A | 1  |
| 10528474 |               | N/A | 1  |
| 10528484 | Srpk2         | N/A | 1  |
| 10528583 | Cdk5          | N/A | 13 |
| 10528804 | 5031410I06Rik | N/A | 13 |
| 10528810 |               | N/A | 13 |
| 10528815 | 5031410I06Rik | N/A | 13 |
| 10528821 | Gm10220       | N/A | 13 |
| 10528929 | Hadha         | N/A | 13 |
| 10529091 |               | N/A | 19 |
| 10529118 | Eif2b4        | N/A | 13 |
| 10529133 | Zfp513        | N/A | 13 |
| 10529260 | C330019G07Rik | N/A | 1  |
| 10529273 | Ctbp1         | N/A | 13 |
| 10529375 | Mxd4          | N/A | 7  |
| 10529425 | Nop14         | N/A | 1  |
| 10529741 | Rab28         | N/A | 1  |
| 10529801 | Fbxl5         | N/A | 1  |
| 10529923 | Lcorl         | N/A | 1  |
| 10530278 |               | N/A | 1  |
| 10530625 | Gm15653       | N/A | 13 |
| 10531034 | Ugt2b34       | N/A | 19 |
| 10531197 | Adamts3       | N/A | 13 |
| 10531199 | D130050E23Rik | N/A | 1  |
| 10531437 | Scarb2        | N/A | 13 |
| 10531501 | C87414        | N/A | 13 |
| 10531579 |               | N/A | 13 |
| 10531675 | Sec31a        | N/A | 1  |
| 10531919 | Hsd17b11      | N/A | 13 |
| 10531980 | BC057170      | N/A | 7  |
| 10532157 | Tmed5         | N/A | 1  |
| 10532164 | Atp5k         | N/A | 13 |
| 10532313 |               | N/A | 1  |
| 10532588 | Myo18b        | N/A | 13 |
| 10532716 | 1700069L16Rik | N/A | 13 |
| 10532896 | 2610524H06Rik | N/A | 13 |
| 10532926 | Acads         | N/A | 13 |
| 10533071 | Suds3         | N/A | 13 |
| 10533844 | Rilpl2        | N/A | 13 |
| 10534504 | Tmem120a      | N/A | 7  |
| 10534654 | Znhit1        | N/A | 13 |
| 10534679 | Trim56        | N/A | 7  |
| 10534889 |               | N/A | 7  |
| 10534909 | Sp110         | N/A | 13 |
| 10535084 | 3110082I17Rik | N/A | 7  |
| 10535189 | Mad111        | N/A | 19 |
| 10535413 |               | N/A | 13 |
| 10535449 | E130309D02Rik | N/A | 13 |
| 10535477 | Usp42         | N/A | 1  |
| 10535714 | Cyp3a25       | N/A | 1  |
| 10535747 | Gm10858       | N/A | 13 |
| 10535927 |               | N/A | 13 |
| 10535946 | N4bp2I2       | N/A | 1  |
| 10536002 | C87414        | N/A | 13 |
| 10536025 | Gm7682        | N/A | 13 |



|          |               |     |    |
|----------|---------------|-----|----|
| 10536029 | AA792892      | N/A | 13 |
| 10536033 | Gm7682        | N/A | 13 |
| 10536041 | AA792892      | N/A | 13 |
| 10536052 | Gm7682        | N/A | 13 |
| 10536103 | LOC624931     | N/A | 13 |
| 10536107 | LOC625240     | N/A | 13 |
| 10536143 | LOC624931     | N/A | 13 |
| 10536151 | Gm7682        | N/A | 13 |
| 10536273 | Casd1         | N/A | 1  |
| 10536294 | Peg10         | N/A | 19 |
| 10536297 | Ppp1r9a       | N/A | 1  |
| 10536369 | Clgalt1       | N/A | 1  |
| 10536376 | Mios          | N/A | 1  |
| 10536440 | Gm725         | N/A | 13 |
| 10536541 | St7           | N/A | 19 |
| 10536620 | Ing3          | N/A | 1  |
| 10536787 |               | N/A | 19 |
| 10537078 | Mkin1         | N/A | 19 |
| 10537184 | Cald1         | N/A | 1  |
| 10537494 | Ssbp1         | N/A | 1  |
| 10537509 | Mgam          | N/A | 1  |
| 10537828 | Olfra434      | N/A | 13 |
| 10538586 | V1rc27        | N/A | 13 |
| 10538755 | Smarcad1      | N/A | 1  |
| 10538890 | LOC641050     | N/A | 13 |
| 10539143 | Retsat        | N/A | 13 |
| 10539177 | Eif4a3        | N/A | 13 |
| 10539337 | Mogs          | N/A | 13 |
| 10539710 | Tia1          | N/A | 1  |
| 10539741 | Aak1          | N/A | 1  |
| 10539882 | Ruvbl1        | N/A | 1  |
| 10540122 | Slc6a6        | N/A | 19 |
| 10540273 | Ube2v2        | N/A | 1  |
| 10540531 | LOC280487     | N/A | 7  |
| 10540705 | Il17rc        | N/A | 13 |
| 10540790 | Vhl           | N/A | 19 |
| 10540855 | Hrh1          | N/A | 13 |
| 10541067 | Eif4a3        | N/A | 13 |
| 10541075 | Cxcl12        | N/A | 19 |
| 10541089 | 2900097C17Rik | N/A | 7  |
| 10541129 | LOC280487     | N/A | 7  |
| 10541246 | Il17ra        | N/A | 7  |
| 10541318 | Slc6a13       | N/A | 19 |
| 10541410 | Mug1          | N/A | 1  |
| 10541426 | Cpamd8        | N/A | 1  |
| 10541448 | Cpamd8        | N/A | 1  |
| 10541873 | Mrpl51        | N/A | 13 |
| 10542181 | Clec9a        | N/A | 1  |
| 10542275 | Etv6          | N/A | 1  |
| 10542310 | Cdkn1b        | N/A | 1  |
| 10542376 | Rpl36al       | N/A | 13 |
| 10542555 | MGC7817       | N/A | 1  |
| 10542714 | Lym5          | N/A | 1  |
| 10542824 | Mrps35        | N/A | 13 |
| 10542993 | Pon3          | N/A | 19 |
| 10543029 | LOC280487     | N/A | 7  |
| 10543140 | Gm6578        | N/A | 13 |
| 10543409 | Tas2r118      | N/A | 13 |
| 10543512 | Zfp800        | N/A | 1  |
| 10543678 |               | N/A | 7  |
| 10543686 | Ube2h         | N/A | 7  |
| 10543697 | Zc3hc1        | N/A | 7  |
| 10543709 | Tmem209       | N/A | 1  |
| 10543904 | Cnot4         | N/A | 1  |
| 10543944 | Mtpn          | N/A | 1  |
| 10544002 | Creb3l2       | N/A | 1  |
| 10544252 | E330009J07Rik | N/A | 13 |
| 10544497 | Tarbp2        | N/A | 13 |
| 10544555 | Zfp746        | N/A | 19 |
| 10544638 | Tra2a         | N/A | 1  |
| 10544823 |               | N/A | 1  |
| 10544827 |               | N/A | 1  |
| 10544939 |               | N/A | 13 |
| 10544999 | V1rc26        | N/A | 13 |
| 10545001 | Ppm1k         | N/A | 7  |
| 10545130 | Gadd45a       | N/A | 7  |
| 10545184 |               | N/A | 13 |
| 10545187 |               | N/A | 13 |
| 10545194 |               | N/A | 13 |
| 10545196 |               | N/A | 13 |
| 10545198 |               | N/A | 13 |
| 10545271 | Thns12        | N/A | 7  |
| 10545346 | Ptcd3         | N/A | 19 |
| 10545401 | Vamp5         | N/A | 13 |

|          |               |     |    |
|----------|---------------|-----|----|
| 10545528 |               | N/A | 7  |
| 10545771 | Cyp26b1       | N/A | 7  |
| 10545780 | Exoc6b        | N/A | 1  |
| 10546092 | Rab7          | N/A | 1  |
| 10546231 | V1ra6         | N/A | 13 |
| 10546508 |               | N/A | 19 |
| 10546604 |               | N/A | 1  |
| 10546725 | Pdzrn3        | N/A | 1  |
| 10546891 | Camk1         | N/A | 13 |
| 10547009 | Vgll4         | N/A | 13 |
| 10547015 | 1500001M20Rik | N/A | 13 |
| 10547200 |               | N/A | 13 |
| 10547469 | Hsn2          | N/A | 1  |
| 10547553 | Mical3        | N/A | 1  |
| 10547689 | Vmn2r26       | N/A | 13 |
| 10547758 | Lpcat3        | N/A | 13 |
| 10547789 | Grccl0        | N/A | 7  |
| 10548043 | Kcna5         | N/A | 7  |
| 10548105 | Ccnd2         | N/A | 13 |
| 10548661 |               | N/A | 13 |
| 10548761 | Hebp1         | N/A | 13 |
| 10548785 | Dynlt1        | N/A | 13 |
| 10549219 | Gm10396       | N/A | 19 |
| 10549341 | 4933424B01Rik | N/A | 1  |
| 10549402 | Ergic2        | N/A | 1  |
| 10549530 |               | N/A | 1  |
| 10549532 |               | N/A | 1  |
| 10549536 | Amn1          | N/A | 1  |
| 10549714 | Rpl28         | N/A | 7  |
| 10549875 | Olf1350       | N/A | 13 |
| 10549899 | Zfp418        | N/A | 1  |
| 10549964 | Zscan4c       | N/A | 13 |
| 10549972 | Zscan4c       | N/A | 13 |
| 10549990 | LOC171266     | N/A | 13 |
| 10550200 |               | N/A | 13 |
| 10550316 | Tmem160       | N/A | 13 |
| 10550531 | Sympk         | N/A | 7  |
| 10550601 |               | N/A | 13 |
| 10550760 | V1rd14        | N/A | 13 |
| 10550765 | V1rd14        | N/A | 13 |
| 10550768 | V1rd21        | N/A | 13 |
| 10550770 | V1rd21        | N/A | 13 |
| 10550782 | V1rd14        | N/A | 13 |
| 10550822 | V1rd17        | N/A | 13 |
| 10550829 | V1rd18        | N/A | 13 |
| 10550935 | Xrcc1         | N/A | 7  |
| 10551102 | Prr19         | N/A | 13 |
| 10551181 | B9d2          | N/A | 13 |
| 10551215 | Rnf170        | N/A | 1  |
| 10551393 | Akt2          | N/A | 13 |
| 10551736 | Ppp1r14a      | N/A | 13 |
| 10551815 | Zfp260        | N/A | 1  |
| 10551836 | Cox7a1        | N/A | 13 |
| 10551971 | U2af114       | N/A | 7  |
| 10551981 | U2af114       | N/A | 13 |
| 10551996 |               | N/A | 7  |
| 10552249 | Gm6795        | N/A | 13 |
| 10552252 | 1600014C10Rik | N/A | 7  |
| 10552260 |               | N/A | 13 |
| 10552276 | Ube2h         | N/A | 7  |
| 10552363 | EU599041      | N/A | 1  |
| 10552752 | Akt1s1        | N/A | 7  |
| 10553741 |               | N/A | 1  |
| 10553813 | Ube3a         | N/A | 1  |
| 10553967 | Pcsk6         | N/A | 13 |
| 10554059 | Gm10622       | N/A | 1  |
| 10554166 | Akap13        | N/A | 1  |
| 10554323 |               | N/A | 13 |
| 10554665 | Gm7957        | N/A | 7  |
| 10554893 | Ccdc89        | N/A | 13 |
| 10554895 | Crebzf        | N/A | 1  |
| 10555089 | Rsf1          | N/A | 1  |
| 10555260 | Olf1521       | N/A | 13 |
| 10555339 | C2cd3         | N/A | 7  |
| 10555550 | Clpb          | N/A | 13 |
| 10555681 | Stim1         | N/A | 13 |
| 10555793 | Olf1608       | N/A | 13 |
| 10555905 | Olf1677       | N/A | 13 |
| 10555913 | Olf1688       | N/A | 13 |
| 10555915 | Olf1688       | N/A | 13 |
| 10556018 |               | N/A | 13 |
| 10556037 | Olf1714       | N/A | 7  |
| 10556125 | Gm6702        | N/A | 13 |
| 10556165 | Olf1513       | N/A | 13 |

|          |               |     |    |
|----------|---------------|-----|----|
| 10556208 | D930014E17Rik | N/A | 13 |
| 10556442 | Tead1         | N/A | 19 |
| 10556583 | Nucb2         | N/A | 1  |
| 10556734 | Acsm1         | N/A | 19 |
| 10557420 | Tufm          | N/A | 13 |
| 10557628 | Zfp689        | N/A | 1  |
| 10557780 |               | N/A | 1  |
| 10558001 | Inpp5f        | N/A | 1  |
| 10558134 | Plekha1       | N/A | 1  |
| 10558248 | Bub3          | N/A | 13 |
| 10558515 | Inpp5a        | N/A | 13 |
| 10558653 | Olfr538       | N/A | 13 |
| 10558657 | Olfr538       | N/A | 13 |
| 10558742 | Nlrp6         | N/A | 19 |
| 10559357 | Gm10574       | N/A | 19 |
| 10559454 | Pira1         | N/A | 13 |
| 10559513 |               | N/A | 1  |
| 10559676 | Ube2s         | N/A | 13 |
| 10559745 |               | N/A | 13 |
| 10559754 | V1rd11        | N/A | 13 |
| 10559786 | Olfr1348      | N/A | 13 |
| 10559978 | Zscan4f       | N/A | 13 |
| 10560043 | Zfp329        | N/A | 1  |
| 10560153 | Obox3         | N/A | 13 |
| 10560315 | Ppp5c         | N/A | 13 |
| 10560630 | Tomm40        | N/A | 13 |
| 10560728 | V1rd14        | N/A | 13 |
| 10560730 | V1rd21        | N/A | 13 |
| 10560740 | V1rd21        | N/A | 13 |
| 10560742 | V1rd21        | N/A | 13 |
| 10560744 | V1rd15        | N/A | 13 |
| 10560752 | V1rd14        | N/A | 13 |
| 10560758 | LOC100042966  | N/A | 13 |
| 10560771 | Gm6239        | N/A | 13 |
| 10560780 |               | N/A | 13 |
| 10560783 | V1rd21        | N/A | 13 |
| 10560785 | V1rd21        | N/A | 13 |
| 10560787 | V1rd21        | N/A | 13 |
| 10560789 | V1rd21        | N/A | 13 |
| 10560797 | V1rd14        | N/A | 13 |
| 10560801 | Gm6239        | N/A | 13 |
| 10561170 | Egln2         | N/A | 13 |
| 10561335 | Prkcz         | N/A | 13 |
| 10561343 | Josd1         | N/A | 7  |
| 10561345 | Zfp780b       | N/A | 1  |
| 10561356 | Psmc4         | N/A | 13 |
| 10561453 | Zfp36         | N/A | 7  |
| 10561552 | Eif3k         | N/A | 7  |
| 10561854 | Tbc1          | N/A | 13 |
| 10562000 | Psenen        | N/A | 7  |
| 10562059 | Cox6b1        | N/A | 13 |
| 10562130 | Ffar1         | N/A | 13 |
| 10562349 | Pdcd2l        | N/A | 13 |
| 10562439 | Gpatch1       | N/A | 1  |
| 10562576 | Plekha1       | N/A | 7  |
| 10562637 | Ccnb1         | N/A | 13 |
| 10562685 |               | N/A | 13 |
| 10563085 | Fcgrt         | N/A | 13 |
| 10563094 | Rps11         | N/A | 13 |
| 10563101 | Rpl13a        | N/A | 13 |
| 10563260 | Snrnp70       | N/A | 1  |
| 10563712 | Mrgpra2       | N/A | 13 |
| 10563802 | Rbbp6         | N/A | 13 |
| 10563804 | Rbbp6         | N/A | 13 |
| 10563806 | Rbbp6         | N/A | 13 |
| 10563808 | Rbbp6         | N/A | 13 |
| 10563810 | Rbbp6         | N/A | 13 |
| 10563812 | Rbbp6         | N/A | 13 |
| 10563899 |               | N/A | 13 |
| 10563959 |               | N/A | 13 |
| 10564089 |               | N/A | 13 |
| 10564109 |               | N/A | 13 |
| 10564117 |               | N/A | 13 |
| 10564539 | Mctp2         | N/A | 1  |
| 10564573 | Chd2          | N/A | 19 |
| 10565499 | Gm5341        | N/A | 13 |
| 10565528 | Gm2509        | N/A | 7  |
| 10565547 | Pcf11         | N/A | 1  |
| 10565567 | 4632427E13Rik | N/A | 1  |
| 10565587 | Fxn           | N/A | 13 |
| 10565596 |               | N/A | 13 |
| 10565598 | LOC280487     | N/A | 7  |
| 10565802 | Rps3          | N/A | 13 |
| 10565815 | Gm4980        | N/A | 13 |

|          |               |     |    |
|----------|---------------|-----|----|
| 10566201 | Olfr589       | N/A | 13 |
| 10566227 | Olfr620       | N/A | 13 |
| 10566249 | Olfr68        | N/A | 13 |
| 10566322 | Olfr648       | N/A | 13 |
| 10566409 | Olfr670       | N/A | 13 |
| 10566599 | Olfr699       | N/A | 13 |
| 10566607 | Olfr705       | N/A | 1  |
| 10566707 | Olfr519       | N/A | 13 |
| 10567072 | Psm1          | N/A | 13 |
| 10567229 | Smg1          | N/A | 1  |
| 10567394 | Pdilt         | N/A | 19 |
| 10567446 | Dnahc3        | N/A | 13 |
| 10567458 | Dnahc3        | N/A | 19 |
| 10567518 | Dnahc3        | N/A | 13 |
| 10567589 | Usp31         | N/A | 13 |
| 10567702 | Arhgap17      | N/A | 1  |
| 10568078 | Taok2         | N/A | 19 |
| 10568107 |               | N/A | 1  |
| 10568217 | Dctpp1        | N/A | 13 |
| 10568328 | Vkorc1        | N/A | 7  |
| 10568392 | Rgs10         | N/A | 13 |
| 10568534 | Gm4638        | N/A | 7  |
| 10568638 | Uros          | N/A | 19 |
| 10568861 | Gm4974        | N/A | 13 |
| 10568958 | Olfr530       | N/A | 13 |
| 10569011 | Ifitm5        | N/A | 13 |
| 10569057 | Rnh1          | N/A | 13 |
| 10569441 | Nap14         | N/A | 13 |
| 10569958 | Ccl25         | N/A | 19 |
| 10570139 |               | N/A | 13 |
| 10570280 | F7            | N/A | 13 |
| 10570308 | Proz          | N/A | 1  |
| 10570614 | Defb6         | N/A | 13 |
| 10570639 | 6820431F20Rik | N/A | 1  |
| 10570647 | LOC100039037  | N/A | 13 |
| 10570656 |               | N/A | 13 |
| 10570676 |               | N/A | 13 |
| 10570690 |               | N/A | 13 |
| 10570706 | Defa20        | N/A | 13 |
| 10570711 | Defa20        | N/A | 13 |
| 10570729 |               | N/A | 13 |
| 10570975 | Tm2d2         | N/A | 7  |
| 10571093 | Rnf170        | N/A | 1  |
| 10571114 | Erlin2        | N/A | 13 |
| 10571162 | Eif4ebp1      | N/A | 7  |
| 10571241 | Purg          | N/A | 1  |
| 10571599 |               | N/A | 1  |
| 10571824 | Gm10674       | N/A | 13 |
| 10571826 |               | N/A | 13 |
| 10571857 |               | N/A | 13 |
| 10571920 | B230317F23Rik | N/A | 19 |
| 10571922 | Nek1          | N/A | 1  |
| 10572077 | Naf1          | N/A | 7  |
| 10572332 | Sfrs14        | N/A | 19 |
| 10572449 | Lsm4          | N/A | 13 |
| 10572724 | Zfp709        | N/A | 1  |
| 10572730 | Zfp617        | N/A | 1  |
| 10573194 | Ndufb7        | N/A | 13 |
| 10573637 | Phkb          | N/A | 1  |
| 10574135 | Nlrc5         | N/A | 1  |
| 10574184 | Rspry1        | N/A | 1  |
| 10574232 | Coq9          | N/A | 13 |
| 10574350 | Mmp15         | N/A | 7  |
| 10574375 |               | N/A | 1  |
| 10574429 |               | N/A | 13 |
| 10574432 | Gm4638        | N/A | 7  |
| 10574434 | LOC280487     | N/A | 7  |
| 10574456 | Ckif          | N/A | 1  |
| 10574572 | 2210023G05Rik | N/A | 1  |
| 10574641 | D230025D16Rik | N/A | 7  |
| 10574718 | Tmem208       | N/A | 13 |
| 10575160 | Nfat5         | N/A | 1  |
| 10575363 | Zfp612        | N/A | 1  |
| 10575512 | Cog4          | N/A | 13 |
| 10575619 | Terf2ip       | N/A | 1  |
| 10575763 | Gan           | N/A | 1  |
| 10576029 | Cox4i1        | N/A | 13 |
| 10576056 | Map1lc3b      | N/A | 7  |
| 10576160 | Acsc3         | N/A | 13 |
| 10576403 | Urb2          | N/A | 1  |
| 10576490 |               | N/A | 7  |
| 10576639 | Nrp1          | N/A | 1  |
| 10576692 | Insr          | N/A | 1  |
| 10577048 | Ankrd10       | N/A | 1  |

|          |               |     |    |
|----------|---------------|-----|----|
| 10577065 | Gm7606        | N/A | 13 |
| 10577070 | Tubgcp3       | N/A | 1  |
| 10577312 |               | N/A | 13 |
| 10577395 | 6820431F20Rik | N/A | 1  |
| 10577412 | Cdh11         | N/A | 1  |
| 10577602 |               | N/A | 13 |
| 10577623 | Gins4         | N/A | 13 |
| 10577922 | Hook3         | N/A | 1  |
| 10578025 |               | N/A | 13 |
| 10578037 | Eif3h         | N/A | 13 |
| 10578189 | Chd6          | N/A | 1  |
| 10578241 |               | N/A | 1  |
| 10578251 |               | N/A | 19 |
| 10578324 | Mtus1         | N/A | 7  |
| 10578421 | Adam34        | N/A | 13 |
| 10578572 | Stox2         | N/A | 19 |
| 10578619 | Cdkn2aip      | N/A | 1  |
| 10578794 |               | N/A | 13 |
| 10578962 | Gm10661       | N/A | 13 |
| 10578984 | Tufm          | N/A | 13 |
| 10578989 | Psd3          | N/A | 19 |
| 10579049 | Gm10033       | N/A | 1  |
| 10579052 | Gm10033       | N/A | 1  |
| 10579347 | Iffl3         | N/A | 13 |
| 10579356 | Pik3r2        | N/A | 13 |
| 10579437 | Ccdc124       | N/A | 13 |
| 10579812 | Ednra         | N/A | 1  |
| 10579915 | Smarca5       | N/A | 1  |
| 10579993 | Gm4787        | N/A | 1  |
| 10580010 | Pkn1          | N/A | 13 |
| 10580080 | Gm10643       | N/A | 13 |
| 10580183 |               | N/A | 7  |
| 10580300 | Asna1         | N/A | 13 |
| 10580486 | Brd7          | N/A | 1  |
| 10580537 | Aktip         | N/A | 13 |
| 10580622 | Gm5158        | N/A | 13 |
| 10580663 | AU018778      | N/A | 19 |
| 10580805 | Gm10286       | N/A | 13 |
| 10580870 | Zfp319        | N/A | 13 |
| 10580905 | Cnot1         | N/A | 1  |
| 10581009 | LOC280487     | N/A | 7  |
| 10581499 | Chtf8         | N/A | 13 |
| 10581571 | 4922502B01Rik | N/A | 13 |
| 10581926 | Adat1         | N/A | 1  |
| 10581959 |               | N/A | 13 |
| 10582123 | Hsd1l         | N/A | 13 |
| 10582427 | Cbfa2t3       | N/A | 13 |
| 10582839 | Gm9909        | N/A | 19 |
| 10582918 |               | N/A | 13 |
| 10582925 | Alkbh8        | N/A | 1  |
| 10582941 | Cwf19l2       | N/A | 1  |
| 10582983 | LOC280487     | N/A | 7  |
| 10583021 | Pdgfd         | N/A | 19 |
| 10583203 | Phxr4         | N/A | 1  |
| 10583450 | Zfp846        | N/A | 1  |
| 10583519 | Icam1         | N/A | 13 |
| 10583905 | Sept7         | N/A | 1  |
| 10583952 | Ncapd3        | N/A | 1  |
| 10584095 | Nfrkb         | N/A | 19 |
| 10584276 | Sec61g        | N/A | 1  |
| 10584403 | Olfir251      | N/A | 13 |
| 10584433 | Olfir914      | N/A | 13 |
| 10584504 | Olfir919      | N/A | 13 |
| 10584510 | Olfir970      | N/A | 13 |
| 10584514 | Olfir972      | N/A | 7  |
| 10585325 |               | N/A | 13 |
| 10585331 | Exp5          | N/A | 19 |
| 10585444 | Ireb2         | N/A | 7  |
| 10585586 | Ube2s         | N/A | 13 |
| 10585980 | Myo9a         | N/A | 19 |
| 10585982 | Myo9a         | N/A | 1  |
| 10585988 | Myo9a         | N/A | 1  |
| 10585990 | Myo9a         | N/A | 1  |
| 10586110 | Cln6          | N/A | 13 |
| 10586170 |               | N/A | 1  |
| 10586172 |               | N/A | 1  |
| 10586174 |               | N/A | 1  |
| 10586227 | Dennd4a       | N/A | 1  |
| 10586244 | Dennd4a       | N/A | 1  |
| 10586246 | Dennd4a       | N/A | 1  |
| 10586248 | Dennd4a       | N/A | 7  |
| 10586250 | Dennd4a       | N/A | 1  |
| 10586252 | Dennd4a       | N/A | 1  |
| 10586254 | Dennd4a       | N/A | 1  |

|          |               |     |    |
|----------|---------------|-----|----|
| 10586505 | Herc1         | N/A | 1  |
| 10586616 | Vps13c        | N/A | 1  |
| 10586781 | Myo1e         | N/A | 1  |
| 10586863 | LOC280487     | N/A | 7  |
| 10586880 | Suhw4         | N/A | 1  |
| 10586967 | Gm7265        | N/A | 1  |
| 10587082 | Onecut1       | N/A | 7  |
| 10587104 | Arpp19        | N/A | 1  |
| 10587419 | Senp6         | N/A | 1  |
| 10587446 | Myo6          | N/A | 1  |
| 10587776 |               | N/A | 1  |
| 10587892 | Atr           | N/A | 1  |
| 10587942 | Xrn1          | N/A | 1  |
| 10588049 | Copb2         | N/A | 1  |
| 10588482 | Wdr51a        | N/A | 7  |
| 10588577 | Cish          | N/A | 13 |
| 10588722 | Mon1a         | N/A | 13 |
| 10588893 | Rhoa          | N/A | 7  |
| 10589061 | Dalrd3        | N/A | 13 |
| 10589464 | Gm10615       | N/A | 1  |
| 10589565 | Setd2         | N/A | 1  |
| 10589756 | Epm2aip1      | N/A | 1  |
| 10589974 | LOC280487     | N/A | 7  |
| 10590253 | Rpsa          | N/A | 7  |
| 10590381 | Vipr1         | N/A | 13 |
| 10590389 | Nktr          | N/A | 1  |
| 10590479 | Zfp167        | N/A | 1  |
| 10590654 | Aasdhppt      | N/A | 1  |
| 10590799 | C330006D17Rik | N/A | 1  |
| 10590844 | 9030420J04Rik | N/A | 1  |
| 10591116 | Fat3          | N/A | 13 |
| 10591203 | Olfr860       | N/A | 13 |
| 10591228 | Zfp26         | N/A | 1  |
| 10591241 | Zfp426        | N/A | 1  |
| 10591253 | 5730601F06Rik | N/A | 1  |
| 10591472 | Cdc37         | N/A | 13 |
| 10591537 | Tmed1         | N/A | 13 |
| 10591612 | Dock6         | N/A | 19 |
| 10591614 | Dock6         | N/A | 19 |
| 10591726 | Ecsit         | N/A | 13 |
| 10591735 | Elof1         | N/A | 7  |
| 10591881 |               | N/A | 13 |
| 10592099 | Dcps          | N/A | 7  |
| 10592397 | Olfr144       | N/A | 13 |
| 10592585 | Sc5d          | N/A | 19 |
| 10592850 | Trappc4       | N/A | 13 |
| 10592926 | Tmem25        | N/A | 1  |
| 10593032 | Amica1        | N/A | 13 |
| 10593198 | Fam55b        | N/A | 1  |
| 10593219 | Nnmt          | N/A | 13 |
| 10593325 | Pts           | N/A | 19 |
| 10593367 | Dlat          | N/A | 19 |
| 10593430 | Ppp2r1b       | N/A | 1  |
| 10593497 | Zc3h12c       | N/A | 1  |
| 10593508 | Ddx10         | N/A | 1  |
| 10593668 | Dmxd2         | N/A | 19 |
| 10593671 | Dmxd2         | N/A | 19 |
| 10593713 | Cib2          | N/A | 13 |
| 10593799 | Scaper        | N/A | 1  |
| 10593882 | Gm10658       | N/A | 19 |
| 10593884 | Ptpn9         | N/A | 1  |
| 10593903 | Commd4        | N/A | 13 |
| 10594289 | Glce          | N/A | 7  |
| 10594322 | Pias1         | N/A | 1  |
| 10594517 | 5430433E21Rik | N/A | 13 |
| 10595327 | Phip          | N/A | 1  |
| 10595723 | 2610101N10Rik | N/A | 1  |
| 10595990 | Armc8         | N/A | 19 |
| 10596072 | Ppp2r3a       | N/A | 19 |
| 10596115 | Ephb1         | N/A | 13 |
| 10596261 | Dnajc13       | N/A | 1  |
| 10596263 | Dnajc13       | N/A | 19 |
| 10596265 | Dnajc13       | N/A | 1  |
| 10596267 | Dnajc13       | N/A | 1  |
| 10596273 | Dnajc13       | N/A | 1  |
| 10596275 | Dnajc13       | N/A | 1  |
| 10596277 | Dnajc13       | N/A | 1  |
| 10596281 | Dnajc13       | N/A | 1  |
| 10596857 | Apeh          | N/A | 13 |
| 10596893 | Dag1          | N/A | 19 |
| 10596900 | Tcta          | N/A | 19 |
| 10597095 | 3000002C10Rik | N/A | 1  |
| 10597273 | Rtp3          | N/A | 19 |
| 10597354 | Pdcd6ip       | N/A | 1  |

|          |                    |     |    |
|----------|--------------------|-----|----|
| 10597898 |                    | N/A | 13 |
| 10597913 | 1110059G10Rik      | N/A | 7  |
| 10598064 |                    | N/A | 7  |
| 10598071 |                    | N/A | 7  |
| 10598073 |                    | N/A | 7  |
| 10598212 |                    | N/A | 13 |
| 10598218 | Gmcl1l             | N/A | 13 |
| 10598225 | Gmcl1l             | N/A | 13 |
| 10598229 |                    | N/A | 13 |
| 10598422 | Gripap1            | N/A | 1  |
| 10598501 | EG627782           | N/A | 13 |
| 10598565 |                    | N/A | 13 |
| 10598612 | Otc                | N/A | 1  |
| 10598646 | Gm14484            | N/A | 13 |
| 10598648 | OTTMUSG00000016789 | N/A | 7  |
| 10598650 | OTTMUSG00000016789 | N/A | 13 |
| 10598652 | Gm14484            | N/A | 13 |
| 10598654 | OTTMUSG00000016789 | N/A | 13 |
| 10598678 | Usp9x              | N/A | 1  |
| 10599058 |                    | N/A | 13 |
| 10599060 |                    | N/A | 13 |
| 10599062 | RP23-110D11.1      | N/A | 13 |
| 10599064 | RP23-110D11.1      | N/A | 13 |
| 10599073 | RP23-110D11.1      | N/A | 13 |
| 10599075 | RP23-110D11.1      | N/A | 13 |
| 10599092 |                    | N/A | 13 |
| 10599094 | RP23-110D11.1      | N/A | 13 |
| 10599096 | RP23-110D11.1      | N/A | 13 |
| 10599105 | RP23-110D11.1      | N/A | 13 |
| 10599107 | RP23-110D11.1      | N/A | 13 |
| 10599213 |                    | N/A | 1  |
| 10599215 | Slc25a5            | N/A | 19 |
| 10599232 | Nkap               | N/A | 1  |
| 10599321 | Zbtb33             | N/A | 1  |
| 10599377 | Stag2              | N/A | 1  |
| 10599416 | Gm10483            | N/A | 7  |
| 10599498 | Utp14a             | N/A | 1  |
| 10599696 | Ddx26b             | N/A | 1  |
| 10600017 | Hmgb3              | N/A | 13 |
| 10600357 | Taz                | N/A | 1  |
| 10600372 | B230340J04Rik      | N/A | 19 |
| 10600453 | lkbkg              | N/A | 19 |
| 10600512 | Brc3               | N/A | 19 |
| 10600566 |                    | N/A | 1  |
| 10600718 |                    | N/A | 1  |
| 10600823 | LOC675747          | N/A | 13 |
| 10600911 | Yip6               | N/A | 1  |
| 10600971 | Otud6a             | N/A | 13 |
| 10601084 |                    | N/A | 13 |
| 10601235 | Ogt                | N/A | 19 |
| 10601328 | Uprt               | N/A | 1  |
| 10601449 | Sh3bgrl            | N/A | 1  |
| 10601581 | 9230105E10Rik      | N/A | 7  |
| 10601595 | 3110007F17Rik      | N/A | 7  |
| 10601598 | 3110007F17Rik      | N/A | 7  |
| 10602020 | Tbc1d8b            | N/A | 1  |
| 10602068 | Mid2               | N/A | 1  |
| 10602192 |                    | N/A | 19 |
| 10602372 | Alas2              | N/A | 7  |
| 10603023 |                    | N/A | 13 |
| 10603228 |                    | N/A | 13 |
| 10603545 |                    | N/A | 13 |
| 10603549 | LOC280487          | N/A | 7  |
| 10603625 |                    | N/A | 13 |
| 10603651 | 1810030O07Rik      | N/A | 1  |
| 10603659 | Med14              | N/A | 19 |
| 10603744 |                    | N/A | 1  |
| 10603803 | LOC280487          | N/A | 7  |
| 10603809 | Gm14636            | N/A | 1  |
| 10603878 | Uxt                | N/A | 1  |
| 10603953 |                    | N/A | 13 |
| 10603962 | RP23-110D11.1      | N/A | 13 |
| 10603964 | RP23-110D11.1      | N/A | 13 |
| 10603973 | RP23-110D11.1      | N/A | 13 |
| 10603975 | RP23-110D11.1      | N/A | 13 |
| 10603984 | RP23-110D11.1      | N/A | 13 |
| 10603986 | RP23-110D11.1      | N/A | 13 |
| 10603995 | RP23-110D11.1      | N/A | 13 |
| 10603997 | RP23-110D11.1      | N/A | 13 |
| 10604006 | RP23-110D11.1      | N/A | 13 |
| 10604008 | RP23-110D11.1      | N/A | 13 |
| 10604017 | RP23-110D11.1      | N/A | 13 |
| 10604021 | RP23-110D11.1      | N/A | 13 |
| 10604023 | RP23-110D11.1      | N/A | 13 |

|          |               |     |    |
|----------|---------------|-----|----|
| 10604038 | Sfrs17b       | N/A | 1  |
| 10604078 | Upf3b         | N/A | 1  |
| 10604187 | Lamp2         | N/A | 1  |
| 10604199 | Cul4b         | N/A | 1  |
| 10604234 | Gm7189        | N/A | 13 |
| 10604245 |               | N/A | 1  |
| 10604248 | Thoc2         | N/A | 1  |
| 10604337 |               | N/A | 1  |
| 10604505 | 6720401G13Rik | N/A | 1  |
| 10604610 |               | N/A | 13 |
| 10604735 | Rbmx          | N/A | 1  |
| 10604832 |               | N/A | 19 |
| 10605081 | Bcap31        | N/A | 13 |
| 10605319 | Ubl4          | N/A | 13 |
| 10605349 |               | N/A | 1  |
| 10605392 | F8            | N/A | 1  |
| 10605421 | Mtcp1         | N/A | 1  |
| 10605437 | Pls3          | N/A | 1  |
| 10605571 | Gyk           | N/A | 1  |
| 10605740 | Eif2s3x       | N/A | 1  |
| 10605782 |               | N/A | 7  |
| 10605952 | Gdpd2         | N/A | 13 |
| 10606088 | Hdac8         | N/A | 1  |
| 10606160 | Rfwd2         | N/A | 1  |
| 10606263 | Atrx          | N/A | 1  |
| 10606376 | 2610002M06Rik | N/A | 1  |
| 10606391 | Gm10452       | N/A | 1  |
| 10606393 | Brwd3         | N/A | 1  |
| 10606513 | Chm           | N/A | 1  |
| 10606969 | Rbm41         | N/A | 7  |
| 10607113 | Rgs3          | N/A | 13 |
| 10607116 | Ammecr1       | N/A | 1  |
| 10607246 | Tmem29        | N/A | 19 |
| 10607346 | Tspyl2        | N/A | 1  |
| 10607366 | Shroom2       | N/A | 7  |
| 10607391 |               | N/A | 13 |
| 10607398 |               | N/A | 19 |
| 10607429 | LOC280487     | N/A | 7  |
| 10607658 | Reps2         | N/A | 1  |
| 10607679 | 4932441K18Rik | N/A | 1  |
| 10607952 | Vamp7         | N/A | 1  |
| 10607972 | Kdm5d         | N/A | 1  |
| 10608001 | Eif2s3y       | N/A | 1  |
| 10608085 | Gm2889        | N/A | 13 |
| 10608107 |               | N/A | 1  |
| 10608209 |               | N/A | 13 |
| 10608212 |               | N/A | 13 |
| 10608222 |               | N/A | 13 |
| 10608237 | Sly           | N/A | 13 |
| 10608247 | LOC100042196  | N/A | 13 |
| 10608249 |               | N/A | 13 |
| 10608251 | LOC380994     | N/A | 13 |
| 10608263 | Sly           | N/A | 13 |
| 10608273 |               | N/A | 13 |
| 10608277 | LOC100041207  | N/A | 13 |
| 10608280 |               | N/A | 13 |
| 10608282 | LOC100041256  | N/A | 13 |
| 10608290 |               | N/A | 1  |
| 10608293 |               | N/A | 13 |
| 10608295 |               | N/A | 13 |
| 10608302 |               | N/A | 13 |
| 10608308 |               | N/A | 13 |
| 10608313 | Ssty1         | N/A | 13 |
| 10608317 | Ssty1         | N/A | 13 |
| 10608321 |               | N/A | 13 |
| 10608325 |               | N/A | 13 |
| 10608327 | LOC100041256  | N/A | 13 |
| 10608339 | Ssty2         | N/A | 13 |
| 10608342 | LOC100041233  | N/A | 13 |
| 10608346 | LOC665346     | N/A | 13 |
| 10608348 |               | N/A | 13 |
| 10608350 |               | N/A | 13 |
| 10608361 |               | N/A | 13 |
| 10608365 | Ssty2         | N/A | 13 |
| 10608368 | LOC100041256  | N/A | 13 |
| 10608371 |               | N/A | 13 |
| 10608373 | Ssty2         | N/A | 13 |
| 10608377 | LOC382133     | N/A | 13 |
| 10608382 |               | N/A | 13 |
| 10608385 | Sly           | N/A | 13 |
| 10608394 |               | N/A | 13 |
| 10608397 | Sly           | N/A | 13 |
| 10608410 | Sly           | N/A | 13 |
| 10608420 |               | N/A | 13 |



|          |              |     |    |
|----------|--------------|-----|----|
| 10608422 | Rmi1         | N/A | 1  |
| 10608424 |              | N/A | 13 |
| 10608426 |              | N/A | 13 |
| 10608429 | LOC380994    | N/A | 13 |
| 10608438 | Srsy         | N/A | 13 |
| 10608448 | LOC621831    | N/A | 13 |
| 10608452 |              | N/A | 13 |
| 10608454 |              | N/A | 13 |
| 10608457 |              | N/A | 13 |
| 10608460 | LOC665698    | N/A | 13 |
| 10608464 | Sly          | N/A | 13 |
| 10608474 | Srsy         | N/A | 13 |
| 10608477 |              | N/A | 13 |
| 10608480 | LOC100039147 | N/A | 13 |
| 10608482 |              | N/A | 13 |
| 10608484 |              | N/A | 13 |
| 10608488 |              | N/A | 13 |
| 10608499 |              | N/A | 13 |
| 10608501 |              | N/A | 13 |
| 10608506 |              | N/A | 13 |
| 10608513 |              | N/A | 13 |
| 10608517 |              | N/A | 13 |
| 10608521 |              | N/A | 13 |
| 10608531 |              | N/A | 13 |
| 10608549 |              | N/A | 13 |
| 10608567 |              | N/A | 13 |
| 10608573 |              | N/A | 13 |
| 10608576 |              | N/A | 13 |
| 10608583 | Srsy         | N/A | 13 |
| 10608586 | Sly          | N/A | 13 |
| 10608596 |              | N/A | 13 |
| 10608608 | Ssty2        | N/A | 13 |
| 10608613 |              | N/A | 13 |
| 10608615 | LOC380994    | N/A | 13 |
| 10608625 | LOC100040188 | N/A | 13 |
| 10608628 | LOC100041704 | N/A | 13 |
| 10608630 | Ssty2        | N/A | 13 |
