# Supplementary material for: Circadian Desynchrony Promotes Metabolic Disruption in a Mouse Model of Shiftwork
Source: PubMed Central journal article supplement (PMC3357388; doi:10.1371/journal.pone.0037150), 2012-05-21
Supplement: pone.0037150.s005.pdf [file pone.0037150.s005.pdf]

| <b>Term</b>                                | <b>No. of Genes</b> | <b>P-value</b> |
|--------------------------------------------|---------------------|----------------|
| GO:0008152 metabolic process               | 1033                | 2.90E-06       |
| GO:0009987 cellular process                | 1287                | 1.33E-05       |
| GO:0044085 cellular component biogenesis   | 103                 | 4.00E-03       |
| GO:0051234 establishment of localization   | 334                 | 3.10E-03       |
| GO:0051179 localization                    | 365                 | 1.20E-02       |
| GO:0016043 cellular component organization | 265                 | 1.50E-02       |
